# Supplementary material for: Enhanced activity of Alzheimer disease-associated variant of protein kinase Cα drives cognitive decline in a mouse model
Source: PubMed Central journal article supplement (PMC9684486; doi:10.1038/s41467-022-34679-7), 2022-11-23

# Enhanced Activity of Alzheimer Disease-associated Variant of PKC $\alpha$ Drives Cognitive Decline in a Mouse Model

Gema Lordén<sup>1</sup>, Jacob M. Wozniak<sup>1,2</sup>, Kim Doré<sup>3</sup>, Lara E. Dozier<sup>4</sup>, Chelsea Cates-Gatto<sup>5</sup>, Gentry N. Patrick<sup>4</sup>, David J. Gonzalez<sup>1,2</sup>, Amanda J. Roberts<sup>5</sup>, Rudolph E. Tanzi<sup>6</sup>, Alexandra C. Newton<sup>1\*</sup>

<sup>1</sup>Department of Pharmacology, University of California San Diego, La Jolla, CA 92093.

<sup>2</sup>Skaggs School of Pharmacy and Pharmaceutical Sciences, University of California San Diego, La Jolla, CA 92093.

<sup>3</sup>Center for Neural Circuits and Behavior, Department of Neurosciences, University of California San Diego, La Jolla, CA 92093.

<sup>4</sup>Section of Neurobiology. Division of Biological sciences, University of California San Diego, La Jolla, CA 92093.

<sup>5</sup>Animal Models Core Facility, The Scripps Research Institute, La Jolla, CA 92037.

<sup>6</sup>Genetics and Aging Research Unit, McCance Center for Brain Health, Department of Neurology, Massachusetts General Hospital and Harvard Medical School, Charlestown, MA 02129.

\*Correspondence to: [anewton@health.ucsd.edu](mailto:anewton@health.ucsd.edu)

## **Supplementary information includes:**

Material and Methods

Figures S1 to S4

Captions for Figures S1 to S4

Supplementary Tables T1, T2, T3

Captions for Tables T1 to T3

References

Uncropped scans of immunoblot from supplementary figures

Table dataset S1 – Submitted as a separated file

Table dataset S2 – Submitted as a separated file

The Mass spectrometry proteomics data were deposited to the MassIVE data base.

## CONTACT FOR REAGENT AND RESOURCE SHARING

Further information and requests for resources and reagents should be directed to and will be fulfilled by the Lead Contact, Alexandra Newton (anewton@ucsd.edu).

## SUPPLEMENTARY METHODS

### **Behavioral tests**

Locomotor activity test. Locomotor activity was measured in polycarbonate cages (42 x 22 x 20 cm) placed into frames (25.5 x 47 cm) mounted with two levels of photocell beams at 2 and 7 cm above the bottom of the cage (San Diego Instruments, San Diego, CA). These two sets of beams allowed for the recording of both horizontal (locomotion) and vertical (rearing) behavior. A thin layer of bedding material was applied to the bottom of the cage. Mice were tested for 120 minutes and data were collected in 5-minute intervals.

Light/dark test. The light/dark transfer procedure has been used to assess anxiety-like behavior in mice by capitalizing on the conflict between exploration of a novel environment and the avoidance of a brightly lit open field<sup>1</sup>. The apparatus is a rectangular box made of Plexiglas divided by a partition into two environments. One compartment (14.5x27x26.5 cm) is dark (8-16 lux) and the other compartment (28.5x27x26.5 cm) is highly illuminated (400-600 lux) by a 60 W light source located above it. The compartments are connected by an opening (7.5x7.5 cm) located at floor level in the center of the partition. The time spent in the light compartment is used as a predictor of anxiety-like behavior, i.e., a greater amount of time in the light compartment is indicative of decreased anxiety-like behavior. Mice were placed in the dark compartment to start the 5-minute test.

ANOVA was used for the statistical analyses of behavioral results, followed by *post hoc* Student's *t*-tests as appropriate to determine the p values.

### **Kinase assay**

Sample Preparation. Whole brain was lysed and homogenized as indicated in the main section of material and methods. Protein was quantified using a BCA protein assay kit (Thermo Fisher Scientific), and 2 mg of protein in 500  $\mu$ l of RIPA buffer was incubated for 16 h at 4 °C with 2  $\mu$ g of anti-PKC $\alpha$  (BD transduction laboratories, #610108) or its isotype control, IgG mouse (Santa Cruz, sc-2025). PKC $\alpha$  was

immunoprecipitated with 50  $\mu$ l of Protein A/G beads (Santa Cruz, sc-2003) for one hour at 4 °C and used to perform a kinase assay. Purity of the immunoprecipitated protein was assessed by Coomassie staining.

Kinase Assay. The activity of immunoprecipitated PKC $\alpha$  WT or M489V toward a peptide substrate (Ac-FKKSFKL-NH<sub>2</sub>) was determined as described previously <sup>2, 3</sup>. Briefly, immunoprecipitated protein was resuspended in 48  $\mu$ l of reaction buffer containing 50 mM Hepes, pH 7.5, 0.1 mg/mL BSA, and 2 mM DTT and then incubated in an 80  $\mu$ l reaction volume containing 50 mM Hepes, pH 7.5, 100  $\mu$ M ATP, 50  $\mu$ Ci <sup>32</sup>P-ATP (Perkin Elmer), 100  $\mu$ M substrate, 5 mM MgCl<sub>2</sub>, 0.06 mg/mL BSA, 1 mM DTT, and 500  $\mu$ M EGTA without (non-activating conditions) or with (activating conditions) 700  $\mu$ M CaCl<sub>2</sub> (corresponding to 200  $\mu$ M free Ca<sup>2+</sup>) and Triton X-100 (0.1% wt/vol) mixed micelles containing 15 mol % PS and 5 mol % DG. Following 5 min at 30 °C, reactions were quenched by addition of 25 mM ATP, 25 mM EDTA, pH 8; 5  $\mu$ l were removed for immunoblot to verify that equal amounts of PKC $\alpha$  WT and M489V were employed in the kinase assay and 85  $\mu$ l was prepared for analysis of <sup>32</sup>P-incorporation as described previously. <sup>4</sup>

### **PKC $\alpha$ -M489V Mouse**

The C57BL/6NTac-Prkca mice containing the M489V mutation in *Prkca* were generated by Taconic Biosciences GmbH. Along with the point mutation, an AflIII restriction site (A/CRYGT) was introduced in the sequence to facilitate genotyping. To verify the successful insertion of the mutation in the genome, genomic DNA was isolated from mouse tails. The fragment containing the M489V mutation was amplified by PCR (Primer forward, 5'- GAGTGCTCACTGAGACAAGCTAGG -3', and primer reverse, 5'- TGTCTCACTCAACATCTACAGGC-3') and subjected to Sanger sequencing. Our sequencing data indicates that the Met to Val was successfully inserted (Supp Figure 1A).

### **Amyloid- $\beta$ analysis**

ELISA: Brain tissues from APP transgenic mice harboring WT or mutant M489V PKC $\alpha$  were snap-frozen in liquid nitrogen and stored at -80 °C until use. Frozen brains were then homogenized in a Dounce tissue grinder and proteins sequentially extracted as previously described <sup>5</sup>. A $\beta$  levels in 2% SDS and formic acid extracts were quantified using the Human/Rat A $\beta$ -40 and A $\beta$ -42 ELISA kits from Wako (#294-62501 and #292-64501 respectively), following the manufacturer's recommendations.

HISTOLOGY: Formalin-fixed brains were embedded in paraffin and cut into 4  $\mu\text{m}$  sections. Deparaffinized sections were immuno-stained using a specific antibody for amyloid- $\beta$  (clone 6E10, 1:400 dilution). For quantitative analysis of the Amyloid- $\beta$  plaques in WT tg-AD and M489V tg-AD mice, cerebral cortex and hippocampus (n= four mice per group, approximately 4 fields per mice) of the brain were imaged using a Keyence BZ-9000E microscope. Quantifications were obtained by using the Image J v1.51k software to measure the total brain area analysis and the occupied area by amyloid- $\beta$ . Percentage of amyloid- $\beta$  area was determined by dividing the total area covered by amyloid- $\beta$  by the total area in each brain region.

## **SUPPLEMENTARY FIGURES**

# Supplementary Figure 1

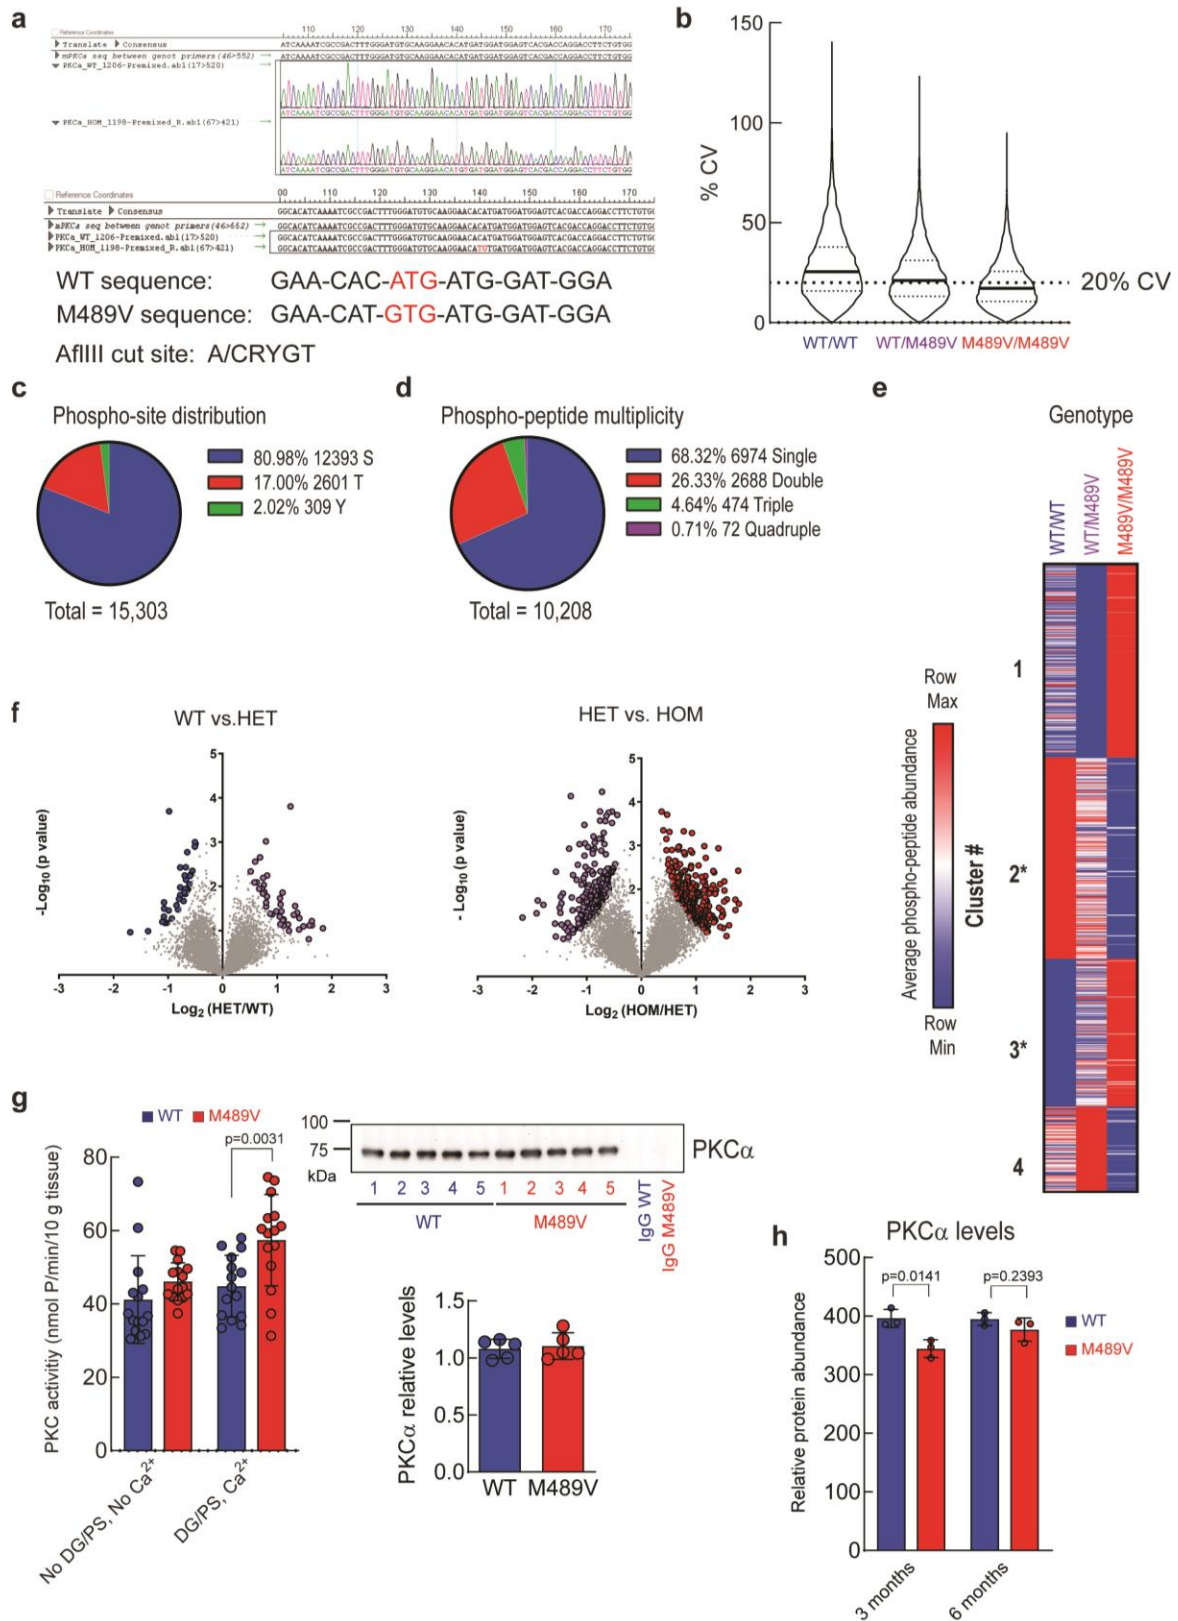

**Supplementary Figure 1 (Supp to Fig 1): Phosphoproteomics analysis in brains from WT mice and mice harboring the PKC $\alpha$  M489V mutation on C57BL/6 background.** A. Sanger-sequencing data from WT and M489V mice showing the correct insertion of the mutation. B. Co-efficient of variance plots for phosphoproteomics dataset 1 results. C. Pie charts of phosphosite distribution for the experiment in Figure 1. A total of 15,303 phosphosites were detected. D. Pie charts of phosphopeptide multiplicity for the experiment in Figure 1. A total of 10,208 peptides were quantified. E. Heatmap showing the distribution of significantly different peptides in the brains from different mice cohorts, highlighting the cluster 2 that contains peptides whose phosphorylation was decreased in a gene-dose dependent manner (WT/WT>WT/M489V>M489V/M489V), and cluster 3 that includes the peptides whose phosphorylation was increased in a gene-dose dependent manner (WT/WT<WT/M489V<M489V/M489V). Heatmap indicates whether the phosphorylation of a specific peptide is lower (blue) or higher (red). F. Volcano plot of phosphopeptides quantified from brains from WT mice vs. M489V heterozygous (HET) mice and HET vs. M489V homozygous (HOM) mice. The  $-\log_{10}$ -transformed p-values associated with individual phosphopeptides are plotted against the  $\log_2$ -transformed fold change in abundance between the compared groups. Significance was determined as in Figure 1B. G. Left. In vitro kinase assay showing the activity of PKC $\alpha$  WT (blue) or M489V (red) immunoprecipitated from murine brains. Data are graphed in units (nanomoles phosphate per minute) per 10 grams of tissue. Data represent the average  $\pm$  SEM of samples (p values determined with unpaired two-tailed Student's *t*-test, n=5 biological independent samples). Uncropped blot included in this file. Right. Immunoblot of immunoprecipitated proteins (PKC $\alpha$  WT, M489V or IgG control) used in the kinase assay probed with antibodies for total PKC $\alpha$ . Graph shows the quantification of bands using densitometry and represents the average normalized intensity  $\pm$  SEM. No statistical differences were found using a two-tailed Student's *t*-test. H. Graph showing the abundance of PKC $\alpha$  (average  $\pm$  SD) in brains from WT (blue) and M489V homozygous (red) mice at 3 and 6 months of age (p values generated with a two-tailed Student's *t*-test, n=3 biological independent samples).

## Supplementary Figure 2

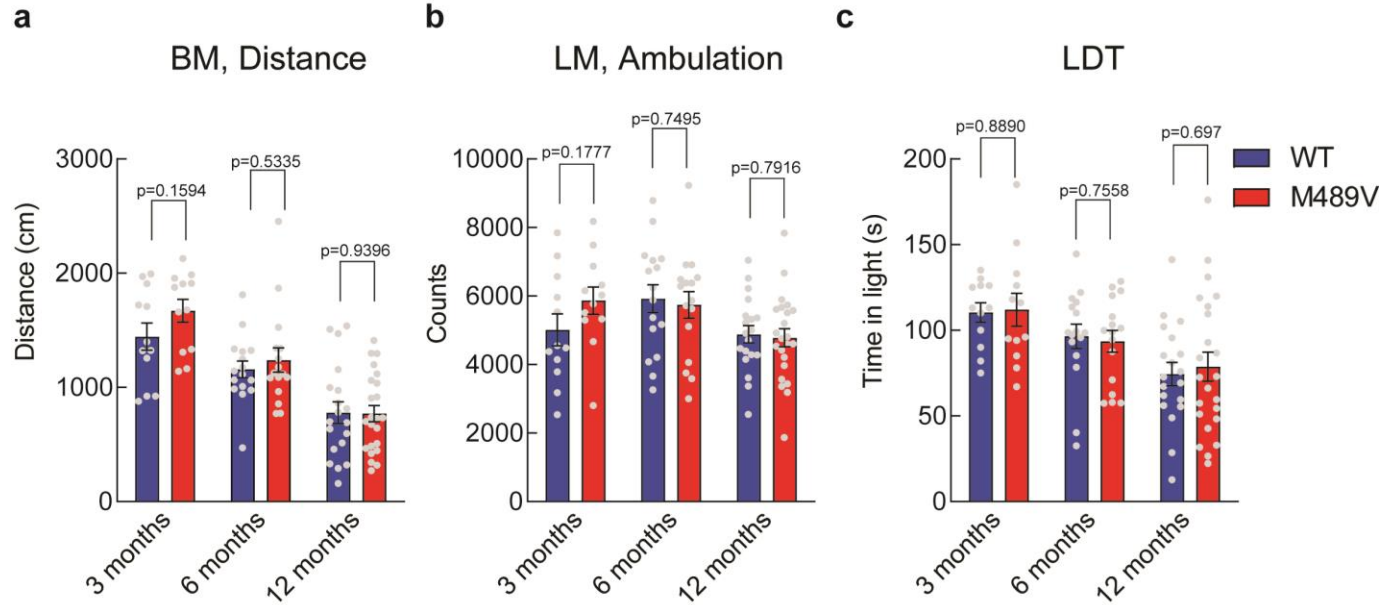

**Supplementary Figure 2 (Supp to Fig 3): Additional behavioral tests on WT and M489V C57BL/6 mice.** A. Distance traveled in the Barnes maze probe test (BM), B. ambulation in the locomotor test (LM), and C. time in light in the light/dark test (LTD) in PKC $\alpha$  WT and M489V mice at 3, 6 and 12 months mice. Same mice cohorts used in Figure 1 were subjected to these behavioral tests. Group sizes: 3 month (WT: 4 males, 8 females, M489V littermates: 6 males, 6 females), 6 month (WT: 8 males, 8 females, M489V littermates: 8 males, 8 females), 12 month (WT: 7 males, 12 females, M489V littermates: 12 males, 11 females). Error bars show standard error of the mean. ANOVA was used for statistical analysis and no statistical differences were found using a two-tailed Student's t-test. No sex effect was observed (n.s.= not significant). Source data are provided in the Source Data file.

### Supplementary Figure 3

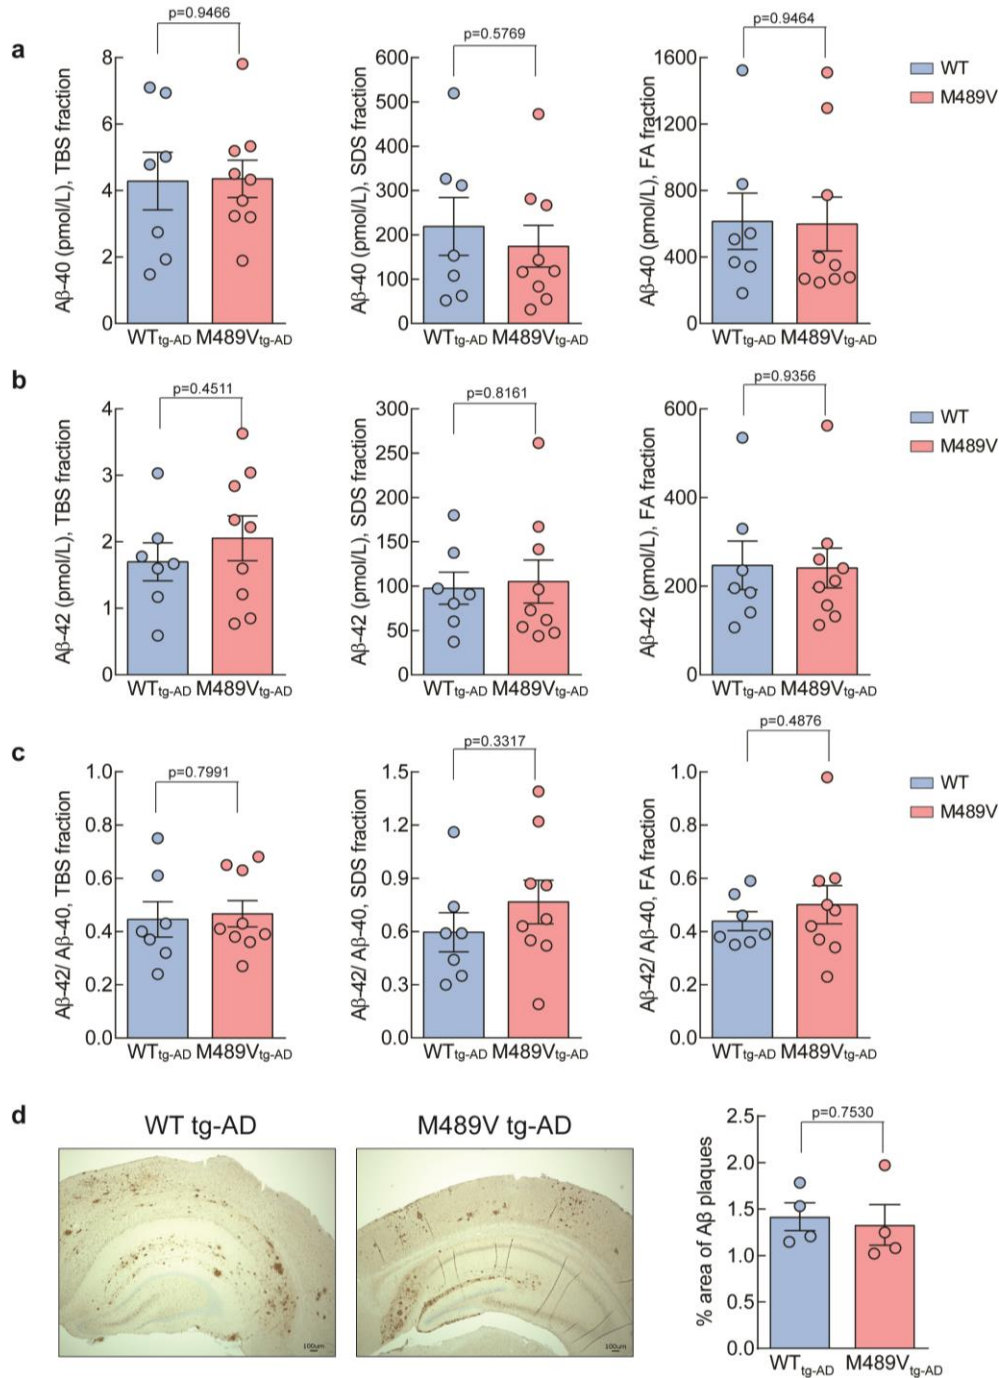

**Supplementary Figure 3: Amyloid- $\beta$  protein levels in brains from WT mice and mice harboring the PKC $\alpha$  M489V mutation on an AD transgenic mouse.** A $\beta$ -40 (A), and A $\beta$ -42 (B) protein levels were quantified by ELISA in TBS soluble, SDS soluble and formic acid (FA) fractions of brain homogenates from WT tg-AD (blue) and M489V tg-AD (red) mice at 12 months of age. C. A $\beta$ -42/ A $\beta$ -40 ratios. The graphs in A, B, and C depict the average  $\pm$  SEM. No significant differences between groups were found using a two-tailed Student's *t*-test ( $n=7$  WT<sub>tg-AD</sub> and  $n=9$  M489V<sub>tg-AD</sub> mice). D. Left, Representative image of A $\beta$  staining by immunohistochemistry of WT tg-AD and M489V tg-AD mice brain. Scale bar represents 100  $\mu$ m. Right. Quantification represents the average  $\pm$  SEM of samples % area of A $\beta$  in the brain. No statistical differences were found using a two-tailed Student's *t*-test ( $n=4$  mice). Source data are provided in the Source Data file.



## Supplementary Figure 4

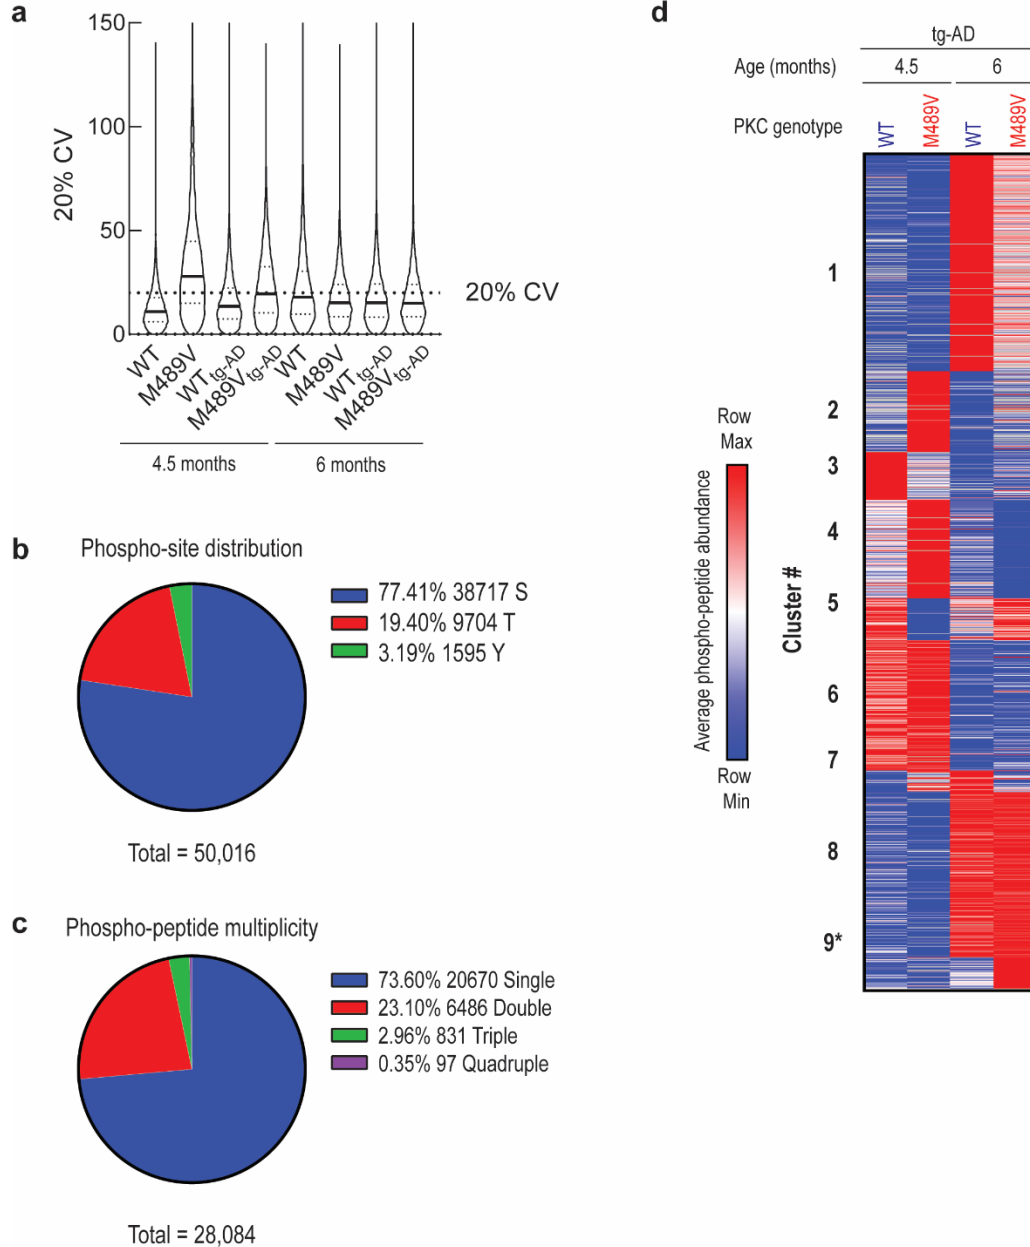

**Supplementary Figure 4 (Supp to Fig 5): Phosphoproteomics analysis in brains from PKC $\alpha$  WT and M489V mice in the presence or absence of the APP transgene.** A. Co-efficient of variance plots for phosphoproteomics dataset 2 results. B. Pie charts of phosphosite distribution for the experiment in Figure 5. A total of 50,016 phosphosites were detected. C. Pie charts of phosphopeptide multiplicity for the experiment in Figure 5. A total of 28,084 peptides were quantified. D. Heatmap showing the distribution of significantly different peptides in the brains from WT tg-AD and M489V tg-AD mice at 4.5 and 6 months, highlighting cluster 9 that contains peptides whose phosphorylation was increased in the M489V tg-AD mice 6 months old mice. Heatmap indicates whether the phosphorylation of a specific peptide is lower (blue) or higher (red). Source data for A, B, and C are provided in the Source Data file.

## Supplementary Figure 5

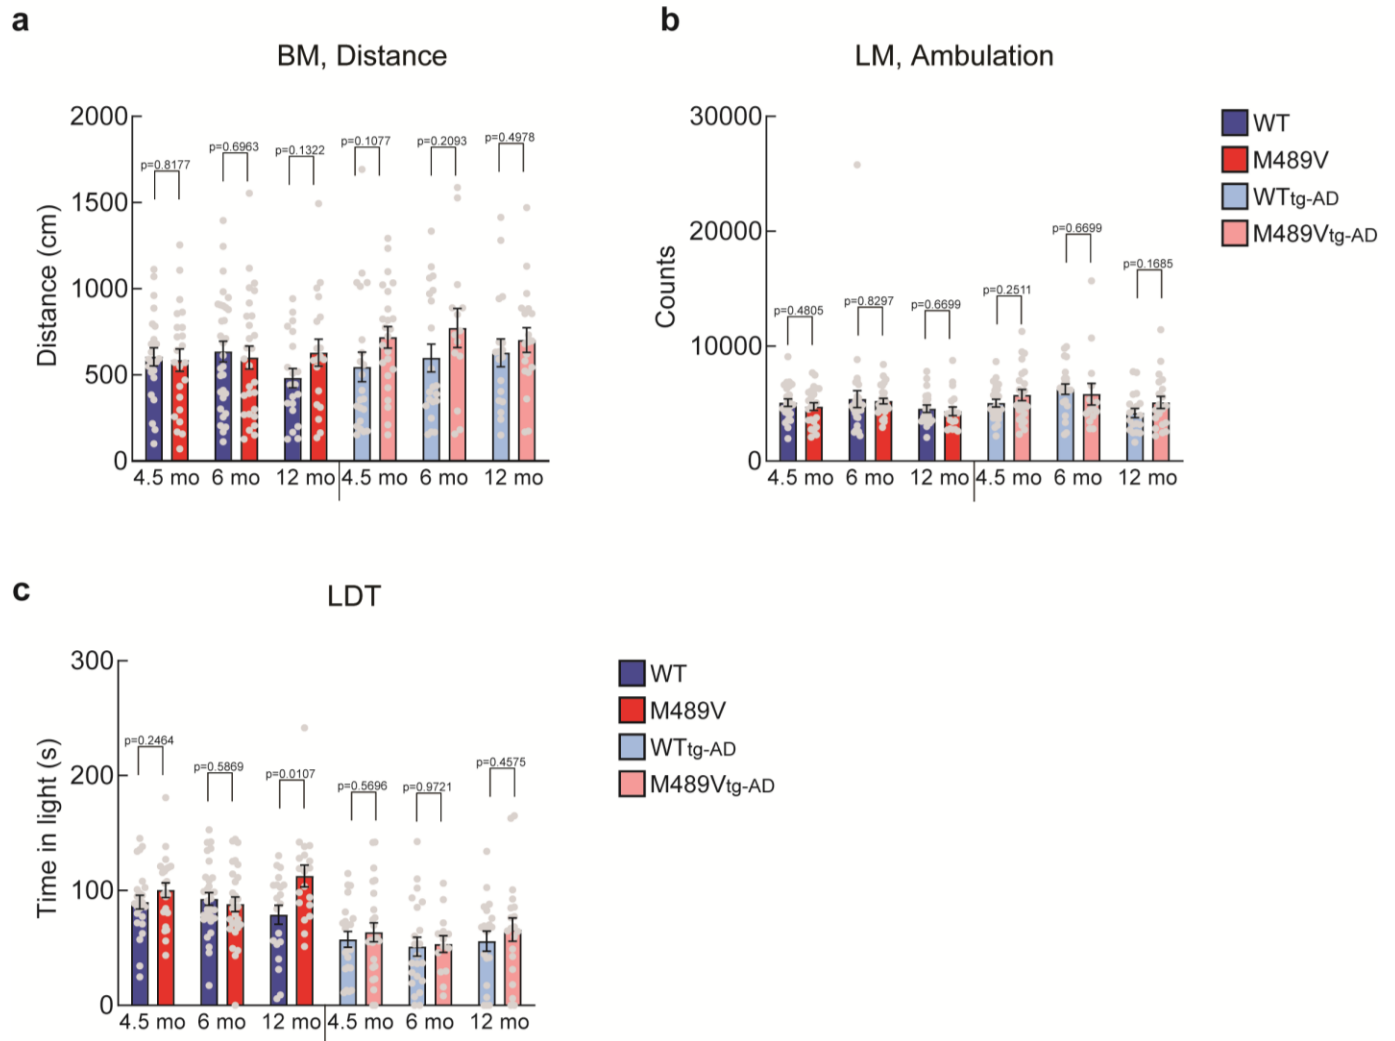

**Supplementary Figure 5 (Supp to Fig 6): Additional behavioral tests on WT tg-AD and M489V tg-mice** A. Distance traveled in the Barnes maze probe test (BM), B. ambulation in the locomotor test (LM), and C. time in light in the light/dark test (LDT) in WT non tg-AD (WT), M489V non tg-AD (M489V), WT tg-AD and M489V tg-AD mice at 4.5, 6, and 12 months. Group sizes: 4.5 month (WT non tg-AD (WT): 12 males, 12 females, M489V non tg-AD (M489V): 11 males, 12 females, WT harboring the APP<sup>swe</sup> transgene (WT tg-AD): 11 males, 11 females, M489V harboring the APP<sup>swe</sup> transgene (M489V tg-AD): 12 males, 12 females), 6 month (WT: 15 males, 16 females, M489V: 12 males, 16 females, WTAPP: 10 males, 11 females, M489VAPP: 8 males, 6 females), 12 month (WT: 10 males, 10 females, M489V: 10 males, 9 females, WTAPP: 9 males, 9 females, M489VAPP: 5 males, 14 females). Same mice cohorts used in Figure 6 were subjected to these behavioral tests. In A, B, and C error bars show standard error of the mean. ANOVA was used for statistical analysis followed by a two-tailed Student's *t*-test. ANOVA was used for statistical analysis, followed by post hoc two-tailed Student's *t*-test to determine the *p* values, and no statistical differences were found. No sex effect was observed. Source data are provided in the Source Data file.

## SUPPLEMENTARY TABLES

| Description                                                               | Annotated Sequence                    | ProtLoc                  | WT   | M489V | FC   | p value |
|---------------------------------------------------------------------------|---------------------------------------|--------------------------|------|-------|------|---------|
| [F-actin]-methionine sulfoxide oxidase MICAL3 =Mical3                     | sAGDQPPLLTpKsPsDkELR                  | S1404.S1406              | 0.05 | 0.19  | 3.60 | 0.0122  |
| Stromal membrane-associated protein 2 =Smap2                              | tSNALEkDLDLLASVPsPSSVSR               | S221                     | 0.06 | 0.20  | 3.42 | 0.0303  |
| PC4 and SFRS1-interacting protein =Psp1                                   | nLakPGVTSTsDsEDEDQEGEkR               | T269.S270.T271.S272.S274 | 0.06 | 0.18  | 3.08 | 0.0228  |
| PC4 and SFRS1-interacting protein =Psp1                                   | nLakPGVTSTsDsEDEDQEGEkR               | S272.S274                | 0.06 | 0.18  | 2.96 | 0.0179  |
| PC4 and SFRS1-interacting protein =Psp1                                   | nLakPGVTSTsDsEDEDQEGEkR               | S270.T271.S272.S274      | 0.06 | 0.18  | 2.95 | 0.0148  |
| Stromal membrane-associated protein 2 =Smap2                              | tSNALEkDLDLLASVPsPSSVSR               | S219                     | 0.06 | 0.19  | 2.92 | 0.0270  |
| Stromal membrane-associated protein 2 =Smap2                              | tSNALEkDLDLLASVPsPSSVSR               | S219                     | 0.07 | 0.19  | 2.72 | 0.0272  |
| [F-actin]-methionine sulfoxide oxidase MICAL3 =Mical3                     | kSFVESVDEIPIFADDVEDTYDDkTEDsSLQEK     | T1529                    | 0.06 | 0.17  | 2.71 | 0.0035  |
| Stromal membrane-associated protein 2 =Smap2                              | tSNALEkDLDLLASVPsPSSVSR               | S219                     | 0.07 | 0.19  | 2.64 | 0.0454  |
| Isoform Tau-A of Microtubule-associated protein tau =Mapt                 | iGStENLkHQPGGGk                       | T252                     | 0.07 | 0.18  | 2.57 | 0.0228  |
| NMDA receptor synaptotagmin signaling and neuronal migration factor =Nsmf | qHskLLDFDDVL                          | S523                     | 0.07 | 0.18  | 2.51 | 0.0193  |
| Sorting nexin-5 =Snx5                                                     | sVSVDLNVDPQLDIPDALSERDKvk             | S20                      | 0.08 | 0.20  | 2.49 | 0.0277  |
| PC4 and SFRS1-interacting protein =Psp1                                   | nLakPGVTSTsDsEDEDQEGEkR               | T271.S272.S274           | 0.07 | 0.17  | 2.45 | 0.0111  |
| Microtubule-associated protein 2 =Map2                                    | yTVPLPsPVQDSENLSGESGSFYEGTDDkVRR      | S897                     | 0.07 | 0.17  | 2.41 | 0.0402  |
| Isoform 2 of Homer protein homolog 3 =Homer3                              | eksQDGGFSTGLALASHQVPPSPLVSTNGPGEEKLFR | S120                     | 0.07 | 0.17  | 2.36 | 0.0208  |
| ZW10 interactor =Zwint                                                    | nQsYLQLLcSLQNK                        | S216                     | 0.08 | 0.18  | 2.34 | 0.0393  |
| Cell division cycle 5-like protein =Cdc5l                                 | skLVLPAPQISDAELQEVvk                  | S293                     | 0.08 | 0.18  | 2.32 | 0.0243  |
| Dynamin-1-like protein =Dnm1l                                             | hLskGVEAEWgk                          | S95                      | 0.08 | 0.18  | 2.31 | 0.0332  |
| Septin-7 =Sept7                                                           | iLEQQNSSRILEkNk                       | S423                     | 0.08 | 0.18  | 2.30 | 0.0065  |
| PC4 and SFRS1-interacting protein =Psp1                                   | nLakPGVTSTsDsEDEDQEGEkR               | T271                     | 0.07 | 0.17  | 2.30 | 0.0339  |
| [F-actin]-methionine sulfoxide oxidase MICAL3 =Mical3                     | sAGDQPPLLTpKsPSDKELR                  | S1404                    | 0.08 | 0.18  | 2.29 | 0.0263  |
| Epsin-3 =Epn3                                                             | dSAQALPTGksPSTVELDPFGDSSPScK          | S445                     | 0.09 | 0.20  | 2.29 | 0.0173  |
| Synaptotagmin =Synpo                                                      | hLEKvAsEEEEVPLVYVYk                   | S258                     | 0.08 | 0.17  | 2.29 | 0.0243  |
| Microtubule-associated protein 1A =Map1a                                  | eMTLDQksPEkAk                         | T1813                    | 0.06 | 0.15  | 2.27 | 0.0113  |
| Brain-specific angiogenesis inhibitor 1 =Bai1                             | nENVATLSVSSkLERR                      | S1467                    | 0.07 | 0.17  | 2.27 | 0.0188  |

**Supplementary Table 1: Top 25 phosphosites enhanced by the PKC M489V variant in C57 mice at 3 months old.** Table shows the protein, phosphorylation sites and encompassing residues, WT and M489V values, fold change (FC) and the p value determined using a two-tailed Student's *t*-test not corrected for multiple hypotheses.

| Description                                                                        | Annotated sequence                                   | ProtLoc             | WT tg | M489V tg | FC   | p value |
|------------------------------------------------------------------------------------|------------------------------------------------------|---------------------|-------|----------|------|---------|
| Microtubule-associated protein =Mapt                                               | AKTDHGAEIVYKSPVVGDTsPR                               | T711.S712           | 0.18  | 0.46     | 2.51 | 0.03    |
| Gap junction alpha-1 protein =Gja1                                                 | VAAGHELQPLAIVDQRPSRASSRASSRPRDDLEI_S18 S19 S23 S26_3 | S364.S365.S369.S372 | 0.12  | 0.30     | 2.39 | 0.03    |
| Electrogenic sodium bicarbonate cotransporter 1 =Slc4a4                            | NLTSSSLNDISDKPEKDQLK_S4 S5 S6_2                      | S255.S256.S257      | 0.16  | 0.31     | 1.97 | 0.01    |
| Microtubule-associated protein =Mapt                                               | AKTDHGAEIVYKSPVVGDTsPR                               | T711                | 0.21  | 0.41     | 1.91 | 0.05    |
| Isoform 2 of FACT complex subunit SSRP1 =Ssrp1                                     | GLKEGINPGYDDYADsDEQHDHAYLER                          | S444                | 0.19  | 0.37     | 1.91 | 0.02    |
| Amphiphysin =Amph                                                                  | TPSPPEEPSPLPSPASPNTLAPASPAPVPRPR_T1 S3 S17_2         | T260.S262.S276      | 0.20  | 0.38     | 1.89 | 0.02    |
| Protein piccolo =Pc1o                                                              | SMsDPKPLSPTADESSRAPFQYSEGFTAK                        | S3610               | 0.17  | 0.32     | 1.87 | 0.02    |
| Protein unc-80 homolog =Unc80                                                      | VASIQsEPGQQNVLLQQPLGR                                | S3113               | 0.21  | 0.36     | 1.73 | 0.05    |
| Microtubule-associated protein =Mapt                                               | AKTDHGAEIVYKSPVVGDTsPR_T20 S21_1                     | T711.S712           | 0.22  | 0.37     | 1.68 | 0.05    |
| Protein kinase C epsilon type =Prkce                                               | SAPTSPCDQELKELENNIRK_T4 S5_1                         | T349.S350           | 0.23  | 0.38     | 1.65 | 0.00    |
| Microtubule-associated protein =Mapt                                               | AKTDHGAEIVYKSPVVGDTsPR                               | S712                | 0.22  | 0.37     | 1.64 | 0.05    |
| G protein-regulated inducer of neurite outgrowth 1 =Gprin1                         | KVDPTTVEPVSLGKADsASPSR                               | S618                | 0.20  | 0.32     | 1.64 | 0.05    |
| Neuromodulin =Gap43                                                                | AEDGPAKEEPKQADVPAAVTDAATIPAAEDAATK                   | T172                | 0.24  | 0.40     | 1.63 | 0.02    |
| RalA-binding protein 1 =Ralbp1                                                     | TPSSEEISPTKFPGLYR_S3 S4 S8_2                         | S29.S30.S34         | 0.21  | 0.35     | 1.63 | 0.00    |
| Electrogenic sodium bicarbonate cotransporter 1 =Slc4a4                            | ERISENYSDKsDVENADESSSILKPLISPAER                     | S68                 | 0.19  | 0.30     | 1.57 | 0.04    |
| Acidic leucine-rich nuclear phosphoprotein 32 family member A =Anp32a              | NRtPSDVKELVLDNCK                                     | T15                 | 0.22  | 0.34     | 1.55 | 0.05    |
| Cell cycle exit and neuronal differentiation protein 1 =Cend1                      | ADPVLNHNHNLKPAPTVPAAPsSPDATSEPK                      | S89                 | 0.24  | 0.38     | 1.54 | 0.05    |
| Ubiquitin recognition factor in ER-associated degradation protein 1 =Ufd1          | FIAFSGEGQsLRKK                                       | S299                | 0.14  | 0.22     | 1.53 | 0.02    |
| Disks large-associated protein 3 =Dlgap3                                           | AIQAGCsQDDDLPLLAAPASVSGRPGSSFNFRK                    | S510                | 0.17  | 0.26     | 1.53 | 0.01    |
| Protein kinase C and casein kinase substrate in neurons protein 1 =Pacsin1         | KAEGATLSNATGAVESTsQAGDR                              | S336                | 0.21  | 0.32     | 1.53 | 0.02    |
| Caskin-1 =Caskin1                                                                  | RKTPQSLEMMIAIESPPPPEAAECQsPK                         | S650                | 0.21  | 0.31     | 1.51 | 0.03    |
| Caskin-1 =Caskin1                                                                  | sQEYLLDEGMAGTPPK                                     | S728                | 0.11  | 0.17     | 1.50 | 0.02    |
| Paralemmin-1 =Palm                                                                 | EIDVLEFGESAPAASKENSAAPsPGRPQSASPAKEEQK               | S116                | 0.23  | 0.35     | 1.50 | 0.02    |
| Inositol hexakisphosphate and diphosphoinositol-pentakisphosphate kinase 2 =Pip5k2 | RFFHHAEEEEEDEsPPER                                   | S38                 | 0.18  | 0.27     | 1.49 | 0.04    |
| Leucine zipper protein 1 =Luzp1                                                    | EKPDsDDDLIESFVTAk                                    | S660                | 0.16  | 0.24     | 1.48 | 0.04    |

**Supplementary Table 2: Top 25 phosphosites enhanced by the PKC M489V variant in tg-AD mice at 4.5 months old.** Table shows the protein, phosphorylation sites and encompassing residues, WT and M489V values, fold change (FC) and the p value determined using a two-tailed Student's *t*-test not corrected for multiple hypotheses.

| Description                                                                | Identifier                                           | ProtLoc             | WT tg | M489V tg | FC   | p value |
|----------------------------------------------------------------------------|------------------------------------------------------|---------------------|-------|----------|------|---------|
| PH and SEC7 domain-containing protein 3 =Psd3                              | sHSSPSLNPDASPVTAK                                    | S337                | 0.28  | 0.55     | 2.00 | 0.03    |
| Calcium/calmodulin-dependent protein kinase type II subunit alpha =Camk2a  | KNDGVKESSESTNTTIEDEDTK                               | S330                | 0.14  | 0.25     | 1.73 | 0.02    |
| DnaJ homolog subfamily C member 5 =Dnajc5                                  | QRSLSTSGESLYHVLGLDK_S5 T6_1                          | S10.T11             | 0.19  | 0.31     | 1.66 | 0.03    |
| Forkhead box protein K1 =Foxk1                                             | SLVSPiPsPTGTiSVPNSCPAsPR                             | S229.S243           | 0.17  | 0.28     | 1.64 | 0.03    |
| Microtubule-associated protein 1B =Map1b                                   | SDiSPLiPREsSPLYSPGFSDSTSAAK                          | S1781.T1784.S1788   | 0.18  | 0.30     | 1.63 | 0.05    |
| Isoform 2 of Ankyrin-2 =Ank2                                               | YVsSDGTEKEEVTMQGMPQEPVNIEDGDNYSK                     | S3878               | 0.20  | 0.32     | 1.62 | 0.01    |
| Neurofilament 3, medium =Nefm                                              | KGEDsSDDKVVTK                                        | S779                | 0.16  | 0.25     | 1.61 | 0.04    |
| Nectin-1 =Nectin1                                                          | KAGPLGGsYEEEEEGGGGER                                 | S434                | 0.15  | 0.25     | 1.59 | 0.04    |
| AP-3 complex subunit beta-1 =Ap3b1                                         | NFYsEEEEEEKEK                                        | Y274                | 0.14  | 0.22     | 1.59 | 0.01    |
| AP-3 complex subunit beta-1 =Ap3b1                                         | NFYsEEEEEEKEK                                        | S276                | 0.14  | 0.22     | 1.59 | 0.04    |
| GTP-binding protein 1 =Gtbbp1                                              | LHGGFSDSCSEdGEALNGEPELDLTSK_S7 S10_1                 | S44.S47             | 0.14  | 0.22     | 1.57 | 0.03    |
| Microtubule-associated protein =Mapt                                       | SPVVsGDTsPR                                          | S708.S712           | 0.09  | 0.15     | 1.56 | 0.02    |
| PC4 and SFRS1-interacting protein =Psp1                                    | QSNAsDVEVEEKETNVSKEDTDQEEK                           | S106                | 0.15  | 0.23     | 1.56 | 0.02    |
| Anaphase-promoting complex subunit 4 =Anapc4                               | IKEEVLsESETEAHQDAALDPDVVIK                           | S777                | 0.18  | 0.27     | 1.56 | 0.05    |
| Slc24a2 protein =Slc24a2                                                   | IELPNSTSEVEMTPSSEASEPVQNGNLSHNIEAADAPK_S6 T7 S8 T9_1 | S463.T464.S465.T466 | 0.19  | 0.29     | 1.54 | 0.03    |
| Protein PRRC2A =Prcc2a                                                     | LKFDEEDGRDsDEEGAEGHK                                 | S342.S350           | 0.14  | 0.22     | 1.53 | 0.01    |
| Calcium/calmodulin-dependent protein kinase type II subunit alpha =Camk2a  | ESSESTNTTIEDEDTKVR                                   | T337                | 0.15  | 0.23     | 1.49 | 0.00    |
| Plasma membrane calcium-transporting ATPase 1 =Atp2b1                      | AQDGAAMEMQPLKsEEGGDGDKEK                             | S338                | 0.17  | 0.25     | 1.47 | 0.01    |
| UPF0606 protein KIAA1549 =Kiaa1549                                         | GHYEFVVDLssGDTK                                      | S1543.S1544         | 0.21  | 0.31     | 1.46 | 0.05    |
| Histone deacetylase =Hdac2                                                 | RIACDEEFsDsEDEGEGR                                   | S422.S424           | 0.16  | 0.23     | 1.45 | 0.01    |
| Hepatocyte cell adhesion molecule =Hepacam                                 | SEADTLPRsGEQER                                       | S301                | 0.15  | 0.22     | 1.44 | 0.02    |
| Brain acid soluble protein 1 =Basp1                                        | KAEGAGIEEGIPKESEPQAADATEVK                           | T31.T36             | 0.20  | 0.28     | 1.44 | 0.02    |
| Protein kinase C and casein kinase substrate in neurons protein 1 =Pacsin1 | GQTYATEWsDDESGNPFGGNEANGGANPFEDDAKGVR                | S358                | 0.27  | 0.38     | 1.43 | 0.05    |
| Serine/threonine-protein kinase PAK 1 =Pak1                                | SVIEPLVPTTRDVATSPISPTENNTTPDALTR_S17 S20 T22_2       | S219.S222.T224      | 0.26  | 0.37     | 1.42 | 0.04    |
| RIKEN cDNA 2010300C02 gene =2010300C02Rik                                  | KIMAPPERDMsPSEGDVAPPK                                | S570                | 0.13  | 0.18     | 1.42 | 0.00    |

**Supplementary Table 3: Top 25 phosphosites enhanced by the PKC M489V variant in tg-AD mice at 6 months old.** Table shows the protein, phosphorylation sites and encompassing residues, WT and M489V values, fold change (FC) and the p value determined using a two-tailed Student's *t*-test not corrected for multiple hypotheses.

## SUPPLEMENTARY REFERENCES

1. Crawley JN. Behavioral phenotyping of transgenic and knockout mice: experimental design and evaluation of general health, sensory functions, motor abilities, and specific behavioral tests. *Brain research* **835**, 18-26 (1999).
2. Callender JA, *et al.* Protein kinase Calpha gain-of-function variant in Alzheimer's disease displays enhanced catalysis by a mechanism that evades down-regulation. *Proc Natl Acad Sci U S A* **115**, E5497-E5505 (2018).
3. Keranen LM, Newton AC. Ca<sup>2+</sup> differentially regulates conventional protein kinase Cs' membrane interaction and activation. *J Biol Chem* **272**, 25959-25967 (1997).
4. Tobias IS, *et al.* Protein kinase Czeta exhibits constitutive phosphorylation and phosphatidylinositol-3,4,5-triphosphate-independent regulation. *Biochem J* **473**, 509-523 (2016).
5. Kawarabayashi T, Younkin LH, Saido TC, Shoji M, Ashe KH, Younkin SG. Age-dependent changes in brain, CSF, and plasma amyloid (beta) protein in the Tg2576 transgenic mouse model of Alzheimer's disease. *J Neurosci* **21**, 372-381 (2001).

UNCROPPED SCANS OF IMMUNOBLOT FROM SUPPLEMENTARY FIGURES

For Supplementary Figure 1G

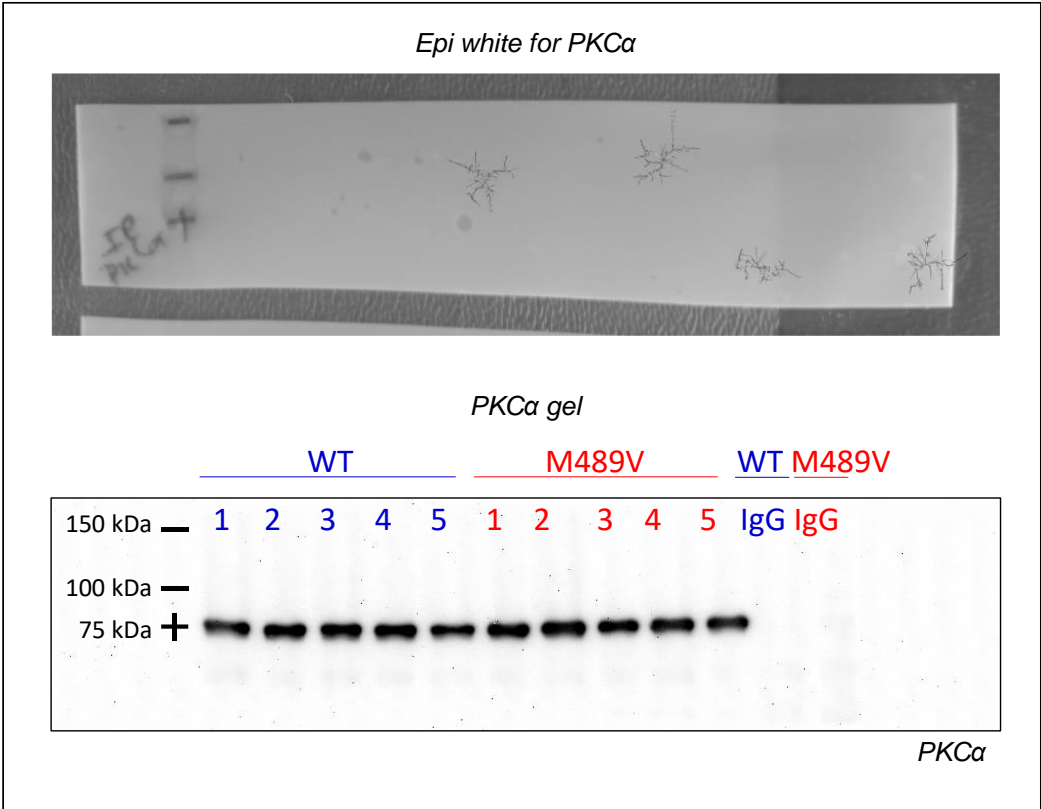

Supplement: 41467_2022_34679_MOESM1_ESM.pdf [file 41467_2022_34679_MOESM1_ESM.pdf]
