# Supplementary material for: Enhanced activity of Alzheimer disease-associated variant of protein kinase Cα drives cognitive decline in a mouse model
Source: Nat Commun. 2022 Nov 23;13:7200. doi: 10.1038/s41467-022-34679-7 (PMC9684486; doi:10.1038/s41467-022-34679-7)
Supplement: Supplementary file 4 — Supplementary Data 1 [file 41467_2022_34679_MOESM4_ESM.xlsx]

## Sheet: Standard_Proteomics
ProteinID	Description	WT_Rep1	WT_Rep2	WT_Rep3	HET_Rep1	HET_Rep2	HET_Rep3	HOM_Rep1	HOM_Rep2	HOM_Rep3
A0A023T778	Mago nashi protein OS=Mus musculus GN=Magohb PE=1 SV=1	497.247	331.75	386.523	279.398	463.646	283.754	404.528	284.799	359.032
A0A075B5M7	Immunoglobulin kappa variable 5-39 OS=Mus musculus GN=Igkv5-39 PE=1 SV=7	283.261	167.336	497.969	410.741	537.016	241.797	244.591	481.214	500.801
A0A075B5P2	Immunoglobulin kappa constant (Fragment) OS=Mus musculus GN=Igkc PE=1 SV=1	384.661	199.504	380.384	260.44	811.245	231.45	234.583	300.341	466.317
A0A075B5P3	Immunoglobulin heavy constant gamma 2B (Fragment) OS=Mus musculus GN=Ighg2b PE=1 SV=1	361.152	400.384	292.63	361.259	449.436	335.32	495.487	315.612	395.251
A0A075B6A0	Ig mu chain C region (Fragment) OS=Mus musculus GN=Ighm PE=1 SV=2	388.105	324.265	264.786	359.052	638.211	348.109	271.164	311.929	433.512
A0A087WNQ7	Small integral membrane protein 10-like 1 OS=Mus musculus GN=Smim10l1 PE=1 SV=1	296.218	367.302	340.494	413.025	371.935	401.592	413.116	427.281	399.535
A0A087WNT1	Elongin-C OS=Mus musculus GN=Eloc PE=1 SV=1	328.016	362.28	390.915	384.215	336.325	395.469	401.705	375.739	426.645
A0A087WNU5	Ankyrin-3 (Fragment) OS=Mus musculus GN=Ank3 PE=1 SV=1	371.6	366.62	385.012	374.352	364.377	373.125	386.846	368.147	382.826
A0A087WNW8	CLIP-associating protein 1 OS=Mus musculus GN=Clasp1 PE=1 SV=2	352.266	387.791	390.011	387.631	380.657	378.448	362.801	372.001	359.853
A0A087WP33	Autophagy-related protein 9 (Fragment) OS=Mus musculus GN=Atg9a PE=1 SV=1	339.894	383.602	457.466	378.542	283.511	380.335	355.802	378.687	415.592
A0A087WP80	Limbic system-associated membrane protein OS=Mus musculus GN=Lsamp PE=1 SV=1	401.69	365.243	359.523	376.143	395.846	362.138	362.18	366.387	369.054
A0A087WPD1	Regulator of G-protein-signaling 6 OS=Mus musculus GN=Rgs6 PE=1 SV=1	381.84	356.769	375.443	368.759	405.573	352.125	374.689	368.778	378.913
A0A087WPR1	Myelin-associated glycoprotein OS=Mus musculus GN=Mag PE=1 SV=1	368.489	351.927	403.623	397.524	368.281	352.882	393.093	361.631	378.905
A0A087WPX3	Neurofascin OS=Mus musculus GN=Nfasc PE=1 SV=1	354.083	367.24	352.769	412.047	370.638	361.867	410.699	365.892	408.42
A0A087WQ31	CLIP-associating protein 1 OS=Mus musculus GN=Clasp1 PE=1 SV=1	353.855	391.994	390.455	386.192	378.588	379.329	362.965	371.992	354.547
A0A087WQ44	Snf2-related CREBBP activator protein OS=Mus musculus GN=Srcap PE=1 SV=1	402.668	420.565	423.337	357.447	387.831	362.448	297.317	353.488	309.216
A0A087WQE8	Kinesin-like protein KIF1A OS=Mus musculus GN=Kif1a PE=1 SV=1	362.629	377.588	357.233	369.883	376.315	374.964	409.985	379.377	376.953
A0A087WQS2	Basic leucine zipper and W2 domain-containing protein 1 OS=Mus musculus GN=Bzw1 PE=1 SV=1	361.273	276.385	372.685	363.389	487.95	399.367	311.574	345.981	436.036
A0A087WQS3	RAB6-interacting golgin OS=Mus musculus GN=Gorab PE=1 SV=1	290.423	349.127	341.737	467.55	401.799	319.413	486.366	379.52	423.928
A0A087WQV4	Maturin OS=Mus musculus GN=Mturn PE=1 SV=1	344.74	354.387	361.744	424.199	332.024	359.151	463.314	421.22	362.362
A0A087WR52	Arf-GAP domain and FG repeat-containing protein 1 (Fragment) OS=Mus musculus GN=Agfg1 PE=1 SV=1	358.662	376.221	372.421	410.69	349.761	408.374	344.396	366.803	395.341
A0A087WRM7	6-phosphofructo-2-kinase/fructose-2,6-bisphosphatase 2 OS=Mus musculus GN=Pfkfb2 PE=1 SV=1	385.451	362.519	350.888	347.991	368.338	361.51	429.913	417.222	355.018
A0A087WRN5	Uncharacterized protein OS=Mus musculus GN=Gm13889 PE=1 SV=1	355.322	416.181	389.597	434.434	327.021	398.173	331.48	382.549	344.269
A0A087WRS3	Abl interactor 2 OS=Mus musculus GN=Abi2 PE=1 SV=1	324.754	375.261	392.287	365.443	374.114	418.333	353.773	395.215	378.539
A0A087WS23	Kinectin OS=Mus musculus GN=Ktn1 PE=1 SV=1	389.089	363.012	391.501	394.026	364.118	366.091	342.614	359.624	390.747
A0A087WS83	Voltage-dependent R-type calcium channel subunit alpha OS=Mus musculus GN=Cacna1e PE=1 SV=1	357.172	374.068	378.7	372.479	357.879	383.606	393.751	379.541	384.649
A0A087WSB8	High mobility group nucleosome-binding domain-containing protein 3 OS=Mus musculus GN=Hmgn3 PE=1 SV=1	437.079	289.037	471.51	448.187	353.288	304.062	302.55	315.467	412.98
A0A087WSF5	Leucine-rich repeat flightless-interacting protein 1 (Fragment) OS=Mus musculus GN=Lrrfip1 PE=1 SV=1	364.042	372.833	383.611	384.376	419.028	391.543	323.679	352.319	363.346
A0A087WSM1	Islet cell autoantigen 1-like protein OS=Mus musculus GN=Ica1l PE=1 SV=1	378.278	431.399	447.485	390.205	296.569	376.58	302.619	366.771	352.01
A0A087WSP5	Signal transducer and activator of transcription OS=Mus musculus GN=Stat1 PE=1 SV=1	331.293	396.19	367.485	363.96	315.591	441.487	386.609	404.378	388.49
A0A087WSS1	RIKEN cDNA 2310035C23 gene OS=Mus musculus GN=2310035C23Rik PE=1 SV=1	376.725	361.892	419.468	342.111	401.058	413.216	307.93	378.719	326.493
A0A0A0MQ68	Glutaryl-CoA dehydrogenase, mitochondrial OS=Mus musculus GN=Gcdh PE=1 SV=1	295.68	321.504	377.708	430.582	329.123	361.599	424.444	379.696	526.308
A0A0A0MQ73	Histone-lysine N-methyltransferase OS=Mus musculus GN=Kmt2d PE=1 SV=1	380.958	358.019	391.541	355.468	370.563	355.494	435.219	289.202	438.444
A0A0A0MQ89	Actin-related protein 5 OS=Mus musculus GN=Actr5 PE=1 SV=1	313.07	415.378	327.362	368.692	322.433	412.733	384.47	418.617	455.945
A0A0A0MQ90	Protein S100-A13 OS=Mus musculus GN=S100a13 PE=1 SV=1	351.11	361.753	362.815	407.414	362.928	477.209	343.668	381.578	331.324
A0A0A0MQ92	Teneurin-2 OS=Mus musculus GN=Tenm2 PE=1 SV=1	321.067	339.937	382.356	398.011	362.898	394.3	386.072	378.673	442.5
A0A0A0MQ93	Transmembrane protein 132E OS=Mus musculus GN=Tmem132e PE=1 SV=1	400.845	387.355	406.599	384.075	367.272	357.231	335.993	353.21	350.162
A0A0A0MQ99	DNA repair protein SWI5 homolog OS=Mus musculus GN=Swi5 PE=1 SV=1	395.225	418.559	303.158	406.683	300.878	341.682	557.517	361.067	346.032
A0A0A0MQA3	Alpha-1-antitrypsin 1-1 OS=Mus musculus GN=Serpina1a PE=1 SV=1	419.958	400.634	412.253	346.123	342.288	310.767	394.105	356.423	358.742
A0A0A0MQA5	Tubulin alpha chain (Fragment) OS=Mus musculus GN=Tuba4a PE=1 SV=1	370.54	399.587	369.879	384.441	362.386	373.662	388.655	371.796	354.746
A0A0A0MQC6	RIKEN cDNA 5330417C22 gene OS=Mus musculus GN=5330417C22Rik PE=1 SV=1	309.227	368.066	409.769	414.83	307.508	409.775	331.854	374.338	478.747
A0A0A0MQD1	Tudor domain-containing protein 7 OS=Mus musculus GN=Tdrd7 PE=1 SV=1	362.21	370.63	386.656	339.483	355.068	394.715	362.633	409.191	384.468
A0A0A0MQD5	SH3 and multiple ankyrin repeat domains protein 3 OS=Mus musculus GN=Shank3 PE=1 SV=1	343.15	375.981	382.977	388.124	359.582	411.989	372.033	383.703	365.234
A0A0A0MQD7	Ral GTPase-activating protein subunit alpha-2 OS=Mus musculus GN=Ralgapa2 PE=1 SV=1	313.114	369.906	385.59	402.093	359.307	332.516	441.902	405.977	407.979
A0A0A0MQE5	Calmodulin-regulated spectrin-associated protein 1 OS=Mus musculus GN=Camsap1 PE=1 SV=1	346.151	410.713	397.942	396.066	340.771	403.767	340.903	386.137	349.663
A0A0A0MQF5	OTU domain-containing protein 6B OS=Mus musculus GN=Otud6b PE=1 SV=1	390.486	356.245	313.596	397.039	374.874	340.796	451.621	386.245	394.356
A0A0A0MQF6	Glyceraldehyde-3-phosphate dehydrogenase OS=Mus musculus GN=Gapdh PE=1 SV=1	383.022	366.52	362.437	385.725	384.548	376.927	374.557	363.529	373.578
A0A0A0MQN4	Ubiquitin-like modifier-activating enzyme ATG7 OS=Mus musculus GN=Atg7 PE=1 SV=1	382.078	375.215	342.268	351.748	400.754	375.718	407.394	376.242	360.361
A0A0A6YVS2	Calcium load-activated calcium channel (Fragment) OS=Mus musculus GN=Tmco1 PE=1 SV=1	344.855	406.816	415.294	415.579	324.261	370.963	379.835	373.447	352.714
A0A0A6YVS6	Ras/Rap GTPase-activating protein SynGAP (Fragment) OS=Mus musculus GN=Syngap1 PE=1 SV=2	347.985	354.593	384.859	377.182	387.012	379.446	375.735	377.809	394.833
A0A0A6YVU8	MCG119397 OS=Mus musculus GN=Gm9774 PE=4 SV=1	628.619	377.733	315.247	287.696	546.477	245.571	299.404	301.06	211.517
A0A0A6YW53	Mitogen-activated protein kinase kinase kinase kinase 4 OS=Mus musculus GN=Map4k4 PE=1 SV=1	414.481	311.11	406.717	363.562	445.136	358.58	335.916	326.61	365.456
A0A0A6YWG7	Rap guanine nucleotide exchange factor 2 OS=Mus musculus GN=Rapgef2 PE=1 SV=1	385.997	361.472	392.946	367.913	362.966	382.154	363.272	367.225	374.495
A0A0A6YWL7	Tyrosine-protein kinase receptor OS=Mus musculus GN=Ntrk3 PE=1 SV=1	400.649	386.166	384.414	349.124	346.346	336.768	406.65	371.064	380.641
A0A0A6YWR2	Ig gamma-1 chain C region secreted form (Fragment) OS=Mus musculus GN=Ighg1 PE=1 SV=1	344.53	263.423	566.048	368.25	279.926	194.982	283.053	671.623	375.314
A0A0A6YWT1	Formin-binding protein 1 (Fragment) OS=Mus musculus GN=Fnbp1 PE=1 SV=1	370.35	369.623	396.703	345.066	407.391	374.125	360.852	373.292	351.849
A0A0A6YX26	60S ribosomal protein L31 OS=Mus musculus GN=Rpl31 PE=1 SV=1	330.716	393.075	387.811	383.301	373.735	368.354	319.185	434.377	385.308
A0A0A6YX40	Immunoglobulin superfamily member 3 OS=Mus musculus GN=Igsf3 PE=1 SV=1	345.03	385.389	348.371	421.11	338.713	396.081	436.779	375.45	368.065
A0A0A6YX42	Ubiquitin carboxyl-terminal hydrolase 19 (Fragment) OS=Mus musculus GN=Usp19 PE=1 SV=1	375.717	367.382	358.99	418.703	373.61	400.161	315.259	405.839	355.568
A0A0A6YXH3	Oxysterol-binding protein OS=Mus musculus GN=Osbpl9 PE=1 SV=1	377.63	367.06	368.262	362.256	386.158	372.744	385.674	339.195	411.232
A0A0A6YXJ9	Immunoglobulin heavy variable V1-12 (Fragment) OS=Mus musculus GN=Ighv1-12 PE=4 SV=1	290.222	234.79	400.622	397.286	351.264	355.118	250.433	296.749	850.698
A0A0A6YXK7	Centrosomal protein of 170 kDa (Fragment) OS=Mus musculus GN=Cep170 PE=1 SV=1	372.674	353.488	394.806	413.891	366.526	381.782	343.252	354.159	390.27
A0A0A6YY91	Neural cell adhesion molecule 1 (Fragment) OS=Mus musculus GN=Ncam1 PE=1 SV=1	400.701	345.267	380.363	381.654	379.073	379.488	368.233	361.621	361.706
A0A0B4J1E2	SNW domain-containing protein 1 OS=Mus musculus GN=Snw1 PE=1 SV=1	386.126	370.374	372.636	399.499	373.208	354.902	356.727	376.537	379.367
A0A0B4J1E7	Importin subunit alpha-3 OS=Mus musculus GN=Kpna4 PE=1 SV=1	369.693	377.047	348.512	365.401	387.488	372.242	417.261	393.682	350.466
A0A0D2X7Z2	Protein-lysine N-methyltransferase N6AMT2 OS=Mus musculus GN=Eef1akmt1 PE=1 SV=1	416.694	481.644	330.743	384.45	427.917	262.167	379.923	352.741	313.589
A0A0F6AIX5	Lipid droplet-associated hydrolase OS=Mus musculus GN=Ldah PE=1 SV=1	403.109	386.514	344.691	370.252	408.314	334.571	387.561	366.286	360.817
A0A0G2JDI1	Immunoglobulin kappa joining 5 (Fragment) OS=Mus musculus GN=Igkj5 PE=4 SV=1	358.198	377.245	349.237	400.738	383.448	393.955	390.201	380.672	355.072
A0A0G2JE00	Membrane-associated guanylate kinase, WW and PDZ domain-containing protein 2 OS=Mus musculus GN=Magi2 PE=1 SV=1	343.824	371.454	348.028	384.547	404.506	408.12	370.863	391.97	361.667
A0A0G2JEG8	Amphiphysin OS=Mus musculus GN=Amph PE=1 SV=1	370.185	361.757	397.671	336.621	408.413	393.821	350.776	358.143	368.37
A0A0G2JEK2	Cysteine-rich protein 1 OS=Mus musculus GN=Crip1 PE=1 SV=1	535.197	386.223	350.068	323.457	442.181	294.785	252.898	354.844	323.864
A0A0G2JEX1	Nexilin OS=Mus musculus GN=Nexn PE=1 SV=1	394.23	375.004	350.425	333.848	371.155	405.257	360.343	382.709	383.678
A0A0G2JFT8	Protein RUFY3 OS=Mus musculus GN=Rufy3 PE=1 SV=1	378.94	372.051	370.707	367.229	376.304	373.648	372.689	377.56	378.059
A0A0G2JFV5	Leucine-rich repeat flightless-interacting protein 2 OS=Mus musculus GN=Lrrfip2 PE=1 SV=1	402.09	365.489	358.424	387.201	397.133	345.893	342.405	372.64	387.696
A0A0G2JG64	Neuronal acetylcholine receptor subunit beta-2 OS=Mus musculus GN=Chrnb2 PE=1 SV=1	403.646	358.482	420.338	341.557	520.177	367.345	180.547	330.439	353.382
A0A0G2JGM8	Adhesion G protein-coupled receptor L2 OS=Mus musculus GN=Adgrl2 PE=1 SV=1	315.938	369.114	364.469	416.408	343.096	386.355	413.808	396.747	415.944
A0A0G2JGQ4	NEDD8 ultimate buster 1 OS=Mus musculus GN=Nub1 PE=1 SV=1	389.837	324.45	409.32	357.987	407.2	411.16	293.074	348.026	391.272
A0A0G2JGQ6	Serine/threonine-protein kinase DCLK1 OS=Mus musculus GN=Dclk1 PE=1 SV=1	359.532	355.77	394.134	398.236	354.091	398.085	360.043	376.343	380.814
A0A0G2JGS4	Calcium/calmodulin-dependent protein kinase type II subunit delta OS=Mus musculus GN=Camk2d PE=1 SV=1	376.806	373.02	399.063	364.984	390.415	374.871	359.273	352.999	361.206
A0A0G2JGW6	Cyclin-dependent kinase-like 5 OS=Mus musculus GN=Cdkl5 PE=1 SV=1	337.654	367.61	404.76	397.203	343.419	405.367	342.137	393.141	389.26
A0A0G2JGW9	Far upstream element-binding protein 1 OS=Mus musculus GN=Fubp1 PE=1 SV=1	373.913	378.955	384.908	385.562	358.667	381.894	356.674	362.371	385.207
A0A0G2JGX4	Sodium/potassium-transporting ATPase subunit alpha OS=Mus musculus GN=Atp1a3 PE=1 SV=1	378.24	372.88	383.123	382.566	381.001	365.846	374.516	362.816	364.927
A0A0G2JH17	Integrator complex subunit 1 OS=Mus musculus GN=Ints1 PE=1 SV=1	330.395	394.287	383.688	426.259	277.023	351.972	435.087	325.188	507.235
A0A0G2LB90	Tubulin polyglutamylase TTLL7 OS=Mus musculus GN=Ttll7 PE=1 SV=1	291.382	439.003	374.363	476.699	311.771	333.918	393.797	391.023	428.341
A0A0J9YQM4	E3 ubiquitin-protein ligase RNF187 OS=Mus musculus GN=Rnf187 PE=1 SV=1	436.534	387.881	309.547	372.08	541.479	289.282	359.412	319.577	314.093
A0A0J9YTS6	Regulator of G-protein-signaling 6 (Fragment) OS=Mus musculus GN=Rgs6 PE=1 SV=1	405.346	362.675	385.945	340.482	385.773	354.464	373.649	359.16	378.408
A0A0J9YTW6	Sodium channel protein OS=Mus musculus GN=Scn2a PE=1 SV=1	412.298	333.59	383.161	332.546	466.816	350.056	353.457	355.905	337.398
A0A0J9YUA8	Mediator of RNA polymerase II transcription subunit 13-like OS=Mus musculus GN=Med13l PE=1 SV=1	363.636	350.689	404.459	300.601	408.495	324.446	480.243	286.012	452.932
A0A0J9YUD5	Nucleoporin 205 OS=Mus musculus GN=Nup205 PE=1 SV=1	352.705	389.164	373.37	335.533	373.245	356.854	432.872	378.309	390.043
A0A0J9YUL3	Septin 11, isoform CRA_b OS=Mus musculus GN=Sept11 PE=1 SV=1	396.707	378.733	379.923	358.862	409.177	371.304	347.71	373.2	325.387
A0A0J9YUN4	Dynamin-1 OS=Mus musculus GN=Dnm1 PE=1 SV=1	399.033	372.536	367.533	373.865	395.259	366.822	371.572	363.747	345.384
A0A0J9YUQ8	Gelsolin (Fragment) OS=Mus musculus GN=Gsn PE=1 SV=1	392.545	369.602	411.218	376.725	346.809	382.331	364.086	368.192	340.513
A0A0J9YUX9	Huntingtin-interacting protein 1 (Fragment) OS=Mus musculus GN=Hip1 PE=1 SV=1	386.562	328.171	372.627	436.549	384.44	322.215	436.098	370.454	357.421
A0A0J9YVH8	Ras/Rap GTPase-activating protein SynGAP (Fragment) OS=Mus musculus GN=Syngap1 PE=1 SV=2	355.234	348.192	395.956	371.463	390.939	382.839	356.743	373.086	393.508
A0A0M3HEP2	Zinc finger E-box-binding homeobox 2 OS=Mus musculus GN=Zeb2 PE=1 SV=1	322.4	386.828	423.637	402.435	279.653	401.033	322.158	414.871	438.162
A0A0M3HEP7	Phospholipid-transporting ATPase OS=Mus musculus GN=Atp8a1 PE=1 SV=1	407.263	364.142	365.894	323.686	455.349	392.447	345.675	364.282	305.196
A0A0M3HEQ0	Thioredoxin reductase 2, mitochondrial OS=Mus musculus GN=Txnrd2 PE=1 SV=1	365.783	398.137	367.743	360.149	331.571	391.562	382.19	392.439	389.168
A0A0N4SUH8	NFU1 iron-sulfur cluster scaffold homolog, mitochondrial OS=Mus musculus GN=Nfu1 PE=1 SV=1	348.686	399.228	334.565	386.747	378.894	456.283	329.008	417.234	326.24
A0A0N4SUI7	RIKEN cDNA 2210013O21 gene OS=Mus musculus GN=2210013O21Rik PE=4 SV=1	448.245	463.08	441.118	223.131	292.194	294.366	361.775	417.03	350.268
A0A0N4SUM4	Neural cell adhesion molecule L1-like protein OS=Mus musculus GN=Chl1 PE=1 SV=1	354.542	389.45	396.433	395.179	338.191	410.494	360.181	369.679	360.962
A0A0N4SUT6	Uncharacterized protein OS=Mus musculus GN=Gm43951 PE=4 SV=1	339.055	364.889	376.522	393.331	362.011	363.91	406.804	387.732	405.526
A0A0N4SUZ3	U6 snRNA-associated Sm-like protein LSm8 OS=Mus musculus GN=Lsm8 PE=1 SV=1	363.814	373.158	277.861	451.941	393.208	325.569	530.659	390.591	339.644
A0A0N4SVB5	Proline-rich transmembrane protein 3 OS=Mus musculus GN=Prrt3 PE=1 SV=1	287.141	353.242	425.151	393.817	324.745	480.709	367.577	367.719	400.694
A0A0N4SVC4	Ethanolamine kinase 1 OS=Mus musculus GN=Etnk1 PE=1 SV=1	357.285	434.248	415.197	352.935	367.829	344.912	383.019	407.734	290.106
A0A0N4SVL0	Eukaryotic translation initiation factor 4 gamma 3 OS=Mus musculus GN=Eif4g3 PE=1 SV=1	193.962	367.064	417.391	453.035	450.994	440.955	442.128	423.837	250.516
A0A0N4SVP8	Predicted pseudogene 5580 OS=Mus musculus GN=Gm5580 PE=3 SV=1	358.579	368.788	371.946	352.198	377.222	345.729	437.604	355.374	420.666
A0A0N4SW28	Guanine nucleotide-binding protein subunit gamma OS=Mus musculus GN=Gng12 PE=1 SV=1	343.2	395.997	390.611	355.477	392.884	418.297	321.977	421.166	313.823
A0A0N4SW73	Rab11 family-interacting protein 5 OS=Mus musculus GN=Rab11fip5 PE=1 SV=1	303.733	363.133	398.777	420.344	323.055	406.472	381.515	367.934	451.401
A0A0N4SW93	C2 domain-containing protein 5 OS=Mus musculus GN=C2cd5 PE=1 SV=1	347.999	340.29	367.99	416.755	357.17	400.662	396.788	378.691	396.18
A0A0N4SWG4	Phosphodiesterase OS=Mus musculus GN=Pde1c PE=1 SV=1	429.174	395.465	359.23	335.085	384.852	384.151	322.814	391.392	323.463
A0A0R3P9C4	Small integral membrane protein 4 OS=Mus musculus GN=Smim4 PE=1 SV=1	284.403	343.129	411.84	393.674	358.772	353.214	388.427	411.513	471.739
A0A0R3P9D0	Phospholipid phosphatase-related protein type 3 OS=Mus musculus GN=Plppr3 PE=1 SV=1	311.802	358.483	364.773	413.623	323.436	383.833	504.778	375.436	407.255
A0A0R4IZW7	tRNA (guanine(26)-N(2))-dimethyltransferase OS=Mus musculus GN=Trmt1 PE=1 SV=1	398.911	385.123	357.448	378.82	395.988	342.226	351.973	390.803	355.917
A0A0R4IZW8	Calpain small subunit 1 OS=Mus musculus GN=Capns1 PE=1 SV=1	430.344	413.707	340.426	314.509	402.183	365.679	352.674	393.787	314.143
A0A0R4IZW9	Stromal cell-derived factor 2 OS=Mus musculus GN=Sdf2 PE=1 SV=1	325.096	347.335	428.205	360.769	385.012	286.442	480.746	382.718	401.973
A0A0R4IZX2	Na(+)/H(+) exchange regulatory cofactor NHE-RF OS=Mus musculus GN=Slc9a3r2 PE=1 SV=1	330.023	374.966	370.865	410.361	351.976	414.733	389.208	379.837	380.133
A0A0R4IZX5	Neurocan core protein OS=Mus musculus GN=Ncan PE=1 SV=1	351.134	368.325	394.953	389.615	353.337	403.039	375.141	378.278	365.079
A0A0R4IZY0	Thimet oligopeptidase OS=Mus musculus GN=Thop1 PE=1 SV=1	411.031	374.014	383.306	370.886	394.016	370.472	343.807	359.26	332.358
A0A0R4IZY9	tRNA-dihydrouridine(47) synthase [NAD(P)(+)] OS=Mus musculus GN=Dus3l PE=1 SV=1	392.052	356.68	365.9	367.021	381.129	323.711	418.303	362.808	408.918
A0A0R4IZZ1	Amyloid beta (A4)-like protein 1 OS=Mus musculus GN=Aplp1 PE=1 SV=1	351.301	378.591	350.036	307.087	386.015	379.139	419.02	374.812	435.524
A0A0R4J000	BTB/POZ domain-containing protein KCTD5 OS=Mus musculus GN=Kctd5 PE=1 SV=1	249.879	270.27	469.612	500.213	300.995	401.549	379.491	340.364	541.064
A0A0R4J003	VIP peptides OS=Mus musculus GN=Vip PE=3 SV=1	299.185	364.045	430.492	283.156	374.549	379.414	488.809	381.031	386.761
A0A0R4J007	Paladin OS=Mus musculus GN=Pald1 PE=1 SV=1	341.284	406.598	328.789	369.807	324.995	382.273	490.245	349.648	432.047
A0A0R4J008	Histone deacetylase OS=Mus musculus GN=Hdac2 PE=1 SV=1	361.762	427.721	394.801	382.211	329.185	380.14	347.13	406.326	336.215
A0A0R4J009	Actin-related protein 6 OS=Mus musculus GN=Actr6 PE=1 SV=1	437.019	405.33	383.477	402.694	300.492	371.168	313.114	358.514	372.656
A0A0R4J018	Thiopurine S-methyltransferase OS=Mus musculus GN=Tpmt PE=1 SV=1	357.108	385.884	392.631	289.693	390.539	372.554	370.744	384.921	406.64
A0A0R4J023	Methylglutaconyl-CoA hydratase, mitochondrial OS=Mus musculus GN=Auh PE=1 SV=1	353.79	354.698	346.229	380.945	373.584	366.176	416.369	372.241	438.519
A0A0R4J036	Neurofilament 3, medium OS=Mus musculus GN=Nefm PE=1 SV=1	400.88	353.349	377.808	388.658	392.273	363.258	376.327	335.129	372.203
A0A0R4J038	Kininogen-1 OS=Mus musculus GN=Kng1 PE=1 SV=1	393.235	385.569	363.486	360.251	306.495	344.364	442.606	372.195	421.063
A0A0R4J039	Histidine-rich glycoprotein OS=Mus musculus GN=Hrg PE=1 SV=1	518.373	372.032	328.971	269.457	442.992	261.216	565.806	284.446	278.957
A0A0R4J040	Bifunctional apoptosis regulator OS=Mus musculus GN=Bfar PE=1 SV=1	296.381	373.76	366.42	356.707	353.414	421.022	475.033	391.502	387.789
A0A0R4J041	N6-adenosine-methyltransferase subunit METTL3 OS=Mus musculus GN=Mettl3 PE=1 SV=1	303.301	354.338	341.55	416.951	345.19	379.847	445.392	393.476	464.503
A0A0R4J044	Poly(rC)-binding protein 4 OS=Mus musculus GN=Pcbp4 PE=1 SV=1	376.874	417.549	345.978	432.91	378.536	375.491	354.711	416.057	277.537
A0A0R4J049	Protein arginine N-methyltransferase 5 OS=Mus musculus GN=Prmt5 PE=1 SV=1	360.304	354.959	351.139	335.85	403.762	378.005	404.362	403.063	386.279
A0A0R4J050	Aminoacylase OS=Mus musculus GN=Acy1 PE=1 SV=1	386.062	355.084	359.193	394.144	370.779	339.58	416.145	359.636	406.871
A0A0R4J065	Cysteine protease OS=Mus musculus GN=Atg4b PE=1 SV=1	389.866	400.247	342.401	369.055	395.966	374.596	377.897	382.196	331.121
A0A0R4J069	Selenocysteine lyase OS=Mus musculus GN=Scly PE=1 SV=1	405.088	401.314	315.405	367.822	412.162	312.955	461.72	363.143	341.357
A0A0R4J078	UBX domain containing 2, isoform CRA_a OS=Mus musculus GN=Ubxn4 PE=1 SV=1	367.155	366.38	366.35	364.452	366.181	359.864	400.941	384.904	406.766
A0A0R4J079	Acyl-Coenzyme A binding domain containing 3, isoform CRA_b OS=Mus musculus GN=Acbd3 PE=1 SV=1	398.272	375.161	379.016	418.748	365.189	380.395	330.113	382.367	328.806
A0A0R4J081	Complex I intermediate-associated protein 30, mitochondrial OS=Mus musculus GN=Ndufaf1 PE=1 SV=1	412.019	387.51	423.251	308.829	402.485	351.501	343.421	348.828	333.379
A0A0R4J083	Long-chain-specific acyl-CoA dehydrogenase, mitochondrial OS=Mus musculus GN=Acadl PE=1 SV=1	403.009	329.901	361.046	398.21	385.455	355.259	379.196	354.812	406.103
A0A0R4J088	Tissue factor OS=Mus musculus GN=F3 PE=1 SV=1	382.938	359.311	342.711	405.327	369.246	389.642	335.557	384.358	410.029
A0A0R4J092	Beta-mannosidase OS=Mus musculus GN=Manba PE=1 SV=1	352.615	331.093	367.815	532.937	337.815	315.932	378.999	365.745	451.539
A0A0R4J094	Fumarylacetoacetate hydrolase domain-containing 2A OS=Mus musculus GN=Fahd2a PE=1 SV=1	422.323	383.911	367.494	374.828	386.86	356.767	317.287	385.027	342.514
A0A0R4J098	Zinc finger protein 326 OS=Mus musculus GN=Zfp326 PE=1 SV=1	395.544	348.686	414.242	412.148	421.5	364.051	267.322	368.468	338.019
A0A0R4J099	RIKEN cDNA 2210016L21 gene OS=Mus musculus GN=2210016L21Rik PE=1 SV=1	335.7	394.844	447.569	390.58	347.273	409.666	307.868	381.872	338.36
A0A0R4J0A6	Solute carrier family 17 (Sodium-dependent inorganic phosphate cotransporter), member 6, isoform CRA_a OS=Mus musculus GN=Slc17a6 PE=1 SV=1	428.922	374.886	425.703	340.343	375.514	405.627	294.118	372.21	284.061
A0A0R4J0B4	Cytidine monophospho-N-acetylneuraminic acid synthetase OS=Mus musculus GN=Cmas PE=1 SV=1	345.579	358.124	379.639	378.478	385.575	407.183	367.368	400.495	354.591
A0A0R4J0B5	CDNA sequence BC017158 OS=Mus musculus GN=BC017158 PE=1 SV=1	301.754	379.075	334.084	445.069	355.999	329.789	495.544	381.417	436.42
A0A0R4J0B8	Endophilin-A3 OS=Mus musculus GN=Sh3gl3 PE=1 SV=1	370.585	367.915	367.319	377.177	367.565	377.185	386.611	384.038	380.008
A0A0R4J0D1	Store-operated calcium entry-associated regulatory factor OS=Mus musculus GN=Saraf PE=1 SV=1	330.738	372.338	340.541	384.755	351.021	370.253	474.472	368.045	434.929
A0A0R4J0D3	Dolichyl-diphosphooligosaccharide--protein glycosyltransferase subunit STT3B OS=Mus musculus GN=Stt3b PE=1 SV=1	342.915	253.315	456.522	451.874	361.428	344.631	310.015	315.178	553.723
A0A0R4J0D5	Vacuolar fusion protein MON1 homolog A OS=Mus musculus GN=Mon1a PE=1 SV=1	295.969	369.025	273.732	425.374	427.316	491.991	360.968	382.476	402.236
A0A0R4J0E4	Integrator complex subunit 7 OS=Mus musculus GN=Ints7 PE=1 SV=1	443.788	373.792	383.857	319.05	371.404	358.82	348.242	383.09	337.759
A0A0R4J0F6	Cyclin-G-associated kinase OS=Mus musculus GN=Gak PE=1 SV=1	359.442	385.112	392.87	361.153	347.171	388.531	363.034	380.422	391.628
A0A0R4J0G0	Phosphoenolpyruvate carboxykinase [GTP], mitochondrial OS=Mus musculus GN=Pck2 PE=1 SV=1	389.774	358.021	357.15	386.263	372.522	384.856	382.834	393.915	347.159
A0A0R4J0G4	Ran-binding protein 10 OS=Mus musculus GN=Ranbp10 PE=1 SV=1	368.832	355.198	352.065	385.044	414.507	371.779	384.819	374.384	371.457
A0A0R4J0G6	Glutaminyl-peptide cyclotransferase OS=Mus musculus GN=Qpct PE=1 SV=1	313.895	331.434	349.208	459.52	339.469	361.782	491.384	369.459	441.843
A0A0R4J0I0	ETS domain-containing transcription factor ERF OS=Mus musculus GN=Erf PE=1 SV=1	296.267	407.945	376.126	383.623	310.776	416.568	415.062	399.394	413.879
A0A0R4J0I1	MCG1051009 OS=Mus musculus GN=Serpina3k PE=1 SV=1	523.13	363.734	400.493	310.722	402.55	221.535	412.201	274.305	386.984
A0A0R4J0I6	Acyl-CoA dehydrogenase family member 11 OS=Mus musculus GN=Acad11 PE=1 SV=1	176.455	376.886	300.353	415.352	280.082	443.021	586.159	440.882	527.04
A0A0R4J0I9	Low density lipoprotein receptor-related protein 1 OS=Mus musculus GN=Lrp1 PE=1 SV=1	366.533	379.175	375.374	381.913	369.133	388.861	377.594	380.717	354.073
A0A0R4J0J0	Palmdelphin OS=Mus musculus GN=Palmd PE=1 SV=1	443.61	364.84	337.022	349.213	432.303	406.968	284.085	389.3	307.691
A0A0R4J0J1	Copine-9 OS=Mus musculus GN=Cpne9 PE=1 SV=1	381.807	385.626	341.029	371.649	373.235	369.376	373.958	390.123	389.562
A0A0R4J0J8	Cytospin-A OS=Mus musculus GN=Specc1l PE=1 SV=1	361.175	365.99	450.661	383.135	326.12	385.208	333.439	370.079	379.511
A0A0R4J0K0	Sprouty-related, EVH1 domain-containing protein 3 OS=Mus musculus GN=Spred3 PE=1 SV=1	387.42	399.954	393.45	351.488	389.073	298.313	352.35	377.967	399.827
A0A0R4J0K1	Selenoprotein F OS=Mus musculus GN=Selenof PE=1 SV=1	385.823	385.483	339.525	355.129	319.522	353.304	420.01	432.642	399.754
A0A0R4J0L5	Conserved oligomeric Golgi complex subunit 6 OS=Mus musculus GN=Cog6 PE=1 SV=1	444.409	456.606	354.745	280.153	494.251	333.906	390.003	292.834	245.719
A0A0R4J0L6	28S ribosomal protein S35, mitochondrial OS=Mus musculus GN=Mrps35 PE=1 SV=1	322.034	378.933	379.542	427.162	305.421	395.968	386.734	413.333	407.563
A0A0R4J0M1	Tubulin-specific chaperone C OS=Mus musculus GN=Tbcc PE=1 SV=1	429.266	386.588	367.123	337.719	385.748	350.238	366.442	345.17	368.191
A0A0R4J0M7	Expressed sequence AI851790 OS=Mus musculus GN=Fam19a2 PE=1 SV=1	403.31	347.95	381.624	368.538	389.681	388.303	366.608	386.048	316.4
A0A0R4J0M9	Deubiquitinating protein VCIP135 OS=Mus musculus GN=Vcpip1 PE=1 SV=1	352.833	360.937	399.072	371.476	377.778	396.605	355.88	382.378	369.784
A0A0R4J0N5	Programmed cell death 2, isoform CRA_b OS=Mus musculus GN=Pdcd2 PE=1 SV=1	401.844	353.074	455.54	434.35	307.98	402.65	305.807	356.226	325.11
A0A0R4J0P1	Acyl-Coenzyme A dehydrogenase family, member 8 OS=Mus musculus GN=Acad8 PE=1 SV=1	425.11	347.736	355.927	388.816	385.954	328.561	385.213	359.103	386.133
A0A0R4J0P6	Poly(A)-specific ribonuclease PARN OS=Mus musculus GN=Parn PE=1 SV=1	256.928	315.284	315.358	470.525	274.688	397.011	584.086	452.91	457.942
A0A0R4J0Q5	Lamin-B2 OS=Mus musculus GN=Lmnb2 PE=1 SV=1	419.879	370.03	329.784	383.639	390.488	328.404	408.041	359.676	382.543
A0A0R4J0Q6	E3 ubiquitin-protein ligase TRIM56 OS=Mus musculus GN=Trim56 PE=1 SV=1	356.619	421.744	375.239	333.799	333.036	363.322	389.131	370.378	433.935
A0A0R4J0Q9	Conserved oligomeric Golgi complex subunit 7 OS=Mus musculus GN=Cog7 PE=1 SV=1	351.895	414.421	381.891	349.203	340.625	409.205	382.91	368.924	373.622
A0A0R4J0R4	N-acetylaspartate synthetase OS=Mus musculus GN=Nat8l PE=1 SV=1	361.383	367.175	431.367	352.163	381.205	350.442	365.939	335.851	408.467
A0A0R4J0S1	Cdc42 effector protein 1 OS=Mus musculus GN=Cdc42ep1 PE=1 SV=1	354.314	391.664	335.873	428.391	365.916	344.009	425.296	361.253	407.281
A0A0R4J0S3	Reticulon 4 interacting protein 1 OS=Mus musculus GN=Rtn4ip1 PE=1 SV=1	457.235	365.529	355.983	301.256	412.361	328.17	367.884	364.938	365.917
A0A0R4J0S4	Lethal(2) giant larvae protein homolog 1 OS=Mus musculus GN=Llgl1 PE=1 SV=1	385.952	361.09	347.597	407.186	369.665	357.158	400.645	382.659	376.13
A0A0R4J0T0	Iron-sulfur cluster co-chaperone protein HscB, mitochondrial OS=Mus musculus GN=Hscb PE=1 SV=1	355.025	366.732	353.087	374.424	352.6	368.649	417.286	392.379	419.848
A0A0R4J0T8	ADP-ribosylation factor GTPase-activating protein 3 OS=Mus musculus GN=Arfgap3 PE=1 SV=1	384.722	369.442	435.748	357.28	366.465	407.407	270.407	378.73	352.505
A0A0R4J0U2	Serine/threonine-protein phosphatase 4 regulatory subunit 2 OS=Mus musculus GN=Ppp4r2 PE=1 SV=1	354.12	460.218	375.367	317.37	392.944	340.88	339.532	365.254	405.045
A0A0R4J0U5	ATP-binding cassette sub-family D member 2 OS=Mus musculus GN=Abcd2 PE=1 SV=1	353.975	342.672	372.758	384.871	374.792	358.962	469.446	382.921	361.471
A0A0R4J0U7	COMM domain-containing protein 5 OS=Mus musculus GN=Commd5 PE=1 SV=1	318.701	339.998	369.069	383.648	329.18	455.654	524.95	378.719	328.83
A0A0R4J0V4	Junction-mediating and -regulatory protein OS=Mus musculus GN=Jmy PE=1 SV=1	296.75	356.493	292.637	497.405	375.134	313.081	556.838	363.13	445.199
A0A0R4J0W6	Leucine rich repeat containing 40, isoform CRA_a OS=Mus musculus GN=Lrrc40 PE=1 SV=1	408.282	383.682	362.69	375.945	369.541	361.508	346.994	383.52	361.852
A0A0R4J0W9	Exocyst complex component 3-like protein 4 OS=Mus musculus GN=Exoc3l4 PE=1 SV=1	338.957	350.912	404.547	429.74	364.688	344.563	374.962	395.771	390.425
A0A0R4J0Y3	Probable helicase with zinc finger domain OS=Mus musculus GN=Helz PE=1 SV=1	317.387	365.395	363.084	373.835	317.684	349.226	534.762	395.313	425.226
A0A0R4J0Z1	Protein disulfide-isomerase A4 OS=Mus musculus GN=Pdia4 PE=1 SV=1	376.309	356.884	405.393	365.885	410.133	373.839	332.974	356.979	366.641
A0A0R4J101	Anion exchange protein OS=Mus musculus GN=Slc4a2 PE=1 SV=1	409.056	364.784	332.624	410.03	350.471	364.114	406.107	346.506	404.533
A0A0R4J102	Cytoplasmic polyadenylation element-binding protein 3 OS=Mus musculus GN=Cpeb3 PE=1 SV=1	398.085	367.24	382.096	372.559	369.133	389.861	332.668	377.756	359.762
A0A0R4J104	Disabled homolog 2 OS=Mus musculus GN=Dab2 PE=1 SV=1	295.631	385.954	400.725	470.234	293.441	392.323	376.967	402.364	413.087
A0A0R4J117	Immunoglobulin superfamily member 8 OS=Mus musculus GN=Igsf8 PE=1 SV=1	360.183	369.089	346.7	406.666	348.69	373.623	437.314	368.046	398.671
A0A0R4J124	SRSF protein kinase 2 OS=Mus musculus GN=Srpk2 PE=1 SV=1	353.918	378.234	368.452	404.711	361.982	386.255	369.399	384.477	379.915
A0A0R4J138	Arylsulfatase B OS=Mus musculus GN=Arsb PE=1 SV=1	341.963	396.032	360.602	403.162	336.883	378.052	418.582	407.325	363.029
A0A0R4J140	Clustered mitochondria protein homolog OS=Mus musculus GN=Cluh PE=1 SV=1	388.592	406.803	390.111	318.059	370.236	368.202	345.638	379.664	371.67
A0A0R4J170	Transcription activator BRG1 OS=Mus musculus GN=Smarca4 PE=1 SV=1	374.034	381.253	358.411	371.125	397.4	385.2	355.911	383.333	357.761
A0A0R4J172	DENN domain-containing protein 4B OS=Mus musculus GN=Dennd4b PE=1 SV=1	374.642	362.78	321.473	431.715	355.518	403.701	370.365	405.094	375.263
A0A0R4J174	Evolutionarily conserved-signaling intermediate in Toll pathway, mitochondrial OS=Mus musculus GN=Ecsit PE=1 SV=1	369.091	397.935	361.761	380.545	382.013	380.634	368.791	373.937	356.135
A0A0R4J187	X-ray repair cross-complementing protein 6 OS=Mus musculus GN=Xrcc6 PE=1 SV=1	481.133	331.8	379.734	359.931	339.417	441.433	240.516	395.851	329.518
A0A0R4J1C5	ATP synthase mitochondrial F1 complex assembly factor 2 OS=Mus musculus GN=Atpaf2 PE=1 SV=1	392.647	384.302	358.448	405.109	365.332	374.004	385.062	376.108	332.313
A0A0R4J1E2	Elongation factor 1-delta OS=Mus musculus GN=Eef1d PE=1 SV=1	363.901	380.543	354.395	397.509	384.231	375.728	385.959	367.001	375.614
A0A0R4J1E4	SPARC-related modular calcium-binding protein 1 OS=Mus musculus GN=Smoc1 PE=1 SV=1	337.511	334.79	465.03	485.478	345.219	355.795	345.49	370.695	344.78
A0A0R4J1F5	Ubiquitin carboxyl-terminal hydrolase 21 OS=Mus musculus GN=Usp21 PE=3 SV=1	122.859	328.494	400.441	367.649	221.366	419.702	530.446	426.011	729.605
A0A0R4J1G5	Erlin-1 OS=Mus musculus GN=Erlin1 PE=1 SV=1	381.239	363.966	385.926	365.837	357.928	380.918	363.577	391.438	372.2
A0A0R4J1H2	Glycerate kinase OS=Mus musculus GN=Glyctk PE=1 SV=1	349.265	377.243	369.784	383.392	297.564	354.161	402.884	411.574	462.8
A0A0R4J1L3	Zinc finger protein with KRAB and SCAN domains 3 OS=Mus musculus GN=Zkscan3 PE=1 SV=1	360.946	353.045	322.562	480.545	404.494	334.868	347.843	373.448	434.234
A0A0R4J1N7	Ankyrin-1 OS=Mus musculus GN=Ank1 PE=1 SV=1	348.938	394.538	334.452	413.816	363.029	357.263	424.664	383.445	392.142
A0A0R4J1Q7	Ectonucleotide pyrophosphatase/phosphodiesterase 1, isoform CRA_a OS=Mus musculus GN=Enpp1 PE=1 SV=1	334.978	396.516	348.983	375.192	358.463	415.113	413.197	380.768	376.653
A0A0R4J1S2	PRP40 pre-mRNA processing factor 40 homolog B (Yeast) OS=Mus musculus GN=Prpf40b PE=1 SV=1	358.36	374.872	373.29	392.313	381.212	368.783	380.193	374.015	377.994
A0A0R4J1T4	Leucine-rich repeat transmembrane neuronal protein 4 OS=Mus musculus GN=Lrrtm4 PE=1 SV=1	369.612	424.319	293.897	287.835	421.409	467.632	266.274	470.372	336.929
A0A0R4J1W7	CDC23 (Cell division cycle 23, yeast, homolog), isoform CRA_c OS=Mus musculus GN=Cdc23 PE=1 SV=1	395.961	370.411	371.696	338.315	373.607	379.936	397.687	373.674	355.569
A0A0R4J1Y3	Probable tRNA N6-adenosine threonylcarbamoyltransferase OS=Mus musculus GN=Osgep PE=1 SV=1	396.535	370.225	418.647	346.701	422.269	345.587	362.431	361.532	304.043
A0A0R4J203	D-amino-acid oxidase OS=Mus musculus GN=Dao PE=1 SV=1	366.646	430.352	304.235	398.797	348.068	327.54	433.496	382.264	423.219
A0A0R4J215	G patch domain-containing protein 11 OS=Mus musculus GN=Gpatch11 PE=1 SV=1	504.929	357.336	318.392	403.534	408.753	315.525	370.543	301.8	352.753
A0A0R4J225	Bernardinelli-Seip congenital lipodystrophy 2 homolog (Human), isoform CRA_a OS=Mus musculus GN=Bscl2 PE=1 SV=1	344.007	359.54	446.62	313.465	335.733	426.621	356.931	373.956	393.94
A0A0R4J242	Chitinase domain-containing protein 1 OS=Mus musculus GN=Chid1 PE=1 SV=1	433.976	348.851	393.818	367.047	412.665	353.266	310.357	361.169	338.857
A0A0R4J250	Etoposide induced 2.4 mRNA OS=Mus musculus GN=Ei24 PE=1 SV=1	381.802	437.189	312.684	385.123	384.11	402.053	327.731	434.3	300.601
A0A0R4J254	Exportin-4 OS=Mus musculus GN=Xpo4 PE=1 SV=1	346.497	440.777	326.929	351.702	378.474	356.836	401.546	392.893	395.18
A0A0R4J263	1-acyl-sn-glycerol-3-phosphate acyltransferase OS=Mus musculus GN=Agpat1 PE=1 SV=1	364.809	408.936	386.072	377.676	339.01	373.443	369.528	378.65	374.452
A0A0R4J275	NADH dehydrogenase [ubiquinone] 1 alpha subcomplex subunit 12 OS=Mus musculus GN=Ndufa12 PE=1 SV=1	406.855	390.357	389.832	343.116	375.13	385.792	326.279	368.002	346.023
A0A0R4J2A1	Signal peptidase complex subunit 1 OS=Mus musculus GN=Spcs1 PE=1 SV=1	382.679	373.709	393.543	374.086	362.243	399.748	328.805	402.402	333.317
A0A0R4J2A2	Ankyrin repeat and sterile alpha motif domain-containing protein 1B OS=Mus musculus GN=Anks1b PE=1 SV=1	371.232	371.71	379.786	348.262	387.445	373.19	373.158	394.17	362.133
A0A0R4J2B2	BTB/POZ domain-containing protein KCTD12 OS=Mus musculus GN=Kctd12 PE=1 SV=1	380.444	357.941	344.154	408.579	421.604	371.898	360.351	381.67	346.584
A0A0R4J2C1	Amyloid beta A4 precursor protein-binding family B member 1 OS=Mus musculus GN=Apbb1 PE=1 SV=1	348.027	425.386	415.228	411.805	285.341	380.08	353.393	347.008	418.421
A0A0R4J2C2	Synaptotagmin II OS=Mus musculus GN=Syt2 PE=1 SV=1	392.52	398.885	374.3	358.986	379.303	386.207	362.048	392.843	303.165
A0A0U1RNF2	Leucine carboxyl methyltransferase 1 OS=Mus musculus GN=Lcmt1 PE=1 SV=1	372.103	371.603	376.202	379.811	376.14	370.912	372.179	357.595	395.547
A0A0U1RNL9	Myc-associated zinc finger protein OS=Mus musculus GN=Maz PE=1 SV=1	228.003	275.97	395.625	566.112	287.621	451.313	310.969	387.036	586.615
A0A0U1RP81	MICOS complex subunit MIC60 OS=Mus musculus GN=Immt PE=1 SV=1	403.465	360.123	376.466	374.27	377.853	357.705	357.924	351.001	397.716
A0A0U1RP94	Casein kinase I isoform gamma-1 OS=Mus musculus GN=Csnk1g1 PE=1 SV=1	438.972	418.377	361.822	327.119	441.926	380.067	287.074	373.042	268.511
A0A0U1RQ57	CDP-diacylglycerol--inositol 3-phosphatidyltransferase OS=Mus musculus GN=Cdipt PE=1 SV=1	390.549	352.553	393.816	359.944	364.216	311.296	475.499	344.561	387.673
A0A0X1KG62	Negative elongation factor B OS=Mus musculus GN=Nelfb PE=1 SV=1	392.36	361.306	380.065	369.941	359.805	354.581	394.227	368.92	387.387
A0A0X1KG67	ER membrane protein complex subunit 10 OS=Mus musculus GN=Emc10 PE=1 SV=1	372.481	368.977	315.233	436.663	403.928	346.807	426.509	370.3	367.011
A0A140LHG8	Signal peptidase complex subunit 2 OS=Mus musculus GN=Spcs2 PE=1 SV=1	444.916	395.103	413.03	402.785	364.426	366.294	254.477	353.767	313.331
A0A140LHN0	Protein YIF1B (Fragment) OS=Mus musculus GN=Yif1b PE=1 SV=1	351.636	397.215	362.173	407.946	297.959	342.731	446.421	386.565	426.569
A0A140LHU0	Disintegrin and metalloproteinase domain-containing protein 9 OS=Mus musculus GN=Adam9 PE=1 SV=1	430.267	231.116	453.884	395.593	381.512	370.966	262.605	321.906	477.457
A0A140LIF8	Immunity-related GTPase family M member 2 OS=Mus musculus GN=Irgm2 PE=1 SV=1	328.353	383.233	376.419	356.183	352.105	335.118	381.25	491.357	389.263
A0A140LIJ1	Protein FAM168A OS=Mus musculus GN=Fam168a PE=1 SV=1	316.201	389.96	436.15	357.106	373.582	428.134	374.305	301.194	391.005
A0A140LIU4	Cytochrome c oxidase subunit 7A1, mitochondrial OS=Mus musculus GN=Cox7a1 PE=1 SV=1	455.581	391.291	389.514	322.64	344.029	369.118	364.922	331.598	350.676
A0A140LIW3	FERM and PDZ domain-containing 3 OS=Mus musculus GN=Frmpd3 PE=1 SV=1	374.69	382.762	363.986	360.809	401.757	338.254	414.282	362.762	373.964
A0A140LIZ7	NHS-like protein 1 OS=Mus musculus GN=Nhsl1 PE=1 SV=1	392.453	400.766	377.807	384.993	355.966	349.142	374.805	366.054	362.243
A0A140LJ04	Zinc finger ZZ-type and EF-hand domain-containing protein 1 OS=Mus musculus GN=Zzef1 PE=1 SV=1	354.35	396.879	378.458	348.699	370.171	398.235	369.638	381.391	369.595
A0A140LJJ5	A-kinase anchor protein 13 OS=Mus musculus GN=Akap13 PE=1 SV=1	402.259	325.806	368.484	374.447	331.697	422.837	342.789	416.238	379.853
A0A140T8J4	Heme binding protein 1 OS=Mus musculus GN=Hebp1 PE=1 SV=1	385.375	373.485	365.764	368.205	367.051	418.216	348.283	373.945	359.221
A0A140T8M7	Uncharacterized protein OS=Mus musculus GN=Rpl23a-ps3 PE=3 SV=1	372.318	357.153	391.939	397.904	420.278	386.17	305.073	358.305	360.717
A0A140T8R4	N-acetylglucosamine-1-phosphotransferase subunit gamma OS=Mus musculus GN=Gnptg PE=1 SV=1	332.827	495.782	319.524	373.724	340.852	338.293	354.718	387.817	456.962
A0A140T8S5	Chromosome alignment-maintaining phosphoprotein 1 OS=Mus musculus GN=Champ1 PE=1 SV=2	377.644	396.434	334.755	422.429	345.079	375.034	403.445	372.562	371.092
A0A140T8T4	Uncharacterized protein OS=Mus musculus GN=Rpl9-ps6 PE=4 SV=1	411.109	379.553	335.821	342.85	410.888	362.386	424.299	348.437	344.441
A0A140T8U0	Uncharacterized protein OS=Mus musculus GN=Gad1-ps PE=3 SV=1	381.328	389.415	425.979	345.127	357.947	338.022	397.325	335.625	381.295
A0A140T8V3	Uncharacterized protein OS=Mus musculus GN=Vdac3-ps1 PE=4 SV=1	381.083	368.494	367.834	341.876	365.532	399.514	384.357	400.202	354.591
A0A140T8V5	Proliferating cell nuclear antigen OS=Mus musculus GN=Pcna-ps2 PE=3 SV=1	412.669	379.858	310.856	339.516	464.483	336.564	422.832	348.093	342.922
A0A171EBK8	Rap1 GTPase-activating protein 2 OS=Mus musculus GN=Rap1gap2 PE=1 SV=1	351.097	388.707	394.127	345.38	389.519	423.806	349.985	356.543	355.564
A0A1B0GR11	Transaldolase OS=Mus musculus GN=Taldo1 PE=1 SV=1	399.415	378.555	349.226	380.337	359.753	365.758	385.135	352.576	403.159
A0A1B0GR18	MOB kinase activator 2 OS=Mus musculus GN=Mob2 PE=1 SV=1	528.566	412.087	399.9	347.784	434.057	284.946	307.245	310.706	234.384
A0A1B0GR85	RIKEN cDNA 2900026A02 gene OS=Mus musculus GN=2900026A02Rik PE=1 SV=1	331.599	367.35	376.505	389.823	361.667	407.274	361.341	392.542	403.163
A0A1B0GRA5	Stromal interaction molecule 1 OS=Mus musculus GN=Stim1 PE=1 SV=1	344.722	333.96	410.678	384.626	364.606	428.13	344.229	353.386	408.391
A0A1B0GRB2	Cytohesin-2 OS=Mus musculus GN=Cyth2 PE=1 SV=1	335.78	397.838	332.343	408.088	353.335	394.671	419.539	383.275	390.699
A0A1B0GRC4	VPS10 domain-containing receptor SorCS1 OS=Mus musculus GN=Sorcs1 PE=1 SV=1	311.366	396.913	362.269	414.974	316.182	456.897	432.634	389.433	340.208
A0A1B0GRP7	Proline synthase co-transcribed bacterial homolog protein (Fragment) OS=Mus musculus GN=Prosc PE=1 SV=1	403.132	377.83	390.594	350.48	405.377	375.789	318.957	365.163	342.05
A0A1B0GRT6	Receptor-type tyrosine-protein phosphatase OS=Mus musculus GN=Ptpre PE=1 SV=1	362.428	384.969	358.009	318.429	433.194	402.886	365.746	382.483	343.407
A0A1B0GRU0	Vesicular glutamate transporter 1 OS=Mus musculus GN=Slc17a7 PE=1 SV=1	323.036	374.782	416.814	353.459	368.061	424.169	346.166	385.765	375.226
A0A1B0GRV0	3'(2'),5'-bisphosphate nucleotidase 1 OS=Mus musculus GN=Bpnt1 PE=1 SV=1	399.038	361.989	370.557	363.607	379.706	365.018	368.864	366.752	382.749
A0A1B0GS41	GRB2-associated-binding protein 1 OS=Mus musculus GN=Gab1 PE=1 SV=1	375.016	358.668	425.94	377.393	327.156	431.598	309.701	389.082	353.539
A0A1B0GS68	Uncharacterized protein OS=Mus musculus GN=Gm45713 PE=2 SV=1	361.414	413.864	387.675	386.132	348.05	415.592	338.674	386.856	324.177
A0A1B0GSA5	Phospholipase DDHD2 OS=Mus musculus GN=Ddhd2 PE=1 SV=1	349.955	400.9	389.803	400.424	280.32	369.004	389.155	376.178	445.967
A0A1B0GSG5	Ribonuclease inhibitor OS=Mus musculus GN=Rnh1 PE=1 SV=1	389.254	377.733	357.754	388.204	363.53	375.286	384.18	370.617	367.601
A0A1B0GSH8	Uncharacterized protein (Fragment) OS=Mus musculus GN=Gm45808 PE=4 SV=1	351.035	392.179	368.592	379.86	349.989	365.891	400.72	370.727	413.467
A0A1B0GSJ1	TELO2-interacting protein 2 OS=Mus musculus GN=Tti2 PE=1 SV=1	333.556	396.424	290.698	354.997	361.783	380.337	509.589	407.865	399.211
A0A1B0GSP1	Protein cornichon homolog 3 OS=Mus musculus GN=Cnih3 PE=4 SV=1	325.079	333.387	373.7	298.063	510.035	429.742	325.569	362.318	386.119
A0A1B0GSQ5	Histone deacetylase OS=Mus musculus GN=Hdac9 PE=1 SV=1	429.166	308.719	431.478	372.619	347.954	358.691	329.279	351.466	404.748
A0A1B0GSR5	Serine/threonine-protein kinase LMTK3 OS=Mus musculus GN=Lmtk3 PE=1 SV=1	328.229	386.431	365.345	391.999	346.624	409.282	383.275	394.888	394.49
A0A1B0GSU0	Aldehyde dehydrogenase family 16 member A1 OS=Mus musculus GN=Aldh16a1 PE=1 SV=1	395.333	399.613	398.519	400.778	384.42	380.074	289.614	382.37	304.061
A0A1B0GSX0	L-lactate dehydrogenase OS=Mus musculus GN=Ldha PE=1 SV=1	353.527	387.476	366.72	350.004	394.442	411.747	358.57	384.025	358.527
A0A1B0GSX7	Nuclear pore complex protein Nup98-Nup96 OS=Mus musculus GN=Nup98 PE=1 SV=1	392.577	382.048	351.834	406.573	362.303	346.382	389.192	371.955	378.565
A0A1B0GT88	Brain-enriched guanylate kinase-associated protein OS=Mus musculus GN=Begain PE=1 SV=1	344.531	362.614	369.054	391.022	359.599	369.394	410.81	391.455	401.639
A0A1C7CYU5	FTS and Hook-interacting protein OS=Mus musculus GN=Fam160a2 PE=1 SV=1	507.108	362.351	439.378	276.609	487.035	332.233	193.526	310.792	309.701
A0A1D5RLB2	Ankyrin-2 (Fragment) OS=Mus musculus GN=Ank2 PE=1 SV=1	297.342	361.406	316.544	418.04	354.532	380.24	510.153	390.211	434.056
A0A1D5RLF1	Receptor expression-enhancing protein OS=Mus musculus GN=Reep1 PE=1 SV=1	373.012	384.235	345.63	348.53	407.525	419.344	355.758	380.41	344.679
A0A1D5RLF9	Microtubule-associated serine/threonine-protein kinase 3 (Fragment) OS=Mus musculus GN=Mast3 PE=1 SV=1	427.964	277.044	425.701	436.47	242.522	458.162	414.377	305.667	392.555
A0A1D5RLG3	Rab3 GTPase-activating protein catalytic subunit OS=Mus musculus GN=Rab3gap1 PE=1 SV=1	383.971	355.69	389.163	374.048	390.712	378.317	340.317	359.087	382.72
A0A1D5RLL3	Protein EFR3 homolog A OS=Mus musculus GN=Efr3a PE=1 SV=1	348.504	410.527	385.362	360.551	342.919	410.957	393.396	370.427	353.532
A0A1D5RLL4	Transformation/transcription domain-associated protein OS=Mus musculus GN=Trrap PE=1 SV=1	339.844	338.601	376.952	473.887	387.212	335.227	386.612	368.732	405.689
A0A1D5RLM8	Uncharacterized protein OS=Mus musculus GN=Gm11639 PE=4 SV=1	482.961	432.839	253.413	264.864	556.676	444.15	230.63	394.02	199.23
A0A1D5RLN6	RIKEN cDNA 2900026A02 gene OS=Mus musculus GN=2900026A02Rik PE=1 SV=1	348.396	374.367	373.622	384.599	359.272	409.401	356.539	388.904	386.391
A0A1D5RLQ9	Serine/threonine-protein kinase MRCK alpha OS=Mus musculus GN=Cdc42bpa PE=1 SV=1	390.804	363.03	348.051	383.429	396.778	333.599	418.254	346.751	400.75
A0A1D5RLV1	Protein 4.1 (Fragment) OS=Mus musculus GN=Epb41 PE=1 SV=1	468.002	364.905	345.246	367.307	402.82	304.838	371.317	320.595	391.808
A0A1D5RM83	IQ motif and SEC7 domain-containing protein 1 OS=Mus musculus GN=Iqsec1 PE=1 SV=1	360.349	329.192	423.75	386.955	389.18	375.822	343.693	346.269	406.184
A0A1D5RMH0	Storkhead-box protein 2 OS=Mus musculus GN=Stox2 PE=1 SV=1	244.402	365.749	404.565	432.314	261.533	458.564	373.179	455.983	453.274
A0A1D5RMH7	PH and SEC7 domain-containing protein 3 OS=Mus musculus GN=Psd3 PE=1 SV=1	349.073	371.085	405.219	391.401	364.542	404.936	324.524	390.508	364.285
A0A1D5RMI4	Seizure 6-like protein OS=Mus musculus GN=Sez6l PE=1 SV=1	326.823	385.73	366.817	405.725	341.644	385.966	399.207	388.988	408.663
A0A1D5RML8	DNA-directed RNA polymerase II subunit RPB3 OS=Mus musculus GN=Polr2c PE=1 SV=1	454.897	461.482	342.871	362.91	319.325	354.829	412.82	309.327	328.953
A0A1L1M1J8	Potassium voltage-gated channel subfamily H member 1 OS=Mus musculus GN=Kcnh1 PE=1 SV=1	421.567	341.195	301.359	318.429	387.469	321.048	462.736	435.421	392.538
A0A1L1SQ41	Arginyl-tRNA--protein transferase 1 OS=Mus musculus GN=Ate1 PE=1 SV=1	381.472	365.349	381.58	382.517	353.789	385.204	337.181	385.248	392.151
A0A1L1SQ51	Talin-2 OS=Mus musculus GN=Tln2 PE=1 SV=1	371.857	364.213	377.441	381.107	384.708	387.632	366.816	376.009	357.663
A0A1L1SQU7	FAT atypical cadherin 1 OS=Mus musculus GN=Fat1 PE=1 SV=1	379.797	326.349	363.1	390.377	401.139	357.533	389.099	352.77	420.611
A0A1L1SR84	Protein turtle homolog B OS=Mus musculus GN=Igsf9b PE=1 SV=1	382.638	375.949	356.55	365.987	393.31	380.966	363.112	354.5	391.716
A0A1L1SR96	Anoctamin OS=Mus musculus GN=Ano8 PE=1 SV=1	350.402	362.878	341.296	404.344	382.013	346.284	391.917	330.775	498.043
A0A1L1SRD6	Neogenin (Fragment) OS=Mus musculus GN=Neo1 PE=1 SV=1	368.642	389.699	364.886	402.415	326.95	352.649	390.174	385.549	413.154
A0A1L1SRI1	Talin-2 (Fragment) OS=Mus musculus GN=Tln2 PE=1 SV=1	362.199	348.559	367.278	389.401	393.88	389.192	385.528	373.625	370.944
A0A1L1SRT0	BAG family molecular chaperone regulator 1 OS=Mus musculus GN=Bag1 PE=1 SV=1	351.82	376.608	442.78	350.256	387.32	384.176	318.093	378.068	349.395
A0A1L1SRX2	AMP deaminase OS=Mus musculus GN=Ampd3 PE=1 SV=1	401.619	396.13	384.484	321.938	358.144	383.248	337.468	401.14	351.736
A0A1L1SSC7	Tetratricopeptide repeat domain 13 OS=Mus musculus GN=Ttc13 PE=1 SV=1	321.596	397.288	292.985	391.944	414.658	382.925	471.082	366.211	390.791
A0A1L1SSF2	ADP-dependent glucokinase OS=Mus musculus GN=Adpgk PE=1 SV=1	363.802	389.385	332.946	398.452	376.887	355.942	427.05	347.246	410.747
A0A1L1SSH9	SPARC OS=Mus musculus GN=Sparc PE=1 SV=1	395.945	420.258	378.109	366.412	373.228	349.856	350.989	354.147	360.034
A0A1L1STE6	Isocitrate dehydrogenase [NAD] subunit, mitochondrial OS=Mus musculus GN=Idh3a PE=1 SV=1	417.779	371.474	361.007	362.55	404.507	358.663	343.444	359.343	363.402
A0A1L1STK0	Glycerophosphodiester phosphodiesterase domain-containing protein 5 OS=Mus musculus GN=Gdpd5 PE=1 SV=1	325.979	397.372	382.125	391.761	385.703	396.901	397.6	369.415	341.443
A0A1L1SV25	Alpha-actinin-4 OS=Mus musculus GN=Actn4 PE=1 SV=1	356.679	383.745	370.12	364.208	359.914	394.174	389.12	395.576	365.608
A0A1L1SV46	Noelin-2 OS=Mus musculus GN=Olfm2 PE=1 SV=1	386.404	359.439	379.059	301.44	435.229	411.578	304.791	418.91	324.407
A0A1L1SV73	Ubiquitin carboxyl-terminal hydrolase 47 OS=Mus musculus GN=Usp47 PE=1 SV=1	384.655	392.182	397.024	355.03	419.397	351.146	343.943	345.338	349.778
A0A1N9M8A6	DCN1-like protein OS=Mus musculus GN=Dcun1d5 PE=1 SV=1	372.452	381.2	309.827	416.135	377.431	387.601	365.929	415.699	369.55
A1BN54	Alpha actinin 1a OS=Mus musculus GN=Actn1 PE=1 SV=1	351.411	378.704	367.475	357.591	379.32	395.899	388.871	390.226	368.429
A1L3P4	Sodium/hydrogen exchanger OS=Mus musculus GN=Slc9a6 PE=1 SV=1	306.189	383.828	365.559	424.899	325.707	430.464	390.111	391.024	403.676
A2A432	Cullin-4B OS=Mus musculus GN=Cul4b PE=1 SV=1	395.693	366.048	374.291	334.343	419.717	390.975	338.858	380.657	334.757
A2A484	Zinc finger, MYND-type-containing 8 OS=Mus musculus GN=Zmynd8 PE=1 SV=1	337.729	323.509	332.007	418.258	391.556	363.413	430.247	382.671	445.794
A2A4J8	Vacuolar protein-sorting-associated protein 25 OS=Mus musculus GN=Vps25 PE=1 SV=1	391.187	406.119	383.105	407.441	282.202	307.492	422.892	382.475	411.402
A2A543	Voltage-dependent L-type calcium channel subunit beta-1 OS=Mus musculus GN=Cacnb1 PE=1 SV=1	357.855	398.296	368.31	366.309	368.34	402.455	352.389	402.118	352.755
A2A5R2	Brefeldin A-inhibited guanine nucleotide-exchange protein 2 OS=Mus musculus GN=Arfgef2 PE=1 SV=1	406.017	354.723	391.174	348.275	403.06	353.582	339.454	360.286	380.962
A2A5S3	Double-stranded RNA-binding protein Staufen homolog 1 OS=Mus musculus GN=Stau1 PE=1 SV=1	336.534	375.318	376.254	438.085	342.642	369.986	390.42	398.983	379.873
A2A5V4	SH3 domain-binding protein 1 OS=Mus musculus GN=Sh3bp1 PE=1 SV=1	382.601	389.316	372.304	358.743	405.268	392.375	361.467	341.125	348.029
A2A5Y6	Microtubule-associated protein OS=Mus musculus GN=Mapt PE=1 SV=1	382.081	347.03	367.619	386.449	373.481	398.575	346.822	365.587	401.585
A2A654	Bromodomain PHD finger transcription factor OS=Mus musculus GN=Bptf PE=1 SV=1	365.41	355.097	404.639	387.847	368.456	374.642	353.506	358.285	399.838
A2A690-2	Isoform 2 of Protein TANC2 OS=Mus musculus GN=Tanc2	354.199	354.925	408.886	373.341	363.416	362.83	382.029	365.019	410.912
A2A699	Protein FAM171A2 OS=Mus musculus GN=Fam171a2 PE=1 SV=1	367.707	413.626	347.214	344.266	387.905	396.298	373.905	378.446	356.155
A2A6Q5-3	Isoform 3 of Cell division cycle protein 27 homolog OS=Mus musculus GN=Cdc27	408.749	377.404	390.107	315.668	361.433	374.609	378.195	404.615	326.868
A2A6T1	Cerebellar degeneration-related protein 2-like OS=Mus musculus GN=Cdr2l PE=1 SV=1	370.505	318.647	376.047	424.783	367.269	316.005	426.64	412.862	390.062
A2A716	Oxysterol-binding protein OS=Mus musculus GN=Osbpl7 PE=1 SV=1	363.034	351.832	398.441	377.563	332.615	384.435	365.781	376.475	428.365
A2A7F6	Chloride channel protein OS=Mus musculus GN=Clcn6 PE=1 SV=1	371.883	412.514	358.289	392.47	343.203	378.553	378.038	401.685	343.139
A2A7S7	Tyrosine--tRNA ligase OS=Mus musculus GN=Yars PE=1 SV=1	363.731	345.363	408.378	353.843	400.947	392.654	351.369	365.463	370.601
A2A841	Protein 4.1 OS=Mus musculus GN=Epb41 PE=1 SV=1	453.784	331.694	284.639	420.073	423.263	326.583	392.575	347.346	395.985
A2A863	Integrin beta-4 OS=Mus musculus GN=Itgb4 PE=1 SV=1	374.927	273.273	405.548	424.788	379.584	356.546	444.429	322.979	413.932
A2A891	Calmodulin-binding transcription activator 1 OS=Mus musculus GN=Camta1 PE=2 SV=1	245.873	385.276	330.265	378.042	431.012	440.498	569.513	306.088	372.312
A2A8L1	Chromodomain-helicase-DNA-binding protein 5 OS=Mus musculus GN=Chd5 PE=1 SV=1	371.998	348.527	374.695	372.552	360.667	388.418	342.757	391.391	420.675
A2A8L5	Receptor-type tyrosine-protein phosphatase F OS=Mus musculus GN=Ptprf PE=1 SV=1	376.465	383.708	366.791	360.074	399.529	368.359	398.622	369.535	342.38
A2A8R0	MCG17975 OS=Mus musculus GN=Zfyve9 PE=1 SV=1	306.967	421.263	389.515	369.229	338.678	435.44	327.449	478.654	312.308
A2A8U2	Transmembrane protein 201 OS=Mus musculus GN=Tmem201 PE=1 SV=1	482.124	243.186	315.664	203.045	700.949	210.907	195.472	340.413	557.27
A2A9C3	Protein SZT2 OS=Mus musculus GN=Szt2 PE=1 SV=1	342.269	385.448	367.956	434.812	314.604	361.068	392.228	335.788	483.363
A2A9M4	Dedicator of cytokinesis protein 7 OS=Mus musculus GN=Dock7 PE=1 SV=2	377.98	374.003	366.732	370.329	357.988	371.328	401.729	376.457	381.498
A2A9Q2	Nardilysin, N-arginine dibasic convertase, NRD convertase 1 OS=Mus musculus GN=Nrd1 PE=1 SV=1	344.367	396.248	395.734	391.718	323.033	368.611	381.063	392.212	396.305
A2A9S1	ELAV-like protein 4 (Fragment) OS=Mus musculus GN=Elavl4 PE=1 SV=1	448.866	400.991	363.855	347.612	405.298	350.488	315.278	371.757	309.684
A2A9V9	BTB/POZ domain-containing protein KCTD2 OS=Mus musculus GN=Kctd2 PE=1 SV=1	251.198	198.682	366.548	592.827	369.203	394.489	395.92	362.613	574.12
A2A9Z2	Dystrophin OS=Mus musculus GN=Dmd PE=1 SV=1	358.295	353.416	358.513	424.197	353.001	363.052	375.05	381.404	435.516
A2AAE1-2	Isoform 2 of Uncharacterized protein KIAA1109 OS=Mus musculus GN=Kiaa1109	324.812	378.946	354.251	408.392	355.429	390.047	420.925	389.777	393.415
A2AAN9	RING finger protein 157 OS=Mus musculus GN=Rnf157 PE=1 SV=1	345.684	352.547	395.949	408.048	378.474	394.561	359.196	387.167	357.81
A2AAY5	SH3 and PX domain-containing protein 2B OS=Mus musculus GN=Sh3pxd2b PE=1 SV=1	195.48	329.226	342.843	504.756	266.968	388.343	497.89	397.116	621.075
A2AB59	Rho GTPase-activating protein 27 OS=Mus musculus GN=Arhgap27 PE=1 SV=1	264.395	432.348	397.033	403.717	262.87	429.717	387.093	391.859	465.015
A2AB60	Formin-like 1, isoform CRA_c OS=Mus musculus GN=Fmnl1 PE=1 SV=1	379.572	382.758	382.1	364.079	349.389	379.748	381.984	381.233	366.107
A2ACD2	V-set and transmembrane domain-containing protein 2-like protein OS=Mus musculus GN=Vstm2l PE=1 SV=1	369.308	413.717	347.343	380.033	429.809	418.032	310.669	369.753	311.091
A2ACM0	Putative uncharacterized protein OS=Mus musculus GN=Rptor PE=1 SV=1	369.658	378.66	409.529	369.271	350.599	393.33	347.322	371.384	367.321
A2ACV6	Protein SOGA1 OS=Mus musculus GN=Soga1 PE=1 SV=1	341.732	247.031	424.953	443.891	388.933	399.638	359.98	338.233	449.673
A2AD03	Rab proteins geranylgeranyltransferase component A 1 OS=Mus musculus GN=Chm PE=1 SV=1	377.497	405.788	344.635	319.631	423.784	419.577	323.274	400.742	324.379
A2ADA5	tRNA pseudouridine synthase-like 1 OS=Mus musculus GN=Pusl1 PE=1 SV=1	394.645	375.405	359.484	340.696	400.886	382.995	401.021	365.281	335.142
A2ADY9	Protein DDI1 homolog 2 OS=Mus musculus GN=Ddi2 PE=1 SV=1	403.636	361.735	393.69	363.391	375.015	378.793	371.012	332.303	368.897
A2AE27	AMP deaminase OS=Mus musculus GN=Ampd2 PE=1 SV=1	377.267	372.229	378.308	384.34	378.377	378.929	385.943	374.88	338.343
A2AEE7	Cadherin EGF LAG seven-pass G-type receptor 2 OS=Mus musculus GN=Celsr2 PE=1 SV=1	361.923	367.051	330.019	363.081	353.826	385.125	418.506	417.812	402.667
A2AEG2	Oral-facial-digital syndrome 1 gene homolog (Human) OS=Mus musculus GN=Ofd1 PE=1 SV=1	429.934	346.861	295.199	429.152	390.759	306.241	406.119	395.305	393.26
A2AEM2	Chloride channel CLIC-like 1, isoform CRA_a OS=Mus musculus GN=Clcc1 PE=1 SV=1	377.057	235.357	418.837	374.824	449.481	337.433	347.652	309.444	511.195
A2AES4	OTU domain-containing protein 5 OS=Mus musculus GN=Otud5 PE=1 SV=1	330.08	387.079	339.833	461.465	395.911	395.027	410.917	360.585	334.916
A2AEV7	Coiled-coil domain containing 120 OS=Mus musculus GN=Ccdc120 PE=1 SV=1	76.0188	367.46	231.589	493.023	238.278	366.095	671.354	473.862	750.792
A2AEW1	Transcription factor E3 OS=Mus musculus GN=Tfe3 PE=1 SV=1	370.404	491.417	447.832	398.337	300.321	343.743	331.103	365.561	294.822
A2AEW8	GRIP1-associated protein 1 OS=Mus musculus GN=Gripap1 PE=1 SV=1	382.949	388.235	375.427	366.889	379.279	389.039	342.879	382.54	346.404
A2AEX6	Four and a half LIM domains protein 1 OS=Mus musculus GN=Fhl1 PE=1 SV=1	402.032	354.032	399.044	365.786	393.31	382.697	356.152	359.145	328.458
A2AF47	Dedicator of cytokinesis protein 11 OS=Mus musculus GN=Dock11 PE=1 SV=1	266.917	337.569	352.485	415.448	326.791	420.811	440.9	432.99	464.839
A2AFF6	Cohesin subunit SA-2 OS=Mus musculus GN=Stag2 PE=1 SV=1	366.538	387.406	304.979	384.785	360.938	344.088	448.558	371.11	448.528
A2AFM4	DNA-(apurinic or apyrimidinic site) lyase OS=Mus musculus GN=Apex2 PE=1 SV=1	404.765	366.347	536.816	342.324	194.589	370.105	224.334	495.674	371.205
A2AFP5	RAB9, member RAS oncogene family (Fragment) OS=Mus musculus GN=Rab9 PE=1 SV=1	234.605	400.822	253.568	539.341	296.986	268.025	708.775	442.109	439.438
A2AFQ0	E3 ubiquitin-protein ligase HUWE1 OS=Mus musculus GN=Huwe1 PE=1 SV=1	351.316	368.243	384.444	358.911	372.048	371.229	389.726	383.365	399.429
A2AFQ2	3-hydroxyacyl-CoA dehydrogenase type-2 OS=Mus musculus GN=Hsd17b10 PE=1 SV=1	435.613	371.957	320.38	350.99	384.118	389.75	367.895	380.28	349.073
A2AFR3	FERM and PDZ domain-containing protein 4 OS=Mus musculus GN=Frmpd4 PE=1 SV=1	317.944	389.176	374.953	369.011	295.78	423.723	310.849	433.83	481.959
A2AG30	DnaJ (Hsp40) homolog, subfamily B, member 5, isoform CRA_a OS=Mus musculus GN=Dnajb5 PE=1 SV=1	337.335	445.884	361.523	371.606	435.029	332.004	384.787	351.469	353.928
A2AG50	MAP7 domain-containing protein 2 OS=Mus musculus GN=Map7d2 PE=1 SV=1	412.258	280.913	397.807	376.802	454.56	357.12	318.022	311.53	426.936
A2AG58	Uncharacterized protein CXorf23 homolog OS=Mus musculus PE=1 SV=1	245.923	319.395	332.377	507.791	413.911	328.28	395.62	373.329	566.183
A2AG68	Copper-transporting ATPase 1 OS=Mus musculus GN=Atp7a PE=1 SV=1	368.709	441.499	377.625	378.465	330.418	356.075	367.628	402.013	348.615
A2AGI2	Neuroligin-3 OS=Mus musculus GN=Nlgn3 PE=1 SV=1	337.762	385.194	364.511	383.468	347.736	382.626	410.366	405.927	383.101
A2AGQ6	MAP kinase-activating death domain protein OS=Mus musculus GN=Madd PE=1 SV=1	399.967	387.446	414.733	348.643	379.313	380.47	337.938	357.895	321.966
A2AGX3	PR domain-containing protein 11 OS=Mus musculus GN=Prdm11 PE=1 SV=1	374.931	334.337	396.488	380.332	334.668	378.545	357.862	360.066	459.463
A2AH25	Rho GTPase-activating protein 1 OS=Mus musculus GN=Arhgap1 PE=1 SV=1	383.696	378.484	400.742	307.815	378.713	394.844	372.341	390.354	331.248
A2AH85	116 kDa U5 small nuclear ribonucleoprotein component OS=Mus musculus GN=Eftud2 PE=1 SV=1	395.026	392.741	389.701	354.709	364.695	358.737	365.948	385.07	342.592
A2AHB8	Potassium channel subfamily T member 1 OS=Mus musculus GN=Kcnt1 PE=1 SV=1	431.876	386.33	361.632	327.159	372.139	316.048	437.66	337.865	382.036
A2AHG0	Leucine zipper putative tumor suppressor 3 OS=Mus musculus GN=Lzts3 PE=1 SV=1	285.163	348.475	346.413	462.984	308.76	415.102	472.665	413.347	415.009
A2AHJ7	Diacylglycerol kinase OS=Mus musculus GN=Dgkz PE=1 SV=1	353.677	361.386	336.989	435.136	395.389	331.118	395.853	384.653	415.361
A2AI05	NADPH-dependent diflavin oxidoreductase 1 OS=Mus musculus GN=Ndor1 PE=2 SV=1	218.636	321.838	387.67	466.095	276.866	349.07	490.968	377.889	622.624
A2AI08	Taperin OS=Mus musculus GN=Tprn PE=1 SV=1	356.37	362.135	323.687	416.824	339.248	427.544	407.988	374.332	406.27
A2AI21	Glutamate receptor ionotropic, NMDA 1 OS=Mus musculus GN=Grin1 PE=1 SV=1	399.218	393.855	374.527	346.054	435.023	376.346	310.929	387.482	301.068
A2AI52	Ubiquitin carboxyl-terminal hydrolase 8 OS=Mus musculus GN=Usp8 PE=1 SV=1	365.622	398.638	392.416	364.499	363.327	386.396	356.776	372.437	360.282
A2AI76	Kelch-like 34 OS=Mus musculus GN=Klhl34 PE=4 SV=1	293.434	272.285	434.315	473.888	453.742	357.02	321.742	298.452	497.344
A2AI87	Phosphorylase b kinase regulatory subunit alpha, skeletal muscle isoform OS=Mus musculus GN=Phka1 PE=1 SV=1	363.242	408.748	331.364	371.01	366.503	353.628	433.537	397.982	370.492
A2AIL4	NADH dehydrogenase (ubiquinone) complex I, assembly factor 6 OS=Mus musculus GN=Ndufaf6 PE=1 SV=1	370.305	373.534	328.899	377.914	329.589	392.833	450.342	384.668	400.247
A2AIX1	SEC16 homolog A, endoplasmic reticulum export factor OS=Mus musculus GN=Sec16a PE=1 SV=1	384.45	383.121	353.969	380.491	376.423	379.825	357.968	394.973	356.264
A2AJ15	Endoplasmic reticulum mannosyl-oligosaccharide 1,2-alpha-mannosidase OS=Mus musculus GN=Man1b1 PE=1 SV=1	455.117	451.068	368.899	369.559	319.159	389.973	270.075	354.829	336.264
A2AJ26	ATP-binding cassette sub-family A member 2 OS=Mus musculus GN=Abca2 PE=1 SV=1	363.617	376.377	379.817	386.118	322.505	360.286	410.094	395.462	398.539
A2AJ88	Patatin-like phospholipase domain-containing protein 7 OS=Mus musculus GN=Pnpla7 PE=1 SV=1	321.569	373.219	364.275	404.573	349.467	414.246	404.328	364.509	415.635
A2AJA9	Uncharacterized protein C9orf172 homolog OS=Mus musculus GN=Gm996 PE=1 SV=1	350.994	381.564	350.661	418.243	385.77	378.319	392.113	371.757	366.7
A2AJI0	MAP7 domain-containing protein 1 OS=Mus musculus GN=Map7d1 PE=1 SV=1	380.065	314.621	437.467	363.681	386.789	383.744	302.666	331.987	438.567
A2AJK6	Chromodomain-helicase-DNA-binding protein 7 OS=Mus musculus GN=Chd7 PE=1 SV=1	212.336	429.933	390.845	379.921	273.956	430.779	485.781	408.79	456.649
A2AJL3	FGGY carbohydrate kinase domain-containing protein OS=Mus musculus GN=Fggy PE=1 SV=1	203.923	229.585	433.151	513.098	298.293	461.269	402.131	408.84	543.136
A2AJQ0	[Pyruvate dehydrogenase [acetyl-transferring]]-phosphatase 1, mitochondrial OS=Mus musculus GN=Pdp1 PE=1 SV=2	387.382	357.822	386.311	382.516	367.202	348.93	362.853	380.902	391.675
A2AJW4	Protein phosphatase 1 regulatory subunit OS=Mus musculus GN=Ppp1r3d PE=1 SV=1	277.463	300.173	402.831	498.193	388.534	330.67	385.956	385.421	475.792
A2AJW5	Family with sequence similarity 217, member B OS=Mus musculus GN=Fam217b PE=1 SV=1	398.288	331.925	322.248	325.73	328.349	406.841	471.192	375.796	436.489
A2AKG8	Focadhesin OS=Mus musculus GN=Focad PE=1 SV=1	383.494	370.103	410.561	337.488	357.635	354.798	395.57	372.72	372.562
A2AKQ8	Tetratricopeptide repeat protein 30A2 OS=Mus musculus GN=Ttc30a2 PE=1 SV=1	396.563	354.721	302.662	365.739	404.72	372.395	461.726	393.452	339.192
A2AKV6	Alpha-ketoglutarate-dependent dioxygenase alkB homolog 3 OS=Mus musculus GN=Alkbh3 PE=1 SV=1	356.857	409.911	378.704	367.577	338.72	430.232	418.969	343.722	334.41
A2AKW0	Solute carrier family 25 member 51 OS=Mus musculus GN=Slc25a51 PE=1 SV=1	409.26	368.45	403.655	294.704	416.486	336.64	322.396	375.889	387.989
A2AL50	Alkylglycerone-phosphate synthase OS=Mus musculus GN=Agps PE=1 SV=1	377.157	390.842	390.757	350.185	374.534	376.096	375.249	372.54	347.594
A2ALI5	Adherens junction-associated protein 1 OS=Mus musculus GN=Ajap1 PE=2 SV=1	312.856	364.128	317.396	426.13	317.511	391.763	422.47	444.958	451.305
A2ALK6	Band 4.1-like protein 4B OS=Mus musculus GN=Epb41l4b PE=1 SV=1	474.366	410.992	323.321	349.441	351.117	365.027	393.387	338.02	332.762
A2ALK8	Tyrosine-protein phosphatase non-receptor type 3 OS=Mus musculus GN=Ptpn3 PE=1 SV=1	377.572	403.959	411.947	419.162	376.759	369.589	243.434	380.546	355.32
A2ALL9	Calcium-transporting ATPase OS=Mus musculus GN=Atp2b3 PE=1 SV=1	383.686	362.967	371.261	371.89	397.072	358.753	381.064	360.682	378.152
A2ALS5-2	Isoform 2 of Rap1 GTPase-activating protein 1 OS=Mus musculus GN=Rap1gap	375.085	368.537	387.575	352.907	380.472	375.651	377.856	354.744	388.635
A2ALS7	Rap1 GTPase-activating protein 1 (Fragment) OS=Mus musculus GN=Rap1gap PE=1 SV=1	375.975	373.655	374.455	354.818	388.665	373.679	385.749	348.784	389.283
A2ALV1	Endophilin-A1 OS=Mus musculus GN=Sh3gl2 PE=1 SV=1	392.043	377.917	350.604	367.365	391.509	364.819	385.516	372.341	364.346
A2ALV3	Endophilin-A1 OS=Mus musculus GN=Sh3gl2 PE=1 SV=1	390.939	369.122	355.877	364.384	400.968	370.575	379.278	367.801	363.474
A2ALW2	Zinc finger with KRAB and SCAN domains 16 OS=Mus musculus GN=Zkscan16 PE=1 SV=1	532.552	221.422	333.167	285.218	509.144	223.559	580.476	246.938	401.887
A2AM67	SH2 domain-containing protein 5 OS=Mus musculus GN=Sh2d5 PE=1 SV=1	338.581	371.177	398.371	364.743	377.278	376.844	412.306	362.209	380.897
A2AMH4	Choline transporter-like protein 1 OS=Mus musculus GN=Slc44a1 PE=1 SV=1	322.637	408.992	372.32	383.553	315.242	377.447	423.341	381.366	428.051
A2AN08-5	Isoform 5 of E3 ubiquitin-protein ligase UBR4 OS=Mus musculus GN=Ubr4	354.674	359.772	384.411	362.639	381.051	394.414	354.709	385.583	392.109
A2AN37	Uridine kinase OS=Mus musculus GN=Uck1 PE=1 SV=1	351.667	368.748	408.905	406.864	345.076	352.726	400.162	368.951	384.804
A2ANP1	2310028H24Rik protein OS=Mus musculus GN=Fam219a PE=1 SV=1	310.84	396.53	309.927	473.537	328.364	331.317	507.022	374.04	442.408
A2ANY6	Midasin AAA ATPase 1 OS=Mus musculus GN=Mdn1 PE=1 SV=1	351.928	403.639	353.76	349.291	352.556	427.477	378.712	386.277	375.241
A2AP18-3	Isoform 3 of 1-phosphatidylinositol 4,5-bisphosphate phosphodiesterase eta-2 OS=Mus musculus GN=Plch2	352.287	355.294	359.677	417.643	365.336	377.096	396.025	378.901	399.533
A2API5	Low-density lipoprotein receptor-related protein 1B OS=Mus musculus GN=Lrp1b PE=1 SV=2	365.116	353.651	391.433	375.599	342.574	396.236	354.437	394.018	400.197
A2APM2	CD44 antigen OS=Mus musculus GN=Cd44 PE=1 SV=1	408.401	383.8	392.536	351.905	383.584	427.739	306.981	331.068	338.315
A2APT9	Kelch domain-containing protein 7A OS=Mus musculus GN=Klhdc7a PE=1 SV=3	316.401	337.222	348.109	397.013	388.93	384.629	417.601	431.242	396.823
A2APV2-3	Isoform 3 of Formin-like protein 2 OS=Mus musculus GN=Fmnl2	414.499	360.518	406.331	340.704	403.935	344.079	347.31	349.465	360.682
A2APX8	Sodium channel protein type 1 subunit alpha OS=Mus musculus GN=Scn1a PE=1 SV=1	417.992	332.551	385.071	330.356	474.128	340.461	351.814	365.627	322.007
A2APY7	Arginine-hydroxylase NDUFAF5, mitochondrial OS=Mus musculus GN=Ndufaf5 PE=1 SV=1	349.632	380.196	372.77	381.767	346.813	382.951	416.459	375.907	387.974
A2AQ07	Tubulin beta-1 chain OS=Mus musculus GN=Tubb1 PE=1 SV=1	329.674	397.085	366.52	370.828	367.163	383.624	396.923	400.627	381.083
A2AQ19	RNA polymerase-associated protein RTF1 homolog OS=Mus musculus GN=Rtf1 PE=1 SV=1	407.087	387.206	332.812	384.703	454.051	392.061	288.481	387.685	300.535
A2AQ87	SH2 domain-containing adapter protein F (Fragment) OS=Mus musculus GN=Shf PE=1 SV=1	422.452	270.173	309.891	462.058	472.308	264.376	351.158	292.979	547.558
A2AQC3	Phospholipid-transporting ATPase OS=Mus musculus GN=Atp9a PE=1 SV=1	320.5	365.909	347.852	399.225	382.953	351.665	439.281	430.772	381.476
A2AQJ6	Transmembrane protein 87A OS=Mus musculus GN=Tmem87a PE=1 SV=1	294.205	355.718	430.59	394.59	344.623	370.635	410.727	367.099	440.693
A2AQN4	Acetyl-coenzyme A synthetase, cytoplasmic OS=Mus musculus GN=Acss2 PE=1 SV=1	364.505	376.261	368.098	393.091	356.726	410.907	363.978	389.616	354.567
A2AQU8	Sulfiredoxin-1 OS=Mus musculus GN=Srxn1 PE=1 SV=1	245.571	429.254	294.316	412.593	377.569	437.299	436.931	406.509	422.086
A2AR02	Peptidyl-prolyl cis-trans isomerase G OS=Mus musculus GN=Ppig PE=1 SV=1	443.953	404.283	371.274	422.038	367.711	314.054	352.465	358.679	310.014
A2AR50	Ras-specific guanine nucleotide-releasing factor RalGPS1 OS=Mus musculus GN=Ralgps1 PE=1 SV=2	393.777	346.882	332.647	364.03	332.049	442.414	405.596	371.585	396.318
A2ARP1	Inositol hexakisphosphate and diphosphoinositol-pentakisphosphate kinase 1 OS=Mus musculus GN=Ppip5k1 PE=1 SV=1	318.45	383.73	401.131	369.895	336.077	427.635	379.24	399.617	372.381
A2ARP8	Microtubule-associated protein 1A OS=Mus musculus GN=Map1a PE=1 SV=1	382.276	358.736	400.331	370.091	377.497	392.042	331.63	358.982	378.263
A2ARS0	Ankyrin repeat domain-containing protein 63 OS=Mus musculus GN=Ankrd63 PE=1 SV=1	339.213	373.227	340.22	399.383	355.021	400.259	389.319	410.246	400.29
A2AS98	Nck-associated protein 1 OS=Mus musculus GN=Nckap1 PE=1 SV=1	372.973	357.326	387.123	366.439	407.895	384.342	342.541	377.818	356.852
A2ASZ8-5	Isoform 5 of Calcium-binding mitochondrial carrier protein SCaMC-2 OS=Mus musculus GN=Slc25a25	342.874	367.261	357.777	389.194	377.963	366.256	421.676	384.43	394.428
A2AT37	UPF2 regulator of nonsense transcripts homolog (Yeast) OS=Mus musculus GN=Upf2 PE=1 SV=1	326.378	374.241	383.563	377.017	350.402	388.896	411.39	391.302	396.319
A2AT93	Phospholipase C, beta 4 (Fragment) OS=Mus musculus GN=Plcb4 PE=1 SV=1	407.149	401.8	279.454	399.382	396.317	324.719	416.641	363.546	406.556
A2ATK9	Family with sequence similarity 171, member A1 OS=Mus musculus GN=Fam171a1 PE=1 SV=1	317.976	388.34	441.162	391.509	272.282	375.901	411.374	395.896	407.639
A2ATS6	Reticulon-4 receptor-like 2 (Fragment) OS=Mus musculus GN=Rtn4rl2 PE=1 SV=1	298.845	407.072	362.287	402.16	307.425	431.073	389.977	358.761	467.178
A2AU34	Transmembrane protein 74B OS=Mus musculus GN=Tmem74b PE=1 SV=1	431.567	342.21	333.116	342.461	355.011	406.804	360.884	430.002	350.588
A2AUD5	Tumor protein D54 OS=Mus musculus GN=Tpd52l2 PE=1 SV=1	323.81	379.033	376.72	410.031	382.308	401.347	365.612	396.609	357.01
A2AUK8	Band 4.1-like protein 1 OS=Mus musculus GN=Epb41l1 PE=1 SV=1	361.73	354.714	372.628	384.713	369.193	381.584	406.167	370.084	386
A2AV25	Fibrinogen C domain-containing protein 1 OS=Mus musculus GN=Fibcd1 PE=2 SV=1	360.729	412.724	367.447	502.341	310.399	342.288	419.579	357.387	347.459
A2AVR9	Dynein light chain roadblock OS=Mus musculus GN=Dynlrb1 PE=1 SV=1	400.083	407.418	337.931	327.42	378.893	372.389	431.348	361.038	347.671
A2AW15	Tau-tubulin kinase 2 OS=Mus musculus GN=Ttbk2 PE=1 SV=1	354.751	371.318	403.45	400.945	336.687	370.954	414.383	353.834	383.157
A2AWA9	Rab GTPase-activating protein 1 OS=Mus musculus GN=Rabgap1 PE=1 SV=1	377.907	368.877	394.393	363.79	382.61	383.55	341.795	369.638	369.581
A2AWI7	Endophilin-B2 OS=Mus musculus GN=Sh3glb2 PE=1 SV=1	440.297	378.36	363.103	354.44	414.727	355.85	346.747	351.905	320.36
A2AWN8	YTH domain family 1, isoform CRA_a OS=Mus musculus GN=Ythdf1 PE=1 SV=1	351.652	343.79	410.156	393.323	414.138	392.208	286.736	372.504	388.221
A2AWP8	Rho guanine nucleotide exchange factor 10-like protein OS=Mus musculus GN=Arhgef10l PE=1 SV=1	360.338	399.439	351.734	349.467	366.572	374.432	393.587	408.326	375.987
A2AWT7	Nucleolar transcription factor 1 OS=Mus musculus GN=Ubtf PE=1 SV=1	414.473	405.098	325.667	367.781	424.041	366.218	352.036	367.286	324.931
A2BDX3	Adenylyltransferase and sulfurtransferase MOCS3 OS=Mus musculus GN=Mocs3 PE=1 SV=1	358.873	370.361	349.059	397.072	358.655	368.866	417.55	381.619	399.725
A2BE28	Ribosomal biogenesis protein LAS1L OS=Mus musculus GN=Las1l PE=1 SV=1	395.198	310.524	345.688	399.578	436.773	385.972	394.706	374.785	327.96
A2BEE9	Disks large homolog 3 OS=Mus musculus GN=Dlg3 PE=1 SV=1	354.475	377.034	379.196	374.505	357.653	383.245	381.391	386.649	386.84
A2CG35	Ras-related protein Rab-12 OS=Mus musculus GN=Rab12 PE=1 SV=1	424.641	361.833	368.752	319.763	420.451	366.729	353.775	375.561	334.309
A2CG49	Kalirin OS=Mus musculus GN=Kalrn PE=1 SV=1	350.027	377.018	378.818	357.293	381.114	400.679	383.16	392.045	352.47
A2RSJ4	UHRF1-binding protein 1-like OS=Mus musculus GN=Uhrf1bp1l PE=1 SV=2	351.513	392.506	418.033	371.816	360.972	408.653	324.279	371.222	354.745
A2RSQ0	DENN domain-containing protein 5B OS=Mus musculus GN=Dennd5b PE=1 SV=2	345.274	419.151	363.335	342.168	381.426	335.291	424.042	378.514	395.922
A2RSX7	tRNA wybutosine-synthesizing protein 5 OS=Mus musculus GN=Tyw5 PE=2 SV=2	396.522	400.655	402.08	354.569	397.712	391.079	283.968	398.343	293.846
A2RT62	F-box/LRR-repeat protein 16 OS=Mus musculus GN=Fbxl16 PE=1 SV=1	333.326	398.129	391.81	381.88	369.547	412.333	355.153	403.98	327.612
A2TJV2	Paralemmin-3 OS=Mus musculus GN=Palm3 PE=1 SV=1	320.92	418.742	257.016	378.534	447.869	342.783	518.407	380.166	375.504
A3KFX0	Cytosolic 5'-nucleotidase 1A OS=Mus musculus GN=Nt5c1a PE=1 SV=1	433.051	402.164	343.591	387.105	395.877	308.683	480.128	333.059	283.437
A3KG93	Lysine-specific histone demethylase 1A OS=Mus musculus GN=Kdm1a PE=1 SV=1	433.077	411.516	367.74	359.475	395.628	331.363	339.885	353.985	336.782
A3KGB4	TBC1 domain family member 8B OS=Mus musculus GN=Tbc1d8b PE=1 SV=1	320.747	363.058	368.856	422.72	366.521	369.661	391.486	383.454	427.319
A3KGU9	Spectrin alpha chain, non-erythrocytic 1 OS=Mus musculus GN=Sptan1 PE=1 SV=2	399.829	367.348	379.365	365.393	399.657	365.868	363.632	356.813	350.704
A3KMP2	Tetratricopeptide repeat protein 38 OS=Mus musculus GN=Ttc38 PE=1 SV=2	374.444	338.366	376.444	401.86	411.174	372.105	358.991	369.266	366.485
A3QM89	Reticulon (Fragment) OS=Mus musculus GN=Rtn1 PE=1 SV=1	404.29	428.022	343.054	303.073	404.899	404.803	339.88	401.895	298.077
A5A4Y9	Protein phosphatase 1 regulatory subunit 11 OS=Mus musculus GN=Ppp1r11 PE=1 SV=1	331.365	367.336	334.24	472.74	367.817	423.294	353.012	404.918	361.584
A5D6P2	Par-3 (Partitioning defective 3) homolog (C. elegans) OS=Mus musculus GN=Pard3 PE=1 SV=1	399.966	408.571	334.668	360.99	373.657	382.019	380.097	354.732	369.934
A6H5Y3	Methionine synthase OS=Mus musculus GN=Mtr PE=1 SV=1	361.474	379.696	399.088	362.294	361.057	371.954	389.077	370.301	374.601
A6H5Z3	Exocyst complex component 6B OS=Mus musculus GN=Exoc6b PE=1 SV=1	351.584	404.37	366.963	370.53	354.297	393.004	392.765	401.193	347.449
A6H611	Mitochondrial intermediate peptidase OS=Mus musculus GN=Mipep PE=1 SV=1	357.283	357.116	376.942	367.258	359.782	386.329	396.594	372.663	410.531
A6H630	Protein-glutamate O-methyltransferase OS=Mus musculus GN=Armt1 PE=1 SV=1	379.832	396.478	413.682	341.147	356.762	428.239	275.818	381.289	353.576
A6H6A9	Rab GTPase-activating protein 1-like OS=Mus musculus GN=Rabgap1l PE=1 SV=1	379.289	388.264	373.928	385.28	369.548	399.003	364.444	368.205	335.93
A6H6A9-3	Isoform 3 of Rab GTPase-activating protein 1-like OS=Mus musculus GN=Rabgap1l	349.07	390.469	385.955	368.954	360.494	414.368	337.984	397.32	362.577
A6H8H2-2	Isoform 2 of DENN domain-containing protein 4C OS=Mus musculus GN=Dennd4c	400.642	406.34	323.14	401.2	387.769	335.5	462.746	354.951	316.452
A6H8H5	Potassium voltage-gated channel subfamily B member 2 OS=Mus musculus GN=Kcnb2 PE=1 SV=2	333.077	373.07	353.448	418.854	344.747	417.844	408.244	414.309	347.53
A6MDD2	Protein tyrosine phosphatase receptor type N OS=Mus musculus GN=Ptprn PE=1 SV=1	265.08	385.518	385.494	380.622	300.837	460.617	438.712	379.927	439.941
A6X8Z5	Rho GTPase-activating protein 31 OS=Mus musculus GN=Arhgap31 PE=1 SV=1	326.527	383.911	375.857	340.44	349.299	340.518	416.308	424.881	442.01
A6X935	Inter alpha-trypsin inhibitor, heavy chain 4 OS=Mus musculus GN=Itih4 PE=1 SV=2	268.397	353.884	390.019	412.924	284.572	455.895	409.066	416.661	451.578
A6X940	Fermitin family homolog 2 (Fragment) OS=Mus musculus GN=Fermt2 PE=1 SV=1	322.436	367.942	375.151	290.583	414.362	418.2	406.36	402.737	373.233
A6ZI44	Fructose-bisphosphate aldolase OS=Mus musculus GN=Aldoa PE=1 SV=1	380.991	366.163	383.993	372.145	378.79	390.592	353.409	354.123	378.63
A6ZI46	Fructose-bisphosphate aldolase OS=Mus musculus GN=Aldoart1 PE=1 SV=1	369.296	349.707	376.803	368.781	391.196	394.685	362.92	362.601	391.251
A6ZI47	Fructose-bisphosphate aldolase OS=Mus musculus GN=Aldoart2 PE=1 SV=1	337.025	362.924	370.284	388.659	344.979	401.794	411.453	352.563	435.15
A7E1Z5	Anion exchange protein OS=Mus musculus GN=Slc4a4 PE=1 SV=1	391.093	384.774	369.788	400.851	394.256	362.953	344.435	365.538	344.708
A7TU71	Protein Shroom2 OS=Mus musculus GN=Shroom2 PE=1 SV=1	358.689	378.042	423.178	372.497	346.993	437.768	323.86	377.44	331.74
A7YQ68	Prickle-like 2 (Drosophila) OS=Mus musculus GN=Prickle2 PE=1 SV=1	349.55	351.487	408.993	393.17	374.618	388.642	369.177	364.046	374.583
A8DUK4	Beta-globin OS=Mus musculus GN=Hbbt1 PE=1 SV=1	483.173	393.394	326.903	318.65	375.842	315.93	373.742	365.929	372.787
A8IK50	Purkinje cell protein 2 OS=Mus musculus GN=Pcp2 PE=1 SV=1	389.392	464.415	381.234	327.812	301.042	308.817	399.719	347.894	446.213
A8Y5H7-3	Isoform 3 of SEC14-like protein 1 OS=Mus musculus GN=Sec14l1	369.27	378.822	373.337	392.801	387.305	375.489	372.68	377.252	344.333
A8Y5T6	Probable proline--tRNA ligase, mitochondrial OS=Mus musculus GN=Pars2 PE=1 SV=1	406.406	360.142	349.487	353.85	414.762	353	420.61	356.689	346.47
A9DA50	Leucine-rich repeat and immunoglobulin-like domain-containing nogo receptor-interacting protein 1 OS=Mus musculus GN=Lingo1 PE=1 SV=1	314.856	377.122	363.272	393.298	416.972	421.374	357.265	371.141	373.82
B0F2B4	Neuroligin 4-like OS=Mus musculus GN=Nlgn4l PE=1 SV=1	328.877	376.834	361.433	373.067	356.566	403.984	411.653	408.496	380.571
B0QZL1	Alpha-enolase (Fragment) OS=Mus musculus GN=Eno1 PE=1 SV=1	415.611	386.267	356.414	354.852	384.073	370.121	372.516	368.669	339.644
B0QZN5	Vesicle-associated membrane protein 2 OS=Mus musculus GN=Vamp2 PE=1 SV=1	393.118	379.453	351.83	345.578	365.723	411.288	374.407	377.445	361.709
B0QZW1	Glutamate receptor 3 OS=Mus musculus GN=Gria3 PE=1 SV=1	379.622	379.8	389.878	364.716	390.159	365.005	351.166	360.815	372.156
B0V2N1	Receptor-type tyrosine-protein phosphatase S OS=Mus musculus GN=Ptprs PE=1 SV=1	361.9	378.128	379.337	384.073	359.627	382.627	386.07	385.006	361.997
B0V2N1-3	Isoform 3 of Receptor-type tyrosine-protein phosphatase S OS=Mus musculus GN=Ptprs	374.01	376.96	386.282	380.906	364.914	381.971	372.396	377.85	351.556
B1APX2	RIKEN cDNA 5031439G07 gene OS=Mus musculus GN=5031439G07Rik PE=1 SV=1	341.48	385.377	363.744	427.157	346.99	423.344	374.619	377.191	358.405
B1AQD9	Protein unc-119 homolog A OS=Mus musculus GN=Unc119 PE=1 SV=1	382.783	251.966	374.314	447.776	467.586	343.555	327.225	298.985	483.218
B1AQF4	Dual-specificity protein phosphatase 3 OS=Mus musculus GN=Dusp3 PE=1 SV=1	331.388	406.474	371.374	371.78	341.342	363.062	432.387	356.621	430.614
B1AQX7	SRC kinase-signaling inhibitor 1 OS=Mus musculus GN=Srcin1 PE=1 SV=1	357.191	355.879	387.647	382.176	382.066	398.872	359.462	370.179	377.865
B1AQX9	SRC kinase-signaling inhibitor 1 OS=Mus musculus GN=Srcin1 PE=1 SV=1	357.152	351.359	387.237	383.274	386.379	397.828	357.904	368.271	382.042
B1AQY2	Rho GTPase-activating protein 23 OS=Mus musculus GN=Arhgap23 PE=1 SV=1	323.551	363.758	355.362	401.833	348.923	422.595	398.819	379.112	419.148
B1AQZ0	Septin-8 OS=Mus musculus GN=Sept8 PE=1 SV=1	398.58	391.423	356.483	355.22	408.315	359.242	394.91	358.887	331.81
B1AQZ2	Kinesin-like protein OS=Mus musculus GN=Kif3a PE=1 SV=1	333.199	367.041	378.627	390.034	345.677	388.806	404.93	380.334	413.562
B1AR13	CDGSH iron-sulfur domain-containing protein 3, mitochondrial OS=Mus musculus GN=Cisd3 PE=1 SV=1	321.78	283.707	389.831	493.4	381.86	363.808	329.877	346.105	511.194
B1AR51	Dynein, axonemal, heavy chain 9 OS=Mus musculus GN=Dnah9 PE=1 SV=1	412.555	360.426	330.692	418.629	398.581	393.34	356.667	369.278	326.125
B1AR74	Breast carcinoma-amplified sequence 3 homolog OS=Mus musculus GN=Bcas3 PE=1 SV=1	374.268	378.286	384.888	394.178	364.107	361.731	374.891	379.76	360.001
B1ART2	Vacuolar protein sorting 13D OS=Mus musculus GN=Vps13d PE=1 SV=2	366.898	387.82	341.364	374.165	379.134	358.266	413.039	392.353	375.817
B1ARU1	Microtubule-actin cross-linking factor 1 OS=Mus musculus GN=Macf1 PE=1 SV=1	401.275	386.519	334.98	380.985	373.681	381.666	363.346	376.315	368.978
B1AS29	Glutamate receptor ionotropic, kainate 3 OS=Mus musculus GN=Grik3 PE=1 SV=1	411.59	347.769	329.593	368.426	416.512	370.112	386.787	392.494	338.976
B1AS67	Pleckstrin homology domain-containing family G member 5 OS=Mus musculus GN=Plekhg5 PE=1 SV=1	326.258	363.676	342.255	364.819	357.656	436.885	385.509	401.916	424.892
B1ASP2	Tyrosine-protein kinase OS=Mus musculus GN=Jak1 PE=1 SV=1	293.586	388.473	318.577	535.371	336.461	339.827	486.76	420.81	363.246
B1ASU0	Interleukin-1 receptor accessory protein-like 1 OS=Mus musculus GN=Il1rapl1 PE=1 SV=1	282.083	363.843	399.082	417.302	332.879	379.787	427.212	330.858	502.464
B1ASU9	Serine/threonine-protein kinase tousled-like 2 OS=Mus musculus GN=Tlk2 PE=1 SV=1	376.656	374.212	373.19	364.865	359.899	384.736	383.506	373.054	380.86
B1AT59	Archaemetzincin-2 OS=Mus musculus GN=Amz2 PE=1 SV=1	277.33	388.79	318.567	416.026	362.053	381.83	477.954	392.672	445.369
B1AT82	MCG6846, isoform CRA_c OS=Mus musculus GN=Prpsap1 PE=1 SV=1	341.358	356.416	376.67	397.203	383.742	364.16	387.364	359.476	427.794
B1ATC3	Trinucleotide repeat-containing gene 6C protein OS=Mus musculus GN=Tnrc6c PE=1 SV=1	382.072	405.047	352.187	390.364	371.685	393.025	364.494	348.869	362.248
B1ATI0	Aldehyde dehydrogenase OS=Mus musculus GN=Aldh3a2 PE=1 SV=1	473.829	398.331	295.092	326.811	437.522	338.933	386.784	358.409	312.351
B1ATI1	ATP-sensitive inward rectifier potassium channel 12 OS=Mus musculus GN=Kcnj12 PE=1 SV=1	228.632	334.8	357.737	380.017	273.402	365.657	460.216	364.467	732.175
B1AU75	Nuclear autoantigenic sperm protein OS=Mus musculus GN=Nasp PE=1 SV=1	328.024	388.171	367.179	450.093	316.402	402.436	374.867	406.996	381.673
B1AUN2	Eukaryotic translation initiation factor 2B, subunit 3 OS=Mus musculus GN=Eif2b3 PE=1 SV=1	390.657	322.285	298.596	411.278	414.457	333.408	450.381	336.372	455.392
B1AUW6	Interleukin-1 receptor-associated kinase 1 OS=Mus musculus GN=Irak1 PE=1 SV=1	338.267	224.43	446.735	571.97	355.522	308.541	263.873	342.848	566.961
B1AUY3	Rho GTPase-activating protein 4 OS=Mus musculus GN=Arhgap4 PE=1 SV=1	337.52	298.205	343.777	388.109	312.88	452.315	548.677	349.343	415.091
B1AV75	RIKEN cDNA 2610301B20 gene OS=Mus musculus GN=2610301B20Rik PE=1 SV=1	396.249	401.633	336.819	407.46	366.822	391.989	372.819	327.642	374.114
B1AVF2	TSC22 domain family protein 3 OS=Mus musculus GN=Tsc22d3 PE=1 SV=1	398.528	394.201	457.4	314.242	377.091	335.249	329.511	379.783	323.519
B1AVH5	Coronin OS=Mus musculus GN=Coro2a PE=1 SV=1	390.821	365.844	353.671	351.238	401.48	364.846	411.707	372.983	353.673
B1AVY2	Gamma-aminobutyric acid receptor subunit alpha-3 OS=Mus musculus GN=Gabra3 PE=1 SV=1	396.481	347.598	406.029	388.613	396.038	418.158	289.835	374.134	314.429
B1AVZ0	Uracil phosphoribosyltransferase homolog OS=Mus musculus GN=Uprt PE=1 SV=1	325.747	393.773	342.176	348.797	427.395	361.245	415.083	364.927	414.849
B1AWD9	Clathrin light chain OS=Mus musculus GN=Clta PE=1 SV=1	354.792	321.691	346.566	377.912	410.379	316.37	464.295	380.175	437.821
B1AWL2	Zinc finger protein 462 OS=Mus musculus GN=Zfp462 PE=1 SV=1	337.554	388.697	421.413	384.606	329.308	332.428	403.56	322.068	472.772
B1AX58	Plastin-3 OS=Mus musculus GN=Pls3 PE=1 SV=1	381.274	404.138	377.114	346.724	378.375	401.423	343.057	382.632	331.726
B1AXI6	Rho guanine nucleotide exchange factor 9 OS=Mus musculus GN=Arhgef9 PE=1 SV=1	375.407	414.458	394.673	377.545	337.517	398.042	325.035	396.588	334.151
B1AXV0	DOMON domain-containing protein FRRS1L OS=Mus musculus GN=Frrs1l PE=1 SV=1	412.164	365.859	379.47	300.142	415.676	373.21	346.764	395.708	333.607
B1AXZ4	ELAV-like protein OS=Mus musculus GN=Elavl2 PE=1 SV=1	430.157	378.181	390.817	330.899	408.526	334.236	369.757	344.5	336.894
B1AY10	Transcriptional repressor NF-X1 OS=Mus musculus GN=Nfx1 PE=1 SV=1	343.738	341.244	406.181	433.005	345.293	357.038	380.226	365.36	427.128
B1AZF3	Serine/threonine-protein kinase LMTK1 OS=Mus musculus GN=Aatk PE=1 SV=1	348.435	376.002	333.893	401.269	419.782	386.443	402.025	357.453	369.452
B1AZP2	Disks large-associated protein 4 OS=Mus musculus GN=Dlgap4 PE=1 SV=1	343.466	358.034	362.436	367.954	403.482	418.022	362.744	384.872	376.527
B1AZP2-2	Isoform 2 of Disks large-associated protein 4 OS=Mus musculus GN=Dlgap4	322.597	360.131	360.629	372.582	396.379	418.467	380.419	391.59	390.297
B1B1A8	Myosin light chain kinase, smooth muscle OS=Mus musculus GN=Mylk PE=1 SV=1	439.262	360.599	387.408	352.123	381.405	349.35	328.38	385.784	340.195
B2B9E1	Triple QxxK/R motif-containing protein OS=Mus musculus GN=Triqk PE=2 SV=1	389.981	335.841	518.032	373.792	332.144	349.409	294.875	343.9	379.239
B2KF50	UHRF1 (ICBP90)-binding protein 1 OS=Mus musculus GN=Uhrf1bp1 PE=1 SV=1	340.356	390.063	385.604	388.162	332.998	372.378	385.163	384.809	414.252
B2KFM9	SRY-box containing gene 5, isoform CRA_b OS=Mus musculus GN=Sox5 PE=1 SV=1	415.636	413.147	385.181	329.161	352.964	380.09	330.327	366.411	356.208
B2KG46	Protein bicaudal D homolog 1 OS=Mus musculus GN=Bicd1 PE=1 SV=1	328.048	370.586	350.115	337.776	367.863	414.944	392.961	389.307	444.382
B2KGF0	Ribulose-phosphate 3-epimerase OS=Mus musculus GN=Rpe PE=1 SV=1	522.637	289.293	334.411	377.483	492.889	310.984	292.098	324.527	349.854
B2M1R6	Heterogeneous nuclear ribonucleoprotein K OS=Mus musculus GN=Hnrnpk PE=1 SV=1	349.204	377.525	341.105	396.716	368.84	365.433	419.948	379.305	408.811
B2RPU2	Pleckstrin homology domain-containing family D member 1 OS=Mus musculus GN=Plekhd1 PE=1 SV=1	373.033	421.617	318.326	428.788	383.552	329.685	396.457	354.286	394.185
B2RPU6	Mdm1 protein OS=Mus musculus GN=Mdm1 PE=1 SV=1	372.585	417.396	357.852	464.433	326.493	378.531	334.207	380.789	357.842
B2RPU8	MCG130675 OS=Mus musculus GN=Zbed5 PE=2 SV=1	393.905	373.45	412.776	348.214	348.454	354.075	354.916	391.783	368.375
B2RQ80	Tnik protein OS=Mus musculus GN=Tnik PE=1 SV=1	406.513	298.583	403.54	356.486	427.724	377.129	363.215	319.658	387.054
B2RQC6	CAD protein OS=Mus musculus GN=Cad PE=1 SV=1	334.689	374.053	380.024	366.761	359.926	367.125	394.837	381.132	435.037
B2RQF5	MAM domain-containing glycosylphosphatidylinositol anchor protein 2 OS=Mus musculus GN=Mdga2 PE=1 SV=1	415.85	338.939	395.953	357.537	386.482	361.625	348.511	382.86	350.262
B2RQG2	PHD finger protein 3 OS=Mus musculus GN=Phf3 PE=1 SV=1	276.797	371.394	340.624	473.994	281.102	393.7	434.18	429.484	474.617
B2RQR5	Small G protein signaling modulator 1 OS=Mus musculus GN=Sgsm1 PE=1 SV=1	381.925	366.849	426.759	373.57	355.167	384.213	322.598	360.556	372.508
B2RQS1	Striatin-3 OS=Mus musculus GN=Strn3 PE=1 SV=1	385.766	387.593	372.426	376.119	396.276	367.979	351.462	377.766	339.333
B2RQX9	Transporter OS=Mus musculus GN=Slc6a5 PE=1 SV=1	445.319	307.918	313.312	413.249	371.325	364.216	401.754	365.293	398.361
B2RR83	Probable ATP-dependent RNA helicase YTHDC2 OS=Mus musculus GN=Ythdc2 PE=1 SV=1	428.09	391.969	370.45	324.578	423.357	337.416	343.823	382.629	317.77
B2RRE7	OTU domain-containing protein 4 OS=Mus musculus GN=Otud4 PE=1 SV=1	172.206	172.004	302.896	569.88	350.964	331.019	641.798	367.453	707.846
B2RRI2	Protein strawberry notch homolog 1 OS=Mus musculus GN=Sbno1 PE=1 SV=1	389.425	352.036	416.521	375.809	375.91	342.154	370.538	338.993	393.173
B2RS19	Max protein OS=Mus musculus GN=Max PE=1 SV=1	381.201	370.806	341.888	371.584	464.096	432.085	275.914	388.48	310.105
B2RSH2	Guanine nucleotide-binding protein G(i) subunit alpha-1 OS=Mus musculus GN=Gnai1 PE=1 SV=1	415.07	366.546	359.269	341.231	422.553	376.109	367.406	367.707	321.799
B2RSU7	GRIP and coiled-coil domain containing 2 OS=Mus musculus GN=Gcc2 PE=1 SV=1	368.015	367.093	356.714	395.703	381.246	366.032	410.217	363.127	381.043
B2RT44	LON peptidase N-terminal domain and ring finger 2 OS=Mus musculus GN=Lonrf2 PE=1 SV=1	443.113	378.453	362.314	429.405	348.832	338.594	426.871	305.041	335.634
B2RTJ2	BTB/POZ domain-containing protein KCTD21 OS=Mus musculus GN=Kctd21 PE=1 SV=1	326.221	389.252	394.506	385.635	297.822	396.79	415.426	427.034	372.162
B2RUC1	Tpd52l1 protein OS=Mus musculus GN=Tpd52l1 PE=1 SV=1	252.036	382.918	384.558	444.626	295.984	437.42	433.068	405.395	420.875
B2RUJ5	Amyloid beta A4 precursor protein-binding family A member 1 OS=Mus musculus GN=Apba1 PE=1 SV=2	395.701	359.358	382.132	356.088	392.585	371.46	389.368	366.237	340.537
B2RUR8	OTU domain-containing protein 7B OS=Mus musculus GN=Otud7b PE=1 SV=1	311.94	347.955	406.458	410.037	353.192	366.518	423.119	355.893	438.445
B2RUS7	ATP-binding cassette, sub-family C (CFTR/MRP), member 8 OS=Mus musculus GN=Abcc8 PE=1 SV=1	352.006	326.148	398.421	345.51	444.997	393.746	314.105	390.754	381.408
B2RVL6	Zinc finger CCHC domain-containing protein 24 OS=Mus musculus GN=Zcchc24 PE=1 SV=1	285.042	313.262	354.144	417.619	377.445	430.695	479.491	394.443	394.505
B2RW11	Ankyrin repeat domain 34A OS=Mus musculus GN=Ankrd34a PE=1 SV=1	348.368	362.21	375.272	409.9	321.425	407.597	393.657	383.461	399.973
B2RWC4	Gm88 protein OS=Mus musculus GN=Lrrc73 PE=1 SV=1	276.775	424.39	388.847	361.118	331.387	476.165	343.506	434.979	357.511
B2RWH8	Dimethylaniline monooxygenase [N-oxide-forming] OS=Mus musculus GN=Gm4846 PE=2 SV=1	434.76	135.271	413.833	433.238	627.284	293.625	231.691	261.151	478.51
B2RXA1	PI-PLC X domain-containing protein 2 OS=Mus musculus GN=Plcxd2 PE=2 SV=1	187.481	363.085	267.706	457.795	289.672	322.685	647.811	506.651	536.676
B2RXC1	Trafficking protein particle complex subunit 11 OS=Mus musculus GN=Trappc11 PE=1 SV=1	392.559	364.368	391.96	354.133	402.634	374.534	342.708	367.852	350.31
B2RXC2	Kinase OS=Mus musculus GN=Itpkb PE=1 SV=1	388.458	367.497	386.78	381.455	399.353	354.833	360.416	350.153	366.647
B2RXE2	Sodium/hydrogen exchanger OS=Mus musculus GN=Slc9a5 PE=1 SV=1	468.281	350.935	397.715	331.925	394.643	311.352	414.05	299.151	352.781
B2RXQ2	Ppfia1 protein OS=Mus musculus GN=Ppfia1 PE=1 SV=1	351.456	358.634	343.05	404.861	373.529	358.703	438.357	381.839	401.126
B2RXS4	Plexin-B2 OS=Mus musculus GN=Plxnb2 PE=1 SV=1	378.237	382.346	360.376	387.007	363.386	375.786	367.479	401.308	358.128
B2RY56	RNA-binding protein 25 OS=Mus musculus GN=Rbm25 PE=1 SV=2	378.239	393.292	359.797	360.998	380.457	399.193	350.68	384.687	352.315
B2RY58	Hyperpolarization-activated, cyclic nucleotide-gated K+ 4 OS=Mus musculus GN=Hcn4 PE=1 SV=1	293.628	321.859	383.771	444.121	358.322	429.347	421.82	365.986	413.576
B5B2N2	Nuclear factor of activated T-cells c1 isoform IA-IXL OS=Mus musculus GN=Nfatc1 PE=1 SV=1	375.781	330.64	359.973	341.944	354.925	376.005	408.119	416.367	419.91
B5TVM2	Immunoglobulin-like domain-containing receptor 2 OS=Mus musculus GN=Ildr2 PE=1 SV=2	344.887	374.548	348.502	413.063	363.696	390.473	388.635	382.416	397.238
B7ZBU7	Neuronal acetylcholine receptor subunit alpha-4 OS=Mus musculus GN=Chrna4 PE=1 SV=1	347.82	350.877	257.999	398.688	447.036	399.097	402.323	399.83	414.394
B7ZBV9	Potassium voltage-gated channel subfamily KQT member 2 OS=Mus musculus GN=Kcnq2 PE=1 SV=1	337.597	340.05	424.65	409.509	346.763	422.9	362.102	339.995	398.542
B7ZC24	Nuclear receptor coactivator 5 OS=Mus musculus GN=Ncoa5 PE=1 SV=1	292.151	413.827	395.993	410.473	342.546	374.263	367.202	358.44	455.764
B7ZC40	Glutaredoxin 2 (Thioltransferase), isoform CRA_a OS=Mus musculus GN=Glrx2 PE=1 SV=1	433.736	371.321	357.043	346.792	329.878	348.041	437.059	367.601	372.897
B7ZCJ1	Rho GTPase-activating protein 21 OS=Mus musculus GN=Arhgap21 PE=1 SV=1	375.416	368.305	380.148	377.831	402.54	357.719	366.519	346.409	389.135
B7ZCT1	Regulator of G-protein-signaling 19 OS=Mus musculus GN=Rgs19 PE=1 SV=1	400.656	399.006	337.172	364.941	383.331	357.427	428.328	346.856	355.216
B7ZCU0	Abl interactor 1 OS=Mus musculus GN=Abi1 PE=1 SV=1	321.563	359.663	379.955	395.31	379.08	395.805	406.645	384.794	377.957
B7ZDF5	Histone deacetylase OS=Mus musculus GN=Hdac5 PE=1 SV=1	415.869	419.641	434.72	387.988	301.808	373.439	295.719	342.956	356.387
B7ZMP1	Probable Xaa-Pro aminopeptidase 3 OS=Mus musculus GN=Xpnpep3 PE=1 SV=1	384.2	384.199	355.082	357.317	387.079	407.641	325.967	413.79	336.725
B7ZMZ7	Dip2c protein OS=Mus musculus GN=Dip2c PE=1 SV=1	353.888	369.778	365.628	381.609	376.244	382.66	395.657	386.35	374.541
B7ZNG0	Kinesin-like protein KIF7 OS=Mus musculus GN=Kif7 PE=1 SV=1	376.563	366.48	396.902	351.026	393.007	333.344	416.245	344.067	387.108
B7ZNL2	Nap1l4 protein OS=Mus musculus GN=Nap1l4 PE=1 SV=1	424.749	386.383	385.522	363.926	385.174	342.284	344.141	374.534	326.035
B7ZNU9	Beta-2-syntrophin OS=Mus musculus GN=Sntb2 PE=1 SV=1	427.69	414.615	268.584	446.496	313.245	348.452	385.285	378.281	424.832
B7ZWM6	Sorbin and SH3 domain-containing protein 2 OS=Mus musculus GN=Sorbs2 PE=1 SV=1	339.091	358.873	404.335	380.594	364.836	402.094	359.425	384.269	383.059
B8JJ69	RIKEN cDNA 2310061I04 gene OS=Mus musculus GN=2310061I04Rik PE=1 SV=1	400.503	303.543	388.813	349.927	419.721	318.232	352.243	335.295	485.411
B8JJN0	Uncharacterized protein OS=Mus musculus GN=Gm20547 PE=3 SV=1	585.74	336.047	312.216	350.283	402.822	241.406	451.53	383.337	242.526
B8JKV0	Antagonist of mitotic exit network 1 OS=Mus musculus GN=Amn1 PE=1 SV=1	326.223	403.743	380.048	386.915	281.611	374.543	479.349	374.572	418.874
B8QI34	Liprin-alpha 2 OS=Mus musculus GN=Ppfia2 PE=1 SV=1	361.441	364.242	369.013	375.929	368.559	388.483	391.388	382.535	380.403
B8QI36	Liprin-alpha 4 OS=Mus musculus GN=Ppfia4 PE=1 SV=1	380.497	400.429	356.47	348.743	389.749	372.934	398.249	370.959	346.284
B8XCJ6	Protein unc-80 homolog OS=Mus musculus GN=Unc80 PE=1 SV=1	275.104	365.287	369.221	404.125	275.497	418.219	460.407	403.563	486.915
B9EHT4	CAP-Gly domain-containing linker protein 3 OS=Mus musculus GN=Clip3 PE=1 SV=1	376.276	376.145	361.47	366.572	377.132	365.539	419.404	363.318	373.072
B9EI38	RALBP1 associated Eps domain containing protein 2 OS=Mus musculus GN=Reps2 PE=1 SV=1	378.163	393.567	362.185	382.674	354.698	400.624	360.03	388.947	348.607
B9EJ80	PDZ domain containing 8 OS=Mus musculus GN=Pdzd8 PE=1 SV=1	411.616	333.166	488.714	343.542	335.285	388.798	287.138	364.695	352.244
B9EJ86	Oxysterol-binding protein-related protein 8 OS=Mus musculus GN=Osbpl8 PE=1 SV=1	379.356	364.665	390.336	348.051	368.977	370.293	359.039	386.839	389.886
B9EJA2-2	Isoform 2 of Cortactin-binding protein 2 OS=Mus musculus GN=Cttnbp2	368.79	374.291	379.491	377.201	377.375	389.078	339.137	377.92	380.473
B9EJA3	Protein tyrosine phosphatase, receptor type, D OS=Mus musculus GN=Ptprd PE=1 SV=1	351.691	375.059	370.119	381	355.412	363.719	424.788	379.92	394.596
B9EKI3	TATA element modulatory factor OS=Mus musculus GN=Tmf1 PE=1 SV=2	351.714	407.997	349.407	445.155	339.409	392.204	391.877	379.029	348.618
B9EKR1	Receptor-type tyrosine-protein phosphatase zeta OS=Mus musculus GN=Ptprz1 PE=1 SV=1	370.321	372.828	377.74	375.528	376.988	383.567	378.803	379.275	354.438
B9EKS2	Jumonji domain containing 1B OS=Mus musculus GN=Kdm3b PE=1 SV=1	317.939	379.613	333.173	446.88	342.131	398.561	438.761	373.143	409.205
C0HK79	Adipocyte-related X-chromosome expressed sequence 1 OS=Mus musculus GN=Arxes1 PE=1 SV=1	519.407	449.196	394.924	255.395	405.795	310.183	304.42	349.128	257.667
C0HKD9	Microfibrillar-associated protein 1B OS=Mus musculus GN=Mfap1b PE=1 SV=1	442.005	317.609	366.251	337.415	401.922	291.23	431.653	337.249	429.027
C0HKE6	Histone H2A type 1-I OS=Mus musculus GN=Hist1h2ai PE=1 SV=1	431.413	414.883	389.481	341.2	328.878	334.985	337.962	381.758	372.069
D3YTP3	Metaxin 3 OS=Mus musculus GN=Mtx3 PE=1 SV=2	408.572	372.592	387.92	363.338	365.752	371.259	361.2	359.197	356.954
D3YTQ3	Heterogeneous nuclear ribonucleoprotein D-like OS=Mus musculus GN=Hnrnpdl PE=1 SV=1	413.711	396.073	366.854	374.041	362.656	365.148	354.495	387.293	328.873
D3YTR0	Adenomatous polyposis coli protein 2 OS=Mus musculus GN=Apc2 PE=1 SV=1	334.301	355.089	441.146	380.52	359.58	375.975	353.99	361.336	408.445
D3YTS1	Signal peptidase complex catalytic subunit SEC11 OS=Mus musculus GN=Sec11a PE=1 SV=1	355.698	437.635	421.142	323.383	352.889	373.351	367.376	372.297	342.537
D3YTT6	Oxysterol-binding protein OS=Mus musculus GN=Osbpl3 PE=1 SV=1	327.52	348.868	356.792	409.338	406.13	406.36	302.246	399.996	431.281
D3YTU0	Vesicle-associated membrane protein 1 OS=Mus musculus GN=Vamp1 PE=1 SV=1	375.298	375.505	322.955	403.331	348.261	410.895	389.153	364.471	408.299
D3YU11	CUGBP Elav-like family member 6 OS=Mus musculus GN=Celf6 PE=1 SV=1	373.343	322.499	380.251	336.12	318.03	420.527	451.535	402.191	383.101
D3YU22	LIM and calponin homology domains-containing protein 1 OS=Mus musculus GN=Limch1 PE=1 SV=1	390.446	354.105	392.688	374.442	379.593	397.478	349.35	349.388	364.249
D3YUE4	Family with sequence similarity 151, member B OS=Mus musculus GN=Fam151b PE=1 SV=1	359.493	452.884	309.269	338.547	246.586	346.661	495.682	371.441	513.281
D3YUJ3	Cyclin Y-like 1 OS=Mus musculus GN=Ccnyl1 PE=1 SV=1	341.049	399.773	389.272	356.796	393.976	353.395	380.785	381.569	375.351
D3YUP0	Vacuolar protein sorting-associated protein 8 homolog OS=Mus musculus GN=Vps8 PE=1 SV=1	377.045	367.69	360.788	361.884	404.869	384.45	376.281	373.497	357.7
D3YUP1	Histone-arginine methyltransferase CARM1 OS=Mus musculus GN=Carm1 PE=1 SV=1	346.057	362.068	368.912	366.049	367.238	406.057	412.886	363.973	397.44
D3YUQ5	Gene model 440, (NCBI) OS=Mus musculus GN=Rundc3b PE=1 SV=1	322.859	405.934	367.527	399.437	362.776	376.696	388.416	398.726	378.39
D3YUV1	Nuclear receptor-binding protein OS=Mus musculus GN=Nrbp1 PE=1 SV=1	406.661	359.983	427.777	284.898	433.55	358.264	355.003	354.26	325.437
D3YUV9	Eukaryotic translation initiation factor 4E type 2 OS=Mus musculus GN=Eif4e2 PE=1 SV=1	444.004	370.62	375.753	319.888	455.738	340.96	330.036	363.293	303.233
D3YUY7	Tripartite motif protein 3, isoform CRA_a OS=Mus musculus GN=Trim3 PE=1 SV=2	383.188	409.283	364.75	376.579	358.987	405.169	359.207	379.938	323.782
D3YUZ8	Disks large homolog 2 OS=Mus musculus GN=Dlg2 PE=1 SV=1	340.931	372.808	381.891	390.265	366.445	391.411	385.8	391.86	366.028
D3YVE8	Solute carrier family 35 member G2 OS=Mus musculus GN=Slc35g2 PE=1 SV=1	354.125	352.608	466.608	365.242	375.277	377.168	283.268	380.829	378.786
D3YVV3	Ankyrin repeat domain 29 OS=Mus musculus GN=Ankrd29 PE=1 SV=1	432.249	380.386	371.891	342.03	403.517	320.227	386.629	336.884	363.404
D3YVV7	Neuro-oncological ventral antigen 2 OS=Mus musculus GN=Nova2 PE=1 SV=3	357.744	338.844	416.808	396.995	382.952	366.984	369.861	367.778	372.354
D3YVW2	Golgi integral membrane protein 4 OS=Mus musculus GN=Golim4 PE=1 SV=1	327.425	255.49	406.863	524.345	382.777	334.957	422.434	329.901	454.091
D3YVY0	E3 ubiquitin-protein ligase MARCH1 OS=Mus musculus GN=March1 PE=1 SV=1	294.906	339.454	311.319	474.768	414.344	481.596	279.898	404.9	419.976
D3YW42	Coiled-coil domain-containing protein 9 OS=Mus musculus GN=Ccdc9 PE=1 SV=2	230.987	345.166	264.858	484.024	332.629	356.802	539.939	409.922	577.472
D3YW47	Podocalyxin-like protein 2 OS=Mus musculus GN=Podxl2 PE=1 SV=2	402.97	384.739	387.821	332.024	368.723	379.39	337.349	368.373	375.721
D3YWB9	Contactin-associated protein-like 4 OS=Mus musculus GN=Cntnap4 PE=1 SV=1	360.516	362.338	393.405	368.444	390.331	373.985	377.285	389.355	350.645
D3YWD3	Transmembrane protein 245 OS=Mus musculus GN=Tmem245 PE=1 SV=1	271.953	340.23	390.052	486.003	321.418	409.293	354.842	382.846	490.244
D3YWJ4	Protein farnesyltransferase subunit beta OS=Mus musculus GN=Fntb PE=1 SV=1	380.272	374.994	364.345	407.793	328.37	385.372	397.945	385.127	364.254
D3YWN7	Ensconsin OS=Mus musculus GN=Map7 PE=1 SV=2	326.824	303.865	425.079	379.873	367.252	389.293	359.211	347.798	488.011
D3YWQ0	Diacylglycerol kinase OS=Mus musculus GN=Dgki PE=1 SV=1	368.706	378.367	361.512	385.451	368.265	371.712	369.567	394.462	380.859
D3YWS8	Leukocyte receptor cluster (LRC) member 8, isoform CRA_a OS=Mus musculus GN=Leng8 PE=1 SV=1	338.657	392.664	403.306	420.826	306.467	473.791	357.392	341.356	351.103
D3YWX2	YLP motif-containing protein 1 OS=Mus musculus GN=Ylpm1 PE=1 SV=2	366.536	369.206	363.147	389.422	355.075	357.313	384.989	378.643	425.157
D3YX85	Arf-GAP with SH3 domain, ANK repeat and PH domain-containing protein 2 OS=Mus musculus GN=Asap2 PE=1 SV=2	357.155	370.406	391.486	381.688	385.261	368.673	348.059	371.664	394.178
D3YX87	Protein misato homolog 1 OS=Mus musculus GN=Msto1 PE=1 SV=1	330.752	365.072	356.012	465.395	282.414	335.042	440.421	368.113	509.268
D3YXH0	Immunoglobulin superfamily member 5 OS=Mus musculus GN=Igsf5 PE=4 SV=1	351.657	343.012	320.225	383.713	386.803	283.229	585.263	347.344	445.135
D3YXJ0	Diacylglycerol kinase OS=Mus musculus GN=Dgkh PE=1 SV=1	368.129	385.286	377.067	360.369	385.924	358.221	387.004	353.438	394.036
D3YXK0	Janus kinase and microtubule-interacting protein 2 OS=Mus musculus GN=Jakmip2 PE=1 SV=2	391.53	383.72	384.144	353.29	352.054	351.604	380.063	405.99	356.885
D3YXM8	Mitogen-activated protein kinase kinase kinase 10 OS=Mus musculus GN=Map3k10 PE=1 SV=1	344.507	382.599	398.644	388.601	365.375	400.047	370.951	383.41	340.677
D3YXR8	RIMS-binding protein 2 OS=Mus musculus GN=Rimbp2 PE=1 SV=1	324.218	386.25	362.289	419.088	367.361	416.077	392.839	387.684	348.198
D3YY09	Dr1-associated corepressor OS=Mus musculus GN=Drap1 PE=1 SV=1	388.84	448.375	388.007	386.078	320.402	391.977	339.881	409.172	278.039
D3YY44	Zinc finger protein neuro-d4 OS=Mus musculus GN=Dpf1 PE=1 SV=1	355.429	442.231	369.266	386.685	316.267	400.391	353.992	380.951	374.586
D3YY86	Zinc finger MYND domain-containing protein 11 (Fragment) OS=Mus musculus GN=Zmynd11 PE=1 SV=1	349.84	340.432	377.53	459.674	359.087	363.178	344.826	352.587	456.461
D3YYH0	PEX5-related protein OS=Mus musculus GN=Pex5l PE=1 SV=1	404.925	375.431	407.958	365.061	375.768	360.786	356.714	364.408	327.584
D3YYI7	Probable E3 ubiquitin-protein ligase RNF217 OS=Mus musculus GN=Rnf217 PE=3 SV=2	326.776	407.729	271.997	584.386	316.061	372.868	390.706	425.672	380.791
D3YYL7	Uncharacterized protein OS=Mus musculus GN=Gm10126 PE=4 SV=2	399.958	449.858	346.186	460.366	412.185	339.377	355.466	351.636	246.979
D3YYM4	WD repeat-containing protein 72 OS=Mus musculus GN=Wdr72 PE=1 SV=1	439.866	344.24	364.621	323.955	439.898	353.286	402.779	338.262	321.548
D3YYQ8	Dynein, axonemal, heavy chain 10 OS=Mus musculus GN=Dnah10 PE=1 SV=2	618.32	376.193	365.123	234.728	422.014	292.128	267.516	288.735	347.604
D3YYS6	Monoglyceride lipase OS=Mus musculus GN=Mgll PE=1 SV=1	360.869	395.923	319.147	334.147	441.683	421.457	377.388	388.755	325.579
D3YYT1	Putative oxidoreductase GLYR1 OS=Mus musculus GN=Glyr1 PE=1 SV=1	396.821	391.334	368.403	378.383	378.734	345.356	373.077	328.911	401.685
D3YYY8	Rho guanine nucleotide exchange factor (GEF) 26 OS=Mus musculus GN=Arhgef26 PE=1 SV=1	358.507	366.77	345.529	387.492	339.464	434.672	378.189	344.783	440.468
D3YZ62	Unconventional myosin-Va OS=Mus musculus GN=Myo5a PE=1 SV=1	412.727	370.166	393.875	352.787	390.455	369.762	343.456	355.667	344.062
D3YZC8	Bromodomain-containing protein 8 OS=Mus musculus GN=Brd8 PE=1 SV=1	314.632	379.197	397.173	399.003	312.334	393.539	375.678	423.957	410.064
D3YZD8	Mth938 domain-containing protein OS=Mus musculus GN=Aamdc PE=1 SV=1	316.745	354.643	377.767	354.367	369.148	361.729	427.411	396.017	449.124
D3YZI9	PiggyBac transposable element-derived 5 OS=Mus musculus GN=Pgbd5 PE=1 SV=1	365.85	411.748	376.169	414.727	367.723	364.698	374.2	340.47	362.483
D3YZK4	Transcription initiation factor TFIID subunit OS=Mus musculus GN=Taf1 PE=1 SV=1	162.343	345.032	291.144	451.927	320.122	381.629	662.212	454.519	506.606
D3YZP9	Coiled-coil domain-containing protein 6 OS=Mus musculus GN=Ccdc6 PE=1 SV=1	399.658	383.387	367.006	383.342	361.719	377.473	350.314	369.571	366.747
D3YZR2	Pro-neuregulin-2, membrane-bound isoform OS=Mus musculus GN=Nrg2 PE=1 SV=1	393.844	387.467	313.175	397.331	380.051	363.378	359.582	373.177	414.91
D3YZU5	SH3 and multiple ankyrin repeat domains protein 1 OS=Mus musculus GN=Shank1 PE=1 SV=1	340.893	366.506	346.041	428.63	357.075	363.741	424.543	376.272	416.65
D3YZW1	SLIT-ROBO Rho GTPase-activating protein 1 OS=Mus musculus GN=Srgap1 PE=1 SV=1	389.632	378.798	392.558	308.809	408.448	361.26	367.317	361.151	368.077
D3YZZ5	Transmembrane p24-trafficking protein 7 OS=Mus musculus GN=Tmed7 PE=1 SV=1	364.383	401.636	385.01	378.983	392.893	356.968	365.915	403.14	312.741
D3Z041	Long-chain-fatty-acid--CoA ligase 1 OS=Mus musculus GN=Acsl1 PE=1 SV=1	392.687	362.493	364.806	362.2	391.411	363.518	375.345	381.457	366.937
D3Z0L4	MICOS complex subunit (Fragment) OS=Mus musculus GN=Chchd3 PE=1 SV=1	419.594	347.971	369.952	362.047	406.53	356.656	334.573	357.587	385.565
D3Z0M9	DEAD (Asp-Glu-Ala-Asp) box polypeptide 23 OS=Mus musculus GN=Ddx23 PE=1 SV=1	374.883	351.497	335.65	393.766	369.863	337.106	437.219	393.086	411.455
D3Z0X5	Pleckstrin homology-like domain family B member 1 OS=Mus musculus GN=Phldb1 PE=1 SV=1	339.843	358.118	356.337	411.005	357.953	357.658	447.074	378.374	412.444
D3Z0Y8	Ubiquitin thioesterase OTUB2 OS=Mus musculus GN=Otub2 PE=1 SV=1	360.705	445.636	425.449	295.502	363.262	381.715	335.225	353.697	368.031
D3Z183	Major facilitator superfamily domain-containing protein 6 OS=Mus musculus GN=Mfsd6 PE=1 SV=1	341.146	452.354	343.872	363.611	465.68	376.605	349.596	382.7	281.22
D3Z1M4	Calcium-binding protein 1 OS=Mus musculus GN=Cabp1 PE=1 SV=1	191.431	350.268	359.014	458.878	369.924	370.72	462.878	445.848	488.931
D3Z1P7	Myelin transcription factor 1-like protein OS=Mus musculus GN=Myt1l PE=1 SV=2	374.598	341.463	374.503	329.379	307.018	361.877	285.971	451.594	544.083
D3Z1Z1	Paraplegin OS=Mus musculus GN=Spg7 PE=1 SV=2	309.888	381.314	350.614	390.854	335.035	362.356	470.447	388.692	447.532
D3Z286	Transmembrane protein with metallophosphoesterase domain OS=Mus musculus GN=Tmppe PE=1 SV=2	330.446	410.472	392.366	363.214	353.213	451.211	319.415	421.968	321.204
D3Z2E9	RIKEN cDNA 2010107G23 gene (Fragment) OS=Mus musculus GN=2010107G23Rik PE=1 SV=8	386.258	238.112	365.962	470.584	461.955	360.604	336.183	331.992	432.178
D3Z2G0	Ankyrin repeat domain 29 (Fragment) OS=Mus musculus GN=Ankrd29 PE=1 SV=1	370.47	384.267	341.12	413.469	215.972	393.5	521.868	304.941	503.309
D3Z357	Histone-lysine N-methyltransferase OS=Mus musculus GN=Nsd3 PE=1 SV=1	393.527	355.689	380.073	429.013	319.368	343.529	382.701	381.472	402.555
D3Z383	Mesoderm specific transcript, isoform CRA_a OS=Mus musculus GN=Mest PE=1 SV=2	398.543	440.216	407.754	303.359	383.093	387.182	298.35	376.988	311.701
D3Z3C1	Fas apoptotic inhibitory molecule 1 OS=Mus musculus GN=Faim PE=1 SV=2	395.682	385.204	352.036	357.562	361.318	382.909	398.706	405.38	327.594
D3Z3M7	CAP-Gly domain-containing linker protein 1 OS=Mus musculus GN=Clip1 PE=1 SV=1	375.613	391.126	386.966	370.285	372.502	392.365	332.206	385.376	346.308
D3Z3N4	Heterogeneous nuclear ribonucleoprotein H3 OS=Mus musculus GN=Hnrnph3 PE=1 SV=1	370.514	436.747	354.976	350.376	316.824	408.109	370.187	385.534	380.015
D3Z3Q3	Smoothelin OS=Mus musculus GN=Smtn PE=1 SV=1	463.298	371.936	382.706	352.405	387.191	410.416	265.616	366.265	296.078
D3Z423	RING finger protein 212B OS=Mus musculus GN=Rnf212b PE=4 SV=1	383.484	392.815	379.037	356.346	419.96	367.969	364.257	380.452	300.511
D3Z4E2	Neuritin OS=Mus musculus GN=Nrn1 PE=1 SV=1	402.438	380.861	379.688	416.468	332.564	448.749	298.238	380.279	310.672
D3Z4E6	Vezatin OS=Mus musculus GN=Vezt PE=1 SV=1	314.433	412.138	315.535	455.428	350.523	443.274	409.492	370.191	361.583
D3Z4P2	Lectin, mannose-binding 2-like, isoform CRA_b OS=Mus musculus GN=Lman2l PE=1 SV=1	227.604	449.168	266.136	458.184	270.559	366.979	598.159	504.589	395.98
D3Z4S3	Putative peptidyl-tRNA hydrolase PTRHD1 OS=Mus musculus GN=Ptrhd1 PE=1 SV=1	382.568	394.429	362.713	340.92	344.912	411.87	342.82	424.952	351.716
D3Z4T1	CUGBP, Elav-like family member 5 OS=Mus musculus GN=Celf5 PE=1 SV=1	321.383	395.476	338.686	353.218	410.176	411.301	419.666	394.938	350.4
D3Z4U5	Janus kinase and microtubule-interacting protein 1 OS=Mus musculus GN=Jakmip1 PE=1 SV=1	403.272	356.551	374.666	371.307	398.069	344.916	369.861	356.015	380.663
D3Z532	Kalirin OS=Mus musculus GN=Kalrn PE=1 SV=1	349.072	380.473	386.247	342.592	386.037	396.496	398.673	379.172	350.417
D3Z5F7	Uncharacterized protein OS=Mus musculus GN=Gm20521 PE=4 SV=1	367.973	390.948	317.821	403.488	392.235	340.849	427.094	380.873	381.764
D3Z5I1	Zinc finger CCCH-type antiviral protein 1 OS=Mus musculus GN=Zc3hav1 PE=1 SV=1	326.322	345.119	371.732	469.74	312.197	369.166	361.517	408.258	464.98
D3Z5J3	Sorbin and SH3 domain-containing protein 1 OS=Mus musculus GN=Sorbs1 PE=1 SV=1	384.657	382.65	392.923	362.87	376.926	374.521	342.859	366.199	365.869
D3Z5M6	Adhesion G protein-coupled receptor L3 OS=Mus musculus GN=Adgrl3 PE=1 SV=1	350.776	337.176	349.563	382.768	389.533	384.967	403.484	365.159	435.222
D3Z5N6	Zinc finger protein ubi-d4 OS=Mus musculus GN=Dpf2 PE=1 SV=1	315.592	322.94	222.918	337.819	540.337	447.641	400.011	401.988	424.556
D3Z5V4	Family with sequence similarity 124, member A OS=Mus musculus GN=Fam124a PE=1 SV=1	367.309	400.875	376.32	373.543	391.229	384.11	298.251	411.217	347.777
D3Z649	Potassium channel, subfamily T, member 2 OS=Mus musculus GN=Kcnt2 PE=1 SV=1	388.907	345.027	436.669	298.107	351.027	324.322	380.483	377.607	440.858
D3Z656	Synaptojanin-1 OS=Mus musculus GN=Synj1 PE=1 SV=1	377.52	373.993	410.96	349.304	384.373	387.932	343.19	368.447	346.176
D3Z687	RIKEN cDNA 0610010K14 gene OS=Mus musculus GN=0610010K14Rik PE=1 SV=2	403.566	383.621	343.868	384.839	379.755	353.501	350.083	374.66	390.656
D3Z6G3	Microtubule-associated protein RP/EB family member 3 OS=Mus musculus GN=Mapre3 PE=1 SV=1	409.709	402.476	386.864	294.868	446.45	376.873	336.936	363.362	288.518
D3Z6I8	Tropomyosin alpha-3 chain OS=Mus musculus GN=Tpm3 PE=1 SV=1	431.483	387.592	398.349	361.505	365.193	380.14	322.68	351.233	324.226
D3Z742	MCG125361, isoform CRA_a OS=Mus musculus GN=Mb21d2 PE=1 SV=1	365.765	452.139	333.082	344.448	337.59	404.651	338.618	424.498	368.938
D3Z780	Translation initiation factor eIF-2B subunit delta OS=Mus musculus GN=Eif2b4 PE=1 SV=1	382.694	341.437	416.527	359.235	359.951	399.902	350.076	374.58	365.155
D3Z7D3	Disco-interacting protein 2 homolog A OS=Mus musculus GN=Dip2a PE=1 SV=1	377.281	372.956	376.115	367.258	366.021	380.927	366.134	384.113	375.45
D3Z7H4	Germ cell-specific gene 1-like protein OS=Mus musculus GN=Gsg1l PE=1 SV=2	435.479	360.103	380.607	348.296	366.116	334.11	358.592	426.731	325.98
D3Z7P3	Glutaminase kidney isoform, mitochondrial OS=Mus musculus GN=Gls PE=1 SV=1	388.11	371.833	388.528	350.828	385.907	380.154	350.384	370.221	361.198
D3Z7P3-2	Isoform 2 of Glutaminase kidney isoform, mitochondrial OS=Mus musculus GN=Gls	381.733	369.21	386.635	355.835	385.056	384.234	353.344	370.526	365.995
D3Z7Q2	Small integral membrane protein 20 OS=Mus musculus GN=Smim20 PE=1 SV=1	313.05	374.235	352.025	379.916	342.441	456.245	410.948	383.547	400.814
D3Z7X0	Acyl-Coenzyme A dehydrogenase family, member 12 OS=Mus musculus GN=Acad12 PE=1 SV=1	375.658	424.298	404.378	326.296	364.4	377.488	319.893	422.453	318.317
D4AFX7	DnaJ heat shock protein family (Hsp40) member C13 OS=Mus musculus GN=Dnajc13 PE=1 SV=1	360.043	378.041	365.283	361.806	373.731	377.208	408.416	382.304	374.906
D6REG4	Glyoxylate reductase/hydroxypyruvate reductase OS=Mus musculus GN=Grhpr PE=1 SV=1	392.191	386.879	370.272	366.479	361.099	376.081	376.259	380.942	351.325
D6RI20	Haloacid dehalogenase-like hydrolase domain-containing protein 2 OS=Mus musculus GN=Hdhd2 PE=4 SV=1	459.546	400.503	393.952	299.869	489.392	376.384	230.221	383.961	219.351
D6RJJ8	Ubiquinone biosynthesis protein COQ4 homolog, mitochondrial OS=Mus musculus GN=Coq4 PE=1 SV=1	349.496	327.675	365.862	429.777	320.721	438.426	519.82	379.066	296.508
D9HP81	Regulating synaptic membrane exocytosis 2 OS=Mus musculus GN=Rims2 PE=1 SV=1	365.792	322.279	407.291	409.409	395.265	362.01	347.718	353.912	406.523
E0CX20	Protein BUD31 homolog OS=Mus musculus GN=Bud31 PE=1 SV=1	422.743	378.05	366.589	413.261	385.008	321.3	383.023	356.318	333.062
E0CX32	Coiled-coil domain-containing protein 85A OS=Mus musculus GN=Ccdc85a PE=1 SV=1	407.448	366.631	361.8	334.419	388.581	386.516	378.22	392.677	330.461
E0CXB9	Catenin alpha-2 OS=Mus musculus GN=Ctnna2 PE=1 SV=1	389.147	375.002	371.737	359.813	373.903	387.82	357.834	394.75	345.802
E0CXD4	Protocadherin 1 OS=Mus musculus GN=Pcdh1 PE=1 SV=1	364.856	346.329	405.41	327.219	440.203	374.886	354.821	335.519	393.564
E0CYH0	MCG16685, isoform CRA_d OS=Mus musculus GN=Wtap PE=1 SV=1	429.898	316.328	420.795	425.825	420.595	314.552	305.762	323.577	373.836
E0CYM8	Tyrosine-protein phosphatase non-receptor type substrate 1 OS=Mus musculus GN=Sirpa PE=1 SV=1	365.297	359.876	335.73	357.608	418.866	397.896	386.517	390.809	363.409
E0CYV0	Protein-L-isoaspartate O-methyltransferase OS=Mus musculus GN=Pcmt1 PE=1 SV=1	381.467	381.625	376.467	378.259	365.474	391.025	358.2	368.86	361.535
E0CZ26	Potassium channel tetramerisation domain containing 18, isoform CRA_a OS=Mus musculus GN=Kctd18 PE=1 SV=1	254.605	275.535	353.158	471.332	237.027	397.389	465.498	443.827	614.267
E0CZ72	Kinesin-like protein OS=Mus musculus GN=Kif2a PE=1 SV=1	364.909	384.168	448.106	346.687	373.799	430.42	336.835	322.12	323.749
E0CZB3	Ubiquitin-like protein 5 OS=Mus musculus GN=Ubl5 PE=1 SV=1	518.013	284.779	436.375	344.628	532.284	253.108	271.985	295.02	312.404
E9PU87	Serine/threonine-protein kinase SIK3 OS=Mus musculus GN=Sik3 PE=1 SV=1	380.886	365.116	359.658	365.234	400.396	369.636	390.211	377.706	359.323
E9PUC5	PH and SEC7 domain-containing protein 3 OS=Mus musculus GN=Psd3 PE=1 SV=1	352.805	375.808	404.743	383.461	365.343	404.957	324.879	394.383	354.952
E9PUD2	Dynamin-1-like protein OS=Mus musculus GN=Dnm1l PE=1 SV=1	369.048	381.31	379.883	383.205	352.151	378.086	375.877	378.538	377.459
E9PUE1	R3H and coiled-coil domain-containing protein 1 OS=Mus musculus GN=R3hcc1 PE=1 SV=2	422.558	369.035	310.926	283.197	506.647	430.69	311.722	396.697	274.889
E9PUE3	Endothelin-converting enzyme 2 OS=Mus musculus GN=Ece2 PE=1 SV=1	386.611	425.518	246.566	409.713	374.381	418.423	436.597	325.759	391.484
E9PUH7	Nuclear factor 1 OS=Mus musculus GN=Nfix PE=1 SV=1	401.709	362.516	373.133	344.091	413.859	315.763	347.059	349.448	440.616
E9PUI5	Formin-binding protein 1-like OS=Mus musculus GN=Fnbp1l PE=1 SV=1	365.327	424.51	351.764	384.448	337.623	411.001	358.882	386.598	357.825
E9PUJ6	E3 ubiquitin-protein ligase MYCBP2 OS=Mus musculus GN=Mycbp2 PE=1 SV=1	351.829	363.471	372.61	410.009	336.359	386.338	397.361	396.929	384.686
E9PUL5	Proline-rich transmembrane protein 2 OS=Mus musculus GN=Prrt2 PE=1 SV=1	399.954	198.794	330.376	457.374	612.574	367.715	254.484	262.958	465.865
E9PUQ0	Ephrin type-A receptor 5 OS=Mus musculus GN=Epha5 PE=1 SV=1	318.845	420.725	363.978	407.915	349.469	431.943	346.692	412.886	340.964
E9PUQ5	Golgin subfamily A member 2 OS=Mus musculus GN=Golga2 PE=1 SV=1	337.677	382.661	318.852	425.206	360.203	352.678	444.232	397.137	412.585
E9PUQ8	Diacylglycerol kinase OS=Mus musculus GN=Dgkd PE=1 SV=1	330.984	374.584	345.354	402.219	349.062	371.824	453.042	394.169	402.506
E9PUR0	Ankyrin repeat and KH domain-containing 1 OS=Mus musculus GN=Ankhd1 PE=1 SV=1	341.464	382.47	372.573	421.646	359.264	386.134	400.255	344.034	393.202
E9PUT6	Small integral membrane protein 19 OS=Mus musculus GN=Smim19 PE=1 SV=1	311.799	304.364	383.753	471.556	380.216	379.688	307.008	326.295	553.686
E9PUU4	Gem-associated protein 5 OS=Mus musculus GN=Gemin5 PE=1 SV=1	315.233	400.976	376.981	395.466	339.547	406.225	377.99	396.67	393.05
E9PUW7	Exportin-7 OS=Mus musculus GN=Xpo7 PE=1 SV=1	364.457	371.378	380.891	378.895	368.62	372.867	390.276	372.261	377.693
E9PUZ5	PRKCA-binding protein OS=Mus musculus GN=Pick1 PE=1 SV=1	328.671	337.19	390.931	353.157	444.782	405.583	341.427	375.189	387.449
E9PV14	Band 4.1-like protein 1 (Fragment) OS=Mus musculus GN=Epb41l1 PE=1 SV=1	376.839	353.959	402.332	367.511	374.865	385.364	379.809	355.406	364.139
E9PV22	Leucine-rich repeat-containing protein 47 OS=Mus musculus GN=Lrrc47 PE=1 SV=1	331.464	368.157	353.598	383.233	346.323	392.151	437.286	400.51	401.381
E9PV24	Fibrinogen alpha chain OS=Mus musculus GN=Fga PE=1 SV=1	430.713	386.183	381.504	348.702	374.379	349.956	385.05	359.403	320.688
E9PV26	Proline-rich 36 OS=Mus musculus GN=Prr36 PE=1 SV=1	320.771	333.595	409.887	427.195	325.019	385.097	379.888	388.782	440.141
E9PV41	Protein diaphanous homolog 1 OS=Mus musculus GN=Diaph1 PE=1 SV=1	402.567	372.146	432.89	346.25	367.03	361.639	333.217	353.932	357.511
E9PV45	Ubiquitin carboxyl-terminal hydrolase 24 OS=Mus musculus GN=Usp24 PE=1 SV=1	403.937	374.279	437.696	360.738	358.251	395.312	303.309	353.957	333.323
E9PV48	Interferon-induced protein with tetratricopeptide repeats 3B OS=Mus musculus GN=Ifit3b PE=1 SV=1	365.032	398.715	287.024	361.143	344.906	477.972	484.131	367.31	325.026
E9PV86	Multiple C2 domains, transmembrane 1 OS=Mus musculus GN=Mctp1 PE=1 SV=1	327.64	389.548	334.611	375.152	359.735	362.448	467.948	395.766	410.061
E9PVA6	ARF GTPase-activating protein GIT2 OS=Mus musculus GN=Git2 PE=1 SV=1	257.65	335.417	318.137	478.397	333.181	426.546	419.781	398.733	516.555
E9PVA8	eIF-2-alpha kinase activator GCN1 OS=Mus musculus GN=Gcn1 PE=1 SV=1	379.718	397.263	374.497	352.07	350.381	375.457	364.03	390.093	379.29
E9PVB5	Tetratricopeptide repeat protein 17 OS=Mus musculus GN=Ttc17 PE=1 SV=1	385.124	336.156	407.685	385.084	322.23	359.837	411.899	378.602	392.36
E9PVC5	Eukaryotic translation initiation factor 4 gamma 1 OS=Mus musculus GN=Eif4g1 PE=1 SV=1	370.825	376.461	386.248	375.495	338.14	375.92	369.921	362.729	419.766
E9PVD3	Protocadherin-16 OS=Mus musculus GN=Dchs1 PE=1 SV=1	368.43	356.277	346.424	304.845	409.397	383.558	389.207	386.43	422.234
E9PVE8	Pituitary adenylate cyclase-activating polypeptide type I receptor OS=Mus musculus GN=Adcyap1r1 PE=1 SV=1	348.828	366.527	368.605	366.794	375.521	426.915	341.57	384.848	394.146
E9PVG8	RIKEN cDNA 9530053A07 gene OS=Mus musculus GN=9530053A07Rik PE=1 SV=1	68.7684	362.027	234.727	439.114	238.194	468.953	711.596	470.757	661.793
E9PVM3	Type II inositol 3,4-bisphosphate 4-phosphatase OS=Mus musculus GN=Inpp4b PE=1 SV=1	395.809	385.571	341.61	438.535	346.484	326.005	447.085	365.348	356.219
E9PVN6	Uncharacterized protein OS=Mus musculus GN=Gm20498 PE=1 SV=1	392.935	331.752	366.512	340.31	468.979	344.085	369.454	369.849	360.994
E9PVP0	PCTP-like protein OS=Mus musculus GN=Stard10 PE=1 SV=1	379.809	379.801	335.063	351.56	367.555	356.644	432.164	392.174	393.073
E9PVQ3	SPATS2-like protein OS=Mus musculus GN=Spats2l PE=1 SV=1	300.927	375.665	426.346	403.096	350.652	367.75	359.627	369.373	443.615
E9PVU0	Unconventional myosin-VI OS=Mus musculus GN=Myo6 PE=1 SV=1	403.673	360.028	382.812	368.269	382.406	372.552	390.945	368.512	324.246
E9PVU7	Phosphodiesterase OS=Mus musculus GN=Pde4d PE=1 SV=1	420.828	324.405	396.832	305.912	450.566	361.679	325.223	376.92	348.178
E9PVV5	E3 ubiquitin-protein ligase TRIM50 OS=Mus musculus GN=Trim50 PE=4 SV=1	199.579	252.701	348.103	430.211	273.838	411.138	653.958	360.384	628.449
E9PVZ8	Golgi autoantigen, golgin subfamily b, macrogolgin 1 OS=Mus musculus GN=Golgb1 PE=1 SV=1	392.162	348.434	393.397	385.683	383.793	357.344	344.782	349.184	401.916
E9PW07	Voltage-dependent calcium channel beta subunit-associated regulatory protein OS=Mus musculus GN=Cbarp PE=1 SV=2	373.35	353.519	405.782	348.776	370.225	408.56	377.303	370.164	347.219
E9PW34	Ryanodine receptor 3 OS=Mus musculus GN=Ryr3 PE=1 SV=1	377.402	346.837	393.464	330.922	395.735	378.44	361.395	384.512	381.646
E9PW37	RAS protein activator-like 2 OS=Mus musculus GN=Rasal2 PE=1 SV=1	362.317	381.029	353.668	373.038	370.792	397.592	403.653	371.79	370.685
E9PW43	Predicted pseudogene 10320 OS=Mus musculus GN=Gm10320 PE=4 SV=1	412.929	317.654	375.288	323.555	460.905	293.679	447.489	322.978	397.06
E9PW66	Nucleosome assembly protein 1-like 1 OS=Mus musculus GN=Nap1l1 PE=1 SV=1	422.461	391.051	359.544	353.145	407.132	377.146	336.682	387.576	295.356
E9PW83	Family with sequence similarity 184, member A OS=Mus musculus GN=Fam184a PE=1 SV=1	412.984	407.915	365.213	364.543	395.905	456.248	286.598	336.85	294.697
E9PWB2	Casein kinase I isoform alpha OS=Mus musculus GN=Csnk1a1 PE=1 SV=1	367.836	386.247	391.099	321.174	422.188	376.49	338.862	381.565	353.165
E9PWD2	Thrombospondin type-1 domain-containing protein 7A OS=Mus musculus GN=Thsd7a PE=1 SV=1	390.994	352.303	404.497	373.914	392.093	348.536	354.051	356.901	376.917
E9PWG2	Trafficking protein particle complex 8 OS=Mus musculus GN=Trappc8 PE=1 SV=1	350.084	380.621	382.957	381.669	385.883	363.37	376.477	383.797	372.457
E9PWM3	Armadillo repeat-containing, X-linked 4 OS=Mus musculus GN=Armcx4 PE=1 SV=1	291.807	346.241	403.279	393.396	324.382	382.803	435.424	414.38	434.763
E9PWN0	Phosphatidate phosphatase LPIN2 OS=Mus musculus GN=Lpin2 PE=1 SV=1	291.987	390.784	367.893	422.14	346.468	428.619	343.265	403.831	419.573
E9PWP9	RIKEN cDNA 4931408C20 gene OS=Mus musculus GN=4931408C20Rik PE=4 SV=1	313.066	420.23	567.58	469.622	329.024	296.537	263.526	383.113	297.274
E9PWQ3	Collagen, type VI, alpha 3 OS=Mus musculus GN=Col6a3 PE=1 SV=2	368.633	415.317	395.589	346.388	325.831	400.519	401.481	372.599	338.686
E9PWR4	Disco-interacting protein 2 homolog C OS=Mus musculus GN=Dip2c PE=1 SV=1	354.167	369.721	363.865	381.206	374.458	382.429	396.674	387.72	377.128
E9PWW9	Remodeling and spacing factor 1 OS=Mus musculus GN=Rsf1 PE=1 SV=2	341.516	392.966	382.397	386.101	347.801	357.048	401.467	363.135	422.603
E9PWX1	Dipeptidyl aminopeptidase-like protein 6 OS=Mus musculus GN=Dpp6 PE=1 SV=1	413.604	377.258	378.317	339.619	407.648	379.893	337.626	375.559	318.328
E9PX09	Carnosine synthase 1 OS=Mus musculus GN=Carns1 PE=1 SV=1	347.831	302.266	436.362	491.575	328.797	441.507	375.525	460.293	206.023
E9PX24	LYR motif-containing protein 9 (Fragment) OS=Mus musculus GN=Lyrm9 PE=1 SV=1	374.109	371.933	369.452	376.015	367.35	365.793	394.409	372.642	386.198
E9PX29	Spectrin beta chain OS=Mus musculus GN=Sptbn4 PE=1 SV=1	355.202	385.577	353.648	397.74	350.571	379.484	407.585	381.322	387.634
E9PX30	Mitogen-activated protein kinase kinase kinase kinase OS=Mus musculus GN=Map4k5 PE=1 SV=1	328.875	373.574	361.253	385.663	365.386	362.88	401.507	415.725	410.477
E9PX52	Arf-GAP with SH3 domain, ANK repeat and PH domain-containing protein 2 OS=Mus musculus GN=Asap2 PE=1 SV=1	350.652	370.365	390.799	398.943	378.157	370.989	349.543	366.188	401.376
E9PX89	BolA-like protein 3 OS=Mus musculus GN=Bola3 PE=1 SV=1	482.207	260.481	287.732	375.122	519.809	291.588	499.358	291.678	354.298
E9PXE2	Guanine nucleotide exchange factor DBS OS=Mus musculus GN=Mcf2l PE=1 SV=1	465.85	376.73	382.762	327.182	431.36	343.918	355.981	322.554	294.444
E9PXF0	Protocadherin 17 OS=Mus musculus GN=Pcdh17 PE=1 SV=1	346.883	337.238	409.072	410.745	376.973	398.701	309.361	374.224	407.696
E9PXF8	SET-binding factor 2 OS=Mus musculus GN=Sbf2 PE=1 SV=1	372.58	380.094	376.081	374.731	355.337	376.303	408.918	367.471	366.807
E9PXP7	Stonin-2 OS=Mus musculus GN=Ston2 PE=1 SV=1	330.041	384.817	336.567	484.504	359.579	387.757	368.466	362.771	411.019
E9PXY8	Ubiquitin carboxyl-terminal hydrolase 7 OS=Mus musculus GN=Usp7 PE=1 SV=1	403.825	346.026	383.879	368.771	407.245	367.046	342.489	360.605	364.231
E9PY16	ArfGAP with dual PH domains 1 OS=Mus musculus GN=Adap1 PE=1 SV=1	369.45	378.87	366.059	350.803	406.504	391.489	375.686	403.172	317.394
E9PY39	Uncharacterized protein OS=Mus musculus GN=Gm20431 PE=3 SV=1	399.465	366.788	384.08	351.465	407.563	369.868	373.574	367.172	323.11
E9PY46	Intraflagellar transport 140 OS=Mus musculus GN=Ift140 PE=1 SV=1	407.937	378.177	388.946	379.002	390.008	340.3	337.044	407.986	311.049
E9PY58	Caseinolytic peptidase B protein homolog OS=Mus musculus GN=Clpb PE=1 SV=1	348.908	390.99	391.248	370.058	340.323	397.636	381.905	381.404	376.406
E9PY95	MAM domain-containing glycosylphosphatidylinositol anchor protein 1 OS=Mus musculus GN=Mdga1 PE=1 SV=1	361.867	400.588	360.602	401.204	410.956	350.66	353.743	376.469	356.307
E9PYD1	Family with sequence similarity 98, member C OS=Mus musculus GN=Fam98c PE=1 SV=1	362.525	380.272	332.506	398.918	332.853	358.994	466.852	364.634	422.201
E9PYF4	LIM domain only 7 OS=Mus musculus GN=Lmo7 PE=1 SV=1	350.497	360.395	398.395	405.111	351.514	387.009	358.598	369.252	401.791
E9PYG6	RAS p21 protein activator 1 OS=Mus musculus GN=Rasa1 PE=1 SV=1	345.426	372.098	380.208	360.456	390.991	400.698	392.938	398.493	333.043
E9PYH6	SET domain-containing 1A OS=Mus musculus GN=Setd1a PE=1 SV=1	461.708	352.69	458.679	328.693	399.507	375.995	215.191	436.092	229.14
E9PYI4	Maestro heat-like repeat family member 8 OS=Mus musculus GN=Mroh8 PE=1 SV=1	315.409	323.14	95.6146	423.44	573.909	517.975	335.325	369.45	499.534
E9PYK8	Rho guanine nucleotide exchange factor 4 OS=Mus musculus GN=Arhgef4 PE=1 SV=2	344.839	390.407	392.528	358.072	364.767	386.009	367.211	361.884	407.361
E9PYL2	Proline-rich protein 12 OS=Mus musculus GN=Prr12 PE=1 SV=1	234.407	317.617	303.883	575.254	296.136	333.977	494.198	450.847	542.212
E9PYT0	Rho GTPase-activating protein 5 OS=Mus musculus GN=Arhgap5 PE=1 SV=1	389.97	387.049	375.483	375.425	369.734	362.674	372.07	352.492	377.63
E9PYV1	Glucocorticoid receptor OS=Mus musculus GN=Nr3c1 PE=1 SV=1	365.385	346.812	354.723	386.937	392.771	370.557	372.962	370.596	424.044
E9PYW4	E3 ubiquitin-protein ligase RNF168 OS=Mus musculus GN=Rnf168 PE=1 SV=1	316.772	385	314.302	404.097	344.525	389.719	490.357	396.448	404.097
E9PYZ4	Tripartite motif-containing protein 34A OS=Mus musculus GN=Trim34a PE=1 SV=2	188.58	317.302	227.7	327.724	351.703	559.793	411.122	349.168	780.987
E9PZ11	Zinc finger protein 651 OS=Mus musculus GN=Zfp651 PE=1 SV=1	354.473	379.291	380.042	426.725	354.583	390.782	368.983	329.838	405.337
E9PZ16	Basement membrane-specific heparan sulfate proteoglycan core protein OS=Mus musculus GN=Hspg2 PE=1 SV=1	378.695	397.816	370.29	378.216	337.78	369.511	391.033	379.32	374.438
E9PZ43	Microtubule-associated protein OS=Mus musculus GN=Map4 PE=1 SV=3	370.784	372.635	388.865	393.538	360.291	390.328	341.41	362.796	386.577
E9PZ91	Bis(5'-adenosyl)-triphosphatase OS=Mus musculus GN=Fhit PE=1 SV=1	253.03	327.557	392.663	320.688	394.847	290.524	489.673	349.191	628
E9PZ97	Bloom syndrome protein homolog OS=Mus musculus GN=Blm PE=1 SV=1	341.496	477.511	273.282	393.626	240.769	334.181	557.37	378.808	475.485
E9PZD8	Ceruloplasmin OS=Mus musculus GN=Cp PE=1 SV=1	460.825	380.827	410.999	288.943	372.473	311.209	339.765	342.257	393.484
E9PZF0	Nucleoside diphosphate kinase OS=Mus musculus GN=Gm20390 PE=3 SV=1	367.992	397.781	389.87	330.134	378.573	435.409	328.91	382.794	329.254
E9PZJ8	Activating signal cointegrator 1 complex subunit 3 OS=Mus musculus GN=Ascc3 PE=1 SV=1	343.068	411.398	407.261	404.896	323.338	365.674	346.678	396.179	382.122
E9PZM4	Chromodomain-helicase-DNA-binding protein 2 OS=Mus musculus GN=Chd2 PE=1 SV=1	343.928	294.632	395.991	435.603	349.274	372.76	366.39	368.812	479.392
E9PZM7	SR-related CTD-associated factor 11 OS=Mus musculus GN=Scaf11 PE=1 SV=1	396.562	317.107	354.828	384.653	398.897	368.215	382.396	374.484	396.098
E9PZM8	Neuronal pentraxin receptor OS=Mus musculus GN=Nptxr PE=1 SV=2	317.488	337.081	392.379	382.271	406.022	486.815	323.719	358.26	368.644
E9PZP8	HECT and RLD domain-containing E3 ubiquitin protein ligase family member 1 OS=Mus musculus GN=Herc1 PE=1 SV=1	358.864	398.337	427.674	358.243	340.73	365.669	362.102	363.774	383.086
E9PZS8	Cytochrome c oxidase subunit 7A-related protein, mitochondrial OS=Mus musculus GN=Cox7a2l PE=1 SV=1	389.556	398.923	380.257	394.209	328.057	383.827	370.104	378.928	344.153
E9PZW8	Unconventional myosin-IXb OS=Mus musculus GN=Myo9b PE=1 SV=1	444.866	391.502	363.807	440.136	352.082	394.966	303.776	333.961	315.963
E9Q035	Uncharacterized protein OS=Mus musculus GN=Gm20425 PE=4 SV=1	450.754	374.671	379.151	341.539	356.577	317.507	400.608	355.191	362.548
E9Q046	T-complex protein 10c OS=Mus musculus GN=Tcp10c PE=4 SV=1	69.5323	368.506	261.476	381.269	237.428	424.593	716.682	512.119	666.973
E9Q0H6	Fatty acid-binding protein, brain OS=Mus musculus GN=Fabp7 PE=1 SV=1	476.26	307.644	472.956	357.327	381.698	349.605	336.505	323.36	281.131
E9Q0J2	Ral GTPase-activating protein subunit beta OS=Mus musculus GN=Ralgapb PE=1 SV=1	351.734	380.739	377.032	382.014	360.147	386.39	364.525	406.456	370.584
E9Q0J5	Kinesin-like protein KIF21A OS=Mus musculus GN=Kif21a PE=1 SV=2	360.573	375.121	391.668	393.739	355.474	396.793	370.545	370.682	360.214
E9Q0K9	ELMO domain-containing protein 1 OS=Mus musculus GN=Elmod1 PE=1 SV=1	356.681	354.674	395.749	384.182	325.042	408.888	390.034	392.092	377.375
E9Q0N0	Intersectin-1 OS=Mus musculus GN=Itsn1 PE=1 SV=1	380.726	361.479	382.566	377.87	381.552	365.828	373.553	368.533	373.404
E9Q0P8	Serine/threonine-protein kinase A-Raf OS=Mus musculus GN=Araf PE=1 SV=1	311.952	414.015	411.221	407.082	365.402	411.895	324.468	407.794	321.742
E9Q0S6	Tensin 1 OS=Mus musculus GN=Tns1 PE=1 SV=1	323.526	388.564	390.124	404.681	324.093	402.412	386.449	397.33	384.62
E9Q0V6	NHS-like protein 2 OS=Mus musculus GN=Nhsl2 PE=1 SV=1	317.707	318.693	302.222	417.252	369.677	384.323	395.46	379.914	560.991
E9Q0Y4	Signal-induced proliferation-associated protein 1 OS=Mus musculus GN=Sipa1 PE=1 SV=1	371.834	348.386	374.071	399.538	347.634	392.235	397.677	343.396	414.11
E9Q137	Testis-expressed gene 264 OS=Mus musculus GN=Tex264 PE=1 SV=1	356.683	367.205	443.501	340.736	428.112	410.976	291.563	373.47	306.986
E9Q1G8	Septin-7 OS=Mus musculus GN=Sept7 PE=1 SV=2	435.473	347.433	387.735	372.239	415.789	346.594	335.62	340.432	345.784
E9Q1K0	Sorting nexin-25 OS=Mus musculus GN=Snx25 PE=1 SV=1	372.635	387.685	396.032	370.407	371.445	360.835	380.479	375.306	347.484
E9Q1L7	DnaJ homolog subfamily C member 28 OS=Mus musculus GN=Dnajc28 PE=1 SV=1	348.38	367.832	411.325	306.899	452.918	333.863	390.23	314.025	424.019
E9Q1P8	Interferon regulatory factor 2-binding protein 2 OS=Mus musculus GN=Irf2bp2 PE=1 SV=1	318.332	364.325	378.853	430.053	363.291	396.71	351.367	374.037	427.975
E9Q1Q9	Ketohexokinase OS=Mus musculus GN=Khk PE=1 SV=1	364.562	419.438	432.93	399.963	299.82	362.561	329.801	353.887	400.517
E9Q1U2	Synaptopodin-2 OS=Mus musculus GN=Synpo2 PE=1 SV=1	362.542	347.076	396.358	395.007	313.686	365.607	356.322	399.85	451.408
E9Q1U6	CBP80/20-dependent translation initiation factor OS=Mus musculus GN=Ctif PE=1 SV=1	364.294	394.437	385.738	375.659	379.176	384.031	387.606	375.51	320.035
E9Q1V2	Copine-5 (Fragment) OS=Mus musculus GN=Cpne5 PE=1 SV=1	343.431	432.05	400.355	415.288	263.965	397.331	394.912	340.715	413.109
E9Q1W7	TBC domain-containing protein kinase-like protein OS=Mus musculus GN=Tbck PE=1 SV=1	363.464	390.929	401.141	357.955	407.795	369.455	357.283	369.82	331.834
E9Q247	SID1 transmembrane family member 1 OS=Mus musculus GN=Sidt1 PE=1 SV=1	346.455	354.96	377.143	358.7	408.388	377.869	436.021	352.588	372.061
E9Q271	WD repeat domain 17 OS=Mus musculus GN=Wdr17 PE=1 SV=2	324.535	345.947	353.396	412.422	357.646	379.567	396.358	414.696	434.591
E9Q284	Coilin OS=Mus musculus GN=Coil PE=1 SV=1	434.591	389.614	374.005	351.931	364.807	350.428	346.794	349.844	373.212
E9Q2E4	Uncharacterized protein OS=Mus musculus GN=Gm15800 PE=1 SV=2	383.748	368.903	402.623	358.248	366.292	391.356	352.814	369.745	355.784
E9Q2H1	E3 ubiquitin-protein ligase UBR5 OS=Mus musculus GN=Ubr5 PE=1 SV=1	450.295	364.111	347.401	319.059	379.276	320.926	359.062	373.271	423.461
E9Q2I3	Protein phosphatase 1M OS=Mus musculus GN=Ppm1m PE=4 SV=1	364.351	287.347	283.883	324.049	440.258	502.273	391.406	411.701	380.049
E9Q2S0	Protocadherin 7 OS=Mus musculus GN=Pcdh7 PE=1 SV=2	431.544	370.226	352.605	396.087	389.838	379.728	335.185	351.684	337.55
E9Q2S9	Coiled-coil domain-containing protein 43 OS=Mus musculus GN=Ccdc43 PE=1 SV=1	499.624	381.522	368.962	350.75	375.271	340.722	316.123	335.348	331.782
E9Q2V5	CDNA sequence BC037034 OS=Mus musculus GN=BC037034 PE=1 SV=1	285.546	349.843	392.965	426.486	391.776	406.61	352.99	375.075	429.006
E9Q2W8	BLOC-1-related complex subunit 5 OS=Mus musculus GN=Borcs5 PE=1 SV=1	311.657	374.339	405.563	396.646	354.743	397.001	377.768	401.102	376.059
E9Q2W9	Alpha-actinin-4 (Fragment) OS=Mus musculus GN=Actn4 PE=1 SV=1	346.373	387.612	378.965	360.437	353.429	398.121	387.088	399.094	369.303
E9Q317	Histone deacetylase complex subunit SAP18 OS=Mus musculus GN=Sap18b PE=1 SV=1	430.141	320.279	300.584	413.401	435.061	336.541	427.537	363.572	355.361
E9Q390	Myoferlin OS=Mus musculus GN=Myof PE=1 SV=2	361.141	377.241	417.522	340.525	344.918	339.649	383.757	400.47	399.844
E9Q3B5	Putative ubiquitin carboxyl-terminal hydrolase 50 OS=Mus musculus GN=Usp50 PE=3 SV=1	400.905	364.006	329.039	352.885	347.413	378.218	417.3	380.022	413.495
E9Q3F7	Retrotransposon-derived protein PEG10 OS=Mus musculus GN=Peg10 PE=1 SV=1	303.211	414.36	352.743	378.092	356.121	295.844	438.389	393.905	497.245
E9Q3G8	Nucleoporin 153 OS=Mus musculus GN=Nup153 PE=1 SV=1	349.984	341.446	432.107	387.051	351.677	357.62	373.225	356.473	426.604
E9Q3H6	Coenzyme Q10A OS=Mus musculus GN=Coq10a PE=1 SV=1	366.033	370.28	338.149	366.897	349.061	401.98	393.291	398.561	407.376
E9Q3J1	Probable E3 ubiquitin-protein ligase DTX3 OS=Mus musculus GN=Dtx3 PE=1 SV=1	350.585	392.827	323.964	421.308	358.867	399.901	379.68	436.675	340.463
E9Q3L2	Phosphatidylinositol 4-kinase alpha OS=Mus musculus GN=Pi4ka PE=1 SV=2	357.243	395.154	379.155	348.821	394.532	391.667	376.95	371.644	347.044
E9Q3M5	Anion exchange protein OS=Mus musculus GN=Slc4a5 PE=1 SV=1	420.586	425.851	357.487	483.779	246.763	317.771	372.314	401.033	372.581
E9Q3M9	RIKEN cDNA 2010300C02 gene OS=Mus musculus GN=2010300C02Rik PE=1 SV=1	327.525	366.907	399.499	398.835	341.295	422.219	334.684	392.331	402.474
E9Q3V9	Adhesion G protein-coupled receptor L1 OS=Mus musculus GN=Adgrl1 PE=1 SV=1	370.702	376.914	390.222	369.699	347.703	392.144	369.586	372.328	378.815
E9Q3X0	Major vault protein OS=Mus musculus GN=Mvp PE=1 SV=1	386.886	382.789	338.203	400.656	333.144	372.465	424.146	368.857	390.145
E9Q401	Ryanodine receptor 2 OS=Mus musculus GN=Ryr2 PE=1 SV=1	368.957	382.273	382.132	348.01	364.877	391.155	375.571	385.909	364.702
E9Q411	Neuroblastoma-amplified sequence OS=Mus musculus GN=Nbas PE=1 SV=1	302.023	365.225	354.082	426.706	335.048	341.735	498.047	412.439	417.781
E9Q446	E3 ubiquitin-protein ligase RNF25 OS=Mus musculus GN=Rnf25 PE=1 SV=1	339.265	356.99	366.345	390.186	377.276	406.689	391.95	389.885	374.866
E9Q447	Spectrin alpha chain, non-erythrocytic 1 OS=Mus musculus GN=Sptan1 PE=1 SV=1	398.226	368.014	380.817	365.02	398.6	367.667	362.681	358.095	349.43
E9Q448	Tropomyosin alpha-1 chain OS=Mus musculus GN=Tpm1 PE=1 SV=1	398.679	400.059	404.218	355.445	348.783	412.027	312.294	380.392	319.33
E9Q453	Tropomyosin alpha-1 chain OS=Mus musculus GN=Tpm1 PE=1 SV=1	393.605	405.641	403.86	353.431	344.831	409.512	322.097	373.752	328.852
E9Q456	Tropomyosin alpha-1 chain OS=Mus musculus GN=Tpm1 PE=1 SV=1	393.49	401.838	404.425	356.885	344.537	412.525	320.627	376.591	325.109
E9Q481	Serine/threonine-protein phosphatase 4 regulatory subunit 3A OS=Mus musculus GN=Ppp4r3a PE=1 SV=1	442.119	294.947	433.288	377.207	472.039	335.454	262.936	330.445	346.081
E9Q496	Vesicle transport protein USE1 OS=Mus musculus GN=Use1 PE=1 SV=1	431.992	291.146	362.01	298.78	478.623	330.005	404.096	330.994	404.85
E9Q4D5	GTP-binding protein REM 2 OS=Mus musculus GN=Rem2 PE=1 SV=1	332.428	366.487	363.814	411.339	367.998	422.498	374.802	366.713	393.057
E9Q4K0	Actin-binding LIM protein 2 OS=Mus musculus GN=Ablim2 PE=1 SV=1	365.686	368.283	350.032	410.656	350.864	395.244	394.291	372.371	389.217
E9Q4K7	Kinesin family member 13B OS=Mus musculus GN=Kif13b PE=1 SV=1	383.751	362.282	376.136	395.787	369.229	351.213	382.514	370.11	384.152
E9Q4M2	Hormone-sensitive lipase OS=Mus musculus GN=Lipe PE=1 SV=1	350.397	387.588	374.084	377.461	353.366	387.538	399.115	366.441	391.618
E9Q4M4	MICOS complex subunit OS=Mus musculus GN=Chchd6 PE=1 SV=1	321.703	343.217	402.702	367.277	366.482	408.491	355.825	379.014	440.65
E9Q4N7	AT-rich interactive domain 1B (SWI-like) OS=Mus musculus GN=Arid1b PE=1 SV=1	338.88	379.267	372.118	366.472	368.592	371.424	394.838	384.8	414.277
E9Q4P1	WD repeat and FYVE domain-containing protein 1 OS=Mus musculus GN=Wdfy1 PE=1 SV=1	444.268	353.173	399.255	327.524	420.71	356.296	323.038	363.662	316.514
E9Q4R1	Protein FAM102B OS=Mus musculus GN=Fam102b PE=1 SV=1	369.911	394.525	346.784	365.073	383.603	397.321	419.88	376.766	324.487
E9Q4S1	High affinity cAMP-specific and IBMX-insensitive 3',5'-cyclic phosphodiesterase 8B OS=Mus musculus GN=Pde8b PE=1 SV=1	397.933	378.339	368.857	375.078	403.295	372.989	363.12	342.143	350.514
E9Q4S7	Receptor-type tyrosine-protein phosphatase eta OS=Mus musculus GN=Ptprj PE=1 SV=2	353.167	422.013	336.739	355.033	375.493	408.706	413.186	365.056	355.389
E9Q4Z6	Double zinc ribbon and ankyrin repeat-containing protein 1 OS=Mus musculus GN=Dzank1 PE=1 SV=1	358.881	385.27	382.342	392.85	388.206	380.211	352.323	388.68	339.249
E9Q512	Thyroid hormone receptor interactor 11 OS=Mus musculus GN=Trip11 PE=1 SV=1	379.047	365.147	365.234	370.971	403.777	364.348	416.727	357.151	349.819
E9Q555	E3 ubiquitin-protein ligase RNF213 OS=Mus musculus GN=Rnf213 PE=1 SV=2	116.283	310.106	158.999	545.771	271.979	278.137	920.191	351.381	782.85
E9Q5B5	Hexokinase-2 OS=Mus musculus GN=Hk2 PE=1 SV=1	340.104	447.327	309.88	375.101	403.402	455.146	359.289	380.262	309.977
E9Q5C9	Nucleolar and coiled-body phosphoprotein 1 OS=Mus musculus GN=Nolc1 PE=2 SV=1	363.053	417.812	370.759	409.068	344.442	353.904	367.996	376.364	380.623
E9Q5D6	Ran-binding protein 9 OS=Mus musculus GN=Ranbp9 PE=1 SV=1	358.901	348.886	322.106	377.078	407.444	397.226	401.901	391.329	389.756
E9Q5D9	Insulin-like growth factor-binding protein 7 OS=Mus musculus GN=Igfbp7 PE=1 SV=1	384.161	450.978	287.647	362.474	487.677	344.128	319.118	346.64	369.979
E9Q5F9	Histone-lysine N-methyltransferase SETD2 OS=Mus musculus GN=Setd2 PE=1 SV=1	277.182	363.67	367.466	399.731	391.784	406.758	398.582	387.792	429.97
E9Q5J6	RIKEN cDNA A730017C20 gene OS=Mus musculus GN=A730017C20Rik PE=1 SV=1	276.323	409.838	438.006	394.683	311.781	413.035	327.98	442.956	379.442
E9Q5K9	YTH domain-containing protein 1 OS=Mus musculus GN=Ythdc1 PE=1 SV=2	226.183	349.27	481.702	475.372	275.548	396.204	361.507	448.69	427.594
E9Q5L4	RIKEN cDNA C530008M17 gene OS=Mus musculus GN=C530008M17Rik PE=1 SV=1	394.383	356.744	368.935	384.824	404.103	378.763	340.429	369.427	356.596
E9Q5M4	Zinc finger RNA-binding protein 2 OS=Mus musculus GN=Zfr2 PE=1 SV=1	305.277	317.54	395.891	438.206	353.116	387.831	370.555	382.352	469.531
E9Q612	Receptor-type tyrosine-protein phosphatase O OS=Mus musculus GN=Ptpro PE=1 SV=1	352.446	342.292	445.197	342.501	384.789	438.381	344.843	406.935	280.614
E9Q616	AHNAK nucleoprotein (desmoyokin) OS=Mus musculus GN=Ahnak PE=1 SV=1	370.203	409.022	444.67	350.501	336.963	421.409	289.089	360.334	345.478
E9Q634	Unconventional myosin-Ie OS=Mus musculus GN=Myo1e PE=1 SV=1	261.26	388.943	373.487	415.074	271.896	387.622	455.916	419.956	490.546
E9Q652	Regulator of G-protein-signaling 12 OS=Mus musculus GN=Rgs12 PE=1 SV=1	304.337	383.337	372.065	434.786	338.558	370.859	421.268	414.067	389.296
E9Q6B2	Coiled-coil domain-containing protein 85C OS=Mus musculus GN=Ccdc85c PE=1 SV=1	353.903	417.835	379.432	342.273	366.137	343.076	409.138	354.535	410.454
E9Q6E5	Serine/arginine-rich-splicing factor 11 OS=Mus musculus GN=Srsf11 PE=1 SV=1	363.344	383.581	379.643	368.914	357.235	381.39	385.941	381.624	373.663
E9Q6G4	ATP-binding cassette sub-family A member 7 OS=Mus musculus GN=Abca7 PE=1 SV=1	332.582	393.848	362.937	389.591	333.452	362.286	456.089	378.109	407.984
E9Q6H8	Pleckstrin homology domain-containing, family A member 5 OS=Mus musculus GN=Plekha5 PE=1 SV=1	367.669	376.264	383.646	358.052	366.707	365.875	392.958	386.979	373.068
E9Q6J5-3	Isoform New of Biorientation of chromosomes in cell division protein 1-like 1 OS=Mus musculus GN=Bod1l	321.646	389.397	309.611	409.706	409.775	319.566	432.763	402.7	434.213
E9Q6L9	Leucine-rich repeat-containing protein 7 OS=Mus musculus GN=Lrrc7 PE=1 SV=1	344.812	360.389	398.566	385.9	351.636	398.767	358.057	373.985	408.37
E9Q6P5	Tetratricopeptide repeat protein 7B OS=Mus musculus GN=Ttc7b PE=1 SV=1	349.34	391.206	393.906	365.773	358.198	409.12	375.524	381.01	346.174
E9Q6R7	Utrophin OS=Mus musculus GN=Utrn PE=1 SV=1	394.939	382.797	382.602	369.4	340.01	354.249	362.912	378.502	397.366
E9Q6T9	BTB/POZ domain-containing protein KCTD1 OS=Mus musculus GN=Kctd1 PE=1 SV=1	391.081	377.031	317.711	458.197	174.677	260.293	474.793	587.966	419.951
E9Q6U0	Voltage-dependent calcium channel beta subunit-associated regulatory protein OS=Mus musculus GN=Cbarp PE=4 SV=1	432.527	382.456	341.175	395.365	407.577	347.647	398.442	423.435	221.559
E9Q6Y8	Ubiquitin-specific peptidase 31 OS=Mus musculus GN=Usp31 PE=1 SV=1	306.009	289.228	438.031	427.294	386.049	377.481	382.593	333.653	463.596
E9Q6Y9	BTB/POZ domain-containing protein 10 OS=Mus musculus GN=Btbd10 PE=1 SV=1	290.409	406.417	353.472	388.502	340.58	442.837	365.426	420.696	406.066
E9Q720	Regulator of G-protein-signaling 20 OS=Mus musculus GN=Rgs20 PE=1 SV=1	361.099	402.842	362.842	396.129	390.644	377.231	380.273	382.18	322.389
E9Q777	A kinase (PRKA) anchor protein 11 OS=Mus musculus GN=Akap11 PE=1 SV=1	356.301	433.257	390.729	322.292	419.081	314.647	392.465	329.848	396.024
E9Q784	Zinc finger CCCH domain-containing protein 13 OS=Mus musculus GN=Zc3h13 PE=1 SV=1	304.336	379.285	364.522	381.819	337.878	373.731	426.422	417.466	438.303
E9Q7E2	AT-rich interactive domain 2 (ARID, RFX-like) OS=Mus musculus GN=Arid2 PE=1 SV=1	358.978	187.314	316.495	685.022	452.597	325.643	302.216	297.746	539.402
E9Q7E9	Phosphofurin acidic cluster sorting protein 2 OS=Mus musculus GN=Pacs2 PE=1 SV=1	416.521	401.025	372.928	346.352	397.912	367.553	328.705	393.728	302.47
E9Q7F2	E3 ubiquitin-protein ligase RNF169 OS=Mus musculus GN=Rnf169 PE=1 SV=1	329.297	311.478	334.813	440.652	508.795	362.149	323.511	315.25	469.095
E9Q7G0	Nuclear mitotic apparatus protein 1 OS=Mus musculus GN=Numa1 PE=1 SV=1	391.82	354.824	355.845	400.233	367.034	365.207	354.896	368.17	418.218
E9Q7L0	Oxoglutarate dehydrogenase-like OS=Mus musculus GN=Ogdhl PE=1 SV=1	401.393	402.577	364.899	361.012	352.148	373.622	369.473	376.499	355.43
E9Q7M2	TSC22 domain family, member 2 OS=Mus musculus GN=Tsc22d2 PE=1 SV=1	415.729	362.046	395.369	339.742	422.36	347.1	309.51	366.114	362.039
E9Q7P2	Voltage-dependent T-type calcium channel subunit alpha OS=Mus musculus GN=Cacna1i PE=1 SV=1	356.894	352.135	371.234	397.034	410.892	382.119	353.78	377.663	373.015
E9Q7T7	Chondroadherin-like protein OS=Mus musculus GN=Chadl PE=1 SV=1	325.872	365.69	372.511	407.978	325.556	420.231	402.834	368.187	424.212
E9Q7X7	Neurexin II OS=Mus musculus GN=Nrxn2 PE=1 SV=1	347.737	396.064	360.759	356.848	368.647	385.745	417.104	386.305	367.812
E9Q800	MICOS complex subunit MIC60 OS=Mus musculus GN=Immt PE=1 SV=1	407.252	362.717	376.523	374.288	376.682	356.623	356.807	353.345	390.006
E9Q827	cAMP-regulated phosphoprotein 19 OS=Mus musculus GN=Arpp19 PE=1 SV=1	386.654	323.909	362.669	353.215	451.203	400.757	337.824	344.786	386.757
E9Q828	Calcium-transporting ATPase OS=Mus musculus GN=Atp2b4 PE=1 SV=1	402.742	352.737	378.334	356.035	412.56	385.054	343.5	374.589	333.899
E9Q835	Calcium-dependent secretion activator 2 OS=Mus musculus GN=Cadps2 PE=1 SV=1	407.672	394.863	357.02	348	428.362	353.163	386.326	366.622	300.405
E9Q8A3	Phosphatidylinositol 4-kinase beta OS=Mus musculus GN=Pi4kb PE=1 SV=1	339.96	422.748	398.464	413.538	313.47	395.852	341.14	371.728	387.475
E9Q8G4	Transcription factor 4 OS=Mus musculus GN=Tcf4 PE=1 SV=1	421.275	241.701	313.307	401.194	473.702	325.425	347.54	301.275	553.052
E9Q8I0	Complement factor H OS=Mus musculus GN=Cfh PE=1 SV=1	497.577	392.369	391.853	353.384	348.166	320.357	312.248	367.57	314.304
E9Q8I7	Nuclear transcription factor, X-box-binding-like 1 OS=Mus musculus GN=Nfxl1 PE=1 SV=1	382.042	293.49	455.521	408.745	393.643	372.188	259.802	312.404	460.022
E9Q8I9-2	Isoform 2 of Protein furry homolog OS=Mus musculus GN=Fry	376.716	347.318	391.734	349.671	363.062	350.12	414.644	370.396	409.921
E9Q8N8	Anion exchange protein OS=Mus musculus GN=Slc4a4 PE=1 SV=1	396.208	403.089	375.221	385.112	377.798	361.473	348.841	371.695	332.898
E9Q8P8	Protein FAM131B OS=Mus musculus GN=Fam131b PE=1 SV=1	381.539	399.768	372.979	375.944	403.719	349.929	374.902	361.704	338.291
E9Q8Q6	Coiled-coil domain-containing 141 OS=Mus musculus GN=Ccdc141 PE=1 SV=2	238.115	396.436	349.869	360.127	295.737	414.451	446.337	456.31	505.776
E9Q8S5	Microtubule-associated serine/threonine-protein kinase 3 OS=Mus musculus GN=Mast3 PE=1 SV=2	330.244	376.227	362.168	393.778	337.893	368.711	428.984	412.664	404.305
E9Q8T1	Transforming acidic coiled-coil-containing protein 2 OS=Mus musculus GN=Tacc2 PE=1 SV=1	402.566	376.748	369.3	370.966	357.623	392.424	348.967	359.625	377.246
E9Q8V6	DENN/MADD domain-containing 4A OS=Mus musculus GN=Dennd4a PE=1 SV=1	397.707	388.43	427.136	363.513	352.071	374.215	295.684	346.587	384.241
E9Q912	RAP1, GTP-GDP dissociation stimulator 1 OS=Mus musculus GN=Rap1gds1 PE=1 SV=1	397.516	393.889	375.13	333.611	401.857	389.116	345.789	378.598	319.214
E9Q967	Segment polarity protein dishevelled homolog DVL-3 OS=Mus musculus GN=Dvl3 PE=1 SV=1	286.36	402.291	378.281	362.647	342.687	394.555	415.093	417.788	415.606
E9Q969	Cytoplasmic polyadenylation element-binding protein 2 OS=Mus musculus GN=Cpeb2 PE=1 SV=2	415.837	388.835	379.126	339.753	381.146	372.457	337.673	386.199	330.262
E9Q9B0	Kinesin-like protein KIF1C OS=Mus musculus GN=Kif1c PE=1 SV=1	372.162	337.85	373.308	387.48	378.814	355.024	390.499	360.262	428.487
E9Q9B3	SPRY domain-containing 3 OS=Mus musculus GN=Spryd3 PE=1 SV=1	121.098	383.373	271.913	392.322	258.305	375.253	739.118	443.68	629.321
E9Q9B7	Kinase D-interacting substrate 220 OS=Mus musculus GN=Kidins220 PE=1 SV=1	348.53	397.583	374.21	363.053	339.755	435.596	357.702	400.432	357.887
E9Q9C1	Actin-binding LIM protein 1 OS=Mus musculus GN=Ablim1 PE=1 SV=1	355.505	367.395	361.361	393.347	368.922	368.892	387.052	367.992	422.375
E9Q9C3	Afadin OS=Mus musculus GN=Afdn PE=1 SV=1	387.364	383.48	388.616	368.717	381.32	394.147	326.611	372.549	341.84
E9Q9C7	Actin-binding LIM protein 1 OS=Mus musculus GN=Ablim1 PE=1 SV=1	356.79	367.422	362.021	391.41	369.252	368.877	386.099	368	421.521
E9Q9D5-1	Isoform 1 of Rab-like protein 2A OS=Mus musculus GN=Rabl2	372.289	361.281	367.007	466.013	391.56	374.816	358.297	399.221	292.907
E9Q9F1	Potassium voltage-gated channel subfamily KQT member 5 OS=Mus musculus GN=Kcnq5 PE=1 SV=1	346.39	378.012	442.287	326.248	352.447	404.72	363.363	438.755	293.954
E9Q9G8	Intraflagellar transport protein 122 homolog OS=Mus musculus GN=Ift122 PE=1 SV=2	353.285	392.93	384.603	376.65	357.13	450.144	351.55	412.271	285.283
E9Q9H0	Disks large homolog 1 OS=Mus musculus GN=Dlg1 PE=1 SV=1	354.692	377.539	386.417	378.49	358.418	375.42	389.903	385.499	374.2
E9Q9J4	Inositol hexakisphosphate and diphosphoinositol-pentakisphosphate kinase 2 OS=Mus musculus GN=Ppip5k2 PE=1 SV=1	311.533	338.198	374.973	426.814	350.77	365.055	392.119	386.247	479.928
E9Q9K8	A kinase (PRKA) anchor protein 6 OS=Mus musculus GN=Akap6 PE=1 SV=1	322.048	268.94	372.505	455.128	363.22	354.835	355.683	332.81	608.975
E9Q9M1	Cytosolic purine 5'-nucleotidase OS=Mus musculus GN=Nt5c2 PE=1 SV=1	366.327	396.463	351.394	366.779	354.856	358.324	420.616	392.881	381.834
E9Q9R9	Discs, large homolog 5 (Drosophila) OS=Mus musculus GN=Dlg5 PE=1 SV=1	225.112	372.071	304.611	506.429	333.534	359.892	504.102	430.62	485.704
E9Q9S3	U3 small nucleolar RNA-associated protein 14 homolog B OS=Mus musculus GN=Utp14b PE=1 SV=1	318.03	368.677	336.805	515.749	363.378	367.398	340.326	424.627	399.337
E9Q9T1	Leucine-rich repeat flightless-interacting protein 1 OS=Mus musculus GN=Lrrfip1 PE=1 SV=2	371.655	380.686	371.051	369.419	409.91	372.642	349.01	371.866	362.467
E9QA15	Caldesmon 1 OS=Mus musculus GN=Cald1 PE=1 SV=1	374.391	322.341	394.794	429.717	360.417	376.507	329.848	346.376	444.452
E9QA61	Centrosomal protein 85-like OS=Mus musculus GN=Cep85l PE=1 SV=2	267.584	254.449	397.468	447.279	427.07	435.845	292.811	350.964	545.645
E9QAB6	Protein prenyltransferase alpha subunit repeat-containing 1 OS=Mus musculus GN=Ptar1 PE=1 SV=1	442.81	353.556	342.921	374.543	418.725	330.018	300.586	452.767	315.007
E9QAD8	IQ motif and SEC7 domain-containing protein 2 OS=Mus musculus GN=Iqsec2 PE=1 SV=1	324.766	370.617	372.619	398.279	345.802	412.082	376.865	395.984	405.297
E9QAE3	B-TFIID TATA-box-binding protein-associated factor 1 OS=Mus musculus GN=Btaf1 PE=1 SV=1	408.337	387.212	328.69	388.108	367.727	361.618	437.89	359.155	343.365
E9QAP6	DNA polymerase epsilon catalytic subunit A OS=Mus musculus GN=Pole PE=1 SV=1	563.899	369.635	408.976	262.442	428.097	251	286.39	358.378	302.803
E9QAQ5	Glycogen synthase kinase-3 beta OS=Mus musculus GN=Gsk3b PE=1 SV=1	375.377	375.272	417.384	363.216	362.641	383.51	349.496	358.795	364.125
E9QAQ7	AT-rich interactive domain-containing protein 1A OS=Mus musculus GN=Arid1a PE=1 SV=1	404.501	353.079	369.877	363.645	373.447	346.202	367.2	354.927	428.637
E9QAS5	Chromodomain-helicase-DNA-binding protein 4 OS=Mus musculus GN=Chd4 PE=1 SV=1	391.592	362.093	373.813	383.459	374.29	364.827	335.506	383.945	390.739
E9QAS7	Inositol polyphosphate-5-phosphatase A OS=Mus musculus GN=Inpp5a PE=1 SV=1	423.592	386.822	328.159	340.955	475.432	298.855	398.508	336.674	354.758
E9QAT0	Synaptic functional regulator FMR1 OS=Mus musculus GN=Fmr1 PE=1 SV=1	359.811	264.027	405.165	453.558	379.878	349.304	365.875	355.754	465.87
E9QAU4	Enhancer trap locus 4 OS=Mus musculus GN=Etl4 PE=1 SV=1	349.366	345.113	399.593	387.487	379.059	395.256	354.003	367.01	397.265
E9QAZ2	Ribosomal protein L15 OS=Mus musculus GN=Gm10020 PE=3 SV=1	358.957	381.164	417.702	351.913	389.502	395.406	330.682	376.272	342.255
E9QB01	Neural cell adhesion molecule 1 OS=Mus musculus GN=Ncam1 PE=1 SV=2	405.501	352.075	376.714	380.665	380.983	373.796	374.364	363.004	349.528
E9QB02	Methionine--tRNA ligase, cytoplasmic OS=Mus musculus GN=Mars PE=1 SV=1	370.951	387.557	374.506	379.355	351.176	366.175	375.629	375.463	395.934
E9QJS7	Adhesion G protein-coupled receptor E5 OS=Mus musculus GN=Adgre5 PE=1 SV=1	369.423	368.677	424.821	390.964	287.318	404.354	392.753	347.422	392.311
E9QJT5	Acylphosphatase OS=Mus musculus GN=Acyp1 PE=1 SV=1	361.987	364.772	345.081	363.051	404.709	371.084	459.802	346.034	376.236
E9QJT6	Non-canonical poly(A) RNA polymerase PAPD5 OS=Mus musculus GN=Papd5 PE=1 SV=1	402.183	358.608	369.899	331.025	276.069	404.404	390.039	438.034	401.727
E9QJU8	Transformation-related protein 53-binding protein 2 OS=Mus musculus GN=Trp53bp2 PE=1 SV=1	382.464	410.126	341.501	393.761	377.515	376.575	365.827	326.859	400.849
E9QJV4	Pre-mRNA-processing factor 39 OS=Mus musculus GN=Prpf39 PE=1 SV=1	286.732	417.001	328.608	390.132	311.11	423.511	412.605	494.269	372.389
E9QJY0	Cationic amino acid transporter 2 OS=Mus musculus GN=Slc7a2 PE=1 SV=1	345.605	385.135	344.764	268.345	476.15	448.939	349.242	379.83	340.835
E9QK04	Neogenin OS=Mus musculus GN=Neo1 PE=1 SV=1	371.935	365.456	386.903	383.206	365.21	372.38	359.851	383.45	380.855
E9QK36	WD repeat-containing protein 62 OS=Mus musculus GN=Wdr62 PE=1 SV=1	121.037	393.158	216.11	501.086	280.244	415.6	779.563	470.243	468.863
E9QK48	Echinoderm microtubule-associated protein-like 2 OS=Mus musculus GN=Eml2 PE=1 SV=1	396.376	327.522	385.736	411.31	372.429	381.974	389.041	376.936	328.209
E9QK53	Fibroblast growth factor receptor OS=Mus musculus GN=Fgfr2 PE=1 SV=1	383.164	346.148	387.631	368.778	429.771	334.042	393.547	380.86	333.46
E9QK62	Ephexin-1 OS=Mus musculus GN=Ngef PE=1 SV=1	378.279	373.771	367.157	375.38	352.867	355.283	393.852	392.677	390.692
E9QK82	Myelin protein P0 OS=Mus musculus GN=Mpz PE=1 SV=1	364.719	307.459	666.753	270.322	289.404	243.98	265.381	300.984	573.219
E9QK83	Small subunit processome component 20 homolog OS=Mus musculus GN=Utp20 PE=1 SV=1	343.623	391.944	342.508	413.723	348.53	349.871	406.693	373.187	444.943
E9QKB2	Intracellular hyaluronan-binding protein 4 OS=Mus musculus GN=Habp4 PE=1 SV=1	350.114	310.668	394.528	429.399	394.03	406.868	357.286	321.244	422.232
E9QKC0	Glutamate receptor 2 OS=Mus musculus GN=Gria2 PE=1 SV=1	381.831	374.383	378.676	336.468	413.293	382.004	374.725	369.829	336.405
E9QKC6	Tripartite motif-containing protein 2 OS=Mus musculus GN=Trim2 PE=1 SV=1	361.472	333.567	383.395	390.503	386.829	379.834	379.728	354.097	411.246
E9QKD1	Nucleolar protein 8 OS=Mus musculus GN=Nol8 PE=1 SV=1	354.954	386.661	349.884	382.154	319.963	401.302	452.847	349.514	412.743
E9QKE4	Rab3 GTPase-activating protein non-catalytic subunit OS=Mus musculus GN=Rab3gap2 PE=1 SV=1	377.834	387.854	391.686	344.057	369.001	367.004	361.248	394.668	359.91
E9QKI2	Potassium voltage-gated channel subfamily C member 3 OS=Mus musculus GN=Kcnc3 PE=1 SV=1	353.142	424.518	334.316	390.164	379.243	357.36	410.477	368.463	378.227
E9QKI4	Proline-rich AKT1 substrate 1 OS=Mus musculus GN=Akt1s1 PE=1 SV=1	327.379	388.363	392.937	422.457	386.103	452.293	275.231	358.939	364.082
E9QKK4	Glucocorticoid-induced transcript 1 protein OS=Mus musculus GN=Glcci1 PE=1 SV=1	342.457	375.455	339.35	392.201	348.477	380.318	420.671	377.862	437.268
E9QKR0	Guanine nucleotide-binding protein G(I)/G(S)/G(T) subunit beta-2 OS=Mus musculus GN=Gnb2 PE=1 SV=1	411.587	349.029	325.32	387.967	405.348	364.207	407.345	373.923	349.317
E9QL65	Conserved oligomeric Golgi complex subunit 3 OS=Mus musculus GN=Cog3 PE=1 SV=1	399.446	389.67	368.116	372.22	348.923	299.319	409.113	382.847	405.96
E9QL80	Acyl-CoA:lysophosphatidylglycerol acyltransferase 1 OS=Mus musculus GN=Lpgat1 PE=1 SV=1	313.981	442.017	394.916	367.759	333.865	406.162	357.508	382.884	384.419
E9QLA5	Inverted formin-2 OS=Mus musculus GN=Inf2 PE=1 SV=1	350.388	373.718	373.545	367.523	365.487	389.861	388.45	372.554	402.101
E9QLB8	Atypical kinase COQ8B, mitochondrial OS=Mus musculus GN=Coq8b PE=1 SV=1	357.654	376.697	388.755	325.646	373.336	413.278	352.522	414.295	352.708
E9QLH4	E3 ubiquitin-protein ligase TRIM9 OS=Mus musculus GN=Trim9 PE=1 SV=1	351.692	346.751	421.149	358.925	367.973	396.185	334.866	368.477	413.612
E9QLH9	PEAK1-related kinase-activating pseudokinase 1 OS=Mus musculus GN=Prag1 PE=1 SV=1	303.675	269.571	378.118	407.225	368.941	379.386	433.646	369.771	526.956
E9QLL2	Dynamin-3 OS=Mus musculus GN=Dnm3 PE=1 SV=1	410.531	380.522	369.318	366.653	378.385	370.394	361.637	376.028	334.854
E9QLP0	Tubulin polyglutamylase complex subunit 2 OS=Mus musculus GN=Tpgs2 PE=1 SV=1	336.024	326.47	434.048	406.681	304.728	370.316	379.969	372.359	468.038
E9QLU2	Selection and upkeep of intraepithelial T-cells protein 4 OS=Mus musculus GN=Skint4 PE=4 SV=1	687.036	385.499	422.115	229.451	552.371	272.174	143.631	270.772	144.166
E9QLZ1	TSC22 domain family protein 1 OS=Mus musculus GN=Tsc22d1 PE=1 SV=1	332.079	404.243	463.335	353.749	343.694	442.603	290.328	368.518	338.475
E9QLZ9	Protein enabled homolog OS=Mus musculus GN=Enah PE=1 SV=1	370.824	348.672	413.704	372.454	408.592	417.014	315.389	361.785	331.323
E9QM16	Leucine-rich repeat-containing protein 49 OS=Mus musculus GN=Lrrc49 PE=1 SV=1	337.889	376.754	377.352	371.306	380.447	355.479	422.959	389.789	380.838
E9QM38	Solute carrier family 12 member 2 OS=Mus musculus GN=Slc12a2 PE=1 SV=1	369.071	385.719	379.102	393.214	361.443	371.815	379.545	370.531	365.652
E9QM73	Serine/threonine-protein kinase WNK2 OS=Mus musculus GN=Wnk2 PE=1 SV=1	352.834	345.146	403.523	389.53	345.734	379.678	377.004	363.908	427.093
E9QM75	TNFAIP3-interacting protein 1 OS=Mus musculus GN=Tnip1 PE=1 SV=1	395.084	396.866	370.638	342.968	353.49	356.721	399.379	367.699	379.339
E9QM77	Ataxin-2 OS=Mus musculus GN=Atxn2 PE=1 SV=1	371.595	343.666	360.752	379.728	411.574	388.106	375.423	356.917	385.075
E9QM90	RIKEN cDNA 2310035C23 gene OS=Mus musculus GN=2310035C23Rik PE=1 SV=2	376.725	361.892	419.468	342.111	401.058	413.216	307.93	378.719	326.493
E9QM99	Dedicator of cytokinesis protein 10 OS=Mus musculus GN=Dock10 PE=1 SV=1	346.987	383.331	362.336	382.246	365.103	372.882	415.391	371.843	396.078
E9QMC1	Cingulin OS=Mus musculus GN=Cgn PE=1 SV=1	368.98	296.96	378.247	362.88	495.897	378.627	254.297	373.041	427.584
E9QMD2	Ubiquitin-conjugating enzyme E2Q-like protein 1 OS=Mus musculus GN=Ube2ql1 PE=3 SV=1	398.473	195.501	453.041	477.631	417.107	356.215	314.362	358.016	389.438
E9QMF5	Neuron navigator 3 OS=Mus musculus GN=Nav3 PE=1 SV=1	306.656	262.867	355.115	442.117	431.35	371.545	377.537	362.301	520.742
E9QMI7	Arf-GAP with SH3 domain, ANK repeat and PH domain-containing protein 1 OS=Mus musculus GN=Asap1 PE=1 SV=2	346.772	352.338	410.35	386.865	365.141	386.336	349.233	375.991	400.367
E9QMK2	Versican core protein OS=Mus musculus GN=Vcan PE=1 SV=1	377.984	323.963	361.197	412.386	417.849	380.78	364.414	354.806	382.85
E9QMK9	RIKEN cDNA 9030617O03 gene OS=Mus musculus GN=9030617O03Rik PE=1 SV=1	277.279	328.41	334.756	399.303	348.817	392.263	527.22	374.611	488.836
E9QML5	Zinc finger protein 638 OS=Mus musculus GN=Zfp638 PE=1 SV=2	389.858	366.129	381.324	369.841	396.286	373.886	323.066	375.982	371.168
E9QMN5	Transcriptional repressor p66 alpha OS=Mus musculus GN=Gatad2a PE=1 SV=1	352.433	383.594	374.437	433.398	412.885	346.615	386.668	394.105	299.477
E9QMN8	Solute carrier family 15 member 2 OS=Mus musculus GN=Slc15a2 PE=1 SV=1	440.179	304.218	495.226	286.205	337.628	263.965	349.832	354.22	475.344
E9QMP6	Non-specific serine/threonine protein kinase OS=Mus musculus GN=Mark2 PE=1 SV=2	377.633	371.097	384.017	359.777	374.256	385.732	381.096	363.182	365.714
E9QMU3	Ensconsin OS=Mus musculus GN=Map7 PE=1 SV=3	326.872	299.929	428.794	386.459	361.685	394.812	353.63	347.761	487.553
E9QMV2	Costars family protein ABRACL OS=Mus musculus GN=Abracl PE=1 SV=1	418.269	351.695	325.846	381.545	458.608	385.128	335.195	402.901	283.068
E9QMX4	Ribosomal protein S6 kinase delta-1 OS=Mus musculus GN=Rps6kc1 PE=1 SV=1	355.103	354.071	368.558	371.822	373.551	408.855	408.086	375.095	370.253
E9QN12	Platelet-derived growth factor receptor beta OS=Mus musculus GN=Pdgfrb PE=1 SV=1	308.229	365.397	380.823	355.964	300.372	407.095	430.787	418.006	452.645
E9QN14	SLIT-ROBO Rho GTPase-activating protein 3 OS=Mus musculus GN=Srgap3 PE=1 SV=1	383.037	370.761	383.9	360.023	420.617	354.769	346.096	370.433	357.607
E9QN31	Probable 28S rRNA (cytosine-C(5))-methyltransferase OS=Mus musculus GN=Nop2 PE=1 SV=1	245.831	409.393	282.675	489.279	318.816	349.823	548.434	436.043	440.556
E9QN47	MAP kinase-activating death domain protein OS=Mus musculus GN=Madd PE=1 SV=2	401.389	387.995	406.491	345.759	380.336	381.884	343.897	355.597	327.381
E9QN59	Mitogen-activated protein kinase OS=Mus musculus GN=Mapk10 PE=1 SV=1	333.807	415.021	375.571	338.43	357.19	418.768	385.654	394.049	357.937
E9QN63	Arf-GAP with SH3 domain, ANK repeat and PH domain-containing protein 1 OS=Mus musculus GN=Asap1 PE=1 SV=2	342.475	363.157	408.552	383.177	358.81	385.302	355.324	382.745	396.402
E9QN70	Laminin subunit beta-1 OS=Mus musculus GN=Lamb1 PE=1 SV=1	419.284	391.85	366.129	340.316	371.464	392.6	330.426	363.265	358.949
E9QN77	Transmembrane and ubiquitin-like domain-containing protein 1 OS=Mus musculus GN=Tmub1 PE=1 SV=1	265.624	359.746	372.166	445.102	321.474	386.897	490.758	366.621	459.785
E9QN92	Metalloreductase STEAP3 OS=Mus musculus GN=Steap3 PE=1 SV=1	311.3	365.545	393.362	444.455	318.971	326.648	464.672	384.877	428.98
E9QN99	Protein ABHD14B OS=Mus musculus GN=Abhd14b PE=1 SV=1	353.2	361.936	371.009	414.34	322.023	365.334	427.388	369.975	426.688
E9QNE9	Mitogen-activated protein kinase kinase kinase kinase OS=Mus musculus GN=Map4k3 PE=1 SV=1	369.643	394.243	440.932	382.159	342.079	372.442	318.353	364.325	361.369
E9QNF7	Contactin-associated protein-like 2 OS=Mus musculus GN=Cntnap2 PE=1 SV=1	388.972	370.4	379.812	368.409	386.025	365.798	359.741	383.407	352.951
E9QNG6	Sorting nexin-13 OS=Mus musculus GN=Snx13 PE=1 SV=2	338.582	428.246	389.046	387.308	310.321	414.492	375.97	376.064	366.231
E9QNH7	Acyl-CoA-binding domain-containing protein 5 OS=Mus musculus GN=Acbd5 PE=1 SV=1	217.596	356.641	258.88	406.77	334.454	419.501	566.147	461.894	507.019
E9QNL4	Inhibitor of nuclear factor kappa-B kinase subunit alpha OS=Mus musculus GN=Chuk PE=1 SV=1	322.919	358.712	416.371	393.639	345.22	386.533	376.45	376.383	415.597
E9QNN1	ATP-dependent RNA helicase A OS=Mus musculus GN=Dhx9 PE=1 SV=1	393.827	393.665	355.237	348.259	393.256	363.637	373.986	380.654	353.083
E9QNQ2	Serine/threonine-protein phosphatase 6 regulatory ankyrin repeat subunit B OS=Mus musculus GN=Ankrd44 PE=1 SV=1	354.421	403.742	376.815	361.597	402.967	402.85	355.331	373.195	327.926
E9QNR6	Expressed sequence AI837181 OS=Mus musculus GN=AI837181 PE=1 SV=1	388.635	391.347	360.984	416.685	369.678	353.646	403.867	378.642	315.341
E9QNV2	Mediator of RNA polymerase II transcription subunit 23 OS=Mus musculus GN=Med23 PE=1 SV=1	332.718	373.42	420.807	336.121	330.315	316.01	473.519	382.857	431.764
E9QNY8	Sacsin OS=Mus musculus GN=Sacs PE=1 SV=1	391.569	385.665	362.526	336.072	421.719	364.733	390.041	361.174	335.765
E9QNZ2	E3 ubiquitin-protein ligase DZIP3 OS=Mus musculus GN=Dzip3 PE=1 SV=1	399.995	378.915	361.644	371.282	350.257	406.627	339.984	399.283	348.323
E9QP00	Transformer-2 protein homolog alpha OS=Mus musculus GN=Tra2a PE=1 SV=1	445.085	334.934	384.621	327.286	411.115	350.074	335.831	372.651	355.585
E9QP44	Arf-GAP with Rho-GAP domain, ANK repeat and PH domain-containing protein 2 OS=Mus musculus GN=Arap2 PE=1 SV=1	264.925	393.988	316.297	395.199	296.765	470.379	440.934	460.102	421.98
E9QP54	Jouberin OS=Mus musculus GN=Ahi1 PE=1 SV=1	388.163	333.37	460.719	408.691	367.277	382.067	258.943	375.755	352.624
E9QP56	Apolipoprotein C-III OS=Mus musculus GN=Apoc3 PE=1 SV=1	636.542	306.826	299.87	278.083	441.015	224.794	448.408	285.284	353.999
E9QP62	LIM and senescent cell antigen-like-containing domain protein OS=Mus musculus GN=Lims1 PE=1 SV=1	377.998	305.145	454.685	318.264	375.499	336.575	393.907	327.556	459.149
E9QP73	Transmembrane protein 132C OS=Mus musculus GN=Tmem132c PE=4 SV=1	346.394	367.606	350.453	345.013	399.782	437.26	366.693	373.1	388.586
E9QP87	Membrane protein MLC1 OS=Mus musculus GN=Mlc1 PE=1 SV=1	429.728	243.452	438.038	439.997	406.933	329.291	284.014	298.527	469.732
E9QP94	Coiled-coil domain-containing protein 136 OS=Mus musculus GN=Ccdc136 PE=1 SV=1	380.506	366.52	370.35	392.386	403.723	345.013	363.381	382.239	362.791
E9QP99	Golgin subfamily A member 3 OS=Mus musculus GN=Golga3 PE=1 SV=1	370.509	339.861	365.846	390.602	371.687	382.969	386.826	358.634	418.83
E9QPD7	Pyruvate carboxylase OS=Mus musculus GN=Pcx PE=1 SV=1	390.355	349.803	370.62	389.331	371.686	338.878	397.997	356.819	413.122
E9QPE7	Myosin-11 OS=Mus musculus GN=Myh11 PE=1 SV=1	433.366	379.274	382.213	342.043	410.972	381.072	304.805	360.726	317.216
E9QPI5	Sister chromatid cohesion protein PDS5 homolog A OS=Mus musculus GN=Pds5a PE=1 SV=1	386.322	427.533	362.092	327.093	385.09	374.877	323.244	418.187	335.058
E9QPQ8	39S ribosomal protein L48, mitochondrial OS=Mus musculus GN=Mrpl48 PE=1 SV=1	368.141	326.117	451.13	307.335	363.635	320.247	475.034	346.536	406.111
E9QPR7	Down syndrome cell adhesion molecule-like protein 1 homolog OS=Mus musculus GN=Dscaml1 PE=1 SV=1	309.94	329.742	424.689	369.891	394.916	339.979	405.983	371.629	447.186
E9QPU1	von Willebrand factor OS=Mus musculus GN=Vwf PE=1 SV=2	394.194	336.207	386.196	378.741	378.647	381.456	322.887	360.923	415.056
E9QPX1	Collagen alpha-1(XVIII) chain OS=Mus musculus GN=Col18a1 PE=1 SV=1	372.19	442.491	390.307	382.335	266.006	351.611	413.679	378.263	391.588
E9QPX3	NADH dehydrogenase [ubiquinone] iron-sulfur protein 4, mitochondrial OS=Mus musculus GN=Ndufs4 PE=1 SV=1	401.957	346.203	376.909	369.445	435.545	407.376	314.984	377.541	301.548
E9QQ25	Striated muscle-specific serine/threonine-protein kinase OS=Mus musculus GN=Speg PE=1 SV=1	498.857	372.587	377.76	353.151	359.565	316.473	249.15	416.273	349.168
E9QQ29	Dermokine OS=Mus musculus GN=Dmkn PE=1 SV=1	406.468	377.449	304.975	350.732	443.401	331.796	443.487	344.818	371.079
F2Z3U3	Ras association (RalGDS/AF-6) and pleckstrin homology domains 1 OS=Mus musculus GN=Raph1 PE=1 SV=2	370.549	377.108	402.678	379.142	340.629	414.533	347.492	361.511	367.945
F2Z3U4	Matrilin-4 OS=Mus musculus GN=Matn4 PE=1 SV=1	384.89	350.055	393.574	355.9	359.752	395.293	371.958	360.8	387.213
F6Q8A4	Ribosomal protein S6 kinase alpha-1 (Fragment) OS=Mus musculus GN=Rps6ka1 PE=1 SV=1	368.181	401.271	345.715	370.719	373.731	362.715	394.795	390.05	374.935
F6QYE1	Calsequestrin OS=Mus musculus GN=Casq2 PE=1 SV=1	402.966	480.817	292.038	376.969	457.55	345.922	347.845	398.873	243.832
F6RPJ9	Insulin-degrading enzyme (Fragment) OS=Mus musculus GN=Ide PE=1 SV=1	405.389	383.312	384.006	320.874	423.089	358.545	343.468	372.736	334.01
F6RT34	Myelin basic protein (Fragment) OS=Mus musculus GN=Mbp PE=1 SV=1	343.24	375.67	363.874	445.505	359.774	371.579	380.03	355.228	412.169
F6SEU4	Ras/Rap GTPase-activating protein SynGAP OS=Mus musculus GN=Syngap1 PE=1 SV=2	348.074	355.355	384.828	377.559	386.39	379.446	375.726	377.705	394.424
F6SHS0	Microtubule-actin cross-linking factor 1 (Fragment) OS=Mus musculus GN=Macf1 PE=1 SV=1	389.67	381.575	337.809	380.423	373.652	375.117	385.351	379.692	373.639
F6SJM7	Fucose mutarotase (Fragment) OS=Mus musculus GN=Fuom PE=1 SV=1	464.024	344.016	297.304	337.423	404.208	372.501	336.896	385.654	397.753
F6SW83	Uncharacterized protein OS=Mus musculus GN=Gm10477 PE=4 SV=1	316.676	359.43	226.024	447.781	370.02	357.044	500.52	389.696	523.477
F6SZ47	Serine/threonine-protein kinase B-raf (Fragment) OS=Mus musculus GN=Braf PE=1 SV=1	368.147	383.191	385.169	378.729	366.395	387.76	366.881	382.402	348.162
F6T2M1	Otoconin-90 (Fragment) OS=Mus musculus GN=Oc90 PE=3 SV=1	518.81	303.61	375.617	156.344	505.735	201.455	434.188	253.187	524.5
F6TQQ9	Cysteine-rich PDZ-binding protein (Fragment) OS=Mus musculus GN=Cript PE=1 SV=1	198.929	269.125	411.065	574.458	319.366	395.66	407.802	400.877	534.46
F6TQW2	Immunoglobulin heavy constant gamma 2C OS=Mus musculus GN=Ighg2c PE=1 SV=1	155.185	416.624	209.301	227.049	434.905	576.167	458.492	370.722	638.519
F6TVX7	Uncharacterized protein (Fragment) OS=Mus musculus GN=Gm20671 PE=3 SV=1	273.715	388.787	325.41	448.427	294.038	422.334	472.635	388.327	462.89
F6TYB7	Myelin basic protein (Fragment) OS=Mus musculus GN=Mbp PE=1 SV=1	347.209	379.014	365.979	446.014	362.398	369.747	371.319	353.503	407.045
F6TZU3	Gigaxonin (Fragment) OS=Mus musculus GN=Gan PE=1 SV=1	444.634	423.87	321.95	348.128	394.722	359.947	312.39	386.003	337.056
F6U2S8	Serine/threonine-protein kinase WNK1 (Fragment) OS=Mus musculus GN=Wnk1 PE=1 SV=1	194.156	296.357	355.849	487.657	314.502	402.793	467.016	403.675	602.399
F6U329	Sodium channel protein OS=Mus musculus GN=Scn8a PE=1 SV=2	362.754	364.257	376.674	373.081	364.157	369.376	384.528	381.53	404.082
F6V035	Coiled-coil domain-containing 149 OS=Mus musculus GN=Ccdc149 PE=1 SV=1	378.669	342.769	346.198	422.093	397.851	384.818	406.73	356.283	354.479
F6V2U0	Type I inositol 3,4-bisphosphate 4-phosphatase OS=Mus musculus GN=Inpp4a PE=1 SV=1	362.932	384.296	390.149	371.134	363.478	369.826	378.093	379.477	371.285
F6V3Y9	Autophagy-related protein 2 homolog A (Fragment) OS=Mus musculus GN=Atg2a PE=1 SV=1	352.636	378.881	397.031	336.589	334.167	395.468	379.056	396.073	402.043
F6VJ09	Breast carcinoma-amplified sequence 3 homolog (Fragment) OS=Mus musculus GN=Bcas3 PE=1 SV=1	373.068	371.318	440.444	417.275	290.405	366.9	327.215	317.491	466.675
F6VQZ6	Protein shisa-6 homolog (Fragment) OS=Mus musculus GN=Shisa6 PE=1 SV=1	334.32	392.821	345.613	409.36	357.118	366.127	428.787	384.29	397.523
F6VW30	14-3-3 protein theta (Fragment) OS=Mus musculus GN=Ywhaq PE=1 SV=1	404.513	356.796	401.214	356.595	404.533	378.357	319.6	347.177	361.351
F6W8I0	YjeF N-terminal domain-containing protein 3 OS=Mus musculus GN=Yjefn3 PE=1 SV=2	388.209	392.492	328.832	363.519	392.814	348.326	391.81	417.885	349.974
F6W8Z8	Dynamin-1 (Fragment) OS=Mus musculus GN=Dnm1 PE=1 SV=1	393.94	376.282	370.914	366.095	414.953	366.647	371.215	355.242	335.395
F6WHQ7	Glutathione S-transferase Mu 1 (Fragment) OS=Mus musculus GN=Gstm1 PE=1 SV=1	336.257	371.582	317.91	397.56	394.447	321.08	475.276	397.866	417.12
F6WJB7	Ubiquitin carboxyl-terminal hydrolase 34 (Fragment) OS=Mus musculus GN=Usp34 PE=1 SV=1	362.551	387.847	350.727	340.886	362.702	408.396	381.87	386.935	394.219
F6WMJ3	Rho guanine nucleotide exchange factor 6 OS=Mus musculus GN=Arhgef6 PE=1 SV=1	392.207	374.542	379.024	414.596	360.956	377.913	372.702	376.762	319.108
F6X398	SURP and G-patch domain-containing protein 2 (Fragment) OS=Mus musculus GN=Sugp2 PE=1 SV=1	341.217	367.937	339.623	397.5	362.149	373.092	418.454	372.194	442.131
F6X4N5	Syntaxin-16 OS=Mus musculus GN=Stx16 PE=1 SV=1	392.858	359.074	303.982	364.965	453.399	381.695	408.838	388.556	318.522
F6XCT0	Microtubule-actin cross-linking factor 1 (Fragment) OS=Mus musculus GN=Macf1 PE=1 SV=1	393.006	381.945	333.915	379.075	374.645	375.324	384.535	379.219	374.406
F6Y3V0	Receptor-type tyrosine-protein phosphatase F (Fragment) OS=Mus musculus GN=Ptprf PE=1 SV=1	368.525	383.029	375.3	360.516	393.844	365.982	394.888	371.976	353.486
F6Y616	Polyadenylate-binding protein-interacting protein 1 OS=Mus musculus GN=Paip1 PE=1 SV=2	336.972	324.983	367.309	389.399	400.449	359.487	368.549	383.86	466.022
F6Y6A6	V-set and transmembrane domain-containing protein 2A OS=Mus musculus GN=Vstm2a PE=1 SV=1	377.141	341.134	301.672	442.671	364.264	480.517	459.095	291.704	360.232
F6YRW4	F-box and leucine-rich repeat protein 11 OS=Mus musculus GN=Kdm2a PE=1 SV=2	347.753	308.922	326.01	493.609	326.933	341.608	455.707	377.031	481.996
F6YVP7	Uncharacterized protein OS=Mus musculus GN=Gm10260 PE=3 SV=2	388.186	351.081	393.459	360.854	424.325	351.327	348.782	370.156	356.154
F6Z1R4	Clathrin heavy chain 1 (Fragment) OS=Mus musculus GN=Cltc PE=1 SV=1	440.037	347.949	359.466	298.574	475.76	364.9	334.848	366.79	316.601
F6ZAW1	Caldesmon 1 (Fragment) OS=Mus musculus GN=Cald1 PE=1 SV=1	373.721	206.108	404.305	492.585	402.366	363.439	291.57	291.56	569.676
F6ZDS4	Nucleoprotein TPR OS=Mus musculus GN=Tpr PE=1 SV=1	409.718	373.588	368.561	395.78	369.995	359.403	346.005	364.958	369.006
F6ZFU0	Elongation factor 1-delta (Fragment) OS=Mus musculus GN=Eef1d PE=1 SV=1	365.886	378.925	352.843	398.167	384.335	375.639	385.836	366.906	376.287
F6ZGI7	Molybdopterin synthase sulfur carrier subunit OS=Mus musculus GN=Mocs2 PE=1 SV=1	479.352	383.89	345.041	402.671	453.462	288.904	328.842	356.867	276.568
F6ZGR6	RIKEN cDNA D430041D05 gene (Fragment) OS=Mus musculus GN=D430041D05Rik PE=1 SV=1	316.718	353.509	367.847	419.111	366.507	399.352	381.622	385.241	422.475
F6ZHD8	1,4-alpha-glucan-branching enzyme OS=Mus musculus GN=Gbe1 PE=1 SV=2	310.647	399.528	331.543	460.458	319.404	383.732	434.817	401.586	406.295
F6ZKC7	Cleavage stimulation factor subunit 2 (Fragment) OS=Mus musculus GN=Cstf2 PE=1 SV=1	371.65	334.06	407.929	309.973	383.449	347.343	397.951	340.9	467.07
F6ZYH6	Gamma-aminobutyric acid receptor subunit beta-3 OS=Mus musculus GN=Gabrb3 PE=1 SV=1	382.42	375.804	382.897	342.495	396.874	408.505	327.361	408.775	313.936
F7A0B0	Myelin basic protein (Fragment) OS=Mus musculus GN=Mbp PE=1 SV=1	343.063	374.836	364.492	445.111	359.953	371.371	380.21	354.93	413.058
F7A4A7	Otogelin-like protein OS=Mus musculus GN=Otogl PE=1 SV=1	297.232	333.66	312.767	379.813	417.098	532.155	380.418	398.305	359.848
F7AA26	Paralemmin A kinase anchor protein (Fragment) OS=Mus musculus GN=Pakap PE=1 SV=1	393.717	361.166	383.825	383.233	356.07	379.208	359.099	355.782	390.579
F7AAP4	Calcium-transporting ATPase OS=Mus musculus GN=Atp2b4 PE=1 SV=1	402.623	352.797	378.44	356.052	412.539	384.809	343.542	374.834	333.855
F7ADT6	GTPase-activating protein and VPS9 domain-containing protein 1 (Fragment) OS=Mus musculus GN=Gapvd1 PE=1 SV=1	434.418	375.35	374.418	355.239	396.633	342.836	379.719	349.57	327.391
F7BAB2	Transmembrane protein 132B OS=Mus musculus GN=Tmem132b PE=1 SV=1	412.349	345.755	375.683	347.303	399.716	350.342	352.841	357.716	403.069
F7BJK1	Protocadherin 1 (Fragment) OS=Mus musculus GN=Pcdh1 PE=1 SV=1	363.918	343.667	424.012	394.034	375.501	426.02	328.426	339.976	358.124
F7BNZ5	Breast carcinoma-amplified sequence 1 homolog (Fragment) OS=Mus musculus GN=Bcas1 PE=1 SV=1	399.762	271.364	417.123	388.818	405.741	375.813	315.003	320.645	453.23
F7BWT7	Tetraspanin-15 OS=Mus musculus GN=Tspan15 PE=1 SV=2	439.661	345.341	432.774	341.003	307.015	368.076	337.58	314.647	442.393
F7C376	Voltage-dependent L-type calcium channel subunit alpha OS=Mus musculus GN=Cacna1c PE=1 SV=2	319.153	361.053	391.033	387.419	326.178	397.73	395.061	404.391	424.466
F7C3I9	Afadin (Fragment) OS=Mus musculus GN=Afdn PE=1 SV=1	383.922	391.78	401.149	399.198	366.364	392.422	301.584	348.703	361.904
F7C846	Metaxin-1 OS=Mus musculus GN=Mtx1 PE=1 SV=1	369.386	382.324	371.918	400.172	368.686	347.746	368.898	400.407	369.142
F7CDY3	4-hydroxybenzoate polyprenyltransferase, mitochondrial (Fragment) OS=Mus musculus GN=Coq2 PE=4 SV=1	323.812	318.971	415.637	422.045	342.597	463.882	386.096	425.643	294.567
F7CVJ5	AHNAK nucleoprotein 2 (Fragment) OS=Mus musculus GN=Ahnak2 PE=1 SV=1	422.889	350.94	338.296	374.191	387.597	416.992	365.19	338.433	360.31
F7CZ64	Voltage-dependent calcium channel gamma subunit OS=Mus musculus GN=Cacng8 PE=1 SV=2	310.05	368.707	364.611	397.771	349.91	437.202	402.554	395.729	386.033
F7D291	MTSS1-like protein (Fragment) OS=Mus musculus GN=Mtss1l PE=1 SV=1	335.681	262.656	313.269	515.664	467.127	342.929	350.874	320.419	528.363
F7DBB3	AHNAK nucleoprotein 2 (Fragment) OS=Mus musculus GN=Ahnak2 PE=1 SV=1	449.205	334.247	325.862	359.938	398.4	385.941	387.209	337.822	372
F7DCH5	CLIP-associating protein 2 OS=Mus musculus GN=Clasp2 PE=1 SV=1	370.449	382.369	391.692	381.153	367.824	381.582	374.736	371.26	344.592
F7DEU6	Inosine-5'-monophosphate dehydrogenase OS=Mus musculus GN=Impdh1 PE=1 SV=2	359.596	331.512	361.89	449.316	392.258	350.953	453.029	387.823	323.687
F8SLQ1	PEX5-related protein OS=Mus musculus GN=Pex5l PE=1 SV=1	404.579	375.709	405.273	367.471	379.314	362.415	360.513	363.063	321.361
F8VPK0	Tetratricopeptide repeat domain 37 OS=Mus musculus GN=Ttc37 PE=1 SV=1	342.853	360.766	343.35	394.034	366.959	373.465	418.621	378.749	432.339
F8VPK5	Rho-associated protein kinase OS=Mus musculus GN=Rock2 PE=1 SV=1	425.061	384.429	366.146	365.234	408.681	369.087	319.202	368.782	322.015
F8VPK8	Protocadherin 9 OS=Mus musculus GN=Pcdh9 PE=1 SV=1	397.378	321.85	405.963	375.521	379.547	356.838	363.141	338.575	417.334
F8VPL2	Phosphatidylinositol 4-phosphate 3-kinase C2 domain-containing subunit alpha OS=Mus musculus GN=Pik3c2a PE=1 SV=1	164.35	389.491	319.371	461.148	269.896	414.056	545.993	452.698	533.682
F8VPN4	Amylo-1,6-glucosidase, 4-alpha-glucanotransferase OS=Mus musculus GN=Agl PE=1 SV=1	366.499	374.645	369.718	339.376	391.865	367.088	396.302	382.733	380.487
F8VPP8	Zinc finger CCCH type-containing 7B OS=Mus musculus GN=Zc3h7b PE=1 SV=1	366.791	346.072	375.574	378.937	387.522	377.472	408.504	360.36	379.156
F8VPQ1	Dedicator of cytokinesis protein 3 OS=Mus musculus GN=Dock3 PE=1 SV=1	351.154	381.143	375.949	394.081	352.952	385.001	387.181	385.59	375.189
F8VPR1	Leiomodin-1 OS=Mus musculus GN=Lmod1 PE=1 SV=1	498.155	135.484	425.612	484.468	512.8	285.183	199.872	260.679	503.355
F8VPR5	CREB-binding protein OS=Mus musculus GN=Crebbp PE=1 SV=1	383.062	351.762	420.409	375.877	330.816	366.462	338.54	368.791	423.153
F8VPT6	Ecotropic viral integration site 5 protein OS=Mus musculus GN=Evi5 PE=1 SV=1	303.459	387.352	435.293	495.094	323.371	377.358	382.22	309.235	403.67
F8VPU2	FERM, RhoGEF and pleckstrin domain-containing protein 1 OS=Mus musculus GN=Farp1 PE=1 SV=1	366.379	360.534	391.929	360.07	363.208	373.792	406.819	362.263	389.748
F8VPV8	Tetratricopeptide repeat protein 41 OS=Mus musculus GN=Ttc41 PE=4 SV=1	501.293	471.432	321.161	401.414	325.034	340.811	346.265	309.222	311.455
F8VPY2	Transcription initiation factor TFIID subunit 5 OS=Mus musculus GN=Taf5 PE=1 SV=1	290.417	322.07	262.802	506.737	355.123	318.27	546.147	374.865	544.969
F8VPZ3	Ubiquitin-specific peptidase 32 OS=Mus musculus GN=Usp32 PE=1 SV=1	339.765	388.538	382.9	351.189	356.202	382.884	430.982	375.051	381.243
F8VQ05	FRY-like transcription coactivator OS=Mus musculus GN=Fryl PE=1 SV=1	352.194	432.69	437.767	341.029	332.536	367.275	368.378	363.994	355.922
F8VQ54	Endoribonuclease Dicer OS=Mus musculus GN=Dicer1 PE=1 SV=1	421.534	326.562	406.717	341.522	427.055	366.173	336.37	287.35	409.905
F8VQ70	S phase cyclin A-associated protein in the ER OS=Mus musculus GN=Scaper PE=1 SV=1	398.498	356.78	371.729	412.586	345.057	375.071	358.907	370.144	384.207
F8VQ87	5'-3' exoribonuclease 1 OS=Mus musculus GN=Xrn1 PE=1 SV=1	339.689	295.467	377.478	408.214	382.558	323.152	431.325	360.406	499.907
F8VQ93	PH-interacting protein OS=Mus musculus GN=Phip PE=1 SV=1	428.739	247.783	443.716	324.006	437.928	331.071	270.172	324.136	499.526
F8VQ95	Transforming acidic coiled-coil-containing protein 1 OS=Mus musculus GN=Tacc1 PE=1 SV=1	368.993	407.599	351.111	352.431	382.259	399.36	360.952	369.502	373.339
F8VQB8	Neuronal pentraxin chromo domain OS=Mus musculus GN=Npcd PE=4 SV=1	324.9	348.328	411.123	378.462	377.035	504.306	302.753	362.731	351.401
F8VQC1	Signal recognition particle subunit SRP72 OS=Mus musculus GN=Srp72 PE=1 SV=1	379.048	355.892	375.639	379.898	391.147	354.729	358.183	381.221	390.948
F8VQD1	Protein polybromo-1 OS=Mus musculus GN=Pbrm1 PE=1 SV=1	392.906	391.321	373.68	347.664	386.13	353.299	380.627	357.143	371.566
F8VQD7	Receptor-type tyrosine-protein phosphatase gamma OS=Mus musculus GN=Ptprg PE=1 SV=1	378.333	409.243	410.313	333.39	340.469	466.466	285.737	418.072	282.126
F8VQE9	Arf-GAP with GTPase, ANK repeat and PH domain-containing protein 3 OS=Mus musculus GN=Agap3 PE=1 SV=1	356.079	362.86	362.757	372.839	415.757	379.551	407.609	357.868	364.422
F8VQH0	Tyrosine-protein kinase OS=Mus musculus GN=Abl2 PE=1 SV=1	419.68	345.518	459.153	299.219	382.646	398.13	322.44	342.271	326.862
F8VQJ3	Laminin subunit gamma-1 OS=Mus musculus GN=Lamc1 PE=1 SV=1	393.497	391.718	387.452	354.057	351.122	396.176	340.469	367.962	364.853
F8VQK3	Guanylate cyclase 1, soluble, alpha 2 OS=Mus musculus GN=Gucy1a2 PE=1 SV=1	386.407	376.634	372.51	354.823	375.249	389.46	370.828	388.554	342.828
F8VQK5	SAM and SH3 domain-containing protein 1 OS=Mus musculus GN=Sash1 PE=1 SV=1	391.257	385.434	386.06	358.31	380.273	378.706	363.798	356.462	349.072
F8VQL9	Nuclear receptor corepressor 2 OS=Mus musculus GN=Ncor2 PE=1 SV=1	272.715	373.662	311.893	459.463	308.839	371.009	547.941	395.169	458.164
F8VQN6	Rho guanine nucleotide exchange factor 12 OS=Mus musculus GN=Arhgef12 PE=1 SV=1	399.907	370.168	397.863	358.592	349.072	341.127	383.699	356.766	400.706
F8WGF2	Nitric oxide synthase, brain OS=Mus musculus GN=Nos1 PE=1 SV=1	344.942	391.671	413.494	372.362	335.198	409.919	350.354	388.947	360.943
F8WGM5	Syntaxin-binding protein 2 (Fragment) OS=Mus musculus GN=Stxbp2 PE=1 SV=1	397.877	191.552	411.011	365.588	485.642	355.531	336.342	316.846	486.306
F8WGQ9	BTB/POZ domain-containing adapter for CUL3-mediated RhoA degradation protein 3 OS=Mus musculus GN=Kctd10 PE=1 SV=1	330.228	407.537	387.332	336.801	413.346	465.499	295.695	413.447	292.59
F8WGR0	Alpha-adducin OS=Mus musculus GN=Add1 PE=1 SV=1	397.329	373.369	393.56	382.742	382.043	381.938	321.329	360.614	349.974
F8WGT1	Adenosylhomocysteinase OS=Mus musculus GN=Ahcyl2 PE=1 SV=1	361.993	379.351	376.475	395.489	391.577	368.378	368.955	368.919	362.808
F8WGX5	DmX-like protein 1 OS=Mus musculus GN=Dmxl1 PE=1 SV=1	354.64	387.818	413.112	349.048	346.748	388.061	379.035	390.019	354.792
F8WHB1	Calcium-transporting ATPase OS=Mus musculus GN=Atp2b2 PE=1 SV=1	391.091	376.18	375.945	374.67	393.013	356.672	367.748	364.154	357.895
F8WHL2	Coatomer subunit alpha OS=Mus musculus GN=Copa PE=1 SV=1	365.149	375.504	373.367	368.064	374.916	369.896	385.121	382.823	380.133
F8WHN2	Chromobox protein homolog 7 OS=Mus musculus GN=Cbx7 PE=1 SV=1	306.8	400.021	297.244	343.896	357.733	355.543	555.179	339.326	501.055
F8WHT3	Protein PRRC2B OS=Mus musculus GN=Prrc2b PE=1 SV=1	349.257	368.591	339.914	388.514	361.449	388.625	424.983	374.122	412
F8WHU5	Sister chromatid cohesion protein PDS5 homolog B OS=Mus musculus GN=Pds5b PE=1 SV=1	348.796	397.942	343.363	366.766	370.45	379.408	381.989	399.998	400.869
F8WHU6	Cadherin-9 OS=Mus musculus GN=Cdh9 PE=1 SV=1	387.382	355.599	386.705	374.958	360.18	383.485	370.206	376.44	368.336
F8WHW6	Phosphatidylinositol 4-phosphate 5-kinase type-1 gamma OS=Mus musculus GN=Pip5k1c PE=1 SV=1	382.54	378.436	392.363	365.056	381.908	377.9	361.593	370.128	342.557
F8WI30	Sorting nexin-7 OS=Mus musculus GN=Snx7 PE=1 SV=1	413.299	342.207	450.786	332.951	418.882	366.689	288.957	355.898	328.774
F8WIA1	CAP-Gly domain-containing linker protein 1 OS=Mus musculus GN=Clip1 PE=1 SV=1	375.152	391.002	387.574	369.825	372.209	392.869	332.278	385.737	346.053
F8WID5	Tropomyosin alpha-1 chain OS=Mus musculus GN=Tpm1 PE=1 SV=1	406.246	401.534	400.479	358.151	349.721	407.417	309.869	377.706	317.98
F8WIJ0	Solute carrier family 12 member 4 OS=Mus musculus GN=Slc12a4 PE=1 SV=2	441.516	378.075	334.397	322.976	438.984	345.856	379.291	380.048	308.012
F8WIJ5	Phospholipase DDHD1 OS=Mus musculus GN=Ddhd1 PE=1 SV=1	388.662	394.445	414.543	296.441	372.1	377.161	342.537	378.126	362.158
F8WIK0	Anamorsin OS=Mus musculus GN=Ciapin1 PE=1 SV=2	273.124	474.673	331.469	463.559	356.5	384.29	372.94	417.608	362.525
F8WIU1	RIKEN cDNA 1700037H04 gene OS=Mus musculus GN=1700037H04Rik PE=1 SV=1	294.406	374.968	391.443	398.117	364.582	421.473	385.449	374.311	401.634
F8WIU7	Putative protein arginine N-methyltransferase 9 OS=Mus musculus GN=Prmt9 PE=1 SV=1	413.164	374.975	358.599	419.518	312.027	405.236	326.705	387.982	369.603
F8WIV2	Serine (or cysteine) peptidase inhibitor, clade B, member 6a OS=Mus musculus GN=Serpinb6a PE=1 SV=1	428.352	356.977	413.141	321.859	393.189	330.775	375.163	338.655	365.564
F8WIZ7	Oxysterol-binding protein OS=Mus musculus GN=Osbpl6 PE=1 SV=1	390.414	373.033	412.288	342.486	354.218	337.738	409.997	348.341	388.539
F8WJ05	Inter-alpha-trypsin inhibitor heavy chain H1 OS=Mus musculus GN=Itih1 PE=1 SV=1	405.297	379.306	343.037	370.985	340.78	286.674	447.159	425.008	392.012
F8WJ48	Netrin-G1 OS=Mus musculus GN=Ntng1 PE=1 SV=2	381.48	410.031	464.599	370.921	297.851	351.653	337.552	420.801	303.771
F8WJ93	Echinoderm microtubule-associated protein-like 4 OS=Mus musculus GN=Eml4 PE=1 SV=1	343.493	365.98	379.994	404.756	346.052	401.088	398.372	378.568	378.318
F8WJ98	Transmembrane and coiled-coil domains protein 1 (Fragment) OS=Mus musculus GN=Tmcc1 PE=1 SV=2	392.218	395.027	369.827	350.323	392.472	383.417	364.061	371.211	329.302
F8WJD4	Symplekin OS=Mus musculus GN=Sympk PE=1 SV=1	362.514	369.577	348.098	382.174	380.899	347.257	414.485	369.184	421.135
F8WJE0	Deoxynucleoside triphosphate triphosphohydrolase SAMHD1 OS=Mus musculus GN=Samhd1 PE=1 SV=1	392.873	388.919	408.405	316.315	346.154	358.603	332.146	410.123	382.757
G1K381	Ephrin type-A receptor 6 OS=Mus musculus GN=Epha6 PE=1 SV=1	370.057	350.961	312.528	377.848	408.474	424.107	358.333	384.086	397.108
G3UVU2	Splicing factor 3A subunit 2 OS=Mus musculus GN=Sf3a2 PE=1 SV=1	453.889	344.74	390.079	307.999	383.088	341.704	340.909	412.424	337.32
G3UVW1	Mpv17 transgene, kidney disease mutant, isoform CRA_b OS=Mus musculus GN=Mpv17 PE=1 SV=1	362.379	455.715	352.125	299.716	356.243	461.137	327.735	448.544	278.326
G3UW39	Cytidine and dCMP deaminase domain-containing protein 1 OS=Mus musculus GN=Cdadc1 PE=1 SV=1	589.967	403.305	303.723	365.612	455.456	339.596	282.416	288.032	227.579
G3UW46	Mitochondrial inner membrane protease ATP23 homolog OS=Mus musculus GN=Atp23 PE=1 SV=1	330.333	402.294	356.69	322.748	335.928	345.136	442.048	457.63	410.667
G3UW70	MCG21719 OS=Mus musculus GN=Lamtor5 PE=1 SV=1	344.417	354.855	358.518	366.899	379.654	403.714	424.802	385.061	376.729
G3UW85	Enhancer of rudimentary homolog OS=Mus musculus GN=Erh PE=1 SV=1	368.975	347.759	364.408	406.094	394.376	414.356	293.934	395.922	379.016
G3UW94	MCG14259, isoform CRA_b OS=Mus musculus GN=U2af1 PE=1 SV=1	346.509	343.177	344.769	382.026	350.046	374.575	438.11	403.143	432.757
G3UWB8	MCG121122 OS=Mus musculus GN=9130204L05Rik PE=3 SV=1	162.568	351.543	411.54	347.426	273.219	464.356	585.384	433.891	472.916
G3UWD5	A-kinase anchor protein inhibitor 1 OS=Mus musculus GN=Akain1 PE=2 SV=1	343.954	411.896	319.542	347.069	400.159	385.575	362.342	436.014	376.566
G3UWD7	MCG123152 OS=Mus musculus GN=Gm10269 PE=1 SV=1	401.778	392.153	447.684	340.983	347.936	340.551	396.377	328.352	338.498
G3UWG2	T-cell lymphoma invasion and metastasis 1 OS=Mus musculus GN=Tiam1 PE=1 SV=1	335.286	428.573	358.845	397.327	352.798	399.017	342.109	380.488	393.594
G3UWS4	Serine/threonine-protein phosphatase 2A 65 kDa regulatory subunit A beta isoform OS=Mus musculus GN=Ppp2r1b PE=1 SV=1	400.884	422.097	325.486	368.574	446.475	363.752	347.552	375.525	295.193
G3UWV4	Serine/threonine-protein kinase BRSK2 OS=Mus musculus GN=Brsk2 PE=1 SV=1	371.048	346.603	378.303	348.759	384.191	365.978	400.013	366.495	411.454
G3UX33	Sorting nexin-14 OS=Mus musculus GN=Snx14 PE=1 SV=1	279.977	384.843	422.721	332.139	346.258	410.803	431.832	360.03	433.078
G3UX38	Rho GTPase-activating protein 21 (Fragment) OS=Mus musculus GN=Arhgap21 PE=1 SV=1	355.441	406.274	353.395	333.569	416.226	433.979	357.468	372.061	327.177
G3UXA6	Polypyrimidine tract-binding protein 3 OS=Mus musculus GN=Ptbp3 PE=1 SV=1	398.387	338.559	357.641	356.384	406.624	336.837	392.091	381.712	397.339
G3UXL2	Phosphoribosyl pyrophosphate synthetase 1-like 3 OS=Mus musculus GN=Prps1l3 PE=3 SV=1	414.28	368.312	386.587	370.065	400.472	335.807	376.287	362.782	329.146
G3UXW9	COP9 signalosome complex subunit 1 OS=Mus musculus GN=Gps1 PE=1 SV=1	383.618	368.191	392.095	346.346	377.903	370.484	370.981	372.226	371.892
G3UY42	Polyadenylate-binding protein 2 OS=Mus musculus GN=Pabpn1 PE=1 SV=1	441.56	360.285	318.489	378.809	452.648	302.176	426.789	329.1	348.561
G3UY52	Probable ubiquitin carboxyl-terminal hydrolase FAF-X (Fragment) OS=Mus musculus GN=Usp9x PE=1 SV=1	357.187	353.555	405.086	341.513	383.527	436.361	333.11	387.072	351.609
G3UYP1	Ras-related GTP-binding protein B (Fragment) OS=Mus musculus GN=Rragb PE=1 SV=1	406.108	348.779	295.77	360.499	443.975	381.589	367.636	368.373	394.565
G3UYW1	WD repeat and FYVE domain-containing protein 3 OS=Mus musculus GN=Wdfy3 PE=1 SV=1	338.943	383.003	372.603	358.119	380.691	384.998	407.954	388.431	370.549
G3UZ31	Mediator of RNA polymerase II transcription subunit 11 OS=Mus musculus GN=Med11 PE=1 SV=1	200.417	372.003	302.635	563.941	238.398	316.165	526.518	541.395	509.706
G3UZA7	Small ubiquitin-related modifier OS=Mus musculus GN=Sumo3 PE=1 SV=1	440.512	278.365	351.403	312.781	538.953	341.522	297.575	360.661	383.272
G3UZJ2	Microtubule-associated protein (Fragment) OS=Mus musculus GN=Map2 PE=1 SV=8	376.239	340.66	388.291	420.148	358.065	391.359	358.752	348.309	396.232
G3UZK1	Guanine nucleotide-binding protein subunit gamma OS=Mus musculus GN=Gm20503 PE=3 SV=1	415.266	373.27	388.617	302.277	439.991	532.306	243.434	382.936	200.208
G3UZM1	Probable JmjC domain-containing histone demethylation protein 2C OS=Mus musculus GN=Jmjd1c PE=1 SV=1	383.592	333.659	342.402	503.741	375.489	340.014	456.182	329.304	358.35
G3UZM4	Cell adhesion molecule 2 (Fragment) OS=Mus musculus GN=Cadm2 PE=1 SV=1	370.873	333.872	367.106	393.927	405.681	379.965	366.805	355.468	402.512
G3UZV6	Microtubule-associated protein (Fragment) OS=Mus musculus GN=Map2 PE=1 SV=1	378.16	349.971	393.461	411.048	371.351	403.939	336.788	346.43	373.193
G3X8Q6	Kinesin-like protein OS=Mus musculus GN=Kifc2 PE=1 SV=1	286.492	345.127	342.516	413.128	359.919	374.676	435.524	418.425	472.464
G3X8R0	Receptor expression-enhancing protein OS=Mus musculus GN=Reep5 PE=1 SV=1	335.16	362.987	391.051	384.532	371.419	391.639	353.226	365.053	428.456
G3X8R5	Glutamine-rich protein 1 OS=Mus musculus GN=Qrich1 PE=1 SV=1	380.054	398.271	379.378	401.579	376.048	348.84	366.039	365.121	351.869
G3X8S8	MCG14499 OS=Mus musculus GN=Tsen15 PE=1 SV=1	489.647	196.44	521.748	369.93	479.998	289.302	229.602	274.18	403.024
G3X8T2	RIKEN cDNA 5830416A07, isoform CRA_c OS=Mus musculus GN=Zc3h18 PE=1 SV=1	368.287	334.723	313.144	431.789	304.181	347.092	423.989	330.918	588.259
G3X8T3	Carboxypeptidase OS=Mus musculus GN=Ctsa PE=1 SV=1	376.899	418.31	389.496	340.498	367.077	377.599	366.001	417.2	294.234
G3X8T9	Serine (Or cysteine) peptidase inhibitor, clade A, member 3N, isoform CRA_a OS=Mus musculus GN=Serpina3n PE=1 SV=1	337.514	476.31	379.11	312.295	422.886	456.111	313.641	350.91	281.366
G3X8U3	MCG6895 OS=Mus musculus GN=2210016F16Rik PE=1 SV=1	348.151	396.233	369.816	360.122	383.055	393.4	394.028	385.492	346.054
G3X8V5	RIKEN cDNA 2610206B13, isoform CRA_b OS=Mus musculus GN=Rnf219 PE=1 SV=1	229.534	238.616	547.012	542.153	230.168	400.626	365.24	373.3	533.825
G3X8X1	RIKEN cDNA 2810439F02 OS=Mus musculus GN=Ttc39c PE=1 SV=1	393.097	381.667	374.016	344.906	361.391	380.721	349.86	407.675	358.163
G3X8X7	Vacuolar protein sorting 16 (Yeast) OS=Mus musculus GN=Vps16 PE=1 SV=1	350.58	409.061	360.551	397.954	361.482	360.192	397.536	410.508	343.379
G3X8Y3	N-alpha-acetyltransferase 15, NatA auxiliary subunit OS=Mus musculus GN=Naa15 PE=1 SV=1	391.774	399.662	370.705	352.392	378.339	369.105	398.011	355.523	342.232
G3X907	Odd Oz/ten-m homolog 3 (Drosophila) OS=Mus musculus GN=Tenm3 PE=1 SV=1	361.504	350.037	387.383	364.108	353.602	400.554	358.341	367.664	430.857
G3X914	Cullin 5 OS=Mus musculus GN=Cul5 PE=1 SV=1	386.815	390.857	397.724	346.495	381.072	369.864	366.451	361.859	344.054
G3X915	LysM and putative peptidoglycan-binding domain-containing protein 2 OS=Mus musculus GN=Lysmd2 PE=1 SV=1	273.967	355.247	350.299	405.935	299.366	411.706	483.456	399.981	486.452
G3X920	Armadillo repeat containing 8, isoform CRA_b OS=Mus musculus GN=Armc8 PE=1 SV=1	387.633	346.674	382.823	358.22	402.911	366.85	364.033	376.428	368.561
G3X928	SEC23-interacting protein OS=Mus musculus GN=Sec23ip PE=1 SV=1	354.009	389.272	383.235	345.997	341.874	375.526	409.074	373.385	409.559
G3X932	DNA segment, Chr 15, Wayne State University 169, expressed, isoform CRA_a OS=Mus musculus GN=Arhgap39 PE=1 SV=1	362.382	357.452	379.672	358.904	376.722	376.177	406.341	365.166	395.254
G3X934	MCG115964 OS=Mus musculus GN=Wdr70 PE=1 SV=1	417.406	429.588	352.65	364.549	418.492	338.828	321.191	354.193	335.19
G3X946	Dimethylaniline monooxygenase [N-oxide-forming] OS=Mus musculus GN=Gm4847 PE=3 SV=1	105.694	461.989	240.145	414.27	223.964	364.177	767.727	525.539	530.369
G3X956	Suppressor of Ty 16 OS=Mus musculus GN=Supt16 PE=1 SV=1	368.707	402.126	335.189	356.909	375.848	373.299	378.223	408.173	380.111
G3X959	Periphilin 1, isoform CRA_a OS=Mus musculus GN=Pphln1 PE=1 SV=1	461.362	313.294	269.159	368.071	425.419	384.814	430.205	389.131	326.311
G3X972	SEC24 related gene family, member C (S. cerevisiae), isoform CRA_a OS=Mus musculus GN=Sec24c PE=1 SV=1	399.509	391.054	391.268	354.77	366.328	363.299	353.654	374.711	349.978
G3X973	Stabilin 1, isoform CRA_a OS=Mus musculus GN=Stab1 PE=1 SV=1	305.402	343.613	464.673	448.917	273.725	376.662	395.649	426.197	377.898
G3X977	Inter-alpha trypsin inhibitor, heavy chain 2 OS=Mus musculus GN=Itih2 PE=1 SV=1	517.827	362.566	376.212	347.616	334.578	276.471	331.166	413.008	347.065
G3X983	T cell activation inhibitor, mitochondrial OS=Mus musculus GN=Tcaim PE=1 SV=1	388.373	403.845	357.113	324.478	395.216	404.987	368.869	414.245	286.935
G3X9A7	MCG49978 OS=Mus musculus GN=Plcxd3 PE=1 SV=1	362.888	416.905	353.923	304.755	452.632	412.947	343.787	401.78	285.543
G3X9C3	G protein-coupled receptor 22 OS=Mus musculus GN=Gpr22 PE=4 SV=1	318.315	372.049	306.936	372.216	363.772	441.484	451.3	283.85	524.1
G3X9E0	Ankyrin repeat domain-containing protein 45 OS=Mus musculus GN=Ankrd45 PE=1 SV=1	385.371	369.178	397.526	394.716	358.325	417.88	334.623	425.954	266.53
G3X9F4	Transmembrane protein 143 OS=Mus musculus GN=Tmem143 PE=1 SV=1	372.329	428.823	372.733	369.931	339.703	355.971	368.57	362.973	400.701
G3X9G4	Dynamin-2 OS=Mus musculus GN=Dnm2 PE=1 SV=1	405.283	374.459	381.794	369.821	384.385	378.174	352.648	365.412	332.754
G3X9H5	Huntingtin OS=Mus musculus GN=Htt PE=1 SV=1	353.643	320.516	394.62	394.682	402.322	387.481	358.287	360.372	403.545
G3X9H7	Metastasis suppressor 1, isoform CRA_e OS=Mus musculus GN=Mtss1 PE=1 SV=1	322.936	411.254	268.181	468.85	355.953	337.032	464.814	392.868	444.697
G3X9J0	Signal-induced proliferation-associated 1-like protein 3 OS=Mus musculus GN=Sipa1l3 PE=1 SV=1	330.746	358.763	367.563	409.693	375.7	403.066	366.738	372.986	413.468
G3X9K3	Brefeldin A-inhibited guanine nucleotide-exchange protein 1 OS=Mus musculus GN=Arfgef1 PE=1 SV=1	384.03	373.685	378.301	345.11	407.517	371.833	360.14	370.558	357.727
G3X9K4	SAPS domain family, member 2, isoform CRA_a OS=Mus musculus GN=Ppp6r2 PE=1 SV=1	362.101	375.825	311.466	386.962	376.992	394.528	403.502	392.812	397.811
G3X9L9	Myomegalin OS=Mus musculus GN=Pde4dip PE=1 SV=1	340.668	383.351	324.125	391.81	360.963	378.275	449.785	391.342	399.39
G3X9M0	28S ribosomal protein S29, mitochondrial OS=Mus musculus GN=Dap3 PE=1 SV=1	403.542	410.638	370.733	380.106	348.045	383.909	355.606	379.746	320.887
G3X9N3	MCG16539 OS=Mus musculus GN=Pnmal2 PE=1 SV=1	383.462	320.102	346.142	371.11	389.752	404.856	395.673	388.936	379.366
G3X9Q1	Integrin alpha 7 OS=Mus musculus GN=Itga7 PE=1 SV=1	371.136	396.997	277.62	440.961	341.409	371.955	480.072	345.053	414.453
G3X9Q2	Guanine nucleotide-binding protein subunit gamma OS=Mus musculus GN=Gng7 PE=1 SV=1	432.838	376.124	351.778	345.134	505.122	362.474	280.436	337.765	310.179
G3X9Q6	La-related protein 4 OS=Mus musculus GN=Larp4 PE=1 SV=1	353.12	365.553	453.707	279.337	380.125	414.602	368.201	349.692	365.533
G3X9V4	Glutamate receptor ionotropic, NMDA 2B OS=Mus musculus GN=Grin2b PE=1 SV=1	312.938	349.135	393.656	360.176	375.624	398.02	363.52	393.834	443.547
G3X9V7	MCG19133, isoform CRA_b OS=Mus musculus GN=A830010M20Rik PE=1 SV=1	315.429	302.658	391.979	446.61	353.621	400.899	354.494	356.394	496.004
G3X9W4	Nuclear receptor subfamily 2 group C member 2 OS=Mus musculus GN=Nr2c2 PE=1 SV=1	385.918	361.724	389.722	373.059	400.839	313.787	400.897	373.891	364.237
G3X9X1	Kelch repeat and BTB (POZ) domain-containing 2 OS=Mus musculus GN=Kbtbd2 PE=1 SV=1	328.137	379.838	354.173	374.615	363.669	375.884	452.287	384.683	399.315
G3X9X7	Activated CDC42 kinase 1 OS=Mus musculus GN=Tnk2 PE=1 SV=1	235.486	393.798	310.262	473.333	323.334	376.761	561.29	399.247	441.258
G3X9Y1	Synaptotagmin III, isoform CRA_a OS=Mus musculus GN=Syt3 PE=1 SV=1	363.311	381.901	379.888	358.031	349.305	396.482	376.613	383.738	383.276
G3X9Y3	F-box/LRR-repeat protein 21 OS=Mus musculus GN=Fbxl21 PE=4 SV=1	72.7285	329.986	127.989	794.875	205.23	245.153	908.128	452.132	685.509
G3X9Y5	Ubiquitin conjugation factor E4 A OS=Mus musculus GN=Ube4a PE=1 SV=1	384.332	371.479	407.02	341.23	391.343	375.741	328.869	376.55	359.922
G3X9Y9	Myosin Vb, isoform CRA_a OS=Mus musculus GN=Myo5b PE=1 SV=1	502.124	358.552	392.34	316.056	489.241	335.377	284.28	328.829	249.919
G3X9Z4	Cleavage and polyadenylation factor subunit homolog (S. cerevisiae) OS=Mus musculus GN=Pcf11 PE=1 SV=1	169.987	399.732	271.507	490.148	298.24	391.728	547.427	485.581	509.202
G3X9Z6	Stathmin-4 OS=Mus musculus GN=Stmn4 PE=1 SV=1	380.286	208.005	284.045	403.539	493.6	315.576	410.194	349.293	574.756
G3X9Z7	Intraflagellar transport 88 homolog (Chlamydomonas) OS=Mus musculus GN=Ift88 PE=1 SV=1	330.79	363.168	443.132	356.54	372.888	399.287	406.526	351.087	343.873
G3XA00	Glutamate receptor, metabotropic 4 OS=Mus musculus GN=Grm4 PE=1 SV=1	376.276	419.991	314.22	391.186	402.563	332.866	414.456	364.514	374.572
G3XA17	Eukaryotic translation initiation factor 4 gamma 2 OS=Mus musculus GN=Eif4g2 PE=1 SV=1	387.484	386.859	402.253	337.753	382.892	377.139	351.717	366.319	346.438
G3XA20	Glutamate receptor-interacting protein 2 OS=Mus musculus GN=Grip2 PE=1 SV=1	405.367	374.471	322.838	398.27	416.737	388.844	397.291	360.801	304.406
G3XA34	Zinc finger protein 316 OS=Mus musculus GN=Zfp316 PE=1 SV=1	223.735	276.086	321.427	504.001	318.785	432.585	494.11	378.462	579.657
G3XA53	Oligodendrocyte myelin glycoprotein OS=Mus musculus GN=Omg PE=1 SV=1	396.897	347.941	378.458	362	447.958	370.814	320.984	350.157	360.362
G3XA57-2	Isoform 2 of Rab11 family-interacting protein 2 OS=Mus musculus GN=Rab11fip2	363.523	367.494	425.864	353.421	356.139	387.807	378.462	365.271	358.943
G5E814	MCG5603 OS=Mus musculus GN=Ndufa11 PE=1 SV=1	347.322	372.666	346.68	301.032	532.006	421.361	343.758	383.958	284.66
G5E825	DNA segment, Chr 10, ERATO Doi 610, expressed, isoform CRA_b OS=Mus musculus GN=Arhgef25 PE=1 SV=1	376.595	329.827	345.819	314.135	471.389	435.1	376.96	376.543	319.937
G5E829	Plasma membrane calcium-transporting ATPase 1 OS=Mus musculus GN=Atp2b1 PE=1 SV=1	387.921	360.676	368.768	362.647	403.82	382.823	368.34	371.808	349.539
G5E833	Oxysterol-binding protein OS=Mus musculus GN=Osbpl5 PE=1 SV=1	326.302	381.548	362.558	355.002	306.382	394.53	441.172	399.823	449.083
G5E843	Roundabout homolog 1 OS=Mus musculus GN=Robo1 PE=1 SV=1	292.27	363.088	379.765	411.106	319.54	420.214	415.104	371.43	459.021
G5E846	Peripherin OS=Mus musculus GN=Prph PE=1 SV=1	465.339	306.138	378.571	358.743	384.855	341.157	364.98	321.462	412.06
G5E852	Tyrosine-protein kinase OS=Mus musculus GN=Jak2 PE=1 SV=1	420.662	287.077	364.694	389.733	397.695	355.008	348.548	418.102	376.768
G5E866	Splicing factor 3B subunit 1 OS=Mus musculus GN=Sf3b1 PE=1 SV=1	386.689	391.423	381.161	373.242	385.094	357.867	356.121	366.709	356.572
G5E870	E3 ubiquitin-protein ligase TRIP12 OS=Mus musculus GN=Trip12 PE=1 SV=1	379.784	412.732	402.439	332.969	335.594	403.738	323.231	369.58	381.937
G5E881	Phosphatidate cytidylyltransferase, mitochondrial OS=Mus musculus GN=Tamm41 PE=1 SV=1	404.334	386.887	366.696	373.984	354.069	412.238	294.649	414.5	335.48
G5E884	Serine/threonine-protein kinase PAK 1 OS=Mus musculus GN=Pak1 PE=1 SV=1	380.969	365.091	399.194	370.398	373.999	369.112	372.067	353.875	374.387
G5E889	Mitochondrial translation optimization 1 homolog (S. cerevisiae), isoform CRA_b OS=Mus musculus GN=Mto1 PE=1 SV=1	405.765	385.174	350.961	371.556	378.596	340.095	429.316	344.198	366.343
G5E895	Aldo-keto reductase family 1, member B10 (aldose reductase) OS=Mus musculus GN=Akr1b10 PE=1 SV=1	427.584	387.929	379.162	299.681	420.564	368.559	337.97	359.401	330.033
G5E896	Enhancer of mRNA decapping 4, isoform CRA_b OS=Mus musculus GN=Edc4 PE=1 SV=1	381.581	398.641	354.718	396.579	347.038	387.455	361.34	373.288	375.869
G5E897	KDEL (Lys-Asp-Glu-Leu) containing 2, isoform CRA_b OS=Mus musculus GN=Kdelc2 PE=1 SV=1	423.996	373.416	389.288	353.275	393.047	347.397	349.07	384.764	315.48
G5E8A0	Oxysterol-binding protein OS=Mus musculus GN=Osbpl11 PE=1 SV=1	348.64	350.498	372.805	392.296	322.076	363.083	448.866	363.799	453.226
G5E8C6	Villin-like protein OS=Mus musculus GN=Vill PE=1 SV=1	440.957	381.277	309.81	358.547	395.394	348.607	313.031	444.014	351.167
G5E8D5	Metabotropic glutamate receptor 7 OS=Mus musculus GN=Grm7 PE=1 SV=1	382.3	365.904	373.531	360.797	384.671	390.871	368.95	372.339	360.621
G5E8E0	Regulator of G-protein signaling 17, isoform CRA_b OS=Mus musculus GN=Rgs17 PE=1 SV=1	372.321	361.651	351.971	363.169	390.637	354.474	459.658	329.513	408.243
G5E8F4	Fucose-1-phosphate guanylyltransferase OS=Mus musculus GN=Fpgt PE=1 SV=1	445.128	403.894	286.86	372.729	422.051	341.517	389.216	390.972	302.506
G5E8F8	Integrin beta OS=Mus musculus GN=Itgb5 PE=1 SV=1	317.272	318.84	313.665	426.701	305.426	336.114	462.329	383.58	609.902
G5E8G3	MCG9827 OS=Mus musculus GN=Opcml PE=1 SV=1	356.426	369.115	367.251	374.144	395.898	377.422	370.479	381.289	384.034
G5E8G5	Prominin 1, isoform CRA_a OS=Mus musculus GN=Prom1 PE=1 SV=1	270.188	424.577	369.806	346.003	302.461	412.278	458.158	420.58	429.498
G5E8H1	Glutamate receptor 2 OS=Mus musculus GN=Gria2 PE=1 SV=1	383.598	377.924	382.128	332.045	415.322	380.863	367.774	369.622	333.475
G5E8I8	Calcium homeostasis endoplasmic reticulum protein OS=Mus musculus GN=Cherp PE=1 SV=2	357.306	322.625	389.2	383.899	415.009	364.932	358.035	369.773	411.839
G5E8J3	Bromodomain and WD repeat domain containing 2, isoform CRA_a OS=Mus musculus GN=Wdr11 PE=1 SV=1	377.675	335.298	392.674	343.508	451.693	385.843	345.714	355.147	351.819
G5E8K5-2	Isoform 2 of Ankyrin-3 OS=Mus musculus GN=Ank3	360.764	381.796	372.965	385.301	364.296	392.255	376.85	384.968	358.665
G5E8N7	Bifunctional polynucleotide phosphatase/kinase OS=Mus musculus GN=Pnkp PE=1 SV=1	204.623	368.036	332.279	430.591	312.161	367.043	583.37	401.849	526.374
G5E8P2	Rho guanine nucleotide exchange factor 28 OS=Mus musculus GN=Arhgef28 PE=1 SV=1	255.206	375.604	326.372	416.471	318.012	395.396	480.87	396.927	515.923
G5E8R2	Tropomyosin 1, alpha, isoform CRA_k OS=Mus musculus GN=Tpm1 PE=1 SV=1	396.242	402.526	406.198	354.732	344.73	411.468	317.135	376.559	323.476
G5E8R4	SAPS domain family, member 3, isoform CRA_c OS=Mus musculus GN=Ppp6r3 PE=1 SV=1	423.061	354.132	368.487	366.928	431.134	337.883	353.903	347.997	354.676
G5E8R8	UBX domain-containing protein 7 OS=Mus musculus GN=Ubxn7 PE=1 SV=1	369.141	344.408	371.008	392.77	373.203	402.142	371.648	359.472	395.508
G5E8S8	MAGUK p55 subfamily member 7 OS=Mus musculus GN=Mpp7 PE=1 SV=1	467.661	359.099	382.899	325.654	423.13	335.239	292.786	371.517	336.969
G5E8T2	E3 ubiquitin-protein ligase TTC3 OS=Mus musculus GN=Ttc3 PE=1 SV=1	415.271	386.73	404.048	381.033	356.477	363.514	306.302	372.986	346.524
G5E8T6	Membrane associated guanylate kinase, WW and PDZ domain containing 3, isoform CRA_a OS=Mus musculus GN=Magi3 PE=1 SV=1	362.292	356.736	366.288	389.655	368.153	375.008	401.967	382.678	386.529
G5E8T9	Hydroxyacyl glutathione hydrolase OS=Mus musculus GN=Hagh PE=1 SV=1	393.275	335.948	404.681	344.038	432.133	359.7	334.08	333.932	396.422
G5E8V9	ADP-ribosylation factor-interacting protein 1 OS=Mus musculus GN=Arfip1 PE=1 SV=1	386.408	382.476	384.131	350.545	357.448	383.117	367.109	392.228	352.088
G5E902	MCG10343, isoform CRA_b OS=Mus musculus GN=Slc25a3 PE=1 SV=1	362.993	391.272	373.965	357.513	371.511	390.78	356.867	386.665	374.202
G5E911	DNA segment, Chr 6, Wayne State University 176, expressed, isoform CRA_f OS=Mus musculus GN=Fam3c PE=1 SV=1	375.982	344.53	384.319	403.362	396.924	409.095	328.168	369.213	347.86
G5E924	Heterogeneous nuclear ribonucleoprotein L (Fragment) OS=Mus musculus GN=Hnrnpl PE=1 SV=1	425.678	348.415	382.789	376.448	388.426	342.373	342.519	365.971	368.844
G8JL73	Transmembrane and ubiquitin-like domain-containing protein 2 (Fragment) OS=Mus musculus GN=Tmub2 PE=1 SV=1	396.448	418.618	336.663	450.598	329.483	360.913	338.275	407.83	345.213
H3BIV5	A-kinase anchor protein 5 OS=Mus musculus GN=Akap5 PE=1 SV=1	343.728	402.243	464.497	361.515	307.159	458.366	261.424	387.015	348.616
H3BIV6	Cysteine and histidine-rich protein 1 OS=Mus musculus GN=Cyhr1 PE=1 SV=1	298.045	417.022	308.58	406.269	376.976	398.672	464.676	370.7	399.911
H3BJD6	Protein phosphatase 1, regulatory (inhibitor) subunit 9A OS=Mus musculus GN=Ppp1r9a PE=1 SV=1	355.107	385.411	430.813	351.729	362.699	410.942	338.698	376.92	333.4
H3BJQ8	Glypican-5 OS=Mus musculus GN=Gpc5 PE=1 SV=1	386.158	384.242	417.107	399.229	323.536	367.605	320.49	405.293	350.491
H3BJQ9	Homeobox protein cut-like OS=Mus musculus GN=Cux1 PE=1 SV=1	414.746	391.84	388.039	383.611	349.26	316.971	337.323	387.909	379.923
H3BJW3	Cleavage and polyadenylation-specificity factor subunit 6 OS=Mus musculus GN=Cpsf6 PE=1 SV=1	365.148	326.238	355.483	412.991	410.957	335.809	421.864	345.925	425.501
H3BJZ7	Protein unc-13 homolog A OS=Mus musculus GN=Unc13a PE=1 SV=1	366.095	377.117	394.963	357.451	365.176	386.195	365.147	381.621	368.182
H3BKH6	S-formylglutathione hydrolase OS=Mus musculus GN=Esd PE=1 SV=1	358.712	372.707	371.738	365.181	383.589	387.506	398.121	373.602	365.676
H3BKQ3	Ecotropic viral integration site 5-like OS=Mus musculus GN=Evi5l PE=1 SV=1	317.522	370.27	338.89	416.398	360.912	416.709	403.439	407.45	389.187
H3BKU0	Dysbindin domain-containing protein 1 OS=Mus musculus GN=Dbndd1 PE=1 SV=1	445.728	321.347	273.522	416.986	454.715	318.215	400.305	459.414	283.972
H3BL37	Treacle protein OS=Mus musculus GN=Tcof1 PE=1 SV=1	349.899	331.005	413.148	398.444	378.898	360.16	341.462	351.174	452.209
H3BLD9	Zinc finger protein 428 OS=Mus musculus GN=Zfp428 PE=1 SV=1	329.633	341.661	375.38	404.125	300.733	375.207	452.893	397.681	452.888
H3BLG3	Ras-related protein Rab-26 OS=Mus musculus GN=Rab26 PE=1 SV=1	405.157	342.859	402.802	338.58	412.354	360.477	386.527	345.711	343.224
H3BLH0	Probable global transcription activator SNF2L2 OS=Mus musculus GN=Smarca2 PE=1 SV=1	392.586	379.058	320.353	371.723	433.772	376.654	365.064	386.852	337.079
H3BLL2	ATP synthase mitochondrial F1 complex assembly factor 1 OS=Mus musculus GN=Atpaf1 PE=1 SV=1	435.62	422.501	328.798	308.554	426.597	396.353	373.919	375.974	252.311
H7BWY8	Pre-rRNA-processing protein TSR2 homolog OS=Mus musculus GN=Tsr2 PE=1 SV=1	382.741	365.611	342.016	370.815	414.522	443.614	302.793	377.405	351.491
H7BWZ2	Adhesion G protein-coupled receptor B2 OS=Mus musculus GN=Adgrb2 PE=1 SV=1	359.917	422.213	436.993	337.322	357.87	390.772	339.832	358.683	333.142
H7BWZ9	Protein dopey-1 OS=Mus musculus GN=Dopey1 PE=1 SV=1	268.247	395.21	319.729	341.681	306.949	380.006	585.622	393.252	488.55
H7BX08	Calmodulin-regulated spectrin-associated protein 2 OS=Mus musculus GN=Camsap2 PE=1 SV=1	387.514	363.523	408.723	389.108	373.811	401.323	308.711	361.764	348.365
H7BX59	tRNA pseudouridine synthase OS=Mus musculus GN=Pus1 PE=1 SV=1	314.924	351.092	330.153	348.114	370.279	458.875	341.145	459.187	425.568
H7BX69	Zinc finger and BTB domain-containing protein 18 OS=Mus musculus GN=Zbtb18 PE=1 SV=1	302.035	387.347	345.491	430.016	279.308	351.808	470.234	387.999	509.02
H7BX95	Serine/arginine-rich-splicing factor 1 OS=Mus musculus GN=Srsf1 PE=1 SV=1	379.84	385.02	359.103	386.703	356.903	377.984	372.919	378.947	378.976
H9H9T1	Protein FAM107B OS=Mus musculus GN=Fam107b PE=1 SV=1	409.917	304.795	238.017	437.096	448.671	292.288	474.062	303.76	526.412
H9KV00	Protein SON OS=Mus musculus GN=Son PE=1 SV=1	396.357	399.136	422.591	373.779	371.647	371.037	317.66	362.744	314.502
H9KV04	Mini-chromosome maintenance complex-binding protein OS=Mus musculus GN=Mcmbp PE=1 SV=1	381.307	397.624	406.916	375.311	306.203	353.11	387.564	379.383	383.018
I1E4X1	Syntaxin 5A OS=Mus musculus GN=Stx5a PE=1 SV=1	318.539	317.483	426.111	447.301	315.527	355.545	417.072	381.421	443.557
I1E4X5	RIKEN cDNA 9030624J02 gene OS=Mus musculus GN=9030624J02Rik PE=1 SV=1	298.876	358.449	353.892	408.782	317.575	403.626	444.458	412.147	445.011
I1E4X8	Stromal interaction molecule 2 OS=Mus musculus GN=Stim2 PE=1 SV=1	370.904	270.794	443.796	386.744	413.599	393.881	306.578	303.103	458.107
I3ITR1	CDNA sequence AK157302 OS=Mus musculus GN=AK157302 PE=4 SV=1	293.73	429.771	365.424	418.674	342.141	417.232	381.1	409.229	357.02
I7HJQ9	Myotubularin-related protein 1 OS=Mus musculus GN=Mtmr1 PE=1 SV=1	394.189	363.625	410.25	350.568	374.992	395.153	343.146	379.88	324.61
I7HPW4	G protein-coupled receptor, family C, group 5, member C OS=Mus musculus GN=Gprc5c PE=1 SV=1	515.23	346.935	413.785	261.04	442.383	269.297	376.147	269.023	375.388
J3KMH5	Melanoma inhibitory activity protein 3 OS=Mus musculus GN=Mia3 PE=1 SV=1	371.792	401.677	368.986	374.446	369.831	377.588	354.823	377.905	369.285
J3KMP6	Family with sequence similarity 92, member A OS=Mus musculus GN=Fam92a PE=1 SV=1	533.136	279.659	420.44	377.036	451.628	315.364	321.938	311.74	260.251
J3KMQ6	RIKEN cDNA 5730455P16 gene OS=Mus musculus GN=5730455P16Rik PE=1 SV=1	386.422	408.053	346.819	343.28	368.334	345.841	406.371	396.148	369.833
J3QK20	Voltage-dependent L-type calcium channel subunit beta-4 OS=Mus musculus GN=Cacnb4 PE=1 SV=1	358.816	396.048	359.561	392.558	359.673	388.72	371.666	395.105	360.998
J3QMI4	Calcium homeostasis modulator 3 OS=Mus musculus GN=Calhm3 PE=4 SV=1	395.337	368.773	429.646	367.061	310.797	396.797	328.733	347.4	401.028
J3QMP9	Centrosomal protein of 131 kDa OS=Mus musculus GN=Cep131 PE=1 SV=1	358.268	245.267	396.355	397.172	457.387	311.509	348.871	311	557.141
J3QN85	Fibroblast growth factor receptor OS=Mus musculus GN=Fgfr1 PE=1 SV=1	339.382	371.038	354.451	380.027	385.266	358.648	373.073	387.975	445.525
J3QN89	Angio-associated migratory protein OS=Mus musculus GN=Aamp PE=1 SV=1	368.863	319.298	402.101	419.046	373.699	360.744	394.303	361.064	384.8
J3QN94	Tripartite motif-containing protein 26 OS=Mus musculus GN=Trim26 PE=1 SV=1	356.035	350.711	350.093	319.804	385.879	344.773	497.848	391.605	402.917
J3QNE8	Putative sodium-coupled neutral amino acid transporter 10 OS=Mus musculus GN=Slc38a10 PE=1 SV=1	297.045	357.231	355.145	439.657	376.86	397.835	344.755	392.001	462.183
J3QNK5	Histone deacetylase complex subunit SAP130 OS=Mus musculus GN=Sap130 PE=1 SV=1	368.273	351.273	379.603	386.248	372.442	360.632	378.406	393.411	388.221
J3QNK8	Abl interactor 1 OS=Mus musculus GN=Abi1 PE=1 SV=1	321.535	359.035	380.71	395.64	377.886	396.876	407.04	384.58	377.584
J3QNT7	Epsin-2 OS=Mus musculus GN=Epn2 PE=1 SV=1	376.664	375.718	365.103	389.376	338.607	380.323	393.008	370.297	395.984
J3QNU6	Beta-arrestin-1 OS=Mus musculus GN=Arrb1 PE=1 SV=1	398.157	374.05	390.791	355.978	380.518	380.488	325.449	379.829	353.837
J3QNW4	Trafficking protein particle complex subunit 13 OS=Mus musculus GN=Trappc13 PE=1 SV=1	288.45	390.946	388.214	413.438	274.858	408.397	461.088	391.194	426.607
J3QNX5	Cysteine-knot AMPAR-modulating protein 39 OS=Mus musculus GN=Shisa8 PE=1 SV=1	353.568	402.778	321.728	487.375	334.989	381.01	393.918	379.959	370.434
J3QP43	Protein stum homolog OS=Mus musculus GN=Stum PE=1 SV=1	252.24	373.447	327.408	397.081	318.927	348.786	602.702	373.991	507.01
J3QPC3	CDNA sequence BC024978 OS=Mus musculus GN=BC024978 PE=1 SV=1	323.841	405.09	374.322	376.701	339.749	353.12	427.166	339.172	471.523
J3QPG5	Prosaposin OS=Mus musculus GN=Psap PE=1 SV=1	368.554	345.484	429.073	339.866	400.468	349.731	397.207	374.675	345.281
J3QPR1	Ataxin-1 OS=Mus musculus GN=Atxn1 PE=1 SV=1	291.671	392.12	322.91	416.62	332.92	421.402	454.759	368.799	450.382
J3QQ10	Uncharacterized protein OS=Mus musculus GN=Gm7102 PE=4 SV=1	201.053	456.161	297.239	540.526	213.078	455.884	392.234	395.565	581.842
J3QQ18	Ras/Rap GTPase-activating protein SynGAP OS=Mus musculus GN=Syngap1 PE=1 SV=1	347.816	354.513	384.706	377.224	386.911	379.617	376.159	377.976	394.75
K3W4M4	ATP-dependent (S)-NAD(P)H-hydrate dehydratase OS=Mus musculus GN=Naxd PE=1 SV=1	405.678	385.492	369.826	369.107	365.613	369.06	361.888	376.542	350.288
K3W4P1	Next to BRCA1 gene 1 protein OS=Mus musculus GN=Nbr1 PE=1 SV=1	318.476	381.802	355.598	408.991	341.887	344.565	447.176	388.965	443.239
K3W4Q9	Golgi-associated PDZ and coiled-coil motif-containing protein OS=Mus musculus GN=Gopc PE=1 SV=1	395.968	377.719	400.152	338.726	387.348	382.818	330.582	362.716	356.65
K3W4R3	Dysbindin OS=Mus musculus GN=Dtnbp1 PE=1 SV=1	400.45	409.369	349.147	373.723	365.778	381.37	385.816	344.103	354.296
K3W4R5	Cytoskeleton-associated protein 5 OS=Mus musculus GN=Ckap5 PE=1 SV=1	419.427	384.388	370.075	353.813	400.193	366.715	341.147	366.586	331.159
K3W4S4	C-Jun-amino-terminal kinase-interacting protein 3 OS=Mus musculus GN=Mapk8ip3 PE=1 SV=1	392.334	375.892	407.395	380.114	398.522	386.221	306.636	360.053	325.596
K3W4S6	Glycogenin OS=Mus musculus GN=Gyg PE=1 SV=1	379.858	417.429	357.792	359.715	372.231	397.211	358.055	389.834	326.002
K3W4T3	V-type proton ATPase subunit a OS=Mus musculus GN=Atp6v0a1 PE=1 SV=1	368.655	380.728	378.618	366.964	387.237	384.758	371.029	374.331	351.455
K4DI58	Cell adhesion molecule 3 OS=Mus musculus GN=Cadm3 PE=1 SV=1	325.707	374.543	387.088	388.087	341.094	389.033	401.706	396.606	397.151
K4DI59	DNA ligase OS=Mus musculus GN=Lig3 PE=1 SV=1	489.693	340.009	399.127	279.894	410.232	337.65	318.459	349.405	355.94
K4DI62	Transcription factor Sp4 OS=Mus musculus GN=Sp4 PE=1 SV=1	385.19	406.098	241.441	472.907	381.003	329.899	515.371	373.325	343.36
K4DI77	WD repeat-containing protein 81 (Fragment) OS=Mus musculus GN=Wdr81 PE=1 SV=1	358.934	412.729	417.744	297.974	327.436	382.03	301.734	417.904	423.952
L7N466	5-formyltetrahydrofolate cyclo-ligase OS=Mus musculus GN=Mthfsl PE=1 SV=1	401.149	375.231	365.452	386.299	353.712	398.32	368.519	373.677	340.204
M0QWJ9	Transmembrane protein 178B OS=Mus musculus GN=Tmem178b PE=1 SV=1	332.347	363.287	363.855	446.013	267.774	401.714	490.099	348.386	435.234
M0QWN7	Ubiquitin-specific peptidase 35 OS=Mus musculus GN=Usp35 PE=1 SV=1	467.313	399.671	442.352	241.185	415.514	435.22	242.617	315.72	277.442
M0QWP1	Agrin OS=Mus musculus GN=Agrn PE=1 SV=1	363.85	364.262	368.983	408.539	336.14	384.36	377.34	381.237	408.183
O08529	Calpain-2 catalytic subunit OS=Mus musculus GN=Capn2 PE=1 SV=4	409.781	368.803	364.678	352.267	396.945	338.805	404.426	367.081	352.698
O08530	Sphingosine 1-phosphate receptor 1 OS=Mus musculus GN=S1pr1 PE=1 SV=3	375.131	412.837	415.475	361.499	309.568	366.959	342.165	399.867	372.37
O08532-5	Isoform 2E of Voltage-dependent calcium channel subunit alpha-2/delta-1 OS=Mus musculus GN=Cacna2d1	378.447	386.786	403.525	350.178	387.453	386.469	348.907	384.424	315.355
O08539	Myc box-dependent-interacting protein 1 OS=Mus musculus GN=Bin1 PE=1 SV=1	349.651	346.889	365.621	386.181	398.136	385.013	362.622	360.505	430.033
O08545	Ephrin-A3 OS=Mus musculus GN=Efna3 PE=1 SV=4	400.591	418.698	502.482	374.585	309.107	297.316	378.605	298.86	348.399
O08547	Vesicle-trafficking protein SEC22b OS=Mus musculus GN=Sec22b PE=1 SV=3	384.707	313.148	332.718	372.967	479.929	393.399	341.972	373.792	365.767
O08553	Dihydropyrimidinase-related protein 2 OS=Mus musculus GN=Dpysl2 PE=1 SV=2	352.17	394.237	349.663	411.433	365.332	373.242	408.938	371.497	373.914
O08576	RUN domain-containing protein 3A OS=Mus musculus GN=Rundc3a PE=1 SV=1	326.355	415.213	371.347	372.733	377.131	399.901	387.225	422.666	311.095
O08579	Emerin OS=Mus musculus GN=Emd PE=1 SV=1	364.533	362.178	351.758	428.765	420.523	367.675	357.282	383.549	345.131
O08582	GTP-binding protein 1 OS=Mus musculus GN=Gtpbp1 PE=1 SV=2	372.619	387.999	375.94	377.086	347.551	371.699	390.131	379.044	374.731
O08583	THO complex subunit 4 OS=Mus musculus GN=Alyref PE=1 SV=3	378.738	395.303	367.722	401.911	392.022	393.276	310.631	387.65	327.982
O08586	Phosphatidylinositol 3,4,5-trisphosphate 3-phosphatase and dual-specificity protein phosphatase PTEN OS=Mus musculus GN=Pten PE=1 SV=1	406.835	393.746	362.541	332.373	399.461	358.196	398.81	361.781	332.994
O08599	Syntaxin-binding protein 1 OS=Mus musculus GN=Stxbp1 PE=1 SV=2	358.395	378.912	358.321	377.061	383.28	387.663	392.17	386.499	359.395
O08599-2	Isoform 2 of Syntaxin-binding protein 1 OS=Mus musculus GN=Stxbp1	358.099	378.816	357.803	377.155	383.898	387.737	392.756	386.182	359.567
O08600	Endonuclease G, mitochondrial OS=Mus musculus GN=Endog PE=1 SV=1	400.37	394.758	329.627	414.878	352.879	355.242	390.016	363.615	385.559
O08601-2	Isoform 2 of Microsomal triglyceride transfer protein large subunit OS=Mus musculus GN=Mttp	368.1	412.844	324.121	404.941	233.853	398.713	424.545	405.217	455.085
O08644	Ephrin type-B receptor 6 OS=Mus musculus GN=Ephb6 PE=2 SV=4	335.42	371.06	391.196	402.683	364.538	387.478	366.44	379.118	390.191
O08648	Mitogen-activated protein kinase kinase kinase 4 OS=Mus musculus GN=Map3k4 PE=1 SV=2	359.193	365.743	380.826	400.671	323.294	399.152	359.308	408.886	389.672
O08688	Calpain-5 OS=Mus musculus GN=Capn5 PE=1 SV=1	381.299	345.963	390.796	342.467	382.207	385.783	374.473	363.9	389.759
O08692	Neutrophilic granule protein OS=Mus musculus GN=Ngp PE=1 SV=1	504.265	277.677	314.189	628.535	283.235	351.812	333.4	302.383	412.924
O08715-4	Isoform 4 of A-kinase anchor protein 1, mitochondrial OS=Mus musculus GN=Akap1	332.472	372.322	394.594	368.885	360.774	402.851	355.709	396.635	395.032
O08747-2	Isoform 2 of Netrin receptor UNC5C OS=Mus musculus GN=Unc5c	375.945	375.968	410.327	345.722	341.599	390.964	336.069	398.101	375.061
O08749	Dihydrolipoyl dehydrogenase, mitochondrial OS=Mus musculus GN=Dld PE=1 SV=2	444.638	334.001	343.811	385.386	399.598	363.55	351.308	357.835	366.872
O08759	Ubiquitin-protein ligase E3A OS=Mus musculus GN=Ube3a PE=1 SV=2	410.541	334.144	376.101	358.563	413.814	368.06	375.368	349.836	360.716
O08788	Dynactin subunit 1 OS=Mus musculus GN=Dctn1 PE=1 SV=3	379.497	352.344	397.942	355.803	409.494	378.418	353.514	355.057	365.711
O08795-2	Isoform 2 of Glucosidase 2 subunit beta OS=Mus musculus GN=Prkcsh	352.609	389.814	368.318	431.243	361.737	373.787	357.81	390.469	364.408
O08797	Putative uncharacterized protein OS=Mus musculus GN=Serpinb9 PE=1 SV=1	417.807	392.146	343.891	343.538	402.433	347.506	426.738	363.523	316.956
O08800	Serpin B8 OS=Mus musculus GN=Serpinb8 PE=1 SV=2	404.999	378.871	397.208	312.757	362.045	393.142	367.356	359.141	359.1
O08807	Peroxiredoxin-4 OS=Mus musculus GN=Prdx4 PE=1 SV=1	428.933	355.409	376.115	280.684	455.944	384.424	348.535	371.783	302.161
O08842	GDNF family receptor alpha-2 OS=Mus musculus GN=Gfra2 PE=1 SV=2	342.088	389.979	429.976	414.249	393.627	377.671	311.373	376.133	320.126
O08848	60 kDa SS-A/Ro ribonucleoprotein OS=Mus musculus GN=Trove2 PE=1 SV=1	474.682	366.028	366.195	369.5	381.807	300.896	383.228	355.85	332.64
O08908	Phosphatidylinositol 3-kinase regulatory subunit beta OS=Mus musculus GN=Pik3r2 PE=1 SV=2	415.074	373.141	319.266	362.679	460.537	371.595	336.563	403.016	299.056
O08914	Fatty-acid amide hydrolase 1 OS=Mus musculus GN=Faah PE=1 SV=1	328.654	382.517	355.914	389.408	372.84	392.815	414.988	426.493	338.663
O08915	AH receptor-interacting protein OS=Mus musculus GN=Aip PE=1 SV=1	395.482	384.152	361.26	361.383	429.229	360.439	355.065	379.822	318.499
O08917	Flotillin-1 OS=Mus musculus GN=Flot1 PE=1 SV=1	347.627	359.28	348.947	391.038	373.044	402.777	412.372	402.18	361.9
O08919	Numb-like protein OS=Mus musculus GN=Numbl PE=1 SV=3	354.818	348.926	362.386	354.118	385.124	394.07	414.245	386.712	384.655
O08967	Cytohesin-3 OS=Mus musculus GN=Cyth3 PE=1 SV=1	360.209	357.578	360.86	396.848	374.51	327.495	440.18	380.406	404.76
O08989	Ras-related protein M-Ras OS=Mus musculus GN=Mras PE=1 SV=1	432.83	356.063	449.642	302.218	397.06	334.695	329.807	342.48	351.776
O08992	Syntenin-1 OS=Mus musculus GN=Sdcbp PE=1 SV=1	312.777	366.352	317.224	407.084	345.659	407.765	555.514	402.928	340.385
O08997	Copper transport protein ATOX1 OS=Mus musculus GN=Atox1 PE=1 SV=1	373.189	345.708	311.175	407.131	363.983	435.415	425.46	383.556	360.938
O09005	Sphingolipid delta(4)-desaturase DES1 OS=Mus musculus GN=Degs1 PE=1 SV=1	298.799	404.264	379.525	370.598	312.637	378.696	467.769	374.916	440.58
O09012-2	Isoform 2 of Peroxisomal targeting signal 1 receptor OS=Mus musculus GN=Pex5	326.327	371.677	381.888	372.516	369.132	416.183	359.417	390.143	397.944
O09061	Proteasome subunit beta type-1 OS=Mus musculus GN=Psmb1 PE=1 SV=1	395.586	374.777	338.548	435.971	344.295	363.597	397.434	344.226	401.584
O09106	Histone deacetylase 1 OS=Mus musculus GN=Hdac1 PE=1 SV=1	159.609	392.399	351.392	460.535	228.194	511.05	434.975	391.765	597.347
O09110	Dual specificity mitogen-activated protein kinase kinase 3 OS=Mus musculus GN=Map2k3 PE=1 SV=2	394.183	299.449	378.956	342.291	453.894	354.798	389.359	343.704	395.108
O09111	NADH dehydrogenase [ubiquinone] 1 beta subcomplex subunit 11, mitochondrial OS=Mus musculus GN=Ndufb11 PE=1 SV=2	411.887	371.317	387.671	375.271	346.092	351.683	368.82	329.113	415.295
O09114	Prostaglandin-H2 D-isomerase OS=Mus musculus GN=Ptgds PE=1 SV=1	375.705	364.089	412.478	319.761	360.158	328.061	432.664	343.736	428.652
O09117	Synaptophysin-like protein 1 OS=Mus musculus GN=Sypl1 PE=1 SV=2	495.005	371.053	392.526	330.676	485.029	335.152	234.539	340.132	270.45
O09126	Semaphorin-4D OS=Mus musculus GN=Sema4d PE=1 SV=2	375.073	381.884	402.904	328.478	384.146	358.594	362.428	369.663	384.365
O09131	Glutathione S-transferase omega-1 OS=Mus musculus GN=Gsto1 PE=1 SV=2	403.065	373.614	372.876	351.722	426.682	375.168	331.401	369.387	329.524
O09159	Lysosomal alpha-mannosidase OS=Mus musculus GN=Man2b1 PE=1 SV=4	347.187	358.907	383.439	352.609	370.758	382.454	403.616	384.025	399.564
O09164	Extracellular superoxide dismutase [Cu-Zn] OS=Mus musculus GN=Sod3 PE=1 SV=1	267.817	356.034	333.632	486.71	308.419	365.926	436.011	404.986	526.65
O09167	60S ribosomal protein L21 OS=Mus musculus GN=Rpl21 PE=1 SV=3	391.08	382.385	386.333	363.581	430.007	384.982	309.813	380.696	300.557
O09172	Glutamate--cysteine ligase regulatory subunit OS=Mus musculus GN=Gclm PE=1 SV=1	415.388	402.876	419.235	358.088	369.71	337.143	347.418	377.214	298.323
O09174	Alpha-methylacyl-CoA racemase OS=Mus musculus GN=Amacr PE=1 SV=4	320.104	400.784	347.844	415.171	298.272	405.317	396.883	408.224	433.785
O35066	Kinesin-like protein KIF3C OS=Mus musculus GN=Kif3c PE=1 SV=3	351.687	349.071	381.012	388.26	387.678	355.039	411.226	336.196	431.241
O35075	Down syndrome critical region protein 3 homolog OS=Mus musculus GN=Dscr3 PE=1 SV=1	305.942	405.448	478.83	379.633	283.585	379.615	343.044	391.733	408.974
O35098	Dihydropyrimidinase-related protein 4 OS=Mus musculus GN=Dpysl4 PE=1 SV=1	360.043	377.648	362.809	410.779	344.378	370.066	397.167	391.169	383.004
O35099	Mitogen-activated protein kinase kinase kinase 5 OS=Mus musculus GN=Map3k5 PE=1 SV=3	364.046	370.728	358.359	374.109	348.423	407.239	394.747	392.168	376.15
O35114	Lysosome membrane protein 2 OS=Mus musculus GN=Scarb2 PE=1 SV=3	363.604	362.785	385.753	328.934	401.39	346.057	414.815	365.58	398.93
O35127	Protein C10 OS=Mus musculus GN=Grcc10 PE=1 SV=1	415.701	332.739	435.665	338.074	383.835	378.149	342.846	326.105	368.272
O35129	Prohibitin-2 OS=Mus musculus GN=Phb2 PE=1 SV=1	389.038	372.23	357.421	383.016	384.812	370.023	363.152	354.215	394.089
O35136	Neural cell adhesion molecule 2 OS=Mus musculus GN=Ncam2 PE=1 SV=1	403.347	366.464	392.152	364.64	380.784	383.62	346.098	376.143	327.827
O35143	ATPase inhibitor, mitochondrial OS=Mus musculus GN=Atpif1 PE=1 SV=2	327.317	266.865	384.046	387.67	370.995	376.882	303.606	319.905	668.131
O35144	Telomeric repeat-binding factor 2 OS=Mus musculus GN=Terf2 PE=1 SV=3	351.042	399.82	350.699	386.519	364.547	353.544	381.8	395.149	410.226
O35161	Cadherin EGF LAG seven-pass G-type receptor 1 OS=Mus musculus GN=Celsr1 PE=1 SV=3	321.271	365.788	339.144	351.947	370.104	357.879	476.721	428.372	411.003
O35166	Golgi SNAP receptor complex member 2 OS=Mus musculus GN=Gosr2 PE=1 SV=2	378.697	323.468	392.985	375.269	398.897	347.429	366.454	359.96	423.062
O35181	Pro-neuregulin-3, membrane-bound isoform OS=Mus musculus GN=Nrg3 PE=1 SV=1	450.203	322.77	361.889	333.867	354.725	372.483	363.352	377.416	404.401
O35188	Fractalkine OS=Mus musculus GN=Cx3cl1 PE=1 SV=3	293.536	394.568	312.463	360.519	435.393	347.373	373.299	424.284	473.762
O35206	Collagen alpha-1(XV) chain OS=Mus musculus GN=Col15a1 PE=1 SV=2	378.822	281.753	415.167	347.552	424.403	320.959	358.122	349.067	480.829
O35215	D-dopachrome decarboxylase OS=Mus musculus GN=Ddt PE=1 SV=3	442.162	376.777	351.446	288.517	420.718	406.728	309.545	363.092	346.626
O35216	Histone H3-like centromeric protein A OS=Mus musculus GN=Cenpa PE=2 SV=1	81.3088	281.312	221.748	779.899	244.77	197.436	704.64	450.537	794.935
O35218	Cleavage and polyadenylation specificity factor subunit 2 OS=Mus musculus GN=Cpsf2 PE=1 SV=1	350.986	385.534	423.422	451.019	323.211	332.695	348.158	373.599	399.192
O35219	Potassium voltage-gated channel subfamily H member 2 OS=Mus musculus GN=Kcnh2 PE=1 SV=2	337.824	403.403	363.437	351.105	359.953	363.64	406.785	416.866	387.786
O35226	26S proteasome non-ATPase regulatory subunit 4 OS=Mus musculus GN=Psmd4 PE=1 SV=1	405.249	386.505	358.768	393.154	360.166	399.1	341.634	382.981	328.962
O35226-2	Isoform Rpn10B of 26S proteasome non-ATPase regulatory subunit 4 OS=Mus musculus GN=Psmd4	402.708	390.144	360.725	388.14	360.282	399.761	338.439	383.178	331.696
O35239	Tyrosine-protein phosphatase non-receptor type 9 OS=Mus musculus GN=Ptpn9 PE=1 SV=2	339.561	367.607	401.959	368.869	353.521	392.357	395.281	392.635	370.214
O35250	Exocyst complex component 7 OS=Mus musculus GN=Exoc7 PE=1 SV=2	401.484	370.235	396.843	350.793	386.235	346.509	370.511	358.515	363.412
O35261	Transcription factor E2F3 OS=Mus musculus GN=E2f3 PE=1 SV=2	368.791	423.34	389.382	354.781	308.703	396.87	387.183	403.883	335.619
O35286	Pre-mRNA-splicing factor ATP-dependent RNA helicase DHX15 OS=Mus musculus GN=Dhx15 PE=1 SV=2	408.165	357.687	366.175	362.398	392.621	352.648	358.767	371.002	383.129
O35295	Transcriptional activator protein Pur-beta OS=Mus musculus GN=Purb PE=1 SV=3	338.462	370.295	384.826	398.013	404.013	347.526	394.034	369.678	380.739
O35316	Sodium- and chloride-dependent taurine transporter OS=Mus musculus GN=Slc6a6 PE=1 SV=2	317.434	281.366	345.417	452.114	469.555	319.983	347.103	318.393	570.609
O35344	Importin subunit alpha-4 OS=Mus musculus GN=Kpna3 PE=1 SV=1	453.306	377.565	341.939	304.714	454.286	339.429	386.555	351.13	307.714
O35345	Importin subunit alpha-7 OS=Mus musculus GN=Kpna6 PE=1 SV=2	424.379	378.956	382.335	337.058	386.023	366.22	335.652	376.893	339.16
O35350	Calpain-1 catalytic subunit OS=Mus musculus GN=Capn1 PE=1 SV=1	373.479	392.361	396.884	376.216	376.581	361.527	345.349	372.673	360.817
O35375	Neuropilin-2 OS=Mus musculus GN=Nrp2 PE=1 SV=2	355.93	355.271	432.111	368.929	411.386	390.145	408.375	341.26	290.937
O35379	Multidrug resistance-associated protein 1 OS=Mus musculus GN=Abcc1 PE=1 SV=1	384.32	357.058	360.958	357.757	357.129	356.576	444.995	380.34	386.206
O35381	Acidic leucine-rich nuclear phosphoprotein 32 family member A OS=Mus musculus GN=Anp32a PE=1 SV=1	390.379	428.611	358.357	391.828	367.852	396.462	324.312	371.249	324.502
O35382	Exocyst complex component 4 OS=Mus musculus GN=Exoc4 PE=1 SV=2	408.477	367.096	390.887	266.487	463.024	372.188	332.905	359.668	342.044
O35386	Phytanoyl-CoA dioxygenase, peroxisomal OS=Mus musculus GN=Phyh PE=1 SV=1	452.536	368.23	377.126	358.563	358.951	306.495	342.048	381.811	388.346
O35387	HCLS1-associated protein X-1 OS=Mus musculus GN=Hax1 PE=1 SV=1	435.047	296.163	354.697	420.779	389.622	430.464	320.528	388.621	313.014
O35393	Ephrin-B3 OS=Mus musculus GN=Efnb3 PE=1 SV=1	322.845	352.727	400.069	409.849	327.516	371.35	393.09	383.067	449.45
O35405	Phospholipase D3 OS=Mus musculus GN=Pld3 PE=1 SV=1	332.904	415.233	345.987	378.407	375.591	422.691	395.403	374.029	351.98
O35409	Glutamate carboxypeptidase 2 OS=Mus musculus GN=Folh1 PE=1 SV=2	459.462	364.996	339.571	366.246	381.307	346.803	372.364	351.224	360.05
O35435	Dihydroorotate dehydrogenase (quinone), mitochondrial OS=Mus musculus GN=Dhodh PE=1 SV=2	400.164	377.138	362.652	356.12	354.02	369.603	358.058	405.231	376.278
O35449	Proline-rich transmembrane protein 1 OS=Mus musculus GN=Prrt1 PE=1 SV=1	325.392	332.026	482.432	370.212	322.195	388.762	375.414	375.233	399.393
O35450	FK506-binding protein-like OS=Mus musculus GN=Fkbpl PE=2 SV=1	277.616	372.993	360.134	410.959	321.352	447.428	382.454	441.202	419.224
O35459	Delta(3,5)-Delta(2,4)-dienoyl-CoA isomerase, mitochondrial OS=Mus musculus GN=Ech1 PE=1 SV=1	392.963	365.748	372.787	348.744	362.907	367.929	395.664	363.769	394.371
O35465	Peptidyl-prolyl cis-trans isomerase FKBP8 OS=Mus musculus GN=Fkbp8 PE=1 SV=2	386.504	359.014	399.178	395.53	381.439	352.809	391.127	347.739	351.065
O35465-2	Isoform 2 of Peptidyl-prolyl cis-trans isomerase FKBP8 OS=Mus musculus GN=Fkbp8	386.729	362.439	398.347	394.841	377.842	352.196	394.357	349.215	349.239
O35474	EGF-like repeat and discoidin I-like domain-containing protein 3 OS=Mus musculus GN=Edil3 PE=1 SV=2	305.273	393.834	428.116	343.822	353.736	404.506	373.23	385.073	389.259
O35488	Very long-chain acyl-CoA synthetase OS=Mus musculus GN=Slc27a2 PE=1 SV=2	349.454	393.187	342.82	373.094	335.7	341.229	377.146	388.555	503.337
O35495	Cyclin-dependent kinase 14 OS=Mus musculus GN=Cdk14 PE=1 SV=2	387.77	386.67	397.533	342.234	414.298	387.234	314.912	373.014	323.521
O35526	Syntaxin-1A OS=Mus musculus GN=Stx1a PE=1 SV=3	376.486	328.907	390.332	356.637	430.527	391.172	310.719	358.716	400.524
O35544	Excitatory amino acid transporter 4 OS=Mus musculus GN=Slc1a6 PE=1 SV=1	490.278	435.7	303.519	339.003	410.947	283.121	370.462	353.733	336.469
O35551-6	Isoform 6 of Rab GTPase-binding effector protein 1 OS=Mus musculus GN=Rabep1	349.346	377.287	381.631	353.183	353.878	385.222	413.107	357.211	414.6
O35593	26S proteasome non-ATPase regulatory subunit 14 OS=Mus musculus GN=Psmd14 PE=1 SV=2	356.504	398.6	376.922	362.594	377.671	401.98	356.883	383.698	349.953
O35594	Intraflagellar transport protein 81 homolog OS=Mus musculus GN=Ift81 PE=1 SV=4	442.102	322.364	370.287	430.479	435.225	333.763	263.135	355.309	378.35
O35598	Disintegrin and metalloproteinase domain-containing protein 10 OS=Mus musculus GN=Adam10 PE=1 SV=2	304.62	357.258	380.884	388.175	342.184	367.238	418.727	401.916	460.702
O35604	Niemann-Pick C1 protein OS=Mus musculus GN=Npc1 PE=1 SV=2	409.015	262.038	400.706	374.518	474.383	350.505	290.936	333.474	435.105
O35607	Bone morphogenetic protein receptor type-2 OS=Mus musculus GN=Bmpr2 PE=1 SV=1	302.513	380.868	344.822	409.243	330.649	356.087	453.851	412.686	453.641
O35621	Phosphomannomutase 1 OS=Mus musculus GN=Pmm1 PE=1 SV=1	392.974	372.715	385.886	368.841	355.563	395.324	359.675	379.17	344.741
O35623	BET1 homolog OS=Mus musculus GN=Bet1 PE=1 SV=1	408.223	388.478	333.335	350.287	410.723	365.216	438.341	366.17	301.749
O35633	Vesicular inhibitory amino acid transporter OS=Mus musculus GN=Slc32a1 PE=1 SV=3	391.058	334.397	432.617	364.593	392.106	383.05	338.348	375.498	321.977
O35639	Annexin A3 OS=Mus musculus GN=Anxa3 PE=1 SV=4	393.352	403.863	384.359	362.014	324.067	354.366	374.419	346.948	421.666
O35643	AP-1 complex subunit beta-1 OS=Mus musculus GN=Ap1b1 PE=1 SV=2	420.912	372.911	367.575	336.145	416.185	372.311	351.653	371.863	319.703
O35668	Huntingtin-associated protein 1 OS=Mus musculus GN=Hap1 PE=1 SV=1	403.478	327.71	434.321	382.779	354.156	351.153	344.656	353.564	394.133
O35668-2	Isoform A of Huntingtin-associated protein 1 OS=Mus musculus GN=Hap1	404.205	318.391	430.927	389.039	364.601	351.189	343.215	344.902	400.762
O35671	Integrin beta-1-binding protein 1 OS=Mus musculus GN=Itgb1bp1 PE=1 SV=1	438.984	394.584	335.696	371.598	397.582	308.891	379.308	365.734	358.206
O35680	28S ribosomal protein S12, mitochondrial OS=Mus musculus GN=Mrps12 PE=2 SV=1	306.955	334.283	484.988	412.779	363.45	347.56	326.151	364.031	435.05
O35682	Myeloid-associated differentiation marker OS=Mus musculus GN=Myadm PE=1 SV=2	398.143	395.73	374.069	352.011	378.674	401.315	345.128	374.655	322.159
O35683	NADH dehydrogenase [ubiquinone] 1 alpha subcomplex subunit 1 OS=Mus musculus GN=Ndufa1 PE=1 SV=1	590.708	397.571	245.457	401.116	427.558	239.114	349.933	318.555	341.126
O35684	Neuroserpin OS=Mus musculus GN=Serpini1 PE=1 SV=1	378.234	381.801	426.113	331.137	373.968	387.947	374.143	383.807	299.936
O35685	Nuclear migration protein nudC OS=Mus musculus GN=Nudc PE=1 SV=1	372.219	346.01	434.878	368.171	384.603	360.399	339.019	340.158	402.14
O35704	Serine palmitoyltransferase 1 OS=Mus musculus GN=Sptlc1 PE=1 SV=2	397.909	381.376	406.05	357.885	380.096	374.187	332.296	356.995	348.485
O35710	Nocturnin OS=Mus musculus GN=Noct PE=1 SV=3	339.528	387.089	396.646	368.865	396.315	405.925	346.625	367.414	355.003
O35711-4	Isoform 4 of Liprin-beta-2 OS=Mus musculus GN=Ppfibp2	286.293	335.065	309.303	416.792	345.673	386.103	462.837	387.625	541.206
O35730	E3 ubiquitin-protein ligase RING1 OS=Mus musculus GN=Ring1 PE=1 SV=2	122.232	347.177	121.231	1241.55	263.137	175.264	834.865	494.062	252.612
O35841	Apoptosis inhibitor 5 OS=Mus musculus GN=Api5 PE=1 SV=2	393.31	347.677	383.902	357.493	422.431	337.726	350.169	347.436	408.752
O35852	Preprodynorphin (Fragment) OS=Mus musculus GN=Pdyn PE=1 SV=1	339.332	376.173	400.249	333.754	323.611	499.065	320.743	375.724	392.369
O35855	Branched-chain-amino-acid aminotransferase, mitochondrial OS=Mus musculus GN=Bcat2 PE=1 SV=2	372.807	378.507	383.523	353.528	355.13	371.964	389.716	364.872	400.253
O35857	Mitochondrial import inner membrane translocase subunit TIM44 OS=Mus musculus GN=Timm44 PE=1 SV=2	408.099	357.614	365.108	363.405	382.14	366.242	385.579	342.241	388.701
O35864	COP9 signalosome complex subunit 5 OS=Mus musculus GN=Cops5 PE=1 SV=3	414.167	398.276	373.507	332.164	419.644	365.623	352.057	362.912	307.471
O35874	Neutral amino acid transporter A OS=Mus musculus GN=Slc1a4 PE=1 SV=1	414.435	384.254	401.92	340.614	377.637	442.108	267.909	399.999	277.816
O35887	Calumenin OS=Mus musculus GN=Calu PE=1 SV=1	372.136	372.867	386.813	375.269	408.552	395.459	326.808	368.265	343.359
O35901	G7b alternative form OS=Mus musculus GN=Lsm2 PE=1 SV=1	428.291	358.117	390.195	341.64	385.915	386.757	318.023	393.65	317.789
O35926	Cyclin-dependent kinase 5 activator 2 OS=Mus musculus GN=Cdk5r2 PE=1 SV=2	186.499	339.353	331.789	411.593	306.478	352.257	612.21	404.924	599.475
O35927	Catenin delta-2 OS=Mus musculus GN=Ctnnd2 PE=1 SV=1	322.899	304.129	364.118	427.752	378.15	407.341	391.859	376.343	446.059
O35943	Frataxin, mitochondrial OS=Mus musculus GN=Fxn PE=1 SV=1	338.785	395.281	356.725	347.542	398.338	450.705	368.351	379.556	335.284
O35954	Membrane-associated phosphatidylinositol transfer protein 1 OS=Mus musculus GN=Pitpnm1 PE=1 SV=1	388.618	376.59	360.461	373.393	403.707	343.661	380.459	377.442	359.953
O35963	Ras-related protein Rab-33B OS=Mus musculus GN=Rab33b PE=1 SV=1	373.421	365.165	406.229	334.524	388.515	358.729	386.901	371.702	367.831
O35969-2	Isoform 2 of Guanidinoacetate N-methyltransferase OS=Mus musculus GN=Gamt	364.142	363.894	350.96	396.412	313.344	398.931	410.299	401.354	405.567
O35988	Syndecan-4 OS=Mus musculus GN=Sdc4 PE=1 SV=1	412.89	415.164	322.781	415.009	379.316	423.06	268.344	405.704	304.484
O54692	Centromere/kinetochore protein zw10 homolog OS=Mus musculus GN=Zw10 PE=1 SV=3	418.341	343.93	398.127	342.603	418.078	327.51	325.778	360.157	392.58
O54724	Polymerase I and transcript release factor OS=Mus musculus GN=Ptrf PE=1 SV=1	327.236	367.32	355.115	441.912	343.259	389.881	418.721	405.783	374.675
O54734	Dolichyl-diphosphooligosaccharide--protein glycosyltransferase 48 kDa subunit OS=Mus musculus GN=Ddost PE=1 SV=2	412.917	394.639	379.772	348.228	420.791	347.609	350.62	374.937	298.925
O54750	Cytochrome P450 2J6 OS=Mus musculus GN=Cyp2j6 PE=2 SV=2	381.741	348.523	320.776	363.104	328.794	325.674	479.323	446.233	422.31
O54774	AP-3 complex subunit delta-1 OS=Mus musculus GN=Ap3d1 PE=1 SV=1	415.519	366.322	389.491	350.992	402.089	381.273	328.47	357.795	335.3
O54782	Epididymis-specific alpha-mannosidase OS=Mus musculus GN=Man2b2 PE=1 SV=2	311.043	416.165	141.169	425.581	462.911	477.513	507.43	283	456.86
O54784	Death-associated protein kinase 3 OS=Mus musculus GN=Dapk3 PE=1 SV=1	334.151	382.971	373.625	363.278	347.638	400.507	407.99	390.995	393.224
O54786-2	Isoform ICAD-S of DNA fragmentation factor subunit alpha OS=Mus musculus GN=Dffa	345.745	425.297	384.2	418.481	346.094	402.628	351.241	360.914	345.678
O54804	Choline kinase alpha OS=Mus musculus GN=Chka PE=1 SV=3	355.043	371.363	368.518	332.065	369.132	432.573	479.03	364.175	311.944
O54824	Pro-interleukin-16 OS=Mus musculus GN=Il16 PE=1 SV=3	348.291	406.79	351.521	379.172	317.827	328.802	454.617	364.666	465.94
O54828	Regulator of G-protein signaling 9 OS=Mus musculus GN=Rgs9 PE=1 SV=3	340.131	391.295	456.411	343.53	337.649	351.28	385.993	397.813	355.593
O54833	Casein kinase II subunit alpha' OS=Mus musculus GN=Csnk2a2 PE=1 SV=1	371.049	399.519	414.23	323.351	343.473	371.217	359.877	395.228	370.198
O54865	Guanylate cyclase soluble subunit beta-1 OS=Mus musculus GN=Gucy1b3 PE=1 SV=1	400.453	380.031	360.127	354.401	387.386	360.559	387.649	395.777	330.124
O54879	High mobility group protein B3 OS=Mus musculus GN=Hmgb3 PE=1 SV=3	431.053	368.793	410.448	365.072	395.237	353.822	296.27	374.783	317.469
O54890	Integrin beta-3 OS=Mus musculus GN=Itgb3 PE=1 SV=2	255.081	314.809	359.428	412.122	299.963	379.153	493.828	375.972	596.798
O54901	OX-2 membrane glycoprotein OS=Mus musculus GN=Cd200 PE=1 SV=1	336.317	358.137	397.478	400.316	379.431	367.759	385.602	388.4	374.398
O54916	RalBP1-associated Eps domain-containing protein 1 OS=Mus musculus GN=Reps1 PE=1 SV=2	407.94	384.263	349.152	369.597	391.706	364.509	376.778	369.619	343.483
O54941	SWI/SNF-related matrix-associated actin-dependent regulator of chromatin subfamily E member 1 OS=Mus musculus GN=Smarce1 PE=1 SV=1	396.903	373.905	331.759	380.189	431.374	372.229	354.828	378.243	339.6
O54946	DnaJ homolog subfamily B member 6 OS=Mus musculus GN=Dnajb6 PE=1 SV=4	459.764	346.953	387.439	365.267	398.441	365.251	356.007	333.848	305.612
O54946-2	Isoform B of DnaJ homolog subfamily B member 6 OS=Mus musculus GN=Dnajb6	453.171	389.197	401.895	334.512	396.197	339.756	353.925	338.187	300.226
O54949	Serine/threonine-protein kinase NLK OS=Mus musculus GN=Nlk PE=1 SV=2	426.122	430.706	379.711	369.873	337.417	380.755	357.066	342.03	314.299
O54950	5'-AMP-activated protein kinase subunit gamma-1 OS=Mus musculus GN=Prkag1 PE=1 SV=2	343.291	446.43	378.833	321.005	401.598	428.906	331.147	399.682	291.384
O54951	Semaphorin-6B OS=Mus musculus GN=Sema6b PE=1 SV=1	276.645	367.631	414.312	438.209	314.788	431.453	378.721	414.713	386.271
O54962	Barrier-to-autointegration factor OS=Mus musculus GN=Banf1 PE=1 SV=1	395.083	397.639	308.93	357.983	365.829	441.048	337.896	416.169	344.059
O54965	E3 ubiquitin-protein ligase RNF13 OS=Mus musculus GN=Rnf13 PE=1 SV=2	369.231	396.366	353.581	380.34	410.248	353.472	275.364	466.048	348.948
O54983	Ketimine reductase mu-crystallin OS=Mus musculus GN=Crym PE=1 SV=1	417.566	381.934	357.308	365.087	375.241	376.118	365.193	373.105	337.975
O54984	ATPase Asna1 OS=Mus musculus GN=Asna1 PE=1 SV=2	416.871	385.981	359.576	359.165	395.211	363.865	344.89	384.449	330.641
O54988-2	Isoform 2 of STE20-like serine/threonine-protein kinase OS=Mus musculus GN=Slk	355.591	318.855	369.752	385.844	436.428	374.94	360.08	337.373	438.598
O54991	Contactin-associated protein 1 OS=Mus musculus GN=Cntnap1 PE=1 SV=2	401.842	389.341	361.003	372.564	400.058	366.879	375.295	364.384	321.566
O55003	BCL2/adenovirus E1B 19 kDa protein-interacting protein 3 OS=Mus musculus GN=Bnip3 PE=1 SV=1	370.206	358.223	430.768	438.53	301.327	374.38	378.727	373.95	355.917
O55013	Trafficking protein particle complex subunit 3 OS=Mus musculus GN=Trappc3 PE=1 SV=1	368.134	355.773	327.987	380.039	398.016	412.568	385.021	386.253	371.583
O55017-2	Isoform NB2 of Voltage-dependent N-type calcium channel subunit alpha-1B OS=Mus musculus GN=Cacna1b	367.207	369.917	414.63	389.03	353.036	379.99	347.849	359.299	381.923
O55022	Membrane-associated progesterone receptor component 1 OS=Mus musculus GN=Pgrmc1 PE=1 SV=4	339.429	430.432	383.007	359.802	361.024	425.508	340.962	418.943	303.488
O55026	Ectonucleoside triphosphate diphosphohydrolase 2 OS=Mus musculus GN=Entpd2 PE=1 SV=2	378.242	299.004	342.411	418.76	354.765	351.225	445.141	385.942	441.411
O55028	[3-methyl-2-oxobutanoate dehydrogenase [lipoamide]] kinase, mitochondrial OS=Mus musculus GN=Bckdk PE=1 SV=1	440.173	397.885	376.147	355.295	329.539	348.513	351.252	391.027	348.186
O55029	Coatomer subunit beta' OS=Mus musculus GN=Copb2 PE=1 SV=2	367.293	377.114	363.725	359.416	399.677	370.03	384.717	368.968	379.481
O55033	Cytoplasmic protein NCK2 OS=Mus musculus GN=Nck2 PE=1 SV=1	292.114	372.809	375.893	397.601	359.865	424.727	374.415	416.708	396.906
O55042	Alpha-synuclein OS=Mus musculus GN=Snca PE=1 SV=2	383.919	374.7	360.131	407.213	396.344	393.612	349.882	375.654	323.155
O55057	Retinal rod rhodopsin-sensitive cGMP 3',5'-cyclic phosphodiesterase subunit delta OS=Mus musculus GN=Pde6d PE=1 SV=1	397.61	385.163	350.761	353.424	387.575	374.734	405.36	396.299	310.134
O55091	Protein IMPACT OS=Mus musculus GN=Impact PE=1 SV=2	347.648	373.054	417.669	386.841	366.199	404.896	327.45	379.634	357.528
O55100	Synaptogyrin-1 OS=Mus musculus GN=Syngr1 PE=1 SV=2	343.477	358.581	327.72	403.134	425.018	369.919	413.566	386.489	375.899
O55102	Biogenesis of lysosome-related organelles complex 1 subunit 1 OS=Mus musculus GN=Bloc1s1 PE=1 SV=2	432.086	436.429	324.395	339.147	414.699	386.903	336.562	349.072	308.101
O55103	Periaxin OS=Mus musculus GN=Prx PE=1 SV=1	300.195	235.728	845.862	205.303	81.2901	79.6465	202.181	239.737	1124.34
O55106	Striatin OS=Mus musculus GN=Strn PE=1 SV=2	375.835	392.856	368.268	381.096	367.224	372.709	373.271	383.23	356.042
O55125	Protein NipSnap homolog 1 OS=Mus musculus GN=Nipsnap1 PE=1 SV=1	389.985	358.499	394.75	367.246	371.285	365.704	359.325	356.152	393.145
O55126	Protein NipSnap homolog 2 OS=Mus musculus GN=Gbas PE=1 SV=1	385.82	363.345	344.69	386.249	381.71	363.028	389.475	346.934	420.863
O55131	Septin-7 OS=Mus musculus GN=Sept7 PE=1 SV=1	438.816	346.846	384.924	370.935	420.219	345.354	335.383	338.688	344.298
O55135	Eukaryotic translation initiation factor 6 OS=Mus musculus GN=Eif6 PE=1 SV=2	411.691	359.569	366.328	400.386	458.503	309.309	334.291	357.52	345.584
O55137	Acyl-coenzyme A thioesterase 1 OS=Mus musculus GN=Acot1 PE=1 SV=1	454.528	360.415	315.162	340.953	424.001	320.626	417.995	359.936	355.188
O55142	60S ribosomal protein L35a OS=Mus musculus GN=Rpl35a PE=1 SV=2	452.645	337.476	419.971	343.353	357.348	328.864	411.838	372.74	303.299
O55143	Sarcoplasmic/endoplasmic reticulum calcium ATPase 2 OS=Mus musculus GN=Atp2a2 PE=1 SV=2	416.71	372.573	357.603	383.17	390.203	342.303	381.737	355.09	358.607
O55186	CD59A glycoprotein OS=Mus musculus GN=Cd59a PE=2 SV=1	307.098	433.647	369.244	493.583	259.893	374.742	381.683	438.835	382.95
O55187	E3 SUMO-protein ligase CBX4 OS=Mus musculus GN=Cbx4 PE=1 SV=2	330.609	187.631	332.79	483.417	505.39	354.768	353.626	355.875	523.375
O55201	Transcription elongation factor SPT5 OS=Mus musculus GN=Supt5h PE=1 SV=1	354.965	359.305	376.56	383.776	338.54	354.742	408.001	385.474	436.754
O55222	Integrin-linked protein kinase OS=Mus musculus GN=Ilk PE=1 SV=2	380.011	358.742	404.171	381.966	387.552	371.025	343.472	359.257	366.904
O55229	Choline/ethanolamine kinase OS=Mus musculus GN=Chkb PE=1 SV=3	334.099	383.737	394.65	388.504	346.329	373.545	358.065	382.437	426.471
O55234	Proteasome subunit beta type-5 OS=Mus musculus GN=Psmb5 PE=1 SV=3	411.484	354.194	322.274	323.669	436.063	395.334	368.781	385.743	349.181
O70146	Dual specificity testis-specific protein kinase 1 OS=Mus musculus GN=Tesk1 PE=1 SV=3	551.289	370.562	414.258	336.87	416.635	282.643	238.754	347.887	282.659
O70152	Dolichol-phosphate mannosyltransferase subunit 1 OS=Mus musculus GN=Dpm1 PE=1 SV=1	380.239	378.289	327.003	404.903	367.201	388.652	392.53	356.361	397.528
O70166	Stathmin-3 OS=Mus musculus GN=Stmn3 PE=1 SV=1	383.454	295.374	378.314	386.538	419.5	353.962	324.978	355.241	467.828
O70172	Phosphatidylinositol 5-phosphate 4-kinase type-2 alpha OS=Mus musculus GN=Pip4k2a PE=1 SV=1	389.461	395.871	381.608	350.194	363.981	396.077	352.14	373.788	345.231
O70194	Eukaryotic translation initiation factor 3 subunit D OS=Mus musculus GN=Eif3d PE=1 SV=2	406.476	386.101	362.329	371.192	389.334	364.498	380.083	354.849	339.552
O70200	Allograft inflammatory factor 1 OS=Mus musculus GN=Aif1 PE=1 SV=1	485.109	390.779	451.776	303.74	317.788	375.631	268.189	432.591	239.173
O70250	Phosphoglycerate mutase 2 OS=Mus musculus GN=Pgam2 PE=1 SV=3	396.329	308.085	385.48	373.9	398.968	394.242	337.762	368.23	389.594
O70251	Elongation factor 1-beta OS=Mus musculus GN=Eef1b PE=1 SV=5	405.677	382.323	402.629	354.909	390.268	386.334	327.983	341.21	336.855
O70252	Heme oxygenase 2 OS=Mus musculus GN=Hmox2 PE=1 SV=1	387.758	392.94	378.23	380.362	368.126	383.485	346.307	374.569	343.982
O70274	Protein tyrosine phosphatase type IVA 2 OS=Mus musculus GN=Ptp4a2 PE=1 SV=1	405.54	337.442	418.747	353.434	437.587	357.552	278.453	377.729	346.623
O70281	Protein-tyrosine sulfotransferase 1 OS=Mus musculus GN=Tpst1 PE=2 SV=1	401.449	387.494	404.983	356.626	346.297	368.92	380.944	299.757	404.39
O70293-2	Isoform GRK6B of G protein-coupled receptor kinase 6 OS=Mus musculus GN=Grk6	347.524	363.781	372.491	377.796	356.077	367.397	428.966	399.392	384.488
O70310	Glycylpeptide N-tetradecanoyltransferase 1 OS=Mus musculus GN=Nmt1 PE=1 SV=1	326.16	391.816	382.227	375.081	359.841	396.094	410.792	372.504	379.909
O70311	Glycylpeptide N-tetradecanoyltransferase 2 OS=Mus musculus GN=Nmt2 PE=1 SV=1	457.17	315.223	357.59	346.997	444.721	321.549	356.184	323.483	405.573
O70318	Band 4.1-like protein 2 OS=Mus musculus GN=Epb41l2 PE=1 SV=2	381.104	345.842	358.043	399.822	372.379	384.918	388.015	365.189	387.88
O70325	Phospholipid hydroperoxide glutathione peroxidase, mitochondrial OS=Mus musculus GN=Gpx4 PE=1 SV=4	423.688	368.926	373.372	349.454	387.224	340.681	377.518	353.697	369.226
O70340	Neuronal pentraxin-2 OS=Mus musculus GN=Nptx2 PE=2 SV=1	254.052	514.6	309.807	344.337	477.87	449.542	352.718	345.746	342.718
O70354	Carbonic anhydrase-related protein 11 OS=Mus musculus GN=Ca11 PE=2 SV=2	310.785	364.955	412.58	357.743	328.359	366.859	421.945	429.544	409.523
O70374	Protein CBFA2T2 OS=Mus musculus GN=Cbfa2t2 PE=1 SV=3	306.495	194.993	261.91	504.079	588.809	289.014	254.308	327.02	718.909
O70378	ER membrane protein complex subunit 8 OS=Mus musculus GN=Emc8 PE=1 SV=1	444.834	299.265	356.406	419.009	452.102	345.804	325.641	315.638	382.988
O70400	PDZ and LIM domain protein 1 OS=Mus musculus GN=Pdlim1 PE=1 SV=4	404.682	412.224	358.81	367.42	351.793	430.806	337.42	358.379	325.425
O70401	Tetraspanin-6 OS=Mus musculus GN=Tspan6 PE=1 SV=1	433.882	368.062	380.694	338.53	417.541	392.566	310.368	355.371	314.355
O70422	General transcription factor IIH subunit 4 OS=Mus musculus GN=Gtf2h4 PE=1 SV=1	340.156	373.197	369.112	354.13	351.353	336.165	399.962	409.769	464.285
O70423	Membrane primary amine oxidase OS=Mus musculus GN=Aoc3 PE=1 SV=3	392.571	400.152	369.716	332.077	397.465	395.832	357.313	379.751	314.861
O70433	Four and a half LIM domains protein 2 OS=Mus musculus GN=Fhl2 PE=1 SV=1	389.907	358.165	404.747	374.133	331.091	373.579	372.652	360.386	399.276
O70435	Proteasome subunit alpha type-3 OS=Mus musculus GN=Psma3 PE=1 SV=3	451.972	362.498	350.463	336.994	416.647	346.29	370.458	341.248	352.303
O70443	Guanine nucleotide-binding protein G(z) subunit alpha OS=Mus musculus GN=Gnaz PE=1 SV=4	365.006	382.888	376.297	330.594	403.18	404.022	386.417	367.722	340.102
O70475	UDP-glucose 6-dehydrogenase OS=Mus musculus GN=Ugdh PE=1 SV=1	306.853	364.713	388.344	355.492	341.987	433.328	387.598	477.485	339.186
O70480	Vesicle-associated membrane protein 4 OS=Mus musculus GN=Vamp4 PE=1 SV=1	331.626	410.02	384.543	391.596	306.604	386.824	340.299	410.22	431.656
O70481	E3 ubiquitin-protein ligase UBR1 OS=Mus musculus GN=Ubr1 PE=1 SV=2	331.128	390.513	374.205	381.941	350.931	392.204	411.125	403.088	362.335
O70496	H(+)/Cl(-) exchange transporter 7 OS=Mus musculus GN=Clcn7 PE=1 SV=1	355.289	416.753	348.722	414.81	365.311	443.746	403.787	308.04	333.349
O70503	Very-long-chain 3-oxoacyl-CoA reductase OS=Mus musculus GN=Hsd17b12 PE=1 SV=1	386.53	394.489	364.244	386.645	372.095	362.007	376.221	359.144	367.54
O70546-2	Isoform 2 of Lysine-specific demethylase 6A OS=Mus musculus GN=Kdm6a	376.39	354.975	423.012	328.269	362.738	340.236	367.769	333.18	467.262
O70551	SRSF protein kinase 1 OS=Mus musculus GN=Srpk1 PE=1 SV=2	389.417	371.822	388.452	355.248	378.221	358.403	347.426	381.889	379.933
O70572	Sphingomyelin phosphodiesterase 2 OS=Mus musculus GN=Smpd2 PE=1 SV=1	250.906	438.42	328.015	404.006	326.843	351.65	507.968	416.047	451.143
O70585	Dystrobrevin beta OS=Mus musculus GN=Dtnb PE=1 SV=3	402.405	506.431	271.841	353.031	380.234	370.092	453.03	331.522	311.232
O70589	Peripheral plasma membrane protein CASK OS=Mus musculus GN=Cask PE=1 SV=2	400.692	361.489	395.992	350.332	385.573	364.621	347.439	366.906	368.203
O70591	Prefoldin subunit 2 OS=Mus musculus GN=Pfdn2 PE=1 SV=2	334.811	373.656	414.179	358.217	402.177	406.62	343.872	399.901	322.64
O70622	Reticulon-2 OS=Mus musculus GN=Rtn2 PE=1 SV=1	431.784	332.979	378.762	324.04	324.635	469.265	247.006	413.494	397.333
O70628	High affinity cGMP-specific 3',5'-cyclic phosphodiesterase 9A OS=Mus musculus GN=Pde9a PE=1 SV=1	422.752	211.119	427.948	442.43	420.543	366.217	206.943	345.405	489.624
O88271	Craniofacial development protein 1 OS=Mus musculus GN=Cfdp1 PE=1 SV=1	376.275	380.406	426.146	354.368	336.632	381.232	323.733	387.379	379.29
O88286	Protein Wiz OS=Mus musculus GN=Wiz PE=1 SV=2	471.785	365.598	344.131	290.353	473.709	353.513	278.918	379.782	326.14
O88307	Sortilin-related receptor OS=Mus musculus GN=Sorl1 PE=1 SV=3	367.47	382.819	362.334	363.223	399.776	337.548	403.021	355.973	405.324
O88322	Nidogen-2 OS=Mus musculus GN=Nid2 PE=1 SV=2	378.718	378.792	356.376	383.407	353.379	388.547	387.217	374.887	378.91
O88325	Alpha-N-acetylglucosaminidase OS=Mus musculus GN=Naglu PE=1 SV=1	382.687	363.162	423.707	355.054	340.884	361.14	340.458	381.52	401.489
O88342	WD repeat-containing protein 1 OS=Mus musculus GN=Wdr1 PE=1 SV=3	364.1	373.876	392.994	386.981	367.184	373.652	368.755	375.932	367.518
O88351	Inhibitor of nuclear factor kappa-B kinase subunit beta OS=Mus musculus GN=Ikbkb PE=1 SV=1	402.042	367.866	386.003	355.888	381.142	333.791	349.713	374.861	397.657
O88428	Bifunctional 3'-phosphoadenosine 5'-phosphosulfate synthase 2 OS=Mus musculus GN=Papss2 PE=1 SV=2	379.146	333.371	412.245	387.174	344.085	386.613	355.307	371.05	396.499
O88441	Metaxin-2 OS=Mus musculus GN=Mtx2 PE=1 SV=1	387.111	293.004	441.351	321.367	409.023	328.246	350.922	317.005	491.522
O88444	Adenylate cyclase type 1 OS=Mus musculus GN=Adcy1 PE=1 SV=2	340.964	390.799	393.622	308.968	286.572	428.517	398.5	410.203	424.038
O88485	Cytoplasmic dynein 1 intermediate chain 1 OS=Mus musculus GN=Dync1i1 PE=1 SV=2	380.417	381.914	391.28	375.147	385.135	380.104	344.564	386.777	325.58
O88492	Perilipin-4 OS=Mus musculus GN=Plin4 PE=1 SV=2	360.156	355.665	357.484	357.358	398.138	368.095	424.716	345.128	420.269
O88502	High affinity cAMP-specific and IBMX-insensitive 3',5'-cyclic phosphodiesterase 8A OS=Mus musculus GN=Pde8a PE=1 SV=1	387.04	383.417	393.827	382.94	327.03	389.725	375.814	374.73	350.876
O88507	Ciliary neurotrophic factor receptor subunit alpha OS=Mus musculus GN=Cntfr PE=1 SV=2	382.385	409.117	326.853	379.096	390.486	326.94	477.361	355.457	347.159
O88520	Leucine-rich repeat protein SHOC-2 OS=Mus musculus GN=Shoc2 PE=1 SV=2	430.245	396.718	396.79	388.349	375.997	369.146	266.378	393.456	298.57
O88531	Palmitoyl-protein thioesterase 1 OS=Mus musculus GN=Ppt1 PE=1 SV=2	363.816	394.242	347.66	394.82	335.687	373.708	441.393	390.433	361.184
O88532	Zinc finger RNA-binding protein OS=Mus musculus GN=Zfr PE=1 SV=2	367.916	355.447	400.75	389.278	390.772	372.818	346.891	362.666	375.192
O88533	Aromatic-L-amino-acid decarboxylase OS=Mus musculus GN=Ddc PE=1 SV=1	400.019	384.815	359.897	377.085	362.007	358.979	387.607	395.964	339.806
O88543	COP9 signalosome complex subunit 3 OS=Mus musculus GN=Cops3 PE=1 SV=3	411.893	374.572	400.966	339.341	372.407	371.738	350.428	357.061	354.289
O88544	COP9 signalosome complex subunit 4 OS=Mus musculus GN=Cops4 PE=1 SV=1	419.144	377.41	377.904	344.452	395.946	374.39	343.789	366.551	331.159
O88545	COP9 signalosome complex subunit 6 OS=Mus musculus GN=Cops6 PE=1 SV=1	391.352	387.54	390.562	348.313	341.316	356.699	389.127	378.188	376.94
O88569	Heterogeneous nuclear ribonucleoproteins A2/B1 OS=Mus musculus GN=Hnrnpa2b1 PE=1 SV=2	385.369	329.25	353.752	412.519	430.68	350.953	364.063	352.271	396.086
O88587	Catechol O-methyltransferase OS=Mus musculus GN=Comt PE=1 SV=2	360.248	352.055	407.646	365.998	360.958	346.59	399.271	348.142	436.99
O88597	Beclin-1 OS=Mus musculus GN=Becn1 PE=1 SV=3	341.178	391.673	340.545	362.895	433.28	445.078	324.92	419.815	303.714
O88602	Voltage-dependent calcium channel gamma-2 subunit OS=Mus musculus GN=Cacng2 PE=1 SV=1	351.389	341.612	375.361	347.642	441.354	349.883	365.117	375.656	419.658
O88622	Poly(ADP-ribose) glycohydrolase OS=Mus musculus GN=Parg PE=1 SV=2	287.823	398.054	351.875	340.914	363.678	429.385	375.876	406.506	453.871
O88653	Ragulator complex protein LAMTOR3 OS=Mus musculus GN=Lamtor3 PE=1 SV=1	324.146	405.035	355.024	415.204	308.954	389.675	375.612	418.643	424.433
O88673	Diacylglycerol kinase alpha OS=Mus musculus GN=Dgka PE=1 SV=2	353.77	374.836	376.862	374.901	417.777	363.657	387.842	377.86	344.036
O88685	26S protease regulatory subunit 6A OS=Mus musculus GN=Psmc3 PE=1 SV=2	361.347	370.756	376.135	380.051	368.049	384.766	384.923	384.505	367.921
O88696	ATP-dependent Clp protease proteolytic subunit, mitochondrial OS=Mus musculus GN=Clpp PE=1 SV=1	423.053	391.307	358.112	343.984	405.757	370.45	332.535	355.111	350.76
O88703	Potassium/sodium hyperpolarization-activated cyclic nucleotide-gated channel 2 OS=Mus musculus GN=Hcn2 PE=1 SV=1	366.954	361.659	394.311	367.382	360.1	326.94	422.422	363.269	419.953
O88704	Potassium/sodium hyperpolarization-activated cyclic nucleotide-gated channel 1 OS=Mus musculus GN=Hcn1 PE=1 SV=1	363.417	347.553	411.183	374.792	355.965	347.845	383.543	371.903	418.733
O88705	Potassium/sodium hyperpolarization-activated cyclic nucleotide-gated channel 3 OS=Mus musculus GN=Hcn3 PE=1 SV=1	376.139	412.024	362.447	352.645	371.584	396.242	383.961	345.686	363.224
O88708	Origin recognition complex subunit 4 OS=Mus musculus GN=Orc4 PE=1 SV=2	138.676	317.697	308.016	555.45	316.267	415.37	513.75	440.71	575.42
O88712	C-terminal-binding protein 1 OS=Mus musculus GN=Ctbp1 PE=1 SV=2	328.164	401.885	348.184	377.993	386.139	411.803	388.015	404.489	345.613
O88737	Protein bassoon OS=Mus musculus GN=Bsn PE=1 SV=4	346.316	338.719	417.233	390.427	373.226	399.73	333.724	358.94	410.847
O88738	Baculoviral IAP repeat-containing protein 6 OS=Mus musculus GN=Birc6 PE=1 SV=2	387.438	359.367	420.747	361.189	375.181	370.426	340.421	349.005	378.766
O88741	Ganglioside-induced differentiation-associated protein 1 OS=Mus musculus GN=Gdap1 PE=1 SV=1	360.769	402.645	406.535	354.182	373.515	399.971	338.699	378.37	333.503
O88745	Scrapie-responsive protein 1 OS=Mus musculus GN=Scrg1 PE=2 SV=1	375.965	369.28	415.279	355.085	389.919	382.985	332.658	379.241	339.698
O88792	Junctional adhesion molecule A OS=Mus musculus GN=F11r PE=1 SV=2	482.012	341.037	408.165	389.62	318.175	358.97	375.401	389.902	261.039
O88809	Neuronal migration protein doublecortin OS=Mus musculus GN=Dcx PE=1 SV=1	409.719	273.82	422.397	409.503	397.702	399.058	342.504	353.413	336.223
O88811	Signal transducing adapter molecule 2 OS=Mus musculus GN=Stam2 PE=1 SV=1	367.942	366.421	385.228	342.827	358.603	399.669	397.575	372.976	377.634
O88819	Alpha-(1,3)-fucosyltransferase 9 OS=Mus musculus GN=Fut9 PE=2 SV=1	410.123	401.558	418.855	274.506	329.078	342.958	371.48	426.349	349.69
O88829	Lactosylceramide alpha-2,3-sialyltransferase OS=Mus musculus GN=St3gal5 PE=2 SV=2	370.591	446.022	387.264	374.269	314.804	390.476	371.288	363.241	349.035
O88834-2	Isoform 2 of SH2 domain-containing adapter protein D OS=Mus musculus GN=Shd	297.308	400.211	331.443	435.374	321.586	381.619	454.727	399.952	430.856
O88839	Disintegrin and metalloproteinase domain-containing protein 15 OS=Mus musculus GN=Adam15 PE=1 SV=2	346.12	308.862	402.991	480.064	386.52	353.341	372.983	355.5	396.129
O88844	Isocitrate dehydrogenase [NADP] cytoplasmic OS=Mus musculus GN=Idh1 PE=1 SV=2	390.49	358.486	381.818	358.725	362.544	366.955	405.334	367.005	375.524
O88845	A-kinase anchor protein 10, mitochondrial OS=Mus musculus GN=Akap10 PE=1 SV=3	382.851	353.625	381.754	382.695	371.771	369.19	367.446	376.46	381.91
O88848	ADP-ribosylation factor-like protein 6 OS=Mus musculus GN=Arl6 PE=1 SV=1	382.801	401.601	384.437	342.595	369.345	403.196	344.507	397.959	317.567
O88851	Putative hydrolase RBBP9 OS=Mus musculus GN=Rbbp9 PE=1 SV=2	352.94	406.696	347.883	366.347	318.433	389.555	428.742	400.016	391.169
O88935	Synapsin-1 OS=Mus musculus GN=Syn1 PE=1 SV=2	358.176	359.583	399.987	381.106	364.967	396.777	349.927	376.81	380.775
O88939	Zinc finger and BTB domain-containing protein 7A OS=Mus musculus GN=Zbtb7a PE=1 SV=2	328.953	440.323	248.047	326.346	438.703	386.281	397.936	422.248	417.111
O88951	Protein lin-7 homolog B OS=Mus musculus GN=Lin7b PE=1 SV=2	352.126	335.484	388.711	389.212	358.754	390.589	396.302	382.077	395.979
O88952	Protein lin-7 homolog C OS=Mus musculus GN=Lin7c PE=1 SV=2	371.229	389.522	367.408	394.691	358.397	392.789	379.537	381.673	341.465
O88958	Glucosamine-6-phosphate isomerase 1 OS=Mus musculus GN=Gnpda1 PE=1 SV=3	367.645	387.694	394.171	309.287	422.522	414.713	347.159	377.443	311.233
O88967	ATP-dependent zinc metalloprotease YME1L1 OS=Mus musculus GN=Yme1l1 PE=1 SV=1	347.267	375.961	344.006	369.221	349.787	367.032	428.754	381.839	444.15
O88968	Transcobalamin-2 OS=Mus musculus GN=Tcn2 PE=1 SV=1	266.029	255.524	286.667	339.763	302.94	513.609	498.748	571.672	446.607
O88983	Syntaxin-8 OS=Mus musculus GN=Stx8 PE=1 SV=1	358.571	379.094	346.513	372.144	391.937	379.304	402.439	373.672	382.545
O88986	2-amino-3-ketobutyrate coenzyme A ligase, mitochondrial OS=Mus musculus GN=Gcat PE=1 SV=2	397.741	359.402	364.436	355.457	340.434	315.647	421.317	365.09	463.539
O88998	Noelin OS=Mus musculus GN=Olfm1 PE=1 SV=1	392.838	357.334	420.123	336.29	408.596	365.709	330.682	359.46	355.708
O89001	Carboxypeptidase D OS=Mus musculus GN=Cpd PE=1 SV=2	337.82	383.985	396.11	358.309	344	397.358	383.187	395.073	384.759
O89016	ATP-binding cassette sub-family D member 4 OS=Mus musculus GN=Abcd4 PE=1 SV=2	291.327	297.609	307.339	459.573	431.353	402.199	422.62	477.252	360.437
O89017	Legumain OS=Mus musculus GN=Lgmn PE=1 SV=1	405.719	381.318	387.511	323.454	385.193	348.224	364.459	349.558	393.787
O89023	Tripeptidyl-peptidase 1 OS=Mus musculus GN=Tpp1 PE=1 SV=2	386.465	375.591	385.82	383.42	435.436	366.55	334.019	333.42	342.267
O89032	SH3 and PX domain-containing protein 2A OS=Mus musculus GN=Sh3pxd2a PE=1 SV=2	335.738	338.803	341.423	298.95	272.213	430.662	444.551	414.825	544.464
O89050	Muskelin OS=Mus musculus GN=Mkln1 PE=1 SV=1	370.765	384.186	348.499	332.202	441.513	386.924	367.027	358.186	365.349
O89051	Integral membrane protein 2B OS=Mus musculus GN=Itm2b PE=1 SV=1	341.117	400.186	364.843	398.13	357.782	412.506	370.427	403.868	338.547
O89053	Coronin-1A OS=Mus musculus GN=Coro1a PE=1 SV=5	388.28	339.352	381.082	364.376	389.851	370.605	354.295	354.894	416.647
O89079	Coatomer subunit epsilon OS=Mus musculus GN=Cope PE=1 SV=3	400.824	385.424	410.698	327.725	406.8	346.306	332.085	365.611	347.126
O89084	cAMP-specific 3',5'-cyclic phosphodiesterase 4A OS=Mus musculus GN=Pde4a PE=1 SV=2	370.368	371.017	423.755	365.437	369.317	427.472	325.831	378.168	308.597
O89086	RNA-binding protein 3 OS=Mus musculus GN=Rbm3 PE=1 SV=1	360.713	237.535	297.13	490.191	459.708	282.349	404.114	391.694	519.517
O89112	LanC-like protein 1 OS=Mus musculus GN=Lancl1 PE=1 SV=1	365.82	389.029	392.461	350.857	354.728	391.203	382.374	378.258	359.541
O89116	Vesicle transport through interaction with t-SNAREs homolog 1A OS=Mus musculus GN=Vti1a PE=1 SV=1	384.739	366.537	270.691	382.718	502.874	333.243	462.721	372.554	316.088
P00158	Cytochrome b OS=Mus musculus GN=Mt-Cyb PE=1 SV=1	348.413	379.728	310.317	283.445	447.799	454.891	370.268	432.128	333.53
P00375	Dihydrofolate reductase OS=Mus musculus GN=Dhfr PE=1 SV=3	405.898	395.919	362.974	405.546	356.669	369.444	363.783	383.703	318.346
P00397	Cytochrome c oxidase subunit 1 OS=Mus musculus GN=Mtco1 PE=1 SV=2	383.629	341.85	348.17	366.816	318.177	370.982	423.698	383.096	463.348
P00405	Cytochrome c oxidase subunit 2 OS=Mus musculus GN=Mtco2 PE=1 SV=1	343.597	411.638	381.075	402.171	310.551	359.988	426.308	359.538	411.255
P00416	Cytochrome c oxidase subunit 3 OS=Mus musculus GN=mt-Co3 PE=1 SV=2	289.719	227.902	400.987	361.704	446.116	437.873	391.336	333.938	515.98
P00493	Hypoxanthine-guanine phosphoribosyltransferase OS=Mus musculus GN=Hprt1 PE=1 SV=3	383.82	386.178	380.579	365.387	383.232	370.274	370.19	373.513	343.466
P00520-4	Isoform IV of Tyrosine-protein kinase ABL1 OS=Mus musculus GN=Abl1	370.939	293.31	405.462	402.772	361.893	363.358	374.072	335.629	477.237
P00920	Carbonic anhydrase 2 OS=Mus musculus GN=Ca2 PE=1 SV=4	452.892	381.757	353.818	348.056	355.777	355.284	363.524	359.877	366.64
P01027	Complement C3 OS=Mus musculus GN=C3 PE=1 SV=3	427.624	363.169	397.237	342.144	341.118	288.759	452.616	369.019	377.312
P01029	Complement C4-B OS=Mus musculus GN=C4b PE=1 SV=3	342.809	394.35	321.532	351.985	272.097	520.835	411.142	409.29	385.668
P01831	Thy-1 membrane glycoprotein OS=Mus musculus GN=Thy1 PE=1 SV=1	312.006	399.245	381.1	392.752	340.605	414.289	374.597	405.289	380.052
P01897	H-2 class I histocompatibility antigen, L-D alpha chain OS=Mus musculus GN=H2-L PE=1 SV=2	350.921	391.85	335.586	366.826	322.175	346.232	448.078	475.77	375.806
P01901	H-2 class I histocompatibility antigen, K-B alpha chain OS=Mus musculus GN=H2-K1 PE=1 SV=1	319.798	380.183	363.203	385.234	272.812	298.221	556.7	467.816	412.364
P02089	Hemoglobin subunit beta-2 OS=Mus musculus GN=Hbb-b2 PE=1 SV=2	449.448	369.437	340.656	284.492	393.206	326.105	398.922	378.111	393.761
P02301	Histone H3.3C OS=Mus musculus GN=H3f3c PE=3 SV=3	389.088	366.105	338.468	428.942	377.892	337.682	356.962	368.367	424.603
P02463	Collagen alpha-1(IV) chain OS=Mus musculus GN=Col4a1 PE=1 SV=4	489.015	317.843	462.509	254.465	374.562	373.554	266.618	381.773	331.522
P02798	Metallothionein-2 OS=Mus musculus GN=Mt2 PE=1 SV=2	382.311	87.0996	394.718	460.1	575.812	343.81	183.93	201.866	730.581
P02802	Metallothionein-1 OS=Mus musculus GN=Mt1 PE=1 SV=1	373.55	104.531	340.921	558.144	633.709	352.437	180.171	208.912	630.218
P03899	NADH-ubiquinone oxidoreductase chain 3 OS=Mus musculus GN=Mtnd3 PE=1 SV=3	314.775	365.346	370.813	391.679	414.028	412.325	425.09	386.398	317.459
P03903	NADH-ubiquinone oxidoreductase chain 4L OS=Mus musculus GN=Mtnd4l PE=1 SV=2	416.898	423.444	309.23	325.269	462.649	380.993	393.363	362.122	262.754
P03911	NADH-ubiquinone oxidoreductase chain 4 OS=Mus musculus GN=Mtnd4 PE=1 SV=1	304.712	358.603	339.413	340.329	409.631	513.098	400.58	424.759	300.495
P03921	NADH-ubiquinone oxidoreductase chain 5 OS=Mus musculus GN=Mtnd5 PE=1 SV=3	327.799	366.413	358.797	337.286	385.775	374.85	427.433	392.173	427.672
P03930	ATP synthase protein 8 OS=Mus musculus GN=Mtatp8 PE=1 SV=1	388.486	400.804	306.827	357.627	412.284	449.729	327.624	391.548	320.724
P03953	Complement factor D OS=Mus musculus GN=Cfd PE=1 SV=1	373.273	519.158	271.912	406.397	276.412	153.387	544.92	447.118	466.943
P03975	IgE-binding protein OS=Mus musculus GN=Iap PE=2 SV=1	361.351	294.088	334.589	454.739	354.751	359.377	395.215	430.86	440.708
P03987	Ig gamma-3 chain C region OS=Mus musculus PE=1 SV=2	361.414	441.67	312.963	416.8	589.21	303.462	178.412	300.134	425.248
P03995	Glial fibrillary acidic protein OS=Mus musculus GN=Gfap PE=1 SV=4	397.992	333.256	356.86	348.099	354.827	412.562	373.622	346.815	444.566
P04370	Myelin basic protein OS=Mus musculus GN=Mbp PE=1 SV=2	349.967	378.646	364.085	446.995	364.796	368.847	369.979	352.952	404.866
P04401	Interleukin-5 OS=Mus musculus GN=Il5 PE=1 SV=1	403.065	386.414	397.568	361.623	356.066	364.169	385.886	355.246	339.829
P04919	Band 3 anion transport protein OS=Mus musculus GN=Slc4a1 PE=1 SV=1	381.004	350.165	339.155	348.843	311.427	348.061	478.238	387.131	467.525
P04925	Major prion protein OS=Mus musculus GN=Prnp PE=1 SV=2	371.538	347.248	384.707	370.616	382.129	347.085	427.442	366.868	382.343
P05063	Fructose-bisphosphate aldolase C OS=Mus musculus GN=Aldoc PE=1 SV=4	377.329	385.074	354.178	401.857	382.117	357.994	380.857	360.138	380.771
P05132	cAMP-dependent protein kinase catalytic subunit alpha OS=Mus musculus GN=Prkaca PE=1 SV=3	364.714	404.873	373.729	355.096	374.847	412.414	349.951	390.042	331.985
P05201	Aspartate aminotransferase, cytoplasmic OS=Mus musculus GN=Got1 PE=1 SV=3	372.462	388.567	379.955	368.632	373.455	389.44	355.189	380.576	352.36
P05202	Aspartate aminotransferase, mitochondrial OS=Mus musculus GN=Got2 PE=1 SV=1	391.861	384.588	340.021	398.497	398.799	376.023	366.206	366.27	347.009
P05480	Neuronal proto-oncogene tyrosine-protein kinase Src OS=Mus musculus GN=Src PE=1 SV=4	358.3	352.004	356.157	363.409	391.684	378.461	429.215	365.686	395.068
P05532	Mast/stem cell growth factor receptor Kit OS=Mus musculus GN=Kit PE=1 SV=3	382.347	389.417	366.496	380.963	391.052	353.257	360.718	370.358	369.333
P05784	Keratin, type I cytoskeletal 18 OS=Mus musculus GN=Krt18 PE=1 SV=5	497.168	379.473	296.254	375.231	390.056	294.59	441.731	287.442	392.847
P06330	Ig heavy chain V region AC38 205.12 OS=Mus musculus PE=1 SV=1	338.521	526.337	312.288	257.378	362.223	414.128	476.136	300.246	394.323
P06728	Apolipoprotein A-IV OS=Mus musculus GN=Apoa4 PE=1 SV=3	520.94	350.381	378.563	346.65	362.304	302.422	357.884	397.16	283.945
P06745	Glucose-6-phosphate isomerase OS=Mus musculus GN=Gpi PE=1 SV=4	377.406	377.905	385.752	347.744	365.398	380.711	369.63	365.37	390.044
P06797	Cathepsin L1 OS=Mus musculus GN=Ctsl PE=1 SV=2	208.559	306.111	385.003	457.576	352.942	412.206	447.19	390.37	526.463
P06801	NADP-dependent malic enzyme OS=Mus musculus GN=Me1 PE=1 SV=2	375.733	404.497	364.555	368.61	355.287	379.752	401.01	392.863	330.82
P06837	Neuromodulin OS=Mus musculus GN=Gap43 PE=1 SV=1	418.396	186.301	509.154	412.295	510.519	358.877	212.127	280.605	397.513
P06880	Somatotropin OS=Mus musculus GN=Gh1 PE=2 SV=1	796.263	599.88	760.915	154.034	155.987	88.783	115.712	107.685	215.003
P07091	Protein S100-A4 OS=Mus musculus GN=S100a4 PE=1 SV=1	332.977	346.598	332.668	391.359	357.617	560.094	335.82	390.702	342.756
P07309	Transthyretin OS=Mus musculus GN=Ttr PE=1 SV=1	394.799	340.34	345.402	392.052	369.538	371.058	399.89	377.605	393.301
P07310	Creatine kinase M-type OS=Mus musculus GN=Ckm PE=1 SV=1	778.198	311.954	286.776	410.896	220.477	388.797	343.343	252.542	257.169
P07356	Annexin A2 OS=Mus musculus GN=Anxa2 PE=1 SV=2	386.072	373.857	360.899	356.427	382.304	376.77	381.776	362.184	385.024
P07724	Serum albumin OS=Mus musculus GN=Alb PE=1 SV=3	549.269	360.265	326.011	346.721	374.058	278.207	393.419	349.551	333.886
P07901	Heat shock protein HSP 90-alpha OS=Mus musculus GN=Hsp90aa1 PE=1 SV=4	386.456	399.695	400.264	336.83	375.654	374.183	352.614	367.711	346.543
P07903	DNA excision repair protein ERCC-1 OS=Mus musculus GN=Ercc1 PE=2 SV=2	339.068	404.801	443.64	308.693	397.848	417.972	361.75	338.446	321.761
P07934	Phosphorylase b kinase gamma catalytic chain, skeletal muscle/heart isoform OS=Mus musculus GN=Phkg1 PE=1 SV=3	418.776	383.323	396.41	347.944	404.1	347.384	353.784	312.688	364.249
P08030	Adenine phosphoribosyltransferase OS=Mus musculus GN=Aprt PE=1 SV=2	410.132	331.918	288.131	323.715	452.657	425.431	449.244	394.766	290.837
P08032	Spectrin alpha chain, erythrocytic 1 OS=Mus musculus GN=Spta1 PE=1 SV=3	410.355	355.077	413.907	331.342	369.508	347.091	394.97	344.669	373.805
P08074	Carbonyl reductase [NADPH] 2 OS=Mus musculus GN=Cbr2 PE=1 SV=1	393.152	262.554	695.32	472.335	292.946	289.565	257.31	312.42	314.041
P08113	Endoplasmin OS=Mus musculus GN=Hsp90b1 PE=1 SV=2	369.072	399.362	392.319	362.511	367.772	386.665	356.681	378.447	343.908
P08122	Collagen alpha-2(IV) chain OS=Mus musculus GN=Col4a2 PE=1 SV=4	328.722	379.981	375.888	344.721	328.543	445.951	451.964	397.615	344.948
P08226	Apolipoprotein E OS=Mus musculus GN=Apoe PE=1 SV=2	358.655	337.776	400.482	368.078	369.963	371.273	385.318	378.699	405.477
P08228	Superoxide dismutase [Cu-Zn] OS=Mus musculus GN=Sod1 PE=1 SV=2	401.002	351.729	380.532	336.787	377.105	371.499	362.42	363.384	405.483
P08249	Malate dehydrogenase, mitochondrial OS=Mus musculus GN=Mdh2 PE=1 SV=3	378.156	367.56	356.485	385.828	382.568	378.818	374.81	367.815	383.535
P08551	Neurofilament light polypeptide OS=Mus musculus GN=Nefl PE=1 SV=5	401.928	363.22	365.879	373.458	408.953	347.312	386.491	335.781	375.818
P08556	GTPase NRas OS=Mus musculus GN=Nras PE=1 SV=1	395.853	381.62	367.496	377.1	370.991	402.759	342.632	378.115	336.892
P08752	Guanine nucleotide-binding protein G(i) subunit alpha-2 OS=Mus musculus GN=Gnai2 PE=1 SV=5	406.217	388.59	346.777	357.591	411.416	375.376	375.958	375.429	312.164
P08775	DNA-directed RNA polymerase II subunit RPB1 OS=Mus musculus GN=Polr2a PE=1 SV=3	402.766	380.877	391.459	373.498	384.306	367.781	341.248	334.777	366.436
P08905	Lysozyme C-2 OS=Mus musculus GN=Lyz2 PE=1 SV=2	381.916	372.726	329.376	365.218	392.238	372.101	408.305	361.218	399.868
P09055	Integrin beta-1 OS=Mus musculus GN=Itgb1 PE=1 SV=1	406.024	312.981	426.65	426.944	386.224	367.316	292.101	351.697	370.914
P09103	Protein disulfide-isomerase OS=Mus musculus GN=P4hb PE=1 SV=2	411.897	416.211	399.75	340.568	377.778	365.616	309.774	369.049	328.937
P09242	Alkaline phosphatase, tissue-nonspecific isozyme OS=Mus musculus GN=Alpl PE=1 SV=2	357.979	348.071	391.305	404.028	354.979	372.909	390.562	400.911	366.071
P09405	Nucleolin OS=Mus musculus GN=Ncl PE=1 SV=2	414.649	355.276	329.899	390.498	435.221	337.294	387.986	356.287	357.186
P09411	Phosphoglycerate kinase 1 OS=Mus musculus GN=Pgk1 PE=1 SV=4	382.226	397.972	375.319	382.479	355.383	375.69	371.001	362.085	365.023
P09470	Angiotensin-converting enzyme OS=Mus musculus GN=Ace PE=1 SV=3	359.002	419.454	585.328	292.882	344.929	310.775	323.12	316.007	334.283
P09528	Ferritin heavy chain OS=Mus musculus GN=Fth1 PE=1 SV=2	402.366	340.507	412.269	414.308	343.292	419.252	351.478	341.667	328.799
P09581	Macrophage colony-stimulating factor 1 receptor OS=Mus musculus GN=Csf1r PE=1 SV=3	352.722	374.095	375.556	380.226	437.386	330.153	380.014	372.368	369.583
P09671	Superoxide dismutase [Mn], mitochondrial OS=Mus musculus GN=Sod2 PE=1 SV=3	419.012	393.173	409.983	319.935	365.072	329.916	372.112	361.509	357.837
P09813	Apolipoprotein A-II OS=Mus musculus GN=Apoa2 PE=1 SV=2	396.81	286.342	220.389	376.041	399.777	402.919	538.847	341.943	483.77
P09925	Surfeit locus protein 1 OS=Mus musculus GN=Surf1 PE=1 SV=3	387.969	360.456	373.479	350.383	403.982	378.449	336.617	373.086	384.372
P09926	Surfeit locus protein 2 OS=Mus musculus GN=Surf2 PE=1 SV=1	343.946	428.607	364.018	433.557	256.669	371.189	397.902	420.431	403.56
P0C027	Diphosphoinositol polyphosphate phosphohydrolase 3-alpha OS=Mus musculus GN=Nudt10 PE=1 SV=1	360.189	399.832	413.995	381.205	351.861	430.294	308.414	385.012	317.119
P0C0A3	Charged multivesicular body protein 6 OS=Mus musculus GN=Chmp6 PE=1 SV=2	402.991	365.336	405.066	367.181	374.924	342.711	384.013	357.032	349.973
P0C0S6	Histone H2A.Z OS=Mus musculus GN=H2afz PE=1 SV=2	406.307	398.855	324.859	343.551	424.209	348.572	412.759	381.007	318.348
P0C192	Leucine-rich repeat-containing protein 4B OS=Mus musculus GN=Lrrc4b PE=1 SV=1	388.273	396.661	395.18	288.169	430.394	379.798	305.849	402.727	324.309
P0C1Q2	Dual 3',5'-cyclic-AMP and -GMP phosphodiesterase 11A OS=Mus musculus GN=Pde11a PE=1 SV=1	480.059	378.383	365.43	334.878	376.427	320.028	375.979	356.381	330.907
P0C5J4	Probable G-protein coupled receptor 52 OS=Mus musculus GN=Gpr52 PE=3 SV=1	265.595	323.058	364.393	436.213	355.284	342.737	421.233	420.725	532.099
P0C605	cGMP-dependent protein kinase 1 OS=Mus musculus GN=Prkg1 PE=1 SV=1	534.787	405.847	462.584	241.608	528.104	328.386	140.552	322.266	200.7
P0C673	Immunoglobulin superfamily member 11 OS=Mus musculus GN=Igsf11 PE=1 SV=1	340.602	382.253	349.593	387.796	301.002	372.388	476.733	371.955	447.104
P0C7L0	WAS/WASL-interacting protein family member 3 OS=Mus musculus GN=Wipf3 PE=1 SV=1	357.054	369.169	427.425	332.493	358.984	435.391	333.376	357.385	372.665
P0C7M9	C-type lectin domain family 2 member L OS=Mus musculus GN=Clec2l PE=1 SV=1	382.266	393.07	341.698	328.114	424.55	397.335	442.706	365.693	286.069
P0C7T6	Ataxin-1-like OS=Mus musculus GN=Atxn1l PE=1 SV=1	377.132	382.271	424.97	362.05	383.462	397.46	257.279	436.143	300.935
P0C8B4	EKC/KEOPS complex subunit GON7 OS=Mus musculus GN=Gon7 PE=3 SV=1	360.146	333.684	355.447	363.818	420.895	269.272	592.727	347.975	376.926
P0C913	Overexpressed in colon carcinoma 1 protein homolog OS=Mus musculus PE=3 SV=1	334.59	387.833	302.615	359.97	391.171	377.578	387.268	499.113	363.929
P0DI97	Neurexin-1-beta OS=Mus musculus GN=Nrxn1 PE=1 SV=1	354.595	392.46	339.886	340.117	352.376	385.514	443.555	413.961	373.037
P0DJF2	Protein PET117 homolog, mitochondrial OS=Mus musculus GN=Pet117 PE=3 SV=1	342.278	418.341	325.508	380.886	346.632	437.553	389.376	370.814	388.517
P0DN34	NADH dehydrogenase [ubiquinone] 1 beta subcomplex subunit 1 OS=Mus musculus GN=Ndufb1 PE=3 SV=1	362.059	373.263	371.4	343.031	354.126	402.038	375.241	366.196	427.021
P10107	Annexin A1 OS=Mus musculus GN=Anxa1 PE=1 SV=2	389.427	351.579	304.972	354.849	381.382	333.953	481.043	329.531	482.238
P10126	Elongation factor 1-alpha 1 OS=Mus musculus GN=Eef1a1 PE=1 SV=3	435.689	353.859	362.252	367.035	407.437	351.81	336.869	348.814	372.278
P10404	MLV-related proviral Env polyprotein OS=Mus musculus PE=1 SV=3	681.642	239.148	412.616	390.981	250.728	236.773	174.976	533.47	315.057
P10493	Nidogen-1 OS=Mus musculus GN=Nid1 PE=1 SV=2	351.269	413.744	362.233	355.049	340.668	415.907	365.514	415.105	356.767
P10518	Delta-aminolevulinic acid dehydratase OS=Mus musculus GN=Alad PE=1 SV=1	402.527	381.513	367.466	351.398	390.488	338.265	387.156	354.371	382.669
P10605	Cathepsin B OS=Mus musculus GN=Ctsb PE=1 SV=2	357.46	315.792	396.106	381.95	427.953	372.483	372.416	379.997	363.808
P10630-2	Isoform 2 of Eukaryotic initiation factor 4A-II OS=Mus musculus GN=Eif4a2	354.412	371.258	352.866	352.884	423.449	380.847	419.934	371.293	351.582
P10637-2	Isoform Tau-A of Microtubule-associated protein tau OS=Mus musculus GN=Mapt	378.436	345.315	370.226	385.022	376.827	402.648	343.292	366.75	399.81
P10637-5	Isoform Tau-D of Microtubule-associated protein tau OS=Mus musculus GN=Mapt	377.967	344.573	369.279	385.376	377.437	403.295	344.061	366.914	400.085
P10639	Thioredoxin OS=Mus musculus GN=Txn PE=1 SV=3	368.515	379.053	326.582	373.671	392.965	449.594	327.145	423.087	327.276
P10649	Glutathione S-transferase Mu 1 OS=Mus musculus GN=Gstm1 PE=1 SV=2	418.398	386.801	358.466	353.086	404.299	318.247	382.988	370.589	355.259
P10711	Transcription elongation factor A protein 1 OS=Mus musculus GN=Tcea1 PE=1 SV=2	401.121	308.495	392.607	408.927	436.25	342.806	311.372	333.755	413.134
P10833	Ras-related protein R-Ras OS=Mus musculus GN=Rras PE=1 SV=1	403.333	387.838	362.19	351.821	371.487	392.06	344.757	384.252	349.778
P10852-2	Isoform 2 of 4F2 cell-surface antigen heavy chain OS=Mus musculus GN=Slc3a2	393.398	374.752	397.315	361.441	364.335	366.377	365.348	363.842	364.739
P10922	Histone H1.0 OS=Mus musculus GN=H1f0 PE=2 SV=4	461.506	363.483	276.276	424.87	420.726	316.703	398.88	352.448	357.913
P11031	Activated RNA polymerase II transcriptional coactivator p15 OS=Mus musculus GN=Sub1 PE=1 SV=3	398.969	418.069	380.392	346.416	349.3	392.401	367.823	384.736	306.837
P11087	Collagen alpha-1(I) chain OS=Mus musculus GN=Col1a1 PE=1 SV=4	384.157	351.509	457.457	331.511	351.287	470.297	303.994	339.251	326.49
P11214	Tissue-type plasminogen activator OS=Mus musculus GN=Plat PE=1 SV=3	448.603	322.899	450.777	336.479	418.475	415.757	268.972	324.752	290.55
P11276	Fibronectin OS=Mus musculus GN=Fn1 PE=1 SV=4	378.268	339.371	441.503	355.55	390.398	354.515	325.25	332.614	421.383
P11352	Glutathione peroxidase 1 OS=Mus musculus GN=Gpx1 PE=1 SV=2	414.829	424.604	364.691	362.151	404.474	355.073	318.109	383.959	300.88
P11404	Fatty acid-binding protein, heart OS=Mus musculus GN=Fabp3 PE=1 SV=5	408.616	394.649	387.915	355.178	401.027	386.73	303.057	352.027	334.55
P11438	Lysosome-associated membrane glycoprotein 1 OS=Mus musculus GN=Lamp1 PE=1 SV=2	498.737	323.923	402.902	312.041	414.412	332.658	358.782	351.175	292.511
P11499	Heat shock protein HSP 90-beta OS=Mus musculus GN=Hsp90ab1 PE=1 SV=3	371.944	393.542	395.679	342.682	387.706	373.43	366.22	367.555	351.422
P11531	Dystrophin OS=Mus musculus GN=Dmd PE=1 SV=3	380.058	370.214	356.771	408.03	364.816	359.312	356.693	379.552	406.038
P11679	Keratin, type II cytoskeletal 8 OS=Mus musculus GN=Krt8 PE=1 SV=4	453.563	307.88	364.67	361.471	405.221	325.335	388.255	295.455	444.36
P11798	Calcium/calmodulin-dependent protein kinase type II subunit alpha OS=Mus musculus GN=Camk2a PE=1 SV=2	379.272	379.329	398.803	360.314	395.674	375.065	348.118	363.886	345.786
P11835	Integrin beta-2 OS=Mus musculus GN=Itgb2 PE=1 SV=2	391.559	372.622	382.712	355.647	349.595	380.776	360.274	371.498	393.724
P11862	Growth arrest-specific protein 2 OS=Mus musculus GN=Gas2 PE=1 SV=1	405.089	390.54	400.14	278.805	453.753	367.202	356.737	348.469	304.718
P11881	Inositol 1,4,5-trisphosphate receptor type 1 OS=Mus musculus GN=Itpr1 PE=1 SV=2	405.882	421.173	314.682	387.441	394.025	299.486	407.95	353.803	395.755
P11881-2	Isoform 2 of Inositol 1,4,5-trisphosphate receptor type 1 OS=Mus musculus GN=Itpr1	405.315	421.296	314.235	388.477	394.007	299.64	408.291	353.776	395.809
P11930	Nucleoside diphosphate-linked moiety X motif 19 OS=Mus musculus GN=Nudt19 PE=1 SV=2	385.866	391.503	356.157	416.695	363.201	359.044	364.274	371.74	369.763
P11983	T-complex protein 1 subunit alpha OS=Mus musculus GN=Tcp1 PE=1 SV=3	416.939	366.716	368.231	367.088	390.505	367.474	372.093	351.883	346.96
P12023	Amyloid beta A4 protein OS=Mus musculus GN=App PE=1 SV=3	319.037	364.527	406.142	389.78	374.843	389.093	377.513	369.848	398.21
P12025	Midkine OS=Mus musculus GN=Mdk PE=2 SV=2	413.913	359.63	368.318	409.539	393.364	376.24	352.484	370.972	307.909
P12382	ATP-dependent 6-phosphofructokinase, liver type OS=Mus musculus GN=Pfkl PE=1 SV=4	353.603	365.739	362.9	379.406	379.208	392.273	376.538	380.155	394.005
P12657	Muscarinic acetylcholine receptor M1 OS=Mus musculus GN=Chrm1 PE=1 SV=2	383.498	310.023	400.423	330.274	400.296	389.26	366.033	388.288	380.71
P12658	Calbindin OS=Mus musculus GN=Calb1 PE=1 SV=2	408.227	382.759	312.273	401.268	454.51	368.377	353.034	353.315	324.709
P12787	Cytochrome c oxidase subunit 5A, mitochondrial OS=Mus musculus GN=Cox5a PE=1 SV=2	353.46	403.277	397.181	323.539	332.827	371.256	377.567	406.686	401.776
P12815	Programmed cell death protein 6 OS=Mus musculus GN=Pdcd6 PE=1 SV=2	351.632	425.317	354.646	361.144	350.053	393.51	416.116	393.919	339.756
P12849	cAMP-dependent protein kinase type I-beta regulatory subunit OS=Mus musculus GN=Prkar1b PE=1 SV=2	366.378	398.641	378.201	363.385	376.57	371.46	383.026	361.368	368.843
P12960	Contactin-1 OS=Mus musculus GN=Cntn1 PE=1 SV=1	396.553	367.003	395.939	366.859	381.446	372.374	358.203	365.077	343.298
P12961	Neuroendocrine protein 7B2 OS=Mus musculus GN=Scg5 PE=1 SV=1	343.172	468.299	500.56	262.255	240.638	329.219	337.844	471.133	377.537
P12970	60S ribosomal protein L7a OS=Mus musculus GN=Rpl7a PE=1 SV=2	409.062	398.472	395.697	337.335	391.591	385.498	302.944	389.662	307.145
P13020	Gelsolin OS=Mus musculus GN=Gsn PE=1 SV=3	420.797	357.704	389.428	374.367	359.315	365.723	368.413	360.023	351.699
P13439	Uridine 5'-monophosphate synthase OS=Mus musculus GN=Umps PE=1 SV=3	313.544	392.083	310.657	420.452	346.415	406.5	420.961	377.254	451.436
P13634	Carbonic anhydrase 1 OS=Mus musculus GN=Ca1 PE=1 SV=4	552.512	307.602	315.051	371.385	355.73	280.273	391.546	388.083	367.127
P13707	Glycerol-3-phosphate dehydrogenase [NAD(+)], cytoplasmic OS=Mus musculus GN=Gpd1 PE=1 SV=3	401.983	380.324	345.568	369.424	401.894	326.04	390.521	343.387	408.355
P13864	DNA (cytosine-5)-methyltransferase 1 OS=Mus musculus GN=Dnmt1 PE=1 SV=5	357.544	391.175	364.074	374.48	389.295	364.078	380.89	397.679	357.458
P14094	Sodium/potassium-transporting ATPase subunit beta-1 OS=Mus musculus GN=Atp1b1 PE=1 SV=1	405.536	412.412	407.02	366.644	370.863	363.113	320.373	367.389	315.161
P14106	Complement C1q subcomponent subunit B OS=Mus musculus GN=C1qb PE=1 SV=2	345.987	331.901	383.864	358.985	410.466	414.525	355.524	387.802	379.568
P14115	60S ribosomal protein L27a OS=Mus musculus GN=Rpl27a PE=1 SV=5	361.875	451.402	407.07	379.324	362.076	412.641	255.491	399.113	303.407
P14131	40S ribosomal protein S16 OS=Mus musculus GN=Rps16 PE=1 SV=4	375.994	399.398	318.643	404.449	383.373	390.441	430.786	372.945	318.263
P14148	60S ribosomal protein L7 OS=Mus musculus GN=Rpl7 PE=1 SV=2	352.155	369.208	417.426	351.076	383.245	385.549	352.593	370.992	373.064
P14152	Malate dehydrogenase, cytoplasmic OS=Mus musculus GN=Mdh1 PE=1 SV=3	417.131	363.593	323.173	367.778	424.61	341.67	431.082	345.417	354.215
P14206	40S ribosomal protein SA OS=Mus musculus GN=Rpsa PE=1 SV=4	362.491	418.655	356.931	364.746	423.7	356.747	369.973	367.394	342.359
P14211	Calreticulin OS=Mus musculus GN=Calr PE=1 SV=1	407.403	366.576	376.389	359.101	426.202	374.092	332.54	356.612	334.426
P14231	Sodium/potassium-transporting ATPase subunit beta-2 OS=Mus musculus GN=Atp1b2 PE=1 SV=2	392.599	384.664	384.013	376.441	390.185	338.879	352.166	352.571	382.177
P14576	Signal recognition particle 54 kDa protein OS=Mus musculus GN=Srp54 PE=1 SV=2	381.151	409.344	370.857	362.568	354.43	403.615	351.556	393.159	330.195
P14602	Heat shock protein beta-1 OS=Mus musculus GN=Hspb1 PE=1 SV=3	412.95	381.622	373.252	322.354	321.182	323.669	384.275	350.499	492.308
P14685	26S proteasome non-ATPase regulatory subunit 3 OS=Mus musculus GN=Psmd3 PE=1 SV=3	374.659	377.437	366.262	335.122	395.077	397.678	380.725	388.125	342.724
P14733	Lamin-B1 OS=Mus musculus GN=Lmnb1 PE=1 SV=3	419.762	374.377	342.111	411.029	364.775	344.758	378.805	368.594	367.41
P14824	Annexin A6 OS=Mus musculus GN=Anxa6 PE=1 SV=3	389.295	386.957	369.713	355.745	364.238	333.163	421.388	354.904	397.728
P14869	60S acidic ribosomal protein P0 OS=Mus musculus GN=Rplp0 PE=1 SV=3	386.094	393	366.852	339.553	401.233	357.299	420.268	360.454	334.897
P14873	Microtubule-associated protein 1B OS=Mus musculus GN=Map1b PE=1 SV=2	397.58	368.265	423.112	355.374	378.083	394.616	326.834	346.972	337.69
P15066	Transcription factor jun-D OS=Mus musculus GN=Jund PE=1 SV=1	400.302	410.189	401.117	344.297	359.203	363.692	324.891	335.178	396.39
P15105	Glutamine synthetase OS=Mus musculus GN=Glul PE=1 SV=6	385.463	381.322	384.966	381.466	388.368	358.856	364.476	371.529	340.629
P15116	Cadherin-2 OS=Mus musculus GN=Cdh2 PE=1 SV=2	386.843	405.741	399.854	364.58	347.949	383.109	356.319	371.301	333.798
P15208	Insulin receptor OS=Mus musculus GN=Insr PE=1 SV=2	384.217	379.902	359.974	363.845	362.674	324.482	451.135	372.466	387.832
P15209	BDNF/NT-3 growth factors receptor OS=Mus musculus GN=Ntrk2 PE=1 SV=1	332.273	377.87	363.765	394.487	353.26	372.866	434.146	391.349	390.587
P15327	Bisphosphoglycerate mutase OS=Mus musculus GN=Bpgm PE=1 SV=2	413.043	349.107	378.461	364.029	347.62	327.146	382.021	347.259	456.866
P15388-3	Isoform 2 of Potassium voltage-gated channel subfamily C member 1 OS=Mus musculus GN=Kcnc1	371.008	386.682	386.016	397.207	367.224	372.021	372.32	362.452	355.992
P15532	Nucleoside diphosphate kinase A OS=Mus musculus GN=Nme1 PE=1 SV=1	402.248	378.918	358.332	355.773	418.415	399.649	336.18	355.225	334.915
P15626	Glutathione S-transferase Mu 2 OS=Mus musculus GN=Gstm2 PE=1 SV=2	423.116	410.651	369.746	368.21	381.399	330.681	385.362	344.567	331.702
P15864	Histone H1.2 OS=Mus musculus GN=Hist1h1c PE=1 SV=2	363.524	376.898	306.31	431.214	374.165	348.663	400.609	375.133	440.699
P16014	Secretogranin-1 OS=Mus musculus GN=Chgb PE=1 SV=2	264.78	320.455	481.383	438.087	377.927	423.372	311.882	370.813	401.357
P16045	Galectin-1 OS=Mus musculus GN=Lgals1 PE=1 SV=3	495.806	381.839	357.611	351.383	327.33	328.55	371.143	328.551	385.16
P16054	Protein kinase C epsilon type OS=Mus musculus GN=Prkce PE=1 SV=1	366.424	368.178	365.706	353.08	405.46	399.072	367.925	375.322	361.971
P16125	L-lactate dehydrogenase B chain OS=Mus musculus GN=Ldhb PE=1 SV=2	386.128	391.231	360.68	372.287	374.677	391.073	371.091	371.603	344.442
P16254	Signal recognition particle 14 kDa protein OS=Mus musculus GN=Srp14 PE=1 SV=1	427.989	424.353	358.706	353.497	376.826	356.398	350.138	348.551	339.104
P16283	Anion exchange protein 3 OS=Mus musculus GN=Slc4a3 PE=1 SV=2	409.411	352.443	319.477	357.053	370.129	335.784	445.328	356.866	443.222
P16301	Phosphatidylcholine-sterol acyltransferase OS=Mus musculus GN=Lcat PE=1 SV=2	419.55	402.097	425.414	414.5	406.668	291.787	363.091	315.949	292.856
P16305	Gamma-aminobutyric acid receptor subunit alpha-6 OS=Mus musculus GN=Gabra6 PE=1 SV=3	376.609	433.53	324.542	359.467	406.009	293.381	481.092	346.955	370.811
P16330	2',3'-cyclic-nucleotide 3'-phosphodiesterase OS=Mus musculus GN=Cnp PE=1 SV=3	414.98	366.138	372.025	360.64	396.816	365.045	346.065	353.042	366.999
P16332	Methylmalonyl-CoA mutase, mitochondrial OS=Mus musculus GN=Mut PE=1 SV=2	410.257	377.245	373.081	358.374	372.009	369.239	373.407	358.725	358.012
P16388	Potassium voltage-gated channel subfamily A member 1 OS=Mus musculus GN=Kcna1 PE=1 SV=1	376.362	394.91	379.584	340.829	424.406	369.602	348.578	377.038	330.898
P16390	Potassium voltage-gated channel subfamily A member 3 OS=Mus musculus GN=Kcna3 PE=1 SV=3	371.691	377.054	363.917	370.409	392.783	356.881	411.974	373.462	358.355
P16406	Glutamyl aminopeptidase OS=Mus musculus GN=Enpep PE=1 SV=1	389.248	394.209	408.372	376.279	340.637	329.645	395.07	352.611	377.162
P16460	Argininosuccinate synthase OS=Mus musculus GN=Ass1 PE=1 SV=1	406.873	379.648	425.344	348.218	403.949	385.944	294.586	357.963	307.049
P16546	Spectrin alpha chain, non-erythrocytic 1 OS=Mus musculus GN=Sptan1 PE=1 SV=4	400.769	366.602	378.4	366.128	400.473	364.852	364.031	356.638	350.842
P16951	Cyclic AMP-dependent transcription factor ATF-2 OS=Mus musculus GN=Atf2 PE=1 SV=2	439.751	395.845	390.655	344.609	416.275	387.311	274.203	339.896	309.103
P17047-2	Isoform LAMP-2B of Lysosome-associated membrane glycoprotein 2 OS=Mus musculus GN=Lamp2	459.492	319.226	487.894	255.157	402.583	416.184	324.543	360.847	227.751
P17095	High mobility group protein HMG-I/HMG-Y OS=Mus musculus GN=Hmga1 PE=1 SV=4	369.716	377.718	393.125	425.569	395.269	358.903	306.368	357.477	377.285
P17095-1	Isoform HMG-Y of High mobility group protein HMG-I/HMG-Y OS=Mus musculus GN=Hmga1	382.878	253.858	400.856	529.538	441.863	359.43	287.149	279.95	444.914
P17156	Heat shock-related 70 kDa protein 2 OS=Mus musculus GN=Hspa2 PE=1 SV=2	341.931	397.725	432.8	364.107	384.875	384.646	352.337	373.435	319.489
P17182	Alpha-enolase OS=Mus musculus GN=Eno1 PE=1 SV=3	422.04	380.55	373.236	358.226	393.564	359.912	352.699	361.785	334.536
P17183	Gamma-enolase OS=Mus musculus GN=Eno2 PE=1 SV=2	455.788	377.006	353.544	347.979	346.538	376.412	379.325	363.151	338.906
P17426	AP-2 complex subunit alpha-1 OS=Mus musculus GN=Ap2a1 PE=1 SV=1	387.84	359.926	374.302	354.933	413.299	388.8	354.941	366.11	348.422
P17427	AP-2 complex subunit alpha-2 OS=Mus musculus GN=Ap2a2 PE=1 SV=2	374.845	371.34	383.908	337.823	395.052	393.973	362.148	373.387	358.704
P17439	Glucosylceramidase OS=Mus musculus GN=Gba PE=1 SV=1	364.168	478.732	446.987	389.718	300.186	345.383	274.285	382.815	357.155
P17563	Selenium-binding protein 1 OS=Mus musculus GN=Selenbp1 PE=1 SV=2	409.486	364.357	346.445	360.711	390.254	345.756	412.236	362.269	375.442
P17665	Cytochrome c oxidase subunit 7C, mitochondrial OS=Mus musculus GN=Cox7c PE=1 SV=1	481.09	325.149	221.303	312.539	712.405	446.636	233.489	350.143	180.073
P17710	Hexokinase-1 OS=Mus musculus GN=Hk1 PE=1 SV=3	405.292	378.92	352.912	355.631	373.666	367.579	398.087	368.234	362.192
P17742	Peptidyl-prolyl cis-trans isomerase A OS=Mus musculus GN=Ppia PE=1 SV=2	393.319	407.928	350.579	408.397	378.994	351.301	375.919	351.951	353.496
P17751	Triosephosphate isomerase OS=Mus musculus GN=Tpi1 PE=1 SV=4	383.483	373.381	373.967	380.381	381.799	373.793	378.712	361.49	358.747
P17809	Solute carrier family 2, facilitated glucose transporter member 1 OS=Mus musculus GN=Slc2a1 PE=1 SV=4	361.093	408.065	396.987	404.913	317.643	341.757	385.843	406.833	361.6
P17879	Heat shock 70 kDa protein 1B OS=Mus musculus GN=Hspa1b PE=1 SV=3	337.329	405.78	384.942	371.851	368.759	416.287	363.308	376.156	349.16
P18242	Cathepsin D OS=Mus musculus GN=Ctsd PE=1 SV=1	382.068	373.513	373.049	367.117	369.948	369.336	391.069	378.49	364.238
P18528	Ig heavy chain V region 6.96 OS=Mus musculus PE=4 SV=1	485.108	318.133	314.845	406.278	409.366	298.685	424.135	365.635	335.924
P18572	Basigin OS=Mus musculus GN=Bsg PE=1 SV=2	387.709	346.938	356.995	370.239	410.9	355.516	369.745	361.315	407.628
P18608	Non-histone chromosomal protein HMG-14 OS=Mus musculus GN=Hmgn1 PE=1 SV=2	514.613	249.076	252.272	467.564	343.604	355.647	419.749	381.304	413.438
P18760	Cofilin-1 OS=Mus musculus GN=Cfl1 PE=1 SV=3	396.849	387.887	370.162	410.213	378.539	378.58	386.74	353.39	302.033
P18872	Guanine nucleotide-binding protein G(o) subunit alpha OS=Mus musculus GN=Gnao1 PE=1 SV=3	369.68	375.832	371.907	375.18	387.913	376.455	382.347	380.283	350.48
P18872-2	Isoform Alpha-2 of Guanine nucleotide-binding protein G(o) subunit alpha OS=Mus musculus GN=Gnao1	373.556	375.127	372.102	372.208	394.529	378.21	375.603	379.294	344.324
P19096	Fatty acid synthase OS=Mus musculus GN=Fasn PE=1 SV=2	364.296	367.454	400.498	377.865	356.82	391.084	364.384	372.953	372.264
P19137	Laminin subunit alpha-1 OS=Mus musculus GN=Lama1 PE=1 SV=1	342.847	374.298	352.265	404.577	345.021	379.144	395.854	390.254	423.964
P19157	Glutathione S-transferase P 1 OS=Mus musculus GN=Gstp1 PE=1 SV=2	360.4	359.354	349.128	371.956	378.912	396.961	389.879	389.418	390.294
P19221	Prothrombin OS=Mus musculus GN=F2 PE=1 SV=1	300.569	384.425	341.304	399.51	431.535	362.701	380.666	334.328	478.244
P19246	Neurofilament heavy polypeptide OS=Mus musculus GN=Nefh PE=1 SV=3	401.837	356.019	367.447	395.817	380.362	352.972	399.713	330.819	386.602
P19324	Serpin H1 OS=Mus musculus GN=Serpinh1 PE=1 SV=3	445.628	353.737	416.494	307.168	367.837	322.747	366.663	329.5	408.402
P19426	Negative elongation factor E OS=Mus musculus GN=Nelfe PE=1 SV=2	375.413	388.653	407.9	375.447	376.875	298.299	344.66	353.782	438.623
P19783	Cytochrome c oxidase subunit 4 isoform 1, mitochondrial OS=Mus musculus GN=Cox4i1 PE=1 SV=2	323.74	391.783	360.274	382.89	337.292	371.445	424.922	389.497	433.184
P20029	78 kDa glucose-regulated protein OS=Mus musculus GN=Hspa5 PE=1 SV=3	390.902	395.386	400.386	366.293	386.209	377.185	338.26	358.787	325.44
P20060	Beta-hexosaminidase subunit beta OS=Mus musculus GN=Hexb PE=1 SV=2	327.968	379.499	384.453	400.796	383.969	393.362	365.882	388.38	362.434
P20065	Thymosin beta-4 OS=Mus musculus GN=Tmsb4x PE=1 SV=1	451.158	387.364	447.091	369.117	412.011	352.76	236.198	332.095	288.313
P20108	Thioredoxin-dependent peroxide reductase, mitochondrial OS=Mus musculus GN=Prdx3 PE=1 SV=1	431.372	346.598	336.81	290.083	498.642	360.943	406.636	334.49	317.305
P20152	Vimentin OS=Mus musculus GN=Vim PE=1 SV=3	405.134	340.347	375.982	357.789	385.348	352.498	387.034	327.427	428.815
P20357	Microtubule-associated protein 2 OS=Mus musculus GN=Map2 PE=1 SV=2	388.99	361.692	404.909	377.144	368.552	419.451	312.323	357.273	351.356
P20491	High affinity immunoglobulin epsilon receptor subunit gamma OS=Mus musculus GN=Fcer1g PE=1 SV=1	480.167	332.175	360.772	391.861	458.647	343.314	286.6	345.706	304.264
P20917-2	Isoform S-MAG of Myelin-associated glycoprotein OS=Mus musculus GN=Mag	390.3	345.05	386.034	391.32	384.091	357.651	381.282	345.941	385.186
P20918	Plasminogen OS=Mus musculus GN=Plg PE=1 SV=3	480.802	351.931	376.156	323.544	371.749	305.739	387.337	328.605	396.631
P20934	Protein EVI2A OS=Mus musculus GN=Evi2a PE=1 SV=2	348.463	285.419	374.524	351.622	353.437	369.649	443.747	425.561	454.563
P21107	Tropomyosin alpha-3 chain OS=Mus musculus GN=Tpm3 PE=1 SV=3	437.281	387.779	400.283	355.92	364.831	379.283	322.859	350.794	318.903
P21107-2	Isoform 2 of Tropomyosin alpha-3 chain OS=Mus musculus GN=Tpm3	404.26	393.489	399.957	367.411	360.711	398.638	325.388	359.121	325.635
P21126	Ubiquitin-like protein 4A OS=Mus musculus GN=Ubl4a PE=1 SV=1	379.776	380.973	382.424	360.211	367.4	368.628	372.164	363.725	387.642
P21278	Guanine nucleotide-binding protein subunit alpha-11 OS=Mus musculus GN=Gna11 PE=1 SV=1	390.391	377.316	329.692	358.587	436.018	401.841	352.672	389.992	316.879
P21279	Guanine nucleotide-binding protein G(q) subunit alpha OS=Mus musculus GN=Gnaq PE=1 SV=4	389.163	384.968	291.117	362.436	469.702	414.159	376.582	380.002	293.965
P21447	Multidrug resistance protein 1A OS=Mus musculus GN=Abcb1a PE=1 SV=3	383.47	357.404	391.801	370.202	387.852	375.431	366.533	355.26	369.044
P21460	Cystatin-C OS=Mus musculus GN=Cst3 PE=1 SV=2	348.213	378.054	381.667	390.697	329.52	435.013	386.39	368.183	370.275
P21550	Beta-enolase OS=Mus musculus GN=Eno3 PE=1 SV=3	450.497	373.61	345.246	389.135	364.247	362.909	370.46	367.112	324.704
P21614	Vitamin D-binding protein OS=Mus musculus GN=Gc PE=1 SV=2	473.125	346.085	353.77	388.123	370.698	297.497	421.829	352.912	347.323
P21661	Neuroendocrine convertase 2 OS=Mus musculus GN=Pcsk2 PE=1 SV=1	387.193	374.179	377.716	339.958	358.625	413.257	401.317	367.296	339.572
P21836	Acetylcholinesterase OS=Mus musculus GN=Ache PE=1 SV=1	360.727	392.086	353.649	417.99	334.159	369.363	366.522	372.908	431.08
P21956	Lactadherin OS=Mus musculus GN=Mfge8 PE=1 SV=3	397.968	331.958	323.946	398.27	357.754	361.498	431.714	363.635	435.364
P21981	Protein-glutamine gamma-glutamyltransferase 2 OS=Mus musculus GN=Tgm2 PE=1 SV=4	371.319	422.371	370.362	376.621	343.667	371.5	337.328	420.76	351.565
P21995	Embigin OS=Mus musculus GN=Emb PE=1 SV=2	372.566	423.831	401.313	388.223	391.573	389.642	292.367	369.758	307.963
P22005	Proenkephalin-A OS=Mus musculus GN=Penk PE=1 SV=2	278.425	367.4	442.868	368.923	382.622	492.886	290.077	427.338	312.347
P22599	Alpha-1-antitrypsin 1-2 OS=Mus musculus GN=Serpina1b PE=1 SV=2	432.569	393.607	389.143	349.719	346.969	317.647	399.856	355.249	359.614
P22682	E3 ubiquitin-protein ligase CBL OS=Mus musculus GN=Cbl PE=1 SV=3	358.931	391.768	378.53	368.429	357.981	410.203	340.032	372.403	389.057
P22723	Gamma-aminobutyric acid receptor subunit gamma-2 OS=Mus musculus GN=Gabrg2 PE=1 SV=3	328.974	362.003	390.145	365.518	410.148	374.99	388.314	353.573	408.066
P22907	Porphobilinogen deaminase OS=Mus musculus GN=Hmbs PE=1 SV=2	359.888	420.602	375.078	298.48	353.71	418.227	325.994	388.611	408.378
P23116	Eukaryotic translation initiation factor 3 subunit A OS=Mus musculus GN=Eif3a PE=1 SV=5	360.495	399.001	374.267	360.391	368.101	388.889	387.04	369.536	364.232
P23198	Chromobox protein homolog 3 OS=Mus musculus GN=Cbx3 PE=1 SV=2	446.47	382.13	392.862	357.804	374.061	331.845	348.31	336.109	355.343
P23242	Gap junction alpha-1 protein OS=Mus musculus GN=Gja1 PE=1 SV=2	334.083	334.689	390.116	456.026	315.566	397.44	350.597	396.973	436.834
P23492	Purine nucleoside phosphorylase OS=Mus musculus GN=Pnp PE=1 SV=2	386.809	387.634	348.672	374.545	382.169	380.627	376.256	391.437	339.445
P23591	GDP-L-fucose synthase OS=Mus musculus GN=Tsta3 PE=1 SV=3	403.052	370.219	336.638	353.706	388.229	355.477	412.544	395.746	353.924
P23780	Beta-galactosidase OS=Mus musculus GN=Glb1 PE=1 SV=1	374.51	394.469	324.591	339.339	398.654	334.003	431.549	399.404	388.163
P23798	Polycomb group RING finger protein 2 OS=Mus musculus GN=Pcgf2 PE=1 SV=2	297.154	498.484	296.759	471.903	355.893	365.873	379.131	422.408	350.277
P23819-3	Isoform 3 of Glutamate receptor 2 OS=Mus musculus GN=Gria2	380.352	377.999	381.113	333.364	412.283	382.715	372.204	370.17	335.905
P23927	Alpha-crystallin B chain OS=Mus musculus GN=Cryab PE=1 SV=2	474.824	306.739	352.12	340.486	381.429	325.964	343.366	320.696	489.827
P23953	Carboxylesterase 1C OS=Mus musculus GN=Ces1c PE=1 SV=4	480.909	394.319	371.254	336.528	345.966	285.039	414.591	360.533	340.719
P24270	Catalase OS=Mus musculus GN=Cat PE=1 SV=4	357.332	368.43	357.451	388.5	359.391	365.913	420.719	380.645	400.5
P24369	Peptidyl-prolyl cis-trans isomerase B OS=Mus musculus GN=Ppib PE=1 SV=2	426.615	391.67	387.446	308.373	420.655	387.397	323.936	364.675	293.77
P24472	Glutathione S-transferase A4 OS=Mus musculus GN=Gsta4 PE=1 SV=3	354.634	379.262	363.114	368.294	368.924	365.144	418.058	371.547	401.728
P24527	Leukotriene A-4 hydrolase OS=Mus musculus GN=Lta4h PE=1 SV=4	399.023	353.454	385.99	336.804	395.989	370.113	359.872	359.747	382.916
P24529	Tyrosine 3-monooxygenase OS=Mus musculus GN=Th PE=1 SV=3	421.968	345.659	391.619	367.582	374.441	365.41	334.971	408.671	326.114
P24547	Inosine-5'-monophosphate dehydrogenase 2 OS=Mus musculus GN=Impdh2 PE=1 SV=2	396.039	367.916	358.454	363.302	414.853	402.45	330.54	377.748	333.335
P24549	Retinal dehydrogenase 1 OS=Mus musculus GN=Aldh1a1 PE=1 SV=5	387.484	383.577	370.201	361.935	399.307	339.955	398.354	360.59	361.31
P24638	Lysosomal acid phosphatase OS=Mus musculus GN=Acp2 PE=1 SV=2	368.901	389.951	408.132	312.328	345.329	392.872	374.919	382.241	376.331
P24668	Cation-dependent mannose-6-phosphate receptor OS=Mus musculus GN=M6pr PE=1 SV=1	361.153	357.991	424.621	344.952	391.933	374.873	359.993	387.522	345.042
P24788	Cyclin-dependent kinase 11B OS=Mus musculus GN=Cdk11b PE=1 SV=2	371.959	375.676	393.052	413.498	327.57	333.669	462.676	344.952	376.413
P25444	40S ribosomal protein S2 OS=Mus musculus GN=Rps2 PE=1 SV=3	339.377	404.434	375.753	377.278	366.631	386.913	396.755	389.692	348.144
P25785	Metalloproteinase inhibitor 2 OS=Mus musculus GN=Timp2 PE=1 SV=2	359.286	342.223	443.383	269.121	430.793	481.181	312.975	375.059	289.929
P25799	Nuclear factor NF-kappa-B p105 subunit OS=Mus musculus GN=Nfkb1 PE=1 SV=2	326.645	336.279	397.349	402.689	353.582	384.003	374.929	375.659	449.652
P25911	Tyrosine-protein kinase Lyn OS=Mus musculus GN=Lyn PE=1 SV=4	388.953	387.348	326.144	392.945	406.364	325.344	429.357	363.612	367.367
P26039	Talin-1 OS=Mus musculus GN=Tln1 PE=1 SV=2	400.937	344.612	366.289	375.456	377.785	357.02	390.16	356.69	399.749
P26040	Ezrin OS=Mus musculus GN=Ezr PE=1 SV=3	380.341	338.611	406.104	360.136	408.061	359.139	351.329	333.303	413.816
P26041	Moesin OS=Mus musculus GN=Msn PE=1 SV=3	348.89	353.623	408.723	383.025	362.418	383.332	368.223	349.439	419.275
P26043	Radixin OS=Mus musculus GN=Rdx PE=1 SV=3	394.986	334.613	396.525	371.581	390.564	367.974	338.922	333.509	422.513
P26048	Gamma-aminobutyric acid receptor subunit alpha-2 OS=Mus musculus GN=Gabra2 PE=1 SV=1	384.222	384.738	390.749	346.335	389.778	388.467	355.239	390.939	312.438
P26231	Catenin alpha-1 OS=Mus musculus GN=Ctnna1 PE=1 SV=1	407.367	385.021	373.151	357.191	401.484	362.402	349.666	382.892	320.3
P26339	Chromogranin-A OS=Mus musculus GN=Chga PE=1 SV=1	298.317	426.732	424.248	372.617	369.663	403.686	369.086	328.226	386.933
P26369	Splicing factor U2AF 65 kDa subunit OS=Mus musculus GN=U2af2 PE=1 SV=3	398.294	371.438	393.208	378.952	364.847	382.44	329.848	386.386	340.8
P26443	Glutamate dehydrogenase 1, mitochondrial OS=Mus musculus GN=Glud1 PE=1 SV=1	428.994	359.834	358.398	380.436	348.248	352.172	380.309	374.357	378.342
[truncated: 5,188 more rows]

## Sheet: Phosphoproteomics
Identifier	Protein	Description	Annotated Sequence	#_Phos_Sites	PhosphoRS: Best Site Probabilities	PepLoc	ProtLoc	FlankSeq	WTvHOM_pvalue	WTvHOM_FC	Kmeans_Cluster	WT_Rep1	WT_Rep2	WT_Rep3	HET_Rep1	HET_Rep2	HET_Rep3	HOM_Rep1	HOM_Rep2	HOM_Rep3	WT_Avg	HET_Avg	HOM_Avg
aHGGHPGSPRGSLsR_S12_1	E9PUL5	Proline-rich transmembrane protein 2 OS=Mus musculus GN=Prrt2 PE=1 SV=1	aHGGHPGSPRGSLsR	1	S12(Phospho): 88.47	S12	S248	HPGSPRGSLSRHPSS	0.0259631	1.46598	1	0.110801	0.0954315	0.136718	0.111845	0.110582	0.0623355	0.148363	0.176178	0.178218	0.114317	0.0949208	0.167586
aHGGHPGsPRGSLSR_S8 S12_1	E9PUL5	Proline-rich transmembrane protein 2 OS=Mus musculus GN=Prrt2 PE=1 SV=1	aHGGHPGsPRGSLSR	1	S8(Phospho): 47.48; S12(Phospho): 47.48	S8	S244	AHGGHPGSPRGSLSR	0.00336692	1.40328	1	0.120459	0.120543	0.124593	0.075092	0.121528	0.0670603	0.184172	0.157305	0.171558	0.121865	0.0878934	0.171011
dNLAQQsFNMEQANYTIQSLkDTk_S7_1	Q9D7S9	Charged multivesicular body protein 5 OS=Mus musculus GN=Chmp5 PE=1 SV=1	dNLAQQsFNMEQANYTIQSLkDTk	1	S7(Phospho): 96.45	S7	S86	RDNLAQQSFNMEQAN	0.0469123	2.19564	1	0.0747393	0.1502	0.0461483	0.048468	0.105607	0.0529402	0.184819	0.168913	0.241478	0.0903627	0.0690051	0.198404
dRNsWGGFSEk_S4_1	Q8BH66	Atlastin-1 OS=Mus musculus GN=Atl1 PE=1 SV=1	dRNsWGGFSEk	1	S4(Phospho): 100	S4	S10	KSRRDRNSWGGFSEK	0.0284872	1.53099	1	0.093945	0.138602	0.0901986	0.118635	0.109013	0.0769554	0.178123	0.154749	0.16125	0.107582	0.101534	0.164707
eMSLYASLASEkVQsLEGEkLsPk_S15 S22_2	P14873	Microtubule-associated protein 1B OS=Mus musculus GN=Map1b PE=1 SV=2	eMSLYASLASEkVQsLEGEkLsPk	2	S15(Phospho): 99.97; S22(Phospho): 100	S15.S22	S1768.S1775	LASEKVQSLEGEKLS.SLEGEKLSPKSDISP	0.00260468	2.00702	1	0.0791949	0.1096	0.0857843	0.103722	0.0971802	0.0882008	0.16437	0.187489	0.199227	0.0915264	0.0963678	0.183695
hkQNSEALIANDELDcsPE_S17_1	Q8BXR1	Probable cationic amino acid transporter OS=Mus musculus GN=Slc7a14 PE=1 SV=1	hkQNSEALIANDELDcsPE	1	S17(Phospho): 100	S17	S769	ANDELDCSPE	0.0363871	1.72528	1	0.0712196	0.145369	0.0896199	0.10739	0.115707	0.0866072	0.163365	0.172286	0.192646	0.10207	0.103235	0.176099
kDscNAEREFLQGATITEASAGNDDIFGLSTDSLSR_S3_1	Q68EF0	Rab-3A-interacting protein OS=Mus musculus GN=Rab3ip PE=1 SV=1	kDscNAEREFLQGATITEASAGNDDIFGLSTDSLSR	1	S3(Phospho): 99.75	S3	S111	KLTSRKDSCNAEREF	0.0233554	1.97067	1	0.088597	0.132613	0.0655925	0.0844926	0.11041	0.0585164	0.218161	0.159312	0.187718	0.0956007	0.0844731	0.188397
mGPSSsPIPsPSPSPTDSkR_S4 S5 S18_2	P63318	Protein kinase C gamma type OS=Mus musculus GN=Prkcg PE=1 SV=1	mGPSSsPIPsPSPSPTDSkR	2	S4(Phospho): 45.3; S5(Phospho): 45.3; S18(Phospho): 72.29	S4.S5.S18	S320.S321.S334	ERVRMGPSSSPIPSP.RVRMGPSSSPIPSPS.PSPSPTDSKRCFFGA	0.0157774	1.61556	1	0.0876811	0.126617	0.0864337	0.129043	0.107297	0.0738937	0.146393	0.168759	0.1707	0.100244	0.103411	0.16195
mGPSSsPIPsPSPSPTDSkR_S6 S10 S12_2	P63318	Protein kinase C gamma type OS=Mus musculus GN=Prkcg PE=1 SV=1	mGPSSsPIPsPSPSPTDSkR	2	S6(Phospho): 88.17; S10(Phospho): 49.94; S12(Phospho): 49.94	S6.S10.S12	S322.S326.S328	VRMGPSSSPIPSPSP.PSSSPIPSPSPSPTD.SSPIPSPSPSPTDSK	0.0044063	1.69929	1	0.0925712	0.118868	0.0897677	0.100053	0.113559	0.0714838	0.184838	0.157952	0.169049	0.100402	0.095032	0.170613
mMkDIsNLEENDETRFILSk_S6_1	Q8BJI1	Sodium-dependent neutral amino acid transporter SLC6A17 OS=Mus musculus GN=Slc6a17 PE=1 SV=1	mMkDIsNLEENDETRFILSk	1	S6(Phospho): 99.91	S6	S665	GRMMKDISNLEENDE	0.0334789	1.87812	1	0.102739	0.132896	0.0472603	0.0897952	0.120191	0.0590444	0.171736	0.168676	0.190902	0.0942988	0.0896767	0.177105
nYNkQAsEQNWANYSAEQNR_S7_1	P23242	Gap junction alpha-1 protein OS=Mus musculus GN=Gja1 PE=1 SV=2	nYNkQAsEQNWANYSAEQNR	1	S7(Phospho): 99.95	S7	S306	RNYNKQASEQNWANY	0.0369336	2.21236	1	0.106882	0.0959728	0.0445455	0.0879341	0.106943	0.065026	0.188573	0.134384	0.22438	0.0824666	0.0866344	0.182446
qTPPASPSPQPIEDRPPSsPIYEDAAPFkAEPSYR_S18_1	Q60598	Src substrate cortactin OS=Mus musculus GN=Cttn PE=1 SV=2	qTPPASPSPQPIEDRPPSsPIYEDAAPFkAEPSYR	1	S18(Phospho): 69.55	S18	S417	PIEDRPPSSPIYEDA	0.0239298	1.52242	1	0.110853	0.122831	0.0810837	0.114298	0.109629	0.097311	0.15066	0.150352	0.178197	0.104923	0.107079	0.159736
sGLAWksEAALDDLQVLPkPQDRk_S7_1	E9Q3M9	RIKEN cDNA 2010300C02 gene OS=Mus musculus GN=2010300C02Rik PE=1 SV=1	sGLAWksEAALDDLQVLPkPQDRk	1	S7(Phospho): 99.98	S7	S828	RSGLAWKSEAALDDL	0.0420122	1.73368	1	0.0710091	0.139282	0.0750269	0.09895	0.112894	0.0700929	0.18032	0.151404	0.162925	0.0951061	0.093979	0.164883
sRsPGTPAGEGsGSPPkWQIGEQEFEALMR_S1 T6 S12 S14_3	F8WGR0	Alpha-adducin OS=Mus musculus GN=Add1 PE=1 SV=1	sRsPGTPAGEGsGSPPkWQIGEQEFEALMR	3	S1(Phospho): 84.05; T6(Phospho): 99.96; S12(Phospho): 50; S14(Phospho): 50	S1.T6.S12.S14	S353.T358.S364.S366	PGKYKAKSRSPGTPA.AKSRSPGTPAGEGSG.GTPAGEGSGSPPKWQ.PAGEGSGSPPKWQIG	0.0253615	1.66138	1	0.0993104	0.125294	0.0785107	0.119711	0.102604	0.0905109	0.190524	0.14342	0.169645	0.101038	0.104275	0.167863
sRSPGTPAGEGsGSPPkWQIGEQEFEALMR_S12 S14_1	F8WGR0	Alpha-adducin OS=Mus musculus GN=Add1 PE=1 SV=1	sRSPGTPAGEGsGSPPkWQIGEQEFEALMR	1	S12(Phospho): 50; S14(Phospho): 50	S12	S364	GTPAGEGSGSPPKWQ	0.0295042	1.52037	1	0.0865844	0.128361	0.103007	0.107804	0.0839215	0.114497	0.138438	0.173377	0.17159	0.105984	0.102074	0.161135
tTNTSLVTsFHksMEHVAPDPTGTER_S9 S13_2	Q9ESK9	RB1-inducible coiled-coil protein 1 OS=Mus musculus GN=Rb1cc1 PE=1 SV=3	tTNTSLVTsFHksMEHVAPDPTGTER	2	S9(Phospho): 93.07; S13(Phospho): 92.83	S9.S13	S257.S261	TNTSLVTSFHKSMEH.LVTSFHKSMEHVAPD	0.0436028	1.57677	1	0.0854033	0.139149	0.0842434	0.0896193	0.112149	0.0774132	0.147858	0.179848	0.159195	0.102932	0.0930605	0.1623
vDNSVEAEVNskssLEDEEEPIRSPWFGAR_S11 S13 S14_3	Q5U4C1	G-protein coupled receptor-associated sorting protein 1 OS=Mus musculus GN=Gprasp1 PE=1 SV=1	vDNSVEAEVNskssLEDEEEPIRSPWFGAR	3	S11(Phospho): 99.88; S13(Phospho): 99.88; S14(Phospho): 99.88	S11.S13.S14	S626.S628.S629	SVEAEVNSKSSLEDE.EAEVNSKSSLEDEEE.AEVNSKSSLEDEEEP	0.0144808	1.80453	1	0.104093	0.116037	0.0639918	0.101329	0.117267	0.0716938	0.182151	0.151771	0.178783	0.0947071	0.0967631	0.170902
aGFQTEDFSLyAcASPktPIQAGGYGGFPVH_S15 T18_2	F6SZ47	Serine/threonine-protein kinase B-raf (Fragment) OS=Mus musculus GN=Braf PE=1 SV=1	aGFQTEDFSLyAcASPktPIQAGGYGGFPVH	2	S15(Phospho): 100; T18(Phospho): 100	S15.T18	S734.T737	FSLYACASPKTPIQA.YACASPKTPIQAGGY	0.0339484	1.78788	1	0.107095	0.1193	0.0554898	0.105666	0.134145	0.0552774	0.188466	0.144438	0.171073	0.0939618	0.0983629	0.167992
tGEPDEEEGTFRsSIR_S13 S14_1	Q9Z239	Phospholemman OS=Mus musculus GN=Fxyd1 PE=1 SV=1	tGEPDEEEGTFRsSIR	1	S13(Phospho): 49.99; S14(Phospho): 49.99	S13	S82	EEEGTFRSSIRRLSS	0.0236641	1.65754	1	0.126408	0.123265	0.0702253	0.089323	0.0804019	0.157561	0.161714	0.184333	0.184197	0.106633	0.109095	0.176748
dRGSsAGFLTLHNAFPk_S5_1	F7CZ64	Voltage-dependent calcium channel gamma subunit OS=Mus musculus GN=Cacng8 PE=1 SV=2	dRGSsAGFLTLHNAFPk	1	S5(Phospho): 96.59	S5	S358	SERDRGSSAGFLTLH	0.760822	1.02273	1	0.130241	0.145041	0.134646	0.0738605	0.107736	0.0801392	0.143819	0.123491	0.151937	0.136643	0.0872452	0.139749
eAEAQAAMEANSEGsLTRPkk_S12 S15_1	P63040	Complexin-1 OS=Mus musculus GN=Cplx1 PE=1 SV=1	eAEAQAAMEANSEGsLTRPkk	1	S12(Phospho): 49.57; S15(Phospho): 49.57	S12	S90	QAAMEANSEGSLTRP	0.411182	0.862585	1	0.117278	0.172374	0.186711	0.0998441	0.0541948	0.0858344	0.13083	0.139872	0.140201	0.158788	0.0799577	0.136968
eIcSLFGEAPQNLsSSR_S14 S15 S16_1	G3UY52	Probable ubiquitin carboxyl-terminal hydrolase FAF-X (Fragment) OS=Mus musculus GN=Usp9x PE=1 SV=1	eIcSLFGEAPQNLsSSR	1	S14(Phospho): 33.33; S15(Phospho): 33.33; S16(Phospho): 33.33	S14	S74	GEAPQNLSSSRFSQS	0.959071	0.995017	1	0.150553	0.140843	0.134756	0.107916	0.0860136	0.0963682	0.139646	0.121251	0.163132	0.142051	0.0967658	0.141343
rRGSGSVDEtLFALPAASEPVIPSSAEk_S6 T10_1	Q99P72	Reticulon-4 OS=Mus musculus GN=Rtn4 PE=1 SV=2	rRGSGSVDEtLFALPAASEPVIPSSAEk	1	S6(Phospho): 46.55; T10(Phospho): 46.55	S6	S167	PKRRGSGSVDETLFA	0.815199	1.01866	1	0.141423	0.123575	0.1558	0.0946354	0.0835318	0.109917	0.134699	0.142613	0.151337	0.140266	0.096028	0.142883
sRsPGTPAGEGsGSPPkWQIGEQEFEALMR_S3 T6 S14_2	F8WGR0	Alpha-adducin OS=Mus musculus GN=Add1 PE=1 SV=1	sRsPGTPAGEGsGSPPkWQIGEQEFEALMR	2	S3(Phospho): 44.79; T6(Phospho): 44.79; S14(Phospho): 81.29	S3.T6.S14	S355.T358.S366	KYKAKSRSPGTPAGE.AKSRSPGTPAGEGSG.PAGEGSGSPPKWQIG	0.0544357	1.17212	1	0.139834	0.114749	0.124207	0.0996427	0.102451	0.10848	0.141343	0.150074	0.152568	0.126263	0.103524	0.147995
sSSLDALGPARkEEEAPFWk_S1 S2 S3_1	Q8C3W1	Uncharacterized protein C1orf198 homolog OS=Mus musculus PE=1 SV=1	sSSLDALGPARkEEEAPFWk	1	S1(Phospho): 33.33; S2(Phospho): 33.33; S3(Phospho): 33.33	S1	S174	KPAQSSRSSSLDALG	0.792007	1.0657	1	0.115238	0.201041	0.131957	0.0894783	0.0588714	0.0642757	0.120502	0.199667	0.157516	0.149412	0.0708751	0.159229
nMGGPYGGGNYGPGGSGGsGGYGGR_S16_1	O88569	Heterogeneous nuclear ribonucleoproteins A2/B1 OS=Mus musculus GN=Hnrnpa2b1 PE=1 SV=2	nMGGPYGGGNYGPGGSGGsGGYGGR	1	S16(Phospho): 80.43	S16	S341	GNYGPGGSGGSGGYG	0.123489	0.945762	1	0.149482	0.138893	0.151809	0.0979269	0.0737397	0.111864	0.14063	0.13825	0.137429	0.146728	0.0945102	0.13877
aEDGPAkEEPkQADVPAAVTDAAATtPAAEDAATk_T25_1	P06837	Neuromodulin OS=Mus musculus GN=Gap43 PE=1 SV=1	aEDGPAkEEPkQADVPAAVTDAAATtPAAEDAATk	1	T25(Phospho): 77.47	T25	T171	AVTDAAATTPAAEDA	0.65436	1.22403	1	0.0591117	0.278062	0.117092	0.117248	0.043497	0.097637	0.15421	0.23561	0.166214	0.151422	0.0861273	0.185344
aFsEDEALAQQDskHWk_S3 S13_2	G3X932	DNA segment, Chr 15, Wayne State University 169, expressed, isoform CRA_a OS=Mus musculus GN=Arhgap39 PE=1 SV=1	aFsEDEALAQQDskHWk	2	S3(Phospho): 100; S13(Phospho): 100	S3.S13	S599.S609	GPVVRAFSEDEALAQ.EALAQQDSKHWKRST	0.332986	1.59011	1	0.0774014	0.189063	0.0325959	0.0821403	0.111959	0.0557333	0.148717	0.170856	0.155965	0.0996868	0.0832774	0.158513
aGEASAEStGAADGAAPEEGEAkkTEAPAAAGPEAk_S8 T9_1	Q91XV3	Brain acid soluble protein 1 OS=Mus musculus GN=Basp1 PE=1 SV=3	aGEASAEStGAADGAAPEEGEAkkTEAPAAAGPEAk	1	S8(Phospho): 49.64; T9(Phospho): 49.64	S8	S131	AGEASAESTGAADGA	0.388971	1.23241	1	0.125312	0.208017	0.104172	0.10092	0.0702105	0.107156	0.20674	0.177964	0.154478	0.145834	0.0927622	0.179727
aGGGRPsSPSPSVVSEkEkEELER_S7_1	Q80TJ1-2	Isoform 2 of Calcium-dependent secretion activator 1 OS=Mus musculus GN=Cadps	aGGGRPsSPSPSVVSEkEkEELER	1	S7(Phospho): 85.48	S7	S88	RAGGGRPSSPSPSVV	0.38439	1.09955	1	0.127082	0.152292	0.110188	0.0963466	0.107724	0.0915132	0.13505	0.152361	0.140932	0.129854	0.098528	0.142781
aGkSGTsTPTTPGsTAITPGTPPsYSSR_S4 T11 T21_3	P20357	Microtubule-associated protein 2 OS=Mus musculus GN=Map2 PE=1 SV=2	aGkSGTsTPTTPGsTAITPGTPPsYSSR	3	S4(Phospho): 80.36; T11(Phospho): 79.51; T21(Phospho): 99.72	S4.T11.T21	S1592.T1599.T1609	PIRRAGKSGTSTPTT.SGTSTPTTPGSTAIT.STAITPGTPPSYSSR	0.128853	1.64295	1	0.0943048	0.17148	0.0546101	0.109014	0.0967231	0.0503577	0.193246	0.156016	0.177129	0.106798	0.0853649	0.175464
aGkSGtSTPTTPGSTAITPGTPPSYSsR_S4 T6 S7 T21_2	P20357	Microtubule-associated protein 2 OS=Mus musculus GN=Map2 PE=1 SV=2	aGkSGtSTPTTPGSTAITPGTPPSYSsR	2	S4(Phospho): 32.05; T6(Phospho): 32.05; S7(Phospho): 32.05; T21(Phospho): 98.29	S4.T6.S7.T21	S1592.T1594.S1595.T1609	PIRRAGKSGTSTPTT.RRAGKSGTSTPTTPG.RAGKSGTSTPTTPGS.STAITPGTPPSYSSR	0.183281	1.41918	1	0.101676	0.173124	0.0773327	0.0837298	0.115558	0.0531285	0.184456	0.148001	0.167283	0.117377	0.0841387	0.16658
aGkSGTSTPTTPGsTAITPGTPPsYSSR_S4 T6 T21_2	P20357	Microtubule-associated protein 2 OS=Mus musculus GN=Map2 PE=1 SV=2	aGkSGTSTPTTPGsTAITPGTPPsYSSR	2	S4(Phospho): 47.36; T6(Phospho): 47.36; T21(Phospho): 99.97	S4.T6.T21	S1592.T1594.T1609	PIRRAGKSGTSTPTT.RRAGKSGTSTPTTPG.STAITPGTPPSYSSR	0.198889	1.54883	1	0.0998879	0.165384	0.0575695	0.100775	0.11022	0.062649	0.161187	0.16502	0.173821	0.107614	0.0912148	0.166676
aGkSGtSTPTTPGSTAITPGTPPSYSsR_S7 T21_2	P20357	Microtubule-associated protein 2 OS=Mus musculus GN=Map2 PE=1 SV=2	aGkSGtSTPTTPGSTAITPGTPPSYSsR	2	S7(Phospho): 78.35; T21(Phospho): 98.22	S7.T21	S1595.T1609	RAGKSGTSTPTTPGS.STAITPGTPPSYSSR	0.128825	1.59542	1	0.0872655	0.168319	0.0636397	0.072364	0.126662	0.0682945	0.183149	0.150651	0.175497	0.106408	0.0891067	0.169766
aGSPLcNsNLQDsEEDVEPPSYHLFREDATLPSLSk_S3 S13_2	Q91YM2	Rho GTPase-activating protein 35 OS=Mus musculus GN=Arhgap35 PE=1 SV=3	aGSPLcNsNLQDsEEDVEPPSYHLFREDATLPSLSk	2	S3(Phospho): 99.92; S13(Phospho): 99.92	S3.S13	S975.S985	FNSPRAGSPLCNSNL.CNSNLQDSEEDVEPP	0.195062	1.6157	1	0.0849756	0.159362	0.0664695	0.0752031	0.0939506	0.0580716	0.109285	0.186317	0.206569	0.103602	0.0757418	0.16739
aHskSLDYLNLDk_S3_1	Q8VEB3	UNC119-binding protein C5orf30 homolog OS=Mus musculus GN=D1Ertd622e PE=2 SV=1	aHskSLDYLNLDk	1	S3(Phospho): 99.58	S3	S165	LKGKRAHSKSLDYLN	0.13588	1.49996	1	0.083383	0.164062	0.0839636	0.0986352	0.114133	0.105567	0.157187	0.190625	0.149287	0.11047	0.106112	0.1657
aLGLEEsPEEEGkAREQEEk_S7_1	A2ARP8	Microtubule-associated protein 1A OS=Mus musculus GN=Map1a PE=1 SV=1	aLGLEEsPEEEGkAREQEEk	1	S7(Phospho): 100	S7	S1844	RALGLEESPEEEGKA	0.0501107	1.37078	1	0.104063	0.126715	0.118948	0.108584	0.0799901	0.100236	0.152637	0.139774	0.186986	0.116575	0.0962701	0.159799
aQALRGPETSsLDLVDIQTQLEkWDDVk_S11_1	D3YYH0	PEX5-related protein OS=Mus musculus GN=Pex5l PE=1 SV=1	aQALRGPETSsLDLVDIQTQLEkWDDVk	1	S11(Phospho): 82.92	S11	S129	LRGPETSSLDLVDIQ	0.13201	1.28514	1	0.123221	0.148938	0.0930634	0.119281	0.0842444	0.0788019	0.154636	0.142222	0.172504	0.121741	0.0941093	0.156454
aQPAPkPEPSFSEyASVQVQRk_S10_1	E0CYM8	Tyrosine-protein phosphatase non-receptor type substrate 1 OS=Mus musculus GN=Sirpa PE=1 SV=1	aQPAPkPEPSFSEyASVQVQRk	1	S10(Phospho): 77.04	S10	S501	PAPKPEPSFSEYASV	0.733141	1.09207	1	0.11249	0.198444	0.0940029	0.0782189	0.0835337	0.0604919	0.167239	0.1295	0.14548	0.134979	0.0740815	0.147406
aQPAPkPEPSFsEYASVQVQRk_S16_1	E0CYM8	Tyrosine-protein phosphatase non-receptor type substrate 1 OS=Mus musculus GN=Sirpa PE=1 SV=1	aQPAPkPEPSFsEYASVQVQRk	1	S16(Phospho): 92.42	S16	S507	PSFSEYASVQVQRK	0.742249	0.895716	1	0.111212	0.22562	0.100193	0.0760885	0.0832929	0.0850438	0.139958	0.121498	0.129994	0.145675	0.081475	0.130483
aSsLNFLNksVEEPVQPGGTGLSDSR_S3 S10_2	Q91YS4	Kinesin light chain 2 OS=Mus musculus GN=Klc2 PE=1 SV=1	aSsLNFLNksVEEPVQPGGTGLSDSR	2	S3(Phospho): 82.99; S10(Phospho): 99.95	S3.S10	S579.S586	SRMKRASSLNFLNKS.SLNFLNKSVEEPVQP	0.135082	1.73281	1	0.10295	0.16128	0.0338863	0.0768605	0.127932	0.0635395	0.188371	0.181249	0.146958	0.0993721	0.0894441	0.172193
aSTAAPVAsPAAPsPGSSGGGGFFSSLSNAVk_S9 S26 S28_2	O88935	Synapsin-1 OS=Mus musculus GN=Syn1 PE=1 SV=2	aSTAAPVAsPAAPsPGSSGGGGFFSSLSNAVk	2	S9(Phospho): 98.01; S26(Phospho): 38.29; S28(Phospho): 38.29	S9.S26.S28	S62.S79.S81	STAAPVASPAAPSPG.GGGGFFSSLSNAVKQ.GGFFSSLSNAVKQTT	0.149616	1.51994	1	0.126025	0.14871	0.0538126	0.0790265	0.12596	0.0372641	0.186984	0.173427	0.138963	0.109516	0.0807501	0.166458
aSTPkEQDLEGAtVVGVPGEEQk_T13_1	A2A5Y6	Microtubule-associated protein OS=Mus musculus GN=Mapt PE=1 SV=1	aSTPkEQDLEGAtVVGVPGEEQk	1	T13(Phospho): 83.55	T13	T315	EQDLEGATVVGVPGE	0.326418	1.40128	1	0.0725442	0.170283	0.0719571	0.105377	0.110689	0.101702	0.144511	0.150367	0.146222	0.104928	0.105923	0.147033
aTSPLIEETPIGsIkDkVk_S13_1	Q8C8R3-2	Isoform 2 of Ankyrin-2 OS=Mus musculus GN=Ank2	aTSPLIEETPIGsIkDkVk	1	S13(Phospho): 99.67	S13	S1760	IEETPIGSIKDKVKA	0.0746727	2.34278	1	0.0524141	0.168339	0.0224959	0.0471734	0.127324	0.024523	0.172015	0.194605	0.203257	0.0810829	0.0663401	0.189959
aTsPLIEETPIGsIkDkVk_T9 S13_2	Q8C8R3-2	Isoform 2 of Ankyrin-2 OS=Mus musculus GN=Ank2	aTsPLIEETPIGsIkDkVk	2	T9(Phospho): 78.24; S13(Phospho): 100	T9.S13	T1756.S1760	TSPLIEETPIGSIKD.IEETPIGSIKDKVKA	0.303248	2.07351	1	0.0338994	0.22892	0.00584653	0.0157769	0.132129	0.0205387	0.205008	0.181587	0.170486	0.0895551	0.0561483	0.185694
aTVAsSSQkFQDLGVk_S5 S6 S7_1	Q80UG5	Septin-9 OS=Mus musculus GN=Sept9 PE=1 SV=1	aTVAsSSQkFQDLGVk	1	S5(Phospho): 33.23; S6(Phospho): 33.23; S7(Phospho): 33.23	S5	S58	LLRATVASSSQKFQD	0.189558	1.80294	1	0.0490908	0.188898	0.0454859	0.0410313	0.134676	0.0532163	0.176487	0.181916	0.152684	0.0944915	0.0763078	0.170362
aTVASSsQkFQDLGVk_S6_1	Q80UG5	Septin-9 OS=Mus musculus GN=Sept9 PE=1 SV=1	aTVASSsQkFQDLGVk	1	S6(Phospho): 84.63	S6	S59	LRATVASSSQKFQDL	0.352405	1.55203	1	0.0768822	0.194525	0.0371243	0.0543691	0.135877	0.0582148	0.151154	0.166572	0.161124	0.102844	0.0828203	0.159617
aVGPASILkEVEDkEsEGEEEDEDEDLSk_S16_1	Q9R020	Zinc finger Ran-binding domain-containing protein 2 OS=Mus musculus GN=Zranb2 PE=1 SV=2	aVGPASILkEVEDkEsEGEEEDEDEDLSk	1	S16(Phospho): 93.34	S16	S153	KEVEDKESEGEEEDE	0.496317	1.18764	1	0.0993447	0.182624	0.0947931	0.100771	0.0836023	0.0755438	0.153641	0.14999	0.143827	0.125587	0.0866391	0.149153
cGsLGNIHHkPGGGQVEVk_S3_1	P10637-2	Isoform Tau-A of Microtubule-associated protein tau OS=Mus musculus GN=Mapt	cGsLGNIHHkPGGGQVEVk	1	S3(Phospho): 100	S3	S313	KVTSKCGSLGNIHHK	0.125206	2.06358	1	0.0520888	0.163763	0.0422618	0.0627662	0.107023	0.0589846	0.141745	0.230064	0.160828	0.0860378	0.076258	0.177546
cIcPSLSYsPAsSPQSSPR_S7 S12 S13_2	Q8C078	Calcium/calmodulin-dependent protein kinase kinase 2 OS=Mus musculus GN=Camkk2 PE=1 SV=2	cIcPSLSYsPAsSPQSSPR	2	S7(Phospho): 71.96; S12(Phospho): 49.2; S13(Phospho): 49.2	S7.S12.S13	S127.S132.S133	RCICPSLSYSPASSP.SLSYSPASSPQSSPR.LSYSPASSPQSSPRM	0.274459	1.39276	1	0.125248	0.161246	0.0500121	0.087887	0.112209	0.0485094	0.179598	0.146915	0.142158	0.112169	0.0828686	0.156224
cIcPSLSYsPAsSPQSSPR_S9 S13_2	Q8C078	Calcium/calmodulin-dependent protein kinase kinase 2 OS=Mus musculus GN=Camkk2 PE=1 SV=2	cIcPSLSYsPAsSPQSSPR	2	S9(Phospho): 76.06; S13(Phospho): 97.33	S9.S13	S129.S133	ICPSLSYSPASSPQS.LSYSPASSPQSSPRM	0.110967	1.48307	1	0.0880088	0.152683	0.0751648	0.0931722	0.112372	0.0638236	0.168466	0.144975	0.154997	0.105285	0.0897893	0.156146
cPsPTMsLPSSWk_S3 S7_2	Q8CC35	Synaptopodin OS=Mus musculus GN=Synpo PE=1 SV=2	cPsPTMsLPSSWk	2	S3(Phospho): 99.62; S7(Phospho): 99.62	S3.S7	S740.S744	AELARCPSPTMSLPS.RCPSPTMSLPSSWKY	0.109329	1.76717	1	0.094389	0.131793	0.0681923	0.0921699	0.0714727	0.0560764	0.118295	0.173856	0.22806	0.0981248	0.0732396	0.173404
dLATDLsLIEVk_S7_1	P20357	Microtubule-associated protein 2 OS=Mus musculus GN=Map2 PE=1 SV=2	dLATDLsLIEVk	1	S7(Phospho): 100	S7	S915	RDLATDLSLIEVKLA	0.190462	1.98772	1	0.0741385	0.208299	0.0202304	0.0450326	0.106944	0.022424	0.255078	0.153147	0.193393	0.100889	0.0581334	0.200539
dLPsPLPTk_S4_1	Q91YQ3	Cold shock domain-containing protein C2 OS=Mus musculus GN=Csdc2 PE=1 SV=2	dLPsPLPTk	1	S4(Phospho): 100	S4	S48	IAPRDLPSPLPTKRT	0.199261	1.52946	1	0.0894556	0.168548	0.0675703	0.0821671	0.0905547	0.0539965	0.123623	0.181818	0.192511	0.108525	0.0755728	0.165984
dLsFLLDkk_S3_1	Q9WTU0	Lysine-specific demethylase PHF2 OS=Mus musculus GN=Phf2 PE=1 SV=2	dLsFLLDkk	1	S3(Phospho): 100	S3	S701	SAPKRDLSFLLDKKE	0.148491	1.67066	1	0.0712073	0.162775	0.0565936	0.0639266	0.109606	0.078236	0.155281	0.189997	0.140174	0.0968586	0.0839228	0.161818
dLTQSPEMSPTTIQVTYLPSsQk_S20 S21_1	Q8R092	Uncharacterized protein C1orf43 homolog OS=Mus musculus PE=2 SV=1	dLTQSPEMSPTTIQVTYLPSsQk	1	S20(Phospho): 50; S21(Phospho): 50	S20	S226	IQVTYLPSSQKSKRP	0.0734922	1.80055	1	0.0652365	0.146985	0.0629238	0.0695647	0.121603	0.0927963	0.144307	0.188393	0.162714	0.0917151	0.0946548	0.165138
dLWPMVSPEDTQSLSFSEESPskETSLDISSk_S26 S30 S31_1	A2ARP8	Microtubule-associated protein 1A OS=Mus musculus GN=Map1a PE=1 SV=1	dLWPMVSPEDTQSLSFSEESPskETSLDISSk	1	S26(Phospho): 33.22; S30(Phospho): 33.22; S31(Phospho): 33.22	S26	S1434	ESPSKETSLDISSKQ	0.133711	1.70504	1	0.0784947	0.165539	0.0509998	0.0755242	0.134321	0.0624869	0.191276	0.165878	0.145889	0.0983446	0.0907772	0.167681
dRPSESDELQTIQEDPTAASGGLDVMAsQkRPSQR_S28_1	F6TYB7	Myelin basic protein (Fragment) OS=Mus musculus GN=Mbp PE=1 SV=1	dRPSESDELQTIQEDPTAASGGLDVMAsQkRPSQR	1	S28(Phospho): 92.33	S28	S40	GGLDVMASQKRPSQR	0.210792	1.35266	1	0.113941	0.1524	0.0823282	0.0648788	0.0817096	0.0921994	0.127178	0.19136	0.153091	0.116223	0.079596	0.15721
dSVPLAPAkAQsPLLPEPLk_S12_1	Q7TSJ2	Microtubule-associated protein 6 OS=Mus musculus GN=Map6 PE=1 SV=2	dSVPLAPAkAQsPLLPEPLk	1	S12(Phospho): 100	S12	S687	LAPAKAQSPLLPEPL	0.640566	1.15407	1	0.0866884	0.202624	0.114323	0.103675	0.0541389	0.0635896	0.120351	0.150661	0.194812	0.134545	0.0738011	0.155275
dTRsLGEEPVGGLGSLLDPAk_S4_1	A0A0A0MQD5	SH3 and multiple ankyrin repeat domains protein 3 OS=Mus musculus GN=Shank3 PE=1 SV=1	dTRsLGEEPVGGLGSLLDPAk	1	S4(Phospho): 92.47	S4	S1585	QLNKDTRSLGEEPVG	0.148629	1.33279	1	0.0823457	0.14708	0.120211	0.0675534	0.104817	0.0729419	0.155644	0.174067	0.136282	0.116545	0.0817707	0.155331
dTSNFDkEFTRQPVELtPTDk_T17_1	P68404	Protein kinase C beta type OS=Mus musculus GN=Prkcb PE=1 SV=4	dTSNFDkEFTRQPVELtPTDk	1	T17(Phospho): 99.94	T17	T642	TRQPVELTPTDKLFI	0.0515869	1.56617	1	0.088288	0.13235	0.1078	0.11853	0.0722987	0.0821909	0.160881	0.145818	0.207691	0.109479	0.0910065	0.171463
eAEAQAAMEANSEGSLtRPkk_S15 T17_1	P63040	Complexin-1 OS=Mus musculus GN=Cplx1 PE=1 SV=1	eAEAQAAMEANSEGSLtRPkk	1	S15(Phospho): 49.7; T17(Phospho): 49.7	S15	S93	MEANSEGSLTRPKKA	0.959368	1.00798	1	0.105882	0.168024	0.167703	0.0944139	0.0464437	0.0906903	0.136222	0.150432	0.158477	0.147203	0.0771826	0.148377
eAGNGcEAIsPVTsPLHLk_S10 T13_2	Q80TF3	Protocadherin-19 OS=Mus musculus GN=Pcdh19 PE=1 SV=3	eAGNGcEAIsPVTsPLHLk	2	S10(Phospho): 86.77; T13(Phospho): 86.77	S10.T13	S1063.T1066	GNGCEAISPVTSPLH.CEAISPVTSPLHLKS	0.0544538	1.47528	1	0.098702	0.143039	0.0865129	0.0798096	0.128664	0.0672296	0.177491	0.147091	0.159683	0.109418	0.0919011	0.161422
eGSLkGHsLAGEEFmGLGLGNLVSGGVDkR_S3 S8_1	A2A5R2	Brefeldin A-inhibited guanine nucleotide-exchange protein 2 OS=Mus musculus GN=Arfgef2 PE=1 SV=1	eGSLkGHsLAGEEFmGLGLGNLVSGGVDkR	1	S3(Phospho): 50; S8(Phospho): 50	S3	S1031	SGREREGSLKGHSLA	0.214083	1.60547	1	0.0519254	0.182245	0.0723937	0.0900239	0.0952021	0.076837	0.153232	0.186051	0.152896	0.102188	0.0873544	0.16406
eksQDGGEFTSTGLALASHQVPPSPLVSTNGPGEEk_S3_1	Q99JP6-2	Isoform 2 of Homer protein homolog 3 OS=Mus musculus GN=Homer3	eksQDGGEFTSTGLALASHQVPPSPLVSTNGPGEEk	1	S3(Phospho): 99.19	S3	S120	ARLAREKSQDGGEFT	0.0530172	1.6142	1	0.0781898	0.135756	0.0719951	0.0944186	0.109147	0.0833315	0.149297	0.167897	0.144371	0.0953136	0.0956325	0.153855
eRPktPPSNLsPIEDAsPTEELRQAAEMEELHR_S8 S11 S17 T19_3	Q9QYX7	Protein piccolo OS=Mus musculus GN=Pclo PE=1 SV=4	eRPktPPSNLsPIEDAsPTEELRQAAEMEELHR	3	S8(Phospho): 81.48; S11(Phospho): 81.48; S17(Phospho): 50.37; T19(Phospho): 50.37	S8.S11.S17.T19	S1763.S1766.S1772.T1774	ERPKTPPSNLSPIED.KTPPSNLSPIEDASP.LSPIEDASPTEELRQ.PIEDASPTEELRQAA	0.647287	1.10342	1	0.121492	0.180707	0.0926642	0.0889363	0.10731	0.0717313	0.163472	0.139946	0.132282	0.131621	0.089326	0.145233
eSFLYRSDsDYDMsPk_S9 S14_2	O89084	cAMP-specific 3',5'-cyclic phosphodiesterase 4A OS=Mus musculus GN=Pde4a PE=1 SV=2	eSFLYRSDsDYDMsPk	2	S9(Phospho): 88.19; S14(Phospho): 99.77	S9.S14	S147.S152	SFLYRSDSDYDMSPK.SDSDYDMSPKTMSRN	0.0740546	1.70673	1	0.127209	0.128376	0.0547623	0.103204	0.118893	0.0640478	0.211816	0.150881	0.166981	0.103449	0.0953818	0.17656
eTkLsTEPsPEFSNYSEIAk_S5 T6 S9_2	Q99P72	Reticulon-4 OS=Mus musculus GN=Rtn4 PE=1 SV=2	eTkLsTEPsPEFSNYSEIAk	2	S5(Phospho): 49.97; T6(Phospho): 49.97; S9(Phospho): 99.99	S5.T6.S9	S686.T687.S690	LIKETKLSTEPSPEF.IKETKLSTEPSPEFS.TKLSTEPSPEFSNYS	0.154624	1.66207	1	0.0705905	0.170558	0.0551778	0.0947362	0.122156	0.056837	0.154503	0.182606	0.155407	0.0987755	0.0912429	0.164172
eTkLsTEPsPEFSNYSEIAkFEk_S5 S9_2	Q99P72	Reticulon-4 OS=Mus musculus GN=Rtn4 PE=1 SV=2	eTkLsTEPsPEFSNYSEIAkFEk	2	S5(Phospho): 85.62; S9(Phospho): 97.27	S5.S9	S686.S690	LIKETKLSTEPSPEF.TKLSTEPSPEFSNYS	0.08579	1.83081	1	0.0856008	0.168085	0.0495077	0.0765317	0.106936	0.0398806	0.2017	0.162408	0.190983	0.101064	0.0744495	0.18503
eTkLsTEPsPEFSNYSEIAkFEk_T6 S9_2	Q99P72	Reticulon-4 OS=Mus musculus GN=Rtn4 PE=1 SV=2	eTkLsTEPsPEFSNYSEIAkFEk	2	T6(Phospho): 82.65; S9(Phospho): 99.48	T6.S9	T687.S690	IKETKLSTEPSPEFS.TKLSTEPSPEFSNYS	0.0657037	1.90683	1	0.0769734	0.165196	0.0524377	0.0823569	0.108291	0.0309351	0.198136	0.169331	0.194298	0.0982023	0.073861	0.187255
fGIHVYQFPEcDsDEDEDFkQQDRELk_S13_1	Q9Z2Q6	Septin-5 OS=Mus musculus GN=Sept5 PE=1 SV=2	fGIHVYQFPEcDsDEDEDFkQQDRELk	1	S13(Phospho): 100	S13	S225	YQFPECDSDEDEDFK	0.161556	1.40314	1	0.0746463	0.159874	0.105862	0.11625	0.0784295	0.0950308	0.140292	0.165921	0.171392	0.113461	0.09657	0.159202
fkksQsIDEIDVGTYk_S4 S6_2	E9Q6L9	Leucine-rich repeat-containing protein 7 OS=Mus musculus GN=Lrrc7 PE=1 SV=1	fkksQsIDEIDVGTYk	2	S4(Phospho): 99.89; S6(Phospho): 99.97	S4.S6	S952.S954	KSNKFKKSQSIDEID.NKFKKSQSIDEIDVG	0.170384	1.64095	1	0.0569512	0.167695	0.0696098	0.0610475	0.112811	0.081593	0.148812	0.188714	0.145333	0.0980852	0.0851504	0.160953
fNLmSDAPGDsPRIHLPLNYPPGsPDLGR_S11 S24_2	F7BJK1	Protocadherin 1 (Fragment) OS=Mus musculus GN=Pcdh1 PE=1 SV=1	fNLmSDAPGDsPRIHLPLNYPPGsPDLGR	2	S11(Phospho): 99.53; S24(Phospho): 99.93	S11.S24	S788.S801	MSDAPGDSPRIHLPL.PLNYPPGSPDLGRHY	0.184698	1.48175	1	0.0932393	0.175673	0.0680384	0.115489	0.101303	0.0566096	0.181073	0.149211	0.168993	0.112317	0.0911338	0.166425
fRGAAssTDSLDTLSNGPEGcVVAAVAAR_S7 T8 S10_2	P19246	Neurofilament heavy polypeptide OS=Mus musculus GN=Nefh PE=1 SV=3	fRGAAssTDSLDTLSNGPEGcVVAAVAAR	2	S7(Phospho): 50; T8(Phospho): 50; S10(Phospho): 94.12	S7.T8.S10	S71.T72.S74	RFRGAASSTDSLDTL.FRGAASSTDSLDTLS.GAASSTDSLDTLSNG	0.165051	1.32553	1	0.142945	0.130157	0.0729827	0.100304	0.109439	0.0796843	0.14468	0.162643	0.151423	0.115362	0.0964757	0.152916
fSsPHQsLLSIR_S2 S3 S7_2	A0A0J9YTW6	Sodium channel protein OS=Mus musculus GN=Scn2a PE=1 SV=1	fSsPHQsLLSIR	2	S2(Phospho): 50; S3(Phospho): 50; S7(Phospho): 99.99	S2.S3.S7	S553.S554.S558	LTYEKRFSSPHQSLL.TYEKRFSSPHQSLLS.RFSSPHQSLLSIRGS	0.181111	2.13527	1	0.05913	0.183206	0.0197729	0.0673488	0.121993	0.030734	0.192561	0.185266	0.181846	0.0873696	0.0733584	0.186558
gEHSSTLPASTPSYTSGTsPTSLSSLEEDSDSSPSRR_S22_1	O88737	Protein bassoon OS=Mus musculus GN=Bsn PE=1 SV=4	gEHSSTLPASTPSYTSGTsPTSLSSLEEDSDSSPSRR	1	S22(Phospho): 76.42	S22	S1008	TSGTSPTSLSSLEED	0.211567	1.47616	1	0.0805758	0.155101	0.0934804	0.0950823	0.0732462	0.0827536	0.11063	0.175483	0.199776	0.109719	0.083694	0.161963
gEHSSTLPASTPSYTSGTSPTSLsSLEEDSDSSPSRR_S24_1	O88737	Protein bassoon OS=Mus musculus GN=Bsn PE=1 SV=4	gEHSSTLPASTPSYTSGTSPTSLsSLEEDSDSSPSRR	1	S24(Phospho): 75.84	S24	S1010	GTSPTSLSSLEEDSD	0.213446	1.46588	1	0.10585	0.158008	0.0780305	0.0855591	0.0731072	0.0624756	0.113106	0.187773	0.200286	0.113963	0.073714	0.167055
gLNSsMDMARLPsPTk_S4 S13_2	F6SEU4	Ras/Rap GTPase-activating protein SynGAP OS=Mus musculus GN=Syngap1 PE=1 SV=2	gLNSsMDMARLPsPTk	2	S4(Phospho): 91.38; S13(Phospho): 91.38	S4.S13	S779.S788	FMARGLNSSMDMARL.MDMARLPSPTKEKPP	0.787301	1.05681	1	0.108289	0.187883	0.112006	0.0789991	0.0840224	0.0674814	0.144742	0.154949	0.131677	0.136059	0.0768343	0.143789
gLNSsMDMARLPsPTk_S4 S5 S13_2	F6SEU4	Ras/Rap GTPase-activating protein SynGAP OS=Mus musculus GN=Syngap1 PE=1 SV=2	gLNSsMDMARLPsPTk	2	S4(Phospho): 50.01; S5(Phospho): 50.01; S13(Phospho): 97.27	S4.S5.S13	S779.S780.S788	FMARGLNSSMDMARL.MARGLNSSMDMARLP.MDMARLPSPTKEKPP	0.585898	0.881885	1	0.119224	0.203492	0.124524	0.0902733	0.0822368	0.0683765	0.128056	0.14005	0.126307	0.14908	0.0802955	0.131471
gLYDGPVcEVSVtPkTVTPAssAkTsPAk_T13 T18 S22 T25 S26_4	O08553	Dihydropyrimidinase-related protein 2 OS=Mus musculus GN=Dpysl2 PE=1 SV=2	gLYDGPVcEVSVtPkTVTPAssAkTsPAk	4	T13(Phospho): 93.32; T18(Phospho): 93.8; S22(Phospho): 83.62; T25(Phospho): 50.64; S26(Phospho): 50.64	T13.T18.S22.T25.S26	T509.T514.S518.T521.S522	PVCEVSVTPKTVTPA.SVTPKTVTPASSAKT.KTVTPASSAKTSPAK.TPASSAKTSPAKQQA.PASSAKTSPAKQQAP	0.150856	1.58172	1	0.0656804	0.155724	0.0815774	0.0766096	0.0848356	0.100004	0.141942	0.141343	0.195948	0.100994	0.0871498	0.159744
hFIsGDEPkEkLELVSYFGk_S4_1	P16330	2',3'-cyclic-nucleotide 3'-phosphodiesterase OS=Mus musculus GN=Cnp PE=1 SV=3	hFIsGDEPkEkLELVSYFGk	1	S4(Phospho): 99.99	S4	S227	KELRHFISGDEPKEK	0.297226	1.39624	1	0.040163	0.159774	0.139018	0.117579	0.0975855	0.0698377	0.169681	0.153019	0.150564	0.112985	0.0950007	0.157755
hLPVsPGkTEkQPPIsPTSk_S5 S16_2	Q8C8R3-2	Isoform 2 of Ankyrin-2 OS=Mus musculus GN=Ank2	hLPVsPGkTEkQPPIsPTSk	2	S5(Phospho): 99.99; S16(Phospho): 79.62	S5.S16	S1953.S1964	HEKHLPVSPGKTEKQ.TEKQPPISPTSKTER	0.330371	1.41996	1	0.0584371	0.190285	0.0868311	0.0930933	0.0880602	0.0538714	0.130982	0.174854	0.170636	0.111851	0.0783416	0.158824
hSLGQEVIGIGGsQDESEVPVRER_S13_1	P58871	182 kDa tankyrase-1-binding protein OS=Mus musculus GN=Tnks1bp1 PE=1 SV=2	hSLGQEVIGIGGsQDESEVPVRER	1	S13(Phospho): 100	S13	S807	EVIGIGGSQDESEVP	0.404671	1.34585	1	0.093063	0.192293	0.0652324	0.0715089	0.111392	0.0554314	0.150567	0.156057	0.165215	0.116863	0.079444	0.15728
hSNLMLEDLDksQEEIkk_S12_1	A2A841	Protein 4.1 OS=Mus musculus GN=Epb41 PE=1 SV=1	hSNLMLEDLDksQEEIkk	1	S12(Phospho): 96.59	S12	S679	MLEDLDKSQEEIKKH	0.226907	1.64845	1	0.0303162	0.163927	0.109563	0.0775272	0.103668	0.0679093	0.1182	0.199205	0.183406	0.101269	0.0830349	0.166937
hSYIDTIPQSSRsPSYR_S13_1	A0A0G2JGW6	Cyclin-dependent kinase-like 5 OS=Mus musculus GN=Cdkl5 PE=1 SV=1	hSYIDTIPQSSRsPSYR	1	S13(Phospho): 82.94	S13	S479	TIPQSSRSPSYRTKA	0.116692	1.43937	1	0.0749169	0.152099	0.0961828	0.0860606	0.122876	0.0664929	0.154148	0.14564	0.165414	0.107733	0.0918099	0.155067
hSYsLGFADGR_S4_1	O88737	Protein bassoon OS=Mus musculus GN=Bsn PE=1 SV=4	hSYsLGFADGR	1	S4(Phospho): 99.98	S4	S2029	SSLKHSYSLGFADGR	0.142713	1.72122	1	0.0627874	0.167508	0.0606386	0.076105	0.133883	0.0537829	0.176165	0.187392	0.137204	0.0969779	0.0879236	0.166921
hTPEAGGSGQRQPAGAWAsIk_S19_1	H3BIV5	A-kinase anchor protein 5 OS=Mus musculus GN=Akap5 PE=1 SV=1	hTPEAGGSGQRQPAGAWAsIk	1	S19(Phospho): 99.06	S19	S86	QPAGAWASIKGLVTH	0.192535	1.72637	1	0.063072	0.181385	0.0654148	0.0838619	0.105375	0.0476568	0.183545	0.167164	0.184246	0.103291	0.0789645	0.178318
iAkTPsPPEEPsPLPsPTAsPNHTLAPASPAPVRPR_S6 S12 S16 S20_4	A0A0G2JEG8	Amphiphysin OS=Mus musculus GN=Amph PE=1 SV=1	iAkTPsPPEEPsPLPsPTAsPNHTLAPASPAPVRPR	4	S6(Phospho): 99.96; S12(Phospho): 100; S16(Phospho): 88.21; S20(Phospho): 99.72	S6.S12.S16.S20	S262.S268.S272.S276	LRIAKTPSPPEEPSP.PSPPEEPSPLPSPTA.EEPSPLPSPTASPNH.PLPSPTASPNHTLAP	0.478282	1.18133	1	0.111174	0.177678	0.0900045	0.109951	0.0964518	0.060225	0.144	0.14625	0.157303	0.126286	0.0888759	0.149184
iAkTPsPPEEPsPLPsPTAsPNHTLAPASPAPVRPR_T4 S6 S12 T18_4	A0A0G2JEG8	Amphiphysin OS=Mus musculus GN=Amph PE=1 SV=1	iAkTPsPPEEPsPLPsPTAsPNHTLAPASPAPVRPR	4	T4(Phospho): 99.94; S6(Phospho): 99.94; S12(Phospho): 84.3; T18(Phospho): 72.43	T4.S6.S12.T18	T260.S262.S268.T274	GPLRIAKTPSPPEEP.LRIAKTPSPPEEPSP.PSPPEEPSPLPSPTA.PSPLPSPTASPNHTL	0.328673	1.41167	1	0.106349	0.185875	0.044811	0.100839	0.11524	0.0339402	0.155041	0.17391	0.146832	0.112345	0.0833397	0.158595
iAkTPsPPEEPsPLPsPTASPNHTLAPASPAPVRPR_T4 S6 S16_3	A0A0G2JEG8	Amphiphysin OS=Mus musculus GN=Amph PE=1 SV=1	iAkTPsPPEEPsPLPsPTASPNHTLAPASPAPVRPR	3	T4(Phospho): 100; S6(Phospho): 100; S16(Phospho): 70.89	T4.S6.S16	T260.S262.S272	GPLRIAKTPSPPEEP.LRIAKTPSPPEEPSP.EEPSPLPSPTASPNH	0.480057	1.30984	1	0.0861358	0.201643	0.0659932	0.0916474	0.0806164	0.069748	0.129756	0.195134	0.138495	0.117924	0.0806706	0.154462
iGsTTNPFLDIPHDPNAAVYk_S3 T4_1	E9PUC5	PH and SEC7 domain-containing protein 3 OS=Mus musculus GN=Psd3 PE=1 SV=1	iGsTTNPFLDIPHDPNAAVYk	1	S3(Phospho): 49.82; T4(Phospho): 49.82	S3	S98	KTISRIGSTTNPFLD	0.0502728	2.43198	1	0.0511259	0.158363	0.0299284	0.0386466	0.110427	0.0537873	0.176337	0.191775	0.214144	0.0798056	0.0676204	0.194085
iktFDELEQEAk_T3_1	Q8C8R3-2	Isoform 2 of Ankyrin-2 OS=Mus musculus GN=Ank2	iktFDELEQEAk	1	T3(Phospho): 100	T3	T2584	KMVTKIKTFDELEQE	0.191433	1.86396	1	0.0424671	0.188151	0.0437116	0.0569099	0.129134	0.0442063	0.152433	0.197768	0.161139	0.0914433	0.0767499	0.170447
iSPcSTLTSSTAsPPAsSPcSTLPPVSTNAAAk_S13 S17 S18_2	A2A690-2	Isoform 2 of Protein TANC2 OS=Mus musculus GN=Tanc2	iSPcSTLTSSTAsPPAsSPcSTLPPVSTNAAAk	2	S13(Phospho): 91.25; S17(Phospho): 47.97; S18(Phospho): 47.97	S13.S17.S18	S140.S144.S145	TLTSSTASPPASSPC.STASPPASSPCSTLP.TASPPASSPCSTLPP	0.757608	1.05377	1	0.17002	0.138811	0.0970501	0.108996	0.085623	0.0777029	0.134363	0.154568	0.138773	0.135294	0.0907738	0.142568
kGPPVPPLPkVtPTk_T12 T14_1	A0A0G2JEG8	Amphiphysin OS=Mus musculus GN=Amph PE=1 SV=1	kGPPVPPLPkVtPTk	1	T12(Phospho): 50; T14(Phospho): 50	T12	T310	VPPLPKVTPTKELKQ	0.360112	1.48114	1	0.0666433	0.198367	0.0520129	0.0837108	0.107327	0.068056	0.139465	0.188648	0.141442	0.105674	0.0863646	0.156518
kkSQsVDITAPGFNPLGGAGk_S5_1	Q4KMM3	Oxidation resistance protein 1 OS=Mus musculus GN=Oxr1 PE=1 SV=3	kkSQsVDITAPGFNPLGGAGk	1	S5(Phospho): 99.97	S5	S15	WLKKKSQSVDITAPG	0.495645	1.19521	1	0.0997807	0.185089	0.0842939	0.0855929	0.108049	0.0820347	0.160741	0.13898	0.141506	0.123055	0.0918922	0.147076
kLSTTGssDGGVPVAPPPAVPSSGLPASVMTNIR_S7 S8_2	E9QLZ1	TSC22 domain family protein 1 OS=Mus musculus GN=Tsc22d1 PE=1 SV=1	kLSTTGssDGGVPVAPPPAVPSSGLPASVMTNIR	2	S7(Phospho): 92.22; S8(Phospho): 92.22	S7.S8	S267.S268	RKLSTTGSSDGGVPV.KLSTTGSSDGGVPVA	0.227693	1.71086	1	0.0897382	0.196294	0.0289216	0.066907	0.128283	0.0318435	0.216829	0.166435	0.155577	0.104984	0.0756778	0.179614
kQAEDTISNASSQLSsPPTsPQsSPR_S16 T19 S23 S24_3	A0A0A6YWG7	Rap guanine nucleotide exchange factor 2 OS=Mus musculus GN=Rapgef2 PE=1 SV=1	kQAEDTISNASSQLSsPPTsPQsSPR	3	S16(Phospho): 86.82; T19(Phospho): 86.7; S23(Phospho): 49.48; S24(Phospho): 49.48	S16.T19.S23.S24	S1263.T1266.S1270.S1271	NASSQLSSPPTSPQS.SQLSSPPTSPQSSPR.SPPTSPQSSPRKGYA.PPTSPQSSPRKGYAL	0.180851	1.14412	1	0.146484	0.114366	0.117412	0.106707	0.106149	0.101719	0.153475	0.139298	0.140005	0.126087	0.104859	0.144259
kQsESSFITGDINSSASLNR_S3_1	D3Z5M6	Adhesion G protein-coupled receptor L3 OS=Mus musculus GN=Adgrl3 PE=1 SV=1	kQsESSFITGDINSSASLNR	1	S3(Phospho): 96.69	S3	S1254	NDTVRKQSESSFITG	0.402245	1.12137	1	0.153165	0.129224	0.10529	0.0781676	0.103424	0.082951	0.142457	0.162407	0.129867	0.129227	0.088181	0.14491
kTSkVGEGFEEtLGEAVISTk_T12_1	P46660	Alpha-internexin OS=Mus musculus GN=Ina PE=1 SV=3	kTSkVGEGFEEtLGEAVISTk	1	T12(Phospho): 99.99	T12	T475	VGEGFEETLGEAVIS	0.0503758	1.58557	1	0.0789225	0.138494	0.0857021	0.0875709	0.111634	0.0896928	0.162874	0.176207	0.141534	0.10104	0.0962994	0.160205
kVDPPTTVEPVSLGkADSAsPsPR_S18 S20 S22_2	Q3UNH4	G protein-regulated inducer of neurite outgrowth 1 OS=Mus musculus GN=Gprin1 PE=1 SV=2	kVDPPTTVEPVSLGkADSAsPsPR	2	S18(Phospho): 50.75; S20(Phospho): 50.75; S22(Phospho): 98.41	S18.S20.S22	S618.S620.S622	VSLGKADSASPSPRK.LGKADSASPSPRKAE.KADSASPSPRKAESQ	0.63189	1.08218	1	0.13324	0.165886	0.0980782	0.0964251	0.101462	0.0873725	0.150836	0.150976	0.128033	0.132401	0.0950866	0.143282
lEkEPEEGMRESITSAVVsLPGsPAPSPR_S19 S23_2	Q9JL04	Formin-2 OS=Mus musculus GN=Fmn2 PE=1 SV=2	lEkEPEEGMRESITSAVVsLPGsPAPSPR	2	S19(Phospho): 99.95; S23(Phospho): 99.34	S19.S23	S373.S377	SITSAVVSLPGSPAP.AVVSLPGSPAPSPRC	0.533883	1.25088	1	0.145515	0.193241	0.0466517	0.0990145	0.0875656	0.0263136	0.16367	0.15037	0.168057	0.128469	0.0709645	0.160699
lGAGALNPGSyASLEDTSDkMDGTASDDGRVR_S10 Y11 S13_1	F7DCH5	CLIP-associating protein 2 OS=Mus musculus GN=Clasp2 PE=1 SV=1	lGAGALNPGSyASLEDTSDkMDGTASDDGRVR	1	S10(Phospho): 32.89; Y11(Phospho): 32.89; S13(Phospho): 32.89	S10	S410	AGALNPGSYASLEDT	0.0614584	1.2872	1	0.126757	0.132646	0.0935527	0.0951145	0.115285	0.0770596	0.159813	0.151566	0.142945	0.117652	0.0958199	0.151441
lGAGALNPGsYAsLEDTSDkMDGTASDDGRVR_S10 Y11_2	F7DCH5	CLIP-associating protein 2 OS=Mus musculus GN=Clasp2 PE=1 SV=1	lGAGALNPGsYAsLEDTSDkMDGTASDDGRVR	2	S10(Phospho): 71.44; Y11(Phospho): 49.48	S10.Y11	S410.Y411	AGALNPGSYASLEDT.GALNPGSYASLEDTS	0.132972	1.74344	1	0.0893873	0.167755	0.0388375	0.0801622	0.107083	0.0451362	0.187849	0.1763	0.151875	0.0986598	0.0774604	0.172008
lGAGALNPGSyASLEDTSDkmDGTASDDGRVR_S10_1	F7DCH5	CLIP-associating protein 2 OS=Mus musculus GN=Clasp2 PE=1 SV=1	lGAGALNPGSyASLEDTSDkmDGTASDDGRVR	1	S10(Phospho): 82.47	S10	S410	AGALNPGSYASLEDT	0.268393	1.41466	1	0.104298	0.160242	0.0583711	0.0952846	0.0896688	0.11327	0.147835	0.157046	0.151929	0.107637	0.099408	0.15227
lIEGVHPGsLVEkLPDsPALAk_S9 S17_2	A0A1B0GRA5	Stromal interaction molecule 1 OS=Mus musculus GN=Stim1 PE=1 SV=1	lIEGVHPGsLVEkLPDsPALAk	2	S9(Phospho): 100; S17(Phospho): 100	S9.S17	S675.S683	IEGVHPGSLVEKLPD.LVEKLPDSPALAKKT	0.20149	1.91823	1	0.0635537	0.196423	0.0204982	0.0632926	0.129414	0.0258578	0.180906	0.211286	0.145823	0.0934917	0.0728548	0.179338
lIEGVHPGsLVEkLPDsPALAkk_S9 S17_2	A0A1B0GRA5	Stromal interaction molecule 1 OS=Mus musculus GN=Stim1 PE=1 SV=1	lIEGVHPGsLVEkLPDsPALAkk	2	S9(Phospho): 100; S17(Phospho): 100	S9.S17	S675.S683	IEGVHPGSLVEKLPD.LVEKLPDSPALAKKT	0.167421	2.08815	1	0.0617039	0.201123	0.0138324	0.0526561	0.109402	0.0130573	0.198558	0.223558	0.155589	0.0922197	0.0583718	0.192568
lIYFEDEQPPtLsPkkk_T11 S13_2	Q08460-2	Isoform 2 of Calcium-activated potassium channel subunit alpha-1 OS=Mus musculus GN=Kcnma1	lIYFEDEQPPtLsPkkk	2	T11(Phospho): 100; S13(Phospho): 100	T11.S13	T670.S672	FEDEQPPTLSPKKKQ.DEQPPTLSPKKKQRN	0.273178	1.42349	1	0.0852039	0.166958	0.068712	0.0810693	0.090789	0.0947926	0.148205	0.16118	0.147374	0.106958	0.0888836	0.152253
lRDDkTGVIQTSTEQsFSk_S16_1	P20357	Microtubule-associated protein 2 OS=Mus musculus GN=Map2 PE=1 SV=2	lRDDkTGVIQTSTEQsFSk	1	S16(Phospho): 87.71	S16	S476	IQTSTEQSFSKEDQK	0.84018	0.936067	1	0.10325	0.244295	0.121615	0.0612626	0.0483481	0.0645204	0.121034	0.16987	0.148261	0.156386	0.0580437	0.146388
ltQDSRMESPIPILPLPtPDAETEk_T2 S5 T18_2	Q9Z2Q6	Septin-5 OS=Mus musculus GN=Sept5 PE=1 SV=2	ltQDSRMESPIPILPLPtPDAETEk	2	T2(Phospho): 46.87; S5(Phospho): 46.87; T18(Phospho): 99.99	T2.S5.T18	T320.S323.T336	QQMTSKLTQDSRMES.TSKLTQDSRMESPIP.IPILPLPTPDAETEK	0.219776	1.53734	1	0.0855897	0.190025	0.0605233	0.102621	0.0784145	0.0556801	0.196112	0.158505	0.162139	0.112046	0.0789052	0.172252
mFsFkAPTIDIRPR_S3_1	P22723	Gamma-aminobutyric acid receptor subunit gamma-2 OS=Mus musculus GN=Gabrg2 PE=1 SV=3	mFsFkAPTIDIRPR	1	S3(Phospho): 100	S3	S381	NPLLRMFSFKAPTID	0.111954	1.56954	1	0.0915143	0.150845	0.0665523	0.0802241	0.0945798	0.0777323	0.141398	0.189544	0.153907	0.10297	0.0841787	0.161616
mGPSSsPIPsPSPSPTDSkR_S14 T16_2	P63318	Protein kinase C gamma type OS=Mus musculus GN=Prkcg PE=1 SV=1	mGPSSsPIPsPSPSPTDSkR	2	S14(Phospho): 62.65; T16(Phospho): 55.6	S14.T16	S330.T332	PIPSPSPSPTDSKRC.PSPSPSPTDSKRCFF	0.155426	1.39902	1	0.0924801	0.161264	0.0858742	0.113917	0.102956	0.0379812	0.144422	0.176074	0.154637	0.113206	0.0849513	0.158378
mGPSSsPIPsPsPSPTDSkR_S4 S10 S14_3	P63318	Protein kinase C gamma type OS=Mus musculus GN=Prkcg PE=1 SV=1	mGPSSsPIPsPsPSPTDSkR	3	S4(Phospho): 84.15; S10(Phospho): 99.05; S14(Phospho): 99.05	S4.S10.S14	S320.S326.S330	ERVRMGPSSSPIPSP.PSSSPIPSPSPSPTD.PIPSPSPSPTDSKRC	0.0786984	1.93762	1	0.0810027	0.155807	0.0344428	0.0918038	0.114456	0.0448674	0.169172	0.18984	0.166571	0.0904175	0.083709	0.175194
mGQAGSTIsNsHAQPFDFPDDSQNAk_S6 T7_2	P23242	Gap junction alpha-1 protein OS=Mus musculus GN=Gja1 PE=1 SV=2	mGQAGSTIsNsHAQPFDFPDDSQNAk	2	S6(Phospho): 86.7; T7(Phospho): 86.7	S6.T7	S325.T326	NRMGQAGSTISNSHA.RMGQAGSTISNSHAQ	0.312913	1.29577	1	0.180427	0.100515	0.0823788	0.084635	0.0989444	0.0872992	0.169139	0.143118	0.158525	0.121107	0.0902929	0.156927
mGQAGsTIsNSHAQPFDFPDDSQNAkk_S6 T7 S9 S11_2	P23242	Gap junction alpha-1 protein OS=Mus musculus GN=Gja1 PE=1 SV=2	mGQAGsTIsNSHAQPFDFPDDSQNAkk	2	S6(Phospho): 49.99; T7(Phospho): 49.99; S9(Phospho): 49.99; S11(Phospho): 49.99	S6.T7.S9.S11	S325.T326.S328.S330	NRMGQAGSTISNSHA.RMGQAGSTISNSHAQ.GQAGSTISNSHAQPF.AGSTISNSHAQPFDF	0.486135	1.27327	1	0.208256	0.095525	0.0721314	0.091417	0.0792028	0.08638	0.165766	0.130724	0.182148	0.125304	0.0856666	0.159546
mGQAGsTIsNSHAQPFDFPDDSQNAkk_S9 S11_2	P23242	Gap junction alpha-1 protein OS=Mus musculus GN=Gja1 PE=1 SV=2	mGQAGsTIsNSHAQPFDFPDDSQNAkk	2	S9(Phospho): 82.95; S11(Phospho): 95.32	S9.S11	S328.S330	GQAGSTISNSHAQPF.AGSTISNSHAQPFDF	0.114913	1.4436	1	0.149795	0.0984783	0.0938211	0.096368	0.0937994	0.0637102	0.171697	0.131086	0.191065	0.114031	0.0846258	0.164616
mLSRDssQEYTDSTGIDLHEFLVNTLk_S3 S6 S7_2	Q80TM6	R3H domain-containing protein 2 OS=Mus musculus GN=R3hdm2 PE=1 SV=2	mLSRDssQEYTDSTGIDLHEFLVNTLk	2	S3(Phospho): 99.05; S6(Phospho): 50.39; S7(Phospho): 50.39	S3.S6.S7	S139.S142.S143	KVPRKMLSRDSSQEY.RKMLSRDSSQEYTDS.KMLSRDSSQEYTDST	0.173885	1.46693	1	0.118636	0.139278	0.075742	0.0573947	0.110119	0.0655511	0.200618	0.173763	0.115068	0.111219	0.0776884	0.16315
mQVPTAEEMSSLTPEssPELAkR_T13 S16_2	Q5RJI5	Serine/threonine-protein kinase BRSK1 OS=Mus musculus GN=Brsk1 PE=1 SV=1	mQVPTAEEMSSLTPEssPELAkR	2	T13(Phospho): 99.99; S16(Phospho): 93.05	T13.S16	T583.S586	AEEMSSLTPESSPEL.MSSLTPESSPELAKR	0.209036	1.49332	1	0.115712	0.155076	0.0641227	0.0825264	0.110574	0.0607911	0.218096	0.14339	0.13864	0.111637	0.0846304	0.166709
nAAGEAGLPVTPGSGPWGsAAsLGR_S19 S22_2	A0A0N4SVB5	Proline-rich transmembrane protein 3 OS=Mus musculus GN=Prrt3 PE=1 SV=1	nAAGEAGLPVTPGSGPWGsAAsLGR	2	S19(Phospho): 100; S22(Phospho): 100	S19.S22	S766.S769	PGSGPWGSAASLGRG.GPWGSAASLGRGRPG	0.113978	1.83077	1	0.091738	0.157296	0.0334088	0.0790016	0.127757	0.0405581	0.14267	0.190634	0.183783	0.0941475	0.0824389	0.172362
nHPGsDTsPEAEASSGGGGVALkk_S5 T7_2	Q9QXW9	Large neutral amino acids transporter small subunit 2 OS=Mus musculus GN=Slc7a8 PE=1 SV=1	nHPGsDTsPEAEASSGGGGVALkk	2	S5(Phospho): 99.91; T7(Phospho): 91.49	S5.T7	S18.T20	TAKNHPGSDTSPEAE.KNHPGSDTSPEAEAS	0.173153	1.50843	1	0.0541427	0.138846	0.122286	0.117098	0.114422	0.0865488	0.154891	0.154937	0.165745	0.105092	0.106023	0.158524
nkFGsADNIPNLkDSLEEGQVDDGGk_S5_1	F8WJ98	Transmembrane and coiled-coil domains protein 1 (Fragment) OS=Mus musculus GN=Tmcc1 PE=1 SV=2	nkFGsADNIPNLkDSLEEGQVDDGGk	1	S5(Phospho): 95.09	S5	S419	LIRNKFGSADNIPNL	0.152616	1.91702	1	0.0510309	0.162427	0.0561904	0.0853068	0.100478	0.0632639	0.113451	0.203442	0.200026	0.0898826	0.0830162	0.172306
nLIEGFNsPGQETTLNTFc_S8_1	A2AG50	MAP7 domain-containing protein 2 OS=Mus musculus GN=Map7d2 PE=1 SV=1	nLIEGFNsPGQETTLNTFc	1	S8(Phospho): 100	S8	S770	NLIEGFNSPGQETTL	0.811347	1.1016	1	0.0799528	0.245839	0.0877082	0.102788	0.0723213	0.0989036	0.160215	0.163002	0.132294	0.137833	0.0913376	0.151837
nLSLEAIQLcDRDGNkSQDsGIAEMEELPVPHNIk_S17 S20_1	Q8BGT8	Phytanoyl-CoA hydroxylase-interacting protein-like OS=Mus musculus GN=Phyhipl PE=1 SV=1	nLSLEAIQLcDRDGNkSQDsGIAEMEELPVPHNIk	1	S17(Phospho): 49.94; S20(Phospho): 49.94	S17	S38	CDRDGNKSQDSGIAE	0.252267	1.52396	1	0.079301	0.189543	0.0585611	0.0717259	0.107903	0.0597004	0.187609	0.169563	0.141779	0.109135	0.0797764	0.166317
nLsYGDNSDPALEASSLPPPDPWLETSSSSPAEPAQPGAcRR_S3 Y4_1	B1AZP2	Disks large-associated protein 4 OS=Mus musculus GN=Dlgap4 PE=1 SV=1	nLsYGDNSDPALEASSLPPPDPWLETSSSSPAEPAQPGAcRR	1	S3(Phospho): 45.2; Y4(Phospho): 45.2	S3	S763	AQIKRNLSYGDNSDP	0.0862301	1.47349	1	0.113329	0.134098	0.0681608	0.109146	0.100782	0.0945046	0.175328	0.142634	0.147054	0.105196	0.101477	0.155005
nmTVEQLLTGsPTsPTVEPEkPTR_T9 T16_2	Q6ZPJ3	(E3-independent) E2 ubiquitin-conjugating enzyme UBE2O OS=Mus musculus GN=Ube2o PE=1 SV=3	nmTVEQLLTGsPTsPTVEPEkPTR	2	T9(Phospho): 96.18; T16(Phospho): 83.11	T9.T16	T831.T838	MTVEQLLTGSPTSPT.TGSPTSPTVEPEKPT	0.116311	1.30087	1	0.115769	0.137427	0.0825488	0.100747	0.099745	0.108057	0.145728	0.154873	0.136159	0.111915	0.10285	0.145587
nNSAIDSGINLTtDtSkSAtSSSPGSPIHSLETSL_S18 S22 S23 S26_3	F8WHB1	Calcium-transporting ATPase OS=Mus musculus GN=Atp2b2 PE=1 SV=1	nNSAIDSGINLTtDtSkSAtSSSPGSPIHSLETSL	3	S18(Phospho): 81.02; S22(Phospho): 48.91; S23(Phospho): 48.7; S26(Phospho): 78.79	S18.S22.S23.S26	S1226.S1230.S1231.S1234	LTTDTSKSATSSSPG.TSKSATSSSPGSPIH.SKSATSSSPGSPIHS.ATSSSPGSPIHSLET	0.215307	1.87253	1	0.0577767	0.194761	0.0228771	0.0798168	0.110494	0.0280098	0.150178	0.199801	0.165743	0.0918048	0.0727736	0.171908
nRLTVEEATASVSEGGGLQGISMkDsDEEDEEDD_S26_1	Q80TJ1-2	Isoform 2 of Calcium-dependent secretion activator 1 OS=Mus musculus GN=Cadps	nRLTVEEATASVSEGGGLQGISMkDsDEEDEEDD	1	S26(Phospho): 96.85	S26	S1353	QGISMKDSDEEDEED	0.0552766	2.03487	1	0.0586533	0.158195	0.0569729	0.0868666	0.0889357	0.0746535	0.186605	0.166087	0.204498	0.0912736	0.0834853	0.18573
nSSLsPGLNTSNGDGSETETTSAILASVkEQELQFER_S5_1	O35927	Catenin delta-2 OS=Mus musculus GN=Ctnnd2 PE=1 SV=1	nSSLsPGLNTSNGDGSETETTSAILASVkEQELQFER	1	S5(Phospho): 99.62	S5	S32	SEKNSSLSPGLNTSN	0.586741	1.14465	1	0.105959	0.180038	0.0822438	0.0847524	0.0962585	0.101259	0.132733	0.13622	0.152553	0.122747	0.0940899	0.140502
qGQDVAPPPNPGDQIFNksk_S19_1	Q6PER3	Microtubule-associated protein RP/EB family member 3 OS=Mus musculus GN=Mapre3 PE=1 SV=1	qGQDVAPPPNPGDQIFNksk	1	S19(Phospho): 100	S19	S149	GDQIFNKSKKLIGTA	0.0551106	2.45543	1	0.0610859	0.150092	0.0288769	0.0801937	0.0941355	0.0693408	0.162187	0.184775	0.242477	0.0800183	0.0812233	0.19648
qNsATERADsIEIYIPEAQTRL_S3 S10_2	Q0VF59	Disks large-associated protein 2 OS=Mus musculus GN=Dlgap2 PE=1 SV=1	qNsATERADsIEIYIPEAQTRL	2	S3(Phospho): 88.43; S10(Phospho): 99.99	S3.S10	S1041.S1048	AASFRQNSATERADS.SATERADSIEIYIPE	0.152747	1.54308	1	0.105251	0.153187	0.0624633	0.0860749	0.109443	0.069071	0.205016	0.146176	0.143984	0.106967	0.0881963	0.165058
qNSAtESADSIEIYVPEAQTRL_T5_1	B1AZP2	Disks large-associated protein 4 OS=Mus musculus GN=Dlgap4 PE=1 SV=1	qNSAtESADSIEIYVPEAQTRL	1	T5(Phospho): 91.05	T5	T975	SVRQNSATESADSIE	0.150604	1.33139	1	0.121549	0.14738	0.0843717	0.0748577	0.0988123	0.0839027	0.181113	0.146601	0.142666	0.117767	0.0858575	0.156794
qQPPLGPSSSLLsLPsLkSR_S13 S19_2	Q8BHL3	TBC1 domain family member 10B OS=Mus musculus GN=Tbc1d10b PE=1 SV=2	qQPPLGPSSSLLsLPsLkSR	2	S13(Phospho): 99.05; S19(Phospho): 91.02	S13.S19	S647.S653	GPSSSLLSLPSLKSR.LSLPSLKSRGSRAVG	0.264598	1.49429	1	0.127672	0.178651	0.0339244	0.061187	0.097155	0.02866	0.167679	0.155565	0.185184	0.113416	0.062334	0.169476
qQsFGVkPPPsPLSPVPSVVk_S3 S14_2	F2Z3U3	Ras association (RalGDS/AF-6) and pleckstrin homology domains 1 OS=Mus musculus GN=Raph1 PE=1 SV=2	qQsFGVkPPPsPLSPVPSVVk	2	S3(Phospho): 99.97; S14(Phospho): 99.42	S3.S14	S850.S861	PTLPKQQSFGVKPPP.KPPPSPLSPVPSVVK	0.164813	2.12816	1	0.0429103	0.192615	0.0235451	0.0457887	0.133121	0.0198265	0.158502	0.225391	0.167451	0.0863568	0.0662454	0.183781
qQSLSkEGsIGGSGGSGGGGGGGLkPSITk_S9_1	F6SEU4	Ras/Rap GTPase-activating protein SynGAP OS=Mus musculus GN=Syngap1 PE=1 SV=2	qQSLSkEGsIGGSGGSGGGGGGGLkPSITk	1	S9(Phospho): 98.56	S9	S1111	QSLSKEGSIGGSGGS	0.0737143	1.53984	1	0.0797459	0.144241	0.086015	0.0862763	0.109971	0.0799333	0.166525	0.13798	0.172848	0.103334	0.0920602	0.159117
qSRPVAGGPGAPPAARPPAsPsPQRQAGAPQATR_S20 S22 T33_2	O88935	Synapsin-1 OS=Mus musculus GN=Syn1 PE=1 SV=2	qSRPVAGGPGAPPAARPPAsPsPQRQAGAPQATR	2	S20(Phospho): 95.14; S22(Phospho): 52.37; T33(Phospho): 52.37	S20.S22.T33	S551.S553.T564	PAARPPASPSPQRQA.ARPPASPSPQRQAGA.QAGAPQATRQASISG	0.518569	1.1211	1	0.0936581	0.169103	0.126792	0.111683	0.0879044	0.0625171	0.139545	0.143422	0.153761	0.129851	0.0873681	0.145576
qSsLPGTGGVASDFVkk_S2 S3_1	E9QM73	Serine/threonine-protein kinase WNK2 OS=Mus musculus GN=Wnk2 PE=1 SV=1	qSsLPGTGGVASDFVkk	1	S2(Phospho): 50; S3(Phospho): 50	S2	S1769	RSQVQKQSSLPGTGG	0.306737	1.37672	1	0.0785981	0.178437	0.0752369	0.0834854	0.106007	0.0688411	0.130814	0.167895	0.158736	0.110757	0.0861111	0.152482
qVGVFsPARsPGTEEAksPLATk_S6 S10 S18_3	Q8CJ19	[F-actin]-methionine sulfoxide oxidase MICAL3 OS=Mus musculus GN=Mical3 PE=1 SV=2	qVGVFsPARsPGTEEAksPLATk	3	S6(Phospho): 99.87; S10(Phospho): 97; S18(Phospho): 99.84	S6.S10.S18	S1167.S1171.S1179	EKQVGVFSPARSPGT.GVFSPARSPGTEEAK.PGTEEAKSPLATKVK	0.124698	1.74543	1	0.0519322	0.16855	0.0734889	0.102536	0.0928538	0.0588532	0.161601	0.194351	0.157153	0.0979903	0.0847476	0.171035
qVGVFSPARsPGTEEAksPLATk_S6 S18_2	Q8CJ19	[F-actin]-methionine sulfoxide oxidase MICAL3 OS=Mus musculus GN=Mical3 PE=1 SV=2	qVGVFSPARsPGTEEAksPLATk	2	S6(Phospho): 80.7; S18(Phospho): 82.76	S6.S18	S1167.S1179	EKQVGVFSPARSPGT.PGTEEAKSPLATKVK	0.241124	1.63099	1	0.0594668	0.178298	0.0646231	0.079214	0.121373	0.056864	0.156324	0.174938	0.161929	0.100796	0.0858169	0.164397
qVVEYYASQGISPGAPRPSTPAmTPsPsP_T24 S26 S28_2	Q9Z140	Copine-6 OS=Mus musculus GN=Cpne6 PE=1 SV=1	qVVEYYASQGISPGAPRPSTPAmTPsPsP	2	T24(Phospho): 89.35; S26(Phospho): 53.56; S28(Phospho): 53.56	T24.S26.S28	T552.S554.S556	RPSTPAMTPSPSP.STPAMTPSPSP.PAMTPSPSP	0.104632	1.81644	1	0.0748868	0.164396	0.0518998	0.0777221	0.0777681	0.0568454	0.144679	0.196929	0.187307	0.0970608	0.0707785	0.176305
rASsLNFLNksVEEPVQPGGTGLSDSR_S4 S11_2	Q91YS4	Kinesin light chain 2 OS=Mus musculus GN=Klc2 PE=1 SV=1	rASsLNFLNksVEEPVQPGGTGLSDSR	2	S4(Phospho): 82.81; S11(Phospho): 99.69	S4.S11	S579.S586	SRMKRASSLNFLNKS.SLNFLNKSVEEPVQP	0.846786	1.07407	1	0.0965938	0.225869	0.0984601	0.0619919	0.0806061	0.0768859	0.13377	0.203014	0.115317	0.140308	0.0731613	0.1507
rDySIDEkTDALFHEFLR_Y3 S4_1	E9PW07	Voltage-dependent calcium channel beta subunit-associated regulatory protein OS=Mus musculus GN=Cbarp PE=1 SV=2	rDySIDEkTDALFHEFLR	1	Y3(Phospho): 50; S4(Phospho): 50	Y3	Y543	PRRPRRDYSIDEKTD	0.130203	1.38283	1	0.114968	0.150885	0.0755903	0.096263	0.11101	0.0760962	0.167068	0.14313	0.161959	0.113814	0.0944562	0.157385
rILSDVTHsAVFGVPAskSTQLLQAAAAEASLNk_S4 S19 T20_2	Q3UHJ0	AP2-associated protein kinase 1 OS=Mus musculus GN=Aak1 PE=1 SV=2	rILSDVTHsAVFGVPAskSTQLLQAAAAEASLNk	2	S4(Phospho): 70.27; S19(Phospho): 36.8; T20(Phospho): 36.92	S4.S19.T20	S635.S650.T651	AGHRRILSDVTHSAV.FGVPASKSTQLLQAA.GVPASKSTQLLQAAA	0.306792	1.43096	1	0.103732	0.179781	0.0563167	0.083665	0.0959154	0.0759488	0.171571	0.158454	0.156257	0.113277	0.0851764	0.162094
rkLQVPtPEEMSNLTPESsPELAk_S12 S18 S19_2	G3UWV4	Serine/threonine-protein kinase BRSK2 OS=Mus musculus GN=Brsk2 PE=1 SV=1	rkLQVPtPEEMSNLTPESsPELAk	2	S12(Phospho): 89.24; S18(Phospho): 50; S19(Phospho): 50	S12.S18.S19	S529.S535.S536	VPTPEEMSNLTPESS.MSNLTPESSPELAKK.SNLTPESSPELAKKS	0.309238	1.29635	1	0.106016	0.163326	0.0770418	0.10495	0.0841863	0.0886899	0.145195	0.15086	0.152981	0.115461	0.0926088	0.149679
rPLTLFHAVPsTEkQEQR_S11_1	Q6ZQ82	Rho GTPase-activating protein 26 OS=Mus musculus GN=Arhgap26 PE=1 SV=3	rPLTLFHAVPsTEkQEQR	1	S11(Phospho): 90.51	S11	S609	TLFHAVPSTEKQEQR	0.118535	1.52067	1	0.0980428	0.154444	0.061217	0.077505	0.122975	0.0667306	0.150189	0.162586	0.164266	0.104568	0.0890702	0.159014
rPssPLIDIkPVEFGVLSAkk_S3 S4_2	Q920M7	Synaptotagmin-17 OS=Mus musculus GN=Syt17 PE=1 SV=1	rPssPLIDIkPVEFGVLSAkk	2	S3(Phospho): 99.99; S4(Phospho): 100	S3.S4	S114.S115	SLDSRRPSSPLIDIK.LDSRRPSSPLIDIKP	0.260515	1.3845	1	0.113769	0.176104	0.0697479	0.0865478	0.102775	0.0399712	0.148238	0.149827	0.199832	0.119874	0.0764314	0.165966
rRPTPATLVLTsDQssPEIDEDRIPNSLLk_S12 S15 S16_3	Q9ERT9	Protein phosphatase 1 regulatory subunit 1A OS=Mus musculus GN=Ppp1r1a PE=1 SV=1	rRPTPATLVLTsDQssPEIDEDRIPNSLLk	3	S12(Phospho): 85.92; S15(Phospho): 97.36; S16(Phospho): 97.36	S12.S15.S16	S43.S46.S47	PATLVLTSDQSSPEI.LVLTSDQSSPEIDED.VLTSDQSSPEIDEDR	0.407327	1.2914	1	0.162494	0.167269	0.061894	0.064637	0.120562	0.0341133	0.213785	0.14729	0.144709	0.130552	0.073104	0.168595
rRPTPATLVLTsDQssPEIDEDRIPNSLLk_T11 S12 S15 S16_3	Q9ERT9	Protein phosphatase 1 regulatory subunit 1A OS=Mus musculus GN=Ppp1r1a PE=1 SV=1	rRPTPATLVLTsDQssPEIDEDRIPNSLLk	3	T11(Phospho): 44.63; S12(Phospho): 44.63; S15(Phospho): 98.68; S16(Phospho): 98.68	T11.S12.S15.S16	T42.S43.S46.S47	TPATLVLTSDQSSPE.PATLVLTSDQSSPEI.LVLTSDQSSPEIDED.VLTSDQSSPEIDEDR	0.99433	1.0022	1	0.20551	0.192284	0.0707252	0.0503376	0.0892742	0.0420516	0.186305	0.135454	0.147793	0.156173	0.0605544	0.156518
rSEVDSPGDSLSWTPQPksPk_S19_1	A0A1B0GR85	RIKEN cDNA 2900026A02 gene OS=Mus musculus GN=2900026A02Rik PE=1 SV=1	rSEVDSPGDSLSWTPQPksPk	1	S19(Phospho): 99.69	S19	S1718	SWTPQPKSPKSPFHP	0.351343	1.56854	1	0.0656385	0.199034	0.0437581	0.0594989	0.105967	0.0488443	0.15313	0.172189	0.158466	0.10281	0.0714366	0.161262
rYVSsDGTEkEEVTmQGMPQEPVNIEDGDNYSk_S5 T14_1	Q8C8R3-2	Isoform 2 of Ankyrin-2 OS=Mus musculus GN=Ank2	rYVSsDGTEkEEVTmQGMPQEPVNIEDGDNYSk	1	S5(Phospho): 45.45; T14(Phospho): 45.45	S5	S3879	IIRRYVSSDGTEKEE	0.265873	1.32252	1	0.123959	0.156271	0.0617843	0.0926932	0.106939	0.0865303	0.144109	0.163551	0.144661	0.114005	0.0953874	0.150774
rYVSSDGtEkEEVTMQGmPQEPVNIEDGDNYSk_T14_1	Q8C8R3-2	Isoform 2 of Ankyrin-2 OS=Mus musculus GN=Ank2	rYVSSDGtEkEEVTMQGmPQEPVNIEDGDNYSk	1	T14(Phospho): 75.71	T14	T3888	GTEKEEVTMQGMPQE	0.181472	1.31945	1	0.118054	0.147944	0.0737033	0.0974554	0.114173	0.0870682	0.152855	0.157655	0.137708	0.113234	0.0995656	0.149406
sAtGEGPFGDVAWAGPRk_T3_1	B7ZBV9	Potassium voltage-gated channel subfamily KQT member 2 OS=Mus musculus GN=Kcnq2 PE=1 SV=1	sAtGEGPFGDVAWAGPRk	1	T3(Phospho): 94.11	T3	T855	GPPPRSATGEGPFGD	0.206111	1.56562	1	0.108569	0.163319	0.0489483	0.0747233	0.12096	0.0632445	0.175187	0.169615	0.157507	0.106945	0.0863092	0.167436
sATSSsPGsPLHSLETSL_S5 S6_2	G5E829	Plasma membrane calcium-transporting ATPase 1 OS=Mus musculus GN=Atp2b1 PE=1 SV=1	sATSSsPGsPLHSLETSL	2	S5(Phospho): 96.74; S6(Phospho): 88.81	S5.S6	S1207.S1208	MNKSATSSSPGSPLH.NKSATSSSPGSPLHS	0.0848841	2.50673	1	0.0576272	0.155808	0.0154972	0.0655447	0.111856	0.0287125	0.134359	0.224447	0.215065	0.0763107	0.0687044	0.19129
sFSGFSIsQskENLDALGScYAAVAPcAk_S3 S6 S8_2	B7ZBV9	Potassium voltage-gated channel subfamily KQT member 2 OS=Mus musculus GN=Kcnq2 PE=1 SV=1	sFSGFSIsQskENLDALGScYAAVAPcAk	2	S3(Phospho): 84.56; S6(Phospho): 51.85; S8(Phospho): 51.85	S3.S6.S8	S801.S804.S806	EELERSFSGFSISQS.ERSFSGFSISQSKEN.SFSGFSISQSKENLD	0.0652889	2.41444	1	0.0609959	0.160736	0.0138313	0.0732389	0.124673	0.0418552	0.177718	0.205086	0.18595	0.078521	0.0799223	0.189585
sGAWFFGSGPQQPsQDGTLSDTATGAGSEVPREk_S14_1	Q99NE5	Regulating synaptic membrane exocytosis protein 1 OS=Mus musculus GN=Rims1 PE=1 SV=2	sGAWFFGSGPQQPsQDGTLSDTATGAGSEVPREk	1	S14(Phospho): 81.91	S14	S211	GSGPQQPSQDGTLSD	0.171038	1.51487	1	0.105	0.162616	0.0561436	0.0862301	0.0971231	0.102575	0.161903	0.186516	0.142035	0.10792	0.0953095	0.163485
sGQASPSRPEsPRPPFDL_S11_1	A0A0J9YUN4	Dynamin-1 OS=Mus musculus GN=Dnm1 PE=1 SV=1	sGQASPSRPEsPRPPFDL	1	S11(Phospho): 99.97	S11	S857	ASPSRPESPRPPFDL	0.183934	2.09242	1	0.0539453	0.186693	0.00911529	0.0491283	0.128752	0.0602814	0.136058	0.198097	0.188436	0.0832511	0.0793872	0.174197
sGQASPsRPEsPRPPFDL_S5 S11_2	A0A0J9YUN4	Dynamin-1 OS=Mus musculus GN=Dnm1 PE=1 SV=1	sGQASPsRPEsPRPPFDL	2	S5(Phospho): 92.84; S11(Phospho): 96.32	S5.S11	S851.S857	PSRSGQASPSRPESP.ASPSRPESPRPPFDL	0.17777	1.68899	1	0.0697988	0.177781	0.0586084	0.0583771	0.0939532	0.0645338	0.131882	0.193247	0.192021	0.102063	0.072288	0.172384
sGSEyNLPAFMSLySPTETPSGSSTTPSSGRPLk_S3 S15_2	O88737	Protein bassoon OS=Mus musculus GN=Bsn PE=1 SV=4	sGSEyNLPAFMSLySPTETPSGSSTTPSSGRPLk	2	S3(Phospho): 74.34; S15(Phospho): 93.56	S3.S15	S1161.S1173	TRLYKSGSEYNLPAF.PAFMSLYSPTETPSG	0.0994216	1.80462	1	0.103407	0.15206	0.0375143	0.0710058	0.131809	0.0432457	0.197636	0.18574	0.145344	0.0976605	0.0820201	0.17624
sGsIVELLAGGGsScSPVLSRk_S1 S16_2	G3X9H5	Huntingtin OS=Mus musculus GN=Htt PE=1 SV=1	sGsIVELLAGGGsScSPVLSRk	2	S1(Phospho): 99.52; S16(Phospho): 93.63	S1.S16	S397.S412	EARGRGRSGSIVELL.AGGGSSCSPVLSRKQ	0.552476	1.15158	1	0.115181	0.179711	0.0878852	0.101428	0.0893518	0.0848316	0.155349	0.1439	0.14155	0.127592	0.0918705	0.146933
sGsIVELLAGGGsScSPVLSRk_S13 S14_2	G3X9H5	Huntingtin OS=Mus musculus GN=Htt PE=1 SV=1	sGsIVELLAGGGsScSPVLSRk	2	S13(Phospho): 84.95; S14(Phospho): 84.98	S13.S14	S409.S410	ELLAGGGSSCSPVLS.LLAGGGSSCSPVLSR	0.204101	1.41783	1	0.118495	0.161033	0.0593315	0.0922112	0.101543	0.0736206	0.166556	0.14058	0.173311	0.112953	0.0891251	0.160149
sGsIVELLAGGGsScSPVLSRk_S3 S13_2	G3X9H5	Huntingtin OS=Mus musculus GN=Htt PE=1 SV=1	sGsIVELLAGGGsScSPVLSRk	2	S3(Phospho): 99.77; S13(Phospho): 88.79	S3.S13	S399.S409	RGRGRSGSIVELLAG.ELLAGGGSSCSPVLS	0.391659	1.19159	1	0.130249	0.162171	0.0803144	0.0987896	0.0986394	0.0899057	0.161924	0.141392	0.140832	0.124245	0.0957782	0.148049
sIDAALFREHLVR_S1_1	A0A0N4SVB5	Proline-rich transmembrane protein 3 OS=Mus musculus GN=Prrt3 PE=1 SV=1	sIDAALFREHLVR	1	S1(Phospho): 100	S1	S807	SPINLSRSIDAALFR	0.92007	0.965238	1	0.140082	0.228079	0.0688166	0.0783388	0.0987858	0.0542081	0.153357	0.118299	0.150132	0.145659	0.0771109	0.140596
skkYSDVEVPASVtGHSFASDGDSGTcsPLR_S1 Y4 S24_2	F8WGR0	Alpha-adducin OS=Mus musculus GN=Add1 PE=1 SV=1	skkYSDVEVPASVtGHSFASDGDSGTcsPLR	2	S1(Phospho): 44.69; Y4(Phospho): 44.69; S24(Phospho): 65.68	S1.Y4.S24	S404.Y407.S427	YPALRERSKKYSDVE.LRERSKKYSDVEVPA.SFASDGDSGTCSPLR	0.0733577	1.88468	1	0.0659818	0.134671	0.0773574	0.0865205	0.105294	0.0759876	0.121639	0.202258	0.200065	0.0926702	0.0892673	0.174654
skLDWEsFkEEEGIGEELAIHNR_S1 S7_1	O88271	Craniofacial development protein 1 OS=Mus musculus GN=Cfdp1 PE=1 SV=1	skLDWEsFkEEEGIGEELAIHNR	1	S1(Phospho): 50; S7(Phospho): 50	S1	S240	KMSTLEKSKLDWESF	0.129084	1.64999	1	0.0835947	0.147934	0.0753541	0.0924495	0.0768694	0.0670504	0.116313	0.194691	0.19535	0.102294	0.0787898	0.168784
skPIPImPAsPQkGHAVNLLDVPVPVAR_S10_1	E9PUD2	Dynamin-1-like protein OS=Mus musculus GN=Dnm1l PE=1 SV=1	skPIPImPAsPQkGHAVNLLDVPVPVAR	1	S10(Phospho): 99.38	S10	S592	PIPIMPASPQKGHAV	0.149358	1.30011	1	0.0970652	0.147846	0.0921718	0.101397	0.107841	0.0898437	0.133952	0.148454	0.155838	0.112361	0.0996937	0.146081
sksMkIsNSSEFSAk_S1 S3 S7 S9_2	E9PUC5	PH and SEC7 domain-containing protein 3 OS=Mus musculus GN=Psd3 PE=1 SV=1	sksMkIsNSSEFSAk	2	S1(Phospho): 49.1; S3(Phospho): 49.1; S7(Phospho): 45.96; S9(Phospho): 45.96	S1.S3.S7.S9	S36.S38.S42.S44	IRRQSHRSKSMKISN.RQSHRSKSMKISNSS.RSKSMKISNSSEFSA.KSMKISNSSEFSAKE	0.0594472	2.22849	1	0.0731554	0.161734	0.0358851	0.0801109	0.057208	0.0389383	0.188607	0.173944	0.240867	0.090258	0.0587524	0.201139
skSMTAELEELVDkASVR_S3 T5_1	Q80Z38-2	Isoform 2 of SH3 and multiple ankyrin repeat domains protein 2 OS=Mus musculus GN=Shank2	skSMTAELEELVDkASVR	1	S3(Phospho): 47.39; T5(Phospho): 47.39	S3	S372	ALTLRSKSMTAELEE	0.155988	1.64089	1	0.086434	0.166843	0.0495747	0.0747257	0.118461	0.078287	0.185074	0.140234	0.171637	0.100951	0.0904911	0.165648
skTPPsNLsPIEDAsPTEELRQAAEMEELHR_S1 T3 S9 S15 T17_4	O88737	Protein bassoon OS=Mus musculus GN=Bsn PE=1 SV=4	skTPPsNLsPIEDAsPTEELRQAAEMEELHR	4	S1(Phospho): 99.97; T3(Phospho): 99.9; S9(Phospho): 79.76; S15(Phospho): 51.02; T17(Phospho): 51.02	S1.T3.S9.S15.T17	S1100.T1102.S1108.S1114.T1116	AQRRRERSKTPPSNL.RRRERSKTPPSNLSP.KTPPSNLSPIEDASP.LSPIEDASPTEELRQ.PIEDASPTEELRQAA	0.145499	2.10017	1	0.07266	0.172693	0.0192129	0.0675298	0.110561	0.018985	0.130673	0.231803	0.193157	0.0881885	0.0656918	0.185211
skTPPsNLsPIEDAsPTEELRQAAEMEELHR_S1 T3 S9 S15_4	O88737	Protein bassoon OS=Mus musculus GN=Bsn PE=1 SV=4	skTPPsNLsPIEDAsPTEELRQAAEMEELHR	4	S1(Phospho): 98.61; T3(Phospho): 94.81; S9(Phospho): 94.81; S15(Phospho): 94.33	S1.T3.S9.S15	S1100.T1102.S1108.S1114	AQRRRERSKTPPSNL.RRRERSKTPPSNLSP.KTPPSNLSPIEDASP.LSPIEDASPTEELRQ	0.19289	1.8603	1	0.0755995	0.190069	0.0222447	0.054544	0.104809	0.050326	0.157407	0.215069	0.163129	0.0959711	0.0698929	0.178535
sLDsLDPAGLLTsPkFR_S1 S4 S13_2	Q9D415	Disks large-associated protein 1 OS=Mus musculus GN=Dlgap1 PE=1 SV=3	sLDsLDPAGLLTsPkFR	2	S1(Phospho): 50; S4(Phospho): 50; S13(Phospho): 99.7	S1.S4.S13	S425.S428.S437	SEVSINRSLDSLDPA.SINRSLDSLDPAGLL.DPAGLLTSPKFRSRN	0.233988	1.41598	1	0.0777957	0.160555	0.084039	0.107886	0.110555	0.0772025	0.148377	0.157718	0.150402	0.107463	0.0985478	0.152166
sLkFNLMSDAPGDSPR_S1_1	F7BJK1	Protocadherin 1 (Fragment) OS=Mus musculus GN=Pcdh1 PE=1 SV=1	sLkFNLMSDAPGDSPR	1	S1(Phospho): 100	S1	S775	DDTGLQKSLKFNLMS	0.333232	1.52845	1	0.0640027	0.224617	0.0576909	0.0654549	0.0824137	0.051064	0.16007	0.175588	0.193659	0.115437	0.0663109	0.176439
sLSGStNtVSSEGVtkDSIPcLSVk_S5 T8 S10_3	Q5DQR4	Syntaxin-binding protein 5-like OS=Mus musculus GN=Stxbp5l PE=1 SV=1	sLSGStNtVSSEGVtkDSIPcLSVk	3	S5(Phospho): 88.38; T8(Phospho): 88.58; S10(Phospho): 87.6	S5.T8.S10	S592.T595.S597	PSRSLSGSTNTVSSE.SLSGSTNTVSSEGVT.SGSTNTVSSEGVTKD	0.235474	1.35021	1	0.14951	0.13292	0.0660077	0.11342	0.0785935	0.0656589	0.130944	0.160068	0.179454	0.116146	0.0858909	0.156822
sLSIEIGHEVkNQNk_S3_1	O35623	BET1 homolog OS=Mus musculus GN=Bet1 PE=1 SV=1	sLSIEIGHEVkNQNk	1	S3(Phospho): 87.39	S3	S50	VTAIKSLSIEIGHEV	0.235278	1.36633	1	0.113912	0.160273	0.0656806	0.0860341	0.109584	0.0679724	0.162786	0.13163	0.169954	0.113288	0.0878636	0.15479
sMsDPkPLsPTADESSRAPFQYSEGFTAk_S1 S3 S9_2	Q9QYX7	Protein piccolo OS=Mus musculus GN=Pclo PE=1 SV=4	sMsDPkPLsPTADESSRAPFQYSEGFTAk	2	S1(Phospho): 50.97; S3(Phospho): 50.97; S9(Phospho): 91.65	S1.S3.S9	S3608.S3610.S3616	TAKMMQRSMSDPKPL.KMMQRSMSDPKPLSP.MSDPKPLSPTADESS	0.0801604	1.63011	1	0.0776222	0.147931	0.070162	0.0862238	0.113904	0.0912006	0.153171	0.180135	0.148741	0.0985717	0.0971095	0.160682
smsDPkPLsPTADESSRAPFQYSEGFTAk_S1 S3 T11 S15 S16_3	Q9QYX7	Protein piccolo OS=Mus musculus GN=Pclo PE=1 SV=4	smsDPkPLsPTADESSRAPFQYSEGFTAk	3	S1(Phospho): 100; S3(Phospho): 100; T11(Phospho): 31.16; S15(Phospho): 31.16; S16(Phospho): 31.16	S1.S3.T11.S15.S16	S3608.S3610.T3618.S3622.S3623	TAKMMQRSMSDPKPL.KMMQRSMSDPKPLSP.DPKPLSPTADESSRA.LSPTADESSRAPFQY.SPTADESSRAPFQYS	0.297708	1.49134	1	0.0769591	0.189159	0.0596515	0.0690411	0.118854	0.0500897	0.153717	0.197287	0.134831	0.10859	0.0793282	0.161945
smsDPkPLsPTADESSRAPFQYSEGFTAk_S3 S9_2	Q9QYX7	Protein piccolo OS=Mus musculus GN=Pclo PE=1 SV=4	smsDPkPLsPTADESSRAPFQYSEGFTAk	2	S3(Phospho): 85.12; S9(Phospho): 99.33	S3.S9	S3610.S3616	KMMQRSMSDPKPLSP.MSDPKPLSPTADESS	0.122933	1.52924	1	0.0794195	0.157354	0.0732352	0.0883422	0.112639	0.0884923	0.160007	0.16962	0.144451	0.103336	0.0964913	0.158026
sNSPLPSIQLQPQsPSASkk_S14 S16_1	F7BJK1	Protocadherin 1 (Fragment) OS=Mus musculus GN=Pcdh1 PE=1 SV=1	sNSPLPSIQLQPQsPSASkk	1	S14(Phospho): 49.98; S16(Phospho): 49.98	S14	S823	SIQLQPQSPSASKKH	0.193073	1.41044	1	0.0843551	0.163723	0.0847086	0.0837078	0.110509	0.101557	0.131834	0.168431	0.169111	0.110929	0.0985913	0.156458
sNSPLPSIQLQPQsPSASkk_S14_1	F7BJK1	Protocadherin 1 (Fragment) OS=Mus musculus GN=Pcdh1 PE=1 SV=1	sNSPLPSIQLQPQsPSASkk	1	S14(Phospho): 79.99	S14	S823	SIQLQPQSPSASKKH	0.121189	1.56298	1	0.0818562	0.159893	0.0687091	0.0868936	0.123706	0.0873081	0.146234	0.175298	0.163709	0.103486	0.0993024	0.161747
sNSPLPsIQLQPQsPSASkk_S3 S16_2	F7BJK1	Protocadherin 1 (Fragment) OS=Mus musculus GN=Pcdh1 PE=1 SV=1	sNSPLPsIQLQPQsPSASkk	2	S3(Phospho): 98.73; S16(Phospho): 97.54	S3.S16	S812.S825	GRHYRSNSPLPSIQL.QLQPQSPSASKKHQV	0.253352	1.62737	1	0.0575285	0.199504	0.0617219	0.0797713	0.101598	0.0495849	0.144299	0.2062	0.168235	0.106252	0.0769847	0.172911
sPGLTAsPTsSPSRRPSPAEEPGELEDNYLEYLR_S1 T5_2	A0A1C7CYU5	FTS and Hook-interacting protein OS=Mus musculus GN=Fam160a2 PE=1 SV=1	sPGLTAsPTsSPSRRPSPAEEPGELEDNYLEYLR	2	S1(Phospho): 67.29; T5(Phospho): 43.38	S1.T5	S537.T541	SPGPVPRSPGLTASP.VPRSPGLTASPTSSP	0.0728171	2.48515	1	0.0800737	0.165401	0.0396751	0.1155	0.0880849	0.0479508	0.32301	0.213871	0.171758	0.0950499	0.0838452	0.236213
sPGLTAsPTsSPSRRPSPAEEPGELEDNYLEYLR_T9 S10 S17_2	A0A1C7CYU5	FTS and Hook-interacting protein OS=Mus musculus GN=Fam160a2 PE=1 SV=1	sPGLTAsPTsSPSRRPSPAEEPGELEDNYLEYLR	2	T9(Phospho): 37.99; S10(Phospho): 37.99; S17(Phospho): 79.86	T9.S10.S17	T545.S546.S553	PGLTASPTSSPSRRP.GLTASPTSSPSRRPS.SSPSRRPSPAEEPGE	0.0748364	2.8415	1	0.0551805	0.181478	0.0125101	0.0669278	0.0967642	0.075476	0.287909	0.260086	0.160018	0.0830563	0.0797227	0.236004
sQPLQNVSAVLQkPNPLYHQNTDmVQk_S1_1	Q5SUH6	Clathrin interactor 1 OS=Mus musculus GN=Clint1 PE=1 SV=1	sQPLQNVSAVLQkPNPLYHQNTDmVQk	1	S1(Phospho): 99.69	S1	S457	LGLPMSRSQPLQNVS	0.0566064	1.3734	1	0.127933	0.136115	0.0904592	0.107311	0.0885037	0.0838917	0.152853	0.154039	0.179986	0.118169	0.0932354	0.162293
sQQQLHSPALsPAHSPAkQPLGkPEQER_S11_1	O88737	Protein bassoon OS=Mus musculus GN=Bsn PE=1 SV=4	sQQQLHSPALsPAHSPAkQPLGkPEQER	1	S11(Phospho): 99.8	S11	S245	QLHSPALSPAHSPAK	0.637772	1.22283	1	0.0721208	0.229234	0.0708674	0.0797061	0.105118	0.0382165	0.137142	0.179249	0.138773	0.124074	0.0743467	0.151721
sQQQLHsPALsPAHSPAkQPLGkPEQER_S7 S11_2	O88737	Protein bassoon OS=Mus musculus GN=Bsn PE=1 SV=4	sQQQLHsPALsPAHSPAkQPLGkPEQER	2	S7(Phospho): 95.89; S11(Phospho): 82.81	S7.S11	S241.S245	KSQQQLHSPALSPAH.QLHSPALSPAHSPAK	0.660127	1.31482	1	0.0412593	0.273251	0.0406965	0.0828008	0.0897057	0.0302301	0.133038	0.180178	0.153815	0.118402	0.0675789	0.155677
sQSLtNAFNLPEPAPPRPSLSQDEVkAEtIR_S1 S3 T29_2	O88935	Synapsin-1 OS=Mus musculus GN=Syn1 PE=1 SV=2	sQSLtNAFNLPEPAPPRPSLSQDEVkAEtIR	2	S1(Phospho): 44.86; S3(Phospho): 44.86; T29(Phospho): 99.15	S1.S3.T29	S664.S666.T692	PHPQLNKSQSLTNAF.PQLNKSQSLTNAFNL.QDEVKAETIRSLRKS	0.251358	1.58	1	0.0809551	0.17364	0.0503461	0.080009	0.124638	0.0572624	0.152804	0.170006	0.158998	0.101647	0.0873032	0.160603
sQsLTNAFNLPEPAPPRPsLSQDEVkAETIR_S1 S3 T5 S21_2	O88935	Synapsin-1 OS=Mus musculus GN=Syn1 PE=1 SV=2	sQsLTNAFNLPEPAPPRPsLSQDEVkAETIR	2	S1(Phospho): 33.33; S3(Phospho): 33.33; T5(Phospho): 33.33; S21(Phospho): 83.65	S1.S3.T5.S21	S664.S666.T668.S684	PHPQLNKSQSLTNAF.PQLNKSQSLTNAFNL.LNKSQSLTNAFNLPE.APPRPSLSQDEVKAE	0.187342	1.60464	1	0.0898238	0.167325	0.0468389	0.0769065	0.117267	0.057014	0.136138	0.190268	0.161386	0.101329	0.0837292	0.162597
sQSLTNAFNLPEPAPPRPSLSQDEVkAETIR_S1 S3_1	O88935	Synapsin-1 OS=Mus musculus GN=Syn1 PE=1 SV=2	sQSLTNAFNLPEPAPPRPSLSQDEVkAETIR	1	S1(Phospho): 45.24; S3(Phospho): 45.24	S1	S664	PHPQLNKSQSLTNAF	0.114256	1.86133	1	0.043885	0.169041	0.0667514	0.0863838	0.0986708	0.0474836	0.155114	0.191226	0.174232	0.0932259	0.0775127	0.173524
sQSLTNAFNLPEPAPPRPSLsQDEVkAETIR_S21_1	O88935	Synapsin-1 OS=Mus musculus GN=Syn1 PE=1 SV=2	sQSLTNAFNLPEPAPPRPSLsQDEVkAETIR	1	S21(Phospho): 98.07	S21	S684	APPRPSLSQDEVKAE	0.22328	1.52837	1	0.0743437	0.174434	0.0584887	0.0709665	0.122164	0.0772355	0.140919	0.174435	0.154263	0.102422	0.090122	0.156539
sQsLTNAFNLPEPAPPRPsLSQDEVkAETIR_T5 S21_2	O88935	Synapsin-1 OS=Mus musculus GN=Syn1 PE=1 SV=2	sQsLTNAFNLPEPAPPRPsLSQDEVkAETIR	2	T5(Phospho): 84.51; S21(Phospho): 86.32	T5.S21	T668.S684	LNKSQSLTNAFNLPE.APPRPSLSQDEVKAE	0.243533	1.51639	1	0.0824045	0.172625	0.061097	0.0841123	0.106888	0.0554662	0.121808	0.191786	0.165776	0.105375	0.0821557	0.15979
sQSLtNAFNLPEPAPPRPSLsQDEVkAETIR_T5 T29_2	O88935	Synapsin-1 OS=Mus musculus GN=Syn1 PE=1 SV=2	sQSLtNAFNLPEPAPPRPSLsQDEVkAETIR	2	T5(Phospho): 93.18; T29(Phospho): 97.01	T5.T29	T668.T692	LNKSQSLTNAFNLPE.QDEVKAETIRSLRKS	0.115959	1.64031	1	0.0807086	0.161628	0.0581463	0.0887393	0.103836	0.0692416	0.157065	0.176915	0.158904	0.100161	0.0872725	0.164295
sQsLTNAFNLPEPAPPRPSLSQDEVkAETIR_T5_1	O88935	Synapsin-1 OS=Mus musculus GN=Syn1 PE=1 SV=2	sQsLTNAFNLPEPAPPRPSLSQDEVkAETIR	1	T5(Phospho): 99.34	T5	T668	LNKSQSLTNAFNLPE	0.157133	1.59885	1	0.072554	0.168645	0.0618099	0.0770876	0.124943	0.0576873	0.14655	0.170986	0.16693	0.101003	0.0865727	0.161489
sRSLEcRLDGELAITkPNVSSPSk_S1_1	Q69ZW3	EH domain-binding protein 1 OS=Mus musculus GN=Ehbp1 PE=1 SV=3	sRSLEcRLDGELAITkPNVSSPSk	1	S1(Phospho): 86.52	S1	S745	EQGKMEKSRSLECRL	0.254797	1.32275	1	0.09432	0.172432	0.0877563	0.102225	0.0922908	0.0666098	0.144664	0.149785	0.174477	0.118169	0.0870417	0.156309
sRSPGtPAGEGSGsPPkWQIGEQEFEALMR_T6 S14_2	F8WGR0	Alpha-adducin OS=Mus musculus GN=Add1 PE=1 SV=1	sRSPGtPAGEGSGsPPkWQIGEQEFEALMR	2	T6(Phospho): 99.89; S14(Phospho): 87.51	T6.S14	T358.S366	AKSRSPGTPAGEGSG.PAGEGSGSPPKWQIG	0.116144	1.28933	1	0.0941341	0.14293	0.120582	0.107793	0.0910971	0.0925434	0.135541	0.155842	0.169741	0.119215	0.0971444	0.153708
sRsQTPLSTAAVSSQDTASHGAPLDRNk_S3_1	Q99NE5	Regulating synaptic membrane exocytosis protein 1 OS=Mus musculus GN=Rims1 PE=1 SV=2	sRsQTPLSTAAVSSQDTASHGAPLDRNk	1	S3(Phospho): 85.44	S3	S241	RLQERSRSQTPLSTA	0.65165	1.10123	1	0.125881	0.194647	0.105847	0.083432	0.0797909	0.0549785	0.177144	0.157536	0.134859	0.142125	0.0727338	0.156513
sRSSVSkVPLLLPNVSALESQIEMGNIVkPk_S3 S4 S6_1	Q99P72	Reticulon-4 OS=Mus musculus GN=Rtn4 PE=1 SV=2	sRSSVSkVPLLLPNVSALESQIEMGNIVkPk	1	S3(Phospho): 31.68; S4(Phospho): 31.68; S6(Phospho): 31.68	S3	S913	DEFSKSRSSVSKVPL	0.177314	1.45737	1	0.0915883	0.161851	0.0862769	0.0841676	0.105873	0.0686318	0.143065	0.146556	0.20547	0.113239	0.0862241	0.16503
sSSLDMtPYSTPQMsPATTPANkk_S1 S2 S3 T7 S15_2	Q6PAR5	GTPase-activating protein and VPS9 domain-containing protein 1 OS=Mus musculus GN=Gapvd1 PE=1 SV=2	sSSLDMtPYSTPQMsPATTPANkk	2	S1(Phospho): 25; S2(Phospho): 25; S3(Phospho): 25; T7(Phospho): 25; S15(Phospho): 87.15	S1.S2.S3.T7.S15	S452.S453.S454.T458.S466	PQAKPGKSSSLDMTP.QAKPGKSSSLDMTPY.AKPGKSSSLDMTPYS.KSSSLDMTPYSTPQM.PYSTPQMSPATTPAN	0.193698	1.60809	1	0.093408	0.160854	0.0504898	0.0824312	0.116114	0.0524445	0.162624	0.16805	0.159393	0.101584	0.0836632	0.163356
sSsLVNLWk_S2_1	Q3UVX5	Metabotropic glutamate receptor 5 OS=Mus musculus GN=Grm5 PE=1 SV=2	sSsLVNLWk	1	S2(Phospho): 91.98	S2	S859	SSAASRSSSLVNLWK	0.129322	1.58862	1	0.0983994	0.153794	0.0496144	0.0786231	0.126052	0.0769233	0.145259	0.162689	0.171511	0.100602	0.0938662	0.15982
sTELGSDYYELSDSRGSAQESLDTIsPkNQHDEk_Y8 Y9_1	P20357	Microtubule-associated protein 2 OS=Mus musculus GN=Map2 PE=1 SV=2	sTELGSDYYELSDSRGSAQESLDTIsPkNQHDEk	1	Y8(Phospho): 42.09; Y9(Phospho): 42.09	Y8	Y590	STELGSDYYELSDSR	0.403009	1.26038	1	0.0627525	0.168101	0.149336	0.0897701	0.0567311	0.11659	0.168477	0.132411	0.178296	0.12673	0.087697	0.159728
sTGGPPGPGPLPGPQGLSSSSGsRELLGAELRTsPk_S23 T33 S34_2	Q3UHD9	Arf-GAP with GTPase, ANK repeat and PH domain-containing protein 2 OS=Mus musculus GN=Agap2 PE=1 SV=1	sTGGPPGPGPLPGPQGLSSSSGsRELLGAELRTsPk	2	S23(Phospho): 69.98; T33(Phospho): 49.27; S34(Phospho): 49.27	S23.T33.S34	S371.T381.S382	GLSSSSGSRELLGAE.LLGAELRTSPKAVVN.LGAELRTSPKAVVNS	0.353965	1.36253	1	0.0809893	0.185093	0.069711	0.0686239	0.122013	0.0524062	0.142158	0.177044	0.138325	0.111931	0.0810145	0.152509
stPSWQRSEDSLADQMEPTcHLPAVSk_S4_1	Q8C0T5	Signal-induced proliferation-associated 1-like protein 1 OS=Mus musculus GN=Sipa1l1 PE=1 SV=2	stPSWQRSEDSLADQMEPTcHLPAVSk	1	S4(Phospho): 80.23	S4	S1203	GSGKSTPSWQRSEDS	0.3253	1.28477	1	0.109942	0.169968	0.0697578	0.0998764	0.114221	0.0763904	0.146124	0.160513	0.142606	0.116556	0.0968292	0.149747
sTPSWQRsEDsLADQMEPTcHLPAVSk_S8 S11_2	Q8C0T5	Signal-induced proliferation-associated 1-like protein 1 OS=Mus musculus GN=Sipa1l1 PE=1 SV=2	sTPSWQRsEDsLADQMEPTcHLPAVSk	2	S8(Phospho): 99.76; S11(Phospho): 96.4	S8.S11	S1207.S1210	STPSWQRSEDSLADQ.SWQRSEDSLADQMEP	0.135557	1.58914	1	0.117499	0.153828	0.0445759	0.0727412	0.13227	0.0648364	0.184511	0.159956	0.157549	0.105301	0.089949	0.167339
sTTEPGPPGYSVsPPVPGRsPGLPIR_S13 S20_2	Q640R3	Hepatocyte cell adhesion molecule OS=Mus musculus GN=Hepacam PE=1 SV=2	sTTEPGPPGYSVsPPVPGRsPGLPIR	2	S13(Phospho): 99.96; S20(Phospho): 99.99	S13.S20	S345.S352	GPPGYSVSPPVPGRS.SPPVPGRSPGLPIRS	0.600533	1.2574	1	0.0892676	0.233428	0.0506685	0.0901629	0.119577	0.0696494	0.169193	0.137906	0.162369	0.124455	0.0931298	0.156489
sTVsIEEAVAkkEESFk_S4_1	P20357	Microtubule-associated protein 2 OS=Mus musculus GN=Map2 PE=1 SV=2	sTVsIEEAVAkkEESFk	1	S4(Phospho): 89.56	S4	S447	LDEKSTVSIEEAVAK	0.199855	1.44386	1	0.0670749	0.169696	0.0945434	0.108316	0.0928343	0.0877968	0.145451	0.156728	0.176193	0.110438	0.0963157	0.159457
sVDIHDSIQPR_S1_1	G3X9K3	Brefeldin A-inhibited guanine nucleotide-exchange protein 1 OS=Mus musculus GN=Arfgef1 PE=1 SV=1	sVDIHDSIQPR	1	S1(Phospho): 100	S1	S1566	LDAISQKSVDIHDSI	0.12856	1.69455	1	0.128601	0.13745	0.0314817	0.0615961	0.136928	0.0491687	0.176159	0.18379	0.144236	0.0991775	0.0825643	0.168061
sVIEPLPVTPTRDVATsPIsPTENNTTPPDALTR_S17 S20_2	G5E884	Serine/threonine-protein kinase PAK 1 OS=Mus musculus GN=Pak1 PE=1 SV=1	sVIEPLPVTPTRDVATsPIsPTENNTTPPDALTR	2	S17(Phospho): 83.85; S20(Phospho): 86.3	S17.S20	S219.S222	PTRDVATSPISPTEN.DVATSPISPTENNTT	0.718853	1.06465	1	0.148001	0.163052	0.0924874	0.108673	0.0887462	0.0766514	0.139779	0.13355	0.156303	0.134513	0.0913567	0.14321
sVIEPLPVtPTRDVATSPIsPTENNTTPPDALTR_T9 T22_2	G5E884	Serine/threonine-protein kinase PAK 1 OS=Mus musculus GN=Pak1 PE=1 SV=1	sVIEPLPVtPTRDVATSPIsPTENNTTPPDALTR	2	T9(Phospho): 88.04; T22(Phospho): 88.26	T9.T22	T211.T224	VIEPLPVTPTRDVAT.ATSPISPTENNTTPP	0.104826	1.89453	1	0.0563448	0.165363	0.048077	0.101581	0.121694	0.0386818	0.163133	0.184948	0.163034	0.0899282	0.0873191	0.170372
sVSQLPsPPLLPtPPPk_S7 T13_2	Q8BYK5-2	Isoform 2 of Phosphatase and actin regulator 3 OS=Mus musculus GN=Phactr3	sVSQLPsPPLLPtPPPk	2	S7(Phospho): 99.97; T13(Phospho): 100	S7.T13	S230.T236	RSVSQLPSPPLLPTP.PSPPLLPTPPPKASS	0.117147	1.38361	1	0.0929796	0.14534	0.0998922	0.117232	0.097541	0.102708	0.154632	0.159728	0.153592	0.112737	0.105827	0.155984
tALVsPGkVDLMTSERAEGIPELQASEk_S5_1	Q3UNH4	G protein-regulated inducer of neurite outgrowth 1 OS=Mus musculus GN=Gprin1 PE=1 SV=2	tALVsPGkVDLMTSERAEGIPELQASEk	1	S5(Phospho): 99.95	S5	S519	SGKTALVSPGKVDLM	0.424069	1.31246	1	0.0773959	0.196264	0.089029	0.0856073	0.0738038	0.067836	0.121279	0.185718	0.169017	0.120896	0.075749	0.158671
tALVSPGkVDLMTSERAEGIPELQASEk_T1 T13 S14_1	Q3UNH4	G protein-regulated inducer of neurite outgrowth 1 OS=Mus musculus GN=Gprin1 PE=1 SV=2	tALVSPGkVDLMTSERAEGIPELQASEk	1	T1(Phospho): 30.9; T13(Phospho): 30.9; S14(Phospho): 30.9	T1	T515	VPTSSGKTALVSPGK	0.282935	1.48523	1	0.068099	0.196739	0.0718584	0.0709639	0.0823981	0.0673222	0.143923	0.18466	0.171491	0.112232	0.0735614	0.166691
tcDSPQNPVDFISGPVPDsPFPR_S4 S19_2	P52479-2	Isoform 2 of Ubiquitin carboxyl-terminal hydrolase 10 OS=Mus musculus GN=Usp10	tcDSPQNPVDFISGPVPDsPFPR	2	S4(Phospho): 91.42; S19(Phospho): 100	S4.S19	S209.S224	VMPRTCDSPQNPVDF.ISGPVPDSPFPRTLG	0.0938359	1.71111	1	0.115195	0.137078	0.0614722	0.0714032	0.120656	0.0313083	0.205904	0.127984	0.202962	0.104582	0.0744557	0.17895
tDHGAEIVYksPVVsGDTsPR_S15 T18 S19_3	P10637-2	Isoform Tau-A of Microtubule-associated protein tau OS=Mus musculus GN=Mapt	tDHGAEIVYksPVVsGDTsPR	3	S15(Phospho): 99.46; T18(Phospho): 95.02; S19(Phospho): 95.02	S15.T18.S19	S389.T392.S393	VYKSPVVSGDTSPRH.SPVVSGDTSPRHLSN.PVVSGDTSPRHLSNV	0.218661	1.4654	1	0.0759434	0.173431	0.0772539	0.108251	0.1063	0.0374307	0.146447	0.18534	0.146854	0.108876	0.0839938	0.159547
tEVLAAGSPGENkSPPRPcGLNHSDsLSR_S8_1	Q3TWN3	Metal transporter CNNM2 OS=Mus musculus GN=Cnnm2 PE=1 SV=3	tEVLAAGSPGENkSPPRPcGLNHSDsLSR	1	S8(Phospho): 48.13	S8	S743	TEVLAAGSPGENKSP	0.0968308	1.37548	1	0.0981913	0.145713	0.0873796	0.0778224	0.111232	0.0724742	0.145344	0.165641	0.144688	0.110428	0.0871761	0.151891
tEWQPsPTDIPLQk_T8_1	Q8C8R3-2	Isoform 2 of Ankyrin-2 OS=Mus musculus GN=Ank2	tEWQPsPTDIPLQk	1	T8(Phospho): 93.15	T8	T3345	TEWQPSPTDIPLQKT	0.0749059	1.44995	1	0.0737972	0.140374	0.0999254	0.0953959	0.116561	0.0971804	0.146238	0.158332	0.150855	0.104699	0.103046	0.151808
tGsNIsGASSDVSLDEQYkHQLEETkk_T1 S3_2	Q3B7Z2	Oxysterol-binding protein 1 OS=Mus musculus GN=Osbp PE=1 SV=3	tGsNIsGASSDVSLDEQYkHQLEETkk	2	T1(Phospho): 68.63; S3(Phospho): 68.63	T1.S3	T375.S377	ENLGHKRTGSNISGA.LGHKRTGSNISGASS	0.125127	1.93347	1	0.0553574	0.156751	0.0548422	0.0832318	0.110029	0.0616801	0.119833	0.191809	0.204501	0.0889837	0.0849802	0.172048
tPGtPGtPSYPR_T4 T7_2	P20357	Microtubule-associated protein 2 OS=Mus musculus GN=Map2 PE=1 SV=2	tPGtPGtPSYPR	2	T4(Phospho): 99.88; T7(Phospho): 90.77	T4.T7	T1620.T1623	YSSRTPGTPGTPSYP.RTPGTPGTPSYPRTP	0.12695	1.56196	1	0.0897885	0.15139	0.0739308	0.119666	0.108226	0.067632	0.157249	0.167373	0.167568	0.105036	0.0985083	0.164063
tPGTPGtPSYPRtPGTPk_T7 T16_2	P20357	Microtubule-associated protein 2 OS=Mus musculus GN=Map2 PE=1 SV=2	tPGTPGtPSYPRtPGTPk	2	T7(Phospho): 66.44; T16(Phospho): 82.93	T7.T16	T1623.T1632	RTPGTPGTPSYPRTP.SYPRTPGTPKSGILV	0.0791913	2.03261	1	0.0646015	0.162514	0.0364903	0.0708391	0.124941	0.0757922	0.167679	0.190084	0.178043	0.0878685	0.0905241	0.178602
tPGtPkSGILVPSEk_T4 S7_2	P20357	Microtubule-associated protein 2 OS=Mus musculus GN=Map2 PE=1 SV=2	tPGtPkSGILVPSEk	2	T4(Phospho): 99.41; S7(Phospho): 100	T4.S7	T1632.S1635	SYPRTPGTPKSGILV.RTPGTPKSGILVPSE	0.269126	2.13453	1	0.0289663	0.21477	0.0139998	0.042454	0.148019	0.0354712	0.166082	0.189481	0.194584	0.0859121	0.0753149	0.183382
tPGtPkSGILVPSEkk_T4 S7_2	P20357	Microtubule-associated protein 2 OS=Mus musculus GN=Map2 PE=1 SV=2	tPGtPkSGILVPSEkk	2	T4(Phospho): 99.26; S7(Phospho): 99.99	T4.S7	T1632.S1635	SYPRTPGTPKSGILV.RTPGTPKSGILVPSE	0.172899	2.24528	1	0.0194013	0.206946	0.0266308	0.0460045	0.131804	0.0341821	0.158401	0.198181	0.211425	0.084326	0.0706634	0.189336
tPPGSGEPPkSGERsGYsSPGSPGTPGSR_S15 Y17_2	P10637-2	Isoform Tau-A of Microtubule-associated protein tau OS=Mus musculus GN=Mapt	tPPGSGEPPkSGERsGYsSPGSPGTPGSR	2	S15(Phospho): 69.37; Y17(Phospho): 69.13	S15.Y17	S184.Y186	PPKSGERSGYSSPGS.KSGERSGYSSPGSPG	0.155087	1.33955	1	0.0842218	0.141599	0.128097	0.0885618	0.10334	0.0648646	0.138073	0.148672	0.187347	0.117973	0.0855888	0.15803
tQDGVALEIQPLNsQEGLDSEDkEkk_S20_1	E9Q828	Calcium-transporting ATPase OS=Mus musculus GN=Atp2b4 PE=1 SV=1	tQDGVALEIQPLNsQEGLDSEDkEkk	1	S20(Phospho): 96.53	S20	S335	NSQEGLDSEDKEKKI	0.110911	1.9167	1	0.0440799	0.157038	0.06838	0.0868666	0.0932744	0.104329	0.130867	0.184345	0.201333	0.0898325	0.0948232	0.172182
tRPGAVsPLNsPLSTTFPSPFGk_S7 S11_2	Q0KL02-4	Isoform 4 of Triple functional domain protein OS=Mus musculus GN=Trio	tRPGAVsPLNsPLSTTFPSPFGk	2	S7(Phospho): 97.18; S11(Phospho): 94.22	S7.S11	S2458.S2462	KTRPGAVSPLNSPLS.GAVSPLNSPLSTTFP	0.223803	1.6634	1	0.0667844	0.171147	0.0533834	0.0788634	0.123372	0.0531262	0.152474	0.171316	0.160786	0.0971051	0.0851204	0.161525
tRPGAVsPLNsPLSTTFPSPFGk_T1 S11_2	Q0KL02-4	Isoform 4 of Triple functional domain protein OS=Mus musculus GN=Trio	tRPGAVsPLNsPLSTTFPSPFGk	2	T1(Phospho): 88.65; S11(Phospho): 98.12	T1.S11	T2452.S2462	GSLPLGKTRPGAVSP.GAVSPLNSPLSTTFP	0.19859	1.7127	1	0.0656772	0.180427	0.0392224	0.0630587	0.131008	0.0484366	0.15799	0.17822	0.152469	0.095109	0.0808343	0.162893
tRtDSYSAGQSVEILDGVELGEPAHkk_S11_1	Q9JLN9	Serine/threonine-protein kinase mTOR OS=Mus musculus GN=Mtor PE=1 SV=2	tRtDSYSAGQSVEILDGVELGEPAHkk	1	S11(Phospho): 95.65	S11	S2454	DSYSAGQSVEILDGV	0.179308	1.59086	1	0.0762736	0.170082	0.0558987	0.0718885	0.124031	0.0522941	0.139852	0.170763	0.170232	0.100752	0.0827379	0.160282
tRTPEERPkWPQEQVcNGLEQPR_T3_1	P98084	Amyloid beta A4 precursor protein-binding family A member 2 OS=Mus musculus GN=Apba2 PE=1 SV=2	tRTPEERPkWPQEQVcNGLEQPR	1	T3(Phospho): 88	T3	T307	GLKTKTRTPEERPKW	0.185804	1.54474	1	0.0730406	0.169279	0.0657407	0.106116	0.106016	0.0791803	0.144448	0.151676	0.179749	0.102687	0.0971039	0.158624
tsPcQsPTVPEYSAPSLPIRPSR_S2 S6_2	D3Z656	Synaptojanin-1 OS=Mus musculus GN=Synj1 PE=1 SV=1	tsPcQsPTVPEYSAPSLPIRPSR	2	S2(Phospho): 97.88; S6(Phospho): 99.61	S2.S6	S1089.S1093	PSSSPRTSPCQSPTV.PRTSPCQSPTVPEYS	0.132616	1.6895	1	0.0766305	0.165891	0.051756	0.0738472	0.131382	0.0596771	0.14701	0.174751	0.17542	0.0980923	0.088302	0.165727
tsPcQsPTVPEYSAPSLPIRPSR_T1 S2 S6_2	D3Z656	Synaptojanin-1 OS=Mus musculus GN=Synj1 PE=1 SV=1	tsPcQsPTVPEYSAPSLPIRPSR	2	T1(Phospho): 50; S2(Phospho): 50; S6(Phospho): 99.41	T1.S2.S6	T1088.S1089.S1093	SPSSSPRTSPCQSPT.PSSSPRTSPCQSPTV.PRTSPCQSPTVPEYS	0.368082	1.33459	1	0.08649	0.186199	0.0720127	0.0869062	0.114901	0.0584885	0.128944	0.163597	0.167493	0.1149	0.0867652	0.153345
tSPcQSPTVPEYSAPSLPIRPsRAPSR_S22_1	D3Z656	Synaptojanin-1 OS=Mus musculus GN=Synj1 PE=1 SV=1	tSPcQSPTVPEYSAPSLPIRPsRAPSR	1	S22(Phospho): 84.47	S22	S1109	PSLPIRPSRAPSRTP	0.094903	1.77648	1	0.0799361	0.153479	0.0565222	0.112277	0.0934548	0.0799503	0.162762	0.145486	0.20682	0.0966458	0.0952272	0.171689
tsSFRQILPR_T1 S2 S3_1	F6SEU4	Ras/Rap GTPase-activating protein SynGAP OS=Mus musculus GN=Syngap1 PE=1 SV=2	tsSFRQILPR	1	T1(Phospho): 33.33; S2(Phospho): 33.33; S3(Phospho): 33.33	T1	T153	SQPKLDRTSSFRQIL	0.161033	1.52787	1	0.0726313	0.165707	0.0710806	0.0653243	0.105616	0.0895745	0.148446	0.166097	0.158209	0.10314	0.0868383	0.157584
tSSSsPLsSPSkSPVLSSSASSSALSSAkPFMSLVk_S5 S8 S9_2	Q6ZPJ0	Testis-expressed protein 2 OS=Mus musculus GN=Tex2 PE=1 SV=2	tSSSsPLsSPSkSPVLSSSASSSALSSAkPFMSLVk	2	S5(Phospho): 76.69; S8(Phospho): 46.29; S9(Phospho): 46.29	S5.S8.S9	S161.S164.S165	EQKTSSSSPLSSPSK.TSSSSPLSSPSKSPV.SSSSPLSSPSKSPVL	0.0736801	1.91931	1	0.0622933	0.152855	0.06425	0.0939162	0.115875	0.0580961	0.14195	0.187175	0.207125	0.0931327	0.0892958	0.17875
tTETRRsQEVTDFLAPLQTSSR_T1 T2_1	Q9QYX7	Protein piccolo OS=Mus musculus GN=Pclo PE=1 SV=4	tTETRRsQEVTDFLAPLQTSSR	1	T1(Phospho): 41.23; T2(Phospho): 41.23	T1	T4010	KTDRLLRTTETRRSQ	0.168297	1.46119	1	0.0817071	0.16138	0.0866135	0.0572632	0.128385	0.0716924	0.167831	0.183386	0.130537	0.1099	0.08578	0.160585
tTSTsNPsSPAPDWYkDFVTDTDAEVLEHSGk_S5 S8 S9_2	Q61687	Transcriptional regulator ATRX OS=Mus musculus GN=Atrx PE=1 SV=3	tTSTsNPsSPAPDWYkDFVTDTDAEVLEHSGk	2	S5(Phospho): 98.25; S8(Phospho): 50.01; S9(Phospho): 50.01	S5.S8.S9	S1975.S1978.S1979	ESKTTSTSNPSSPAP.TTSTSNPSSPAPDWY.TSTSNPSSPAPDWYK	0.0933975	1.48159	1	0.0943074	0.14378	0.0883715	0.0790596	0.123163	0.10124	0.166255	0.157889	0.159534	0.10882	0.101154	0.161226
tVSVPSEGQFPEYPQEGTTkLEVPAERsPR_S3 S28_2	E9PW37	RAS protein activator-like 2 OS=Mus musculus GN=Rasal2 PE=1 SV=1	tVSVPSEGQFPEYPQEGTTkLEVPAERsPR	2	S3(Phospho): 96.64; S28(Phospho): 99.97	S3.S28	S133.S158	RCLRRTVSVPSEGQF.LEVPAERSPRRRSIS	0.207643	1.50797	1	0.0791001	0.169053	0.0646934	0.0812703	0.108846	0.0562095	0.131104	0.175118	0.165541	0.104282	0.0821086	0.157254
tYSAPAINAIQGGAFEsPkk_T1 S17_2	D3YTT6	Oxysterol-binding protein OS=Mus musculus GN=Osbpl3 PE=1 SV=1	tYSAPAINAIQGGAFEsPkk	2	T1(Phospho): 89.64; S17(Phospho): 100	T1.S17	T248.S264	SMDVLHRTYSAPAIN.IQGGAFESPKKEKRP	0.123703	1.71386	1	0.0670568	0.148405	0.0657961	0.0749113	0.0865038	0.0991622	0.133327	0.201766	0.146943	0.0937525	0.0868591	0.160679
vAIIRtPPksPAtPk_T6 S10 T13_3	P20357	Microtubule-associated protein 2 OS=Mus musculus GN=Map2 PE=1 SV=2	vAIIRtPPksPAtPk	3	T6(Phospho): 100; S10(Phospho): 100; T13(Phospho): 100	T6.S10.T13	T1650.S1654.T1657	KKVAIIRTPPKSPAT.IIRTPPKSPATPKQL.TPPKSPATPKQLRLI	0.148031	2.28681	1	0.0211776	0.183902	0.0368379	0.0788605	0.114365	0.0517728	0.132639	0.214573	0.206007	0.0806392	0.081666	0.184406
vDIVSPGGDNAGsLRkVETISSGk_S13_1	Q3UNH4	G protein-regulated inducer of neurite outgrowth 1 OS=Mus musculus GN=Gprin1 PE=1 SV=2	vDIVSPGGDNAGsLRkVETISSGk	1	S13(Phospho): 86.61	S13	S190	PGGDNAGSLRKVETI	0.417061	1.21444	1	0.113662	0.183517	0.0855388	0.0683418	0.0960918	0.083059	0.169544	0.154039	0.141202	0.127572	0.0824975	0.154928
vDIVSPGGDNAGsLRkVETISSGk_S21_1	Q3UNH4	G protein-regulated inducer of neurite outgrowth 1 OS=Mus musculus GN=Gprin1 PE=1 SV=2	vDIVSPGGDNAGsLRkVETISSGk	1	S21(Phospho): 79.07	S21	S198	LRKVETISSGKMDPK	0.682257	1.15232	1	0.0982266	0.21259	0.0798465	0.103398	0.07608	0.0553511	0.116952	0.175831	0.157388	0.130221	0.0782764	0.150057
vFsLDVPDHPtPTGLAk_S3 T11_2	Q68FM6	Protein phosphatase 1 regulatory subunit 29 OS=Mus musculus GN=Elfn2 PE=1 SV=1	vFsLDVPDHPtPTGLAk	2	S3(Phospho): 100; T11(Phospho): 90.87	S3.T11	S647.T655	IKSAKVFSLDVPDHP.LDVPDHPTPTGLAKS	0.115046	1.70436	1	0.0764245	0.157505	0.0515901	0.0687254	0.135128	0.0552099	0.178269	0.163218	0.145142	0.0951732	0.0863543	0.16221
vQSLEGEkLsPksDISPLTPR_S10 S13_2	P14873	Microtubule-associated protein 1B OS=Mus musculus GN=Map1b PE=1 SV=2	vQSLEGEkLsPksDISPLTPR	2	S10(Phospho): 98.65; S13(Phospho): 82.56	S10.S13	S1775.S1778	SLEGEKLSPKSDISP.GEKLSPKSDISPLTP	0.0951314	2.04226	1	0.0447113	0.163606	0.0546867	0.0784284	0.106729	0.0914231	0.14392	0.192974	0.200228	0.0876679	0.0921934	0.179041
vVSsTsEEEEAFTEkFLk_S3 S6_2	Q4KMM3	Oxidation resistance protein 1 OS=Mus musculus GN=Oxr1 PE=1 SV=3	vVSsTsEEEEAFTEkFLk	2	S3(Phospho): 88.08; S6(Phospho): 93.4	S3.S6	S201.S204	IRPARVVSSTSEEEE.ARVVSSTSEEEEAFT	0.0882118	1.78396	1	0.120775	0.12796	0.0446338	0.116521	0.0916285	0.0824315	0.187889	0.132614	0.202853	0.0977896	0.0968602	0.174452
ySDVEVPASVTGHSFASDGDsGTcsPLRHSFQk_S21 T23_2	F8WGR0	Alpha-adducin OS=Mus musculus GN=Add1 PE=1 SV=1	ySDVEVPASVTGHSFASDGDsGTcsPLRHSFQk	2	S21(Phospho): 93.73; T23(Phospho): 93.73	S21.T23	S427.T429	SFASDGDSGTCSPLR.ASDGDSGTCSPLRHS	0.0532174	2.03527	1	0.0697001	0.139113	0.0660302	0.0988097	0.0762862	0.069569	0.141472	0.187847	0.230063	0.0916146	0.081555	0.186461
ySDVEVPASVTGHSFASDGDSGTcsPLRHsFQk_S25 S30_2	F8WGR0	Alpha-adducin OS=Mus musculus GN=Add1 PE=1 SV=1	ySDVEVPASVTGHSFASDGDSGTcsPLRHsFQk	2	S25(Phospho): 85.75; S30(Phospho): 99.54	S25.S30	S431.S436	DGDSGTCSPLRHSFQ.TCSPLRHSFQKQQRE	0.0927901	1.78617	1	0.0745241	0.161495	0.0571123	0.0866985	0.0891687	0.0774371	0.148593	0.193006	0.181983	0.0977104	0.0844347	0.174527
aTsPLIEETPIGsIkDk_T2 S13_2	Q8C8R3-2	Isoform 2 of Ankyrin-2 OS=Mus musculus GN=Ank2	aTsPLIEETPIGsIkDk	2	T2(Phospho): 91.83; S13(Phospho): 99.99	T2.S13	T1749.S1760	PLPTAKATSPLIEET.IEETPIGSIKDKVKA	0.333169	1.77659	1	0.0453921	0.216855	0.0213983	0.0469379	0.141746	0.0277027	0.178587	0.206541	0.118796	0.0945485	0.072129	0.167974
atSPLIEETPIGsIkDk_T2 S3 S13_2	Q8C8R3-2	Isoform 2 of Ankyrin-2 OS=Mus musculus GN=Ank2	atSPLIEETPIGsIkDk	2	T2(Phospho): 49.99; S3(Phospho): 49.99; S13(Phospho): 99.99	T2.S3.S13	T1749.S1750.S1760	PLPTAKATSPLIEET.LPTAKATSPLIEETP.IEETPIGSIKDKVKA	0.348406	1.73438	1	0.0465824	0.226433	0.025244	0.0251534	0.14037	0.0172465	0.18682	0.208032	0.122443	0.0994197	0.0609233	0.172432
dAsPGRGsHSQSSSPGALTLGR_S8 S10 S12_2	O88935	Synapsin-1 OS=Mus musculus GN=Syn1 PE=1 SV=2	dAsPGRGsHSQSSSPGALTLGR	2	S8(Phospho): 93; S10(Phospho): 42.01; S12(Phospho): 42.01	S8.S10.S12	S432.S434.S436	DASPGRGSHSQSSSP.SPGRGSHSQSSSPGA.GRGSHSQSSSPGALT	0.182016	2.01025	1	0.0315842	0.166048	0.0683536	0.0875238	0.0708446	0.0508872	0.104594	0.233844	0.196261	0.088662	0.0697519	0.178233
dLWPMVSPEDTQsLSFSEESPSkETSLDISSk_S15_1	A2ARP8	Microtubule-associated protein 1A OS=Mus musculus GN=Map1a PE=1 SV=1	dLWPMVSPEDTQsLSFSEESPSkETSLDISSk	1	S15(Phospho): 84.19	S15	S1423	PEDTQSLSFSEESPS	0.195187	2.2413	1	0.0638902	0.175879	0.0265745	0.0363054	0.141382	0.0245655	0.308758	0.148014	0.140184	0.0887812	0.0674176	0.198985
dSLTLPFQFsSEk_S10_1	Q99L85	Elongator complex protein 5 OS=Mus musculus GN=Elp5 PE=2 SV=1	dSLTLPFQFsSEk	1	S10(Phospho): 94.45	S10	S260	LTLPFQFSSEKQKAL	0.24733	1.79653	1	0.0596891	0.200165	0.0303303	0.0350762	0.134738	0.0375129	0.161066	0.21701	0.143248	0.0967282	0.0691091	0.173775
dWFIEMPTESkkDEWGLAAPIsPGPLTPmR_S22_1	P20357	Microtubule-associated protein 2 OS=Mus musculus GN=Map2 PE=1 SV=2	dWFIEMPTESkkDEWGLAAPIsPGPLTPmR	1	S22(Phospho): 85.95	S22	S283	WGLAAPISPGPLTPM	0.145671	1.99097	1	0.0623322	0.181995	0.0314853	0.0648721	0.150309	0.0302295	0.220641	0.180876	0.147617	0.0919373	0.0818035	0.183045
fSsPHQsLLSIR_S2 S3 S10_2	A0A0J9YTW6	Sodium channel protein OS=Mus musculus GN=Scn2a PE=1 SV=1	fSsPHQsLLSIR	2	S2(Phospho): 50; S3(Phospho): 50; S10(Phospho): 98.78	S2.S3.S10	S553.S554.S561	LTYEKRFSSPHQSLL.TYEKRFSSPHQSLLS.SPHQSLLSIRGSLFS	0.15633	2.52617	1	0.039315	0.180422	0.00993396	0.0584844	0.137327	0.0174607	0.194764	0.189177	0.196247	0.076557	0.0710906	0.193396
iGsLDNITHVPGGGNk_S3_1	P10637-2	Isoform Tau-A of Microtubule-associated protein tau OS=Mus musculus GN=Mapt	iGsLDNITHVPGGGNk	1	S3(Phospho): 99.96	S3	S345	RVQSKIGSLDNITHV	0.175821	1.82815	1	0.0615995	0.168679	0.0508011	0.0553379	0.116441	0.057087	0.13844	0.228194	0.147222	0.0936933	0.0762887	0.171286
iGsTTNPFLDIPHDPNAAVYk_S3_1	E9PUC5	PH and SEC7 domain-containing protein 3 OS=Mus musculus GN=Psd3 PE=1 SV=1	iGsTTNPFLDIPHDPNAAVYk	1	S3(Phospho): 89.77	S3	S98	KTISRIGSTTNPFLD	0.176878	1.9054	1	0.0618251	0.173903	0.0354736	0.0474171	0.131081	0.0446593	0.119779	0.203744	0.193225	0.0904006	0.0743857	0.172249
lTNALVGMsPsSSLSALSSR_S9 S13 S15_2	A0A087WQE8	Kinesin-like protein KIF1A OS=Mus musculus GN=Kif1a PE=1 SV=1	lTNALVGMsPsSSLSALSSR	2	S9(Phospho): 99.99; S13(Phospho): 47.77; S15(Phospho): 47.77	S9.S13.S15	S411.S415.S417	TNALVGMSPSSSLSA.VGMSPSSSLSALSSR.MSPSSSLSALSSRAA	0.140096	1.30793	1	0.112757	0.148745	0.0924387	0.0830524	0.122293	0.0307033	0.176095	0.145522	0.141313	0.11798	0.0786828	0.15431
nAGQVVSPQSAPAcAENkNDVsRENsTVDFSk_S22 S26_2	Q5DTL9	Sodium-driven chloride bicarbonate exchanger OS=Mus musculus GN=Slc4a10 PE=1 SV=2	nAGQVVSPQSAPAcAENkNDVsRENsTVDFSk	2	S22(Phospho): 72.27; S26(Phospho): 74.91	S22.S26	S276.S280	AENKNDVSRENSTVD.NDVSRENSTVDFSKG	0.274223	1.7317	1	0.0410699	0.190752	0.0588364	0.0647391	0.101543	0.0836986	0.129941	0.227265	0.146126	0.0968861	0.0833271	0.167777
nNTVIDELPFksPVTk_S12_1	Q3ZB57	GRB2-associated-binding protein 2 OS=Mus musculus GN=Gab2 PE=1 SV=1	nNTVIDELPFksPVTk	1	S12(Phospho): 100	S12	S532	IDELPFKSPVTKSWS	0.19863	2.08558	1	0.0524066	0.18297	0.0202032	0.0477276	0.109996	0.0536785	0.117151	0.233559	0.182322	0.0851933	0.0704674	0.177677
qQsFGVkPPPsPLSPVPSVVk_S3 S11 S14_2	F2Z3U3	Ras association (RalGDS/AF-6) and pleckstrin homology domains 1 OS=Mus musculus GN=Raph1 PE=1 SV=2	qQsFGVkPPPsPLSPVPSVVk	2	S3(Phospho): 100; S11(Phospho): 49.61; S14(Phospho): 49.61	S3.S11.S14	S850.S858.S861	PTLPKQQSFGVKPPP.FGVKPPPSPLSPVPS.KPPPSPLSPVPSVVK	0.134451	1.76175	1	0.0845137	0.167785	0.0360345	0.0613974	0.148276	0.0459577	0.165718	0.1828	0.159454	0.0961111	0.0852102	0.169324
sASVLSkSDsQAsLTVPLSPHVVR_S10 S13_2	Q3UMB5	Guanine nucleotide exchange protein SMCR8 OS=Mus musculus GN=Smcr8 PE=1 SV=2	sASVLSkSDsQAsLTVPLSPHVVR	2	S10(Phospho): 99.6; S13(Phospho): 97.66	S10.S13	S488.S491	SVLSKSDSQASLTVP.SKSDSQASLTVPLSP	0.25884	1.50049	1	0.135578	0.149955	0.0538903	0.076374	0.107548	0.0518568	0.231359	0.144738	0.133203	0.113141	0.0785931	0.169767
sFkLSGFSFk_S1_1	P26645	Myristoylated alanine-rich C-kinase substrate OS=Mus musculus GN=Marcks PE=1 SV=2	sFkLSGFSFk	1	S1(Phospho): 100	S1	S156	KRFSFKKSFKLSGFS	0.207835	1.53064	1	0.0829605	0.174977	0.101068	0.112294	0.0613051	0.0948201	0.174719	0.133156	0.241633	0.119668	0.0894731	0.183169
sIDkTEVcPWEIHSQSLLEDENRLISk_T5_1	Q8C419	Probable G-protein coupled receptor 158 OS=Mus musculus GN=Gpr158 PE=1 SV=2	sIDkTEVcPWEIHSQSLLEDENRLISk	1	T5(Phospho): 77.92	T5	T1063	NHKSIDKTEVCPWEI	0.964611	0.984539	1	0.087303	0.21591	0.126225	0.0895203	0.0538154	0.0541234	0.100146	0.192896	0.129756	0.143146	0.0658197	0.140933
sILDDsFkLLSLkQ_S1 S6_2	Q9Z0Z4	Hephaestin OS=Mus musculus GN=Heph PE=1 SV=3	sILDDsFkLLSLkQ	2	S1(Phospho): 100; S6(Phospho): 100	S1.S6	S1144.S1149	KLRRNRRSILDDSFK.RRSILDDSFKLLSLK	0.933112	1.04061	1	0.142543	0.271258	0.0496875	0.0585187	0.100836	0.075084	0.210283	0.160128	0.111901	0.154496	0.0781464	0.160771
sksEEAHAEDSVMDHHFR_S3_1	Q9CY58	Plasminogen activator inhibitor 1 RNA-binding protein OS=Mus musculus GN=Serbp1 PE=1 SV=2	sksEEAHAEDSVMDHHFR	1	S3(Phospho): 88.15	S3	S329	FVLHKSKSEEAHAED	0.368146	1.55314	1	0.0610053	0.206261	0.0824226	0.0486487	0.089283	0.0994115	0.142612	0.270143	0.13036	0.116563	0.0791144	0.181038
sNSPLPsIQLQPQsPSASk_S1 S3 S14_2	F7BJK1	Protocadherin 1 (Fragment) OS=Mus musculus GN=Pcdh1 PE=1 SV=1	sNSPLPsIQLQPQsPSASk	2	S1(Phospho): 49.99; S3(Phospho): 49.99; S14(Phospho): 99.45	S1.S3.S14	S810.S812.S823	DLGRHYRSNSPLPSI.GRHYRSNSPLPSIQL.SIQLQPQSPSASKKH	0.72343	1.18012	1	0.0665634	0.244319	0.0818039	0.0664892	0.106759	0.0336616	0.126245	0.204065	0.133106	0.130896	0.0689701	0.154472
sNSPLPsIQLQPQsPSASk_S3 S14_2	F7BJK1	Protocadherin 1 (Fragment) OS=Mus musculus GN=Pcdh1 PE=1 SV=1	sNSPLPsIQLQPQsPSASk	2	S3(Phospho): 87.49; S14(Phospho): 97.79	S3.S14	S812.S823	GRHYRSNSPLPSIQL.SIQLQPQSPSASKKH	0.531888	1.4051	1	0.054416	0.246016	0.0451847	0.0549957	0.131008	0.0387452	0.161329	0.195852	0.128445	0.115205	0.0749163	0.161875
sNSPLPsIQLQPQsPSASkk_S1 S3 S14_2	F7BJK1	Protocadherin 1 (Fragment) OS=Mus musculus GN=Pcdh1 PE=1 SV=1	sNSPLPsIQLQPQsPSASkk	2	S1(Phospho): 49.72; S3(Phospho): 49.72; S14(Phospho): 98.76	S1.S3.S14	S810.S812.S823	DLGRHYRSNSPLPSI.GRHYRSNSPLPSIQL.SIQLQPQSPSASKKH	0.155767	1.99597	1	0.0528295	0.188333	0.0294677	0.0608567	0.154056	0.0370345	0.188692	0.198796	0.152681	0.0902101	0.0839825	0.180056
sPSVSPDRGStPtSPYSVPQIAPLPSSTLcPIck_S14 Y16_2	O88737	Protein bassoon OS=Mus musculus GN=Bsn PE=1 SV=4	sPSVSPDRGStPtSPYSVPQIAPLPSSTLcPIck	2	S14(Phospho): 76.1; Y16(Phospho): 76.1	S14.Y16	S151.Y153	DRGSTPTSPYSVPQI.GSTPTSPYSVPQIAP	0.368812	1.55083	1	0.0728625	0.215088	0.0315474	0.0575734	0.134118	0.0280051	0.157183	0.196796	0.141509	0.106499	0.0732322	0.165163
sRsLsSIVGLSGVSLR_S3 S6_2	E9QKI2	Potassium voltage-gated channel subfamily C member 3 OS=Mus musculus GN=Kcnc3 PE=1 SV=1	sRsLsSIVGLSGVSLR	2	S3(Phospho): 99.48; S6(Phospho): 93.72	S3.S6	S732.S735	KGYEKSRSLSSIVGL.EKSRSLSSIVGLSGV	0.181703	1.73238	1	0.133207	0.1295	0.0260469	0.0797779	0.115383	0.0383522	0.170695	0.168536	0.160999	0.0962513	0.0778377	0.166743
sSHLPTEVTEkPQAVPVsFEFSEAkDENER_S22_1	P14873	Microtubule-associated protein 1B OS=Mus musculus GN=Map1b PE=1 SV=2	sSHLPTEVTEkPQAVPVsFEFSEAkDENER	1	S22(Phospho): 85.5	S22	S1361	VPVSFEFSEAKDENE	0.421632	1.73636	1	0.0312866	0.253079	0.0199601	0.0125037	0.120191	0.0405619	0.145833	0.245661	0.136925	0.101442	0.0577523	0.176139
tPsPPEEPsPLPsPTASPNHTLAPASPAPVRPR_T1 S9 S13_3	A0A0G2JEG8	Amphiphysin OS=Mus musculus GN=Amph PE=1 SV=1	tPsPPEEPsPLPsPTASPNHTLAPASPAPVRPR	3	T1(Phospho): 82.18; S9(Phospho): 99.85; S13(Phospho): 67.62	T1.S9.S13	T260.S268.S272	GPLRIAKTPSPPEEP.PSPPEEPSPLPSPTA.EEPSPLPSPTASPNH	0.405805	1.5216	1	0.0540167	0.205423	0.058149	0.0660655	0.107372	0.0474723	0.127058	0.226138	0.130046	0.105863	0.0736365	0.161081
tSLPQHVMEPPVGAAAAGTSGSSLDSFSkGsLk_S22 S26_1	A0A0N4SVB5	Proline-rich transmembrane protein 3 OS=Mus musculus GN=Prrt3 PE=1 SV=1	tSLPQHVMEPPVGAAAAGTSGSSLDSFSkGsLk	1	S22(Phospho): 42.63; S26(Phospho): 42.63	S22	S895	AAAGTSGSSLDSFSK	0.261047	1.58264	1	0.075046	0.179567	0.0534003	0.0584162	0.123328	0.0550108	0.118405	0.200886	0.168182	0.102671	0.0789183	0.162491
tSLPQHVMEPPVGAAAAGTSGSsLDsFSkGSLk_S22 S26_2	A0A0N4SVB5	Proline-rich transmembrane protein 3 OS=Mus musculus GN=Prrt3 PE=1 SV=1	tSLPQHVMEPPVGAAAAGTSGSsLDsFSkGSLk	2	S22(Phospho): 86.82; S26(Phospho): 80.54	S22.S26	S895.S899	AAAGTSGSSLDSFSK.TSGSSLDSFSKGSLK	0.25761	1.56855	1	0.0821681	0.179195	0.0576296	0.076338	0.0740604	0.0638656	0.134583	0.220194	0.145579	0.106331	0.0714213	0.166785
vAIIRtPPkSPAtPk_T6 S10 T13_2	P20357	Microtubule-associated protein 2 OS=Mus musculus GN=Map2 PE=1 SV=2	vAIIRtPPkSPAtPk	2	T6(Phospho): 99.99; S10(Phospho): 50.01; T13(Phospho): 50.01	T6.S10.T13	T1650.S1654.T1657	KKVAIIRTPPKSPAT.IIRTPPKSPATPKQL.TPPKSPATPKQLRLI	0.0849236	2.0348	1	0.0482335	0.164645	0.0505644	0.0731604	0.152299	0.0424004	0.162375	0.174864	0.198814	0.0878143	0.0892868	0.178684
vGsLDNAHHVPGGGNVk_S3_1	P20357	Microtubule-associated protein 2 OS=Mus musculus GN=Map2 PE=1 SV=2	vGsLDNAHHVPGGGNVk	1	S3(Phospho): 100	S3	S1743	KAQAKVGSLDNAHHV	0.136668	1.95127	1	0.0633454	0.167334	0.042536	0.0528674	0.141189	0.0480915	0.149533	0.229933	0.153651	0.0910719	0.0807161	0.177706
sAsAPAsPREmISLk_S1 S3 S7_2	O35927	Catenin delta-2 OS=Mus musculus GN=Ctnnd2 PE=1 SV=1	sAsAPAsPREmISLk	2	S1(Phospho): 50.01; S3(Phospho): 50.01; S7(Phospho): 99.72	S1.S3.S7	S1092.S1094.S1098	RVSPNNRSASAPASP.SPNNRSASAPASPRE.RSASAPASPREMISL	0.0371495	0.799877	2	0.136986	0.169616	0.149536	0.107029	0.0887314	0.103134	0.118705	0.12716	0.118989	0.152046	0.0996316	0.121618
sAsAPAsPREmISLk_S3 S7_2	O35927	Catenin delta-2 OS=Mus musculus GN=Ctnnd2 PE=1 SV=1	sAsAPAsPREmISLk	2	S3(Phospho): 98.7; S7(Phospho): 99.97	S3.S7	S1094.S1098	SPNNRSASAPASPRE.RSASAPASPREMISL	0.0384738	0.816489	2	0.140249	0.166421	0.145352	0.108787	0.0911695	0.0987278	0.125397	0.129034	0.114641	0.150674	0.0995615	0.123024
aLQsPEHHIDPIYEDR_S4_1	O35927	Catenin delta-2 OS=Mus musculus GN=Ctnnd2 PE=1 SV=1	aLQsPEHHIDPIYEDR	1	S4(Phospho): 100	S4	S412	PELRALQSPEHHIDP	0.00277354	0.686132	2	0.164193	0.145867	0.157329	0.119163	0.112369	0.129242	0.115806	0.107005	0.0978794	0.155796	0.120258	0.106897
aPPGPLPPAAsPGPPAAsPPAAPsSPR_S11 S18 S25_3	O88703	Potassium/sodium hyperpolarization-activated cyclic nucleotide-gated channel 2 OS=Mus musculus GN=Hcn2 PE=1 SV=1	aPPGPLPPAAsPGPPAAsPPAAPsSPR	3	S11(Phospho): 100; S18(Phospho): 99.93; S25(Phospho): 82.38	S11.S18.S25	S743.S750.S757	GPLPPAASPGPPAAS.SPGPPAASPPAAPSS.SPPAAPSSPRAPRTS	0.000795607	0.63078	2	0.171639	0.156395	0.162934	0.120774	0.108743	0.11605	0.110393	0.0938019	0.105498	0.163656	0.115189	0.103231
aTLSEPGEEPQHPsPP_S14_1	Q60829	Protein phosphatase 1 regulatory subunit 1B OS=Mus musculus GN=Ppp1r1b PE=1 SV=2	aTLSEPGEEPQHPsPP	1	S14(Phospho): 100	S14	S192	GEEPQHPSPP	0.00827733	0.477414	2	0.229322	0.177909	0.177652	0.103772	0.117944	0.119565	0.0917765	0.114499	0.0729559	0.194961	0.11376	0.0930771
eLLsPLsEPDDRYPLIVk_S4 S7_2	Q9ESC8	AF4/FMR2 family member 4 OS=Mus musculus GN=Aff4 PE=1 SV=1	eLLsPLsEPDDRYPLIVk	2	S4(Phospho): 100; S7(Phospho): 100	S4.S7	S698.S701	MEEKELLSPLSEPDD.KELLSPLSEPDDRYP	0.00474636	0.467399	2	0.188952	0.200916	0.196981	0.108724	0.0901356	0.158794	0.0995109	0.117783	0.0569979	0.195616	0.119218	0.0914307
eNMSLPsNLQLNDLtPDLRGk_S4 S7 T15_2	Q9DCF1	Transmembrane protein 25 OS=Mus musculus GN=Tmem25 PE=1 SV=1	eNMSLPsNLQLNDLtPDLRGk	2	S4(Phospho): 50.01; S7(Phospho): 50.01; T15(Phospho): 99.98	S4.S7.T15	S297.S300.T308	RLPRENMSLPSNLQL.RENMSLPSNLQLNDL.NLQLNDLTPDLRGKA	0.0458629	0.822288	2	0.148394	0.139501	0.147729	0.0963086	0.110508	0.101749	0.126379	0.129441	0.102389	0.145208	0.102855	0.119403
eTRHsWDSPAFNNDVVQRR_S5_1	E9QAD8	IQ motif and SEC7 domain-containing protein 2 OS=Mus musculus GN=Iqsec2 PE=1 SV=1	eTRHsWDSPAFNNDVVQRR	1	S5(Phospho): 86.98	S5	S741	YQRETRHSWDSPAFN	0.00951898	0.653344	2	0.177036	0.14936	0.177927	0.141505	0.0715646	0.104831	0.118735	0.0933841	0.117377	0.168108	0.105967	0.109832
eVSPDSsEAEELSDcLHRLDSLTHk_S21 T23_1	A2AEM2	Chloride channel CLIC-like 1, isoform CRA_a OS=Mus musculus GN=Clcc1 PE=1 SV=1	eVSPDSsEAEELSDcLHRLDSLTHk	1	S21(Phospho): 47.03; T23(Phospho): 47.03	S21	S78	DCLHRLDSLTHKVDS	0.0055521	0.441063	2	0.208349	0.200783	0.218634	0.156178	0.0641941	0.13592	0.132735	0.081086	0.0630636	0.209255	0.118764	0.0922948
gLHkQPGFPQPSPSDDPSLsPR_S20_1	Q91VC7	Protein phosphatase 1 regulatory subunit 14A OS=Mus musculus GN=Ppp1r14a PE=1 SV=1	gLHkQPGFPQPSPSDDPSLsPR	1	S20(Phospho): 90.22	S20	S136	PSDDPSLSPRQDRAH	0.011044	0.596947	2	0.18463	0.151035	0.178633	0.11647	0.102889	0.147925	0.121561	0.103561	0.0818866	0.171433	0.122428	0.102336
gLHkQPGFPQPSPSDDPSLsPRQDR_S20_1	Q91VC7	Protein phosphatase 1 regulatory subunit 14A OS=Mus musculus GN=Ppp1r14a PE=1 SV=1	gLHkQPGFPQPSPSDDPSLsPRQDR	1	S20(Phospho): 88.79	S20	S136	PSDDPSLSPRQDRAH	0.00536371	0.576615	2	0.168888	0.175394	0.212214	0.114194	0.0645683	0.130764	0.106183	0.115576	0.0991244	0.185498	0.103175	0.106961
gRRsPVLLPk_S4_1	Q921C5-2	Isoform 2 of Protein bicaudal D homolog 2 OS=Mus musculus GN=Bicd2	gRRsPVLLPk	1	S4(Phospho): 100	S4	S578	PEGRGRRSPVLLPKG	0.00637692	0.510028	2	0.194283	0.151775	0.201289	0.146733	0.0992983	0.117923	0.101863	0.0986401	0.0786593	0.182449	0.121318	0.0930541
kIVDSGVQtDDEETADRTYASR_T9_1	Q9QYX7	Protein piccolo OS=Mus musculus GN=Pclo PE=1 SV=4	kIVDSGVQtDDEETADRTYASR	1	T9(Phospho): 99.65	T9	T3376	IVDSGVQTDDEETAD	0.0214205	0.668079	2	0.152229	0.176812	0.178378	0.106693	0.0826671	0.106518	0.111633	0.113637	0.113726	0.16914	0.0986263	0.112999
kQHsDPVcPSHAGAGYSYSPQPSRPGSLGTSPTk_S4_1	Q9QY01	Serine/threonine-protein kinase ULK2 OS=Mus musculus GN=Ulk2 PE=1 SV=1	kQHsDPVcPSHAGAGYSYSPQPSRPGSLGTSPTk	1	S4(Phospho): 91.94	S4	S547	QKLRKQHSDPVCPSH	0.0102598	0.575805	2	0.169388	0.167763	0.199601	0.0975069	0.122738	0.111214	0.112817	0.0772936	0.118953	0.178917	0.110486	0.103021
kVAAGHELQPLAIVDQRPSsRAsSR_S19 S20 S23 S24_2	P23242	Gap junction alpha-1 protein OS=Mus musculus GN=Gja1 PE=1 SV=2	kVAAGHELQPLAIVDQRPSsRAsSR	2	S19(Phospho): 83.89; S20(Phospho): 38.7; S23(Phospho): 38.7; S24(Phospho): 38.7	S19.S20.S23.S24	S364.S365.S368.S369	AIVDQRPSSRASSRA.IVDQRPSSRASSRAS.QRPSSRASSRASSRP.RPSSRASSRASSRPR	0.00898347	0.600768	2	0.16213	0.156088	0.185008	0.100933	0.12317	0.123248	0.113418	0.110078	0.0788265	0.167742	0.115784	0.100774
[truncated: 9,925 more rows]
