# Supplementary material for: Enhanced activity of Alzheimer disease-associated variant of protein kinase Cα drives cognitive decline in a mouse model
Source: Nat Commun. 2022 Nov 23;13:7200. doi: 10.1038/s41467-022-34679-7 (PMC9684486; doi:10.1038/s41467-022-34679-7)
Supplement: Supplementary file 5 — Supplementary Data 2 [file 41467_2022_34679_MOESM5_ESM.xlsx]

## Sheet: Standard_Proteomics
Protein	Gene	Description	4.5month_WT_WT_Rep1	4.5month_WT_WT_Rep2	4.5month_WT_WT_Rep3	4.5month_HOM_WT_Rep1	4.5month_HOM_WT_Rep2	4.5month_HOM_WT_Rep3	4.5month_WT_APP_Rep1	4.5month_WT_APP_Rep2	4.5month_WT_APP_Rep3	4.5month_HOM_APP_Rep1	4.5month_HOM_APP_Rep2	4.5month_HOM_APP_Rep3	6month_WT_WT_Rep1	6month_WT_WT_Rep2	6month_WT_WT_Rep3	6month_HOM_WT_Rep1	6month_HOM_WT_Rep2	6month_HOM_WT_Rep3	6month_WT_APP_Rep1	6month_WT_APP_Rep2	6month_WT_APP_Rep3	6month_HOM_APP_Rep1	6month_HOM_APP_Rep2	6month_HOM_APP_Rep3
P12023	App	Amyloid beta A4 protein OS=Mus musculus GN=App PE=1 SV=3	324.391	297.951	326.316	310.288	338.616	322.611	974.733	955.385	935.637	973.091	1110.84	1027.32	326.381	355.552	328.636	352.374	317.241	336.655	1025.75	992.371	968.612	1037.79	984.505	917.978
Q9R118	Htra1	Serine protease HTRA1 OS=Mus musculus GN=Htra1 PE=1 SV=2	560.837	514.01	685.694	613.017	617.9	609.284	503.516	503.469	531.787	546.053	491.497	563.362	925.43	858.121	731.014	870.631	791.773	776.604	620.596	652.647	629.064	649.406	667.513	658.745
Q6PGJ3	L1cam	L1 cell adhesion molecule OS=Mus musculus GN=L1cam PE=1 SV=1	646.534	636.377	665.876	624.163	671.434	642.701	543.171	564.595	571.976	582.732	570.21	579.168	712.282	727.978	659.568	659.192	661.724	727.012	599.573	601.218	581.234	583.651	557.958	538.302
O88507	Cntfr	Ciliary neurotrophic factor receptor subunit alpha OS=Mus musculus GN=Cntfr PE=1 SV=2	753.647	754.402	741.022	706.909	798.665	653.932	485.135	469.34	521.258	454.245	505.254	535.594	889.131	809.336	569.603	655.359	779.366	748.923	544.605	531.622	501	555.436	528.63	611.266
Q9ESM3	Hapln2	Hyaluronan and proteoglycan link protein 2 OS=Mus musculus GN=Hapln2 PE=1 SV=1	595.326	615.418	526.951	575.802	586.341	623.017	607.555	597.779	714.519	543.516	613.903	673.503	693.852	923.397	788.937	793.884	721.011	668.515	937.618	891.538	780.718	842.02	759.629	634.474
Q69Z26	Cntn4	Contactin-4 OS=Mus musculus GN=Cntn4 PE=1 SV=2	602.927	629.49	663.886	716.728	666.083	627.895	535.436	563.271	559.968	570.483	576.529	577.841	658.158	687.979	653.874	675.336	643.596	593.341	580.72	564.024	586.079	510.761	578.255	564.791
P56942	Pmch	Pro-MCH OS=Mus musculus GN=Pmch PE=1 SV=2	895.58	757.489	765.441	670.315	663.735	759.106	522.113	379.579	446.294	534.041	344.725	416.608	1043.48	801.55	689.706	857.743	917.966	947.564	548.016	424.614	499.701	502.261	420.14	325.505
Q07235	Serpine2	Glia-derived nexin OS=Mus musculus GN=Serpine2 PE=1 SV=2	606.226	640.812	723.664	627.706	668.037	610.836	557.145	559.074	585.402	561.42	555.854	516.022	693.257	716.418	655.961	626.385	660.529	622.231	548.378	561.746	587.303	604.626	583.634	527.994
E9PV41	Diaph1	Protein diaphanous homolog 1 OS=Mus musculus GN=Diaph1 PE=1 SV=1	679.24	635.157	681.087	684.026	663.852	710.351	633.757	559.69	659.652	551.349	573.525	568.919	738.073	667.156	707.019	662.829	731.331	725.246	559.078	531.41	578.54	649.309	677.854	574.84
E9QK82	Mpz	Myelin protein P0 OS=Mus musculus GN=Mpz PE=1 SV=1	NA	NA	463.219	107.06	327.559	NA	NA	NA	NA	466.065	532.635	NA	NA	NA	NA	424.097	NA	NA	NA	127.044	347.909	NA	NA	NA
Q9QZF2	Gpc1	Glypican-1 OS=Mus musculus GN=Gpc1 PE=1 SV=1	637.229	605.089	691.545	763.216	710.342	677.409	551.677	570.912	529.308	587.984	596.487	607.275	590.742	607.072	678.47	664.392	598.85	693.44	585.069	590.331	553.121	561.619	617.826	535.901
P18242	Ctsd	Cathepsin D OS=Mus musculus GN=Ctsd PE=1 SV=1	583.843	618.894	561.554	600.751	593.355	555.39	565.772	591.664	617.38	610.633	609.646	662.927	719.165	724.827	628.303	655.276	620.129	590.586	687.736	639.188	671.221	634.125	629.615	650.341
Q9JHU4	Dync1h1	Cytoplasmic dynein 1 heavy chain 1 OS=Mus musculus GN=Dync1h1 PE=1 SV=2	614.91	605.503	613.358	604.254	600.919	607.537	619.99	631.843	602.984	618.624	640.839	615.766	588.069	572.481	575.859	586.872	603.493	582.141	631.172	633.44	625.748	615.725	619.485	638.685
F8VQJ3	Lamc1	Laminin subunit gamma-1 OS=Mus musculus GN=Lamc1 PE=1 SV=1	564.898	584.723	539.056	590.021	576.808	514.504	669.164	673.899	677.114	671.979	654.261	714.73	708.085	653.49	630.787	714.413	692.689	656.287	673.827	586.856	650.146	653.361	679.147	737.756
Q3UY21	Mog	Myelin-oligodendrocyte glycoprotein OS=Mus musculus GN=Mog PE=1 SV=1	557.629	536.857	596.875	496.487	580.925	576.46	552.389	552.93	591.696	574.239	619.563	596.228	674.346	730.561	632.179	698.699	642.836	638.123	647.485	636.615	586.692	670.27	604.037	592.544
P51655	Gpc4	Glypican-4 OS=Mus musculus GN=Gpc4 PE=1 SV=2	679.731	647.718	616.853	824.918	742.933	696.382	503.503	607.443	558.205	582.767	647.27	596.092	658.522	669.946	719.364	680.818	723.974	719.001	535.352	538.546	484.641	585.535	518.96	496.73
Q9EPU5	Tnfrsf21	Tumor necrosis factor receptor superfamily member 21 OS=Mus musculus GN=Tnfrsf21 PE=1 SV=2	669.905	661.621	647.436	671.584	660.389	722.903	541.411	527.938	600.961	579.167	559.645	523.998	603.568	674.318	609.386	675.838	656.536	614.357	582.479	556.763	537.02	509.667	600.907	618.661
Q6R0H7	Gnas	Guanine nucleotide-binding protein G(s) subunit alpha isoforms XLas OS=Mus musculus GN=Gnas PE=1 SV=1	619.13	633.865	640.71	624.964	627.273	610.33	597.774	614.206	586.236	579.368	590.36	601.929	673.016	667.449	637.71	621.395	668.866	606.468	607.054	591.796	608.332	596.995	594.071	610.633
P09528	Fth1	Ferritin heavy chain OS=Mus musculus GN=Fth1 PE=1 SV=2	609.478	661.915	626.468	619.959	673.97	569.87	678.877	605.158	687.859	572.811	597.927	669.964	626.756	687.688	723.207	683.213	639.292	699.287	679.742	635.462	674.086	705.172	660.328	583.568
Q8BWU8	Etnppl	Ethanolamine-phosphate phospho-lyase OS=Mus musculus GN=Etnppl PE=2 SV=1	528.113	525.762	727.602	576.455	581.919	437.316	531.202	581.083	604.087	559.489	635.399	537.313	801.402	888.653	691.991	732.672	712.96	727.291	501.147	585.027	647.293	612.457	514.778	591.767
Q07409	Cntn3	Contactin-3 OS=Mus musculus GN=Cntn3 PE=1 SV=2	649.151	651.388	636.412	632.793	621.194	665.745	523.766	528.486	520.822	576.717	483.171	555.357	583.476	675.046	667.731	638.057	595.434	612.444	523.176	486.228	547.082	517.094	557.822	620.581
P10493	Nid1	Nidogen-1 OS=Mus musculus GN=Nid1 PE=1 SV=2	571.151	614.322	610.053	613.585	672.375	576.808	680.656	637.28	669.947	675.111	685.204	716.68	678.862	674.216	642.188	628.136	624.818	573.08	661.485	638.579	581.743	657.436	688.427	667.532
Q7TNR6	Igsf21	Immunoglobulin superfamily member 21 OS=Mus musculus GN=Igsf21 PE=2 SV=1	634.233	682.096	636.826	615.916	652.63	645.651	612.006	584.632	535.683	600.373	544.883	529.734	640.827	625.733	618.772	599.752	629.885	679.401	635.11	552.692	571.307	551.603	592.64	612.045
Q61292	Lamb2	Laminin subunit beta-2 OS=Mus musculus GN=Lamb2 PE=1 SV=2	574.596	608.001	569.206	604.401	639.529	567.028	671.613	683.223	718.761	665.027	686.85	666.651	679.494	692.382	735.062	714.823	646.576	580.227	645.895	649.994	661.366	639.526	773.721	744.755
Z4YKV1	Gnas	Guanine nucleotide-binding protein G(s) subunit alpha isoforms short OS=Mus musculus GN=Gnas PE=1 SV=1	619.926	634.405	642.588	624.517	627.185	608.623	597.111	613.544	584.705	577.776	589.071	603.273	673.036	667.436	638.887	618.922	669.346	605.959	607.516	591.122	609.072	596.699	592.53	611.164
Q62059	Vcan	Versican core protein OS=Mus musculus GN=Vcan PE=1 SV=2	557.711	658.14	625.441	620.612	620.682	646.214	638.304	598.682	644.822	580.196	581.244	580.654	684.132	699.653	685.244	691.812	669.116	707.66	732.362	631.762	645.352	705.641	688.769	633.375
O35114	Scarb2	Lysosome membrane protein 2 OS=Mus musculus GN=Scarb2 PE=1 SV=3	624.707	609.008	639.527	595.892	597.94	616.122	587.839	588.836	641.919	568.129	514.335	510.798	646.114	709.397	608.821	648.439	618.932	710.467	592.507	677.789	647.21	689.509	643.591	620.935
Q91XW9	Pcdhgc5	MCG133388, isoform CRA_f OS=Mus musculus GN=Pcdhgc5 PE=1 SV=1	583.179	532.713	547.599	564.298	549.002	562.172	700.949	729.79	663.128	664.63	743.543	694.912	604.296	616.256	591.538	663.631	676.844	618.086	616.337	676.99	734.387	667.968	635.24	625.101
Q9D9U9	Cfap45	Ccdc19 protein OS=Mus musculus GN=Cfap45 PE=1 SV=1	805.2	693.255	688.513	NA	1527.31	NA	682.482	1002.88	1528.07	844.42	NA	NA	568.926	2202.98	NA	716.133	955.139	647.556	655.908	NA	817.326	639.122	1687.77	782.668
Q9R1T4	2019-09-06	Septin-6 OS=Mus musculus GN=Sept6 PE=1 SV=4	597.236	585.041	570.547	581.545	585.014	560.185	638.332	648.891	619.01	618.397	615.986	623.174	622.393	613.148	588.179	610.799	619.458	624.248	634.903	634.726	634.219	606.518	621.762	600.393
P51830	Adcy9	Adenylate cyclase type 9 OS=Mus musculus GN=Adcy9 PE=1 SV=1	599.814	622.648	634.995	644.68	604.895	645.657	598.611	585.216	588.314	596.877	574.805	584.014	606.24	626.217	642.403	683.014	621.203	653.555	645.667	576.852	624.075	620.121	571.634	531.247
Q91XY9	Pcdhga10	Protocadherin gamma A10 OS=Mus musculus GN=Pcdhga10 PE=2 SV=1	571.927	510.035	555.693	554.86	524.387	561.45	728.721	753.589	692.275	644.898	713.476	632.863	571.107	601.591	583.958	641.564	693.917	633.203	597.239	693.828	717.052	652.8	631.939	598.762
Q63918	Sdpr	Serum deprivation-response protein OS=Mus musculus GN=Sdpr PE=1 SV=3	763.475	705.795	650.052	591.134	548.103	609.711	659.255	683.361	621.929	637.018	645.413	562.591	684.338	750.244	738.601	670.937	705.219	588.336	654.995	677.059	658.613	705.493	600.068	656.197
E9Q3X0	Mvp	Major vault protein OS=Mus musculus GN=Mvp PE=1 SV=1	672.618	621.564	599.199	573.704	633.339	614.901	599.032	586.034	719.709	596.985	594.754	614.543	764.711	771.911	693.663	708.148	726.187	743.427	689.642	648.455	728.72	766.877	677.003	697.729
Q91XY7	Pcdhga12	Protocadherin gamma A12 OS=Mus musculus GN=Pcdhga12 PE=1 SV=1	590.539	545.236	544.889	552.114	511.555	573.377	703.371	724.096	692.275	660.444	739.304	622.574	588.509	601.591	575.819	663.104	677.753	631.386	622.966	672.917	745.191	632.997	631.939	611.822
Q3UH93	Plxnd1	Plexin-D1 OS=Mus musculus GN=Plxnd1 PE=1 SV=1	645.311	609.032	683.435	635.227	686.419	688.927	552.089	559.148	574.095	591.608	547.917	572.518	845.993	762.876	670.645	618.581	711.363	703.871	563.346	523.336	575.234	523.347	541.357	604.774
Q62288	Spock1	Testican-1 OS=Mus musculus GN=Spock1 PE=2 SV=2	661.339	552.029	637.419	636.091	634.66	611.785	530.109	581.853	523.295	614.052	594.192	577.428	730.167	673.718	693.592	635.986	656.362	594.672	603.87	605.64	565.439	528.453	576.853	595.855
P08122	Col4a2	Collagen alpha-2(IV) chain OS=Mus musculus GN=Col4a2 PE=1 SV=4	558.308	398.545	555.17	606.218	552.608	581.261	774.116	964.061	640.662	730.751	646.661	748.031	661.193	450.8	738.268	864.55	779.508	537.115	794.852	757.703	743.867	551.151	801.537	1002.26
P47753	Capza1	F-actin-capping protein subunit alpha-1 OS=Mus musculus GN=Capza1 PE=1 SV=4	618.859	648.936	663.902	636.707	658.12	666.694	560.204	579.974	518.012	566.396	495.853	524.97	478.155	522.118	542.29	541.141	507.895	490.459	633.334	630.61	593.717	544.146	621.621	617.506
A6H6S0	Herc3	Hect domain and RLD 3 OS=Mus musculus GN=Herc3 PE=1 SV=1	NA	1161.9	NA	833.536	NA	524.049	2766.69	NA	NA	NA	575.147	636.46	NA	NA	541.577	NA	NA	1091.57	687.549	619.219	NA	1273.16	NA	NA
O35136	Ncam2	Neural cell adhesion molecule 2 OS=Mus musculus GN=Ncam2 PE=1 SV=1	706.872	768.303	641.137	701.984	644.092	665.519	625.948	592.125	588.243	589.203	628.685	660.169	608.783	656.523	628.787	594.736	592.109	621.741	615.281	627.286	552.283	592.284	594.464	626.176
P63011	Rab3a	Ras-related protein Rab-3A OS=Mus musculus GN=Rab3a PE=1 SV=1	656.446	672.727	651.898	647.134	621.824	642.161	541.841	589.462	534.824	571.487	548.565	576	520.528	522.693	531.81	562.863	552.933	526.894	606.656	596.436	559.943	507.473	578	631.613
O88998	Olfm1	Noelin OS=Mus musculus GN=Olfm1 PE=1 SV=1	650.737	589.047	611.474	627.152	660.138	601.382	596.314	593.043	548.388	607.254	552.027	604.859	615.053	575.8	628.366	698.247	622.544	632.003	575.62	585.899	599.346	523.487	533.44	517.719
P63325	Rps10	40S ribosomal protein S10 OS=Mus musculus GN=Rps10 PE=1 SV=1	563.545	554.431	577.086	566.688	563.865	601.276	626.212	608.141	640.591	621.52	636.126	610.152	564.341	582.217	623.3	638.224	591.656	603.963	569.088	633.406	645.604	632.29	601.209	585.117
E9PUL5	Prrt2	Proline-rich transmembrane protein 2 OS=Mus musculus GN=Prrt2 PE=1 SV=1	643.252	611.857	542.177	629.626	628.205	604.397	622.623	558.712	609.648	571.625	685.481	744.489	505.974	581.853	482.509	542.391	630.219	718.124	599.434	703.641	525.056	607.17	592.249	620.103
P05214	Tuba3a	Tubulin alpha-3 chain OS=Mus musculus GN=Tuba3a PE=1 SV=1	589.744	593.633	597.076	620.248	612.289	594.085	607.294	639.496	623.016	589.373	638.247	632.431	649.728	671.779	637.835	623.613	632.223	633.746	624.998	610.645	631.866	608.319	604.677	591.285
A0A0R4J0B8	Sh3gl3	Endophilin-A3 OS=Mus musculus GN=Sh3gl3 PE=1 SV=1	643.675	644.036	664.778	641.825	644.179	643.43	579.847	607.995	612.627	596.547	570.519	592.306	660.893	644.802	628.221	608.838	638.756	637.766	633.141	625.85	623.907	626.46	628.257	642.477
Q8BKV0	Spock3	Testican-3 OS=Mus musculus GN=Spock3 PE=2 SV=2	646.065	553.686	643.741	553.082	638.41	581.848	546.27	567.495	523.295	619.379	545.569	579.881	710.033	673.718	649.156	657.084	638.481	611.479	582.073	586.019	610.082	561.968	576.853	560.506
Q9Z0E0	Ncdn	Neurochondrin OS=Mus musculus GN=Ncdn PE=1 SV=1	676.842	703.257	668.694	656.488	652.739	640.308	603.487	602.917	540.372	573.175	525.969	636.064	629.097	580.027	588.139	591.179	624.989	571.663	643.25	571.947	575.199	574.834	614.942	661.542
Q04736	Yes1	Tyrosine-protein kinase Yes OS=Mus musculus GN=Yes1 PE=1 SV=3	662.682	663.68	676.619	662.792	676.867	627.491	615.11	612.368	596.269	587.026	598.134	596.611	605.209	629.608	600.35	597.116	618.509	565.191	597.79	614.437	608.58	579.935	635.364	633.516
Q99LG2	Tnpo2	Transportin-2 OS=Mus musculus GN=Tnpo2 PE=1 SV=1	651.472	625.545	658.876	640.735	646.646	608.047	554.339	598.466	583.402	585.021	564.884	607.247	607.993	647.351	577.845	573.34	613.383	583.834	642.079	594.886	618.615	598.044	599.409	626.691
Q69ZF3	Gba2	Non-lysosomal glucosylceramidase OS=Mus musculus GN=Gba2 PE=1 SV=2	573.796	609.496	608.223	510.201	537.689	583.909	654.078	648.78	635.038	685.785	651.284	559.613	560.332	579.329	656.09	671.823	606.682	628.184	642.03	656.463	662.158	616.666	616.831	577.231
Q8R1U1	Cog4	Conserved oligomeric Golgi complex subunit 4 OS=Mus musculus GN=Cog4 PE=1 SV=1	773.325	737.177	778.366	691.298	764.274	646.309	783.1	713.202	NA	689.478	725.874	737.98	627.77	NA	646.47	722.127	642.158	589.294	715.243	653.169	605.941	782.693	NA	698.772
A0A0R4J0G6	Qpct	Glutaminyl-peptide cyclotransferase OS=Mus musculus GN=Qpct PE=1 SV=1	NA	630.714	803.076	530.31	739.845	672.444	553.626	NA	573.72	538.416	451.178	516.425	NA	725.773	733.681	578.686	NA	579.923	521.155	535.881	616.806	605.617	650.118	NA
A0A0R4IZY0	Thop1	Thimet oligopeptidase OS=Mus musculus GN=Thop1 PE=1 SV=1	606.715	623.932	639.862	643.788	626.87	635.394	592.662	602.531	586.876	597.932	588.655	615.337	626.33	609.321	633.643	630.347	620.922	605.012	604.796	615.821	611.496	586.54	601.299	588.869
Q8CBY8-2	Dctn4	Isoform 2 of Dynactin subunit 4 OS=Mus musculus GN=Dctn4	585.921	613.101	630.171	606.223	635.361	593.673	654.483	654.744	642.078	668.572	685.235	686.093	580.72	610.204	634.966	649.588	602.057	600.387	650.67	638.432	692.398	632.75	657.083	597.062
Q8R1V4	Tmed4	Transmembrane emp24 domain-containing protein 4 OS=Mus musculus GN=Tmed4 PE=1 SV=1	607.621	607.377	606.846	584.593	541.082	580.125	669.121	628.05	653.26	650.491	591.87	680.979	592.779	618.124	602.343	576.935	593.829	573.582	609.426	593.872	646.565	650.522	607.566	660.18
Q8R1Q8	Dync1li1	Cytoplasmic dynein 1 light intermediate chain 1 OS=Mus musculus GN=Dync1li1 PE=1 SV=1	566.354	558.869	545.164	592.01	541.748	597.803	623.068	615.193	605.917	629.963	626.389	589.03	542.537	526.482	566.852	587.502	553.314	606.941	597.449	614.105	607.131	612.476	580.181	582.922
Q91VA7	Idh3b	Isocitrate dehydrogenase [NAD] subunit, mitochondrial OS=Mus musculus GN=Idh3b PE=1 SV=1	599.84	590.04	589.799	578.268	579.076	567.697	607.246	641.014	621.611	626.144	645.695	634.238	602.554	620.003	592.477	602.096	590.387	622.098	661.853	634.497	625.434	603.175	600.641	634.333
Q920E5	Fdps	Farnesyl pyrophosphate synthase OS=Mus musculus GN=Fdps PE=1 SV=1	538.469	601.021	559.768	651.433	532.472	567.499	725.573	654.73	676.638	666.064	727.331	755.462	642.3	594.804	565.768	559.742	593.9	581.615	705.244	724.028	647.531	682.837	695.08	675.266
Q61543	Glg1	Golgi apparatus protein 1 OS=Mus musculus GN=Glg1 PE=1 SV=1	617.789	582.654	592.25	639.912	577.984	590.519	610.772	618.021	629.819	631.976	638.464	662.048	584.824	603.847	611.176	617.564	586.352	571.652	645.04	600.252	632.283	644.515	646.79	622.596
Q9D172	D10Jhu81e	ES1 protein homolog, mitochondrial OS=Mus musculus GN=D10Jhu81e PE=1 SV=1	554.27	545.869	568.248	575.07	532.953	532.024	627.147	602.527	631.486	630.397	642.826	665.119	602.53	631.318	602.254	618.714	592.278	661.097	623.836	610.317	641.064	618.717	616.131	583.572
A0A0A6YWL7	Ntrk3	Tyrosine-protein kinase receptor OS=Mus musculus GN=Ntrk3 PE=1 SV=1	636.685	614.014	588.161	666.624	650.489	662.559	593.477	603.768	584.85	600.805	604.518	584.525	537.976	534.515	628.15	597.199	570.974	604.773	633	600.203	608	598.687	621.145	606.99
A0A0N4SUM4	Chl1	Neural cell adhesion molecule L1-like protein OS=Mus musculus GN=Chl1 PE=1 SV=1	650.32	662.241	605.106	622.464	604.95	649.593	584.817	593.406	656.382	600.992	655.364	578.181	734.599	703.077	697.025	658.466	722.532	692.473	604.689	576.26	546.992	642.34	555.728	545.168
Q91XY2	Pcdhga6	Protocadherin gamma A6 OS=Mus musculus GN=Pcdhga6 PE=2 SV=1	571.927	510.035	544.889	552.83	511.555	529.849	728.721	753.589	692.275	660.444	735.832	569.643	571.107	601.591	566.152	663.104	693.917	633.203	597.239	692.214	745.191	652.8	631.939	598.762
Q9QZE7	Tsnax	Translin-associated protein X OS=Mus musculus GN=Tsnax PE=1 SV=1	642.032	665.329	687.899	595.065	622.122	604.967	608.787	581.792	663.623	563.692	580.578	619.218	710.948	676.693	625.953	640.015	698.01	661.175	561.452	571.675	622.282	633.858	663.405	708.17
Q9R013	Ctsf	Cathepsin F OS=Mus musculus GN=Ctsf PE=1 SV=1	569.588	618.952	599.866	580.588	575.544	611.792	614.021	608.645	588.688	638.318	572.374	661.338	750.707	691.59	696.572	695.339	747.968	682.44	667.267	634.083	650.599	651.679	618.556	568.447
P34884	Mif	Macrophage migration inhibitory factor OS=Mus musculus GN=Mif PE=1 SV=2	688.731	687.855	637.923	666.075	697.844	705.629	628.449	628.518	652.497	612.693	645.413	736.135	668.412	719.886	702.381	582.863	669.884	631.276	688.988	651.124	603.332	607.105	671.644	684.627
Q99L20	Gstt3	Glutathione S-transferase theta-3 OS=Mus musculus GN=Gstt3 PE=1 SV=1	639.035	667.701	676.404	617.647	674.289	619.421	609.781	571.597	655.382	568.674	630.962	600.299	709.886	825.602	680.416	748.009	664.757	687.478	616.002	552.521	713.151	729.02	637.922	533.967
Q810U3	Nfasc	Neurofascin OS=Mus musculus GN=Nfasc PE=1 SV=1	616.086	640.589	653.759	636.588	660.566	655.37	596.017	589.834	607.333	582.332	613.584	634.733	682.427	700.668	645.952	645.235	641.126	664.014	639.739	634.865	605.717	635.144	639.808	612.498
P61963	Dcaf7	DDB1- and CUL4-associated factor 7 OS=Mus musculus GN=Dcaf7 PE=1 SV=1	702.489	700.89	687.897	638.604	645.435	644.22	608.927	587.373	540.778	582.688	626.751	566.485	520.139	477.715	608.657	577.53	582.761	483.335	549.254	638.651	581.09	588.449	608.683	659.477
Q8R0H9	Gga1	ADP-ribosylation factor-binding protein GGA1 OS=Mus musculus GN=Gga1 PE=1 SV=1	562.778	589.484	571.97	556.163	563.485	562.452	662.471	633.109	639.76	623.799	658.884	646.613	616.821	631.301	672.458	637.782	615.796	637.701	601.636	625.295	645.059	617.472	587.569	543.101
P48428	Tbca	Tubulin-specific chaperone A OS=Mus musculus GN=Tbca PE=1 SV=3	735.649	657.548	698.077	635.854	661.028	678.653	570.104	649.52	587.903	602.101	518.848	542.428	525.135	627.788	568.273	598.541	583.171	600.783	614.505	632.059	607.117	638.684	612.372	726.422
Q91XY6	Pcdhga2	MCG133388, isoform CRA_c OS=Mus musculus GN=Pcdhga2 PE=2 SV=1	571.927	543.177	544.889	579.986	511.555	610.136	703.217	753.589	684.877	660.444	737.123	657.718	571.107	558.259	647.778	663.104	693.917	606.992	609.071	705.89	745.191	664.532	660.371	598.762
P62071	Rras2	Ras-related protein R-Ras2 OS=Mus musculus GN=Rras2 PE=1 SV=1	567.993	674.849	598.261	693.038	574.752	532.426	595.134	591.661	514.066	581.126	593.68	451.08	469.298	404.662	452.778	520.588	511.06	476.916	504.769	556.073	499.82	517.184	638.186	672.871
Q9CPQ8	Atp5l	ATP synthase subunit g, mitochondrial OS=Mus musculus GN=Atp5l PE=1 SV=1	550.12	559.2	562.161	569.332	559.701	525.235	610.793	644.233	627.536	625.622	642.324	713.462	692.05	678.413	594.084	627.955	630.737	616.175	601.466	613.089	631.929	598.94	588.027	603.414
P28667	Marcksl1	MARCKS-related protein OS=Mus musculus GN=Marcksl1 PE=1 SV=2	913.633	687.064	1228.43	626.243	861.698	664.875	608.717	675.034	523.601	599.201	718.686	617.558	535.898	371.383	578.516	581.429	528.281	569.788	415.537	567.803	439.097	500.423	353.022	420.918
Q91XX1	Pcdhgc3	Protocadherin gamma C3 OS=Mus musculus GN=Pcdhgc3 PE=1 SV=1	571.927	510.035	544.889	544.383	511.555	522.296	728.721	753.589	692.275	660.444	765.334	571.988	571.107	601.591	530.792	663.104	693.917	633.203	597.239	694.032	745.191	652.8	631.939	598.762
Q6NS60	Fbxo41	F-box only protein 41 OS=Mus musculus GN=Fbxo41 PE=1 SV=3	648.318	724.609	650.49	710.131	678.022	661.229	621.058	629.746	569.224	589.955	600.939	641.184	604.031	594.468	634.498	597.733	612.881	563.601	686.91	621.252	573.806	568.158	592.864	613.667
Q6NXK7	Dpp10	Inactive dipeptidyl peptidase 10 OS=Mus musculus GN=Dpp10 PE=1 SV=1	678.524	666.399	674.249	698.309	660.865	693.137	570.988	564.689	513.85	525.723	523.829	518.35	579.691	553.632	603.778	628.094	615.774	533.57	571.099	552.618	550.21	502.209	555.481	607.008
E9PZD8	Cp	Ceruloplasmin OS=Mus musculus GN=Cp PE=1 SV=1	652.721	608.08	710.825	537.578	604.625	583.751	578.374	575.464	670.244	558.053	521.009	480.997	608.271	636.69	718.136	578.513	672.528	759.574	608.977	643.075	704.831	733.179	651.888	638.968
P97470	Ppp4c	Serine/threonine-protein phosphatase 4 catalytic subunit OS=Mus musculus GN=Ppp4c PE=1 SV=2	621.855	645.354	678.751	730.557	675.214	662.352	483.892	533.656	509.491	646.29	581.37	637.998	587.48	589.254	507.106	664.446	604.024	522.788	597.64	572.206	558.763	572.071	541.355	700.428
Q99L13	Hibadh	3-hydroxyisobutyrate dehydrogenase, mitochondrial OS=Mus musculus GN=Hibadh PE=1 SV=1	576.962	569.471	612.328	556.963	559.643	582.895	619.015	644.202	686.73	622.388	644.344	614.972	646.901	667.368	628.888	579.657	600.842	652.152	627.297	626.748	691.852	695.492	660.206	634.197
A0A140T8J4	Hebp1	Heme binding protein 1 OS=Mus musculus GN=Hebp1 PE=1 SV=1	388.635	537.585	531.694	688.37	544.727	651.658	549.924	688.568	581.125	727.45	534.986	630.629	611.925	718.417	686.646	777.947	718.392	759.195	551.902	538.139	694.054	563.24	669.755	690.098
A0A0R4J0V3	Lpin1	Phosphatidate phosphatase LPIN1 OS=Mus musculus GN=Lpin1 PE=1 SV=1	NA	NA	NA	480.202	NA	856.9	NA	NA	715.128	NA	487.23	425.676	NA	734.657	521.657	NA	NA	NA	NA	673.817	NA	NA	573.781	NA
A2AEG3	Gpm6b	Glycoprotein m6b, isoform CRA_a OS=Mus musculus GN=Gpm6b PE=1 SV=1	681.326	582.3	634.889	636.562	588.217	621.573	527.293	564.791	551.138	544.206	551.816	544.266	615.184	602.929	607.323	557.95	632.265	590.654	670.36	584.688	589.572	566.037	580.458	610.441
Q91XX0	Pcdhgc4	MCG133388, isoform CRA_r OS=Mus musculus GN=Pcdhgc4 PE=1 SV=1	571.927	510.035	544.889	552.605	511.555	536.406	728.721	753.589	692.275	660.444	757.991	566.544	571.107	601.591	525.162	663.104	693.917	633.203	597.239	700.068	745.191	652.8	631.939	598.762
Q80VQ0	Aldh3b1	Aldehyde dehydrogenase family 3 member B1 OS=Mus musculus GN=Aldh3b1 PE=1 SV=1	492.628	617.118	611.259	597.946	558.999	587.089	571.937	567.398	562.073	604.658	640.38	631.517	869.897	647.419	711.875	605.53	665.17	726.444	594.703	580.4	586.712	626.721	712.033	630.644
O88492-2	Plin4	Isoform 2 of Perilipin-4 OS=Mus musculus GN=Plin4	586.807	724.348	547.303	736.688	672.28	567.694	556.453	681.123	NA	575.222	607.05	664.205	626.968	NA	611.317	493.259	650.426	657.245	614.334	671.578	737.564	878.514	NA	841.353
E9PX29	Sptbn4	Spectrin beta chain OS=Mus musculus GN=Sptbn4 PE=1 SV=1	647.924	644.312	655.95	605.402	639.067	658.005	591.84	584.341	566.126	570.107	587.12	569.355	620.031	626.211	591.644	603.244	582.632	584.809	622.1	617.759	584.242	600.863	602.146	660.898
O35604	Npc1	Niemann-Pick C1 protein OS=Mus musculus GN=Npc1 PE=1 SV=2	616.892	593.066	607.193	601.54	659.431	630.395	545.926	579.278	573.325	604.445	526.431	503.875	692.548	717.541	588.606	660.143	698.133	614.19	580.909	643.526	680.613	637.855	584.485	576.976
Q9WV54	Asah1	Acid ceramidase OS=Mus musculus GN=Asah1 PE=1 SV=1	638.442	638.546	598.254	633.37	620.883	634.409	609.381	645.131	595.35	645.233	698.015	616.624	747.698	684.125	645.747	665.009	689.936	643.575	713.769	619.206	672.474	696.147	655.247	685.205
O70324	Slc16a2	Monocarboxylate transporter 8 OS=Mus musculus GN=Slc16a2 PE=1 SV=2	737.049	531.411	630.559	NA	990.351	NA	609.656	575.382	542.866	594.489	NA	NA	727.793	698.147	NA	596.547	623.887	748.769	534.563	NA	584.042	630.359	555.247	574.921
Q9CR68	Uqcrfs1	Cytochrome b-c1 complex subunit Rieske, mitochondrial OS=Mus musculus GN=Uqcrfs1 PE=1 SV=1	562.438	610.311	561.916	561.588	581.457	574.681	666.122	652.155	650.272	689.508	639.823	690.789	705.301	642.953	596.542	643.52	601.562	674.408	646.453	633.966	642.096	635.423	630.806	654.298
Q8BMI3	Gga3	ADP-ribosylation factor-binding protein GGA3 OS=Mus musculus GN=Gga3 PE=1 SV=2	601.037	637.26	631.067	591.367	597.463	586.674	666.268	644.964	617.425	617.862	656.291	609.956	649.255	633.918	679.155	628.347	643.61	638.49	612.093	644.221	642.077	613.032	597.732	592.131
P10404	MLV-related proviral Env polyprotein OS=Mus musculus	MLV-related proviral Env polyprotein OS=Mus musculus PE=1 SV=3	629.883	2646.14	NA	NA	NA	245.947	524.048	486.628	610.305	NA	NA	3934.5	453.054	537.509	1187.49	NA	394.071	403.805	371.889	NA	NA	479.976	918.218	468.305
P70232	Chl1	Neural cell adhesion molecule L1-like protein OS=Mus musculus GN=Chl1 PE=1 SV=2	645.544	664.748	602.042	624.277	627.617	622.732	559.594	576.112	634.075	594.491	668.127	640.006	754.033	654.712	638.053	639.522	720.982	668.617	582.789	584.545	564.352	630.104	566.531	558.767
A0A0A0MQA5	Tuba4a	Tubulin alpha chain (Fragment) OS=Mus musculus GN=Tuba4a PE=1 SV=1	597.843	597.481	603.132	619.134	623.052	599.263	607.041	633.634	619.489	592.369	635.246	643.238	662.363	684.744	640.681	627.175	638.177	641.801	638.483	614.46	634.574	619.368	605.538	596.33
Q91XY0	Pcdhga8	MCG133388, isoform CRA_m OS=Mus musculus GN=Pcdhga8 PE=1 SV=1	582.031	510.035	564.645	572.724	534.04	610.136	728.721	739.724	675.041	663.376	762.138	657.718	591.765	622.612	647.778	656.116	702.509	633.203	597.239	699.44	745.724	652.8	610.741	628.108
P54818	Galc	Galactocerebrosidase OS=Mus musculus GN=Galc PE=1 SV=2	NA	NA	NA	614.343	NA	597.942	NA	NA	NA	NA	616.733	636.01	NA	NA	647.327	NA	NA	NA	NA	536.259	NA	NA	NA	NA
Q99JI6	Rap1b	Ras-related protein Rap-1b OS=Mus musculus GN=Rap1b PE=1 SV=2	609.058	632.476	611.487	593.606	608.329	619.79	566.869	562.818	543.713	561.093	586.41	598.006	648.151	569.415	542.55	591.483	593.905	562.33	573.505	583.012	559.565	549.621	576.476	603.449
Q7M759	Abhd17b	Protein ABHD17B OS=Mus musculus GN=Abhd17b PE=1 SV=1	766.632	661.86	726.509	683.403	678.38	654.001	527.993	568.487	614.615	554.182	542.031	587.059	662.622	729.079	615.737	599.468	720.395	587.021	591.616	544.088	623.727	579.196	613.493	692.089
Q8VHI3	Pofut2	GDP-fucose protein O-fucosyltransferase 2 OS=Mus musculus GN=Pofut2 PE=1 SV=1	NA	NA	NA	NA	NA	695.025	NA	NA	565.302	NA	NA	374.034	NA	720.863	655.35	NA	NA	NA	NA	NA	NA	NA	542.478	NA
Q6IMP4	Panx2	Pannexin-2 OS=Mus musculus GN=Panx2 PE=1 SV=2	559.171	541.724	697.054	571.267	705.252	626.59	484.151	555.418	NA	704.966	627.865	696.935	674.579	NA	617.13	749.468	689.251	651.619	705.705	673.28	743.655	719.411	NA	703.847
Q61151	Ppp2r5e	Serine/threonine-protein phosphatase 2A 56 kDa regulatory subunit epsilon isoform OS=Mus musculus GN=Ppp2r5e PE=1 SV=3	599.316	590.799	592.592	581.153	579.779	594.679	624.707	631.641	643.283	637.451	624.894	672.262	675.719	657.356	634.293	645.445	643.236	637.351	626.05	605.168	629.019	606.137	597.105	582.058
Q9QUP5	Hapln1	Hyaluronan and proteoglycan link protein 1 OS=Mus musculus GN=Hapln1 PE=1 SV=1	654.026	604.404	633.171	716.459	710.865	670.815	589.942	622.877	591.649	536.182	607.459	593.79	569.46	580.547	678.691	660.728	600.089	578.554	684.903	707.998	643.883	670.861	736.241	624.225
Q9JIS5	Sv2a	Synaptic vesicle glycoprotein 2A OS=Mus musculus GN=Sv2a PE=1 SV=1	642.502	662.487	668.118	584.407	640.134	650.789	572.406	588.356	538.244	565.928	568.382	569.555	554.105	563.539	544.863	570.484	541.785	572.831	631.74	601.986	574.063	578.747	584.829	606.578
Q9CR27	Washc3	WASH complex subunit 3 OS=Mus musculus GN=Washc3 PE=1 SV=1	581.96	NA	495.751	647.791	609.125	550.941	NA	553.457	529.477	615.297	598.749	643.761	547.121	596.597	561.859	519.58	599.751	NA	NA	622.819	623.56	NA	530.206	475.717
Q9D8S9	Bola1	BolA-like protein 1 OS=Mus musculus GN=Bola1 PE=1 SV=1	572.523	619.328	561.445	575.719	562.94	594.181	696.579	609.727	658.045	682.55	687.164	766.897	648.889	661.711	637.228	670.833	634.112	740.665	660.966	647.598	617.618	671.799	620.76	591.331
Q9D8X1	Cutc	Copper homeostasis protein cutC homolog OS=Mus musculus GN=Cutc PE=1 SV=1	756.354	626.371	674.342	568.472	678.442	627.427	592.94	638.565	644.862	648.471	575.042	660.438	869.218	719.212	759.556	762.941	833.834	777.732	645.237	587.159	631.468	677.1	596.763	699.185
Q8VHH7	Adcy3	Adenylate cyclase type 3 OS=Mus musculus GN=Adcy3 PE=1 SV=2	639.194	629.438	549.293	651.821	563.719	NA	532.913	593.559	636.695	569.606	530.276	NA	797.815	695.399	NA	607.161	783.91	639.596	577.647	558.524	555.361	621.571	544.647	599.823
Q9D187	Fam96b	Mitotic spindle-associated MMXD complex subunit MIP18 OS=Mus musculus GN=Fam96b PE=1 SV=1	NA	488.69	NA	470.998	NA	NA	687.109	NA	715.057	NA	651.887	NA	NA	965.106	NA	NA	NA	583.336	580.851	583.536	NA	670.412	716.372	NA
O08842	Gfra2	GDNF family receptor alpha-2 OS=Mus musculus GN=Gfra2 PE=1 SV=2	561.361	542.927	602.385	660.689	598.315	629.035	520.366	542.266	615.249	645.224	667.07	630.711	652.404	751.247	649.882	718.469	614.88	660.68	607.503	607.431	611.782	592.473	554.414	528.854
Q9CR39	Wdr45b	WD repeat domain phosphoinositide-interacting protein 3 OS=Mus musculus GN=Wdr45b PE=1 SV=2	596.701	622.439	595.925	NA	584.947	596.893	694.338	684.573	678.986	660.856	NA	607.582	693.221	661.469	659.045	647.67	640.002	614.535	682.511	NA	618.738	609.895	569.853	519.145
H3BJQ8	Gpc5	Glypican-5 OS=Mus musculus GN=Gpc5 PE=1 SV=1	621.513	551.683	705.956	619.713	654.173	693.007	547.33	599.984	638.212	653.525	627.484	506.744	714.453	772.977	747.505	739.099	721.594	736.723	538.812	586.191	595.293	661.372	636.381	536.027
P60879-2	Snap25	Isoform 2 of Synaptosomal-associated protein 25 OS=Mus musculus GN=Snap25	564.608	554.522	578.794	584.926	591.774	589.189	597.535	615.963	626.614	609.07	640.951	601.564	556.025	582.549	555.426	590.71	583.481	605.283	631.93	634.349	627.537	622.537	665.266	670.087
Q8C8R3-2	Ank2	Isoform 2 of Ankyrin-2 OS=Mus musculus GN=Ank2	616.066	625.482	626.389	627.876	637.324	636.827	616.345	612.602	612.759	619.425	624.378	609.75	654.744	644.638	644.638	635.762	619.222	659.269	629.16	616.146	615.849	617.327	624.285	587.593
Q80Z24	Negr1	Neuronal growth regulator 1 OS=Mus musculus GN=Negr1 PE=1 SV=1	578.23	567.476	579.662	566.017	583.119	551.109	537.298	574.548	543.149	589.498	528.616	623.551	679.42	632.201	565.887	566.123	582.546	607.541	548.901	525.015	555.213	532.8	543.44	581.009
Q8R1G2	Cmbl	Carboxymethylenebutenolidase homolog OS=Mus musculus GN=Cmbl PE=1 SV=1	640.381	636.318	592.363	683.587	620.868	666.398	627.304	597.746	650.576	613.297	550.7	600.571	635.426	736.825	682.659	608.839	644.667	636.766	623.92	639.128	625.272	655.784	644.502	595.779
Q9WV30-2	Nfat5	Isoform 2 of Nuclear factor of activated T-cells 5 OS=Mus musculus GN=Nfat5	NA	NA	NA	849.387	NA	699.756	NA	NA	NA	NA	411.223	434.155	NA	NA	569.853	NA	NA	NA	NA	639.293	NA	NA	NA	NA
P48453	Ppp3cb	Serine/threonine-protein phosphatase 2B catalytic subunit beta isoform OS=Mus musculus GN=Ppp3cb PE=1 SV=2	670.101	667.033	693.824	698.946	695.595	693.207	617.318	617.69	589.74	609.35	616.196	662.788	663.136	661.203	613.735	605.105	630.512	621.823	685.482	640.701	603.937	605.519	607.203	641.831
Q99LY9	Ndufs5	NADH dehydrogenase [ubiquinone] iron-sulfur protein 5 OS=Mus musculus GN=Ndufs5 PE=1 SV=3	701.593	614.447	654.167	681.626	607.046	655.229	586.387	555.122	560.57	548.907	628.16	576.076	517.117	573.811	578.115	517.091	555.393	543.688	616.671	628.598	534.94	539.48	591.224	634.843
K4DI58	Cadm3	Cell adhesion molecule 3 OS=Mus musculus GN=Cadm3 PE=1 SV=1	591.82	625.154	619.255	608.768	612.688	558.142	661.088	599.327	700.39	623.383	656.589	710.325	685.196	750.505	706.435	706.093	691.716	758.006	636.28	614.009	637.864	660.07	638.303	541.809
Q9CQD4	Chmp1b2	Charged multivesicular body protein 1b-2 OS=Mus musculus GN=Chmp1b2 PE=2 SV=2	579.3	613.32	NA	659.401	NA	740.488	593.73	672.84	533.611	NA	326.974	221.045	617.183	527.398	527.231	NA	631.873	479.904	559.563	593.11	NA	693.754	516.54	498.803
Q8C8N2	Scai	Protein SCAI OS=Mus musculus GN=Scai PE=1 SV=2	630.267	596.595	625.145	630.772	602.379	617.777	582.941	569.227	550.902	609.515	566.032	605.881	652.924	580.53	555.131	604.701	606.135	597.445	643.044	621.178	589.45	561.767	582.645	652.206
P27601	Gna13	Guanine nucleotide-binding protein subunit alpha-13 OS=Mus musculus GN=Gna13 PE=1 SV=1	618.912	604.874	642.698	643.757	634.728	616.073	595.33	628.253	620.672	572.766	637.304	615.725	691.723	638.501	641.168	638.362	655.621	638.026	598.842	599.964	628.561	637.874	623.803	589.935
P31324	Prkar2b	cAMP-dependent protein kinase type II-beta regulatory subunit OS=Mus musculus GN=Prkar2b PE=1 SV=3	637.974	621.618	617.565	594.608	625.902	606.09	577.916	585.312	571.325	607.312	608.812	660.973	612.229	583.085	566.703	550.378	589.65	591.521	620.919	588.146	576.402	574.969	607.756	618.549
Q01339	Apoh	Beta-2-glycoprotein 1 OS=Mus musculus GN=Apoh PE=1 SV=1	487.143	523.393	519.618	432.68	558.047	525.597	622.767	607.246	743.598	530.258	479.895	569.361	781.148	900.274	690.998	837.066	781.22	974.468	504.635	622.787	725.867	812.6	557.922	502.654
Q6XE40	Mpp3	MAGUK p55 subfamily member 3 OS=Mus musculus GN=Mpp3 PE=1 SV=1	609.496	603.458	594.123	602.167	613.6	617.205	639.991	602.893	607.26	642.907	608.176	630.054	608.53	578.9	634.466	683.096	630.021	670.542	659.913	620.162	592.846	616.379	585.536	570.236
Q6ZWR6	Syne1	Nesprin-1 OS=Mus musculus GN=Syne1 PE=1 SV=2	629.255	626.365	626.676	619.785	617.662	634.514	606.234	606.262	609.407	622.448	614.916	598.016	622.695	604.962	603.243	635.704	616.322	613.235	589.007	623.837	605.576	605.835	610.833	640.368
P60670	Nploc4	Nuclear protein localization protein 4 homolog OS=Mus musculus GN=Nploc4 PE=1 SV=3	638.944	640.685	630.521	591.079	616.941	606.213	573.614	598.117	563.101	623.008	614.248	618.221	564.694	521.656	580.876	639.681	584.141	596.675	604.937	605.814	613.169	599.685	607.523	598.002
P06728	Apoa4	Apolipoprotein A-IV OS=Mus musculus GN=Apoa4 PE=1 SV=3	631.308	649.714	666.685	607.374	648.124	575.193	779.373	722.111	686.978	532.973	560.439	551.406	624.361	670.045	717.396	618.562	572.726	740.574	577.962	696.723	589.053	741.111	580.48	666.928
Q9DCW5	Cox6a1	Cytochrome c oxidase subunit 6A, mitochondrial OS=Mus musculus GN=Cox6a1 PE=1 SV=1	579.387	557.48	583.539	529.016	557.57	521.819	642.109	598.913	646.128	687.184	669.059	798.323	700.802	646.709	569.427	663.924	656.318	608.152	567.891	585.246	614.133	579.786	579.434	594.857
A0A0A6YWT1	Fnbp1	Formin-binding protein 1 (Fragment) OS=Mus musculus GN=Fnbp1 PE=1 SV=1	635.272	634.058	664.81	496.89	625.664	554.32	692.84	624.257	566.756	599.757	627.793	525.54	433.821	497.73	527.902	544.993	513.376	457.722	601.751	612.991	681.605	552.386	655.309	547.589
P10649	Gstm1	Glutathione S-transferase Mu 1 OS=Mus musculus GN=Gstm1 PE=1 SV=2	637.221	623.506	666.959	604.628	636.121	608.143	560.485	569.098	556.894	569.672	535.015	595.808	614.191	636.171	572.08	583.842	617.41	617.911	634.121	603.172	594.425	632.419	617.419	626.595
B1ARU1	Macf1	Microtubule-actin cross-linking factor 1 OS=Mus musculus GN=Macf1 PE=1 SV=1	539.39	602.396	525.283	606.321	606.564	550.096	633.19	620.018	629.597	646.105	643.707	602.903	599.719	630.939	620.998	633.675	610.033	648.953	602.961	622.965	636.242	636.868	621.87	620.504
G5E8G5	Prom1	Prominin 1, isoform CRA_a OS=Mus musculus GN=Prom1 PE=1 SV=1	645.645	690.529	NA	598.136	NA	585.093	665.335	791.037	663.501	NA	639.034	548.392	566.61	505.021	441.529	NA	559.169	526.621	505.983	446.73	NA	539.948	508.375	796.541
Q9CRD4	Dbndd2	Dysbindin domain-containing protein 2 OS=Mus musculus GN=Dbndd2 PE=1 SV=1	NA	699.542	1030.49	NA	630.352	NA	554.614	NA	299.75	658.252	NA	NA	NA	108.448	NA	259.46	NA	227.715	366.52	NA	543.97	323.888	595.508	NA
Q9EQ20	Aldh6a1	Methylmalonate-semialdehyde dehydrogenase [acylating], mitochondrial OS=Mus musculus GN=Aldh6a1 PE=1 SV=1	564.394	577.445	616.057	565.042	591.376	573.9	604.041	581.472	631.298	620.708	618.41	623.828	627.185	685.313	644.413	624.957	653.85	672.775	576.807	611.222	640.922	634.244	631.848	641.736
Q9CPP6	Ndufa5	NADH dehydrogenase [ubiquinone] 1 alpha subcomplex subunit 5 OS=Mus musculus GN=Ndufa5 PE=1 SV=3	592.792	580.914	582.096	572.935	561.187	554.53	634.71	632.185	641.573	632.681	654.661	617.626	634.841	607.107	582.58	621.972	587.614	643.639	618.285	611.669	645.363	608.345	575.509	566.657
P08113	Hsp90b1	Endoplasmin OS=Mus musculus GN=Hsp90b1 PE=1 SV=2	631.936	641.36	610.856	650.939	646.584	617.199	634.843	659.488	644.383	621.965	647.605	681.436	579.115	612.13	580.936	562.707	584.969	547.496	648.905	622.969	640.542	626.928	640.718	639.968
P60879	Snap25	Synaptosomal-associated protein 25 OS=Mus musculus GN=Snap25 PE=1 SV=1	559.403	555.17	595.461	569.553	592.51	612.202	610.275	615.736	612.801	589.129	641.726	590.371	563.84	575.742	558.596	568.84	578.877	593.506	641.024	646.893	623.851	624.483	665.043	649.345
P12970	Rpl7a	60S ribosomal protein L7a OS=Mus musculus GN=Rpl7a PE=1 SV=2	561.056	529.079	563.604	595.627	575.973	596.715	624.212	607.975	614.751	641.127	609.679	663.321	595.41	587.401	614.171	637.829	560.71	587.301	591.942	600.203	622.618	597.211	563.434	535.051
Q6PFB2	Rcc1	Rcc1 protein OS=Mus musculus GN=Rcc1 PE=1 SV=1	617.369	561.105	539.038	615.005	556.695	559.761	594.146	591.717	606.488	582.984	588.622	668.492	709.576	729.299	640.39	640.911	679.639	646.654	636.368	653.187	605.803	659.762	602.013	577.841
P70698	Ctps1	CTP synthase 1 OS=Mus musculus GN=Ctps1 PE=1 SV=2	615.842	636.598	614.065	638.952	578.214	609.965	595.659	635.617	648.684	665.904	705.029	709.917	583.96	591.071	649.703	605.643	599.491	583.511	641.402	653.365	640.834	617.801	634.01	598.026
P17183	Eno2	Gamma-enolase OS=Mus musculus GN=Eno2 PE=1 SV=2	569.983	613.671	578.917	633.761	604.84	644.786	630.851	623.926	641.136	612.811	592.86	643.784	687.944	674.848	644.335	617.584	618.424	612.14	686.599	677.59	620.988	652.758	647.52	656.977
Q80TB8	Vat1l	Synaptic vesicle membrane protein VAT-1 homolog-like OS=Mus musculus GN=Vat1l PE=1 SV=2	661.359	701.274	687.753	577.988	636.998	638.115	524.507	597.044	522.723	548.841	558.605	576.736	573.095	537.379	633.403	530.895	589.572	598.559	548.773	598.01	627.641	631.602	585.802	549.533
Q0KL02-4	Trio	Isoform 4 of Triple functional domain protein OS=Mus musculus GN=Trio	621.5	629.631	603.848	639.268	607.267	636.73	619.202	618.273	624.7	639.677	636.181	654.621	617.944	609.819	604.839	611.058	598.99	602.868	652.142	609.719	625.672	589.226	619.067	607.5
P27600	Gna12	Guanine nucleotide-binding protein subunit alpha-12 OS=Mus musculus GN=Gna12 PE=1 SV=3	616.064	609.534	658.092	674.45	639.485	611.456	578.872	630.481	578.379	550.003	635.912	625.902	696.99	653.821	627.565	615.511	653.245	626.458	617.522	600.878	621.268	604.241	597.267	586.968
P52483	Ube2e3	Ubiquitin-conjugating enzyme E2 E3 OS=Mus musculus GN=Ube2e3 PE=1 SV=2	NA	590.854	NA	641.297	NA	NA	571.146	NA	NA	NA	691.981	NA	NA	NA	NA	NA	NA	644.017	548.145	537.958	NA	562.975	NA	NA
S4R2F3	Ank2	Ankyrin-2 OS=Mus musculus GN=Ank2 PE=1 SV=3	616.131	625.476	627.245	629.093	637.633	641.252	615.823	612.199	612.197	619.288	623.517	604.914	653.007	644.558	643.636	635.418	618.076	658.373	629.148	617.064	616.047	616.352	624.636	587.591
Q7TQ95	Lnp	Protein lunapark OS=Mus musculus GN=Lnp PE=1 SV=1	591.075	581.174	562.032	605.451	602.308	607.647	632.994	643.743	703.935	684.463	641.593	636.217	661.805	643.646	646.701	645.508	612.063	673.525	639.301	635.361	618.485	653.674	594.885	534.234
P70206	Plxna1	Plexin-A1 OS=Mus musculus GN=Plxna1 PE=1 SV=1	593.266	611.508	630.492	641.109	660.431	628.237	625.725	613.038	593.643	622.685	610.074	624.197	687.647	646.441	623.863	652.235	637.992	676.651	611.362	598.983	622.758	612.638	595.553	575.17
O55229	Chkb	Choline/ethanolamine kinase OS=Mus musculus GN=Chkb PE=1 SV=3	586.727	574.566	565.755	542.426	546.111	582.592	592.678	622.81	651.196	608.976	619.804	640.243	663.546	674.685	652.551	660.35	680.884	611.729	586.616	606.227	608.903	610.729	566.071	509.462
Q3V117	Acly	ATP-citrate synthase OS=Mus musculus GN=Acly PE=1 SV=1	595.519	638.781	603.638	602.14	600.819	585.274	616.338	623.489	614.132	616.233	600.403	661.211	627.857	610.651	572.608	552.711	596.247	569.097	696.167	666.218	659.936	636.782	653.2	674.49
Q62048	Pea15	Astrocytic phosphoprotein PEA-15 OS=Mus musculus GN=Pea15 PE=1 SV=1	809.85	815.558	813.013	761.949	765.333	716.394	613.804	554.618	578.763	575.222	503.822	557.567	553.622	554.325	560.315	529.255	587.051	568.841	685.305	578.589	504.966	582.847	599.527	634.391
Q99LX0	Park7	Protein DJ-1 OS=Mus musculus GN=Park7 PE=1 SV=1	587.789	561.093	619.616	625.7	599.626	598.813	611.812	609.437	586.686	602.939	621.989	603.37	652.135	642.683	602.996	615.356	641.628	672.162	629.967	653.299	629.857	600.359	580.795	617.802
Q8BK30	Ndufv3	NADH dehydrogenase [ubiquinone] flavoprotein 3, mitochondrial OS=Mus musculus GN=Ndufv3 PE=1 SV=1	541.459	397.336	947.445	769.609	858.862	664.059	434.765	538.248	541.187	564.658	623.577	410.553	338.955	438.8	285.699	889.427	475.703	793.891	530.18	676.06	559.834	468.62	530.374	442.645
Q99L04	Dhrs1	Dehydrogenase/reductase SDR family member 1 OS=Mus musculus GN=Dhrs1 PE=1 SV=1	585.644	567.496	569.906	608.619	529.247	577.913	601.333	588.401	595.368	602.056	615.49	570.265	563.628	559.517	570.424	589.865	548.735	578.692	609.716	658.057	655.185	624.726	618.029	585.313
Q9JJ28	Flii	Protein flightless-1 homolog OS=Mus musculus GN=Flii PE=1 SV=1	565.745	560.701	532.186	610.282	538.634	562.979	647.604	605.831	628.961	672.245	661.072	588.846	649.579	627.101	626.315	636.176	615.509	652.588	667.701	647.874	638.265	639.602	579.738	606.564
A0A0R4J275	Ndufa12	NADH dehydrogenase [ubiquinone] 1 alpha subcomplex subunit 12 OS=Mus musculus GN=Ndufa12 PE=1 SV=1	608.762	573.882	558.754	575.983	551.957	569.798	639.411	619.246	640.244	625.015	672.116	650.81	584.988	608.262	632.51	621.435	593.062	647.944	649.083	632.681	615.771	625.279	586.92	567.577
Q8K596	Slc8a2	Sodium/calcium exchanger 2 OS=Mus musculus GN=Slc8a2 PE=1 SV=1	622.024	609.115	638.61	683.777	651.433	666.501	586.705	591.202	547.499	597.603	570.683	559.279	605.916	561.834	617.125	680.192	619.705	614.482	574.385	577.331	588.333	543.035	596.333	648.718
Q8VBZ3	Clptm1	Cleft lip and palate transmembrane protein 1 homolog OS=Mus musculus GN=Clptm1 PE=1 SV=1	576.495	561.267	595.968	592.355	602.824	556.724	614.961	619.148	679.053	611.476	630.347	614.31	646.525	646.971	673.302	672.339	645.206	635.184	584.982	641.002	642.466	620.407	611.706	569.958
Q9CY97	Ssu72	RNA polymerase II subunit A C-terminal domain phosphatase SSU72 OS=Mus musculus GN=Ssu72 PE=1 SV=1	591.183	561.896	563.871	563.948	582.449	503.725	700.975	623.273	665.68	567.246	665.473	606.679	677.581	627.585	569.207	688.704	658.28	650.713	512.376	577.561	573.527	618.978	525.755	492.666
Q3UEB4	Mvk	Mevalonate kinase OS=Mus musculus GN=Mvk PE=1 SV=1	556.723	661.347	539.49	536.88	489.975	525.745	609.452	653.771	697.341	626.963	636.417	667.577	654.191	694.432	633.963	631.43	628.469	611.025	665.603	658.059	665.61	689.069	607.978	650.79
A0A0G2JEA5	Gm43738	Uncharacterized protein OS=Mus musculus GN=Gm43738 PE=4 SV=1	534.044	588.61	560.443	689.313	531.096	551.199	754.2	658.799	694.064	667.339	822.736	797.249	641.506	619.384	587.561	558.868	597.458	595.299	734.565	741.361	650.075	696.112	690.883	670.038
Q9Z1T6	Pikfyve	1-phosphatidylinositol 3-phosphate 5-kinase OS=Mus musculus GN=Pikfyve PE=1 SV=3	571.87	572.674	630.682	628.506	639.507	622.526	602.478	609.642	618.133	659.693	682.493	686.994	645.808	621.955	653.398	647.083	641.458	491.416	566.529	636.803	639.957	550.861	575.925	619.267
A0A087WR56	Nfasc	Neurofascin (Fragment) OS=Mus musculus GN=Nfasc PE=1 SV=1	611.473	636.367	653.939	634.552	661.072	657.66	598.93	584.587	605.019	579.614	610.176	617.413	667.358	682.964	648.055	649.07	629.675	650.787	637.894	640.065	606.559	640.291	650.303	601.262
Q9WV98	Timm9	Mitochondrial import inner membrane translocase subunit Tim9 OS=Mus musculus GN=Timm9 PE=1 SV=1	610.02	589.978	627.306	557.518	556.072	582.639	604.7	597.137	590.387	631.182	573.005	644.576	525.424	643.17	493.748	583.977	558.928	626.411	667.483	584.916	613.956	598.225	584.225	599.59
P85094	Isoc2a	Isochorismatase domain-containing protein 2A OS=Mus musculus GN=Isoc2a PE=1 SV=1	539.254	529.861	533.007	507.27	484.869	585.682	515.22	548.281	663.881	549.895	537.914	643.245	679.743	788.355	721.896	586.161	617.665	662.505	617.346	630.175	611.469	659.673	580.115	484.913
Q9DCD6	Gabarap	Gamma-aminobutyric acid receptor-associated protein OS=Mus musculus GN=Gabarap PE=1 SV=2	572.878	516.442	568.627	567.141	544.609	552.852	638.321	653.789	670.379	651.163	701.977	601.078	602.786	621.773	657.395	698.374	581.694	687.814	594.786	638.728	640.772	605.137	619.03	501.576
P11499	Hsp90ab1	Heat shock protein HSP 90-beta OS=Mus musculus GN=Hsp90ab1 PE=1 SV=3	601.345	611.42	607.081	635.776	622.923	619.46	611.69	616.731	592.113	633.715	640.571	634.479	532.745	575.364	572.847	555.264	540.548	559.508	647.206	634.623	599.203	615.679	634.248	590.649
Q9D8C2	Tspan13	Tetraspanin-13 OS=Mus musculus GN=Tspan13 PE=1 SV=1	549.548	588.883	646.483	621.909	596.032	736.228	589.148	359.801	343.72	383.896	389.766	190.643	160.388	273.204	365.47	363.132	252.838	430.951	401.152	601.269	559.748	444.233	490.62	327.15
P25444	Rps2	40S ribosomal protein S2 OS=Mus musculus GN=Rps2 PE=1 SV=3	608.825	614.53	624.707	612.589	609.125	587.238	615.269	603.981	604.01	606.743	580.36	657.074	522.71	586.772	573.466	612.634	554.75	575.808	622.797	609.749	611.459	600.583	634.783	588.403
Q5DTT2-2	Psd	Isoform 2 of PH and SEC7 domain-containing protein 1 OS=Mus musculus GN=Psd	618.752	615.754	649.278	656.821	665.906	660.367	693.023	599.137	632.006	682.503	621.771	581.87	571.605	561.761	654.304	729.876	612.211	691.994	588.316	556.555	571.854	579.273	554.475	555.585
Q8BTS0	Ddx5	DEAD (Asp-Glu-Ala-Asp) box polypeptide 5 OS=Mus musculus GN=Ddx5 PE=1 SV=1	642.211	639.799	647.338	584.394	611.689	607.821	579.115	613.091	594.051	592.157	581.727	599.033	628.838	611.47	593.348	600.253	645.863	611.364	605.75	579.225	603.907	600.123	576.499	622.616
P25911	Lyn	Tyrosine-protein kinase Lyn OS=Mus musculus GN=Lyn PE=1 SV=4	689.3	695.085	701.374	707.746	722.952	655.771	602.756	618.581	586.336	555.752	557.181	587.54	615.921	652.466	576.811	564.51	633.792	498.98	604.645	603.06	630.175	527.724	653.496	671.938
Q9R1P3	Psmb2	Proteasome subunit beta type-2 OS=Mus musculus GN=Psmb2 PE=1 SV=1	557.009	601.15	559.973	632.204	553.029	574.306	647.305	630.083	619.195	615.334	623.011	513.651	571.88	629.261	621.376	591.332	566.033	611.552	567.596	638.354	604.575	600.977	583.908	593.304
A0A1D5RLF1	Reep1	Receptor expression-enhancing protein OS=Mus musculus GN=Reep1 PE=1 SV=1	611.889	600.134	566.528	668.78	604.508	576.328	686.633	620.148	640.03	663.453	704.433	594.548	416.085	491.866	569.834	618.643	510.766	550.492	536.688	418.52	582.016	576.959	637.364	562.475
Q61282	Acan	Aggrecan core protein OS=Mus musculus GN=Acan PE=1 SV=2	646.048	591.862	591.393	639.547	587.448	685.113	617.698	590.136	628.279	566.33	693.394	666.907	638.966	665.348	655.864	658.979	621.716	576.399	681.525	752.654	691.868	714.99	698.086	681.267
P14211	Calr	Calreticulin OS=Mus musculus GN=Calr PE=1 SV=1	630.323	620.569	619.836	617.444	643.8	612.733	582.394	601.691	555.669	596.001	593.847	562.225	504.308	465.06	524.754	545.917	526.152	552.274	607.787	586.338	583.449	582.363	598.247	600.665
Q80YX1	Tnc	Tenascin OS=Mus musculus GN=Tnc PE=1 SV=1	633.593	582.669	635.08	647.804	632.763	640.138	760.906	741.518	680.019	640.891	705.613	510.284	582.541	587.756	590.921	614.636	574.061	630.605	542.83	676.225	558.087	634.631	659.597	561.481
O35375	Nrp2	Neuropilin-2 OS=Mus musculus GN=Nrp2 PE=1 SV=2	560.407	631.662	702.413	632.146	633.148	677.026	634.603	617.141	671.412	638.642	583.278	480.694	314.093	561.45	545.599	555.134	500.864	603.734	608.599	675.665	616.778	628.495	661.649	720.569
P07309	Ttr	Transthyretin OS=Mus musculus GN=Ttr PE=1 SV=1	510.514	570.598	673.261	540.636	611.2	552.318	587.949	608.375	662.974	507.358	529.944	484.723	619.953	658.287	662.842	646.082	612.127	619.841	529.544	701.45	594.509	648.919	612.021	547.086
Q9R0X4	Acot9	Acyl-coenzyme A thioesterase 9, mitochondrial OS=Mus musculus GN=Acot9 PE=1 SV=1	603.377	657.991	620.278	586.011	596.411	607.198	637.743	636.909	626.563	614.66	686.801	619.604	573.839	560.659	599.518	601.915	600.986	591.063	656.745	635.615	627.801	598.786	656.307	668.269
E9PX68	Slc4a1ap	Solute carrier family 4 (anion exchanger), member 1, adaptor protein OS=Mus musculus GN=Slc4a1ap PE=1 SV=1	682.168	579.424	598.802	564.143	537.368	584.478	566.049	610.966	655.783	578.761	668.166	696.095	723.008	772.846	710.373	542.87	674.206	567.787	584.703	602.51	563.038	615.741	659.742	650.702
A2BFF9	Dync1i2	Cytoplasmic dynein 1 intermediate chain 2 OS=Mus musculus GN=Dync1i2 PE=1 SV=1	661.873	579.632	550.797	662.034	586.733	642.007	655.419	664.439	697.799	650.79	674.584	631.815	592.677	711.557	594.983	642.288	609.606	715.562	614.128	632.688	631.097	698.164	650.646	674.257
Q6ZWQ7	Spcs3	Signal peptidase complex subunit 3 OS=Mus musculus GN=Spcs3 PE=1 SV=1	639.156	625.816	NA	741.895	NA	NA	650.692	632.225	560.603	NA	517.762	NA	456.908	395.664	NA	NA	466.846	435.235	580.373	712.519	NA	516.993	724.755	474.939
Q91WD5	Ndufs2	NADH dehydrogenase [ubiquinone] iron-sulfur protein 2, mitochondrial OS=Mus musculus GN=Ndufs2 PE=1 SV=1	618.895	621.063	586.784	570.833	571.312	552.469	644.251	630.035	633.249	625.015	668.809	655.432	614.541	630.259	597.635	613.817	608.819	604.995	640.495	616.251	621.15	609.403	608.369	595.647
Q9CQX8	Mrps36	28S ribosomal protein S36, mitochondrial OS=Mus musculus GN=Mrps36 PE=1 SV=1	558.124	624.585	592.899	580.197	602.394	607.384	737.822	683.723	757.003	714.074	727.385	695.197	624.589	751.899	703.24	692.162	622.628	724.255	665.061	637.946	678.336	666.379	670.6	514.052
Q8CFE4	Scyl2	SCY1-like protein 2 OS=Mus musculus GN=Scyl2 PE=1 SV=1	563.056	585.67	558.876	544.354	579.74	587.748	670.54	639.893	637.461	679.989	647.586	690.05	635.068	645.199	664.025	681.168	614.899	664.579	628.746	620.073	632.843	629.559	597.882	547.431
Q924B0	Impa1	Inositol (Myo)-1(Or 4)-monophosphatase 1 OS=Mus musculus GN=Impa1 PE=1 SV=1	602.946	568.811	597.238	584.553	594.613	564.983	628	607.661	626.428	587.601	627.759	588.126	589.827	633.793	587.405	607.409	605.214	634.78	584.208	615.642	612.842	610.221	645.174	634.315
Q8K400	Stxbp5	Syntaxin-binding protein 5 OS=Mus musculus GN=Stxbp5 PE=1 SV=3	633.17	608.313	610.375	672.89	625.069	648.357	613.301	604.794	603.045	662.485	665.856	674.343	625.669	583.723	648.073	651.301	598.836	603.318	583.214	610.559	654.717	608.236	603.586	619.511
E9Q4Z6	Dzank1	Double zinc ribbon and ankyrin repeat-containing protein 1 OS=Mus musculus GN=Dzank1 PE=1 SV=1	575.922	605.584	598.586	614.434	590.222	608.126	638.329	612.755	677.109	624.527	663.158	642.514	678.732	671.299	675.898	661.859	609.936	648.906	597.968	616.919	623.374	643.742	618.394	542.694
P40124	Cap1	Adenylyl cyclase-associated protein 1 OS=Mus musculus GN=Cap1 PE=1 SV=4	617.817	664.655	612.812	678.171	629.667	644.706	600.192	598.571	582.563	596.737	585.056	546.897	533.124	556.695	569.806	610.888	554.025	517.901	591.528	598.069	592.208	534.453	642.255	631.965
Q61699	Hsph1	Heat shock protein 105 kDa OS=Mus musculus GN=Hsph1 PE=1 SV=2	625.079	590.013	610.096	614.399	589.052	614.656	592.134	613.032	605.74	651.453	619.524	602.772	553.996	578.151	549.415	544.4	553.084	603.824	668.973	616.487	625.423	631.126	602.537	591.835
Q8R4F1	Ntng2	Netrin-G2 OS=Mus musculus GN=Ntng2 PE=1 SV=2	654.63	586.849	582.738	515.91	564.625	600.081	597.66	598.697	616.302	615.564	543.618	570.759	428.569	462.487	581.523	594.551	459.456	568.483	643.612	591.134	583.154	616.725	673.192	620.456
Q91VN4	Chchd6	MICOS complex subunit Mic25 OS=Mus musculus GN=Chchd6 PE=1 SV=2	562.169	599.687	591.703	596.36	563.96	611.678	688.223	643.098	703.406	696.121	684.838	652.11	619.672	672.945	688.511	718.135	603.496	740.465	636.872	645.172	673.837	672.353	667.559	522.59
Q9JJZ2	Tuba8	Tubulin alpha-8 chain OS=Mus musculus GN=Tuba8 PE=1 SV=1	584.418	588.62	591.203	618.934	599.303	592.727	605.706	652.13	616.407	589.092	640.28	613.301	640.566	641.273	649.609	635.741	633.59	616.519	614.614	602.162	640.744	592.907	599.878	583.879
Q80WJ7	Mtdh	Protein LYRIC OS=Mus musculus GN=Mtdh PE=1 SV=1	549.097	597.832	564.527	598.933	563.256	610.444	650.953	614.088	657.088	597.734	566.509	623.455	602.104	633.686	594.27	629.128	559.645	645.641	610.53	687.327	643.325	669.523	595.126	606.772
Q80ZJ7	Snx32	Sorting nexin-32 OS=Mus musculus GN=Snx32 PE=2 SV=1	643.192	740.748	653.485	752.225	605.299	551.383	660.194	525.846	674.62	583.558	527.611	642.953	707.674	780.76	624.158	668.832	761.23	662.135	629.596	629.412	606.889	657.031	648.769	753.991
Q9CQZ1	Hsbp1	Heat shock factor-binding protein 1 OS=Mus musculus GN=Hsbp1 PE=1 SV=1	521.659	392.056	856.866	844.073	1096.19	675.792	403.146	496.813	576.58	506.468	490.143	687.757	573.695	523.888	247.159	604.64	785.29	676.906	566.115	518.122	485.232	508.025	516.431	651.852
Q5SXR6	Cltc	Clathrin heavy chain OS=Mus musculus GN=Cltc PE=1 SV=1	638.363	676.466	633.245	642.199	617.088	616.985	621.61	622.328	556.273	590.79	598.982	621.735	557.716	574.309	572.998	576.192	580.713	567.916	637.306	630.011	581.611	562.476	613.179	651.379
P00158	Mt-Cyb	Cytochrome b OS=Mus musculus GN=Mt-Cyb PE=1 SV=1	640.132	737.241	NA	666.869	NA	833.025	611.584	537.3	459.247	NA	439.414	209.583	367.809	310.922	544.911	NA	423.54	398.664	743.481	647.792	NA	565.484	629.208	632.083
Q8BTI8	Srrm2	Serine/arginine repetitive matrix protein 2 OS=Mus musculus GN=Srrm2 PE=1 SV=3	567.317	576.35	568.651	593.739	568.334	617.062	695.381	639.693	637.348	660.578	728.09	605.502	628.173	642.599	673.635	665.498	603.546	660.558	563.043	657.686	614.524	626.516	576.073	533.269
Q00493	Cpe	Carboxypeptidase E OS=Mus musculus GN=Cpe PE=1 SV=2	622.972	646.218	677.732	631.74	651.394	669.582	541.826	557.297	543.742	581.078	578.695	642.737	632.619	612.077	593.589	645.252	588.584	616.319	598.288	597.72	572.725	600.456	571.36	537.731
P97411	Ica1	Islet cell autoantigen 1 OS=Mus musculus GN=Ica1 PE=1 SV=3	723.451	659.886	622.218	721.068	640.84	617.252	605.867	632.728	577.767	631.588	604.108	651.392	504.31	521.723	632.366	596.48	593.201	555.925	652.759	613.935	651.964	565.003	584.324	626.291
Q8VED9	Lgalsl	Galectin-related protein OS=Mus musculus GN=Lgalsl PE=1 SV=1	634.452	639.531	619.234	633.295	632.145	614.875	625.442	656.474	597.351	615.774	594.508	580.058	650.688	614.248	619.977	604.162	675.085	605.554	663.235	631.011	638.881	617.591	625.285	634.892
Q5DTT2-3	Psd	Isoform 3 of PH and SEC7 domain-containing protein 1 OS=Mus musculus GN=Psd	635.329	633.731	639.632	643.689	661.254	649.726	693.772	601.449	631.293	695.548	632.826	601.319	592.234	558.681	664.418	735.546	609.951	705.765	584.664	540.816	569.538	586.863	560.579	556.264
Q8BP92	Rcn2	Reticulocalbin-2 OS=Mus musculus GN=Rcn2 PE=1 SV=1	709.116	629.728	721.346	642.843	646.614	665.37	582.863	585.085	600.27	572.941	519.55	535.303	533.632	593.512	539.908	551.105	573.643	611.758	567.409	639.049	553.945	649.969	600.869	641.303
O08997	Atox1	Copper transport protein ATOX1 OS=Mus musculus GN=Atox1 PE=1 SV=1	614.09	620.405	626.991	599.218	600.751	653.161	595.633	595.001	599.301	554.482	586.08	560.921	556.241	570.956	548.118	515.576	533.644	593.93	598.094	611.074	604.512	602.079	626.053	729.084
Q8C3X4	Guf1	Translation factor Guf1, mitochondrial OS=Mus musculus GN=Guf1 PE=1 SV=1	NA	711.638	591.934	660.792	645.108	575.517	821.3	NA	662.6	574.548	658.896	652.268	NA	796.511	662.518	740.2	NA	680.049	643.146	580.72	566.272	561.365	678.466	NA
P63330	Ppp2ca	Serine/threonine-protein phosphatase 2A catalytic subunit alpha isoform OS=Mus musculus GN=Ppp2ca PE=1 SV=1	667.128	646.548	628.81	651.481	638.699	617.017	561.607	606.357	585.939	587.424	540.679	601.971	602.657	585.796	573.179	578.012	626.658	561.128	626.376	577.986	604.506	573.146	616.21	704.478
Q8K021	Scamp1	Secretory carrier-associated membrane protein 1 OS=Mus musculus GN=Scamp1 PE=1 SV=1	565.306	537.105	561.464	586.606	547.843	592.032	634.096	589.313	665.929	626.33	656.754	673.86	621.127	654.373	658.737	647.059	609.479	683.346	595.367	630.971	600.056	643.634	631.845	554.375
O08532-5	Cacna2d1	Isoform 2E of Voltage-dependent calcium channel subunit alpha-2/delta-1 OS=Mus musculus GN=Cacna2d1	640.843	601.399	632.514	598.316	617.428	632.737	556.667	586.273	594.189	588.372	561.763	547.859	652.487	569.653	625.132	633.578	653.039	633.443	587.323	590.65	597.81	598.664	574.9	610.37
Q9ERZ3	Chrm3	Muscarinic acetylcholine receptor M3 OS=Mus musculus GN=Chrm3 PE=1 SV=1	567.062	673.745	611.053	572.138	620.375	605.549	716.761	579.469	647.99	603.245	548.832	572.595	691.074	753.275	653.317	698.698	781.137	683.287	593.12	540.704	601.065	644.288	524.205	563.489
P13707	Gpd1	Glycerol-3-phosphate dehydrogenase [NAD(+)], cytoplasmic OS=Mus musculus GN=Gpd1 PE=1 SV=3	586.739	556.539	602.768	625.37	613.252	615.329	599.559	610.274	601.597	606.931	592.348	639.773	593.557	600.94	593.708	647.388	606.287	606.189	625.22	589.02	623.918	574.408	592.999	594.954
P98084	Apba2	Amyloid beta A4 precursor protein-binding family A member 2 OS=Mus musculus GN=Apba2 PE=1 SV=2	605.799	546.057	559.786	569.197	567.441	541.365	608.742	667.124	518.042	623.6	671.542	639.43	579.409	403.322	557.354	587.782	591.767	559.005	688.821	641.147	646.294	624.082	595.798	634.168
Q9WTX5	Skp1	S-phase kinase-associated protein 1 OS=Mus musculus GN=Skp1 PE=1 SV=3	703.406	628.501	630.601	653.579	606.781	665.829	563.533	577.521	540.993	548.062	514.168	524.233	490.835	481.628	523.44	535.131	575.223	469.459	529.206	606.625	539.72	547.596	590.948	646.438
A0A075B6A0	Ighm	Ig mu chain C region (Fragment) OS=Mus musculus GN=Ighm PE=1 SV=2	638.497	901.389	279.049	270.488	204.4	602.148	540.036	456.505	394.498	500.211	717.219	363.651	1058.67	983.367	1347.38	815.425	1149.59	1050.56	487.931	1258.07	1594.95	919.494	972.511	513.799
E9QAQ5	Gsk3b	Glycogen synthase kinase-3 beta OS=Mus musculus GN=Gsk3b PE=1 SV=1	596.584	570.827	582.058	570.058	560.526	563.498	603.059	606.68	628.327	616.027	633.787	668.139	627.95	617.54	615.802	602.486	608.422	624.028	607.369	605.61	613.084	582.478	613.472	561.204
A0A0R4J2C2	Syt2	Synaptotagmin II OS=Mus musculus GN=Syt2 PE=1 SV=1	585.646	594.4	616.39	599.015	602.869	591.336	624.392	624.047	612.939	607.782	629.888	635.79	668.289	635.04	614.394	642.133	603.108	600.897	664.384	631.827	634.758	613.835	611.883	556.07
Q9Z275	Rlbp1	Retinaldehyde-binding protein 1 OS=Mus musculus GN=Rlbp1 PE=1 SV=3	581.922	580.716	628.195	525.111	628.025	688.072	593.207	556.601	563.428	611.478	523.284	454.896	829.438	663.79	703.481	673.734	673.934	638.526	557.741	590.274	549.185	559.02	607.12	592.822
Q9R1E6-3	Enpp2	Isoform 3 of Ectonucleotide pyrophosphatase/phosphodiesterase family member 2 OS=Mus musculus GN=Enpp2	659.602	608.767	639.393	643.821	734.053	724.222	601.069	582.234	593.343	690.807	769.817	708.727	648.85	702.445	729.391	651.691	661.851	623.186	654.696	740.616	669.075	656.536	658.734	620.418
P70333	Hnrnph2	Heterogeneous nuclear ribonucleoprotein H2 OS=Mus musculus GN=Hnrnph2 PE=1 SV=1	696.634	687.792	707.129	639.304	655.978	629.831	586.477	564.884	572.847	568.811	565.901	551.609	578.79	607.249	547.344	540.233	553.771	585.283	655.886	668.999	562.116	596.476	632.675	683.135
F6Q750	Macf1	Microtubule-actin cross-linking factor 1 (Fragment) OS=Mus musculus GN=Macf1 PE=1 SV=1	541.005	608.116	528.349	608.387	607.997	552.624	636.314	619.523	624.865	647.384	642.884	589.503	588.827	620.718	617.132	635.993	607.201	642.552	602.606	622.004	635.578	633.804	623.352	620.829
Q5SV85-2	Synrg	Isoform 2 of Synergin gamma OS=Mus musculus GN=Synrg	589.684	600.208	566.599	593.881	571.685	599.443	655.79	631.342	663.558	659.739	672.658	645.811	619.976	619.633	617.41	604.083	601.277	642.493	620.46	676.937	622.217	629.978	637.592	601.572
Q8CGK3	Lonp1	Lon protease homolog, mitochondrial OS=Mus musculus GN=Lonp1 PE=1 SV=2	614.022	611.157	598.409	591.381	578.125	593.485	610.797	612.632	618.129	599.589	601.948	549.6	538.768	586.641	567.743	571.352	567.92	582.114	628.878	599.868	602	578.258	605.606	624.774
P40630	Tfam	Transcription factor A, mitochondrial OS=Mus musculus GN=Tfam PE=1 SV=2	559.793	564.359	573.346	557.028	555.788	549.7	640.87	614.479	634.008	643.087	703.546	621.502	558.898	592.485	621.711	620.183	554.253	646.658	636.281	599.172	643.288	613.563	598.524	513.351
A0A0R4J0Z1	Pdia4	Protein disulfide-isomerase A4 OS=Mus musculus GN=Pdia4 PE=1 SV=1	587.903	576.031	595.614	632.101	600.039	588.164	613.561	660.311	685.978	677.721	654.69	658.708	604.852	592.482	576.172	616.054	582.526	619.676	654.409	629.111	652.082	673.271	647.841	593.455
Q810U4-5	Nrcam	Isoform 5 of Neuronal cell adhesion molecule OS=Mus musculus GN=Nrcam	590.883	552.421	589.207	620.003	596.93	596.869	622.412	625.719	638.168	638.637	675.91	559.43	613	611.535	643.897	657.488	636.321	683.941	596.731	568.526	621.941	583.182	644.941	662.626
P07901	Hsp90aa1	Heat shock protein HSP 90-alpha OS=Mus musculus GN=Hsp90aa1 PE=1 SV=4	597.263	582.956	606.844	604.011	618.177	604.01	598.704	606.144	605.849	632.417	661.55	618.307	538.345	591.941	542.217	533.041	527.474	594.64	665.628	628.106	608.69	637.8	644.465	575.434
Q14BI2	Grm2	Metabotropic glutamate receptor 2 OS=Mus musculus GN=Grm2 PE=1 SV=2	694.075	667.321	649.765	653.085	668.331	661.834	555.087	565.006	567.715	571.205	576.631	551.934	599.898	683.849	586.211	659.899	628.989	639.983	562.825	587.591	572.725	548.738	582.275	600.353
P10833	Rras	Ras-related protein R-Ras OS=Mus musculus GN=Rras PE=1 SV=1	565.388	703.388	629.953	627.473	637.105	578.958	596.682	579.669	558.063	566.867	658.578	590.302	536.962	467.988	569.223	565.684	567.477	542.461	537.676	537.103	528.311	543.674	644.226	676.15
P70404	Idh3g	Isocitrate dehydrogenase [NAD] subunit gamma 1, mitochondrial OS=Mus musculus GN=Idh3g PE=1 SV=1	610.897	634.613	608.763	602.935	589.564	632.014	619.786	595.247	613.373	605.014	605.222	639.461	586.607	640.154	576.074	579.739	580.309	615.272	631.077	614.974	580.227	617.474	615.611	644.028
Q5SSM3	Arhgap44	Rho GTPase-activating protein 44 OS=Mus musculus GN=Arhgap44 PE=1 SV=1	642.776	629.773	635.761	643.824	622.293	654.605	592.77	605.735	573.148	602.584	630.093	559.207	553.073	558.315	557.863	586.206	566.08	598.012	620.027	618.369	599.587	620.521	632.46	673.681
P97822	Anp32e	Acidic leucine-rich nuclear phosphoprotein 32 family member E OS=Mus musculus GN=Anp32e PE=1 SV=2	525.044	535.742	589.18	562.666	573.584	580.961	590.996	553.614	657.476	580.356	578.486	605.461	726.488	755.97	684.404	607.081	631.759	668.035	572.369	602.031	555.424	618.839	602.453	573.045
Q9JJY3	Smpd3	Sphingomyelin phosphodiesterase 3 OS=Mus musculus GN=Smpd3 PE=1 SV=1	625.699	620.865	555.055	562.901	582.298	597.211	631.574	606.933	580.692	606.384	612.995	668.131	579.643	606.454	584.505	617.108	614.41	622.8	621.471	550.673	593.499	579.164	577.836	594.719
Q5DU41	Lrrc8b	Volume-regulated anion channel subunit LRRC8B OS=Mus musculus GN=Lrrc8b PE=1 SV=3	618.722	569.612	604.37	624.879	674.61	610.446	616.452	637.95	612.464	659.134	619.783	652.093	709.163	702.094	673.165	794.502	596.702	576.806	569.858	560.323	589.03	624.961	586.444	588.019
Q9CZW5	Tomm70	Mitochondrial import receptor subunit TOM70 OS=Mus musculus GN=Tomm70 PE=1 SV=2	588.854	572.525	584.676	552.684	585.85	617.921	575.752	605.242	594.12	602.369	588.903	581.575	538.607	531.471	569.417	584.453	554.44	579.769	633.532	625.206	614.359	598.315	631.62	606.949
Q8VCC9	Spon1	Spondin-1 OS=Mus musculus GN=Spon1 PE=1 SV=1	665.366	730.258	727.029	894.082	702.943	732.319	594.766	548.843	615.427	632.441	792.367	701.979	702.528	957.452	741.011	711.418	745.391	650.363	572.78	649.093	613.006	572.23	645.992	617.42
Q9Z0M3	Cdh20	Cadherin-20 OS=Mus musculus GN=Cdh20 PE=2 SV=1	NA	NA	NA	554.261	NA	552.481	NA	NA	NA	NA	624.299	581.839	NA	NA	536.087	NA	NA	NA	NA	761.603	NA	NA	NA	NA
E9PWX1	Dpp6	Dipeptidyl aminopeptidase-like protein 6 OS=Mus musculus GN=Dpp6 PE=1 SV=1	718.872	767.924	637.418	700.214	681.458	673.129	585.282	604.455	541.535	577.15	576.29	561.445	611.688	575.637	599.306	601.685	623.437	545.307	604.721	580.153	573.054	537.465	594.641	672.901
Q9R069	Bcam	Basal cell adhesion molecule OS=Mus musculus GN=Bcam PE=1 SV=1	533.869	599.081	663.422	605.506	721.798	632.701	579.265	531.482	740.872	633.383	623.524	775.38	753.925	876.222	750.489	705.477	625.004	691.232	578.448	689.81	680.703	698.1	706.776	557.449
P05132	Prkaca	cAMP-dependent protein kinase catalytic subunit alpha OS=Mus musculus GN=Prkaca PE=1 SV=3	637.667	654.972	636.015	708.957	675.93	638.548	658.131	634.867	540.278	586.894	673.517	662.665	562.183	541.606	625.751	585.073	591.427	570.359	597.261	643.05	587.335	575.52	597.286	559.393
Q9CYR0	Ssbp1	Single-stranded DNA-binding protein, mitochondrial OS=Mus musculus GN=Ssbp1 PE=1 SV=1	615.677	691.042	598.345	641.795	616.233	707.792	635.568	581.821	NA	564.335	506.232	429.93	369.011	NA	534.417	589.409	509.778	525.282	671.411	611.13	638.623	586.77	NA	632.766
Q9D0L8	Rnmt	mRNA cap guanine-N7 methyltransferase OS=Mus musculus GN=Rnmt PE=1 SV=1	665.139	644.941	677.423	656.447	630.139	598.212	521.557	579.108	593.349	580.37	574.206	567.665	617.652	619.128	576.822	568.399	621.574	560.567	583.804	595.168	592.019	591.579	576.326	672.804
Q9DC51	Gnai3	Guanine nucleotide-binding protein G(k) subunit alpha OS=Mus musculus GN=Gnai3 PE=1 SV=3	642.517	666.734	653.738	669.927	655.829	649.009	618.141	624.005	593.982	572.259	599.458	649.469	647.985	688.195	648.973	619.604	648.239	617.149	638.736	621.208	607.188	597.494	657.386	600.552
B2RWC4	Lrrc73	Gm88 protein OS=Mus musculus GN=Lrrc73 PE=1 SV=1	585.478	577.828	591.228	638.028	676.409	596.907	661.93	614.407	602.985	607.628	623.256	613.243	695.642	624.655	662.312	678.926	650.545	649.674	668.972	571.107	617.026	571.861	554.994	513.955
O08529	Capn2	Calpain-2 catalytic subunit OS=Mus musculus GN=Capn2 PE=1 SV=4	634.837	619.96	598.697	612.215	590.302	602.105	567.39	571.491	619.452	625.604	621.247	647.154	597.682	637.608	560.727	640.379	649.391	632.403	629.345	623.917	639.835	596.602	638.476	626.95
Q8BGF0	AW551984	Expressed sequence AW551984 OS=Mus musculus GN=AW551984 PE=1 SV=1	600.644	565.754	598.808	598.753	621.365	644.853	561.816	595.258	656.695	600.93	675.516	588.51	671.736	690.494	666.345	562.505	682.787	662.581	489.546	695.289	676.472	655.539	570.558	645.954
P68373	Tuba1c	Tubulin alpha-1C chain OS=Mus musculus GN=Tuba1c PE=1 SV=1	599.551	603.864	607.266	619.737	615.175	600.674	602.05	633.054	615.701	587.277	629.741	635.59	649.842	675.198	634.933	615.867	629.935	630.147	631.741	607.941	626.733	611.178	603.173	603.243
Q61133	Gstt2	Glutathione S-transferase theta-2 OS=Mus musculus GN=Gstt2 PE=1 SV=4	639.608	644.902	676.404	612.806	674.289	648.064	564.967	531.512	623.497	568.674	525.633	626.394	695.721	790.023	690.809	748.009	635.95	607.277	572.167	516.413	713.151	629.568	620.707	554.611
E0CXB9	Ctnna2	Catenin alpha-2 OS=Mus musculus GN=Ctnna2 PE=1 SV=1	643.974	632.172	635.504	593.362	635.083	632.025	623.491	610.311	621.01	623.495	599.728	597.876	604.394	580.313	575.349	606.444	619.3	628.126	610.177	594.415	613.169	621.736	605.484	628.457
Q9D892	Itpa	Inosine triphosphate pyrophosphatase OS=Mus musculus GN=Itpa PE=1 SV=2	651.1	667.049	631.968	641.634	635.99	625.343	579.452	602.032	576.917	576.916	566.921	551.115	559.744	604.471	594.865	620.6	603.863	574.466	587.111	586.387	578.399	547.695	601.754	624.144
P39688	Fyn	Tyrosine-protein kinase Fyn OS=Mus musculus GN=Fyn PE=1 SV=4	635.876	653.407	645.772	631.683	643.281	601.221	612.694	599.278	589.861	606.234	605.567	654.315	647.409	613.978	594.799	616.294	636.546	610.49	633.603	616.182	602.389	594.082	605.685	619.238
P47941	Crkl	Crk-like protein OS=Mus musculus GN=Crkl PE=1 SV=2	616.571	604.785	579.625	563.951	613.468	595.335	616.864	621.529	668.91	598.108	582.256	580.679	662.246	671.863	614.464	577.823	636.093	640.548	600.999	621.423	680.37	668.441	628.465	655.641
P11531	Dmd	Dystrophin OS=Mus musculus GN=Dmd PE=1 SV=3	646.69	653.003	670.435	635.41	719.77	627.179	610.972	639.43	647.219	616.64	626.306	585.675	707.828	683.115	660.76	637.173	692.431	672.964	647.62	645.498	656.284	650.3	640.764	661.65
Q9D6Y7	Msra	Mitochondrial peptide methionine sulfoxide reductase OS=Mus musculus GN=Msra PE=1 SV=1	587.6	538.565	560.374	511.828	572.339	508.233	645.414	673.026	730.238	664.446	667.996	600.71	687.94	760.205	606.423	686.689	654.988	733.184	609.398	667.414	655.032	667.262	577.869	544.099
Q62376	Snrnp70	U1 small nuclear ribonucleoprotein 70 kDa OS=Mus musculus GN=Snrnp70 PE=1 SV=2	540.821	565.141	586.528	614.083	632.578	646.242	684.403	665.626	671.857	619.126	625.197	605.969	643.01	609.492	629.831	664.813	595.746	619.459	588.867	586.747	627.416	538.835	521.633	525.039
P20934	Evi2a	Protein EVI2A OS=Mus musculus GN=Evi2a PE=1 SV=2	801.416	NA	615.026	632.711	868.611	639.153	NA	416.501	488.837	500.925	548.826	537.198	514.73	469.369	463.846	540.341	755.555	NA	NA	800.131	813.643	NA	656.198	735.225
P63276	Rps17	40S ribosomal protein S17 OS=Mus musculus GN=Rps17 PE=1 SV=2	588.079	577.331	582.839	603.357	545.228	584.642	593.988	623.428	636.024	639.027	666.781	720.513	662.569	649.888	684.673	641.355	628.422	631.214	611.443	620.091	636.079	606.109	588.482	571.111
P48771	Cox7a2	Cytochrome c oxidase subunit 7A2, mitochondrial OS=Mus musculus GN=Cox7a2 PE=1 SV=2	550.053	533.942	547.362	564.355	563.21	558.341	630.496	591.913	623.693	655.799	694.128	731.817	694.334	729.052	660.395	670.696	590.833	645.959	626.773	582.538	605.001	627.994	561.826	495.236
Q6PEB6	Mob4	MOB-like protein phocein OS=Mus musculus GN=Mob4 PE=1 SV=1	681.492	653.931	635.932	626.039	640.833	623.804	563.234	605.464	554.571	622.522	604.437	589.701	483.983	589.555	585.879	622.936	549.841	570.719	602.562	556.326	595.831	533.735	618.277	689.76
P32037	Slc2a3	Solute carrier family 2, facilitated glucose transporter member 3 OS=Mus musculus GN=Slc2a3 PE=1 SV=1	550.256	559.633	588.538	572.199	612.852	577.59	654.543	621.086	687.785	701.393	701.889	754.623	737.257	731.128	687.042	735.423	654.519	761.349	654.234	610.336	635.994	644.655	581.228	556.687
P21460	Cst3	Cystatin-C OS=Mus musculus GN=Cst3 PE=1 SV=2	632.778	627.475	711.077	744.907	671.252	617.233	575.683	525.083	545.41	553.173	527.827	677.239	639.662	666.19	626.257	649.721	659.899	673.53	648.146	633.156	555.541	634.78	641.332	626.029
Q9D2R0	Aacs	Acetoacetyl-CoA synthetase OS=Mus musculus GN=Aacs PE=1 SV=1	559.248	587.157	607.152	759.315	728.457	616.207	568.158	588.46	606.937	613.387	673.29	671.085	743.89	733.064	677.938	611.664	651.566	635.958	637.914	600.058	612.072	732.907	555.657	633.439
Q9DCS9	Ndufb10	NADH dehydrogenase [ubiquinone] 1 beta subcomplex subunit 10 OS=Mus musculus GN=Ndufb10 PE=1 SV=3	664.684	605.702	645.862	598.326	588.382	619.037	580.242	588.818	569.559	562.548	569.671	591.009	592.119	580.299	568.827	526.204	571.877	552.812	636.022	619.481	587.912	589.5	618.847	672.67
Q6IFT4	Arhgap20	Rho GTPase-activating protein 20 OS=Mus musculus GN=Arhgap20 PE=1 SV=1	NA	NA	NA	554.046	NA	621.598	NA	NA	707.94	NA	618.053	650.48	NA	707.848	677.252	NA	NA	NA	NA	505.592	NA	NA	643.701	NA
Q8BGN3	Enpp6	Ectonucleotide pyrophosphatase/phosphodiesterase family member 6 OS=Mus musculus GN=Enpp6 PE=1 SV=1	735.408	712.789	709.472	705.411	701.5	653.666	637.466	542.241	629.413	541.689	628.184	521.842	583.291	656.731	572.592	589.665	681.279	622.337	647.949	618.469	585.449	554.006	564.998	573.244
Q8BH24	Tm9sf4	Transmembrane 9 superfamily member 4 OS=Mus musculus GN=Tm9sf4 PE=1 SV=1	584.743	598.203	566.758	574.601	566.995	578.179	646.881	610.227	653.335	647.775	650.486	680.654	632.992	648.145	531.257	563.447	599.085	611.22	693.129	624.13	649.134	729.357	607.596	696.968
Q8R3R8	Gabarapl1	Gamma-aminobutyric acid receptor-associated protein-like 1 OS=Mus musculus GN=Gabarapl1 PE=1 SV=2	559.586	537.291	578.931	527.644	553.023	557.838	637.942	654.643	700.42	648.819	682.958	649.364	597.506	664.387	722.886	708.64	570.86	699.046	599.874	626.361	655.193	608.104	646.338	481.82
Q60597-3	Ogdh	Isoform 3 of 2-oxoglutarate dehydrogenase, mitochondrial OS=Mus musculus GN=Ogdh	628.087	652.531	608.211	596.387	584.202	576.989	622.418	597.311	632.377	614.851	599.07	643.276	587.94	619.788	572.748	583.869	587.054	609.475	642.446	610.751	625.561	630.679	626.403	650.82
P70290	Mpp1	55 kDa erythrocyte membrane protein OS=Mus musculus GN=Mpp1 PE=1 SV=1	599.534	608.682	596.94	597.121	609.383	571.6	596.971	604.306	687.963	595.073	677.334	666.043	677.433	671.135	646.712	645.528	648.464	597.792	600.146	686.156	645.846	641.551	628.937	590.693
Q8CCJ3	Ufl1	E3 UFM1-protein ligase 1 OS=Mus musculus GN=Ufl1 PE=1 SV=2	551.14	515.231	547.868	662.311	622.562	595.284	511.537	580.778	600.595	568.855	554.834	617.632	657.262	586.656	602.062	554.116	568.267	500.01	507.569	564.921	541.424	558.63	641.122	618.977
Q02819	Nucb1	Nucleobindin-1 OS=Mus musculus GN=Nucb1 PE=1 SV=2	650.943	593.308	692.11	630.107	699.427	637.356	607.666	546.796	644.427	612.968	592.994	554.574	623.85	519.688	470.983	546.05	630.467	653.31	636.757	660.099	621.992	664.958	630.791	674.047
E9Q4M4	Chchd6	MICOS complex subunit OS=Mus musculus GN=Chchd6 PE=1 SV=1	562.169	599.687	591.703	590.759	563.96	613.415	688.223	643.098	692.062	696.121	698.851	648.893	619.672	662.791	688.038	718.135	603.496	740.465	636.872	634.724	673.837	672.353	663.456	522.59
Q9CXW3	Cacybp	Calcyclin-binding protein OS=Mus musculus GN=Cacybp PE=1 SV=1	600.123	604.543	576.344	604.863	595.662	601.888	563.781	617.794	590.793	633.903	600.784	611.97	516.322	510.915	523.508	556.403	525.115	515.739	593.326	603.479	596.439	573.806	626.035	619.614
Q9D1J3	Sarnp	SAP domain-containing ribonucleoprotein OS=Mus musculus GN=Sarnp PE=1 SV=3	571.429	573.169	593.928	588.776	598.92	602.75	606.238	652.106	652.281	662.546	647.201	641.909	680.286	642.086	688.199	651.528	632.022	679.644	628.32	601.363	632.006	637.576	595.704	535.543
K4DI62	Sp4	Transcription factor Sp4 OS=Mus musculus GN=Sp4 PE=1 SV=1	NA	NA	620.538	NA	602.281	713.2	NA	NA	NA	669.168	NA	786.196	NA	NA	776.646	671.524	NA	NA	NA	NA	570.691	NA	NA	NA
Q3UMF9	Faxc	Failed axon connections homolog OS=Mus musculus GN=Faxc PE=2 SV=1	NA	NA	NA	596.563	NA	587.772	NA	NA	NA	NA	700.05	662.755	NA	NA	710.45	NA	NA	NA	NA	622.333	NA	NA	NA	NA
Q9WUT3	Rps6ka2	Ribosomal protein S6 kinase alpha-2 OS=Mus musculus GN=Rps6ka2 PE=1 SV=1	615.975	583.437	618.38	630.572	635.286	649.949	610.402	637.362	622.698	622.817	584.168	597.151	657.035	613.053	660.99	622.476	649.389	620.356	554.727	628.483	615.284	612.314	604.651	617.117
Q3TMH2	Scrn3	Secernin-3 OS=Mus musculus GN=Scrn3 PE=1 SV=1	600.57	618.135	580.426	607.677	555.094	583.335	645.137	617.716	603.657	606.907	687.194	631.158	669.208	633.508	623.463	619.08	640.071	647.613	645.602	599.742	592.84	657.348	640.672	623.949
Q3U2G2	Hspa4	Heat shock 70 kDa protein 4 OS=Mus musculus GN=Hspa4 PE=1 SV=1	608.155	585.676	605.353	590.187	586.262	611.476	594.795	608.296	586.736	630.974	602.487	585.86	559.955	582.257	564.951	574.862	567.833	602.771	633.897	611.637	606.841	605.855	589.418	601.404
Q8CC88	Vwa8	von Willebrand factor A domain-containing protein 8 OS=Mus musculus GN=Vwa8 PE=1 SV=2	598.645	549.345	617.016	561.981	586.143	580.74	616.652	634.86	668.916	638.523	659.68	615.19	650.028	666.752	644.026	629.397	650.471	678.627	608.522	622.364	646.655	643.033	603.644	587.12
Q91X84	Crtc3	CREB-regulated transcription coactivator 3 OS=Mus musculus GN=Crtc3 PE=1 SV=2	NA	NA	NA	NA	NA	555.589	NA	NA	608.81	NA	NA	265.08	NA	698.082	658.565	NA	NA	NA	NA	NA	NA	NA	659.009	NA
Q9CZW6	Rnf146	E3 ubiquitin-protein ligase RNF146 OS=Mus musculus GN=Rnf146 PE=1 SV=2	NA	NA	NA	654.431	NA	620.219	NA	NA	NA	NA	724.919	698.272	NA	NA	664.145	NA	NA	NA	NA	630.555	NA	NA	NA	NA
Q04519	Smpd1	Sphingomyelin phosphodiesterase OS=Mus musculus GN=Smpd1 PE=1 SV=2	579.507	589.003	589.715	681.507	592.307	577.593	544.988	591.202	657.7	718.752	707.165	704.727	620.536	661.706	660.833	743.887	623.624	600.782	678.698	704.807	716.721	619.902	574.58	571.584
Q61584	Fxr1	Fragile X mental retardation syndrome-related protein 1 OS=Mus musculus GN=Fxr1 PE=1 SV=2	629.744	649.273	635.928	635.106	612.346	593.088	600.962	640.48	607.005	623.855	597.583	569.724	522.57	571.505	586.593	572.604	569.67	527.564	577.479	618.469	630.659	591.617	628.554	649.691
P05202	Got2	Aspartate aminotransferase, mitochondrial OS=Mus musculus GN=Got2 PE=1 SV=1	590.333	562.134	590.529	570.055	574.967	589.568	597.354	609.41	615.708	617.376	635.717	630.046	598.019	654.468	618.009	572.394	588.35	632.3	668.029	639.488	632.563	629.259	614.567	639.087
A2ATU0	Dhtkd1	Probable 2-oxoglutarate dehydrogenase E1 component DHKTD1, mitochondrial OS=Mus musculus GN=Dhtkd1 PE=1 SV=1	649.976	709.211	644.902	668.386	628.746	NA	771.992	579.35	NA	496.188	634.071	NA	781.098	NA	NA	634.218	774.104	697.05	536.515	573.163	582.279	737.842	NA	774.533
Q7TQG7	Adam11	A disintegrin and metallopeptidase domain 11, isoform CRA_a OS=Mus musculus GN=Adam11 PE=1 SV=1	612.706	571.122	575.565	588.047	597.165	617.31	592.243	626.598	600.241	624.909	635.896	562.477	571.487	562.165	626.47	640.535	580.531	621.374	641.705	632.404	638.67	648.011	631.432	631.32
Q9WVC2-2	Lynx1	Isoform 2 of Ly-6/neurotoxin-like protein 1 OS=Mus musculus GN=Lynx1	614.244	532.263	572.193	584.538	549.658	532.301	530.962	529.951	622.473	587.667	624.893	647.605	682.345	750.251	617.335	693.995	635.773	662.139	623.744	617.342	625.18	629.341	610.224	571.388
P50172	Hsd11b1	Corticosteroid 11-beta-dehydrogenase isozyme 1 OS=Mus musculus GN=Hsd11b1 PE=1 SV=3	877.106	696.481	692.781	464.08	703.707	703.191	524.409	578.938	613.616	587.761	577.409	556.344	923.752	740.996	746.819	699.02	783.523	623.706	596.469	540.057	624.629	590.762	469.624	748.916
P62823	Rab3c	Ras-related protein Rab-3C OS=Mus musculus GN=Rab3c PE=1 SV=1	656.589	650.877	611.88	665.836	606.169	638.791	573.845	618.746	553.395	559.25	575.545	561.614	518.462	491.497	551.502	555.309	569.489	538.543	585.505	608.924	554.168	547.588	624.438	637.391
H7BX08	Camsap2	Calmodulin-regulated spectrin-associated protein 2 OS=Mus musculus GN=Camsap2 PE=1 SV=1	609.977	594.681	582.699	586.971	600.006	596.78	603.07	610.429	641.24	663.08	656.882	676.348	667.519	668.749	660.279	642.124	657.611	662.14	589.946	579.48	608.93	608.439	607.023	580.985
Q6TEK5	Vkorc1l1	Vitamin K epoxide reductase complex subunit 1-like protein 1 OS=Mus musculus GN=Vkorc1l1 PE=1 SV=1	671.69	555.495	614.818	665.83	660.762	655.879	541.816	639.516	615.697	643.592	697.248	651.239	663.893	704.495	637.903	630.79	617.53	598.119	660.962	627.443	691.277	609.357	593.93	575.169
Q9CQ85	Timm22	Mitochondrial import inner membrane translocase subunit Tim22 OS=Mus musculus GN=Timm22 PE=1 SV=1	530.115	536.977	583.068	578.604	574.431	535.209	633.319	637.674	731.799	692.529	634.466	685.075	698.647	727.483	661.021	646.847	630.736	723.955	644.727	674.564	660.04	651.002	584.141	541.181
P51863	Atp6v0d1	V-type proton ATPase subunit d 1 OS=Mus musculus GN=Atp6v0d1 PE=1 SV=2	642.796	641.881	634.414	589.515	632.152	616.948	622.808	650.626	599.835	611.31	591.628	608.139	574.582	574.89	586.36	623.988	599.948	578.042	625.891	608.506	620.45	565.538	619.601	580.561
P98086	C1qa	Complement C1q subcomponent subunit A OS=Mus musculus GN=C1qa PE=1 SV=2	563.442	533.815	679.753	740.68	646.84	813.999	470.963	502.961	430.142	616.466	643.107	321.587	617.834	603.154	662.224	719.879	700.735	751.995	774.78	556.365	666.911	495.421	604.597	868.193
Q9EST5-2	Anp32b	Isoform 2 of Acidic leucine-rich nuclear phosphoprotein 32 family member B OS=Mus musculus GN=Anp32b	664.531	721.019	713.313	678.72	710.474	679.275	709.402	599.914	561.823	591.069	633.846	539.623	514.023	518.523	625.363	597.114	577.314	591.825	649.361	682.332	649.25	623.018	660.112	577.273
Q6ZWZ6	Rps12	40S ribosomal protein S12 OS=Mus musculus GN=Rps12 PE=1 SV=1	675.848	627.089	648.486	615.036	577.086	607.061	570.7	597.416	643.427	593.134	602.741	586.091	595.573	653.241	610.731	574.148	611.691	607.305	622.15	606.805	630.941	611.462	607.792	662.792
F6WR04	Ctss	Cathepsin S OS=Mus musculus GN=Ctss PE=1 SV=1	562.412	735.911	621.501	748.377	804.712	589.397	613.324	620.118	592.593	499.603	531.333	636.856	705.408	674.385	593.261	696.657	708.538	677.355	800.597	535.009	628.562	802.735	777.627	830.904
Q8C050	Rps6ka5	Ribosomal protein S6 kinase alpha-5 OS=Mus musculus GN=Rps6ka5 PE=1 SV=2	610.082	621.191	633.496	577.606	626.462	621.369	554.619	593.133	608.152	604.497	588.911	590.275	658.274	683.102	589.583	666.264	633.044	643.377	574.297	587.178	619.83	619.61	579.431	666.478
Q8R1B5	Cplx3	Complexin-3 OS=Mus musculus GN=Cplx3 PE=1 SV=1	600.294	513.713	626.073	635.967	653.627	789.574	596.26	626.946	484.173	615.912	584.356	288.137	253.507	301.267	452.471	523.564	382.172	432.938	634.822	766.954	594.576	494.981	655.155	569.961
P35803-8	Gpm6b	Isoform 8 of Neuronal membrane glycoprotein M6-b OS=Mus musculus GN=Gpm6b	707.678	562.397	664.541	629.301	616.661	667.569	527.163	557.02	511.487	522.972	513.184	477.341	502.084	531.171	584.332	522.983	550.952	536.197	630.492	580.103	559.883	522.156	593.156	635.452
Q791V5	Mtch2	Mitochondrial carrier homolog 2 OS=Mus musculus GN=Mtch2 PE=1 SV=1	600.486	607.765	581.681	623.496	574.392	593.553	640.437	641.759	620.359	637.233	678.286	691.278	613.952	644.631	622.313	624.275	618.367	641.746	668.69	628.781	630.464	618.722	634.74	608.064
Q5XG69	Fam169a	Soluble lamin-associated protein of 75 kDa OS=Mus musculus GN=Fam169a PE=1 SV=3	626.102	565.357	575.541	555.39	555.653	580.709	569.243	626.681	619.474	611.108	653.655	631.831	634.441	652.266	615.671	607.184	609.832	658.688	560.11	550.038	559.252	599.144	632.149	582.584
Q9CQW2	Arl8b	ADP-ribosylation factor-like protein 8B OS=Mus musculus GN=Arl8b PE=1 SV=1	668.654	649.155	612.963	620.281	625.323	589.621	577.494	603.762	588.701	615.89	522.527	643.447	539.158	547.054	530.039	582	553.481	476.638	592.626	562.238	581.482	512.122	619.007	642.99
Q8BKC5	Ipo5	Importin-5 OS=Mus musculus GN=Ipo5 PE=1 SV=3	637.051	628.714	619.948	689.127	625.667	616.631	604.192	649.294	586.639	658.206	683.914	577.896	566.162	586.103	571.313	591.919	605.528	591.876	646.755	653.681	617.607	609.088	613.71	616.121
Q71RI9	Kyat3	Kynurenine--oxoglutarate transaminase 3 OS=Mus musculus GN=Kyat3 PE=1 SV=1	590.4	510.12	628.516	631.391	633.634	560.896	598.425	636.385	590.215	628.56	622.827	610.533	639.033	669.638	641.224	664.766	677.834	644.94	642.093	584.712	653.669	626.607	607.102	590.877
Q8R3I2	Mboat2	Lysophospholipid acyltransferase 2 OS=Mus musculus GN=Mboat2 PE=1 SV=1	566.483	442.428	532.008	511.475	456.222	NA	612.684	605.623	697.292	693.093	739.864	NA	694.511	758.016	NA	800.848	655.164	777.711	515.15	564.571	673.411	655.209	558.909	586.308
B2RQF5	Mdga2	MAM domain-containing glycosylphosphatidylinositol anchor protein 2 OS=Mus musculus GN=Mdga2 PE=1 SV=1	669.147	636.146	624.084	570.794	604.133	603.121	598.67	570.957	587.844	603.593	586.449	632.086	566.809	594.833	610.332	632.812	643.589	642.734	637.883	564.147	598.646	647.565	630.152	688.197
A2AH85	Eftud2	116 kDa U5 small nuclear ribonucleoprotein component OS=Mus musculus GN=Eftud2 PE=1 SV=1	613.358	622.894	617.063	610.934	630.999	610.226	660.719	657.771	641.897	662.687	665.48	656.678	664.204	643.196	649.01	697.735	655.071	677.965	628.125	609.806	653.36	650.609	620.508	579.854
D3Z316	1700021F05Rik	Protein 1700021F05Rik OS=Mus musculus GN=1700021F05Rik PE=1 SV=2	527.543	498.276	569.507	506.681	557.175	505.515	587.594	631.769	641.869	627.474	628.17	678.419	662.19	647.734	561.657	740.295	619.668	621.237	609.547	573.92	648.702	631.565	598.139	537.383
Q6PAK3	Prmt8	Protein arginine N-methyltransferase 8 OS=Mus musculus GN=Prmt8 PE=1 SV=2	613.637	624.158	618.577	713.084	646.715	573.287	596.892	616.961	547.277	639.391	683.16	627.926	613.064	490.798	527.17	614.612	600.919	522.486	603.509	626.12	588.694	590.268	599.662	642.86
Q91XY8	Pcdhga11	Protocadherin gamma A11 OS=Mus musculus GN=Pcdhga11 PE=1 SV=1	561.642	503.379	559.983	572.724	536.721	713.381	740.091	745.319	692.275	657.932	762.138	728.196	566.3	601.591	651.991	667.641	681.282	633.189	579.347	699.44	722.534	654.596	631.939	599.861
Q3U3J1	Bckdha	2-oxoisovalerate dehydrogenase subunit alpha, mitochondrial OS=Mus musculus GN=Bckdha PE=1 SV=1	678.929	666.267	622.036	644.158	700.714	649.608	583.012	614.37	592.995	638.503	641.152	688.837	666.709	649.438	670.612	669.353	623.137	641.468	584.664	605.876	613.721	686.343	620.423	657.565
F7BAB2	Tmem132b	Transmembrane protein 132B OS=Mus musculus GN=Tmem132b PE=1 SV=1	596.028	587.977	579.819	651.318	602.032	601.397	673.695	649.952	677.686	674.231	682.702	699.257	596.072	671.284	632.896	642.717	614.528	620.673	678.717	656.894	648.586	605.677	642.425	583.671
E9Q7X7	Nrxn2	Neurexin II OS=Mus musculus GN=Nrxn2 PE=1 SV=1	632.788	664.589	609.505	659.264	640.244	647.655	578.239	601.187	533.473	594.949	615.31	547.807	529.008	531.901	632.367	622.082	580.899	567.912	511.671	580.946	559.588	548.906	591.857	583.606
Q8BFY6	Pef1	Peflin OS=Mus musculus GN=Pef1 PE=1 SV=1	706.876	672.012	657.137	732.238	673.383	689.116	537.049	582.758	544.141	546.213	546.321	461.894	695.138	596.206	550.327	504.483	652.234	548.792	657.924	626.496	598.137	584.382	620.393	808.792
P63085	Mapk1	Mitogen-activated protein kinase 1 OS=Mus musculus GN=Mapk1 PE=1 SV=3	616.268	626.981	650.598	649.221	626.554	630.621	632.76	601.364	569.046	586.976	588.348	604.731	647.589	638.228	609.728	600.825	630.727	650.394	660.85	615.081	595.499	586.597	564.578	581.288
E9Q947	Nol4	Nucleolar protein 4 OS=Mus musculus GN=Nol4 PE=1 SV=1	NA	719.272	NA	645.138	NA	555.119	855.386	NA	NA	NA	667.219	610.268	NA	NA	523.38	NA	NA	817.694	1044.67	614.232	NA	1669.36	NA	NA
Q8C5H8-3	Nadk2	Isoform 3 of NAD kinase 2, mitochondrial OS=Mus musculus GN=Nadk2	587.089	591.356	644.377	643.637	602.236	596.984	644.129	661.493	605.598	662.876	721.499	603.098	538.051	572.503	609.535	657.114	623.718	657.458	598.388	674.574	630.445	644.977	663.409	607.379
O55042	Snca	Alpha-synuclein OS=Mus musculus GN=Snca PE=1 SV=2	624.182	645.52	574.63	730.336	606.045	644.127	609.423	615.983	510.69	536.941	497.261	501.495	401.867	435.108	525.153	574.876	427.84	474.338	567.352	561.101	492.481	403.585	546.932	671.673
P28663	Napb	Beta-soluble NSF attachment protein OS=Mus musculus GN=Napb PE=1 SV=2	648.139	651.544	666.571	705.699	661.487	640.282	651.551	628.111	605.623	608.619	642.665	628.076	591.466	608.09	604.235	620.339	601.577	609.719	666.857	655.455	654.35	604.934	659.015	645.02
Q8K221	Arfip2	Arfaptin-2 OS=Mus musculus GN=Arfip2 PE=1 SV=2	594.347	642.497	599.009	627.222	595.181	576.569	675.015	643.748	645.934	623.619	636.99	643.103	629.943	650.291	652.681	656.109	632.241	605.364	596.874	597.138	600.22	583.655	588.12	568.205
P26231	Ctnna1	Catenin alpha-1 OS=Mus musculus GN=Ctnna1 PE=1 SV=1	635.815	616.004	602.972	614.843	598.735	612.967	600.103	603.205	614.717	606.87	612.076	608.638	628.683	621.276	616.696	623.358	630.352	651.314	592.091	616.499	613.031	643.886	627.057	635.537
Q8BGN8-2	Synpr	Isoform 2 of Synaptoporin OS=Mus musculus GN=Synpr	648.74	557.459	642.179	673.64	587.258	655.867	508.501	569.384	565.937	563.879	554.269	673.594	708.449	667.128	645.346	676.527	672.106	689.664	649.962	520.086	572.351	537.582	592.763	585.452
O35607	Bmpr2	Bone morphogenetic protein receptor type-2 OS=Mus musculus GN=Bmpr2 PE=1 SV=1	608.741	588.06	622.252	625.008	613.308	673.309	563.407	620.029	561.169	703.936	662.355	645.014	756.774	618.222	646.126	676.68	698.247	689.39	534.177	525.852	610.657	608.462	508.888	536.072
P62743	Ap2s1	AP-2 complex subunit sigma OS=Mus musculus GN=Ap2s1 PE=1 SV=1	650.966	674.49	675.348	649.031	627.981	653.954	586.945	605.382	586.088	552.555	549.095	585.638	634.845	625.085	576.877	536.697	634.068	537.566	666.155	614.332	582.961	575.504	611.345	733.51
P60202	Plp1	Myelin proteolipid protein OS=Mus musculus GN=Plp1 PE=1 SV=2	652.935	592.654	599.126	598.453	614.215	577.459	535.472	545.95	556.119	502.129	527.597	538.918	634.334	689.737	666.023	656.414	668.323	565.924	725.403	695.135	614.067	635.951	649.447	577.495
Q9D1X0	Nol3	Nucleolar protein 3 OS=Mus musculus GN=Nol3 PE=1 SV=1	648.118	674.945	624.357	611.586	630.545	671.932	583.91	577.324	588.443	572.851	578.293	618.355	660.688	577.569	620.844	553.225	608.799	605.724	684.39	684.375	616.223	633.284	675.621	659.273
Q3TYD4	Arsg	Arylsulfatase G OS=Mus musculus GN=Arsg PE=2 SV=1	609.527	NA	527.83	563.619	457.379	527.551	NA	589.178	658.991	505.951	579.117	537.211	642.78	833.61	584.278	577.568	594.473	NA	NA	545.561	570.239	NA	623.676	642.101
Q9Z0P5	Twf2	Twinfilin-2 OS=Mus musculus GN=Twf2 PE=1 SV=1	647.744	657.004	694.393	688.649	708.509	671.304	609.95	684.529	573.477	626.575	612.784	646.642	532.931	515.954	614.128	620.688	622.402	561.142	615.634	654.576	626.215	533.951	653.789	659.025
Q00519	Xdh	Xanthine dehydrogenase/oxidase OS=Mus musculus GN=Xdh PE=1 SV=5	531.749	534.029	534.145	521.028	526.434	632.377	753.396	647.004	NA	644.576	609.799	605.242	488.624	NA	601.507	584.998	586.697	551.631	637.238	675.628	578.55	700.35	NA	521.099
Q8R2P8	Kars	Lysine--tRNA ligase OS=Mus musculus GN=Kars PE=1 SV=1	610.907	568.362	611.942	632.854	625.946	600.625	605.6	623.369	612.118	621.464	629.115	625.528	575.705	628.488	596.856	622.965	587.814	617.098	608.783	612.064	629.011	613.819	624.302	601.999
E9PVY8	Macf1	Microtubule-actin cross-linking factor 1 OS=Mus musculus GN=Macf1 PE=1 SV=2	538.777	612.1	528.146	613.951	612.492	559.05	638.536	618.841	626.436	643.485	636.272	582.543	584.675	617.241	616.061	634.123	605.428	637.065	605.711	624.531	633.126	630.103	624.808	619.047
O08553	Dpysl2	Dihydropyrimidinase-related protein 2 OS=Mus musculus GN=Dpysl2 PE=1 SV=2	587.42	612.836	623.711	629.453	650.421	597.516	632.854	631.212	635.393	631.658	689.92	690.121	676.048	729.339	646.402	645.62	636.282	694.047	679.145	652.068	654.662	658.761	637.867	578.562
Q9CQY2	Fam103a1	RNMT-activating mini protein OS=Mus musculus GN=Fam103a1 PE=3 SV=1	572.65	547.45	666.608	540.967	704.659	568.819	620.59	573.13	531.751	670.936	691.293	664.055	433.543	417.412	503.123	619.915	469.475	640.095	626.475	663.385	618.654	582.047	606.314	580.863
Q6NVF0	Ocrl	Inositol polyphosphate 5-phosphatase OCRL-1 OS=Mus musculus GN=Ocrl PE=1 SV=1	629.254	670.193	646.064	633.399	641.784	636.25	594.137	621.576	599.62	607.377	569.478	648.787	641.604	603.994	601.714	610.236	648.454	587.311	591.881	599.216	597.222	597.863	638.657	641.427
Q8C129	Lnpep	Leucyl-cystinyl aminopeptidase OS=Mus musculus GN=Lnpep PE=1 SV=1	601.013	598.073	570.529	573.973	573.1	581.59	614.678	638.935	671.507	653.745	604.237	572.305	638.094	650.57	578.568	581.726	606.506	598.942	623.759	558.238	591.856	651.16	625.259	706.14
Q01065	Pde1b	Calcium/calmodulin-dependent 3',5'-cyclic nucleotide phosphodiesterase 1B OS=Mus musculus GN=Pde1b PE=1 SV=2	673.15	731.377	624.15	686.361	640.573	618.26	653.594	629.093	658.813	651.508	686.832	695.112	586.409	620.051	645.845	615.157	617.904	655.419	692.232	614.574	604.345	651.984	712.016	650.867
O88271	Cfdp1	Craniofacial development protein 1 OS=Mus musculus GN=Cfdp1 PE=1 SV=1	546.742	594.111	551.765	615.725	565.79	569.7	757.692	661.491	NA	669.408	790.21	679.261	606.818	NA	736.296	699.759	626.527	715.51	564.671	657.073	665.199	639.638	NA	478.385
G3UW46	Atp23	Mitochondrial inner membrane protease ATP23 homolog OS=Mus musculus GN=Atp23 PE=1 SV=1	NA	NA	592.121	580.015	565.502	NA	NA	NA	NA	655.391	639.805	NA	NA	NA	NA	434.063	NA	NA	NA	761.076	750.102	NA	NA	NA
Q91WS0	Cisd1	CDGSH iron-sulfur domain-containing protein 1 OS=Mus musculus GN=Cisd1 PE=1 SV=1	555.811	542.886	564.449	581.781	549.989	565.908	592.885	612.504	642.254	656.694	698.135	683.47	621.804	647.141	633.776	611.567	593.801	694.878	638.443	623.181	615.245	611.414	588.288	527.667
A0A0R4J099	2210016L21Rik	RIKEN cDNA 2210016L21 gene OS=Mus musculus GN=2210016L21Rik PE=1 SV=1	548.081	598.567	496.118	664.418	606.663	582.635	757.585	590.427	658.07	733.802	757.121	633.394	591.17	580.409	664.576	684.89	704.217	792.436	582.51	691.372	600.243	646.372	610.525	599.81
Q9D1J1	Necap2	Adaptin ear-binding coat-associated protein 2 OS=Mus musculus GN=Necap2 PE=1 SV=1	593.191	457.824	NA	540.154	NA	491.447	575.514	578.68	667.148	NA	695.379	590.973	897.915	727.763	652.074	NA	660.352	788.801	609.826	560.368	NA	650.937	627.579	567.312
P12815	Pdcd6	Programmed cell death protein 6 OS=Mus musculus GN=Pdcd6 PE=1 SV=2	660.984	639.511	702.674	685.833	660.469	687.661	664.457	648.963	675.541	624.437	631.585	640.062	635.927	680.051	691.013	667.483	677.724	648.112	689.285	652.187	662.116	644.856	678.039	636.304
Q9JMB8	Cntn6	Contactin-6 OS=Mus musculus GN=Cntn6 PE=1 SV=2	NA	643.303	NA	580.238	NA	597.368	636.496	NA	623.22	NA	625.522	620.278	NA	594.053	630.166	NA	NA	586.009	658.47	614.018	NA	701.944	593.297	NA
P47708	Rph3a	Rabphilin-3A OS=Mus musculus GN=Rph3a PE=1 SV=2	579.799	578.803	591.212	565.311	599.013	608.076	647.036	632.301	627.332	633.064	649.427	649.305	595.018	579.025	617.819	614.117	572.577	617.257	636.166	633.671	626.099	597.498	656.794	562.519
Q9WVQ5	Apip	Methylthioribulose-1-phosphate dehydratase OS=Mus musculus GN=Apip PE=1 SV=1	630.129	567.049	574.094	625.641	581.918	587.316	555.815	601.288	609.426	597.816	609.595	582.258	490.466	556.803	540.325	514.494	534.935	540.898	663.128	581.701	594.582	597.844	607.401	720.258
P61028	Rab8b	Ras-related protein Rab-8B OS=Mus musculus GN=Rab8b PE=1 SV=1	639.932	656.351	636.765	658.943	627.103	601.923	537.45	609.179	502.228	548.136	570.596	634.913	559.534	534.12	582.788	530.403	564.435	504.076	607.3	594.231	570.319	530.574	588.666	621.225
Q5DTY9	Kctd16	BTB/POZ domain-containing protein KCTD16 OS=Mus musculus GN=Kctd16 PE=1 SV=2	609.063	626.557	604.677	589.859	621.098	621.687	608.837	586.922	576.528	628.866	580.967	547.305	633.102	630.815	611.55	620.715	623.407	641.816	629.198	569.722	592.676	565.571	566.54	595.906
P16332	Mut	Methylmalonyl-CoA mutase, mitochondrial OS=Mus musculus GN=Mut PE=1 SV=2	595.65	584.034	631.748	600.287	620.851	578.818	619.948	606.977	643.566	602.389	617.611	641.248	671.611	669.514	650.521	629.463	650.76	643.031	606.999	584.977	662.271	631.824	609.044	644.906
Q99PI8	Rtn4r	Reticulon-4 receptor OS=Mus musculus GN=Rtn4r PE=1 SV=1	533.901	628.254	490.369	606.92	589.291	608.895	725.432	699.645	693.466	618.599	649.158	538.401	586.964	525.913	728.097	737.868	608.159	712.318	671.489	707.749	651.02	638.624	609.99	529.796
P63002-2	Aes	Isoform 2 of Amino-terminal enhancer of split OS=Mus musculus GN=Aes	582.069	594.618	522.735	635.014	525.69	603.685	662.196	597.716	772.696	593.444	682.646	789.588	697.655	868.157	725.826	577.413	653.692	666.937	545.96	558.646	503.607	625.104	655.123	580.251
Q8JZX5	Lrrc57	Leucine rich repeat containing 57 OS=Mus musculus GN=Lrrc57 PE=1 SV=1	600.744	593.389	618.994	611.428	605.218	643.349	595.617	613.805	611.648	618.648	591.172	660.745	718.301	696.65	665.315	635.927	671.318	652.714	644.308	579.157	622.198	582.489	599.139	614.908
Q9WU22	Ptpn4	Tyrosine-protein phosphatase non-receptor type 4 OS=Mus musculus GN=Ptpn4 PE=1 SV=2	623.66	644.176	595.156	450.895	479.578	532.19	662.623	758.474	689.917	675.116	741.504	623.478	640.714	521.088	610.654	689.35	684.732	623.093	708.042	649.431	659.433	604.644	607.499	552.191
O08919	Numbl	Numb-like protein OS=Mus musculus GN=Numbl PE=1 SV=3	578.799	574.171	625.786	619.626	629.247	588.463	615.144	624.001	635.058	643.604	718.056	675.816	534.259	607.514	612.639	622.606	555.593	630.726	634.279	616.553	616.087	597.189	602.347	620.625
Q80X68	Csl	Citrate synthase OS=Mus musculus GN=Csl PE=1 SV=1	584.559	597.192	624.372	610.12	603.42	596.519	620.987	622.836	597.306	612.033	574.159	598.965	583.374	602.951	588.582	587.488	585.791	602.506	649.894	639.177	605.676	604.921	623.992	623.501
P51881	Slc25a5	ADP/ATP translocase 2 OS=Mus musculus GN=Slc25a5 PE=1 SV=3	629.19	627.062	636.558	641.656	620.255	609.371	610.769	635.347	584.632	606.268	643.49	677.127	596.137	633.959	598.175	553.123	584.154	579.67	671.256	613.734	616.317	596.793	580.64	629.486
O55126	Gbas	Protein NipSnap homolog 2 OS=Mus musculus GN=Gbas PE=1 SV=1	563.838	563.232	592.244	608.444	587.051	601.624	623.371	605.937	605.934	647.322	648.513	643.129	592.457	602.12	628.599	634.436	574.121	610.514	639.478	631.55	606.328	584.718	615.875	552.064
E0CZE3	Wnk2	Serine/threonine-protein kinase WNK2 OS=Mus musculus GN=Wnk2 PE=1 SV=1	587.442	557.713	578.694	608.626	577.594	567.278	653.197	623.96	650.333	651.436	644.611	599.203	564.706	611.628	633.835	611.363	585.393	637.347	611.189	617.931	614.548	590.502	597.831	571.339
P63280	Ube2i	SUMO-conjugating enzyme UBC9 OS=Mus musculus GN=Ube2i PE=1 SV=1	578.522	609.795	592.843	592.725	572.488	570.078	595.709	596.82	649.781	647.32	634.882	653.769	638.633	643.097	647.709	669.608	645.103	669.107	612.594	596.173	644.159	608.469	599.566	548.637
Q3UGX2	Sptb	Spectrin beta chain OS=Mus musculus GN=Sptb PE=1 SV=1	621.351	632.726	625.177	602.703	615.196	609.255	595.67	605.238	600.141	590.108	589.062	603.521	622.118	606.958	593.714	592.863	598.286	607.028	630.316	601.112	602.052	620.125	595.79	641.335
Q8R086	Suox	Sulfite oxidase, mitochondrial OS=Mus musculus GN=Suox PE=1 SV=2	595.239	651.282	653.66	557.509	605.834	640.166	686.345	718.461	659.651	607.548	606.065	480.514	629.721	640.65	634.101	601.145	613.244	691.326	653.231	641.752	628.689	758.867	684.409	632.627
F8VPP8	Zc3h7b	Zinc finger CCCH type-containing 7B OS=Mus musculus GN=Zc3h7b PE=1 SV=1	NA	674.253	667.031	740.367	647.665	691.929	607.725	NA	605.588	559.388	457.226	445.004	NA	336.051	548.094	663.23	NA	614.3	608.043	648.897	684.769	577.112	590.605	NA
P14094	Atp1b1	Sodium/potassium-transporting ATPase subunit beta-1 OS=Mus musculus GN=Atp1b1 PE=1 SV=1	570.384	556.622	583.478	541.138	576.386	580.948	610.297	601.453	610.765	629.294	619.038	616.695	569.355	594.291	607.817	632.011	540.726	612.887	629.568	626.918	620.686	598.4	611.67	534.881
Q63886	Ugt1a1	UDP-glucuronosyltransferase 1-1 OS=Mus musculus GN=Ugt1a1 PE=1 SV=2	657.931	NA	NA	NA	NA	606.534	NA	811.299	838.857	NA	NA	789.538	870.328	874.593	850.875	NA	888.446	NA	NA	NA	NA	NA	741.083	671.645
Q6IRU5	Cltb	Clathrin light chain B OS=Mus musculus GN=Cltb PE=1 SV=1	651.894	571.955	679.938	583.968	656.883	653.902	554.796	556.369	552.495	562.436	539.888	515.521	429.071	536.969	466.168	582.654	496.967	584.336	581.466	623.194	599.797	565.59	602.186	585.165
Q8K0T4	Katnal1	Katanin p60 ATPase-containing subunit A-like 1 OS=Mus musculus GN=Katnal1 PE=1 SV=1	617.559	642.042	590.512	555.721	543.023	588.431	630.36	657.045	671.419	627.401	635.711	641.568	614.877	619.43	631.577	627.409	626.479	598.753	617.491	625.951	614.611	603.107	604.347	634.248
Q9Z1Z0	Uso1	General vesicular transport factor p115 OS=Mus musculus GN=Uso1 PE=1 SV=2	604.565	605.069	595.842	626.509	605.472	589.697	684.288	633.869	621.793	617.645	642.593	582.108	523.086	560.707	601.579	600.35	567.75	570.401	595.413	661.032	626.047	614.391	646.375	593.439
Q9Z2I9	Sucla2	Succinate--CoA ligase [ADP-forming] subunit beta, mitochondrial OS=Mus musculus GN=Sucla2 PE=1 SV=2	632.631	628.895	641.599	595.685	606.198	615.349	577.483	602.948	578.355	592.239	549.6	544.545	519.928	566.95	537.472	544.105	550.279	533.041	594.397	625.319	595.147	575.323	586.485	622.145
Q05186	Rcn1	Reticulocalbin-1 OS=Mus musculus GN=Rcn1 PE=1 SV=1	629.264	545.287	624.228	596.198	639.962	601.943	616.387	624.503	579.804	631.73	531.067	514.511	461.414	534.537	585.487	552.811	506.954	553.311	561.827	638.471	528.822	585.785	635.375	549.845
P21614	Gc	Vitamin D-binding protein OS=Mus musculus GN=Gc PE=1 SV=2	596.801	624.691	686.469	526.706	719.158	552.33	685.448	645.7	754.368	608.656	658.112	464.834	522.702	761.185	689.348	671.462	573.466	662.951	546.726	706.734	666.328	689.993	587.79	525.323
F2Z3U4	Matn4	Matrilin-4 OS=Mus musculus GN=Matn4 PE=1 SV=1	691.956	625.447	634.023	656.308	542.982	698.266	875.193	722.333	682.001	763.277	635.356	598.835	425.659	527.906	553.986	705.024	557.949	491.281	556.198	705.942	679.522	732.093	667.431	580.8
P56480	Atp5b	ATP synthase subunit beta, mitochondrial OS=Mus musculus GN=Atp5b PE=1 SV=2	569.849	594.512	596.893	584.609	603.466	571.522	634.174	630.329	644.367	651.192	663.989	691.571	668.818	706.705	620.231	622.445	611.41	674.313	685.081	627.522	643.842	648.888	605.923	594.54
Q9D8U8	Snx5	Sorting nexin-5 OS=Mus musculus GN=Snx5 PE=1 SV=1	653.805	655.463	640.795	588.183	640.045	612.207	599.142	595.053	608.705	573.625	579.32	549.68	659.248	587.891	559.277	556.587	596.937	577.928	648.73	603.055	608.668	658.776	606.207	683.689
P19426	Nelfe	Negative elongation factor E OS=Mus musculus GN=Nelfe PE=1 SV=2	NA	NA	NA	687.953	NA	622.339	NA	NA	NA	NA	446.009	406.388	NA	NA	549.465	NA	NA	NA	NA	619.772	NA	NA	NA	NA
P17182	Eno1	Alpha-enolase OS=Mus musculus GN=Eno1 PE=1 SV=3	567.653	570.165	611.333	624.692	594.521	627.717	610.051	605.258	602.781	608.6	594.212	566.024	642.621	650.249	620.096	582.106	624.395	638.925	654.468	637.745	632.978	618.602	608.815	674.828
E9Q8N8	Slc4a4	Anion exchange protein OS=Mus musculus GN=Slc4a4 PE=1 SV=1	614.273	616.553	640.087	546.494	593.116	558.309	621.616	576.742	609.018	607.575	656.02	582.799	672.569	658.965	647.961	656.081	611.764	646.793	595.034	595.305	604.62	669.473	557.024	515.956
E9QP94	Ccdc136	Coiled-coil domain-containing protein 136 OS=Mus musculus GN=Ccdc136 PE=1 SV=1	607.403	619.473	589.35	557.015	599.136	549.911	710.595	622.831	686.46	590.929	542.794	529.382	624.544	612.899	571.822	570.984	629.051	617.603	596.129	608.209	573.755	690.412	636.118	616.63
Q8BMF4	Dlat	Dihydrolipoyllysine-residue acetyltransferase component of pyruvate dehydrogenase complex, mitochondrial OS=Mus musculus GN=Dlat PE=1 SV=2	592.41	600.147	591.629	550.64	571.99	621.929	630.81	668.111	619.91	606.705	603.832	583.149	556.927	625.832	609.279	596.921	577.628	587.115	644.672	644.13	654.074	576.549	625.901	621.191
D3YUQ5	Rundc3b	Gene model 440, (NCBI) OS=Mus musculus GN=Rundc3b PE=1 SV=1	597.776	620.201	561.946	619.5	575.254	620.226	686.937	642.875	634.616	637.283	656.717	640.528	359.109	507.07	605.677	647.157	471.832	568.656	662.739	699.622	592.272	669.216	662.61	590.956
E9QMI9	Wnk2	Serine/threonine-protein kinase WNK2 OS=Mus musculus GN=Wnk2 PE=1 SV=1	589.339	559.419	578.694	608.626	577.594	573.502	652.324	623.359	650.333	651.436	644.611	599.962	561.885	611.628	638.263	611.363	583.349	631.586	608.117	617.931	614.548	589.135	597.831	573.376
Q60737	Csnk2a1	Casein kinase II subunit alpha OS=Mus musculus GN=Csnk2a1 PE=1 SV=2	652.552	677.806	641.379	630.981	646.425	642.251	637.624	630.728	635.96	621.183	618.568	626.827	593.179	621.643	593.273	593.279	620.961	612.023	613.031	600.46	611.013	615.604	664.394	667.032
Q9DC40	Telo2	Telomere length regulation protein TEL2 homolog OS=Mus musculus GN=Telo2 PE=1 SV=2	579.134	NA	627.71	711.253	703.806	NA	NA	588	NA	545.139	825.678	NA	1035.05	NA	NA	570.952	711.148	NA	NA	668.844	615.786	NA	NA	650.086
O88343	Slc4a4	Electrogenic sodium bicarbonate cotransporter 1 OS=Mus musculus GN=Slc4a4 PE=1 SV=2	617.418	614.246	639.909	549.302	594.558	560.772	618.809	580.204	607.876	607.832	658.134	585.476	677.546	655.501	645.262	657.317	616.973	648.93	595.5	596.377	604.771	668.88	557.48	513.448
O35144	Terf2	Telomeric repeat-binding factor 2 OS=Mus musculus GN=Terf2 PE=1 SV=3	NA	NA	NA	517.838	NA	560.221	NA	NA	NA	NA	596.558	610.88	NA	NA	529.745	NA	NA	NA	NA	578.314	NA	NA	NA	NA
Q99MN9	Pccb	Propionyl-CoA carboxylase beta chain, mitochondrial OS=Mus musculus GN=Pccb PE=1 SV=2	610.032	581.894	610.05	594.565	620.294	584.156	561.592	595.372	598.7	605.044	610.961	590.777	607.495	606.09	561.61	579.397	596.153	635.521	628.14	616.554	599.202	615.156	629.61	665.122
Q3THS6	Mat2a	S-adenosylmethionine synthase isoform type-2 OS=Mus musculus GN=Mat2a PE=1 SV=2	559.711	583.795	585.562	566.048	595.823	577.87	615.864	624.045	632.849	642.721	633.372	643.703	662.242	662.248	645.61	653.874	629.261	623.494	618.597	605.414	620.445	620.577	617.763	570.828
Q8VDI9	Alg9	Alpha-1,2-mannosyltransferase ALG9 OS=Mus musculus GN=Alg9 PE=2 SV=1	556.094	587.335	534.015	631.023	542.037	566.565	692.277	658.431	697.485	682.364	776.429	621.906	610.142	644.654	639.407	728.945	639.635	716.382	624.19	613.704	661.027	629.651	695.768	435.036
A2A699	Fam171a2	Protein FAM171A2 OS=Mus musculus GN=Fam171a2 PE=1 SV=1	566.283	583.438	617.138	645.629	680.832	684.466	639.813	641.685	643.008	641.883	672.423	585.36	633.221	563.245	659.01	568.613	605.468	561.465	653.617	692.658	611.749	618.253	674.627	626.827
Q80TR8	Dcaf1	DDB1- and CUL4-associated factor 1 OS=Mus musculus GN=Dcaf1 PE=1 SV=4	NA	NA	NA	453.105	NA	NA	NA	NA	642.03	NA	643.85	NA	NA	721.341	NA	NA	NA	NA	NA	496.559	NA	NA	540.408	NA
Q9JHS9	Cwc15	Spliceosome-associated protein CWC15 homolog OS=Mus musculus GN=Cwc15 PE=1 SV=1	680.131	690.365	677.482	628.689	631.319	NA	662.437	529.508	309.303	460.103	552.285	NA	234.788	253.657	NA	393.444	355.986	453.244	676.059	682.449	473.332	542.166	681.153	653.639
Q923U0	Tom1l1	TOM1-like protein 1 OS=Mus musculus GN=Tom1l1 PE=1 SV=1	588.292	515.041	536.287	559.237	610.939	601.224	608.449	693.776	642.541	712.298	851.298	689.186	685.694	573.111	662.541	665.124	688.339	637.472	572.17	354.836	576.57	571.499	562.596	639.193
Q8K0H5	Taf10	Transcription initiation factor TFIID subunit 10 OS=Mus musculus GN=Taf10 PE=1 SV=1	566.359	691.744	540.153	626.243	532.227	593.052	739.27	741.296	775.904	633.093	688.202	631.32	550.413	690.136	623.264	663.562	628.17	820.595	598.146	639.401	589.91	705.918	676.557	548.672
Q3USB7	Plcl1	Inactive phospholipase C-like protein 1 OS=Mus musculus GN=Plcl1 PE=1 SV=3	642.272	610.553	600.269	607.352	631.466	604.176	619.287	595.337	630.505	603.601	627.846	563.454	582.762	684.71	615.802	665.011	636.645	625.624	684.223	641.186	636.114	643.076	617.94	644.503
O35621	Pmm1	Phosphomannomutase 1 OS=Mus musculus GN=Pmm1 PE=1 SV=1	613.401	588.007	619.136	611.317	602.149	611.789	589.843	621.237	631.669	605.555	597.158	650.036	652.795	604.745	633.336	634.034	631.374	687.766	610.915	608.537	623.518	620.989	594.883	608.017
E0CYV0	Pcmt1	Protein-L-isoaspartate O-methyltransferase OS=Mus musculus GN=Pcmt1 PE=1 SV=1	609.703	630.424	609.558	546.43	608.202	586.687	641.319	622.315	631.188	617.65	592.57	658.452	660.87	631.983	624.126	623.681	634.997	670.313	622.624	601.972	647.353	648.742	626.494	618.209
P97450	Atp5j	ATP synthase-coupling factor 6, mitochondrial OS=Mus musculus GN=Atp5j PE=1 SV=1	589.611	488.006	744.921	723.049	786.083	598.372	440.912	575.661	611.682	575.128	564.578	642.389	626.736	584.416	239.228	694.949	646.468	757.452	564.275	632.047	597.792	538.678	555.839	555.068
Q8BG39	Sv2b	Synaptic vesicle glycoprotein 2B OS=Mus musculus GN=Sv2b PE=1 SV=1	665.112	640.744	632.309	714.621	664.442	680.731	552.07	614.258	501.663	568.633	524.648	526.286	550.313	515.531	555.308	607.621	585.963	487.391	604.345	572.321	573.458	484.639	572.908	621.997
Q61838	Pzp	Pregnancy zone protein OS=Mus musculus GN=Pzp PE=1 SV=3	626.072	685.663	579.715	547.07	688.674	591.326	699.961	623.363	730.027	571	606.372	589.535	627.982	569.778	661.457	527.288	613.34	605.969	635.053	680.125	789.524	725.786	760.265	633.328
Q9Z0U1	Tjp2	Tight junction protein ZO-2 OS=Mus musculus GN=Tjp2 PE=1 SV=2	633.805	588.652	618.357	563.282	589.541	609.201	634.803	593.961	657.433	621.617	670.367	556.773	678.978	658.362	651.563	714.49	638.882	690.989	603.116	658.29	678.376	700.489	638.81	619.12
P63213	Gng2	Guanine nucleotide-binding protein G(I)/G(S)/G(O) subunit gamma-2 OS=Mus musculus GN=Gng2 PE=1 SV=2	667.779	649.733	637.024	675.205	695.043	723.625	650.393	609.932	574.652	597.903	610.687	505.765	601.414	631.355	624.387	591.364	616.026	649.059	570.552	599.433	583.002	596.751	618.295	650.299
Q99JT9	Adi1	1,2-dihydroxy-3-keto-5-methylthiopentene dioxygenase OS=Mus musculus GN=Adi1 PE=1 SV=1	670.222	690.451	546.289	NA	895.108	741.961	506.016	682.405	551.651	529.641	NA	502.556	653.075	653.62	588.184	611.149	629.522	738.135	733.57	NA	540.166	560.906	714.025	567.52
Q3UMT1	Ppp1r12c	Protein phosphatase 1 regulatory subunit 12C OS=Mus musculus GN=Ppp1r12c PE=1 SV=1	591.905	571.192	619.912	617.655	616.881	593.14	658.497	622.47	691.751	659.555	687.588	608.804	543.326	598.597	625.158	721.237	617.99	687.551	634.263	619.333	651.333	628.753	660.039	568.634
Q7TQG1	Plekha6	Pleckstrin homology domain-containing family A member 6 OS=Mus musculus GN=Plekha6 PE=1 SV=1	641.931	586.759	541.796	591.247	637.433	608.285	667.83	622.089	697.226	674.375	753.416	661.58	697.649	641.97	681.928	718.776	646.51	691.822	600.566	634.169	640.447	649.166	597.073	639.813
Q8R5H1	Usp15	Ubiquitin carboxyl-terminal hydrolase 15 OS=Mus musculus GN=Usp15 PE=1 SV=1	618.566	603.6	610.528	608.183	611.69	649.996	581.697	581.251	553.787	612.336	622.856	623.592	600.946	563.107	573.925	547.867	568.872	612.411	662.106	592.925	566.619	622.665	608.376	633.592
P48962	Slc25a4	ADP/ATP translocase 1 OS=Mus musculus GN=Slc25a4 PE=1 SV=4	620.43	617.87	618.569	639.994	601.398	611.429	600.633	630.468	573.024	602.889	638.166	659.795	587.313	617.496	614.479	573.152	581.748	597.461	666.691	613.751	600.671	593.423	590.965	617.091
P37040	Por	NADPH--cytochrome P450 reductase OS=Mus musculus GN=Por PE=1 SV=2	634.296	636.533	662.147	652.033	649.788	665.342	586.786	632.993	582.37	576.495	614.965	547.183	492.26	602.634	566.226	546.136	561.577	586.233	667.388	641.467	611.359	630.555	626.059	654.813
G3UVU5	Tbc1d14	TBC1 domain family member 14 OS=Mus musculus GN=Tbc1d14 PE=1 SV=1	599.778	NA	NA	NA	NA	513.339	NA	616.415	NA	NA	NA	615.765	669.27	NA	684.864	NA	687.348	NA	NA	NA	NA	NA	NA	603.616
Q8CA95-3	Pde10a	Isoform 3 of cAMP and cAMP-inhibited cGMP 3',5'-cyclic phosphodiesterase 10A OS=Mus musculus GN=Pde10a	638.824	656.719	564.917	717.643	610.493	592.466	562.068	603.393	502.223	596.102	577.001	611.086	582.336	509.679	512.412	590.763	577.223	488.12	616.153	597.191	570.931	545.756	639.292	708.899
P83870	Phf5a	PHD finger-like domain-containing protein 5A OS=Mus musculus GN=Phf5a PE=1 SV=1	627.527	540.519	559.417	505.612	553.568	576.723	568.976	632.176	670.403	645.011	644.058	600.329	609.307	626.088	619.298	653.106	607.332	651.36	561.751	531.419	624.932	577.229	574.739	531.65
Q8C729-2	Fam126b	Isoform 2 of Protein FAM126B OS=Mus musculus GN=Fam126b	584.234	573.466	608.773	601.271	630.164	612.483	618.439	594.299	672.754	650.672	621.489	622.982	621.206	655.779	640.172	656.699	596.134	672.214	619.546	577.257	640.946	640.308	628.271	597.603
P23953	Ces1c	Carboxylesterase 1C OS=Mus musculus GN=Ces1c PE=1 SV=4	513.855	608.466	610.554	531.515	547.858	570.817	623.053	641.403	824.957	590.364	586.967	576.344	811.719	752.984	757.988	614.582	605.871	845.986	646.665	628.265	704.417	725.341	514.827	615.427
E9Q284	Coil	Coilin OS=Mus musculus GN=Coil PE=1 SV=1	588.418	709.436	681.997	552.36	688.475	NA	651.241	600.367	718.458	543.589	555.876	NA	513.493	546.398	NA	527.466	525.159	499.045	597.299	667.76	485.272	626.023	670.074	548.235
Q8BH79	Ano10	Anoctamin-10 OS=Mus musculus GN=Ano10 PE=1 SV=1	681.01	582.732	668.954	662.937	705.276	670.271	665.129	586.937	467.756	570.946	516.43	537.184	675.014	492.682	585.704	614.934	630.069	735.553	648.107	600.264	677.699	706.381	656.688	740.603
Q8VCK5	Klhl20	Kelch-like protein 20 OS=Mus musculus GN=Klhl20 PE=2 SV=2	562.081	531.254	593.366	NA	628.459	618.949	629.731	611.339	NA	655.203	NA	802.072	652.711	NA	778.877	719.246	600.201	604.572	645.036	NA	662.685	567.557	NA	502.931
P47867	Scg3	Secretogranin-3 OS=Mus musculus GN=Scg3 PE=1 SV=1	480.995	481.049	NA	739.287	NA	598.409	570.955	491.545	627.693	NA	687.817	779.99	435.358	568.038	538.78	NA	605.843	638.237	596.706	595.606	NA	596.458	584.953	517.159
Q99JX3	Gorasp2	Golgi reassembly-stacking protein 2 OS=Mus musculus GN=Gorasp2 PE=1 SV=3	583.41	611.415	591.215	609.622	599.019	581.09	672.22	616.56	624.683	630.466	577.416	642.265	581.17	625.473	611.381	567.361	608.047	598.216	644.625	604.204	606.379	615.159	659.65	624.509
Q9Z277	Baz1b	Tyrosine-protein kinase BAZ1B OS=Mus musculus GN=Baz1b PE=1 SV=2	792.476	832.503	588.977	635.073	610.197	600.593	808.361	761.857	604.826	581.193	549.613	454.879	700.029	650.406	615.197	576.431	739.023	734.7	626.42	605.213	581.064	697.446	545.371	669.686
Q99KF1	Tmed9	Transmembrane emp24 domain-containing protein 9 OS=Mus musculus GN=Tmed9 PE=1 SV=2	596.274	547.258	603.969	585.181	556.454	528.146	607.48	601.204	642.318	639.215	641.48	671.916	641.629	621.405	538.854	581.561	590.469	576.209	612.985	626.321	622.679	635.762	613.693	663.016
Q8K215	Lyrm4	LYR motif-containing protein 4 OS=Mus musculus GN=Lyrm4 PE=1 SV=1	521.177	527.05	530.074	580.087	569.29	554.257	689.481	572.242	629.994	638.605	673.616	670.869	620.728	687.644	636.199	634.557	550.303	623.742	589.062	610.446	647.667	623.421	551.09	529.425
A0A1B0GRB2	Cyth2	Cytohesin-2 OS=Mus musculus GN=Cyth2 PE=1 SV=1	579.218	619.949	625.3	626.41	615.409	695.718	721.176	619.405	660.673	618.286	619.414	649.823	672.626	674.256	687.635	647.929	636.595	704.317	654.087	645.184	610.61	637.942	577.331	605.466
Q99MK8	Grk2	Beta-adrenergic receptor kinase 1 OS=Mus musculus GN=Grk2 PE=1 SV=2	599.254	619.491	601.711	624.244	598.197	604.56	563.468	570.802	617.374	611.238	600.039	546.573	661.248	678.826	619.369	613.777	628.938	637.087	595.682	579.961	588.226	606.752	614.634	598.59
Q9D1P4	Chordc1	Cysteine and histidine-rich domain-containing protein 1 OS=Mus musculus GN=Chordc1 PE=1 SV=1	542.857	536.825	514.255	620.28	533.312	585.035	598.546	647.468	679.508	655.694	654.566	583.589	636.642	657.199	513.332	604.492	565.823	585.527	620.642	659.493	639.542	597.131	600.131	506.06
Q3V0K9	Pls1	Plastin-1 OS=Mus musculus GN=Pls1 PE=1 SV=1	594.862	545.044	597.868	575.28	592.344	558.025	614.347	559.431	627.525	608.895	602.139	630.219	694.315	656.385	639.678	632.697	647.013	632.474	597.229	652.331	648.005	656.395	647.579	580.792
Q80W21	Gstm7	Glutathione S-transferase Mu 7 OS=Mus musculus GN=Gstm7 PE=1 SV=1	606.032	598.602	657.876	618.065	621.746	622.204	557.543	569.954	578.862	578.704	597.596	496.371	583.096	588.969	601.854	642.041	623.708	616.31	634.804	620.409	623.73	656.029	602.41	564.719
Q8C2Q7	Hnrnph1	Heterogeneous nuclear ribonucleoprotein H OS=Mus musculus GN=Hnrnph1 PE=1 SV=1	680.017	681.066	666.184	629.784	644.961	639.5	605.974	598.548	588.984	582.109	603.508	578.826	593.863	630.982	566.986	552.117	584.907	619.786	652.139	620.646	581.635	636.906	605.929	649.101
O35551-6	Rabep1	Isoform 6 of Rab GTPase-binding effector protein 1 OS=Mus musculus GN=Rabep1	647.608	644.145	649.252	622.842	617.769	653.854	607.2	632.929	617.873	633.579	640.902	587.977	550.083	567.717	633.355	623.126	576.188	613.069	658.644	654.054	602.094	653.652	640.477	640.975
Q6ZWV3	Rpl10	60S ribosomal protein L10 OS=Mus musculus GN=Rpl10 PE=1 SV=3	686.815	656.428	658.917	641.404	648.649	702.314	593.379	577.245	535.772	561.514	536.987	565.234	507.621	534.832	600.687	537.352	543.573	567.231	612.715	636.642	591.047	605.851	595.755	629.793
Q9Z0V7	Timm17b	Mitochondrial import inner membrane translocase subunit Tim17-B OS=Mus musculus GN=Timm17b PE=1 SV=1	499.463	588.936	540.711	473.674	501.184	537.059	588.925	599.126	640.39	598.884	666.967	693.92	691.998	636.754	552.395	593.076	652.262	601.056	566.75	604.755	592.007	629.233	522.596	627.229
P68404-2	Prkcb	Isoform Beta-II of Protein kinase C beta type OS=Mus musculus GN=Prkcb	619.299	606.226	578.94	621.164	598.47	616.859	572.344	583.133	567.935	615.268	560.385	615.351	577.001	594.071	563.987	620.089	566.49	588.294	650.551	609.023	584.515	563.626	608.315	618.624
P15626	Gstm2	Glutathione S-transferase Mu 2 OS=Mus musculus GN=Gstm2 PE=1 SV=2	609.739	622.922	663.17	598.448	601.513	594.146	557.192	576.918	579.533	578.109	584.675	524.043	573.238	610.179	623.928	638.448	626.884	612.986	626.153	616.815	638.887	650.033	596.635	578.92
P48455	Ppp3cc	Serine/threonine-protein phosphatase 2B catalytic subunit gamma isoform OS=Mus musculus GN=Ppp3cc PE=1 SV=1	672.172	710.945	698.517	727.426	747.646	697.696	698.839	663.245	592.538	645.914	647.919	723.813	655.971	660.733	709.765	658.766	656.455	678.539	731.131	673.03	602.221	642.973	614.806	615.812
Q9DB05	Napa	Alpha-soluble NSF attachment protein OS=Mus musculus GN=Napa PE=1 SV=1	621.033	593.927	602.523	617.112	596.086	605.258	603.624	613.28	608.104	594.322	608.753	599.386	607.136	607.041	593.774	604.48	599.334	598.588	652.863	604.219	615.335	606.688	611.954	629.286
Q9ESX5	Dkc1	H/ACA ribonucleoprotein complex subunit 4 OS=Mus musculus GN=Dkc1 PE=1 SV=4	538.436	615.057	504.085	601.441	635.258	NA	762.004	652.562	675.932	620.785	641.223	NA	508.584	496.489	NA	565.96	589.521	593.394	569.073	654.405	638.341	714.774	730.445	599.224
Q8BZN6-3	Dock10	Isoform 3 of Dedicator of cytokinesis protein 10 OS=Mus musculus GN=Dock10	584.768	604.821	567.139	587.355	614.084	625.751	618.939	580.547	626.581	654.953	653.377	626.724	737.042	661.275	647.181	618.663	659.552	648.343	618.967	621.96	638.084	674.441	651.777	624.581
Q8CIE6	Copa	Coatomer subunit alpha OS=Mus musculus GN=Copa PE=1 SV=2	603.262	641.974	642.112	623.686	639.451	596.946	612.957	636.447	634.509	624.902	620.867	664.456	625.341	626.995	619.933	600.023	631.843	593.429	624.503	634.364	632.039	608.899	619.673	624.218
Q8BMJ2	Lars	Leucine--tRNA ligase, cytoplasmic OS=Mus musculus GN=Lars PE=1 SV=2	629.5	637.934	641.465	621.521	607.306	662.027	615.235	634.022	582.153	580.015	601.723	507.365	554.691	541.284	592.602	572.116	569.37	559.058	623.703	615.988	618.019	612.849	618.526	641.946
Q3TVK3	Dnpep	Aspartyl aminopeptidase OS=Mus musculus GN=Dnpep PE=1 SV=1	615.574	637.459	627.757	604.057	618.749	587.779	641.027	668.337	701.598	645.894	668.256	689.766	675.997	702.935	662.169	640.937	671.721	599.155	588.799	569.511	649.46	645.446	635.442	617.772
Q8BL66	Eea1	Early endosome antigen 1 OS=Mus musculus GN=Eea1 PE=1 SV=2	611.163	588.78	601.022	600.519	616.299	620.833	621.635	640.906	621.194	645.028	629.659	574.524	588.334	603.682	618.825	611.177	592.213	637.877	605.972	634.904	631.418	643.531	614.595	602.551
P63089	Ptn	Pleiotrophin OS=Mus musculus GN=Ptn PE=1 SV=1	731.041	590.153	754.854	626.796	665.569	636.742	506.65	469.662	518.34	499.92	528.568	688.684	371.765	669.455	606.477	481.105	460.771	654.011	605.559	528.892	510.037	558.258	610.068	612.156
Q9R0Q6	Arpc1a	Actin-related protein 2/3 complex subunit 1A OS=Mus musculus GN=Arpc1a PE=1 SV=1	652.806	879.34	656.787	763.441	672.009	649.448	755.973	635.796	534.155	611.331	593.771	625.436	516.387	532.865	614.969	639.132	570.585	666.799	770.096	621.556	633.496	585.307	659.883	646.697
P97807	Fh	Fumarate hydratase, mitochondrial OS=Mus musculus GN=Fh PE=1 SV=3	601.054	600.163	598.409	568.311	590.643	597.41	636.929	621.34	643.37	607.273	592.961	586.918	593.817	624.543	598.066	562.76	597.195	623.423	608.253	617.685	650.443	619.606	651.318	643.396
E9QPX3	Ndufs4	NADH dehydrogenase [ubiquinone] iron-sulfur protein 4, mitochondrial OS=Mus musculus GN=Ndufs4 PE=1 SV=1	603.768	570.392	583.776	580.612	565.023	616.642	637.964	639.384	639.843	629.99	615.883	577.853	546.382	567.888	638.163	643.36	547.398	587.381	640.658	618.742	639.837	579.771	594.706	575.813
P21981	Tgm2	Protein-glutamine gamma-glutamyltransferase 2 OS=Mus musculus GN=Tgm2 PE=1 SV=4	585.095	627.568	627.378	642.554	614.807	586.296	794.466	634.317	696.4	697.335	712.88	668.461	649.096	684.23	661.841	625.731	673.031	710.307	594.136	705.797	725.157	690.507	584.851	622.634
P09240	Cck	Cholecystokinin OS=Mus musculus GN=Cck PE=1 SV=3	720.933	700.511	773.001	838.347	730.82	783.601	702.047	618.127	494.017	663.093	615.883	354.666	299.687	370.45	660.073	599.203	456.798	532.051	600.386	777.941	656.243	525.684	626.97	434.259
Q60928	Ggt1	Gamma-glutamyltranspeptidase 1 OS=Mus musculus GN=Ggt1 PE=1 SV=1	597.771	644.995	NA	598.82	NA	NA	582.803	586.056	615.587	NA	615.94	NA	781.576	699.194	NA	NA	737.529	664.613	668.123	601.61	NA	714.116	641.488	760.357
P08226	Apoe	Apolipoprotein E OS=Mus musculus GN=Apoe PE=1 SV=2	582.916	640.526	570.676	621.49	606.767	614.381	611.091	691.324	586.118	614.929	693.215	621.552	529.85	465.357	588.173	553.017	569.605	465.921	590.001	778.436	580.253	581.529	703.717	688.335
O70591	Pfdn2	Prefoldin subunit 2 OS=Mus musculus GN=Pfdn2 PE=1 SV=2	574.273	584.008	571.929	591.273	610.335	602.42	629.855	605.065	636.181	666.898	619.443	670.215	586.306	643.432	595.27	640.858	590.673	647.743	597.988	582.456	607.508	648.248	604.94	566.488
A2AFQ2	Hsd17b10	3-hydroxyacyl-CoA dehydrogenase type-2 OS=Mus musculus GN=Hsd17b10 PE=1 SV=1	607.608	611.277	617.241	673.631	636.138	606.327	597.089	616.51	557.243	623.369	581.058	634.021	612.841	581.007	624.894	615.187	623.006	568.241	582.15	591.212	609.484	577.601	585.406	665.195
Q3TXS7	Psmd1	26S proteasome non-ATPase regulatory subunit 1 OS=Mus musculus GN=Psmd1 PE=1 SV=1	597.922	599.044	576.259	608.65	580.088	585.738	617.299	618.109	596.453	651.608	632.82	661.109	641.846	585.956	611.127	655.186	618.526	600.922	584.189	598.932	636.532	588.713	618.68	616.568
Q6P4T1	Snx19	Sorting nexin-19 OS=Mus musculus GN=Snx19 PE=1 SV=1	696.348	698.634	652.729	577.445	589.801	628.238	617.573	619.13	555.257	609.911	572.618	548.511	702.106	711.54	572.899	545.102	634.714	609.77	669.642	669.508	520.383	689.658	680.65	662.211
Q9JKY0	Cnot9	CCR4-NOT transcription complex subunit 9 OS=Mus musculus GN=Cnot9 PE=1 SV=1	599.111	NA	664.345	579.296	559.87	548.71	NA	654.565	615.1	588.204	600.883	612.091	673.92	597.415	633.584	572.014	625.957	NA	NA	621.868	617.125	NA	654.475	628.736
E9QPD7	Pcx	Pyruvate carboxylase OS=Mus musculus GN=Pcx PE=1 SV=1	585.983	619.325	618.235	593.416	576.199	589.936	631.427	616.034	632.336	635.941	643.029	620.294	601.124	666.759	655.109	629.832	611.709	677.622	650.061	611.025	657.756	642.465	636.367	605.28
Q9Z0M5	Lipa	Lysosomal acid lipase/cholesteryl ester hydrolase OS=Mus musculus GN=Lipa PE=1 SV=2	604.935	NA	NA	638.08	NA	583.061	NA	536.979	NA	NA	642.426	582.908	689.442	NA	646.055	NA	660.626	NA	NA	672.962	NA	NA	NA	534.538
P52800	Efnb2	Ephrin-B2 OS=Mus musculus GN=Efnb2 PE=1 SV=1	543.634	596.614	663.999	764.879	748.48	641.466	564.068	471.774	743.428	662.872	820.687	470.455	321.695	510.307	600.006	600.301	503.425	444.435	573.121	791.063	546.277	493.249	677.207	494.89
Q60823	Akt2	RAC-beta serine/threonine-protein kinase OS=Mus musculus GN=Akt2 PE=1 SV=1	580.56	613.047	609.106	554.528	591.742	587.522	592.062	546.8	575.056	575.696	593.036	543.814	579.692	660.352	581.568	612.839	572.693	570.023	613.883	629.897	619.328	593.542	585.525	570.024
O70433	Fhl2	Four and a half LIM domains protein 2 OS=Mus musculus GN=Fhl2 PE=1 SV=1	685.903	653.554	693.477	695.331	677.425	720.321	691.293	592.324	513.444	556.088	558.587	392.618	370.365	506.311	557.024	526.792	443.893	547.455	584.095	595.565	561.649	534.671	659.85	638.517
Q9QYE9-2	Plekhb1	Isoform 2 of Pleckstrin homology domain-containing family B member 1 OS=Mus musculus GN=Plekhb1	615.272	580.942	561.666	583.349	594.821	559.337	680.269	549.833	706.263	612.424	634.041	595.801	664.53	575.443	659.845	651.829	573.284	613.062	673.16	721.323	646.529	687.031	653.815	529.872
Q60769	Tnfaip3	Tumor necrosis factor alpha-induced protein 3 OS=Mus musculus GN=Tnfaip3 PE=1 SV=2	NA	NA	NA	631.355	NA	607.195	NA	NA	NA	NA	393.258	279.251	NA	NA	349.461	NA	NA	NA	NA	604.476	NA	NA	NA	NA
Q9QZ73	Dcun1d1	DCN1-like protein 1 OS=Mus musculus GN=Dcun1d1 PE=1 SV=1	627.102	575.785	629.87	610.189	597.981	638.654	516.569	594.354	538.476	598.525	534.812	526.659	519.997	518.259	505.522	577.508	574.008	498.433	550.973	564.065	589.01	498.155	590.153	604.55
Q9CQJ2	Pih1d1	PIH1 domain-containing protein 1 OS=Mus musculus GN=Pih1d1 PE=1 SV=1	539.052	593.145	594.439	NA	592.255	503.595	595.19	640.57	716.077	648.6	NA	614.074	613.692	632.197	573.41	664.664	648.434	584.477	663.743	NA	605.469	596.723	639.318	538.416
Q9EQ80	Nif3l1	NIF3-like protein 1 OS=Mus musculus GN=Nif3l1 PE=1 SV=4	561.623	569.286	552.672	585.692	557.099	569.633	659.86	597.099	646.991	625.336	673.4	660.459	589.313	695.132	577.387	635.513	605.735	619.06	592.109	627.203	583.404	623.268	607.063	600.44
P10639	Txn	Thioredoxin OS=Mus musculus GN=Txn PE=1 SV=3	661.251	619.37	604.776	597.389	570.681	581.951	530.87	609.611	591.596	580.07	529.064	570.232	549.085	579.388	565.22	596.188	608.656	562.208	574.204	578.815	582.411	532.349	584.304	574.261
B1AWV9	Slc4a10	Anion exchange protein OS=Mus musculus GN=Slc4a10 PE=1 SV=1	679.708	641.533	708.44	674.328	708.641	700.867	612.399	624.226	580.021	556.452	514.431	533.873	595.533	571.528	580.994	556.901	600.879	598.387	687.987	641.118	594.954	583.444	609.991	665.848
Q3ULQ2	Pin1rt1	Peptidyl-prolyl cis-trans isomerase OS=Mus musculus GN=Pin1rt1 PE=1 SV=1	652.921	593.25	632.094	525.451	589.346	621.684	534.949	514.909	539.442	620.206	494.014	593.845	642.976	664.808	545.901	610.429	627.351	702.952	653.298	573.955	584.191	626.206	540.22	696.19
P63028	Tpt1	Translationally-controlled tumor protein OS=Mus musculus GN=Tpt1 PE=1 SV=1	652.029	639.884	659.656	664.791	669.237	637.617	613.896	621.427	583.447	595.969	586.153	620.718	582.838	612.124	597.83	631.55	609.369	585.4	623.623	606.497	601.208	567.234	609.048	634.683
A2AG30	Dnajb5	DnaJ (Hsp40) homolog, subfamily B, member 5, isoform CRA_a OS=Mus musculus GN=Dnajb5 PE=1 SV=1	516.329	528.83	599.314	590.251	635.153	581.29	615.16	636.917	653.393	728.63	703.957	709.568	657.872	569.531	556.42	627.468	617.103	581.022	645.375	628.402	646.904	582.633	593.401	579.918
Q8BH80	Vapb	Putative uncharacterized protein OS=Mus musculus GN=Vapb PE=1 SV=1	551.303	579.008	556.704	535.255	577.492	565.214	624.476	609.195	655.976	653.513	647.989	672.579	652.239	659.379	616.949	644.431	589.785	648.668	616.498	639.563	650.686	620.534	613.292	515.658
P14733	Lmnb1	Lamin-B1 OS=Mus musculus GN=Lmnb1 PE=1 SV=3	611.152	604.184	639.606	560.611	598.13	587.734	604.499	609.22	606.526	623.33	641.386	588.293	574.812	584.042	580.718	615.059	576.377	634.737	543.89	573.063	595.596	582.922	582.889	563.5
Q8BVY0	Rsl1d1	Ribosomal L1 domain-containing protein 1 OS=Mus musculus GN=Rsl1d1 PE=1 SV=1	568.405	567.5	444.012	552.671	550.852	562.033	677.479	704.915	632.975	593.817	657.869	676.021	706.333	641.181	652.377	650.205	591.626	665.35	648.005	670.787	529.735	719.82	523.599	590.678
Q9D8X2	Ccdc124	Coiled-coil domain-containing protein 124 OS=Mus musculus GN=Ccdc124 PE=1 SV=1	597.874	621.393	672.658	619.732	683.506	758.393	600.538	552.166	616.34	608.282	492.83	580.385	452.454	565.968	587.169	508.769	548.042	552.552	640.329	561.156	696.431	615.414	697.792	698.707
Q8CGC7	Eprs	Bifunctional glutamate/proline--tRNA ligase OS=Mus musculus GN=Eprs PE=1 SV=4	603.302	587.269	600.462	610.259	607.607	589.711	607.38	618.114	646.672	645.691	654.291	630.602	594.338	623.42	604.988	607.814	600.666	627.011	609.245	627.717	635.728	620.234	618.416	600.658
Q6PHS9-6	Cacna2d2	Isoform 6 of Voltage-dependent calcium channel subunit alpha-2/delta-2 OS=Mus musculus GN=Cacna2d2	668.403	703.313	641.036	626.536	675.141	633.315	582.741	597.246	551.968	584.729	593.112	581.959	622.658	718.42	605.188	632.016	635.107	669.346	606.133	610.683	614.69	639.861	555.872	571.708
Q9CWR2	Smyd3	Histone-lysine N-methyltransferase SMYD3 OS=Mus musculus GN=Smyd3 PE=2 SV=1	602.616	640.46	644.723	656.318	674.448	616.302	628.993	580.452	642.586	555.199	605.228	625.901	711.94	678.721	695.222	622.128	650.92	651.754	591.572	602.856	613.695	654.977	642.639	594.196
Q9DCX2	Atp5h	ATP synthase subunit d, mitochondrial OS=Mus musculus GN=Atp5h PE=1 SV=3	545.354	550.181	585.391	562.875	573.638	568.382	636.896	626.233	651.771	673	674.223	663.893	652.799	671.732	625.681	664.079	584.119	704.774	618.159	605.578	664.979	628.063	603.509	553.998
P34914	Ephx2	Bifunctional epoxide hydrolase 2 OS=Mus musculus GN=Ephx2 PE=1 SV=2	577.299	591.789	620.3	621.06	652.656	597.863	607.612	528.496	621.938	622.335	665.246	644.959	686.922	641.015	627.722	657.297	656.729	659.3	656.035	618.268	609.277	620.896	696.134	601.212
Q9JJE4	Paqr4	Progestin and adipoQ receptor family member 4 OS=Mus musculus GN=Paqr4 PE=2 SV=1	NA	NA	NA	869.072	NA	529	NA	NA	NA	NA	645.792	669.444	NA	NA	737.738	NA	NA	NA	NA	846.266	NA	NA	NA	NA
Q6NS82	Fam134a	Protein FAM134A OS=Mus musculus GN=Fam134a PE=1 SV=2	698.165	626.967	609.608	573.353	653.583	779.22	602.726	550.116	543.906	527.521	435.876	471.134	520.016	608.423	422.101	474.144	565.496	579.479	607.764	629.741	527.25	634.105	603.348	682.843
Q6PHS9	Cacna2d2	Voltage-dependent calcium channel subunit alpha-2/delta-2 OS=Mus musculus GN=Cacna2d2 PE=1 SV=1	668.403	703.313	641.036	626.536	675.141	633.315	582.741	597.246	551.958	584.729	593.112	581.959	622.658	719.446	605.188	632.016	635.107	669.346	606.133	610.683	614.69	639.861	555.002	571.708
P27671	Rasgrf1	Ras-specific guanine nucleotide-releasing factor 1 OS=Mus musculus GN=Rasgrf1 PE=1 SV=2	635.439	638.218	634.738	609.545	641.673	593.311	624.924	614.51	601.168	607.437	619.575	635.547	669.438	694.093	626.559	629.661	654.793	667.21	620.747	608.501	642.048	634.117	580.806	550.513
G5E843	Robo1	Roundabout homolog 1 OS=Mus musculus GN=Robo1 PE=1 SV=1	596.744	610.502	612.695	635.925	655.401	618.208	731.214	713.121	658.414	685.903	649.697	649.359	770.934	687.569	691.479	712.657	694.017	760.555	673.832	620.278	621.259	693.951	619.52	541.127
Q9R0N5	Syt5	Synaptotagmin-5 OS=Mus musculus GN=Syt5 PE=1 SV=1	587.811	585.252	614.331	626.048	599.923	594.601	639.243	640.466	613.804	618.458	682.183	631.946	639.253	617.648	669.925	657.848	618.155	612.266	660.521	625.174	637.89	592.649	598.924	563.592
P80313	Cct7	T-complex protein 1 subunit eta OS=Mus musculus GN=Cct7 PE=1 SV=1	603.254	577.75	593.241	605.528	611.858	614.039	600.327	609.749	589.072	617.678	644.932	625.233	615.633	567.453	584.45	590.876	594.586	621.388	639.031	614.42	619.406	628.29	615.081	589.503
Q922Q8	Lrrc59	Leucine-rich repeat-containing protein 59 OS=Mus musculus GN=Lrrc59 PE=1 SV=1	611.53	575.156	622.965	586.141	601.355	590.363	635.27	611.106	696.765	647.751	667.308	679.245	607.976	681.764	613.27	564.641	574.465	605.484	677.061	646.766	667.109	655.585	657.506	625.862
Q60902	Eps15l1	Epidermal growth factor receptor substrate 15-like 1 OS=Mus musculus GN=Eps15l1 PE=1 SV=3	602.92	615.847	594.179	590.811	584.222	600.343	646.007	645.906	625.798	641.097	633.664	648.766	647.927	599.382	631.318	608.914	643.021	636.275	614.366	629.932	629.888	632.558	630.436	625.918
P55302	Lrpap1	Alpha-2-macroglobulin receptor-associated protein OS=Mus musculus GN=Lrpap1 PE=1 SV=1	635.391	682.145	635.835	653.552	657.555	681.042	682.266	672.637	665.131	644.85	649.091	554.389	545.153	597.043	635.113	609.971	586.506	581.59	659.117	626.136	643.501	642.481	654.277	609.218
P60041	Sst	Somatostatin OS=Mus musculus GN=Sst PE=3 SV=1	629.346	530.394	716.489	819.121	627.226	866.747	404.484	465.404	NA	453.455	400.692	217.113	210.612	NA	339.803	480.037	375.371	481.446	557.476	756.852	515.488	528.659	NA	536.5
B1AR13	Cisd3	CDGSH iron-sulfur domain-containing protein 3, mitochondrial OS=Mus musculus GN=Cisd3 PE=1 SV=1	597.457	561.975	641.802	649.906	599.699	567.406	597.546	669.265	563.901	655.86	641.67	706.984	615.112	626.735	619.768	659.413	597.573	587.813	523.158	472.929	547.392	589.573	645.08	549.624
Q91Z61	Diras1	GTP-binding protein Di-Ras1 OS=Mus musculus GN=Diras1 PE=1 SV=1	650.549	623.315	618.121	631.521	636.845	633.569	591.459	613.073	547.421	558.667	534.565	448.672	396.963	451.452	613.056	508.496	497.774	509.321	602.121	642.531	606.244	593.324	642.527	639.537
Q9R111	Gda	Guanine deaminase OS=Mus musculus GN=Gda PE=1 SV=1	640.593	607.379	635.187	612.583	656.554	665.165	578.906	619.113	536.336	599.45	546.248	617.2	595.009	564.73	585.91	546.806	638.604	584.934	591.353	570.223	572.301	523.65	587.634	615.466
Q8R3Q6	Ccdc58	Coiled-coil domain-containing protein 58 OS=Mus musculus GN=Ccdc58 PE=1 SV=1	551.003	544.604	556.745	541.858	537.336	579.44	642.913	631.176	637.785	631.58	646.426	519.214	628.278	572.928	569.825	632.874	603.417	681.632	607.849	599.145	633.568	625.355	570.178	611.963
Q9JKK7	Tmod2	Tropomodulin-2 OS=Mus musculus GN=Tmod2 PE=1 SV=2	599.683	575.267	591.002	570.873	595.244	586.308	612.353	616.222	654.202	645.413	637.788	674.752	685.86	686.971	625.556	662.506	642.941	724.839	619.058	627.882	622.963	648.138	593.986	596.97
Q9QYC1	Pcnx1	Pecanex-like protein 1 OS=Mus musculus GN=Pcnx1 PE=1 SV=3	NA	552.989	NA	682.477	NA	NA	593.64	NA	331.403	NA	468.44	NA	NA	344.794	NA	NA	NA	362.016	388.121	722.684	NA	399.726	542.492	NA
Q8VDM6	Hnrnpul1	Heterogeneous nuclear ribonucleoprotein U-like protein 1 OS=Mus musculus GN=Hnrnpul1 PE=1 SV=1	546.591	582.554	540.124	601.335	602.804	589.984	603.67	589.081	622.149	658.388	618.776	623.292	645.68	639.832	616.91	674.219	620.016	669.639	591.832	586.157	622.014	662.32	570.76	575.857
Q59J78	Ndufaf2	Mimitin, mitochondrial OS=Mus musculus GN=Ndufaf2 PE=1 SV=1	572.801	561.986	577.645	509.509	528.818	581.598	601.882	629.96	679.898	686.935	765.232	748.025	624.865	596.508	648.568	673.475	571.399	638.979	614.594	583.044	625.961	623.357	614.321	559.969
Q9QXS6	Dbn1	Drebrin OS=Mus musculus GN=Dbn1 PE=1 SV=4	599.826	661.451	668.353	647.225	633.623	620.634	667.662	606.31	619.904	660.758	679.171	700.778	590.1	628.654	640.536	599.632	606.949	637.466	652.117	637.096	610.778	588.3	632.938	589.046
B1APX2	5031439G07Rik	RIKEN cDNA 5031439G07 gene OS=Mus musculus GN=5031439G07Rik PE=1 SV=1	791.075	770.212	712.391	625.102	728.801	690.132	547.728	609.777	443.971	665.203	508.428	532.174	554.202	481.429	594.529	677.287	588.787	446.539	678.664	576.081	598.945	539.836	584.903	745.949
A0A0R4J2C1	Apbb1	Amyloid beta A4 precursor protein-binding family B member 1 OS=Mus musculus GN=Apbb1 PE=1 SV=1	616.764	707.377	627.312	728.441	616.25	673.351	834.311	559.012	515.9	576.437	630.103	596.931	378.632	422.103	722.074	660.686	595.602	719.462	594.431	609.465	591.624	629.064	466.142	425.966
P11352	Gpx1	Glutathione peroxidase 1 OS=Mus musculus GN=Gpx1 PE=1 SV=2	536.862	566.901	558.551	512.931	523.033	514.381	621.587	614.72	642.052	627.954	629.497	638.546	671.345	677.495	575.419	624.585	681.067	676.986	585.105	576.256	657.004	659.789	587.316	574.132
A2A7Z6	Rab3b	Ras-related protein Rab-3B OS=Mus musculus GN=Rab3b PE=1 SV=1	687.918	666.953	627.569	669.944	572.087	604.098	542.271	608.198	505.317	544.741	515.147	578.54	518.626	481.163	518.828	517.352	570.074	514.272	607.703	567.915	559.35	542.61	589.097	712.274
Q9D051	Pdhb	Pyruvate dehydrogenase E1 component subunit beta, mitochondrial OS=Mus musculus GN=Pdhb PE=1 SV=1	600.015	610.942	595.837	572.125	569.625	579.411	617.248	632.673	596.996	614.523	581.533	634.48	574.797	599.824	594.225	581.036	563.848	598.542	670.199	623.099	621.439	595.136	621.351	632.271
Q4QQM5	Miga1	Mitoguardin 1 OS=Mus musculus GN=Miga1 PE=1 SV=1	627.401	620.62	593.387	640.329	589.004	594.167	577.985	597.487	603.778	633.046	633.416	695.266	734.547	693.541	673.782	671.726	659.731	639.844	610.768	595.902	628.689	622.678	659.469	617.797
Q61411	Hras	GTPase HRas OS=Mus musculus GN=Hras PE=1 SV=2	610.79	594.331	592.575	575.484	591.635	582.923	608.091	598.842	610.763	619.636	627.83	621.797	624.582	626.505	588.535	621.863	603.078	679.161	611.539	567.501	591.303	620.483	591.057	577.561
Q5GH67	Xkr4	XK-related protein 4 OS=Mus musculus GN=Xkr4 PE=1 SV=1	626.423	692.141	524.454	622.004	587.178	636.532	671.668	679.1	642.548	649.72	750.399	665.21	625.976	627.016	622.039	635.335	630.139	719.261	685.557	599.18	588.134	678.267	637.27	696.457
Q9D1M0	Sec13	Protein SEC13 homolog OS=Mus musculus GN=Sec13 PE=1 SV=3	628.724	604.037	626.486	658.648	590.019	615.263	593.364	608.471	566.601	595.388	578.923	549.261	457.075	540.197	595.361	599.594	580.107	560.033	578.171	634.304	631.01	565.9	626.789	593.889
Q9QXT8	Kcnip3	Calsenilin OS=Mus musculus GN=Kcnip3 PE=1 SV=2	697.092	763.453	620.383	451.237	717.158	660.365	426.609	725.936	781.515	738.398	893.032	1007.04	857.232	850.521	806.791	686.039	705.099	814.586	709.008	469.77	687.74	469.121	530.562	538.159
P61226	Rap2b	Ras-related protein Rap-2b OS=Mus musculus GN=Rap2b PE=1 SV=1	636.554	630.923	616.499	653.638	632.347	632.808	592.953	616.234	577.441	579.142	555.635	580.626	643.641	646.309	604.218	579.48	642.424	606.681	599.31	569.686	567.234	572.997	545.517	612.823
D3YVE8	Slc35g2	Solute carrier family 35 member G2 OS=Mus musculus GN=Slc35g2 PE=1 SV=1	NA	NA	NA	604.153	NA	548.042	NA	NA	NA	NA	621.606	666.486	NA	NA	626.884	NA	NA	NA	NA	749.915	NA	NA	NA	NA
A0A0G2JE93	Stard3nl	MLN64 N-terminal domain homolog OS=Mus musculus GN=Stard3nl PE=1 SV=1	NA	NA	479.235	547.024	570.114	NA	NA	NA	NA	667.865	900.884	NA	NA	NA	NA	549.855	NA	NA	NA	550.405	573.245	NA	NA	NA
Q80XD3	Rgs7	Regulator of G-protein-signaling 7 OS=Mus musculus GN=Rgs7 PE=1 SV=1	600.065	598.095	596.278	609.448	606.562	621.838	638.957	628.228	622.238	639.938	598.374	659.28	636.635	585.359	601.206	641.16	598.031	623.784	605.975	595.18	590.768	593.787	605.967	559.47
P35279-2	Rab6a	Isoform 2 of Ras-related protein Rab-6A OS=Mus musculus GN=Rab6a	672.957	720.679	645.962	697.975	679.486	645.129	570.924	573.343	549.741	591.649	553.087	581.144	560.604	547.316	534.244	615.724	574.332	539.538	609.453	605.92	571.579	548.33	610.038	707.915
Q9R1P0	Psma4	Proteasome subunit alpha type-4 OS=Mus musculus GN=Psma4 PE=1 SV=1	668.768	626.6	672.327	652.494	651.046	626.406	579.237	610.672	564.095	589.883	560.237	547.839	566.942	568.736	565.438	570.163	592.132	523.16	619.029	614.262	591.745	544.932	622.601	682.834
Q91XM9-4	Dlg2	Isoform 4 of Disks large homolog 2 OS=Mus musculus GN=Dlg2	601.337	615.953	623.08	606.173	617.542	618.087	625.453	622.299	631.619	631.526	653.611	658.813	641.554	625.723	620.571	644.143	619.245	648.749	633.214	615.821	640.593	612.814	628.656	620.173
Q69ZP3-3	Pnkd	Isoform 3 of Probable hydrolase PNKD OS=Mus musculus GN=Pnkd	NA	713.511	NA	572.101	NA	457.779	444.681	NA	463.051	NA	369.534	752.042	NA	472.149	560.016	NA	NA	211.788	416.551	525.427	NA	260.954	612.226	NA
A0A0R4J041	Mettl3	N6-adenosine-methyltransferase subunit METTL3 OS=Mus musculus GN=Mettl3 PE=1 SV=1	677.534	NA	NA	672.089	NA	NA	NA	679.209	NA	NA	653.269	NA	698.785	NA	NA	NA	792.024	NA	NA	622.665	NA	NA	NA	800.067
O35316	Slc6a6	Sodium- and chloride-dependent taurine transporter OS=Mus musculus GN=Slc6a6 PE=1 SV=2	659.943	661.987	628.033	625.126	653.612	632.436	608.658	608.982	544.426	563.702	523.594	617.141	635.58	628.457	604.862	591.286	660.883	526.078	530.144	566.877	597.875	583.206	557.283	533.255
O35593	Psmd14	26S proteasome non-ATPase regulatory subunit 14 OS=Mus musculus GN=Psmd14 PE=1 SV=2	598.761	601.61	581.229	601.596	601.451	618.939	662.053	634.819	648.042	613.931	632.793	629.266	585.464	607.058	614.824	611.607	585.234	599.804	615.124	633.208	630.084	610.6	641.226	585.523
Q8BL63	Pigk	GPI-anchor transamidase OS=Mus musculus GN=Pigk PE=1 SV=1	590.921	650.204	NA	NA	NA	680.765	536.434	622.025	507.82	NA	NA	567.401	311.89	349.389	430.684	NA	830.135	497.827	720.464	NA	NA	840.614	692.186	727.155
Q62351	Tfrc	Transferrin receptor protein 1 OS=Mus musculus GN=Tfrc PE=1 SV=1	649.394	605.198	640.206	550.827	608.365	634.685	631.907	639.641	605.953	620.04	583.978	598.819	619.555	625.993	586.185	635.041	671.871	582.856	585.108	620.018	672.256	594.133	646.687	697.892
Q64514-2	Tpp2	Isoform Short of Tripeptidyl-peptidase 2 OS=Mus musculus GN=Tpp2	633.481	639.334	608.335	620.955	602.453	604.428	597.947	623.673	609.574	597.649	598.967	666.782	608.018	605.33	587.142	587.607	612.736	532.004	620.914	617.852	605.708	579.434	617.761	669.014
O54941	Smarce1	SWI/SNF-related matrix-associated actin-dependent regulator of chromatin subfamily E member 1 OS=Mus musculus GN=Smarce1 PE=1 SV=1	689.047	635.084	626.562	660.903	584.537	638.734	660.741	565.771	713.098	532.889	692.455	547.094	250.532	369.464	614.304	587.957	466.078	618.161	665.09	650.426	564.036	638.022	817.224	607.008
Q9Z1L5	Cacna2d3	Voltage-dependent calcium channel subunit alpha-2/delta-3 OS=Mus musculus GN=Cacna2d3 PE=1 SV=1	675.361	701.422	640.289	671.698	640.579	680.674	548.845	623.428	546.956	591.123	565.96	523.61	597.446	537.54	543.623	597.684	607.149	551.382	623.375	595.559	549.641	568.499	623.668	671.862
Q61730	Il1rap	Interleukin-1 receptor accessory protein OS=Mus musculus GN=Il1rap PE=1 SV=1	646.525	597.939	588.681	629.813	570.941	609.422	587.286	603.339	634.786	596.822	693.364	568.676	645.116	724.999	652.048	633.798	657.14	626.998	659.551	690.73	622.256	606.491	569.696	565.996
Q03391	Grin2d	Glutamate receptor ionotropic, NMDA 2D OS=Mus musculus GN=Grin2d PE=1 SV=3	NA	NA	NA	759.737	NA	660.714	NA	NA	NA	NA	441.204	672.936	NA	NA	752.173	NA	NA	NA	NA	636.886	NA	NA	NA	NA
Q99K10	Nlgn1	Neuroligin-1 OS=Mus musculus GN=Nlgn1 PE=1 SV=2	567.926	663.316	554.189	624.568	669.819	673.385	589.555	574.953	529.135	725.628	698.215	706.66	702.557	560.303	554.357	606.432	664.926	615.875	597.802	606.466	755.873	612.11	610.367	637.577
P98192	Gnpat	Dihydroxyacetone phosphate acyltransferase OS=Mus musculus GN=Gnpat PE=1 SV=1	NA	NA	NA	708.105	NA	606.355	NA	NA	NA	NA	489.891	492.335	NA	NA	698.204	NA	NA	NA	NA	638.418	NA	NA	NA	NA
Q810B6	Ankfy1	Rabankyrin-5 OS=Mus musculus GN=Ankfy1 PE=1 SV=2	627.299	609.619	615.584	651.369	637.169	624.418	509.954	605.328	556.647	554.798	541.76	540.517	567.683	533.62	555.661	576.752	601.612	548.894	628.434	589.678	543.964	600.229	573.253	662.689
Q9JKK1	Stx6	Syntaxin-6 OS=Mus musculus GN=Stx6 PE=1 SV=1	602.371	569.241	615.472	576.679	601.467	591.461	615.947	613.323	629.162	706.586	641.16	675.894	720.747	684.065	613.695	745.756	654.266	703.568	628.738	571.991	634.583	644.059	584.861	681.608
Q0VBU9	Plpp4	Phospholipid phosphatase 4 OS=Mus musculus GN=Plpp4 PE=2 SV=1	NA	737.307	NA	NA	NA	693.27	718.271	NA	NA	NA	NA	708.559	NA	NA	554.954	NA	NA	613.771	602.533	NA	NA	535.479	NA	NA
Q9CQE3	Mrps17	28S ribosomal protein S17, mitochondrial OS=Mus musculus GN=Mrps17 PE=1 SV=1	657.505	750.02	558.794	640.734	596.661	637.518	605.617	601.802	435.701	527.02	623.296	713.753	571.282	542.207	597.359	655.257	558.627	530.929	654.002	591.842	575.006	515.044	527.32	685.232
Q60648	Gm2a	Ganglioside GM2 activator OS=Mus musculus GN=Gm2a PE=1 SV=2	587.194	525.809	586.673	515.936	536.083	NA	521.048	576.724	663.076	576.587	516.969	NA	727.754	687.261	NA	679.701	662.299	625.645	554.23	539.41	596.478	678.163	602.266	659.904
Q8BP48	Metap1	Methionine aminopeptidase 1 OS=Mus musculus GN=Metap1 PE=1 SV=1	685.023	804.695	714.844	690.832	682.585	705.685	532.298	604.872	631.983	585.202	539.491	672.591	623.968	675.536	649.552	590.969	654.718	533.283	690.502	619.211	617.134	584.093	572.103	706.51
Q3TXV4	Rab31	Putative uncharacterized protein OS=Mus musculus GN=Rab31 PE=1 SV=1	631.021	538.856	634.211	648.543	612.622	619.41	534.749	572.901	587.17	632.868	668.423	624.537	603.619	589.164	616.192	623.634	593.524	554.773	577.543	619.639	628.857	574.847	609.84	547.918
A0A0A0MQN4	Atg7	Ubiquitin-like modifier-activating enzyme ATG7 OS=Mus musculus GN=Atg7 PE=1 SV=1	637.351	647.143	582.92	625.477	601.237	598.317	610.182	596.547	615.562	593.231	581.705	683.461	698.741	656.16	606.622	646.507	628.69	593.011	651.367	625.685	578.625	609.333	613.75	632.862
Q8R5C5	Actr1b	Beta-centractin OS=Mus musculus GN=Actr1b PE=1 SV=1	658.982	685.672	676.246	597.27	614.237	652.38	690.796	677.729	655.493	644.953	631.343	582.097	595.331	582.341	634.211	639.658	618.218	609.007	721.48	663.321	675.196	654.957	749.418	657.967
Q91YP2	Nln	Neurolysin, mitochondrial OS=Mus musculus GN=Nln PE=1 SV=1	620.225	659.824	656.268	586.084	577.138	594.882	654.397	590.229	621.155	623.582	559.875	637.626	631.393	684.214	618.757	618.215	625.378	674.908	649.506	590.242	576.028	640.398	609.452	653.09
Q6NVE9	Pptc7	Protein phosphatase PTC7 homolog OS=Mus musculus GN=Pptc7 PE=1 SV=1	653.206	608.86	558.682	553.799	591.656	622.111	618.362	569.152	648.119	630.422	561.818	586.933	713.695	762.719	610.843	663.183	665.645	672.466	652.19	650.868	630.407	692.511	690.221	716.575
A0A0A6YW36	Rgs7	Regulator of G-protein-signaling 7 OS=Mus musculus GN=Rgs7 PE=1 SV=1	600.179	594.165	594.522	609.448	604.452	620.925	634.623	627.909	622.238	640.205	598.374	654.581	636.001	585.359	598.873	638.914	599.047	623.865	607.086	595.18	590.534	591.872	605.967	558.236
Q9Z1D1	Eif3g	Eukaryotic translation initiation factor 3 subunit G OS=Mus musculus GN=Eif3g PE=1 SV=2	571.92	573.137	561.597	577.079	547.122	595.405	686.084	619.226	623.653	615.869	604.783	633.976	654.481	649.498	598.688	662.807	612.753	678.321	594.28	602.751	660.326	682.137	647.332	568
P56379	Mp68	6.8 kDa mitochondrial proteolipid OS=Mus musculus GN=Mp68 PE=1 SV=1	577.562	538.92	586.863	608.752	565.452	556.706	627.564	597.26	582.774	615.497	697.428	638.776	620.729	613.246	647.957	579.588	573.058	593.063	611.005	646.646	636.017	579.735	565.02	482.327
G3UZE9	Map2	Microtubule-associated protein 2 (Fragment) OS=Mus musculus GN=Map2 PE=1 SV=1	632.047	625.009	588.921	669.04	626.652	615.009	686.226	664.426	670.169	644.346	743.334	696.113	587.189	590.185	613.945	600.264	599.162	671.72	609.021	624.537	647.866	623.316	645.752	599.484
Q61644	Pacsin1	Protein kinase C and casein kinase substrate in neurons protein 1 OS=Mus musculus GN=Pacsin1 PE=1 SV=1	668.75	660.662	658.487	709.633	742.377	677.418	614.411	586.121	621.143	597.021	591.066	596.06	609.365	610.724	587.088	579.764	570.024	610.324	662.262	633.094	612.124	577.653	602.235	605.474
Q91XM9-7	Dlg2	Isoform 7 of Disks large homolog 2 OS=Mus musculus GN=Dlg2	606.226	619.704	623.272	606.141	617.608	624.397	629.225	627.032	631.207	631.52	653.134	656.81	635.839	625.073	625.221	644.053	617.917	646.27	632.315	615.445	640.621	611.955	628.785	620.12
Q78ZM0	Snx3	Putative uncharacterized protein OS=Mus musculus GN=Snx3 PE=1 SV=1	574.985	596.119	590.739	534.324	589.353	595.119	612.279	610.731	607.649	618.672	593.516	629.471	684.657	610.944	674.605	633.303	624.694	619.249	600.651	586.249	638.026	631.543	587.326	578.889
Q99LI7	Cstf3	Cleavage stimulation factor subunit 3 OS=Mus musculus GN=Cstf3 PE=1 SV=1	611.409	581.75	660.435	515.249	630.104	558.567	654.972	609.794	602.801	710.857	616.502	638.741	684.075	625.075	696.83	680.202	671.478	677.766	574.498	591.439	596.743	660.333	578.151	581.918
Q6PB44	Ptpn23	Tyrosine-protein phosphatase non-receptor type 23 OS=Mus musculus GN=Ptpn23 PE=1 SV=2	588.257	606.293	591.016	631.415	597.743	585.702	669.481	602.592	660.368	638.215	669.714	603.438	609.54	594.092	630.409	643.657	601.98	635.984	612.303	669.523	651.838	645.055	641.941	601.059
Q6PHN9	Rab35	Ras-related protein Rab-35 OS=Mus musculus GN=Rab35 PE=1 SV=1	658.351	656.906	629.059	684.597	626.198	687.756	605.21	634.519	489.208	520.968	541.273	533.539	572.844	537.352	590.146	515.24	587.512	493.78	592.988	586.999	550.905	508.232	581.966	610.326
Q3UHB1	Nt5dc3	5'-nucleotidase domain-containing protein 3 OS=Mus musculus GN=Nt5dc3 PE=1 SV=1	626.753	653.964	610.734	619.376	573.435	615.518	595.024	632.032	594.441	591.561	596.09	593.309	561.53	563.999	593.688	605.808	595.253	529.033	616.024	598.917	592.096	529.417	586.452	636.698
Q91VZ6	Smap1	Stromal membrane-associated protein 1 OS=Mus musculus GN=Smap1 PE=1 SV=1	614.268	628.713	599.692	614.578	600.434	586.146	650.904	616.27	606.468	628.26	598.216	568.165	581.778	617.647	570.179	587.423	585	594.908	625.919	638.6	607.977	615.953	635.096	668.861
A0A0R4J0B5	BC017158	CDNA sequence BC017158 OS=Mus musculus GN=BC017158 PE=1 SV=1	716.995	623.003	611.889	634.313	614.294	551.354	597.568	678.537	587.802	577.991	585.744	584.879	594.825	606.263	616.456	602.459	671.507	604.848	581.538	600.529	568.905	619.796	713.065	753.313
Q8K1C9	Lrrc41	Leucine-rich repeat-containing protein 41 OS=Mus musculus GN=Lrrc41 PE=1 SV=3	NA	NA	NA	660.365	NA	689.548	NA	NA	NA	NA	796.999	640.755	NA	NA	424.608	NA	NA	NA	NA	732.044	NA	NA	NA	NA
P01631	Ig kappa chain V-II region 26-10 OS=Mus musculus	Ig kappa chain V-II region 26-10 OS=Mus musculus PE=1 SV=1	669.33	928.828	NA	NA	NA	NA	629.709	613.828	570.696	NA	NA	NA	1544.13	849.504	NA	NA	692.031	767.115	638.761	NA	NA	920.534	701.753	1244.49
Q9CXE7	Tmed5	Transmembrane emp24 domain-containing protein 5 OS=Mus musculus GN=Tmed5 PE=1 SV=1	543.353	570.446	NA	663.107	NA	572.219	633.169	612.737	775.33	NA	713.021	671.814	688.624	823.1	712.209	NA	663.656	569.241	670.063	642.378	NA	639.714	659.289	627.423
Q8BMS4	Coq3	Ubiquinone biosynthesis O-methyltransferase, mitochondrial OS=Mus musculus GN=Coq3 PE=1 SV=1	603.678	644.967	637.545	601	563.392	594.083	559.809	603.339	696.574	627.234	592.985	671.312	690.069	739.859	706.255	630.069	655.87	682.556	634.602	656.317	613.481	614.04	658.276	605.891
P03987	Ig gamma-3 chain C region OS=Mus musculus	Ig gamma-3 chain C region OS=Mus musculus PE=1 SV=2	NA	1014.08	NA	NA	NA	44.616	725.413	NA	573.537	NA	NA	628.019	NA	1269.1	968.059	NA	NA	899.875	628.913	NA	NA	1559.6	871.553	NA
Q9CRT8	Xpot	Exportin-T OS=Mus musculus GN=Xpot PE=1 SV=3	600.975	605.225	645.907	674.517	700.94	603.624	576.649	596.005	583.349	593.501	590.664	619.872	603.323	672.375	647.502	578.225	643.063	598.807	637.613	583.236	623.283	604.659	581.478	596.86
P30416	Fkbp4	Peptidyl-prolyl cis-trans isomerase FKBP4 OS=Mus musculus GN=Fkbp4 PE=1 SV=5	591.367	623.776	614.336	641.684	595.231	574.449	615.897	653.608	632.216	653.718	644.415	644.628	526.441	600.669	577.436	586.123	585.504	614.944	642.604	612.436	643.425	650.581	640.598	598.433
Q91VB8	Hba-a2	Alpha globin 1 OS=Mus musculus GN=Hba-a2 PE=1 SV=1	525.519	714.497	644.52	617.17	656.479	591.621	734.942	717.406	846.72	663.199	628.318	547.801	596.148	671.68	690.042	571.257	660.582	742.586	620.371	644.29	710.474	713.1	515.679	560.804
A2AN37	Uck1	Uridine kinase OS=Mus musculus GN=Uck1 PE=1 SV=1	530.672	572.256	571.064	505.585	561.23	612.38	837.172	633.209	781.598	728.96	684.905	714.412	696.148	777.806	785.896	688.704	633.04	821.177	654.134	558.014	703.877	750.947	579.315	443.297
Q9CZV8-3	Fbxl20	Isoform 3 of F-box/LRR-repeat protein 20 OS=Mus musculus GN=Fbxl20	704.312	708.97	694.515	634.616	674.952	615.389	620.747	637.553	633.533	560.624	572.395	567.142	671.529	646.432	616.737	573.898	691.58	560.896	659.08	593.406	602.977	595.317	619.047	671.006
Q3SXD3	Hddc2	HD domain-containing protein 2 OS=Mus musculus GN=Hddc2 PE=1 SV=1	663.407	603.059	714.791	636.175	655.215	623.966	600.349	632.997	617.128	651.12	546.245	587.404	502.376	527.832	557.933	634.053	570.448	599.338	589.038	591.21	655.818	609.118	571.745	574.119
E9Q8I7	Nfxl1	Nuclear transcription factor, X-box-binding-like 1 OS=Mus musculus GN=Nfxl1 PE=1 SV=1	648.753	481.62	505.785	534.011	475.38	659.687	528.586	567.173	503.585	531.012	391.648	197.928	225.587	243.631	481.032	493.955	332.307	362.237	423.454	561.97	565.017	506.224	609.205	488.572
Q80UG2	Plxna4	Plexin-A4 OS=Mus musculus GN=Plxna4 PE=1 SV=3	648.231	629.966	615.299	666.513	617.41	642.929	583.655	607.816	580.062	598.483	605.128	649.214	639.33	600.189	620.135	641.725	638.558	619.495	619.652	605.878	584.466	578.408	601.409	605.996
Q9DBX3	Susd2	Sushi domain-containing protein 2 OS=Mus musculus GN=Susd2 PE=1 SV=1	657.985	643.006	636.084	637.517	674.508	650.327	523.032	651.384	559.104	589.126	547.533	658.9	672.795	631.779	635.864	670.719	680.362	525.133	619.793	582.679	622.301	513.52	642.325	611.092
Q80TA1	Selenoi	Ethanolaminephosphotransferase 1 OS=Mus musculus GN=Selenoi PE=2 SV=3	697.989	680.971	638.95	NA	652.945	597.32	567.175	634.873	550.013	556.895	NA	620.102	688.212	647.371	562.505	600.076	596.342	569.804	634.106	NA	648.58	586.869	586.915	627.279
Q8K4R4	Pitpnc1	Cytoplasmic phosphatidylinositol transfer protein 1 OS=Mus musculus GN=Pitpnc1 PE=1 SV=1	604.229	551.417	599.941	567.119	600.396	592.889	617.057	638.414	664.046	624.685	607.266	633.319	740.309	697.459	600.86	627.338	609.407	602.539	591.503	591.135	578.585	593.65	597.197	583.564
Q80XN0	Bdh1	D-beta-hydroxybutyrate dehydrogenase, mitochondrial OS=Mus musculus GN=Bdh1 PE=1 SV=2	629.894	549.861	589.055	624.425	594.921	639.285	627.633	571.626	578.01	643.962	590.852	629.618	587.915	621.882	620.419	630.016	557.945	643.23	596.285	550.731	574.53	526.68	604.679	611.402
Q61171	Prdx2	Peroxiredoxin-2 OS=Mus musculus GN=Prdx2 PE=1 SV=3	612.141	628.668	656.466	614.778	633.562	593.782	598.643	653.325	593.29	583.419	626.193	618.509	662.731	622.882	607.491	603.198	608.838	619.865	621.473	644.253	584.062	637.855	644.255	615.524
Q06890	Clu	Clusterin OS=Mus musculus GN=Clu PE=1 SV=1	606.019	550.227	599.345	612.374	579.266	600.041	606.161	617.028	657.97	698.435	674.851	600.245	592.885	588.308	555.849	573.96	584.428	597.177	604.78	639.288	606.241	625.59	619.936	676.768
Q9D3A9	Ttyh1	Protein tweety homolog 1 OS=Mus musculus GN=Ttyh1 PE=1 SV=1	705.419	664.011	751.996	640.148	700.655	647.902	626.73	669.971	598.703	611.53	597.632	659.593	627.015	640.372	656.106	592.006	665.062	592.029	671.256	610.093	625.135	627.132	618.134	663.214
E9QB01	Ncam1	Neural cell adhesion molecule 1 OS=Mus musculus GN=Ncam1 PE=1 SV=2	651.23	671.315	674.386	633.794	658.718	631.876	644.772	600.669	597.54	590.874	625.998	637.53	624.97	620.628	635.667	577.412	605.835	680.527	628.174	602.446	585.318	633.722	643.635	595.364
E9PUD2	Dnm1l	Dynamin-1-like protein OS=Mus musculus GN=Dnm1l PE=1 SV=1	629.737	663.764	634.202	646.341	644.343	640.896	602.414	627.016	601.065	613.293	628.687	604.41	536.188	577.878	607.394	581.398	560.519	548.972	599.856	632.214	589.005	619.006	619.088	585.764
A0A140LIT2	Dhcr7	7-dehydrocholesterol reductase OS=Mus musculus GN=Dhcr7 PE=1 SV=1	549.486	NA	NA	NA	NA	NA	NA	669.873	738.773	NA	NA	NA	536.055	481.073	NA	NA	447.919	NA	NA	NA	NA	NA	810.602	762.695
Q9DCR2	Ap3s1	AP-3 complex subunit sigma-1 OS=Mus musculus GN=Ap3s1 PE=1 SV=2	605.125	596.35	559.584	520.763	555.383	555.422	706.622	662.654	638.3	612.484	538.462	599.198	543.09	590.776	578.187	598.257	624.447	659.695	605.613	615.675	604.097	591.624	588.487	547.971
O88531	Ppt1	Palmitoyl-protein thioesterase 1 OS=Mus musculus GN=Ppt1 PE=1 SV=2	548.158	675.994	600.931	581.648	686.279	548.809	742.992	584.963	701.291	607.575	618.148	763.768	617.398	677.454	573.375	644.251	568.344	729.418	787.185	661.529	705.345	838.509	726.075	588.086
O35685	Nudc	Nuclear migration protein nudC OS=Mus musculus GN=Nudc PE=1 SV=1	618.119	571.083	588.629	623.026	612.764	573.721	634.693	654.302	608.204	623.304	656.76	664.656	495.661	524.467	596.144	605.676	526.626	593.18	584.063	667.552	612.7	614.979	628.92	527.808
Q9Z2U1	Psma5	Proteasome subunit alpha type-5 OS=Mus musculus GN=Psma5 PE=1 SV=1	610.879	634.344	608.14	679.583	692.707	626.397	661.203	656.428	616.589	650.67	665.968	673.314	625.876	629.69	647.518	646.254	634.108	588.306	623.685	666.438	657.012	595.235	620.495	582.919
Q80W37	Snupn	Snurportin-1 OS=Mus musculus GN=Snupn PE=2 SV=1	NA	577.925	NA	NA	NA	581.724	694.704	NA	NA	NA	NA	524.343	NA	NA	673.114	NA	NA	576.504	575.015	NA	NA	595.999	NA	NA
Q61142	Spin1	Spindlin-1 OS=Mus musculus GN=Spin1 PE=1 SV=2	592.519	596.083	669.598	566.3	669.804	682.782	601.043	697.126	668.932	665.979	617.434	658.99	789.935	987.965	742.909	645.255	718.607	741.728	662.153	639.969	615.114	734.636	649.143	717.248
Q9QZI9	Serinc3	Serine incorporator 3 OS=Mus musculus GN=Serinc3 PE=1 SV=2	574.094	471.383	626.774	671.751	623.025	734.502	498.22	547.923	530.381	676.407	693.627	722.523	630.387	626.113	703.536	679.769	676.175	538.992	567.674	688.072	578.981	509.147	468.919	574.349
Q921M3	Sf3b3	Splicing factor 3B subunit 3 OS=Mus musculus GN=Sf3b3 PE=1 SV=1	598.416	674.238	651.003	650.678	654.26	604.532	579.378	623.408	592.572	601.283	599.071	612.709	589.91	585.286	591.714	608.391	617.975	577.091	614.961	613.497	607.076	604.433	589.732	565.684
P68181-4	Prkacb	Isoform 4 of cAMP-dependent protein kinase catalytic subunit beta OS=Mus musculus GN=Prkacb	651.266	681.772	630.798	750.112	673.202	650.09	662.064	648.205	510.065	576.523	591.217	619.809	565.68	508.683	616.161	574.578	593.586	546.934	583.911	638.313	570.016	554.075	602.729	583.343
Q9DC70	Ndufs7	NADH dehydrogenase [ubiquinone] iron-sulfur protein 7, mitochondrial OS=Mus musculus GN=Ndufs7 PE=1 SV=1	644.94	629.283	644.64	597.54	621.35	627.827	582.914	602.441	513.398	573.896	586.345	498.413	468.747	503.978	538.599	543.671	500.75	508.568	640.668	612.915	569.891	557.597	637.731	619.358
A0A0R4IZW9	Sdf2	Stromal cell-derived factor 2 OS=Mus musculus GN=Sdf2 PE=1 SV=1	631.145	709.477	596.82	649.813	668.007	602.316	832.557	732.369	733.996	719.396	840.787	724.371	551.315	610.076	609.564	656.453	553.059	751.732	743.52	740.71	687.888	774.684	710.906	539.532
P23440	Pde6b	Rod cGMP-specific 3',5'-cyclic phosphodiesterase subunit beta OS=Mus musculus GN=Pde6b PE=2 SV=3	890.245	NA	1126.36	NA	1123.53	835.677	NA	792.137	817.605	716.252	NA	960.011	720.45	1017.65	949.299	640.709	855.814	NA	NA	NA	884.902	NA	1108.99	736.738
Q9JJV4	Cacng4	Voltage-dependent calcium channel gamma-4 subunit OS=Mus musculus GN=Cacng4 PE=1 SV=1	NA	700.607	NA	668.864	NA	NA	473.982	NA	497.698	NA	532.297	NA	NA	576.384	NA	NA	NA	597.472	563.37	585.338	NA	672.612	518.58	NA
P04925	Prnp	Major prion protein OS=Mus musculus GN=Prnp PE=1 SV=2	597.069	524.819	587.398	610.456	613.877	646.566	586.264	604.599	541.531	556.687	600.871	434.304	549.981	549.526	695.65	653.497	609.302	674.317	549.953	572.452	604.39	568.84	649.561	599.271
Q3UHT7	Erc2	ERC protein 2 OS=Mus musculus GN=Erc2 PE=1 SV=1	611.795	616.456	649.944	631.056	631.524	633.876	605.343	602.066	590.688	622.818	588.339	581.638	604.178	557.651	592.975	606.772	590.577	607.134	629.341	602.144	591.982	609.698	591.469	619.62
Q920P5	Ak5	Adenylate kinase isoenzyme 5 OS=Mus musculus GN=Ak5 PE=1 SV=2	621.031	616.454	632.062	629.696	628.018	629.251	596.343	606.733	611.386	633.127	617.74	674.535	676.573	629.877	622.649	600.946	612.073	601.673	623.837	616.542	619.146	581.631	584.592	635.661
Q3UUF8	Ankrd34b	Ankyrin repeat domain-containing protein 34B OS=Mus musculus GN=Ankrd34b PE=1 SV=1	649.426	559.53	593.291	598.392	662.955	597.839	600.299	662.116	706.314	652.987	706.531	650.031	709.78	730.044	690.768	638.744	661.119	663.229	636.267	698.608	712.775	675.587	645.174	546.365
Q9JJI8	Rpl38	60S ribosomal protein L38 OS=Mus musculus GN=Rpl38 PE=1 SV=3	594.685	628.221	651.883	598.414	616.25	588.029	593.61	585.467	612.743	647.047	602.872	686.945	624.176	591.282	567.25	623.393	587.508	582.356	617.578	577.996	592.79	584.842	588.911	634.675
B9EJ86	Osbpl8	Oxysterol-binding protein-related protein 8 OS=Mus musculus GN=Osbpl8 PE=1 SV=1	665.32	639.09	622.451	659.762	639.667	615.355	614.16	658.266	614.039	612.992	606.826	630.46	541.947	556.656	623.758	551.924	591.985	542.198	640.454	629.276	624.123	607.054	660.689	699.624
Q8CGA3	Slc43a2	Large neutral amino acids transporter small subunit 4 OS=Mus musculus GN=Slc43a2 PE=1 SV=1	786.742	694.31	705.091	529.763	623.045	696.547	485.643	427.75	564.768	535.732	446.498	684.484	587.213	605.938	585.688	604.868	531.087	583.577	618.444	530.99	623.423	626.69	618.621	655.29
Q63844	Mapk3	Mitogen-activated protein kinase 3 OS=Mus musculus GN=Mapk3 PE=1 SV=5	593.811	589.05	601.747	617.634	587.211	602.726	625.838	603.248	620.311	613.449	621.475	601.96	642.146	674.089	664.679	641.517	633.738	695.968	646.042	629.016	637.082	650.212	590.246	545.64
Q9ESP1	Sdf2l1	Stromal cell-derived factor 2-like protein 1 OS=Mus musculus GN=Sdf2l1 PE=1 SV=2	622.795	583.511	779.847	860.579	991.906	NA	550.696	617.298	NA	785.946	816.31	NA	509.033	NA	NA	776.017	604.589	459.346	582.347	760.972	799.349	511.185	NA	794.348
Q8CHE4	Phlpp1	PH domain leucine-rich repeat-containing protein phosphatase 1 OS=Mus musculus GN=Phlpp1 PE=1 SV=2	700.345	618.484	622.047	478.592	684.041	619.996	686.499	732.105	733.571	662.105	563.299	632.102	741.905	690.511	616.622	702.559	748.644	803.476	610.464	564.381	662.084	783.921	649.788	758.42
B2RSH2	Gnai1	Guanine nucleotide-binding protein G(i) subunit alpha-1 OS=Mus musculus GN=Gnai1 PE=1 SV=1	639.702	682.686	674.239	684.445	685.798	650.572	642.119	623.861	590.219	578.064	623	632.303	625.22	681.239	645.899	611.812	638.183	635.044	672.599	641.949	614.24	622.969	656.738	609.058
Q5SYD0	Myo1d	Unconventional myosin-Id OS=Mus musculus GN=Myo1d PE=1 SV=1	646.449	573.468	592.351	590.498	599.263	597.645	609.954	559.031	592.535	566.273	587.827	555.434	609.929	657.849	593.001	656.709	627.393	594.973	650.06	624.715	645.689	655.611	606.557	575.223
Q91ZA3	Pcca	Propionyl-CoA carboxylase alpha chain, mitochondrial OS=Mus musculus GN=Pcca PE=1 SV=2	583.796	582.197	613.563	584.991	604.401	595.833	626.427	618.62	648.35	663.776	663.874	614.962	638.499	632.47	612.78	637.501	610.918	709.269	616.604	620.854	643.644	653.148	633.029	636.283
Q9WTK3	Gpaa1	Glycosylphosphatidylinositol anchor attachment 1 protein OS=Mus musculus GN=Gpaa1 PE=1 SV=3	NA	536.706	485.352	541.845	495.462	562.188	572.584	NA	NA	686.372	660.487	716.222	NA	NA	554.107	745.321	NA	579.447	581.034	482.415	618.596	578.441	NA	NA
P21550	Eno3	Beta-enolase OS=Mus musculus GN=Eno3 PE=1 SV=3	575.124	614.916	578.835	690.789	603.032	669.903	597.879	609.715	570.93	608.175	536.183	686.239	629.294	625.796	652.044	635.334	627.946	594.503	682.061	672.253	646.626	607.676	625.016	673.117
Q91YE7	Rbm5	RNA-binding protein 5 OS=Mus musculus GN=Rbm5 PE=1 SV=1	609.526	599.025	NA	580.363	NA	707.997	570.709	579.914	386.565	NA	602.006	269.706	303.662	261.962	600.756	NA	275.983	336.95	548.988	620.756	NA	468.255	526.637	532.883
Q9D6M3	Slc25a22	Mitochondrial glutamate carrier 1 OS=Mus musculus GN=Slc25a22 PE=1 SV=1	639.299	665.919	602.364	671.867	589.766	612.522	569.364	589.09	552.611	558.949	539.157	611.144	555.724	591.283	546.559	543.504	562.361	489.677	598.407	611.394	561.079	522.221	618.975	714.368
P59114	Pcif1	Phosphorylated CTD-interacting factor 1 OS=Mus musculus GN=Pcif1 PE=1 SV=1	587.192	606.359	534.336	533.352	532.069	586.284	736.219	651.192	670.811	591.46	683.198	720.892	818.557	813.642	657.417	594.543	667.36	733.611	631.464	566.439	588.653	713.104	599.538	583.499
Q9D2R8	Mrps33	28S ribosomal protein S33, mitochondrial OS=Mus musculus GN=Mrps33 PE=1 SV=1	591.267	599.022	582.7	591.011	610.172	619.842	624.319	637.161	721.749	591.476	654.638	661.437	699.9	740.478	701.162	675.172	668.478	657.092	555.262	574.89	604.76	578.234	560.922	552.581
Q8CIH9	Ppat	Amidophosphoribosyltransferase OS=Mus musculus GN=Ppat PE=1 SV=1	572.653	606.291	684.218	610.472	675.243	628.978	627.905	639.128	617.421	647.716	718.667	641.242	613.655	605.672	662.716	672.954	648.833	694.533	614.938	630.083	662.289	675.952	657.14	585.929
E9Q3X6	Maob	Amine oxidase OS=Mus musculus GN=Maob PE=1 SV=1	572.383	620.81	653.585	702.417	618.977	616.493	605.393	617.695	565.399	605.819	607.818	507.953	607.356	594.055	703.808	613.265	673.593	599.819	620.748	643.98	633.723	718.641	655.494	634.448
Q64514	Tpp2	Tripeptidyl-peptidase 2 OS=Mus musculus GN=Tpp2 PE=1 SV=3	635.737	639.67	609.21	623.701	602.698	603.312	595.168	623.184	608.163	594.695	590.983	666.336	603.531	603.728	585.782	587.223	610.203	526.159	620.92	618.798	605.418	575.628	617.576	669.234
A0A0A0MQC6	5330417C22Rik	RIKEN cDNA 5330417C22 gene OS=Mus musculus GN=5330417C22Rik PE=1 SV=1	598.199	NA	608.914	616.721	532.748	638.497	NA	593.828	550.317	582.743	551.426	352.44	276.413	276.494	575.653	433.22	391.815	NA	NA	792.543	603.224	NA	760.184	592.495
Q60714	Slc27a1	Long-chain fatty acid transport protein 1 OS=Mus musculus GN=Slc27a1 PE=1 SV=1	649.033	585.352	650.9	592.039	662.278	624.17	584.181	564.076	608.742	547.402	583.921	612.95	698.591	777.809	625.935	590.713	648.506	664.837	552.174	604.931	568.684	647.517	617.592	619.914
P0C0S6	H2afz	Histone H2A.Z OS=Mus musculus GN=H2afz PE=1 SV=2	539.978	548.082	622.744	524.667	625.259	637.933	705.429	653.019	681.245	633.618	671.723	669.671	698.12	704.049	659.149	680.764	628.937	735.559	590.562	626.444	675.615	647.665	652.501	525.998
Q3UDF0	Slc2a6	Putative uncharacterized protein OS=Mus musculus GN=Slc2a6 PE=1 SV=1	NA	NA	596.483	NA	609.218	NA	NA	NA	578.511	554.6	NA	NA	NA	765.697	NA	547.107	NA	NA	NA	NA	580.032	NA	868.657	NA
Q9JKR6	Hyou1	Hypoxia up-regulated protein 1 OS=Mus musculus GN=Hyou1 PE=1 SV=1	612.149	619.439	600.257	597.706	726.55	612.134	652.768	622.955	620.638	648.644	676.017	603.262	561.152	538.662	584.658	601.76	561.002	599.178	651.561	596.214	662.468	646.592	630.748	595.165
P47754	Capza2	F-actin-capping protein subunit alpha-2 OS=Mus musculus GN=Capza2 PE=1 SV=3	625.145	647.059	626.65	671.496	654.722	640.302	572.777	604.05	536.475	595.95	530.609	518.77	506.045	526.844	562.407	588.954	573.962	497.592	600.45	625.33	581.642	510.605	626.453	652.58
Q923T9	Camk2g	Calcium/calmodulin-dependent protein kinase type II subunit gamma OS=Mus musculus GN=Camk2g PE=1 SV=1	610.185	618.893	634.375	616.354	602.39	604.695	615.423	609.676	614.822	590.642	590.132	602.374	654.847	627.371	631.139	607.673	644.398	607.646	658.919	603.178	621.52	569.252	608.904	619.865
Q9QUR6	Prep	Prolyl endopeptidase OS=Mus musculus GN=Prep PE=1 SV=1	635.1	611.154	609.544	614.556	616.891	613.244	574.611	587.196	578.783	564.223	579.213	639.371	647.52	634.262	585.472	567.187	629.747	595.926	606.205	592.001	588.604	593.333	590.851	659.978
Q9DCL9	Paics	Multifunctional protein ADE2 OS=Mus musculus GN=Paics PE=1 SV=4	622.039	590.941	642.349	612.018	612.732	583.922	594.326	607.13	616.362	592.161	634.925	665.6	659.365	649.615	602.997	658.072	655.573	613.315	594.339	606.316	614.905	598.826	617.965	634.845
P62897	Cycs	Cytochrome c, somatic OS=Mus musculus GN=Cycs PE=1 SV=2	607.465	606.817	635.087	574.565	584.694	599.65	595.921	609.722	594.452	574.868	613.014	547.228	547.545	550.635	578.381	501.587	538.513	593.619	658.949	635.505	629.048	604.735	581.561	652.462
Q62261	Sptbn1	Spectrin beta chain, non-erythrocytic 1 OS=Mus musculus GN=Sptbn1 PE=1 SV=2	643.16	646.747	653.115	614.093	647.63	643.655	625.143	601.007	595.067	599.856	613.258	591.057	594.606	609.988	597.972	610.759	590.479	637.37	640.994	616.84	608.911	600.821	622.469	606.021
Q9JHF7	Hpgds	Hematopoietic prostaglandin D synthase OS=Mus musculus GN=Hpgds PE=1 SV=3	NA	NA	NA	514.587	NA	569.452	NA	NA	NA	NA	609.591	714.237	NA	NA	672.453	NA	NA	NA	NA	460.49	NA	NA	NA	NA
F8VPK5	Rock2	Rho-associated protein kinase OS=Mus musculus GN=Rock2 PE=1 SV=1	597.315	564.515	594.946	568.894	591.253	620.708	597.103	592.673	576.866	632.656	587.218	557.779	519.256	543.981	580.402	603.685	556.191	601.034	619.915	604.774	605.037	589.912	604.71	599.169
P61164	Actr1a	Alpha-centractin OS=Mus musculus GN=Actr1a PE=1 SV=1	645.692	659.166	662.004	627.481	607.496	668.751	670.113	651.431	635.325	634.217	658.765	624.866	638.67	611.414	639.602	609.551	616.592	624.9	686.13	665.884	666.813	662.528	706.933	659.61
P56391	Cox6b1	Cytochrome c oxidase subunit 6B1 OS=Mus musculus GN=Cox6b1 PE=1 SV=2	601.078	543.458	566.018	548.339	529.403	566.118	594.017	599.899	616.193	624.509	571.469	550.97	519.046	609.529	627.709	580.502	549.665	586.645	584.655	625.879	593.311	571.108	568.84	566.667
P28571-1	Slc6a9	Isoform GlyT-1A of Sodium- and chloride-dependent glycine transporter 1 OS=Mus musculus GN=Slc6a9	617.264	610.909	583.531	569.655	581.965	544.283	665.164	614.279	674.567	610.237	712.27	622.851	589.575	630.256	651.816	705.575	601.244	621.86	498.775	603.242	650.663	721.481	577.304	484.336
A0A0A0MQE5	Camsap1	Calmodulin-regulated spectrin-associated protein 1 OS=Mus musculus GN=Camsap1 PE=1 SV=1	601.31	589.295	518.551	609.155	540.459	591.204	638.957	642.595	614.59	632.09	641.024	650.297	781.093	570.644	664.137	597.577	661.728	644.394	642.911	634.828	573.152	667.624	600.789	673.248
Q91VJ5	Pqbp1	Polyglutamine-binding protein 1 OS=Mus musculus GN=Pqbp1 PE=1 SV=1	549.164	512.639	410.142	595.906	530.709	595.404	614.49	914.576	674.761	622.656	694.348	571.805	951.964	714.242	629.908	626.262	825.79	638.129	574.532	656.783	658.623	591.839	588.021	759.551
Q8BHC1	Rab39b	Ras-related protein Rab-39B OS=Mus musculus GN=Rab39b PE=1 SV=1	642.936	619.967	647.344	651.125	649.042	595.77	526.049	594.406	542.105	563.14	561.762	619.384	608.208	563.386	574.451	542.772	604.002	539.537	619.435	631.255	589.775	546.472	573.795	685.733
Q91VF2	Hnmt	Histamine N-methyltransferase OS=Mus musculus GN=Hnmt PE=1 SV=1	606.561	601.493	606.616	524.884	607.474	609.47	609.867	608.502	647.693	623.746	603.934	633.705	741.602	676.852	672.362	663.785	658.068	661.686	565.668	597.974	652.855	619.049	652.294	616.538
P35762	Cd81	CD81 antigen OS=Mus musculus GN=Cd81 PE=1 SV=2	695.056	654.989	669.583	611.663	644.872	601.666	552.792	584.048	599.181	592.434	606.663	594.784	622.182	679.81	554.745	616.44	673.345	633.343	617.924	594.239	607.332	627.852	639.202	676.471
P55258	Rab8a	Ras-related protein Rab-8A OS=Mus musculus GN=Rab8a PE=1 SV=2	627.94	651.093	625.88	651.505	612.113	602.649	555.429	608.811	518.137	561.427	572.557	618.177	572.549	557.417	567.804	549.246	575.821	508.364	619.05	604.365	581.284	559.832	584.205	619.987
P35980	Rpl18	60S ribosomal protein L18 OS=Mus musculus GN=Rpl18 PE=1 SV=3	633.417	660.063	630.481	612.396	585.08	634.57	585.14	605.189	531.186	567.46	541.24	600.892	561.465	538.48	550.97	559.586	562.836	516.058	628.125	589.067	583.42	565.607	560.869	636.35
Q3UMR5	Mcu	Calcium uniporter protein, mitochondrial OS=Mus musculus GN=Mcu PE=1 SV=2	545.439	578.488	588.375	595.117	565.437	576.216	595.949	604.384	608.703	652.41	619.947	671.095	636.426	592.906	565.967	588.389	599.171	601.143	615.46	625.023	569.393	574.49	608.466	667.03
Q9JK81	Myg1	UPF0160 protein MYG1, mitochondrial OS=Mus musculus GN=Myg1 PE=1 SV=1	619.783	599.973	608.981	509.179	467.937	607.433	555.651	667.388	704.974	618.066	607.112	704.286	616.811	774.631	679.628	721.764	740.819	727.553	591.507	554.322	625.452	540.18	566.705	659.065
Q9QXS1-8	Plec	Isoform PLEC-0,1C,2A,3A of Plectin OS=Mus musculus GN=Plec	608.967	598.459	614.556	595.899	614.122	611.05	632.629	612.335	630.779	612.187	619.862	624.75	612.228	617.519	585.362	596.98	599.134	626.851	641.096	624.131	637.027	637.279	633.781	636.683
Q9D819	Ppa1	Inorganic pyrophosphatase OS=Mus musculus GN=Ppa1 PE=1 SV=1	593.451	600.95	595.319	565.5	581.321	566.09	604.447	606.368	634.447	639.126	634.829	674.393	674.992	646.84	598.096	605.884	619.246	642.375	617.048	603.978	634.804	613.132	608.427	600.146
A2AWI7	Sh3glb2	Endophilin-B2 OS=Mus musculus GN=Sh3glb2 PE=1 SV=1	637.231	645.912	649.964	611.696	643.42	672.914	646.048	588.337	597.552	589.543	620.823	521.704	568.331	602.324	639.26	609.82	577.441	605.174	614.344	612.654	608.283	597.134	643.647	605.187
Q9QZA0	Ca5b	Carbonic anhydrase 5B, mitochondrial OS=Mus musculus GN=Ca5b PE=1 SV=2	483.922	553.817	655.74	572.968	589.535	569.265	612.062	560.713	697.459	528.786	597.886	589.747	674.572	732.987	717.56	712.595	662.538	703.97	630.731	581.447	521.361	560.38	614.252	523.357
F6WMY5	Adgrl3	Adhesion G protein-coupled receptor L3 (Fragment) OS=Mus musculus GN=Adgrl3 PE=1 SV=1	626.939	649.611	617.25	652.807	606.443	571.795	611.044	625.686	643.382	606.124	577.933	653.002	589.147	595.617	594.796	595.24	616.023	587.179	622.439	565.68	622.011	610.31	627.162	608.85
Q9CQH3	Ndufb5	NADH dehydrogenase [ubiquinone] 1 beta subcomplex subunit 5, mitochondrial OS=Mus musculus GN=Ndufb5 PE=1 SV=1	617.751	610.591	641.757	572.265	595.069	620.78	582.189	580.342	580.853	571.167	665.115	591.144	550.678	566.299	533.827	544.038	527.931	589.953	633.218	606.791	595.884	600.158	600.088	602
Q9EQF6	Dpysl5	Dihydropyrimidinase-related protein 5 OS=Mus musculus GN=Dpysl5 PE=1 SV=1	622.753	620.308	590.051	589.874	599.081	585.27	606.706	605.554	584.459	560.767	587.009	638.494	611.814	610.152	596.5	531.557	579.098	582.618	578.913	610.335	563.939	595.628	613.99	568.106
Q920M7	Syt17	Synaptotagmin-17 OS=Mus musculus GN=Syt17 PE=1 SV=1	643.686	662.264	641.081	656.173	581.59	729.995	575.411	611.017	562.63	564.245	577.409	615.998	546.044	564.649	595.742	605.969	574.389	537.796	603.42	543.805	606.487	562.672	679.584	659.323
Q8CGS6	Polq	DNA polymerase theta OS=Mus musculus GN=Polq PE=1 SV=2	598.306	NA	606.384	NA	720.023	630.094	NA	642.751	595.55	719.722	NA	649.133	701.557	706.973	731.849	702.73	707.533	NA	NA	NA	690.838	NA	663.267	632.952
Q642K5	Fau	40S ribosomal protein S30 OS=Mus musculus GN=Fau PE=1 SV=1	605.839	526.162	570.08	543.525	529.889	545.305	657.214	628.822	673.434	584.045	565.508	559.16	591.439	676.026	603.003	509.826	592.557	683.395	630.594	576.046	586.037	548.497	522.571	334.849
Q00623	Apoa1	Apolipoprotein A-I OS=Mus musculus GN=Apoa1 PE=1 SV=2	654.941	679.067	612.825	543.07	737.395	622.648	781.284	619.51	678.491	463.184	528.021	555.606	589.803	492.086	590.717	482.073	496.239	623.514	622.556	653.551	607.171	744.026	639.297	560.276
Q8VEH3	Arl8a	ADP-ribosylation factor-like protein 8A OS=Mus musculus GN=Arl8a PE=1 SV=1	606.684	590.331	600.061	593.095	627.166	571.369	547.991	591.007	595.981	627.208	596.871	740.642	624.449	613.023	521.821	577.298	566.239	535.512	666.69	595.495	581.199	586.256	593.484	629.753
A0A0A0MQA3	Serpina1a	Alpha-1-antitrypsin 1-1 OS=Mus musculus GN=Serpina1a PE=1 SV=1	612.53	692.566	621.819	601.712	652.186	629.158	811.118	715.574	842.489	619.611	663.702	470.06	507.179	702.725	714.846	523.715	626.767	673.561	665.583	774.35	731.711	758.915	588.199	640.838
Q8BS72	Ctnna2	Catenin (Cadherin associated protein), alpha 2, isoform CRA_c OS=Mus musculus GN=Ctnna2 PE=1 SV=1	650.786	667.837	674.937	596.503	678.194	618.567	648.741	617.571	609.441	641.561	614.739	562.67	596.521	544.3	565.109	596.348	627.895	618.101	622.451	617.756	627.849	614.204	616.802	625.054
Q9CPU0	Glo1	Lactoylglutathione lyase OS=Mus musculus GN=Glo1 PE=1 SV=3	590.069	572.292	597.63	529.29	621.151	637.121	655.8	641.064	583.586	609.621	601.225	593.975	651.952	607.57	662.599	674.636	660.716	596.845	595.088	618.325	648.115	647.979	635.937	587.17
Q9CZD3	Gars	Glycine--tRNA ligase OS=Mus musculus GN=Gars PE=1 SV=1	583.466	582.106	590.017	563.82	599.071	583.427	604.375	594.931	621.311	611.256	613.324	610.848	661.651	611.591	627.192	624.538	612.108	615.357	575.644	595.283	619.976	629.191	624.029	572.188
Q8R3V5-3	Sh3glb2	Isoform 3 of Endophilin-B2 OS=Mus musculus GN=Sh3glb2	634.029	642.992	650.277	613.16	641.893	670.922	641.743	590.114	597.119	591.544	624.936	532.247	575.214	603.417	641.606	607.021	581.187	608.815	614.218	612.432	606.534	597.333	643.513	610.013
F8WIJ5	Ddhd1	Phospholipase DDHD1 OS=Mus musculus GN=Ddhd1 PE=1 SV=1	593.186	616.106	580.632	627.209	705.346	647.103	640.724	668.022	597.23	618.796	607.862	655.433	642.351	578.369	637.751	581.903	607.554	597.367	655.504	643.874	674.212	588.455	637.699	574.709
P23591	Tsta3	GDP-L-fucose synthase OS=Mus musculus GN=Tsta3 PE=1 SV=3	595.924	626.88	696.842	584.637	652.572	583.804	590.628	633.322	627.385	577.306	537.419	631.665	730.043	646.372	606.717	617.058	715.29	588.243	593.848	649.348	608.672	597.982	614.953	681.279
Q6P3D0	Nudt16	U8 snoRNA-decapping enzyme OS=Mus musculus GN=Nudt16 PE=1 SV=1	585.03	654.175	645.347	532.61	609.422	584.118	585.756	577.28	581.463	543.154	541.196	647.287	697.159	644.182	609.775	599.508	622.301	667.026	598.187	608.304	597.559	614.286	624.053	571.148
Q99JP7	Ggt7	Gamma-glutamyltransferase 7 OS=Mus musculus GN=Ggt7 PE=1 SV=2	628.128	650.132	671.705	565.843	655.548	638.864	546.397	593.828	603.808	605.47	589.5	554.94	688.444	649.993	612.819	640.315	622.054	667.362	645.874	569.853	572.025	600.079	584.277	614.647
E9QMV2	Abracl	Costars family protein ABRACL OS=Mus musculus GN=Abracl PE=1 SV=1	671.299	788.416	658.142	674.415	586.805	693.088	655.198	607.671	633.552	480.704	494.879	412.488	504.71	532.647	514.544	439.346	642.311	520.908	711.583	626.733	561.763	629.975	703.863	748.265
Q4VBE8	Wdr18	WD repeat-containing protein 18 OS=Mus musculus GN=Wdr18 PE=1 SV=1	640.536	701.713	652.258	773.399	712.97	656.053	561.602	532.548	563.39	558.718	572.846	580.159	616.493	616.15	522.358	559.46	589.445	538.954	634.532	666.735	567.747	587.375	585.631	651.187
P34928	Apoc1	Apolipoprotein C-I OS=Mus musculus GN=Apoc1 PE=1 SV=1	589.919	NA	NA	600.206	NA	NA	NA	873.902	NA	NA	329.418	NA	616.459	NA	NA	NA	899.81	NA	NA	562.428	NA	NA	NA	579.004
Q8R016	Blmh	Bleomycin hydrolase OS=Mus musculus GN=Blmh PE=1 SV=1	630.501	634.721	610.548	582.566	590.315	615.695	627.315	613.505	645.266	614.211	606.803	617.101	680.993	648.007	634.176	636.371	633.979	623.372	594.225	614.818	653.628	597.844	607.509	607.906
E9Q8P8	Fam131b	Protein FAM131B OS=Mus musculus GN=Fam131b PE=1 SV=1	650.191	585.682	672.789	613.56	675.32	627.029	504.705	549.598	562.299	597.759	557.45	590.517	717.007	666.015	536.987	588.994	621.13	566.359	630.994	642.418	582.112	585.708	558.709	655.364
Q9CXJ1	Ears2	Probable glutamate--tRNA ligase, mitochondrial OS=Mus musculus GN=Ears2 PE=1 SV=1	531.291	933.817	543.621	NA	628.171	681.724	507.15	620.456	NA	675.045	NA	699.343	458.115	NA	650.128	583.748	514.953	570.917	542.063	NA	610.262	523.807	NA	548.736
Q6IRU5-2	Cltb	Isoform 2 of Clathrin light chain B OS=Mus musculus GN=Cltb	641.175	559.118	676.325	578.373	649.587	648.606	556.336	557.522	550.916	571.083	540.702	501.12	396.913	525.536	466.806	596.977	474.649	567.402	573.029	624.369	604.458	554.041	601.205	545.116
Q9WTP6	Ak2	Adenylate kinase 2, mitochondrial OS=Mus musculus GN=Ak2 PE=1 SV=5	606.155	596.687	610.508	593.114	576.225	629.968	648.007	616.676	665.22	619.574	521.987	515.897	486.683	583.84	570.045	619.264	531.916	625.179	576.332	629.954	611.042	633.289	634.16	616.464
A2A432	Cul4b	Cullin-4B OS=Mus musculus GN=Cul4b PE=1 SV=1	638.518	722.583	684.821	657.169	684.763	680.926	619.272	583.252	560.35	555.724	551.958	522.73	397.932	464.565	609.633	554.242	464.09	476.013	571.395	665.061	601.887	535.216	658.033	619.094
Q2NL51	Gsk3a	Glycogen synthase kinase-3 alpha OS=Mus musculus GN=Gsk3a PE=1 SV=2	629.837	607.967	621.93	573.729	592.575	609.273	591.204	588.314	588.555	604.987	588.121	674.383	649.033	626.252	586.978	598.574	622.936	624.155	612.089	604.489	601.121	579.628	612.07	606.251
Q60972	Rbbp4	Histone-binding protein RBBP4 OS=Mus musculus GN=Rbbp4 PE=1 SV=5	618.706	622.002	611.527	564.082	579.546	605.51	610.135	623.857	650.492	610.604	619.364	649.048	647.636	630.651	625.083	609.176	622.996	668.585	612.391	594.443	597.808	632.224	630.392	611.162
Q149L6	Dnajb14	DnaJ homolog subfamily B member 14 OS=Mus musculus GN=Dnajb14 PE=2 SV=1	613.562	631.294	545.021	674.435	585.205	719.29	607.036	694.658	373.281	679.807	614.649	579.526	521.283	245.504	551.239	600.107	539.967	513.639	565.157	631.792	627.008	595.933	807.834	633.587
Q3UM45	Ppp1r7	Protein phosphatase 1 regulatory subunit 7 OS=Mus musculus GN=Ppp1r7 PE=1 SV=2	595.067	585.696	584.597	571.793	597.148	563.25	610.068	622.102	631.626	636.411	615.677	664.931	657.102	654.229	625.33	650.956	639.159	636.302	616.633	618.735	639.296	594.26	575.256	605.765
Q80T79	Csmd3	CUB and sushi domain-containing protein 3 OS=Mus musculus GN=Csmd3 PE=1 SV=3	NA	NA	503.047	564.086	515.634	557.217	NA	NA	683.587	675.757	611.993	609.578	NA	776.016	600.548	748.757	NA	NA	NA	587.385	532.267	NA	544.51	NA
Q8BWM0	Ptges2	Prostaglandin E synthase 2 OS=Mus musculus GN=Ptges2 PE=1 SV=3	651.577	673.887	697.907	609.045	659.21	617.81	653.978	626.786	578.398	625.429	570.169	601.7	665.869	583.552	580.636	603.219	644.412	576.663	601.519	623.025	638.441	621.675	639.756	705.252
Q9D1G1	Rab1b	Ras-related protein Rab-1B OS=Mus musculus GN=Rab1b PE=1 SV=1	653.802	645.129	637.487	661.644	624.122	624.225	569.331	602.626	541.667	548.286	557.609	578.929	602.119	561.32	564.96	527.93	591.309	546.289	616.764	603.492	574.357	567.453	610.534	679.473
Q9ERS2	Ndufa13	NADH dehydrogenase [ubiquinone] 1 alpha subcomplex subunit 13 OS=Mus musculus GN=Ndufa13 PE=1 SV=3	602.576	595.335	591.953	553.412	606.44	581.621	619.86	627.217	639.224	627.165	662.358	668.054	655.795	655.917	633.862	595.232	587.531	633.282	699.841	650.464	633.275	628.34	588.241	614.465
O08795-2	Prkcsh	Isoform 2 of Glucosidase 2 subunit beta OS=Mus musculus GN=Prkcsh	601.63	594.153	617.679	623.494	620.37	616.269	658.346	640.065	586.781	619.583	672.567	555.076	553.859	517.976	604.227	569.055	551.444	558.433	608.355	655.985	626.117	583.681	637.387	586.226
Q9CZU6	Cs	Citrate synthase, mitochondrial OS=Mus musculus GN=Cs PE=1 SV=1	591.585	595.042	636.139	621.047	608.155	604.636	623.039	622.681	585.212	611.507	609.818	579.084	558.028	590.63	619.756	586.792	573.398	590.304	643.488	634.304	616.295	593.311	613.917	609.703
P61961	Ufm1	Ubiquitin-fold modifier 1 OS=Mus musculus GN=Ufm1 PE=1 SV=1	580.576	589.767	541.051	631.581	548.658	583.719	606.906	633.141	582.814	603.383	639.122	770.037	693.35	794.686	609.668	565.533	616.872	620.795	678.993	661.866	606.382	633.883	741.652	640.916
P53798	Fdft1	Squalene synthase OS=Mus musculus GN=Fdft1 PE=1 SV=2	513.682	429.557	564.234	676.571	462.339	542.063	516.134	610.31	681.615	749.802	682.564	972.235	600.428	602.079	621.98	582.405	612.566	545.985	531.576	632.961	641.482	577.665	678.33	603.802
Q9DBE8	Alg2	Alpha-1,3/1,6-mannosyltransferase ALG2 OS=Mus musculus GN=Alg2 PE=1 SV=2	666.564	696.038	632.448	668.346	635.473	688.594	605.47	570.331	554.203	554.448	549.001	557.653	519.068	578.132	575.513	572.28	549.073	552.96	614.066	601.538	561.141	613.236	639.906	641.106
Q80ZD8	Amigo1	Amphoterin-induced protein 1 OS=Mus musculus GN=Amigo1 PE=1 SV=1	639.836	635.373	550.588	628.14	525.502	611.633	580.115	560.076	614.575	604.379	637.191	630.981	670.821	743.073	658.705	573.498	640.321	632.61	646.549	625.705	625.425	597.031	569.254	596.674
Q3UDE2	Ttll12	Tubulin--tyrosine ligase-like protein 12 OS=Mus musculus GN=Ttll12 PE=1 SV=1	659.918	672.357	683.824	663.292	702.66	632.725	660.78	660.252	677.05	684.929	689.219	699.594	658.551	703.776	692.624	652.313	663.576	641.685	691.851	699.588	664.053	635.796	645.721	690.639
A2ALV3	Sh3gl2	Endophilin-A1 OS=Mus musculus GN=Sh3gl2 PE=1 SV=1	604.085	570.925	604.688	621.354	623.65	613.229	628.855	626.665	622.022	611.53	627.003	606.4	628.824	599.566	615.436	634.779	613.62	638.492	633.142	628.597	625.82	610.583	635.999	638.292
Q91ZJ0	Mus81	Crossover junction endonuclease MUS81 OS=Mus musculus GN=Mus81 PE=1 SV=2	NA	NA	648.633	661.569	689.624	608.099	NA	NA	NA	555.688	504.884	573.932	NA	NA	587.782	521.963	NA	NA	NA	600.69	555.67	NA	NA	NA
Q6ZPJ3	Ube2o	(E3-independent) E2 ubiquitin-conjugating enzyme UBE2O OS=Mus musculus GN=Ube2o PE=1 SV=3	626.941	612.823	601.31	600.922	584.305	603.978	646.218	631.362	570.993	599.174	579.975	602.24	532.504	537.375	587.631	604.396	590.081	596.987	603.873	568.932	591.285	602.836	607.778	610.907
Q8C2Q3	Rbm14	RNA-binding protein 14 OS=Mus musculus GN=Rbm14 PE=1 SV=1	600.394	600.565	597.298	607.908	620.134	585.015	641.316	667.023	657.347	636.741	646.295	547.76	588.74	590.577	610.306	608.136	572.313	622.799	581.572	684.472	642.063	637.349	653.69	618.533
Q8R3V5	Sh3glb2	Endophilin-B2 OS=Mus musculus GN=Sh3glb2 PE=1 SV=2	635.829	642.275	651.923	611.696	643.624	672.914	641.661	587.446	595.641	589.595	620.823	521.704	567.655	603.14	639.26	607.37	576.492	606.197	613.089	612.654	606.523	595.907	643.797	608.377
Q8BKZ9	Pdhx	Pyruvate dehydrogenase protein X component, mitochondrial OS=Mus musculus GN=Pdhx PE=1 SV=1	545.07	561.729	581.888	567.992	547.511	578.068	654.346	621.489	648	635.602	657.226	662.968	660.665	646.635	632.196	601.568	599.381	676.307	659.009	626.403	654.567	616.616	606.387	551.652
P58501	Paxbp1	PAX3- and PAX7-binding protein 1 OS=Mus musculus GN=Paxbp1 PE=1 SV=3	NA	797.634	NA	637.113	NA	NA	874.488	NA	NA	NA	635.345	NA	NA	NA	NA	NA	NA	814.16	690.021	593.465	NA	1496.62	NA	NA
Q9D6K5	Synj2bp	Synaptojanin-2-binding protein OS=Mus musculus GN=Synj2bp PE=1 SV=1	529.436	515.109	613.225	524.703	551.197	512.53	600.947	557.37	664.476	675.492	548.325	825.951	693.047	673.421	669.681	640.669	632.349	633.847	617.056	638.973	656.335	614.536	538.939	642.056
Q8BZA9	Tigar	Fructose-2,6-bisphosphatase TIGAR OS=Mus musculus GN=Tigar PE=1 SV=1	407.153	486.418	653.599	638.948	631.067	619.102	534.538	710.386	641.252	715.454	574.451	581.707	647.028	764.648	717.821	718.376	750.42	730.549	601.292	472.548	732.455	580.812	716.439	613.27
P16045	Lgals1	Galectin-1 OS=Mus musculus GN=Lgals1 PE=1 SV=3	618.792	596.511	594.021	635.595	662.975	602.878	537.877	630.415	650.57	638.986	580.046	713.892	529.866	584.443	528.35	586.868	562.246	538.08	582.679	668.514	646.7	570.368	721.85	746.736
P14148	Rpl7	60S ribosomal protein L7 OS=Mus musculus GN=Rpl7 PE=1 SV=2	622.196	629.742	649.397	649.618	623.942	633.788	633.366	630.078	591.155	600.069	567.559	527.388	544.589	533.627	635.958	574.785	561.906	524.109	598.639	629.067	610.568	569.733	605.456	588.231
Q3U1V8	Map3k9	Mitogen-activated protein kinase kinase kinase 9 OS=Mus musculus GN=Map3k9 PE=2 SV=2	638.09	NA	650.391	NA	629.561	691.706	NA	583.92	611.71	621.381	NA	773.003	561.044	574.852	721.295	629.326	610.134	NA	NA	NA	649.722	NA	534.162	506.497
Q8BGY2	Eif5a2	Eukaryotic translation initiation factor 5A-2 OS=Mus musculus GN=Eif5a2 PE=1 SV=3	655.528	699.644	666.825	667.209	611.783	622.335	573.285	586.803	513.774	553.273	574.707	584.691	569.136	575.412	570.867	559.737	575.009	544.953	638.073	647.253	564.698	562.394	605.851	633.934
Q9JIM1	Slc29a1	Equilibrative nucleoside transporter 1 OS=Mus musculus GN=Slc29a1 PE=1 SV=3	621.083	566.351	475.648	667.814	565.15	625.937	579.259	636.939	682.032	458.322	669.001	709.505	674.288	741.716	724.901	564.939	603.414	605.677	557.212	555.318	539.767	552.207	555.452	454.672
Q3UYH7	Adrbk2	Beta-adrenergic receptor kinase 2 OS=Mus musculus GN=Adrbk2 PE=1 SV=2	633.384	593.694	601.958	584.564	570.588	558.815	523.137	576.841	635.149	569.515	608.73	627.241	710.483	683.757	595.085	570.91	683.359	619.224	589.758	570.036	569.037	585.945	608.592	651.022
E9Q1W7	Tbck	TBC domain-containing protein kinase-like protein OS=Mus musculus GN=Tbck PE=1 SV=1	669.753	645.596	627.991	591.701	590.292	585.98	625.731	615.266	598.414	635.446	592.794	635.527	492.489	606.518	622.801	608.835	530.095	602.249	607.75	550.758	581.742	594.701	644.751	616.453
Q6DFW4	Nop58	Nucleolar protein 58 OS=Mus musculus GN=Nop58 PE=1 SV=1	608.054	565.048	623.13	708.698	633.621	648.011	552.723	571.143	670.026	662.031	759.41	765.198	605.59	648.831	611.589	609.346	625.357	576.291	566.631	685.903	648.174	624.356	620.746	566.852
E9Q3C1	C2cd2	C2 domain-containing protein 2 OS=Mus musculus GN=C2cd2 PE=2 SV=1	NA	530.088	NA	557.552	NA	NA	759.703	NA	NA	NA	693.306	NA	NA	NA	NA	NA	NA	635.798	602.708	588.823	NA	707.484	NA	NA
Q8BNE1	Tcaf1	TRPM8 channel-associated factor 1 OS=Mus musculus GN=Tcaf1 PE=2 SV=1	695.116	NA	643.567	615.268	635.294	645.518	NA	630.679	NA	570.053	562.565	623.714	578.285	NA	530.373	438.575	645.614	NA	NA	567.37	543.161	NA	NA	826.035
Q61730-3	Il1rap	Isoform 3 of Interleukin-1 receptor accessory protein OS=Mus musculus GN=Il1rap	646.525	597.939	588.681	659.836	570.941	649.712	587.286	603.339	634.786	596.822	660.231	588.621	645.116	724.999	704.419	633.798	657.14	626.998	659.551	690.88	622.256	606.491	569.696	565.996
Q8C570	Rae1	mRNA export factor OS=Mus musculus GN=Rae1 PE=1 SV=1	639.333	580.189	634.163	577.903	598.539	595.227	531.301	611.923	602.537	636.744	562.486	634.192	714.29	658.78	598.88	646.764	715.112	598.07	548.393	557.964	597.631	600.657	591.597	674.451
Q8VIM9	Irgq	Immunity-related GTPase family Q protein OS=Mus musculus GN=Irgq PE=1 SV=1	546.949	545.019	565.399	549.095	561.917	625.542	598.222	582.024	558.094	598.465	643.076	683.31	701.054	677.586	665.438	587.736	631.652	631.075	594.155	738.965	592.394	650.71	536.41	536.431
Q9D1Q4	Dpm3	Dolichol-phosphate mannosyltransferase subunit 3 OS=Mus musculus GN=Dpm3 PE=1 SV=1	NA	NA	659.591	NA	652.702	NA	NA	NA	614.424	631.203	NA	NA	NA	468.799	NA	508.153	NA	NA	NA	NA	573.959	NA	760.772	NA
Q9DB72	Btbd17	BTB/POZ domain-containing protein 17 OS=Mus musculus GN=Btbd17 PE=1 SV=1	711.929	725.642	683.13	658.472	719.986	643.84	689.979	663.305	576.933	586.967	545.215	570.893	574.276	591.812	624.67	645.161	583.774	607.459	641.146	654.134	602.93	598.523	672.772	651.959
Q810I0	Vps37d	Vacuolar protein sorting-associated protein 37D OS=Mus musculus GN=Vps37d PE=2 SV=2	655.622	NA	NA	NA	NA	581.006	NA	619.169	NA	NA	NA	889.359	716.752	NA	749.701	NA	649.277	NA	NA	NA	NA	NA	NA	615.94
A0A1B0GS41	Gab1	GRB2-associated-binding protein 1 OS=Mus musculus GN=Gab1 PE=1 SV=1	670.647	579.849	595.588	598.748	588.768	629.945	705.499	604.209	617.594	663.486	657.003	606.259	715.386	619.34	649.277	727.05	745.564	697.84	635.199	716.67	605.439	685.161	598.829	674.293
E9QKI4	Akt1s1	Proline-rich AKT1 substrate 1 OS=Mus musculus GN=Akt1s1 PE=1 SV=1	675.294	597.907	740.081	632.501	744.009	751.288	660.578	544.112	446.356	567.696	482.326	272.303	330.314	305.712	563.805	503.966	428.931	489.393	553.153	649.162	630.293	529.955	664.03	632.647
P63037	Dnaja1	DnaJ homolog subfamily A member 1 OS=Mus musculus GN=Dnaja1 PE=1 SV=1	605.125	628.524	616.69	618.107	591.82	588.113	593.3	604.021	635.425	644.158	625.413	669.205	564.754	635.99	551.578	602.358	559.192	614.783	634.211	612.372	603.408	625.892	603.314	619.51
P60487	Pdxp	Pyridoxal phosphate phosphatase OS=Mus musculus GN=Pdxp PE=1 SV=1	663.725	618.061	616.286	673.273	650.493	680.833	528.801	628.726	552.457	585.772	564.235	626.314	697.792	635.276	615.6	582.987	670.047	578.488	626.992	655.654	620.819	545.76	592.413	654.872
P28271	Aco1	Cytoplasmic aconitate hydratase OS=Mus musculus GN=Aco1 PE=1 SV=3	611.619	582.586	599.453	567.1	582.184	601.585	606.36	611.882	627.047	621.918	622.573	592.806	618.616	630.703	603.456	607.069	614.605	597.829	597.474	595.627	611.106	604.971	600.677	585.465
Q91VD9	Ndufs1	NADH-ubiquinone oxidoreductase 75 kDa subunit, mitochondrial OS=Mus musculus GN=Ndufs1 PE=1 SV=2	604.342	598.037	590.966	580.192	598.284	584.09	608.139	627.995	637.689	626.613	650.738	658.289	602.182	624.837	616.766	596.734	600.955	631.844	659.965	652.063	622.011	627.088	609.138	616.399
Q9EQT6	Syt13	Synaptotagmin-13 OS=Mus musculus GN=Syt13 PE=1 SV=1	NA	800.421	NA	741.295	NA	642.115	575.018	NA	565.269	NA	614.92	713.517	NA	695.089	661.026	NA	NA	532.613	517.819	600.762	NA	586.634	523.095	NA
Q7TQI3	Otub1	Ubiquitin thioesterase OTUB1 OS=Mus musculus GN=Otub1 PE=1 SV=2	653.356	680.811	673.924	618.057	636.737	633.519	587.244	566.159	551.103	574.948	562.048	673.096	599.591	619.198	563.51	570.224	600.699	573.812	677.003	620.584	552.702	567.615	604.289	664.783
Q8R1I1	Uqcr10	Cytochrome b-c1 complex subunit 9 OS=Mus musculus GN=Uqcr10 PE=1 SV=1	597.543	726.236	556.489	662.575	621.268	519.537	571.958	685.379	572.435	587.364	608.675	713.366	517.716	528.517	535.371	607.199	648.152	506.978	531.718	549.826	605.565	513.704	571.393	663.147
Q14BB9	Map6d1	MAP6 domain-containing protein 1 OS=Mus musculus GN=Map6d1 PE=1 SV=1	614.342	657.14	589.155	618.143	620.884	650.71	706.446	608.604	651.232	606.986	611.164	582.26	618.502	662.951	605.183	652.611	651.16	722.463	671.066	627.687	645.419	651.059	656.034	686.025
Q9Z127	Slc7a5	Large neutral amino acids transporter small subunit 1 OS=Mus musculus GN=Slc7a5 PE=1 SV=2	701.682	662.194	844.865	NA	772.28	NA	696.494	694.411	484.913	553.699	NA	NA	284.452	131.066	NA	455.561	430.721	568.027	490.653	NA	619.856	560.049	761.762	705.823
Q6DVA0	Lemd2	LEM domain-containing protein 2 OS=Mus musculus GN=Lemd2 PE=1 SV=1	NA	NA	NA	691.546	NA	661.029	NA	NA	NA	NA	665.508	713.04	NA	NA	517.993	NA	NA	NA	NA	573.731	NA	NA	NA	NA
Q9CQF0	Mrpl11	39S ribosomal protein L11, mitochondrial OS=Mus musculus GN=Mrpl11 PE=1 SV=1	655.259	681.259	633.179	625.51	610.701	632.324	634.836	633.036	646.015	598.218	611.385	609.083	666.284	607.51	622.007	681.06	612.983	654.112	607.007	597.319	623.647	632.756	654.363	617.688
P52760	Hrsp12	Ribonuclease UK114 OS=Mus musculus GN=Hrsp12 PE=1 SV=3	713.553	634.171	669.325	628.843	619.99	682.435	566.9	590.615	561.98	512.754	555.865	544.907	651.633	603.27	576.594	531.308	582.678	519.386	652.37	628.308	621.508	596.941	653.345	695.191
P35123	Usp4	Ubiquitin carboxyl-terminal hydrolase 4 OS=Mus musculus GN=Usp4 PE=1 SV=3	651.094	649.965	669.665	590.535	640.926	624.218	588.783	589.574	563.171	567.021	557.462	583.048	597.223	575.459	586.012	523.11	586.816	575.686	604.984	596.132	529.278	582.442	634.058	687.856
Q08331	Calb2	Calretinin OS=Mus musculus GN=Calb2 PE=1 SV=3	689.373	655.497	684.191	557.904	624.677	617.389	627.399	631.78	591.951	530.429	597.63	561.224	553.263	609.424	587.238	516.857	625.421	625.536	571.684	604.426	547.052	656.166	599.121	638.409
Q9D1M4	Eef1e1	Eukaryotic translation elongation factor 1 epsilon-1 OS=Mus musculus GN=Eef1e1 PE=1 SV=1	731.803	717.208	672.796	858.98	686.363	802.969	630.262	609.259	502.317	541.379	512.396	351.136	297.709	414.835	506.563	480.709	405.456	396.265	588.978	712.023	573.696	520.727	661.423	640.801
Q9DAM7	Tmem263	Transmembrane protein 263 OS=Mus musculus GN=Tmem263 PE=1 SV=1	591.441	742.78	584.297	645.338	572.197	533.289	582.962	584.954	529.709	577.952	474.271	630.838	524.352	482.719	557	576.81	526.184	480.066	574.207	469.412	549.361	442.568	505.019	652.284
P40336-2	Vps26a	Isoform 2 of Vacuolar protein sorting-associated protein 26A OS=Mus musculus GN=Vps26a	613.075	617.721	622.001	625.487	602.858	620.221	671.616	649.04	667.143	617.529	649.288	638.246	672.973	635.872	665.642	594.67	645.088	644.998	643.375	596.558	604.19	652.044	621.332	606.621
Q3TZZ7	Esyt2	Extended synaptotagmin-2 OS=Mus musculus GN=Esyt2 PE=1 SV=1	657.172	649.953	573.256	661.266	616.863	622.107	593.674	621.212	627.242	603.021	583.766	560.333	706.602	691.828	610.777	562.464	669.379	637.752	620.684	589.988	606.158	626.313	585.577	658.543
P58064	Mrps6	28S ribosomal protein S6, mitochondrial OS=Mus musculus GN=Mrps6 PE=1 SV=3	609.297	557.689	629.338	573.277	571.189	598.997	639.781	642.783	646.474	672.656	749.564	623.244	641.298	621.398	694.541	707.109	607.066	699.552	608.43	653.841	703.31	580.213	582.612	566.423
Q91Z25	Arpc1b	Actin-related protein 2/3 complex subunit 1B OS=Mus musculus GN=Arpc1b PE=1 SV=1	699.799	1100.12	523.637	649.268	578.9	612.161	670.587	602.818	525.961	601.528	474.454	701.951	595.363	636.719	557.696	634.462	586.695	533.915	810.801	550.192	619.118	536.322	621.615	847.952
P14152	Mdh1	Malate dehydrogenase, cytoplasmic OS=Mus musculus GN=Mdh1 PE=1 SV=3	697.644	675.546	746.904	626.234	710.122	715.474	592.979	587.31	561.666	531.535	538.122	526.305	560.241	583.416	563.641	522.707	567.204	557.97	644.397	629.648	573.826	563.593	617.659	656.609
D3YWB9	Cntnap4	Contactin-associated protein-like 4 OS=Mus musculus GN=Cntnap4 PE=1 SV=1	574.896	737.749	542.723	533.946	570.687	604.185	565.079	561.711	641.744	562.733	596.799	591.749	582.972	622.9	589.14	503.349	540.954	532.403	563.393	623.229	520.218	539.624	642.569	696.632
O08688	Capn5	Calpain-5 OS=Mus musculus GN=Capn5 PE=1 SV=1	609.833	643.266	597.805	636.408	602.704	591.154	603.543	589.705	570.183	600.843	623.992	614.704	612.225	549.581	576.197	621.055	629.368	612.178	610.963	607.085	588.658	579.848	600.288	672.868
O35887	Calu	Calumenin OS=Mus musculus GN=Calu PE=1 SV=1	672.655	692.432	741.311	596.294	750.96	708.886	589.004	586.533	578.234	500.903	503.926	439.829	444.511	500.241	589.864	470.17	479.813	508.897	563.467	576.315	467.371	552.16	647.953	659.758
P62715	Ppp2cb	Serine/threonine-protein phosphatase 2A catalytic subunit beta isoform OS=Mus musculus GN=Ppp2cb PE=1 SV=1	659.117	638.016	621.086	679.925	641.913	612.045	565.567	625.643	590.321	589.532	554.71	596.4	607.527	570.029	570.021	588.875	635.801	560.039	613.58	588.451	612.263	568.531	624.247	692.267
Q61001	Lama5	Laminin subunit alpha-5 OS=Mus musculus GN=Lama5 PE=1 SV=4	736.806	NA	NA	560.505	NA	508.72	NA	790.67	570.244	NA	666.367	723.872	223.642	620.257	557.469	NA	398.421	NA	NA	650.934	NA	NA	833.2	1056.42
Q5DQR4	Stxbp5l	Syntaxin-binding protein 5-like OS=Mus musculus GN=Stxbp5l PE=1 SV=1	650.269	674.921	692.52	687.462	669.068	681.123	735.342	639.814	599.079	641.194	681.266	529.101	456.403	523.615	625.865	618.063	534.647	618.627	703.115	672.173	671.283	614.487	681.436	572.151
P20357	Map2	Microtubule-associated protein 2 OS=Mus musculus GN=Map2 PE=1 SV=2	618.18	603.817	601.362	636.301	620.328	615.949	653.673	635.421	639.097	640.447	667.557	632.171	577.925	594.617	599.928	580.154	568.537	651.093	622.95	628.726	626.655	618.949	628.486	595.63
Q9CXJ4	Abcb8	ATP-binding cassette sub-family B member 8, mitochondrial OS=Mus musculus GN=Abcb8 PE=1 SV=1	618.334	634.159	606.466	580.16	641.016	589.864	719.126	676.441	681.604	673.741	630.462	525.514	617.653	562.677	651.194	756.786	630.349	720.158	687.943	650.468	695.257	706.877	668.699	634.892
A0A0R4J1Y3	Osgep	Probable tRNA N6-adenosine threonylcarbamoyltransferase OS=Mus musculus GN=Osgep PE=1 SV=1	613.361	610.031	597.498	617.67	548.869	614.712	600.174	503.588	713.845	617.3	608.978	615.568	645.212	729.887	661.25	688.473	675.032	633.003	591.155	645.5	626.186	618.27	527.655	568.711
Q62433	Ndrg1	Protein NDRG1 OS=Mus musculus GN=Ndrg1 PE=1 SV=1	583.054	550.761	596.056	573.348	574.397	630.976	643.14	596.356	660.445	620.574	643.568	513.578	597.11	639.094	623.524	670.11	646.865	690.517	599.063	685.065	646.182	661.999	629.595	520.749
B1AQZ0	2019-09-08	Septin-8 OS=Mus musculus GN=Sept8 PE=1 SV=1	610.497	623.517	608.743	642.1	673.465	608.968	688.699	660.772	635.872	629.349	697.17	664.863	611.946	627.838	631.473	616.166	622.092	624.446	685.105	688.029	658.82	631.663	695.686	594.937
Q9D881	Cox5b	Cytochrome c oxidase subunit 5B, mitochondrial OS=Mus musculus GN=Cox5b PE=1 SV=1	562.155	576.367	629.021	597.755	606.164	588.605	666.248	647.74	653.983	644.077	672.805	567.437	531.085	565.42	610.232	656.153	559.733	639.771	605.818	674.514	642.991	599.845	608.588	529.357
Q9QYF1	Rdh11	Retinol dehydrogenase 11 OS=Mus musculus GN=Rdh11 PE=1 SV=2	652.54	563.329	543.999	600.529	516.832	559.851	637.463	618.98	641.185	600.64	569.685	545.647	510.918	530.862	593.291	621.161	559.009	543.535	603.565	593.994	646.555	575.707	592.034	631.594
P08249	Mdh2	Malate dehydrogenase, mitochondrial OS=Mus musculus GN=Mdh2 PE=1 SV=3	562.332	569.493	586.786	574.562	574.873	574.285	604.331	603.627	638.417	646.924	644.235	677.527	647.687	691.355	625.188	604.626	596.832	664.682	683.886	628.664	628.375	621.734	611.997	598.146
Q8R2Y8	Ptrh2	Peptidyl-tRNA hydrolase 2, mitochondrial OS=Mus musculus GN=Ptrh2 PE=1 SV=1	594.598	769.103	608.057	565.599	578.643	565.373	614.003	599.653	557.108	526.782	559.87	719.37	436.023	508.539	596.793	498.055	437.81	434.682	533.153	603.344	607.417	538.014	676.336	736.369
P58021	Tm9sf2	Transmembrane 9 superfamily member 2 OS=Mus musculus GN=Tm9sf2 PE=1 SV=1	676.583	521.474	585.411	557.426	532.858	590.261	545.843	668.135	619.127	632.231	686.81	612.693	531.807	588.899	580.906	614.257	566.659	570.066	623.589	598.184	669.194	559.608	647.096	630.866
O35857	Timm44	Mitochondrial import inner membrane translocase subunit TIM44 OS=Mus musculus GN=Timm44 PE=1 SV=2	587.973	571.407	622.023	640.836	684.211	759.722	579.359	650.833	575.564	639.38	632.779	508.979	590.311	565.827	667.714	627.587	573.414	551.873	606.953	624.385	630.905	658.503	617.788	681.796
Q810C0	Slitrk2	SLIT and NTRK-like protein 2 OS=Mus musculus GN=Slitrk2 PE=1 SV=1	760.41	661.017	675.464	802.519	674.53	NA	575.447	623.675	631.753	605.456	613.984	NA	763.354	706.984	NA	653.51	772.915	595.234	603.894	667.958	667.457	571.813	622.062	589.543
Q80TY0	Fnbp1	Formin-binding protein 1 OS=Mus musculus GN=Fnbp1 PE=1 SV=2	617.272	601.419	628.607	538.614	622.703	584.128	633.732	621.623	590.588	599.499	622.786	529.174	502.937	530.378	564.9	618.747	549.343	584.973	616.858	650.525	663.935	613.658	650.21	573.491
Q80VP1-2	Epn1	Isoform 2 of Epsin-1 OS=Mus musculus GN=Epn1	591.23	569.335	595.449	567.592	601.779	612.795	657.626	639.472	645.932	655.037	628.244	596.566	581.89	565.871	606.635	661.469	596.103	665.347	606.884	626.618	641.219	606.36	633.376	598.083
Q8VH37	Hdac8	Histone deacetylase 8 OS=Mus musculus GN=Hdac8 PE=1 SV=2	601.147	618.136	NA	560.206	NA	566.83	540.643	500.23	594.086	NA	518.924	626.797	687.483	723.112	683.236	NA	652.925	611.368	546.673	569.235	NA	559.76	590.601	547.629
Q9DCN2	Cyb5r3	NADH-cytochrome b5 reductase 3 OS=Mus musculus GN=Cyb5r3 PE=1 SV=3	598.583	610.842	582.414	641.949	590.091	571.848	617.379	623.489	625.863	632.101	613.968	667.541	651.422	666.892	646.698	659.966	650.483	598.382	588.284	623.929	642.404	605.289	630.531	668.985
A0A087WNZ5	Ly6c1	Lymphocyte antigen 6C1 OS=Mus musculus GN=Ly6c1 PE=1 SV=1	618.601	626.781	579.724	673.198	486.509	527.685	607.234	614.993	619.053	676.105	667.45	637.363	697.88	785.874	633.419	657.287	733.457	714.772	564.16	642.65	699.787	590.206	575.621	564.175
Q8BHL5-2	Elmo2	Isoform 2 of Engulfment and cell motility protein 2 OS=Mus musculus GN=Elmo2	657.181	629.378	702.1	618.149	655.571	607.44	591.558	584.522	573.991	617.203	578.18	614.524	704.176	589.531	585.757	578.891	671.904	642.244	603.882	590.466	612.136	621.974	621.696	738.825
Q80TH2-2	Erbin	Isoform 2 of Erbin OS=Mus musculus GN=Erbin	595.28	570.002	567.936	585.803	596.568	617.336	600.732	588.052	592.908	612.34	609.566	606.762	732.776	639.208	667.542	679.884	629.446	539.462	582.504	600.706	588.301	546.638	558.499	608.546
Q9CRB8	Mtfp1	Mitochondrial fission process protein 1 OS=Mus musculus GN=Mtfp1 PE=1 SV=1	583.243	635.081	582.065	550.837	576.958	588.675	656.023	645.77	607.373	652.468	577.633	572.425	506.252	539.918	566.295	590.803	540.625	642.955	677.769	638.246	632.369	665.787	594.514	610.515
Q62422	Ostf1	Osteoclast-stimulating factor 1 OS=Mus musculus GN=Ostf1 PE=1 SV=2	656.688	615.908	590.046	640.866	557.283	587.05	600.589	631.481	628.28	588.588	686.867	667.581	613.876	656.689	619.915	624.942	640.413	614.563	645.619	676.249	674.16	623.739	550.214	524.058
A0A0R4J0D3	Stt3b	Dolichyl-diphosphooligosaccharide--protein glycosyltransferase subunit STT3B OS=Mus musculus GN=Stt3b PE=1 SV=1	623.463	670.253	610.959	521.29	607.694	633.969	1037.53	651.279	732.011	581.88	605.44	595.947	727.482	744.173	588.796	534.729	606.956	644.541	586.645	559.585	467.467	729.713	686.299	661.553
B1AT82	Prpsap1	MCG6846, isoform CRA_c OS=Mus musculus GN=Prpsap1 PE=1 SV=1	593.214	568.911	553.996	623.82	595.871	567.834	608.634	634.53	671.097	650.823	629.705	652.67	644.23	678.113	601.028	692.378	640.236	633.983	623.624	589.71	662.772	629.718	612.464	586.83
A0A1D5RLL3	Efr3a	Protein EFR3 homolog A OS=Mus musculus GN=Efr3a PE=1 SV=1	636.484	665.191	582.096	611.26	581.564	617.024	612.405	620.329	622.576	558.883	638.687	612.83	644.559	631.834	614.407	582.68	637.463	621.081	637.648	601.799	627.505	664.213	620.426	642.489
Q9CR95	Necap1	Adaptin ear-binding coat-associated protein 1 OS=Mus musculus GN=Necap1 PE=1 SV=2	579.874	567.938	594.881	622.518	617.826	567.388	647.312	647.296	636.105	645.47	685.99	700.653	693.606	689.928	635.238	620.659	646.2	695.095	646.752	656.354	650.9	645.81	608.177	586.181
P52189	Kcnj4	Inward rectifier potassium channel 4 OS=Mus musculus GN=Kcnj4 PE=1 SV=1	488.332	561.745	622.027	581.086	622.314	536.458	725.98	630.768	666.997	712.747	664.099	804.803	643.906	578.13	582.798	596.369	619.433	582.242	689.95	649.967	748.085	643.938	570.965	580.981
P35290	Rab24	Ras-related protein Rab-24 OS=Mus musculus GN=Rab24 PE=1 SV=2	596.71	660.636	655.788	724.079	693.859	643.655	622.848	600.615	495.75	598.491	488.221	612.06	456.92	515.816	459.675	542.548	521.35	469.65	538.155	646.729	559.357	543.947	654.537	657.724
P49443	Ppm1a	Protein phosphatase 1A OS=Mus musculus GN=Ppm1a PE=1 SV=1	578.329	609.886	578.956	572.105	597.297	614.43	622.397	602.165	602.416	608.888	630.302	566.067	608.571	582.405	607.838	640.041	610.68	671.125	616.296	608.63	630.915	652.533	602.659	582.74
Q9CQ65	Mtap	S-methyl-5'-thioadenosine phosphorylase OS=Mus musculus GN=Mtap PE=1 SV=1	588.372	557.258	577.942	590.961	597.055	525.194	608.527	620.668	672.268	646.428	687.619	613.791	652.94	672.847	617.858	632.223	655.817	673.156	617.428	662.814	685.017	662.503	642.919	591.238
Q9D328	Tmem35a	Transmembrane protein 35A OS=Mus musculus GN=Tmem35a PE=1 SV=1	609.062	539.47	608.407	518.645	619.871	642.208	642.179	765.521	729.23	737.607	785.944	641.203	626.694	591.038	747.691	737.591	600.931	635.762	590.11	586.626	733.43	655.915	594.266	558.075
Q8VC69	Slc22a6	Solute carrier family 22 member 6 OS=Mus musculus GN=Slc22a6 PE=1 SV=1	668.747	592.689	NA	NA	NA	NA	651.707	854.484	685.205	NA	NA	NA	247.889	417.846	NA	NA	444.648	617.521	478.697	NA	NA	582.596	711.817	594.899
P84309	Adcy5	Adenylate cyclase type 5 OS=Mus musculus GN=Adcy5 PE=1 SV=2	595.873	600.397	568.48	618.223	610.444	623.409	576.23	609.058	581.494	604.656	597.73	611.168	613.032	580.743	579.118	614.022	583.841	546.851	653.866	557.707	576.162	566.705	620.08	645.271
P19137	Lama1	Laminin subunit alpha-1 OS=Mus musculus GN=Lama1 PE=1 SV=1	878.443	587.696	614.353	415.089	710.309	553.502	743.449	774.458	644.389	616.17	538.989	729.419	1063.22	830.178	627.01	672.034	870.208	747.785	909.699	546.293	716.613	855.571	611.466	1015.07
O70258-2	Sgce	Isoform 2 of Epsilon-sarcoglycan OS=Mus musculus GN=Sgce	638.872	657.048	688.174	627.537	639.338	NA	611.612	564.822	576.824	580.894	447.9	NA	800.762	746.368	NA	671.194	735.196	668.476	704.92	577.971	684.357	603.317	640.022	718.941
Q9Z0P4-2	Palm	Isoform 2 of Paralemmin-1 OS=Mus musculus GN=Palm	626.751	597.794	618.875	563.815	622.154	592.949	632.533	596.373	606.231	636.037	636.438	632.749	519.869	638.558	542.884	635.355	556.816	654.872	627.083	594.79	600.251	592.314	577.196	566.544
P97441	Slc30a3	Zinc transporter 3 OS=Mus musculus GN=Slc30a3 PE=1 SV=1	632.96	640.739	614.366	664.972	669.972	653.537	598.158	596.315	602.173	598	584.688	643.231	799.942	675.239	598.842	599.307	694.36	685.893	592.317	561.517	539.033	571.195	552.548	647.666
Q3TXT3	Inip	SOSS complex subunit C OS=Mus musculus GN=Inip PE=3 SV=1	615.841	639.972	NA	NA	NA	763.085	671.498	523.96	385.56	NA	NA	232.631	189.33	236.836	531.155	NA	398.692	371.788	468.756	NA	NA	484.534	691.733	630.701
Q9JHW2	Nit2	Omega-amidase NIT2 OS=Mus musculus GN=Nit2 PE=1 SV=1	613.93	652.964	619.567	600.327	573.602	571.98	579.385	609.132	609.373	609.251	595.725	588.751	539.439	579.959	585.046	574.824	592.061	563.205	612.001	612.831	606.679	605.681	637.421	636.486
Q9CX86	Hnrnpa0	Heterogeneous nuclear ribonucleoprotein A0 OS=Mus musculus GN=Hnrnpa0 PE=1 SV=1	640.878	758.611	657.471	619.269	686.605	754.282	625.937	583.974	418.901	419.75	576.52	566.024	479.888	467.561	471.132	479.592	562.777	503.723	574.465	592.158	466.01	483.173	591.291	741.33
A0A1D5RLG3	Rab3gap1	Rab3 GTPase-activating protein catalytic subunit OS=Mus musculus GN=Rab3gap1 PE=1 SV=1	623.203	624.398	630.805	597.736	608.801	595.145	627.066	611.77	611.369	626.653	626.244	626.635	562.249	637.105	622.472	598.479	572.988	593.782	602.334	624.91	614.202	617.68	646.466	653.303
Q80Y98	Ddhd2	Phospholipase DDHD2 OS=Mus musculus GN=Ddhd2 PE=1 SV=3	569.275	574.943	561.874	638.603	607.619	573.048	661.488	633.79	674.565	625.099	722.49	693.45	658.645	701.319	670.349	664.172	630.079	648.663	619.034	595.217	667.57	647.219	604.764	576.614
Q61772	Epha7	Ephrin type-A receptor 7 OS=Mus musculus GN=Epha7 PE=1 SV=2	589.22	556.695	552.507	577.502	625.145	603.729	573.671	562.543	571.17	624.141	574.924	582.036	631.015	585.449	547.99	625.11	572.404	601.43	592.225	582.674	571.138	568.689	535.387	508.627
P97300	Nptn	Neuroplastin OS=Mus musculus GN=Nptn PE=1 SV=3	677.496	644.488	696.634	698.07	667.685	807.492	603.267	567.421	424.078	515.124	467.953	383.337	342.115	419.029	551.513	471.434	420.666	486.85	623.887	619.477	554.777	505.242	691.276	646.336
Q8CAK1	Iba57	Putative transferase CAF17 homolog, mitochondrial OS=Mus musculus GN=Iba57 PE=1 SV=1	529.408	554.537	603.103	573.85	590.601	592.668	672.466	638.384	590.08	706.112	650.107	662.8	512.541	540.698	648.818	632.034	572.661	715.554	696.847	618.316	637.549	655.652	625.161	571.18
B7ZBV9	Kcnq2	Potassium voltage-gated channel subfamily KQT member 2 OS=Mus musculus GN=Kcnq2 PE=1 SV=1	610.963	560.66	653.375	670.881	604.328	630.933	594.898	585.427	491.397	623.724	673.997	601.868	550.289	362.22	611.193	627.099	528.774	577.712	545.001	582.613	576.831	543.184	554.779	564.616
Q8BVZ5	Il33	Interleukin-33 OS=Mus musculus GN=Il33 PE=1 SV=1	NA	NA	499.819	461.841	543.767	478.387	NA	NA	637.823	650.986	550.604	464.353	NA	709.721	753.061	822.678	NA	NA	NA	577.494	689.239	NA	644.726	NA
P58069	Rasa2	Ras GTPase-activating protein 2 OS=Mus musculus GN=Rasa2 PE=1 SV=2	607.316	659.798	608.113	563.416	534.472	560.229	651.698	628.281	601.85	594.242	523.881	593.21	523.673	487.372	575.522	620.506	590.788	615.334	673.247	621.817	583.323	636.067	631.41	632.264
P62849	Rps24	40S ribosomal protein S24 OS=Mus musculus GN=Rps24 PE=1 SV=1	575.302	654.718	602.798	584.377	588.576	554.037	562.514	624.27	632.452	614.179	712.641	723.033	655.849	638.291	627.145	636.671	601.664	568.74	602.645	616.328	608.642	587.147	564.262	558.933
P62267	Rps23	40S ribosomal protein S23 OS=Mus musculus GN=Rps23 PE=1 SV=3	746.802	806.666	778.404	822.502	759.964	936.043	495.397	547.436	294.552	393.246	388.439	222.329	277.852	270.328	413.029	379.964	377.381	262.116	542.859	573.312	433.2	374.998	548.667	732.322
B2RQC6	Cad	CAD protein OS=Mus musculus GN=Cad PE=1 SV=1	597.826	641.449	580.957	612.741	612.6	583.921	644.093	621.514	644.412	638.603	696.244	677.795	741.895	701.074	645.421	643.033	689.573	665.816	588.397	579.329	625.118	643.235	473.954	564.758
Q9EQG7	Enpp5	Ectonucleotide pyrophosphatase/phosphodiesterase family member 5 OS=Mus musculus GN=Enpp5 PE=1 SV=3	612.833	617.19	599.397	603.954	550.008	592.785	579.387	557.189	683.961	574.006	596.031	604.048	696.593	598.291	665.28	682.115	696.394	601.009	621.972	614.934	627.618	684.76	648.152	675.34
Q56A08	Gpkow	G patch domain and KOW motifs-containing protein OS=Mus musculus GN=Gpkow PE=1 SV=2	553.106	588.489	NA	587.547	NA	NA	625.962	745.589	623.814	NA	662.435	NA	613.201	670.721	NA	NA	749.227	672.458	668.037	739.549	NA	619.543	629.881	581.071
Q9Z1T2	Thbs4	Thrombospondin-4 OS=Mus musculus GN=Thbs4 PE=1 SV=1	637.821	NA	708.461	530.815	626.348	861.789	NA	623.363	622.835	743.562	617.84	472.272	728.616	628.34	713.556	700.599	542.717	NA	NA	590.147	621.297	NA	773.909	823.241
Q9DD03	Rab13	Ras-related protein Rab-13 OS=Mus musculus GN=Rab13 PE=1 SV=1	621.428	664.832	632.771	664.621	607.232	592.55	543.536	622.951	526.972	551.639	588.198	620.28	588.422	578.798	579.554	532.058	589.197	506.33	619.975	611.3	577.863	533.46	608.351	602.182
Q8CH77	Nav1	Neuron navigator 1 OS=Mus musculus GN=Nav1 PE=1 SV=2	599.28	621.72	577.161	612.58	596.963	618.75	726.11	630.819	571.03	670.054	761.415	684.634	578.013	507.724	636.059	623.64	604.476	692.708	648.549	604.031	593.687	564.388	603.393	590.122
Q08509	Eps8	Epidermal growth factor receptor kinase substrate 8 OS=Mus musculus GN=Eps8 PE=1 SV=2	702.603	660.614	638.763	555.813	636.621	621.183	655.055	607.898	631.217	601.088	632.603	604.904	621.288	598.655	668.368	576.185	595.61	648.655	629.091	632.18	577.975	655.329	622.661	625.102
Q9CWJ9	Atic	Bifunctional purine biosynthesis protein PURH OS=Mus musculus GN=Atic PE=1 SV=2	610.94	596.249	610.768	613.518	620.098	631.149	607.958	610.155	633.725	587.326	623.594	590.961	646.088	638.427	643.517	590.062	634.531	655.818	685.985	658.668	633.145	661.198	644.909	643.316
P49813	Tmod1	Tropomodulin-1 OS=Mus musculus GN=Tmod1 PE=1 SV=2	569.263	605.468	587.999	554.884	558.723	600.494	666.774	619.729	635.248	662.982	645.384	660.953	665.247	657.605	694.012	656.726	626.033	700.789	696.054	598.973	662.378	603.222	601.011	562.159
G5E902	Slc25a3	MCG10343, isoform CRA_b OS=Mus musculus GN=Slc25a3 PE=1 SV=1	607.723	617.132	605.861	588.762	594.88	609.359	590.584	621.63	532.138	594.612	592.491	546.798	504.622	505.241	584.679	549.101	520.604	507.044	660.355	627.984	595.752	535.961	604.921	608.645
Q5SUR0	Pfas	Phosphoribosylformylglycinamidine synthase OS=Mus musculus GN=Pfas PE=1 SV=1	572.601	625.66	613.414	550.619	617.742	576.906	666.253	628.985	681.588	645.383	693.998	689.742	731.447	740.159	649.703	648.97	676.189	740.487	599.031	625.019	667.33	710.301	630.814	625.947
P11983	Tcp1	T-complex protein 1 subunit alpha OS=Mus musculus GN=Tcp1 PE=1 SV=3	680.509	652.73	627.479	664.301	637.347	627.79	596.838	637.332	530.689	588.338	594.822	555.787	489.62	503.432	576.412	583.62	549.83	499.238	623.519	613.163	588.403	553.226	673.146	652.107
Q9ES28	Arhgef7	Rho guanine nucleotide exchange factor 7 OS=Mus musculus GN=Arhgef7 PE=1 SV=2	647.467	651.354	641.337	647.469	639.914	628.006	655.724	623.181	590.537	620.467	583.574	608.521	602.43	546.356	614.412	589.717	616.588	623.143	633.386	616.766	621.375	609.899	626.8	662.52
Q64337	Sqstm1	Sequestosome-1 OS=Mus musculus GN=Sqstm1 PE=1 SV=1	569.394	573.231	559.619	503.183	517.744	518.198	615.146	590.738	647.232	646.727	547.78	611.9	615.598	629.177	540.919	571.515	654.345	628.202	605.735	609.119	642.122	610.021	604.43	689.177
Q80TG9	Lrfn2	Leucine-rich repeat and fibronectin type-III domain-containing protein 2 OS=Mus musculus GN=Lrfn2 PE=1 SV=2	594.66	537.613	628.04	556.009	625.716	643.541	696.698	630.131	688.777	649.875	575.239	634.716	695.935	783.502	671.118	629.325	685.559	672.483	596.969	586.314	645.094	658.151	610.519	618.778
Q9Z0L0	Tpbg	Trophoblast glycoprotein OS=Mus musculus GN=Tpbg PE=1 SV=3	619.933	588.269	611.286	577.647	598.157	620.85	594.423	653.989	621.12	589.962	587.862	615.603	754.565	759.034	622.243	663.29	711.607	660.01	613.894	522.502	663.057	623.111	527.394	667.442
Q9R1K9	Cetn2	Centrin-2 OS=Mus musculus GN=Cetn2 PE=1 SV=1	652.113	634.126	619.389	731.036	631.116	663.294	587.643	591.006	661.815	542.887	586.099	489.044	504.315	559.595	542.454	568.594	548.333	586.101	600.644	647.332	597.11	626.085	692.378	671.11
Q8R238	Sdsl	Serine dehydratase-like OS=Mus musculus GN=Sdsl PE=1 SV=1	601.891	649.938	624.932	650.43	708.887	580.404	566.07	540.447	NA	681.048	662.594	709.136	728.441	NA	666.059	654.868	670.897	720.04	613.203	757.144	711.608	728.518	NA	730.357
P24472	Gsta4	Glutathione S-transferase A4 OS=Mus musculus GN=Gsta4 PE=1 SV=3	607.139	603.952	665.533	612.065	654.112	712.04	601.656	568.478	594.637	575.387	537.406	503.294	597.309	632.32	651.162	578.677	607.197	584.967	569.007	614.453	604.913	584.605	553.255	558.067
P59708	Sf3b6	Splicing factor 3B subunit 6 OS=Mus musculus GN=Sf3b6 PE=1 SV=1	665.299	672.243	717.908	602.258	639.172	667.64	550.364	594.358	601.43	566.525	500.973	471.668	694.221	588.561	553.796	481.083	611.798	592.192	634.264	539.847	623.352	614.884	589.601	727.305
Q6V4S5	Sdk2	Protein sidekick-2 OS=Mus musculus GN=Sdk2 PE=1 SV=1	569.574	647.731	573.273	558.563	611.196	610.215	672.392	575.875	601.199	632.588	613.591	633.887	669.643	606.026	597.048	618.559	638.727	618.951	647.008	611.17	634.482	648.251	538.467	648.78
P62196	Psmc5	26S protease regulatory subunit 8 OS=Mus musculus GN=Psmc5 PE=1 SV=1	608.379	606.41	626.03	591.278	622.449	611.863	629.886	626.192	621.071	600.73	614.832	629.616	643.81	607.994	600.839	592.51	620.97	619.698	614.21	627.436	629.033	627.009	634.808	638.048
Q91VE0	Slc27a4	Long-chain fatty acid transport protein 4 OS=Mus musculus GN=Slc27a4 PE=1 SV=1	588.133	586.811	578.695	574.934	597.8	600.137	620.698	623.745	656.073	601.914	674.661	596.995	630.884	622.951	615.99	607.387	589.809	588.473	597.769	655.023	636.259	670.23	649.513	643.99
Q9DAK9	Phpt1	14 kDa phosphohistidine phosphatase OS=Mus musculus GN=Phpt1 PE=1 SV=1	657.487	732.964	733.408	632.205	682.049	648.835	616.023	577.326	552.462	549.292	537.555	587.108	487.535	537.316	543.38	543.498	566.433	608.014	629.732	645.057	533.073	581.696	662.413	685.019
P97492	Rgs14	Regulator of G-protein signaling 14 OS=Mus musculus GN=Rgs14 PE=1 SV=2	606.451	628.936	642.707	673.946	654.658	671.812	630.476	617.766	574.616	618.418	606.728	618.562	647.609	602.591	643.127	644.885	658.866	603.88	582.21	594.1	612.722	549.511	606.364	597.291
Q6GQW0	Btbd11	Ankyrin repeat and BTB/POZ domain-containing protein BTBD11 OS=Mus musculus GN=Btbd11 PE=2 SV=2	570.135	684.254	607.016	610.969	604.142	564.253	614.691	645.165	685.205	640.826	616.591	546.493	549.356	628.968	728.744	687.642	573.609	633.341	575.209	694.962	678.875	488.079	657.013	555.791
Q920M5-4	Coro6	Isoform D of Coronin-6 OS=Mus musculus GN=Coro6	569.438	580.377	639.29	582.054	554.235	578.454	664.355	619.939	689.368	719.986	711.21	657.731	658.613	822.67	663.605	700.732	676.694	737.142	641.825	620.023	701.976	600.822	651.055	554.943
Q02257	Jup	Junction plakoglobin OS=Mus musculus GN=Jup PE=1 SV=3	612.996	667.014	634.077	638.412	614.041	605.883	615.351	617.423	614.714	587.257	629.739	572.173	585.209	599.132	641.047	609.503	605.471	565.845	610.005	602.088	638.05	580.107	614.369	602.571
P47934	Crat	Carnitine O-acetyltransferase OS=Mus musculus GN=Crat PE=1 SV=3	607.607	595.345	629.479	586.625	614.291	562.704	638.121	629.482	594.299	619.728	633.796	614.933	660.32	639.966	606.81	617.533	634.647	667.848	624.957	667.959	623.845	633.872	607.433	605.904
Q8BV13	Cops7b	COP9 signalosome complex subunit 7b OS=Mus musculus GN=Cops7b PE=1 SV=1	543.386	565.704	573.762	615.437	578.106	593.23	582.499	592.057	604.102	614.53	681.217	607.296	562.823	637.854	562.75	586.872	598.098	594.969	652.213	615.875	608.663	601.155	601.08	529.678
Q9CRC9	Gnpda2	Glucosamine-6-phosphate isomerase 2 OS=Mus musculus GN=Gnpda2 PE=1 SV=1	611.52	582.825	640.039	598.513	579.522	595.558	593.751	594.023	630.366	607.785	557.678	607.719	689.267	646.195	611.604	631.365	672.892	606.985	621.384	585.366	635.298	614.908	643.792	607.867
Q9DCT1	Akr1e2	1,5-anhydro-D-fructose reductase OS=Mus musculus GN=Akr1e2 PE=1 SV=1	347.216	272.092	766.657	842.881	473.213	792.475	467.685	492.153	444.21	721.707	703.124	263.409	619.872	856.001	741.577	810.716	813.793	825.438	800.842	401.762	793.483	453.014	506.201	701.006
A0A0R4J0M1	Tbcc	Tubulin-specific chaperone C OS=Mus musculus GN=Tbcc PE=1 SV=1	647.885	601.755	664.645	626.36	604.335	599.705	568.897	577.317	591.787	564.846	572.556	653.574	629.638	600.631	566.813	531.923	599.295	641.313	652.451	598.404	565.756	645.317	615.613	662.668
B1AXZ4	Elavl2	ELAV-like protein OS=Mus musculus GN=Elavl2 PE=1 SV=1	623.195	635.904	638.193	635.543	612.437	621.026	573.64	611.439	620.705	597.758	598.546	578.191	616.404	614.468	628.685	579.257	599.657	575.849	625.724	638.576	606.417	621.91	603.8	607.707
E9PZ16	Hspg2	Basement membrane-specific heparan sulfate proteoglycan core protein OS=Mus musculus GN=Hspg2 PE=1 SV=1	564.641	552.487	575.864	623.232	571.494	580.262	601.771	643.231	618.319	656.963	678.037	597.434	663.054	644.735	657.84	699.942	628.595	623.497	589.84	639.539	645.563	586.613	630.172	614.251
Q6PGG6	Gnl3l	Guanine nucleotide-binding protein-like 3-like protein OS=Mus musculus GN=Gnl3l PE=1 SV=1	652.022	656.05	637.614	543.379	655.368	584.528	578.857	603.476	610.858	572.873	612.215	636.46	684.188	706.875	664.31	572.438	621.132	644.85	673.487	618.9	716.824	631.847	600.393	631.396
Q9CQI3	Gmfb	Glia maturation factor beta OS=Mus musculus GN=Gmfb PE=1 SV=3	658.758	599.215	636.665	591.846	626.171	649.886	619.032	619.573	533.949	536.172	521.87	475.948	455.051	541.667	562.264	520.427	529.173	506.214	580.987	615.793	568.542	511.449	592.607	659.971
E9QLH9	Prag1	PEAK1-related kinase-activating pseudokinase 1 OS=Mus musculus GN=Prag1 PE=1 SV=1	643.862	627.184	NA	739.723	NA	658.956	725.007	628.216	NA	NA	640.095	550.427	674.094	NA	649.005	NA	529.851	610.695	766.962	728.887	NA	680.345	NA	668.928
A2CG49-8	Kalrn	Isoform 8 of Kalirin OS=Mus musculus GN=Kalrn	625.998	660.906	617.958	650.258	637.377	635.424	657.743	624.336	620.782	652.179	638.648	651.712	615.772	596.381	638.514	620.885	637.226	598.518	658.202	600.87	633.383	589.823	629.846	633.31
Q91XH5	Spr	Sepiapterin reductase OS=Mus musculus GN=Spr PE=1 SV=1	622.198	594.379	622.039	591.856	593.639	604.598	613.167	597.779	599.915	593.335	585.614	550.732	581.853	645.349	591.998	576.231	600.574	600.456	600.07	636.869	608.212	613.377	615.523	581.968
Q6ZQK5	Acap2	Arf-GAP with coiled-coil, ANK repeat and PH domain-containing protein 2 OS=Mus musculus GN=Acap2 PE=1 SV=2	638.304	608.867	587.816	606.865	604.754	605.939	522.92	603.64	528.712	613.603	558.029	573.442	626.486	576.845	553.537	571.641	606.853	527.596	653.131	578.502	595.603	540.783	585.938	669.766
Q80WQ2	Vac14	Protein VAC14 homolog OS=Mus musculus GN=Vac14 PE=1 SV=1	629.454	666.688	647.596	668.349	638.264	652.736	650.939	601.425	638.58	599.628	564.474	553.23	593.372	657.152	661.445	580.662	617.183	596.338	625.553	612.488	639.267	605.374	661.963	581.134
Q9Z1N5	Ddx39b	Spliceosome RNA helicase Ddx39b OS=Mus musculus GN=Ddx39b PE=1 SV=1	630.651	656.666	646.041	663.896	618.72	629.293	597.418	590.333	527.873	587.422	555.292	538.891	570.458	505.767	556.031	572.472	596.522	543.837	556.963	623.999	595.933	573.457	599.745	645.477
A0A087WRM0	Cdv3	Protein CDV3 (Fragment) OS=Mus musculus GN=Cdv3 PE=1 SV=1	577.696	516.55	537.046	588.23	585.376	556.808	627.833	637.757	732.418	730.413	697.997	774.95	621.138	699.177	534.676	698.444	625.028	742.066	630.163	637.553	669.431	671.657	579.677	536.691
Q8BFR5	Tufm	Elongation factor Tu, mitochondrial OS=Mus musculus GN=Tufm PE=1 SV=1	600.739	598.266	591.743	577.085	581.927	581.712	626.207	623.765	599.119	613.415	628.218	660.147	585.28	600.958	573.514	545.665	573.06	621.756	650.406	627.918	583.934	607.019	605.029	612.204
Q64705	Usf2	Upstream stimulatory factor 2 OS=Mus musculus GN=Usf2 PE=1 SV=1	NA	NA	523.41	686.847	670.985	660.305	NA	NA	657.807	796.713	764.537	807.063	NA	556.802	731.007	973.134	NA	NA	NA	660.137	747.615	NA	659.114	NA
Q9WTS4	Tenm1	Teneurin-1 OS=Mus musculus GN=Tenm1 PE=1 SV=1	621.341	694.245	600.713	763.62	752.401	621.935	641.674	637.159	496.03	741.887	707.043	899.619	671.789	447.51	658.001	595.471	657.58	600.881	682.735	719.345	647.537	595.026	742.178	573.241
Q9CQN3	Tomm6	Mitochondrial import receptor subunit TOM6 homolog OS=Mus musculus GN=Tomm6 PE=3 SV=1	659.318	695.228	647.174	589.866	672.101	666.872	553.95	586.432	507.327	552.269	499.14	538.861	601.794	591.071	517.164	558.426	661.962	490.377	641.086	580.642	604.061	520.709	553.797	764.091
Q9CQ22	Lamtor1	Ragulator complex protein LAMTOR1 OS=Mus musculus GN=Lamtor1 PE=1 SV=1	641.293	628.614	639.76	658.477	586.313	615.998	663.131	636.516	640.528	627.097	665.848	723.267	697.222	677.789	660.63	614.584	698.635	718.743	636.971	675.147	653.513	678.371	614.902	648.424
Q8K1A6	Cc2d1a	Coiled-coil and C2 domain-containing protein 1A OS=Mus musculus GN=Cc2d1a PE=1 SV=2	607.425	601.197	573.1	595.723	586.005	608.886	584.537	628.218	646.321	633.148	664.219	589.608	662.653	624.584	624.803	604.971	604.067	623.01	615.714	618.704	631.141	610.79	582.673	603.786
Q80X90	Flnb	Filamin-B OS=Mus musculus GN=Flnb PE=1 SV=3	619.675	580.761	569.773	584.075	572.94	601.457	673.879	632.447	613.294	592.9	674.883	570.428	707.39	688.677	655.874	676.504	697.485	802.123	606.057	608.416	675.145	666.695	615.826	584.029
Q9D8P4	Mrpl17	39S ribosomal protein L17, mitochondrial OS=Mus musculus GN=Mrpl17 PE=1 SV=1	709.553	665.006	679.35	555.465	591.58	574.871	669.233	624.503	600.58	523.407	638.624	524.11	662.169	589.415	609.334	573.632	639.549	597.353	623.659	587.982	609.744	633.832	552.343	663.077
Q8VHJ5	Mark1	Serine/threonine-protein kinase MARK1 OS=Mus musculus GN=Mark1 PE=1 SV=2	637.741	626.385	610.245	668.875	609.742	631.383	663.473	639.114	594.521	625.396	614.066	605.886	561.053	536.266	605.796	595.642	579.845	600.647	626.489	654.973	621.324	582.257	612.51	610.631
Q9Z0R4	Itsn1	Intersectin-1 OS=Mus musculus GN=Itsn1 PE=1 SV=2	596.12	612.343	620.452	576.194	607.775	606.048	637.006	630.957	641.021	653.689	634.115	620.153	652.102	609.84	637.606	631.767	615.457	619.203	580.844	612.365	633.14	625.452	631.184	578.423
Q8BNA6	Fat3	Protocadherin Fat 3 OS=Mus musculus GN=Fat3 PE=1 SV=2	NA	NA	NA	700.445	NA	690.947	NA	NA	515.315	NA	552.467	476.109	NA	496.335	585.151	NA	NA	NA	NA	719.603	NA	NA	702.151	NA
F6TQW2	Ighg2c	Immunoglobulin heavy constant gamma 2C OS=Mus musculus GN=Ighg2c PE=1 SV=1	824.732	1023.53	241.413	201.244	361.688	895.75	592.82	325.517	692.789	525.278	898.383	460.268	1212.5	658.095	1362.15	911.577	586.087	691.509	889.797	1002.61	2315.48	916.067	747.769	1028.7
Q8VD37	Sgip1	SH3-containing GRB2-like protein 3-interacting protein 1 OS=Mus musculus GN=Sgip1 PE=1 SV=1	588.47	588.21	606.507	621.044	599.708	599.369	637.291	593.639	646.13	624.544	673.04	651.029	700.416	651.974	620.025	628.051	621.238	676.781	628.396	624.755	603.075	615.955	602.677	609.612
P62918	Rpl8	60S ribosomal protein L8 OS=Mus musculus GN=Rpl8 PE=1 SV=2	629.695	671.981	592.158	708.989	600.889	614.976	680.621	627.229	503.911	648.979	601.309	579.323	359.417	380.576	597.225	608.535	461.101	533.093	596.883	689.522	598.452	593.992	688.249	619.77
J3QPG5	Psap	Prosaposin OS=Mus musculus GN=Psap PE=1 SV=1	616.538	511.91	678.651	586.808	604.675	685.44	530.844	588.038	624.062	577.44	641.097	552.358	448.8	666.775	648.776	621.614	628.681	763.632	644.684	666.591	652.374	696.01	691.196	536.347
Q8BW22	Ss18l1	Calcium-responsive transactivator OS=Mus musculus GN=Ss18l1 PE=1 SV=1	727.71	NA	435.073	483.274	369.923	NA	NA	523.601	NA	667.114	608.214	NA	366.827	NA	NA	701.694	458.316	NA	NA	573.55	508.269	NA	NA	626.945
G3XA53	Omg	Oligodendrocyte myelin glycoprotein OS=Mus musculus GN=Omg PE=1 SV=1	632.863	632.533	630.986	599.119	638.386	609.076	586.867	606.576	588.554	571.75	577.588	565.119	686.31	676.917	605.018	633.406	655.944	585.032	568.287	623.566	568.723	578.363	573.029	570.501
Q6PH08	Erc2	ERC protein 2 OS=Mus musculus GN=Erc2 PE=1 SV=2	611.366	616.078	651.161	629.917	632.175	629.998	605.599	601.465	589.348	623.051	586.054	573.173	604.307	556.799	585.782	606.031	589.566	606.066	629.061	602.26	591.475	608.068	591.031	619.974
A2APM2	Cd44	CD44 antigen OS=Mus musculus GN=Cd44 PE=1 SV=1	NA	572.733	NA	767.377	NA	NA	565.639	NA	NA	NA	497.951	NA	NA	NA	NA	NA	NA	672.63	455.811	486.588	NA	605.293	NA	NA
O35143	Atpif1	ATPase inhibitor, mitochondrial OS=Mus musculus GN=Atpif1 PE=1 SV=2	684.016	632.541	673.298	696.502	651.562	778.326	567.214	546.407	393.976	555.766	456.905	310.208	240.347	335.467	559.327	498.239	412.377	367.375	591.229	616.162	519.901	480.355	651.473	599.07
Q5PR73	Diras2	GTP-binding protein Di-Ras2 OS=Mus musculus GN=Diras2 PE=1 SV=1	629.047	595.765	598.319	636.991	622.202	606.006	579.456	636.008	560.064	552.883	593.536	552.352	524.786	504.846	559.104	520.197	598.071	494.88	590.315	643.591	565.703	547.201	627.614	657.655
F8VQ05	Fryl	FRY-like transcription coactivator OS=Mus musculus GN=Fryl PE=1 SV=1	619.628	579.149	607.569	690.863	615.647	641.918	615.112	622.608	649.005	631.886	662.357	682.705	697.013	701.054	663.916	677.622	718.247	634.323	627.51	654.555	636.684	661.531	595.057	690.555
P15105	Glul	Glutamine synthetase OS=Mus musculus GN=Glul PE=1 SV=6	617.773	611.694	662.771	546.313	638.871	595.578	550.76	612.82	606.776	550.279	625.689	627.264	609.108	650.987	639.829	633.94	633.805	593.354	601.267	644.485	575.981	637.126	645.978	603.594
Q61704	Itih3	Inter-alpha-trypsin inhibitor heavy chain H3 OS=Mus musculus GN=Itih3 PE=1 SV=3	615.45	768.005	667.718	673.87	638.294	609.026	631.383	541.542	639.612	646.154	637.943	734.63	548.53	513.85	657.375	614.922	581.863	643.681	590.939	700.144	586.212	748.702	506.257	560.464
O35409	Folh1	Glutamate carboxypeptidase 2 OS=Mus musculus GN=Folh1 PE=1 SV=2	624.665	619.692	668.368	567.901	717.547	579.286	657.835	621.383	686.979	601.172	650.2	661.523	773.75	770.165	684.435	679.25	645.634	714.227	676.732	654.288	661.107	787.65	719.916	607.763
E9PY58	Clpb	Caseinolytic peptidase B protein homolog OS=Mus musculus GN=Clpb PE=1 SV=1	577.196	651.817	608.473	615.794	584.111	601.975	682.699	665.638	722.85	659.685	712.816	670.379	607.279	692.355	714.315	685.321	630.692	745.891	648.381	645.419	676.415	664.843	632.956	559.399
E9QNR6	AI837181	Expressed sequence AI837181 OS=Mus musculus GN=AI837181 PE=1 SV=1	624.872	663.022	605.256	537.051	560.693	571.521	550.407	595.868	594.784	565.517	532.337	618.197	701.594	673.722	546.918	565.963	664.746	655.188	661.872	584.065	603.592	624.663	601.146	679.891
P18572	Bsg	Basigin OS=Mus musculus GN=Bsg PE=1 SV=2	651.519	592.254	629.18	647.133	628.324	721.245	642.38	615.9	533.133	603.087	489.598	367.796	450.188	498.16	519.887	532.565	492.376	572.63	567.319	596.146	590.95	487.788	646.126	614.048
P08752	Gnai2	Guanine nucleotide-binding protein G(i) subunit alpha-2 OS=Mus musculus GN=Gnai2 PE=1 SV=5	656.347	697.764	669.785	679.201	678.464	649.073	630.801	614.615	609.354	565.961	611.279	655.502	637.14	698.137	636.054	610.944	644.036	639.863	646.794	641.782	606.684	627.499	673.817	621.343
P97300-3	Nptn	Isoform 3 of Neuroplastin OS=Mus musculus GN=Nptn	694.34	655.388	706.85	732.274	660.382	834.063	603.192	568.161	402.487	499.08	415.529	310.409	301.289	372.528	536.244	450.982	392.048	466.386	619.355	621.359	538.947	491.083	698.188	647.157
Q8K273	Mmgt1	Membrane magnesium transporter 1 OS=Mus musculus GN=Mmgt1 PE=1 SV=1	594.769	586.252	584.565	621.931	579.971	546.998	588.258	617.638	652.296	665.228	704.932	740.13	710.434	723.054	601.309	623.17	613.516	638.854	605.536	565.395	645.616	634.506	574.388	589.115
A2AI87	Phka1	Phosphorylase b kinase regulatory subunit alpha, skeletal muscle isoform OS=Mus musculus GN=Phka1 PE=1 SV=1	616.258	649.582	621.167	570.374	684.709	619.43	580.395	577.491	548.291	631.289	638.248	601.548	572.339	564.05	620.484	691.641	614.896	634.208	606.098	560.734	582.67	650.797	663.817	603.989
B0QZL1	Eno1	Alpha-enolase (Fragment) OS=Mus musculus GN=Eno1 PE=1 SV=1	566.359	582.384	608.433	622.366	595.348	606.508	619.095	610.886	611.272	609.344	612.996	631.078	671.464	673.979	619.359	582.099	635.518	670.194	670.559	638.963	622.49	647.229	619.47	692.133
A0A0U1RNF2	Lcmt1	Leucine carboxyl methyltransferase 1 OS=Mus musculus GN=Lcmt1 PE=1 SV=1	672.776	663.722	653.11	626.84	654.544	667.254	586.916	582.814	517.577	667.606	553.563	552.585	596.737	473.178	594.96	570.866	650.761	628.22	618.919	530.623	598.145	563.836	583.833	619.334
Q99LM2	Cdk5rap3	CDK5 regulatory subunit-associated protein 3 OS=Mus musculus GN=Cdk5rap3 PE=1 SV=1	615.442	576.649	622.544	629.115	589	568.179	592.154	603.798	635.21	540.289	568.99	545.603	626.438	618.861	594.714	511.516	566.622	537.893	572.788	625.725	551.556	570.119	594.602	596.43
Q8R1N4	Nudcd3	NudC domain-containing protein 3 OS=Mus musculus GN=Nudcd3 PE=1 SV=3	527.684	542.676	554.207	603.995	575.278	622.322	711.537	662.041	759.896	690.323	646.228	525.123	541.956	584.322	598.58	681.494	571.471	646.962	589.835	633.372	653.906	659.697	629.126	466.75
A0A140LI48	Pcdhgb8	Uncharacterized protein OS=Mus musculus GN=Pcdhgb8 PE=4 SV=1	595.993	510.035	544.889	530.099	511.555	642.918	728.721	753.171	659.534	660.444	738.596	454.682	536.417	552.449	547.881	663.104	662.09	633.203	597.239	698.978	745.191	652.8	662.006	622.02
D3Z4S3	Ptrhd1	Putative peptidyl-tRNA hydrolase PTRHD1 OS=Mus musculus GN=Ptrhd1 PE=1 SV=1	621.164	536.913	553.653	555.318	571.736	678.518	545.126	604.682	563.951	593.663	491.579	460.677	579.409	505.594	643.8	587.094	604.646	560.255	590.236	634.709	597.751	616.178	620.712	665.785
Q5XPI3-2	Rnf123	Isoform 2 of E3 ubiquitin-protein ligase RNF123 OS=Mus musculus GN=Rnf123	615.738	627.099	608.107	676.301	595.21	632.273	611.726	605.651	546.155	585.225	658.363	632.882	489.466	502.32	610.619	562.111	552.276	531.171	637.626	602.372	609.517	554.219	607.088	591.067
Q9CR59	Gadd45gip1	Growth arrest and DNA damage-inducible proteins-interacting protein 1 OS=Mus musculus GN=Gadd45gip1 PE=1 SV=1	625.501	602.799	614.552	544.893	551.668	598.201	548.368	555.83	617.187	534.595	591.754	620.981	726.574	619.35	613.053	588.69	617.612	644.714	596.369	534.838	588.259	601.552	583.216	620.265
S4R270	Bin2	Bridging integrator 2 OS=Mus musculus GN=Bin2 PE=1 SV=1	670.522	586.434	763.741	712.645	727.92	841.177	579.331	582.223	384.833	455.47	391.998	294.033	276.575	325.272	522.579	437.848	380.694	352.148	565.722	626.625	492.956	446.691	709.437	657.384
Q3UJP5	Protein C8orf37 homolog OS=Mus musculus	Protein C8orf37 homolog OS=Mus musculus PE=1 SV=1	614.052	608.838	653.217	535.182	569.912	610.111	544.876	534.782	650.021	583.898	590.637	604.766	556.18	579.503	568.217	553.112	608.508	593.296	640.621	548.257	607.141	616.481	627.704	665.09
Q9Z2Q6	2019-09-05	Septin-5 OS=Mus musculus GN=Sept5 PE=1 SV=2	631.778	644.644	662.28	633.499	657.25	644.727	602.059	604.41	553.014	591.914	568.052	643.029	611.307	607.672	558.76	576.039	591.913	615.312	694.213	631.208	602.776	606.516	630.813	632.564
B2RQ80	Tnik	Tnik protein OS=Mus musculus GN=Tnik PE=1 SV=1	632.726	636.2	602.634	634.636	623.99	620.885	617.696	634.657	586.067	640.768	646.006	592.433	571.157	580.233	570.007	599.003	562.469	614.251	620.663	610.132	576.323	587.223	621.496	621.661
Q9CWU6	Uqcc1	Ubiquinol-cytochrome-c reductase complex assembly factor 1 OS=Mus musculus GN=Uqcc1 PE=1 SV=1	563.069	633.536	598.518	621.329	568.937	594.304	650.055	692.432	613.058	654.077	714.244	668.94	634.305	652.843	705.465	665.061	675.841	722.548	609.997	661.8	709.816	624.727	605.677	626.951
Q9CZH7	Mxra7	Matrix-remodeling-associated protein 7 OS=Mus musculus GN=Mxra7 PE=1 SV=2	548.24	697.888	518.236	563.771	547.719	633.454	731.001	670.443	684.082	574.315	534.349	589.319	471.753	657.161	661.274	586.931	516.66	672.19	674.014	609.362	537.649	717.187	678.121	571.727
Q9DC69	Ndufa9	NADH dehydrogenase [ubiquinone] 1 alpha subcomplex subunit 9, mitochondrial OS=Mus musculus GN=Ndufa9 PE=1 SV=2	638.507	613.875	618.49	587.077	582.32	621.471	636.468	614.118	566.965	581.661	604.728	472.86	395.036	488.4	587.317	535.954	466.79	525.865	595.457	644.846	561.165	554.422	635.346	607.231
P97291	Cdh8	Cadherin-8 OS=Mus musculus GN=Cdh8 PE=1 SV=2	NA	602.423	520.345	518.897	508.519	575.095	620.333	NA	707.762	671.971	652.46	690.596	NA	697.87	640.248	673.618	NA	751.148	648.481	585.158	541.006	685.11	504.27	NA
Q99P31	Hspbp1	Hsp70-binding protein 1 OS=Mus musculus GN=Hspbp1 PE=1 SV=1	565.77	571.679	615.729	642.883	724.11	598.185	559.86	629.407	573.447	629.695	592.67	614.533	656.288	678.982	575.007	602.367	630.592	590.487	708.153	588.83	623.901	641.791	609.735	658.031
D3Z7P3	Gls	Glutaminase kidney isoform, mitochondrial OS=Mus musculus GN=Gls PE=1 SV=1	625.488	595.42	616.668	593.986	584.117	598.159	630.015	618.865	628.342	615.129	627.527	628.127	626.609	629.897	582.496	626.046	618.443	633.918	576.406	507.785	634.019	573.401	601.88	634.454
Q61361	Bcan	Brevican core protein OS=Mus musculus GN=Bcan PE=1 SV=2	654.405	627.949	624.767	601.003	635.537	653.245	582.14	581.941	628.053	616.395	584.404	625.115	657.409	609.574	602.481	607.124	607.098	633.787	592.976	611.206	589.482	637.947	619.819	653.747
A2AAY5	Sh3pxd2b	SH3 and PX domain-containing protein 2B OS=Mus musculus GN=Sh3pxd2b PE=1 SV=1	648.347	599.723	616.381	594.263	554.671	515.202	652.328	619.633	NA	580.248	632	664.68	637.411	NA	669.266	658.202	652.268	666.078	600.328	592.737	626.139	611.849	NA	544.067
Q91VR8	Brk1	Protein BRICK1 OS=Mus musculus GN=Brk1 PE=1 SV=1	746.057	725.36	657.715	637.005	617.373	647.165	569.191	601.064	561.229	598.547	578.535	547.65	538.725	609.094	510.401	561.936	578.859	458.613	636.077	596.089	555.69	539.932	609.106	709.896
P61027	Rab10	Ras-related protein Rab-10 OS=Mus musculus GN=Rab10 PE=1 SV=1	612.179	635.552	638.944	645.974	611.351	577.367	572.378	600.391	518.83	563.231	578.636	611.073	555.112	533.066	562.28	547.742	568.723	544.473	592.11	607.136	576.565	536.573	597.132	617.52
A0A1D5RML8	Polr2c	DNA-directed RNA polymerase II subunit RPB3 OS=Mus musculus GN=Polr2c PE=1 SV=1	582.261	584.863	NA	551.094	NA	559.954	710.178	611.313	629.732	NA	693.185	585.675	595.553	552.876	663.065	NA	610.03	734.1	532.852	581.247	NA	643.809	577.515	464.662
Q9WTX2	Prkra	Interferon-inducible double-stranded RNA-dependent protein kinase activator A OS=Mus musculus GN=Prkra PE=1 SV=1	588.002	635.714	640.185	629.94	558.107	567.647	638.407	620.084	690.016	579.678	614.791	623.279	637.704	679.439	659.387	590.205	627.441	633.216	566.794	679.995	603.012	652.782	641.749	574.571
Q8CIN6-2	Celf3	Isoform 2 of CUGBP Elav-like family member 3 OS=Mus musculus GN=Celf3	494.387	537.97	550.531	645.484	551.397	600.49	566.758	617.07	691.556	653.561	686.676	665.061	684.051	663.227	648.882	711.932	624.9	650.296	533.121	697.344	669.098	601.152	526.971	565.946
Q8CCK0	H2afy2	Core histone macro-H2A.2 OS=Mus musculus GN=H2afy2 PE=1 SV=3	647.103	621.497	686.304	581.358	680.16	670.959	624.959	611.641	550.916	535.717	571.401	499.652	597.021	606.779	593.654	502.886	559.357	584.004	567.791	628.112	576.937	564.191	577.088	639.65
Q62095	Ddx3y	ATP-dependent RNA helicase DDX3Y OS=Mus musculus GN=Ddx3y PE=1 SV=2	651.012	621.999	665.027	637.774	644.443	652.071	599.261	606.328	584.841	584.905	564.823	530.972	545.751	538.229	586.173	524.822	576.92	576.858	600.624	652.875	618.072	612.351	626.15	630.416
P20060	Hexb	Beta-hexosaminidase subunit beta OS=Mus musculus GN=Hexb PE=1 SV=2	601.268	574.273	552.4	633.544	639.616	636.886	640.672	630.531	601.205	612.309	635.369	686.228	632.968	582.874	707.289	705.023	660.397	680.676	659.826	656.53	655.167	634.96	640.379	583.673
Q9WTX6	Cul1	Cullin-1 OS=Mus musculus GN=Cul1 PE=1 SV=1	658.157	608.45	656.866	681.999	634.79	674.815	569.51	590.087	528.891	582.708	540.486	500.379	437.801	520.523	569.735	550.221	518.922	506.794	583.996	618.645	574.89	560.682	606.138	649.409
F8WIT2	Anxa6	Annexin OS=Mus musculus GN=Anxa6 PE=1 SV=1	630.159	616.265	691.198	644.947	686.578	678.307	626.865	623.016	597.575	627.314	615.606	623.057	586.112	593.442	571.296	584.024	585.681	610.438	703.507	610.024	643.717	605.174	655.496	623.412
E9Q9F1	Kcnq5	Potassium voltage-gated channel subfamily KQT member 5 OS=Mus musculus GN=Kcnq5 PE=1 SV=1	NA	490.133	NA	513.703	NA	NA	645.557	NA	NA	NA	543.458	NA	NA	NA	NA	NA	NA	694.859	621.099	574.523	NA	568.653	NA	NA
Q9CZW4	Acsl3	Long-chain-fatty-acid--CoA ligase 3 OS=Mus musculus GN=Acsl3 PE=1 SV=2	654.775	584.65	644.969	642.95	581.722	625.599	577.778	600.478	631.506	597.029	630.009	634.381	681.492	691.854	625.732	614.269	659.263	587.239	602.018	614.507	639.532	617.228	619.381	695.489
Q7TQK5	Ccdc93	Coiled-coil domain-containing protein 93 OS=Mus musculus GN=Ccdc93 PE=1 SV=1	657.778	597.119	611.876	659.615	637.354	593.132	666.465	640.132	619.741	617.504	620.451	525.055	614.293	605.374	604.818	647.955	613.108	658.008	636.53	672.372	671.095	655.65	589.866	592.355
Q8BFZ3	Actbl2	Beta-actin-like protein 2 OS=Mus musculus GN=Actbl2 PE=1 SV=1	625.717	632.307	660.657	609.69	640.501	651.468	607.533	595.05	585.115	575.971	559.117	572.662	568.878	620.592	592.643	560.443	579.134	596.328	670.479	623.666	612.822	618.392	626.687	695.847
Q3B7Z2	Osbp	Oxysterol-binding protein 1 OS=Mus musculus GN=Osbp PE=1 SV=3	651.993	607.295	588.631	610.328	597.079	625.337	586.361	627.236	644.792	633.497	607.088	610.397	630.302	674.992	598.416	647.717	634.286	655.984	642.294	590.191	611.418	641.716	633.054	668.001
P55096	Abcd3	ATP-binding cassette sub-family D member 3 OS=Mus musculus GN=Abcd3 PE=1 SV=2	643.712	579.469	652.565	640.644	652.739	610.884	573.523	638.469	625.733	630.494	608.678	649.888	646.049	584.752	600.321	629.769	679.658	653.33	539.769	597.086	615.22	576.33	610.523	618.549
P14824	Anxa6	Annexin A6 OS=Mus musculus GN=Anxa6 PE=1 SV=3	630.159	616.265	691.148	644.947	686.736	678.307	626.865	623.016	597.575	627.579	615.606	623.057	586.112	593.442	571.296	583.979	585.681	610.438	703.507	610.024	643.559	605.174	655.496	623.412
O55131	2019-09-07	Septin-7 OS=Mus musculus GN=Sept7 PE=1 SV=1	606.513	586.433	609.349	603.897	621.745	651.146	585.336	610.016	565.891	604.446	600.678	583.077	574.795	565.935	574.207	574.474	547.004	582.918	637.643	659.947	593.361	577.238	617.716	612.477
Q9CPV4	Glod4	Glyoxalase domain-containing protein 4 OS=Mus musculus GN=Glod4 PE=1 SV=1	705.906	703.248	619.281	553.63	580.578	580.608	575.297	565.483	691.985	547.682	557.555	590.52	613.182	613.219	591.25	556.946	613.813	635.68	612.413	687.647	706.103	604.375	601.785	595.614
Q6NV49	Pld2	Phospholipase D2 OS=Mus musculus GN=Pld2 PE=1 SV=1	684.576	650.069	647.317	610.533	614.191	600.42	570.642	603.493	653.438	564.029	588.35	464.612	736.299	667.775	574.131	562.967	683.333	645.061	609.365	588.408	604.046	714.913	564.336	659.153
P01898	H2-Q10	H-2 class I histocompatibility antigen, Q10 alpha chain OS=Mus musculus GN=H2-Q10 PE=1 SV=3	604.417	486.162	788.976	503.568	485.788	575.093	662.652	724.64	647.337	507.978	599.488	430.782	619.833	651.992	744.902	600.397	617.412	655.485	540.433	686.132	683.771	674.878	634.059	612.999
Q8CAA7	Pgm2l1	Glucose 1,6-bisphosphate synthase OS=Mus musculus GN=Pgm2l1 PE=1 SV=1	665.247	655.241	619.466	656.823	651.293	654.919	551.483	627.626	542.082	571.635	533.398	560.921	577.872	568.072	559.075	598.283	628.105	553.329	588.081	578.519	578.429	540.444	573.624	641.22
Q8C788	Snx18	Sorting nexin OS=Mus musculus GN=Snx18 PE=1 SV=1	620.387	514.599	519.805	521.947	496.401	624.912	622.234	669.873	676.296	615.116	668.278	570.341	720.084	673.554	636.719	562.168	698.069	502.981	496.586	612.174	563.789	689.596	635.533	598.871
Q9DB75	Cdip1	Cell death-inducing p53-target protein 1 OS=Mus musculus GN=Cdip1 PE=2 SV=1	689.083	477.741	728.822	668.652	688.535	624.377	487.575	590.796	481.008	582.093	341.428	378.699	378.352	419.56	400.492	484.607	460.735	498.84	517.119	610.662	571.946	434.994	695.791	639.021
Q8BH64	Ehd2	EH domain-containing protein 2 OS=Mus musculus GN=Ehd2 PE=1 SV=1	654.384	652.958	617.976	585.299	609.879	559.457	614.309	610.046	697.68	478.327	682.331	593.44	597.048	627.274	616.548	560.035	671.037	656.696	579.932	756.115	612.877	681.829	639.895	662.253
Q8CCT4	Tceal5	Transcription elongation factor A protein-like 5 OS=Mus musculus GN=Tceal5 PE=1 SV=1	780.001	695.396	766.187	727.81	721.948	841.651	654.819	543.739	373.213	463.036	454.237	173.175	164.804	237.136	371.649	410.584	292.55	348.914	452.503	673.694	483.088	429.759	705.217	682.082
Q8VE33	Gdap1l1	Ganglioside-induced differentiation-associated protein 1-like 1 OS=Mus musculus GN=Gdap1l1 PE=1 SV=1	593.942	650.522	610.668	730.897	640.265	613.766	675.419	679.552	672.337	658.199	707.313	736.401	606.88	627.672	675.578	650.171	611.248	628.237	625.558	668.953	635.793	621.128	644.94	553.17
P70208	Plxna3	Plexin-A3 OS=Mus musculus GN=Plxna3 PE=1 SV=2	600.932	575.996	623.031	669.742	631.002	632.129	607.277	637.3	558.235	588.327	579.901	636.864	641.881	594.727	620.58	621.085	631.862	600.521	593.247	628.083	616.117	554.712	557.616	553.688
Q9ERA0-2	Tfcp2	Isoform 2 of Alpha-globin transcription factor CP2 OS=Mus musculus GN=Tfcp2	662.241	566.357	621.99	615.446	642.006	636.682	581.358	637.355	679.063	598.639	483.696	648.3	745.745	753.893	704.906	598.226	693.586	580.973	629.359	558.341	636.336	604.852	622.041	692.543
Q9Z0W3	Nup160	Nuclear pore complex protein Nup160 OS=Mus musculus GN=Nup160 PE=1 SV=2	536.569	545.292	632.461	664.66	595.712	675.66	580.447	567.352	570.851	618.523	651.894	619.657	642.944	657.384	636.119	574.206	624.533	626.768	600.901	653.342	566.3	546.055	539.324	551.875
F8WHW6	Pip5k1c	Phosphatidylinositol 4-phosphate 5-kinase type-1 gamma OS=Mus musculus GN=Pip5k1c PE=1 SV=1	615.338	582.144	591.696	608.193	609.971	600.626	607.386	615.434	571.117	591.842	581.333	625.029	617.343	605.83	577.065	596.068	628.031	622.156	644.597	623.335	639.869	601.446	592.482	638.856
Q8CGF5	Tmem56	Transmembrane protein 56 OS=Mus musculus GN=Tmem56 PE=2 SV=1	NA	NA	NA	665.536	NA	NA	NA	NA	524.666	NA	550.086	NA	NA	629.768	NA	NA	NA	NA	NA	627.878	NA	NA	554.742	NA
F7D3W5	Gm45837	Phosphodiesterase OS=Mus musculus GN=Gm45837 PE=1 SV=1	612.281	614.008	596.79	685.94	585.863	634.574	575.136	644.913	582.064	627.399	619.344	634.359	594.298	551.356	605.764	618.53	626.232	559.001	643.515	585.203	608.946	568.619	608.303	619.063
A8DUK4	Hbbt1	Beta-globin OS=Mus musculus GN=Hbbt1 PE=1 SV=1	599.401	844.974	704.606	669.031	684.892	619.38	718.674	747.533	826.593	618.229	586.179	565.637	603.873	671.119	660.805	514.937	709.235	678.827	631.913	662.959	699.685	735.496	529.363	682.244
A2BDX3	Mocs3	Adenylyltransferase and sulfurtransferase MOCS3 OS=Mus musculus GN=Mocs3 PE=1 SV=1	661.17	649.888	585.266	595.733	565.822	626.959	557.244	602.455	649.303	616.282	519.312	456.584	556.53	595.654	539.822	611.323	594.618	527.031	613.09	646.344	689.921	601.168	719.051	687.172
Q71M36	Cspg5	Chondroitin sulfate proteoglycan 5 OS=Mus musculus GN=Cspg5 PE=1 SV=2	678.361	564.857	598.357	607.651	628.666	633.501	539.717	596.613	637.315	582.682	632.846	646.412	509.245	612.735	607.112	558.09	635.018	670.103	575.846	614.77	562.517	615.069	631.48	577.166
D3Z7P3-2	Gls	Isoform 2 of Glutaminase kidney isoform, mitochondrial OS=Mus musculus GN=Gls	627.981	604.565	622.147	590.623	584.377	606.169	633.161	616.735	625.953	603.667	615.774	618.051	623.427	632.919	587.485	611.488	612.854	632.62	599.032	518.824	629.808	570.915	602.877	632.897
P47963	Rpl13	60S ribosomal protein L13 OS=Mus musculus GN=Rpl13 PE=1 SV=3	572.774	562.87	596.089	573.109	596.486	604.93	634.481	668.003	690.138	659.281	608.64	539.388	644.491	591.447	660.121	688.171	600.905	620.262	582.61	667.263	659.246	642.975	627.169	592.739
Q6P1Y9	Exoc1	Exocyst complex component 1 OS=Mus musculus GN=Exoc1 PE=1 SV=1	620.361	615.958	642.619	601.035	634.549	610.179	584.878	604.666	591.29	646.465	595.416	667.962	624.977	598.116	613.375	600.823	615.993	577.106	634.669	599.933	602.038	607.079	589.8	621.699
Q9DBH5	Lman2	Vesicular integral-membrane protein VIP36 OS=Mus musculus GN=Lman2 PE=1 SV=2	603.302	586.564	684.665	647.188	670.831	656.898	561.538	592.775	521.779	589.503	642.501	627.585	495.435	445.403	668.972	560.227	498.745	576.407	597.096	601.716	681.041	615.864	554.277	752.821
Q8K3C3	Lzic	Protein LZIC OS=Mus musculus GN=Lzic PE=1 SV=1	726.502	714.731	680.027	616.464	636.455	610.145	602.611	609.982	601.211	574.111	623.912	639.878	677.313	656.133	588.7	529.271	640.87	651.564	685.991	635.808	600.141	656.915	622.847	730.253
P80560	Ptprn2	Receptor-type tyrosine-protein phosphatase N2 OS=Mus musculus GN=Ptprn2 PE=1 SV=2	648.488	649.067	655.376	653.492	606.593	621.81	595.933	629.624	650.265	617.239	629.122	634.049	681.91	713.975	648.419	655.06	676.331	740.881	632.494	626.649	637.412	681.847	611.654	546.513
Q62507	Coch	Cochlin OS=Mus musculus GN=Coch PE=1 SV=2	726.41	NA	798.56	399.264	427.638	386.282	NA	764.474	670.682	685.234	581.604	531.301	891.854	856.002	680.957	703.232	714.814	NA	NA	540.362	752.743	NA	494.302	702.743
Q9D394	Rufy3	Protein RUFY3 OS=Mus musculus GN=Rufy3 PE=1 SV=1	616.388	600.188	625.707	626.603	625.444	636.899	610.157	604.702	576.03	586.13	579.44	531.314	514.204	521.506	572.133	556.256	538.723	573.059	594.313	654.396	600.564	615.528	641.217	641.123
F6XCT0	Macf1	Microtubule-actin cross-linking factor 1 (Fragment) OS=Mus musculus GN=Macf1 PE=1 SV=1	540.021	629.844	534.983	630.715	621.332	575.931	653.157	612.246	617.29	635.524	625.345	553.412	564.236	590.756	605.837	633.728	603.006	629.53	612.952	631.68	625.318	619.329	632.838	620.977
P18654	Rps6ka3	Ribosomal protein S6 kinase alpha-3 OS=Mus musculus GN=Rps6ka3 PE=1 SV=2	588.614	569.21	605.798	623.816	608.636	617.455	599.641	601.869	639.141	619.424	633.432	653.765	610.928	613.369	656.247	627.985	621.48	658.027	552.51	640.898	621.445	606.149	591.672	581.854
Q91YJ3	Thyn1	Thymocyte nuclear protein 1 OS=Mus musculus GN=Thyn1 PE=1 SV=1	539.268	594.494	601.847	603.868	534.341	524.34	674.277	640.921	505.117	562.88	635.96	533.066	631.166	599.44	678.446	703.22	723.595	742.634	669.423	633.087	729.384	716.815	690.32	675.909
B7ZCU0	Abi1	Abl interactor 1 OS=Mus musculus GN=Abi1 PE=1 SV=1	592.714	591.205	577.922	572.933	569.629	580.143	623.072	640.078	647.12	658.112	699.077	654.594	643.247	623.407	634.765	652.081	622.782	635.969	608.767	657.069	626.019	622.787	619.089	566.211
P54822	Adsl	Adenylosuccinate lyase OS=Mus musculus GN=Adsl PE=1 SV=2	597.722	620.311	625.593	622.247	591.987	612.77	667.279	602.799	611.021	602.919	620.48	616.256	635.77	660.524	622.118	612.467	637.948	623.843	599.093	617.284	603.694	630.539	631.737	626.689
F6SHS0	Macf1	Microtubule-actin cross-linking factor 1 (Fragment) OS=Mus musculus GN=Macf1 PE=1 SV=1	540.779	629.928	534.983	630.715	621.332	577.317	651.269	611.953	618.126	635.524	625.345	554.187	565.234	592.246	607.091	633.728	604.295	631.06	612.983	631.68	625.318	620.528	633.199	621.453
Q9JHJ0	Tmod3	Tropomodulin-3 OS=Mus musculus GN=Tmod3 PE=1 SV=1	569.338	539.646	569.151	536.855	572.584	602.445	631.2	586.333	645.206	631.078	624.623	693.461	675.199	655.048	642.013	631.965	625.314	663.902	624.741	590.215	624.303	635.924	570.511	537.882
Q8K2T1	Nmral1	NmrA-like family domain-containing protein 1 OS=Mus musculus GN=Nmral1 PE=1 SV=1	614.943	640.268	679.793	645.347	631.918	608.12	650.338	587.93	611.466	587.934	647.159	569.878	656.206	773.436	699.301	514.438	720.475	678.456	617.798	680.936	644.929	719.425	639.049	643.336
G3X9N3	Pnmal2	MCG16539 OS=Mus musculus GN=Pnmal2 PE=1 SV=1	644.998	696.613	528.56	629.942	559.686	680.273	662.406	602.615	597.679	492.768	586.316	665.385	704.783	676.912	635.205	448.464	626.185	648.158	632.915	607.912	529.231	603.104	636.447	657.567
Q63739	Ptp4a1	Protein tyrosine phosphatase type IVA 1 OS=Mus musculus GN=Ptp4a1 PE=1 SV=1	568.469	570.413	592.271	576.071	609.396	561.465	688.114	623.726	634.634	626.722	696.634	607.688	633.414	612.534	631.631	586.518	591.594	605.013	639.417	599.428	611.786	602.859	646.97	513.658
A2ASZ8-5	Slc25a25	Isoform 5 of Calcium-binding mitochondrial carrier protein SCaMC-2 OS=Mus musculus GN=Slc25a25	623.68	593.332	607.491	566.461	594.609	610.172	620.222	620.039	632.959	657.002	620.526	563.344	556.892	579.021	583.492	625.53	547.975	578.411	628.132	660.548	663.076	649.632	629.638	567.797
Q01405	Sec23a	Protein transport protein Sec23A OS=Mus musculus GN=Sec23a PE=1 SV=2	592.65	631.902	648.828	645.069	602.25	606.598	619.23	622.251	614.668	637.809	579.823	594.461	605.449	622.502	601.338	619.635	631.254	623.125	623.585	587.666	628.187	599.067	594.317	639.005
P29758	Oat	Ornithine aminotransferase, mitochondrial OS=Mus musculus GN=Oat PE=1 SV=1	586.855	603.811	593.089	565.043	612.257	583.836	639.823	653.507	674.699	601.168	678.098	640.505	618.981	681.961	618.329	660.996	647.633	663.241	619.59	630.412	678.109	629.588	617.209	535.74
P46935	Nedd4	E3 ubiquitin-protein ligase NEDD4 OS=Mus musculus GN=Nedd4 PE=1 SV=3	661.056	669.705	682.618	632.568	663.161	642.983	618.358	631.171	613.63	595.691	627.4	617.797	649.534	630.173	613.737	620.625	652.778	609.564	640.685	601.097	605.979	601.219	618.83	654.33
P62889	Rpl30	60S ribosomal protein L30 OS=Mus musculus GN=Rpl30 PE=1 SV=2	725.6	885.654	572.685	771.912	574.428	578.792	499.798	570.777	454.175	564.774	472.516	605.298	521.529	456.395	550.938	582.424	544.692	380.309	615.7	574.057	470.949	436.388	579.854	884.27
Q8BH69	Sephs1	Selenide, water dikinase 1 OS=Mus musculus GN=Sephs1 PE=1 SV=1	627.52	654.747	581.942	586.267	603.455	686.91	654.44	639.945	666.929	610.505	550.247	545.445	628.524	677.849	629.414	556.725	650.803	628.187	675.398	615.551	559.86	651.085	617.404	664.244
P61358	Rpl27	60S ribosomal protein L27 OS=Mus musculus GN=Rpl27 PE=1 SV=2	564.582	560.533	602.379	541.157	588.286	556.81	608.787	604.161	648.229	623.319	622.37	685.093	618.424	611.323	624.545	618.1	579.562	620.37	622.828	600.293	626.341	617.232	584.23	507.567
Q8R1F6	Hid1	Protein HID1 OS=Mus musculus GN=Hid1 PE=1 SV=1	620.986	611.548	576.696	603.103	559.754	530.042	617.364	666.981	582.697	628.316	590.263	672.856	583.394	568.531	546.178	584.472	614.75	528.524	620.624	597.286	637.469	561.572	591.79	674.522
Q91VM3	Wdr45	WD repeat domain phosphoinositide-interacting protein 4 OS=Mus musculus GN=Wdr45 PE=1 SV=1	589.493	566.167	565.957	583.034	607.056	596.39	583.834	594.782	605.327	613.708	598.302	616.777	635.51	612.842	611.632	626.521	620.446	595.635	603.55	569.769	612.714	587.376	573.963	545.476
A0A075B5P3	Ighg2b	Immunoglobulin heavy constant gamma 2B (Fragment) OS=Mus musculus GN=Ighg2b PE=1 SV=1	829.177	911.454	318.527	246.873	569.61	769.547	600.854	419.511	687.146	597.563	860.462	598.83	1147.77	693.545	1487.16	805.992	639.145	797.513	975.667	893.44	2398.05	967.27	777.154	1105.76
S4R1M9	Osbpl10	Oxysterol-binding protein-related protein 10 OS=Mus musculus GN=Osbpl10 PE=1 SV=1	573.389	560.583	532.397	634.011	581.664	568.829	601.358	628.34	626.575	628.773	593.455	597.621	676.621	681.57	601.302	610.496	648.844	670.454	638.529	596.799	598.454	638.96	588.643	561.459
Q9D287	Bcas2	Pre-mRNA-splicing factor SPF27 OS=Mus musculus GN=Bcas2 PE=1 SV=1	597.222	625.432	603.971	605.113	570.45	600.537	618.187	589.222	557.077	584.252	539.325	519.738	473.053	565.835	548.993	556.289	511.239	589.29	616.976	622.396	533.883	579.161	589.96	589.075
Q80TA6	Mtmr12	Myotubularin-related protein 12 OS=Mus musculus GN=Mtmr12 PE=1 SV=2	567.671	603.261	655.058	603.429	688.946	675.709	661.412	603.09	731.665	821.036	561.98	666.359	721.01	693.9	701.18	731.317	547.082	684.013	612.665	572.085	525.522	589.792	536.61	472.845
O55135	Eif6	Eukaryotic translation initiation factor 6 OS=Mus musculus GN=Eif6 PE=1 SV=2	627.545	629.606	607.898	551.389	663.123	585.956	851.532	684.495	604.805	578.431	529.766	552.075	523.346	561.952	628.394	580.74	609.819	621.307	585.787	590.878	635.682	628.911	576.888	489.089
Q925T6	Grip1	Glutamate receptor-interacting protein 1 OS=Mus musculus GN=Grip1 PE=1 SV=1	582.553	659.081	569.145	575.673	611.818	664.985	749.733	655.239	652.145	659.35	560.014	554.108	634.794	583.198	600.585	621.928	627.154	699.705	657.867	622.869	671.974	680.472	635.046	555.738
P20029	Hspa5	78 kDa glucose-regulated protein OS=Mus musculus GN=Hspa5 PE=1 SV=3	587.112	580.659	586.248	589.768	591.091	566.575	608.141	612.97	652.351	641.307	654.223	684.06	616.888	637.925	542.219	586.723	578.665	640.244	653.631	602.895	649.427	663.462	611.58	608.967
A2ALK6	Epb41l4b	Band 4.1-like protein 4B OS=Mus musculus GN=Epb41l4b PE=1 SV=1	577.338	684.301	NA	610.512	NA	663.724	687.151	641.143	637.574	NA	684.716	794.293	701.129	708.437	699.609	NA	680.403	708.265	724.476	595.063	NA	608.931	658.074	571.542
G3UZV6	Map2	Microtubule-associated protein (Fragment) OS=Mus musculus GN=Map2 PE=1 SV=1	588.459	578.976	589.186	617.132	595.151	607.133	664.557	648.045	648.54	656.776	637.065	566.669	566.016	598.711	634.956	604.45	553.57	655.74	637.596	638.768	651.472	613.635	635.686	531.868
A2AQJ6	Tmem87a	Transmembrane protein 87A OS=Mus musculus GN=Tmem87a PE=1 SV=1	535.326	NA	581.523	619.037	535.608	516.447	NA	536.741	692.105	664.007	695.105	702.62	688.598	697.674	507.811	633.511	586.687	NA	NA	628.257	647.127	NA	713.554	677.218
Q7TNY3	Rcan1	Calcipressin 1 large isoform OS=Mus musculus GN=Rcan1 PE=1 SV=1	633.519	633.069	568.437	653.547	571.392	598.064	663.051	609.222	602.386	670.281	657.378	661.903	640.088	623.164	654.601	595.969	622.68	684.53	634.092	617.937	583.904	635.245	565.946	566.606
O35526	Stx1a	Syntaxin-1A OS=Mus musculus GN=Stx1a PE=1 SV=3	677.689	698.163	675.106	649.21	634.847	712.652	700.422	609.355	509.787	590.146	541.727	438.542	455.396	528.94	589.635	614.328	534.447	550.385	563.704	540.207	547.476	503.165	610.432	612.227
Q99L47	St13	Hsc70-interacting protein OS=Mus musculus GN=St13 PE=1 SV=1	592.66	563.523	603.658	607.008	642.139	593.58	626.592	610.001	599.274	627.356	660.026	594.728	518.707	594.939	622.507	580.559	519.662	575.744	607.831	631.59	639.289	619.145	634.186	575.199
Q9JKY7	Cyp2d22	Cytochrome P450 CYP2D22 OS=Mus musculus GN=Cyp2d22 PE=1 SV=1	661.902	581.051	607.999	605.543	613.463	617.735	618.121	515.488	580.765	588.834	596.025	654.18	719.57	782.388	666.106	681.683	652.622	686.057	566.467	563.624	647.223	716.498	588.773	682.707
Q3UN02	Lclat1	Lysocardiolipin acyltransferase 1 OS=Mus musculus GN=Lclat1 PE=1 SV=2	599.66	537.542	608.31	578.207	611.871	544.989	567.527	540.412	535.196	528.724	618.542	616.012	484.403	557.395	528.42	555.091	551.885	536.479	575.173	595.969	523.837	557.999	546.658	611.32
E9QN70	Lamb1	Laminin subunit beta-1 OS=Mus musculus GN=Lamb1 PE=1 SV=1	582.778	NA	NA	674.516	NA	565.103	NA	718.943	666.86	NA	640.551	599.77	616.516	552.216	458.455	NA	578.357	NA	NA	634.895	NA	NA	538.315	663.078
Q3TCH7	Cul4a	Cullin-4A OS=Mus musculus GN=Cul4a PE=1 SV=1	645.159	766.095	692.23	712.945	693.435	674.429	623.098	612.534	550.193	554.84	540.346	553.578	421.667	491.164	614.903	560.471	494.085	449.415	598.484	694.082	591.991	519.434	628.111	612.858
Q9Z0F7	Sncg	Gamma-synuclein OS=Mus musculus GN=Sncg PE=1 SV=1	621.784	587.375	595.431	526.015	615.228	611.804	588.53	604.031	697.42	570.819	633.378	579.206	566.737	677.56	542.336	595.987	588.555	596.473	513.768	662.984	582.784	679.823	595.717	535.618
Q9D7N9	Apmap	Adipocyte plasma membrane-associated protein OS=Mus musculus GN=Apmap PE=1 SV=1	579.518	577.132	612.849	598.255	628.519	636.294	622.038	624.658	639.856	672.53	628.938	609.544	621.938	646.722	662.447	725.951	620.09	647.573	601.382	613.191	643.791	608.693	608.972	533.355
Q99NE5	Rims1	Regulating synaptic membrane exocytosis protein 1 OS=Mus musculus GN=Rims1 PE=1 SV=2	679.439	655.127	680.271	631.811	677.776	682.498	687.598	630.61	621.64	673.543	619.121	565.405	520.605	555.986	633.281	653.767	544.797	591.63	607.574	640.198	623.824	579.25	651.769	609.092
A2AI21	Grin1	Glutamate receptor ionotropic, NMDA 1 OS=Mus musculus GN=Grin1 PE=1 SV=1	598.604	626.851	586.118	655.492	689.878	602.65	629.601	639.839	617.927	667.302	628.332	571.743	568.353	575.255	619.529	663.06	597.128	557.905	591.823	613.88	592.216	561.435	603.119	595.757
P62754	Rps6	40S ribosomal protein S6 OS=Mus musculus GN=Rps6 PE=1 SV=1	587.962	600.188	590.827	566.728	591.411	587.001	660.296	610.137	633.029	618.665	617.619	700.856	625.35	599.919	618.506	630.043	601.009	640.043	634.672	588.114	632.385	620.24	585.815	574.974
V9GX06	Gm11214	Uncharacterized protein (Fragment) OS=Mus musculus GN=Gm11214 PE=1 SV=1	709.356	715.055	741.402	649.628	684.564	644.774	534.5	589.618	522.987	552.479	532.093	602.223	659.704	623.105	520.554	509.955	611.812	564.089	724.332	621.733	566.033	587.285	580.307	841.297
P80316	Cct5	T-complex protein 1 subunit epsilon OS=Mus musculus GN=Cct5 PE=1 SV=1	634.76	611.759	611.907	595.596	607.981	620.898	597.933	619.137	631.795	619.982	689.149	669.55	595.095	594.728	584.749	587.019	579.648	615.991	649	611.315	605.891	626.956	642.743	598.064
Q3UFK1	Ccdc28a	Coiled-coil domain containing 28A OS=Mus musculus GN=Ccdc28a PE=1 SV=1	682.68	684.113	707.747	689.771	697.008	778.581	624.309	548.206	499.872	518.3	431.2	579.846	592.156	550.997	683.41	509.437	555.242	572.191	621.569	638.502	554.642	565.205	720.411	697.817
Q8R5A6-2	Tbc1d22a	Isoform 2 of TBC1 domain family member 22A OS=Mus musculus GN=Tbc1d22a	617.765	603.615	623.495	646.388	639.605	627.878	617.656	573.842	598.855	585.77	587.181	678.885	732.621	606.956	649.964	692.722	671.7	738.775	649.432	637.295	658.997	515.652	583.089	677.625
P34152	Ptk2	Focal adhesion kinase 1 OS=Mus musculus GN=Ptk2 PE=1 SV=3	609.026	635.152	595.895	671.616	648.491	614.687	620.539	650.237	584.328	623.96	610.562	622.079	598.2	532.775	594.449	603.663	638.327	608.044	629.503	592.259	620.529	578.408	605.481	633.453
Q61035	Hars	Histidine--tRNA ligase, cytoplasmic OS=Mus musculus GN=Hars PE=1 SV=2	685.008	603.15	649.373	621.564	630.846	601.155	564.023	593.687	656.573	566.648	573.866	534.708	621.427	576.614	603.071	593.944	659.492	579.293	524.544	579.41	596.828	575.811	643.792	651.493
Q8VHQ9	Acot11	Acyl-coenzyme A thioesterase 11 OS=Mus musculus GN=Acot11 PE=1 SV=1	689.668	650.976	667.581	646.58	631.37	640.964	615.163	577.943	631.932	616.203	710.857	557.338	664.165	694.9	707.462	639.716	632.432	634.673	616.074	649.911	620.088	660.025	625.137	635.115
E9PZJ8	Ascc3	Activating signal cointegrator 1 complex subunit 3 OS=Mus musculus GN=Ascc3 PE=1 SV=1	876.519	NA	676.166	NA	878.459	643.531	NA	575.839	523.584	747.037	NA	708	627.714	1003.64	604.714	701.257	583.437	NA	NA	NA	639.766	NA	491.448	779.144
Q8BGH7	Cdc42se2	CDC42 small effector protein 2 OS=Mus musculus GN=Cdc42se2 PE=1 SV=1	NA	623.195	558.876	545.133	516.921	557.809	515.059	NA	NA	481.549	610.286	593.234	NA	NA	601.138	556.952	NA	776.579	594.745	640.364	597.798	600.386	NA	NA
F6V3Y9	Atg2a	Autophagy-related protein 2 homolog A (Fragment) OS=Mus musculus GN=Atg2a PE=1 SV=1	602.594	693.701	NA	569.351	NA	688.036	658.384	635.66	708.799	NA	613.854	696.027	647.135	610.73	607.086	NA	622.963	551.903	654.94	536.35	NA	632.106	675.084	700.775
O88952	Lin7c	Protein lin-7 homolog C OS=Mus musculus GN=Lin7c PE=1 SV=2	597.494	631.84	626.361	576.701	602.232	622.515	655.382	622.154	613.539	611.53	598.839	666.653	680.085	642.771	637.535	620.975	637.631	742.51	646.05	579.693	645.193	708.932	629.717	632.226
F6Y616	Paip1	Polyadenylate-binding protein-interacting protein 1 OS=Mus musculus GN=Paip1 PE=1 SV=2	560.923	585.681	614.495	649.122	629.46	626.519	634.799	600.276	548.961	632.17	684.163	655.566	536.483	545.422	640.16	629.702	586.923	635.537	603.965	635.419	630.156	605.934	644.262	529.933
Q99N50-2	Sytl2	Isoform 2 of Synaptotagmin-like protein 2 OS=Mus musculus GN=Sytl2	639.894	537.624	631.153	563.822	582.324	644.029	546.285	609.315	621.404	533.761	628.619	606.004	742.05	656.213	670.4	580.332	622.309	614.37	619.353	611.854	552.779	549.807	591.616	582.214
E9QAS5	Chd4	Chromodomain-helicase-DNA-binding protein 4 OS=Mus musculus GN=Chd4 PE=1 SV=1	608.133	758.737	604.755	664.412	593.976	640.916	662.108	703.329	699.722	637.71	584.694	543.169	611.394	625.395	607.225	671.898	690.161	704.743	708.294	653.347	629.726	628.918	627.418	650.488
Q9Z2Y3	Homer1	Homer protein homolog 1 OS=Mus musculus GN=Homer1 PE=1 SV=2	626.378	594.524	631.334	635.073	652	672.202	582.437	601.861	531.671	596.72	572.967	594.194	538.913	507.113	584.752	572.941	566.053	555.507	600.339	585.834	574.238	541.592	586.334	641.68
O09061	Psmb1	Proteasome subunit beta type-1 OS=Mus musculus GN=Psmb1 PE=1 SV=1	598.161	579.691	573.636	554.658	612.683	608.51	637.148	661.227	664.586	611.537	612.394	617.321	638.142	588.759	656.154	605.028	641.415	640.152	568.394	616.133	663.973	622.541	607.267	623.492
Q8CFV9	Rfk	Riboflavin kinase OS=Mus musculus GN=Rfk PE=1 SV=2	615.409	561.685	616.482	523.898	556.072	566.342	635.254	717.582	689.017	631.738	620.318	658.853	714.505	653.961	580.932	672.552	674.546	612.671	598.045	618.419	684.848	635.092	602.087	542.419
Q9DC53	Cpne8	Copine-8 OS=Mus musculus GN=Cpne8 PE=2 SV=3	619.752	667.985	637.264	658.91	678.475	637.836	636.547	623.361	589.169	571.847	596.529	621.068	656.961	611.874	637.67	611.797	639.194	629.572	660.248	553.362	584.129	581.554	570.759	634.706
P54728	Rad23b	UV excision repair protein RAD23 homolog B OS=Mus musculus GN=Rad23b PE=1 SV=2	695.96	650.81	661.635	604.045	646.539	679.986	538.121	535.827	507.661	529.235	547.344	571.833	384.126	502.406	549.653	478.557	442.327	434.545	563.66	613.278	528.94	500.629	574.345	648.388
Q9D8W5	Psmd12	26S proteasome non-ATPase regulatory subunit 12 OS=Mus musculus GN=Psmd12 PE=1 SV=4	660.073	693.502	667.422	699.242	649.409	651.668	607.177	647.976	561.8	603.907	534.419	583.497	554.456	547.339	541.861	604.453	620.195	478.652	562.351	575.199	619.546	507.561	634.655	695.064
Q99PT1	Arhgdia	Rho GDP-dissociation inhibitor 1 OS=Mus musculus GN=Arhgdia PE=1 SV=3	594.132	616.278	594.254	600.102	589.648	590.997	613.385	608.178	621.84	601.326	640.513	590.325	653.79	635.749	593.731	600.947	606.894	656.971	629.605	618.67	614.425	620.635	615.556	579.801
Q3UCQ1	Foxk2	Forkhead box protein K2 OS=Mus musculus GN=Foxk2 PE=1 SV=3	469.121	607.479	437.817	708.105	590.206	495.686	712.202	549.906	727.569	694.345	743.943	918.279	719.876	861.499	686.399	700.342	577.179	622.469	548.501	662.509	617.002	662.648	639.315	494.243
Q921W4	Cryzl1	Quinone oxidoreductase-like protein 1 OS=Mus musculus GN=Cryzl1 PE=1 SV=1	758.89	634.685	672.232	678.122	649.204	770.121	650.855	592.31	628.828	583.626	502.31	350.731	378.111	564.29	552.028	585.457	440.786	514.743	591.949	637.741	594.175	619.124	669.05	628.363
Q9D1D4	Tmed10	Transmembrane emp24 domain-containing protein 10 OS=Mus musculus GN=Tmed10 PE=1 SV=1	618.547	692.128	686.779	636.609	599.142	585.743	606.996	644.394	650.694	631.932	667.89	723.382	645.606	636.838	623.274	567.602	632.008	584.393	703.929	641.84	655.738	654.876	641.127	723.386
Q7TNS2	Minos1	MICOS complex subunit Mic10 OS=Mus musculus GN=Minos1 PE=1 SV=1	666.75	696.098	714.43	704.967	644.41	763.878	437.364	391.216	238.524	322.201	380.336	197.82	197.684	130.655	352.727	243.719	260.014	237.413	375.419	536.271	366.386	251.75	510.544	648.077
P63087-2	Ppp1cc	Isoform Gamma-2 of Serine/threonine-protein phosphatase PP1-gamma catalytic subunit OS=Mus musculus GN=Ppp1cc	638.922	646.045	630.584	645.361	639.736	621.328	574.327	615.418	590.269	617.044	616.97	658.959	597.937	619.944	613.817	639.358	638.123	584.408	626.782	602.894	612.881	562.428	603.49	616.885
Q61739	Itga6	Integrin alpha-6 OS=Mus musculus GN=Itga6 PE=1 SV=3	554.874	529.819	539.083	688.885	681.529	570.903	576.318	605.828	676.925	697.294	703.8	696.814	778.169	955.03	578.588	646.073	638.858	672.089	621.508	609.625	633.454	638.431	597.592	619.028
A0A0G2JGQ4	Nub1	NEDD8 ultimate buster 1 OS=Mus musculus GN=Nub1 PE=1 SV=1	730.027	699.521	758.041	675.282	751.578	614.578	606.685	606.143	546.896	647.146	680.351	695.617	847.504	652.994	658.871	668.06	696.679	621.73	631.29	613.902	706.881	659.61	582.865	626.838
F6U3S2	Mfsd6	Major facilitator superfamily domain-containing protein 6 (Fragment) OS=Mus musculus GN=Mfsd6 PE=1 SV=1	626.456	570.26	596.237	605.859	601.332	620.072	644.762	642.294	743.576	641.558	724.915	700.723	710.479	789.835	708.111	632.004	721.027	724.444	627.672	604.816	650.095	697.714	589.289	690.365
Q9DBR1	Xrn2	5'-3' exoribonuclease 2 OS=Mus musculus GN=Xrn2 PE=1 SV=1	549.954	587.845	610.459	596.775	608.219	675.217	590.617	633.399	653.363	583.046	649.267	595.842	799.938	650.714	654.637	565.743	636.023	629.655	587.737	638.599	586.828	588.338	603.312	570.813
Q9D2N4-2	Dtna	Isoform 2 of Dystrobrevin alpha OS=Mus musculus GN=Dtna	622.762	614.852	629.678	610.832	632.555	598.506	607.762	606.765	612.282	603.097	569.956	626.73	624.84	626.416	586.928	615.654	617.398	647.976	613.635	583.075	606.007	622.349	644.466	649.653
J3QNK8	Abi1	Abl interactor 1 OS=Mus musculus GN=Abi1 PE=1 SV=1	587.115	592.287	580.646	571.652	569.077	581.152	621.801	639.665	647.12	656.792	695.194	660.486	637.167	623.407	634.096	653.006	618.012	633.849	608.696	657.616	628.289	620.73	619.089	560.03
O35963	Rab33b	Ras-related protein Rab-33B OS=Mus musculus GN=Rab33b PE=1 SV=1	576.04	620.568	579.276	581.553	577.221	577.619	604.064	612.694	652.549	628.075	605.949	660.515	624.222	657.35	592.653	646.311	626.897	635.458	598.362	616.375	615.47	583.323	611.66	542.447
Q91XE8	Tmem205	Transmembrane protein 205 OS=Mus musculus GN=Tmem205 PE=1 SV=1	546.066	NA	NA	629.522	NA	577.406	NA	606.019	NA	NA	719.571	699.06	629.206	NA	690.299	NA	615.762	NA	NA	613.408	NA	NA	NA	486.396
H3BLK8	Zfhx4	Zinc finger homeobox protein 4 OS=Mus musculus GN=Zfhx4 PE=1 SV=1	NA	558.046	NA	NA	NA	NA	753.032	NA	639.777	NA	NA	NA	NA	970.397	NA	NA	NA	587.632	906.376	NA	NA	766.292	578.63	NA
Q99K67	Aass	Alpha-aminoadipic semialdehyde synthase, mitochondrial OS=Mus musculus GN=Aass PE=1 SV=1	644.425	703.878	602.329	544.826	697.356	608.814	586.61	704.191	593.77	653.276	721.013	733.261	787.765	919.905	572.932	738.365	631.098	654.386	570.383	755.861	656.517	834.33	576.196	576.687
P99029	Prdx5	Peroxiredoxin-5, mitochondrial OS=Mus musculus GN=Prdx5 PE=1 SV=2	577.33	573.74	595.904	553.854	559.134	571.601	577.909	604.614	651.391	604.962	626.558	651.409	664.329	669.961	615.866	585.22	605.095	673.781	647.026	629.313	653.456	645.57	607.171	583.195
Q6A0A9	FAM120A	Constitutive coactivator of PPAR-gamma-like protein 1 OS=Mus musculus GN=FAM120A PE=1 SV=2	611.628	616.505	639.921	649.241	631.87	607.967	621.365	621.568	643.857	662.24	660.302	659.658	595.444	639.046	639.522	653.056	616.583	628.6	610.159	625.978	644.226	607.59	608.194	589.237
Q9JHE7	Tssc4	Protein TSSC4 OS=Mus musculus GN=Tssc4 PE=1 SV=1	647.81	587.535	776.789	600.551	717.273	706.979	626.129	512.804	313.492	486.44	732.837	503.58	238.942	196.202	545.275	444.454	345.927	436.339	507.471	623.971	509.628	445.228	801.2	579.832
O88622	Parg	Poly(ADP-ribose) glycohydrolase OS=Mus musculus GN=Parg PE=1 SV=2	NA	620.982	522.347	620.171	685.523	626.045	661.253	NA	671.539	495.147	605.415	414.046	NA	650.238	579.606	547.92	NA	523.898	638.518	587.099	520.286	580.043	681.825	NA
Q8CDV7	Entpd1	Ectonucleoside triphosphate diphosphohydrolase 1 OS=Mus musculus GN=Entpd1 PE=1 SV=1	573.829	565.239	556.122	605.628	604.628	523.499	599.724	551.447	684.558	656.356	643.046	719.507	693.657	658.992	576.899	646.183	613.644	682.501	682.252	608.963	633.797	651.375	588.375	480.662
Q68EF0	Rab3ip	Rab-3A-interacting protein OS=Mus musculus GN=Rab3ip PE=1 SV=1	633.629	659.73	NA	683.416	NA	533.123	567.265	540.572	519.343	NA	326.395	614.984	580.015	568.987	495.359	NA	612.579	519.096	639.633	416.445	NA	548.625	570.639	622.342
Q9CQ62	Decr1	2,4-dienoyl-CoA reductase, mitochondrial OS=Mus musculus GN=Decr1 PE=1 SV=1	577.636	525.413	662.997	494.469	604.389	608.501	606.935	641.536	591.682	624.446	655.157	595.651	645.985	693.175	642.491	681.715	673.664	686.792	623.747	622.339	686.322	651.205	574.427	570.995
Q8BHE8	Maip1	m-AAA protease-interacting protein 1, mitochondrial OS=Mus musculus GN=Maip1 PE=1 SV=1	610.873	600.06	663.395	716.518	675.668	582.07	660.976	612.256	602.834	617.379	734.542	667.685	698.137	661.451	651.461	666.524	693.325	720.529	669.092	624.471	582.203	629.602	594.058	578.693
Q3UHD6	Snx27	Sorting nexin-27 OS=Mus musculus GN=Snx27 PE=1 SV=2	609.236	584.853	607.881	607.472	624.562	610.12	600.789	630.117	629.476	626.451	656.029	645.453	658.626	634.135	649.17	636.613	641.902	574.552	580.426	629.68	632.791	606.002	606.949	634.702
Q6NS52	Dgkb	Diacylglycerol kinase beta OS=Mus musculus GN=Dgkb PE=1 SV=2	635.514	602.557	624.549	672.509	639.097	628.411	584.029	629.988	602.248	633.179	651.012	668.488	600.612	631.659	641.415	640.57	631.047	643.787	590.163	575.293	591.4	545.525	643.885	611.014
Q99LU0	Chmp1b1	Charged multivesicular body protein 1b-1 OS=Mus musculus GN=Chmp1b1 PE=1 SV=1	605.561	NA	NA	659.401	NA	689.899	NA	649.166	551.126	NA	326.974	238.56	622.826	584.198	480.382	NA	616.486	NA	NA	593.11	NA	NA	577.429	510.269
Q501J7-3	Phactr4	Isoform 3 of Phosphatase and actin regulator 4 OS=Mus musculus GN=Phactr4	559.109	526.905	581.151	616.82	632.183	644.88	647.772	607.31	709.658	662.644	689.584	587.267	430.979	555.984	562.768	617.022	458.56	604.967	569.952	751.148	615.656	620.66	693.662	501.325
Q8JZU2	Slc25a1	Tricarboxylate transport protein, mitochondrial OS=Mus musculus GN=Slc25a1 PE=1 SV=1	679.334	626.442	806.966	698.844	679.491	642.979	642.402	595.397	512.199	491.529	563.115	575.422	402.111	452.504	616.328	520.181	521.696	509.336	604.58	640.787	533.646	580.965	671.769	635.023
E9QAX2	Myo18a	Unconventional myosin-XVIIIa OS=Mus musculus GN=Myo18a PE=1 SV=1	603.878	586.934	628.927	624.039	633.543	608.559	632.14	615.766	628.441	683.167	639.146	611.843	567.117	585.872	589.416	661.856	593.401	620.916	613.464	638.68	639.843	623.145	642.836	614.991
Q3UYK3	Tbc1d9	TBC1 domain family member 9 OS=Mus musculus GN=Tbc1d9 PE=2 SV=2	693.893	NA	NA	NA	NA	581.704	NA	547.752	NA	NA	NA	735.831	579.56	NA	536.177	NA	624.744	NA	NA	NA	NA	NA	NA	697.019
P24549	Aldh1a1	Retinal dehydrogenase 1 OS=Mus musculus GN=Aldh1a1 PE=1 SV=5	562.961	586.885	577.794	549.052	481.647	536.612	608.169	597.884	634.55	667.057	621.767	618.992	664.477	673.006	672.877	582.298	643.597	633.864	531.468	620.278	626.876	639.051	688.369	646.851
Q5H8C4	Vps13a	Vacuolar protein sorting-associated protein 13A OS=Mus musculus GN=Vps13a PE=1 SV=1	600.194	586.842	600.81	706.062	624.398	666.951	594.899	627.186	574.944	638.874	612.279	603.819	622.742	593.385	622.494	623.658	604.58	599.579	589.663	601.72	609.581	568.721	573.601	608.18
Q9DB77	Uqcrc2	Cytochrome b-c1 complex subunit 2, mitochondrial OS=Mus musculus GN=Uqcrc2 PE=1 SV=1	621.638	658.071	645.019	630.938	629.181	630.017	709.743	670.891	635.897	643.816	666.058	626.577	536.363	605.152	653.714	625.798	577.696	662.372	678.858	666.344	666.292	631.177	656.675	576.881
P97742	Cpt1a	Carnitine O-palmitoyltransferase 1, liver isoform OS=Mus musculus GN=Cpt1a PE=1 SV=4	552.431	669.983	612.393	612.153	595.496	577.696	608.7	596.727	635.356	636.906	657.679	682.552	717.995	733.621	662.832	605.172	673.254	645.649	572.601	577.4	619.314	643.154	634.79	615.979
Q99KV1	Dnajb11	DnaJ homolog subfamily B member 11 OS=Mus musculus GN=Dnajb11 PE=1 SV=1	616.209	597.799	521.431	579.517	546.048	598.324	556.803	603.636	681.777	658.668	750.551	653.459	576.694	620.363	633.638	599.876	579.256	633.513	673.941	569.766	638.799	606.147	570.713	650.561
A2A8U2	Tmem201	Transmembrane protein 201 OS=Mus musculus GN=Tmem201 PE=1 SV=1	557.105	597.203	594.27	560.764	494.862	562.025	495.118	583.078	NA	608.639	584.988	629.698	460.864	NA	581.559	667.815	541.498	719.627	645.598	557.182	494.987	602.285	NA	571.769
E9PX89	Bola3	BolA-like protein 3 OS=Mus musculus GN=Bola3 PE=1 SV=1	584.593	593.603	672.216	622.099	615.894	578.261	643.894	654.292	607.959	650.234	636.628	530.386	565.947	514.614	602.689	713.12	570.216	560.891	633.297	635.344	635.009	540.823	640.482	507.914
Q9CZX0-2	Elp3	Isoform 2 of Elongator complex protein 3 OS=Mus musculus GN=Elp3	547.895	651.252	584.779	646.25	635.905	604.635	662.498	596.656	650.464	657.642	626.742	611.624	741.631	767.594	615.704	661.794	681.411	659.644	659.292	622.647	614.77	638.048	613.616	595.885
Q3UHQ6	Dopey2	Protein dopey-2 OS=Mus musculus GN=Dopey2 PE=1 SV=3	NA	729.04	NA	640.333	NA	729.814	604.662	NA	513.497	NA	393.186	631.026	NA	635.798	634.75	NA	NA	603.557	533.539	554.539	NA	566.905	468.911	NA
Q9D0E1	Hnrnpm	Heterogeneous nuclear ribonucleoprotein M OS=Mus musculus GN=Hnrnpm PE=1 SV=3	621.282	613.139	616.123	596.892	636.968	629.289	609.272	633.556	620.515	632.432	563.766	583.461	640.461	647.956	670.44	595.479	643.268	608.811	582.937	588.041	641.98	607.191	623.886	627.636
Q60738	Slc30a1	Zinc transporter 1 OS=Mus musculus GN=Slc30a1 PE=1 SV=1	685.828	640.766	675.326	695.263	673.788	632.542	506.261	571.029	557.627	625.914	558.363	593.607	651.308	643.04	446.987	556.525	633.125	656.291	654.811	579.351	633.855	646.519	587.249	670.385
Q8K1M6	Dnm1l	Dynamin-1-like protein OS=Mus musculus GN=Dnm1l PE=1 SV=2	620.896	652.955	624.099	628.727	630.474	629.512	616.211	633.233	626.868	633.387	640.323	592.764	533.429	578.255	622.53	599.372	558.851	569.716	595.718	632.157	601.58	619.146	621.815	577.83
Q9QYM9	Tmeff2	Tomoregulin-2 OS=Mus musculus GN=Tmeff2 PE=2 SV=1	652.965	648.276	643.713	536.78	591.301	514.05	578.477	606.787	528.316	516.951	445.03	539.321	583.865	490.715	667.423	598.173	542.089	770.364	600.88	497.197	476.554	727.442	579.156	489.347
P83741-3	Wnk1	Isoform 3 of Serine/threonine-protein kinase WNK1 OS=Mus musculus GN=Wnk1	629.732	584.148	594.858	602.429	579.698	617.756	660.6	623.227	590.455	604.881	534.154	518.545	456.252	546.692	629.989	594.649	543.187	538.296	577.689	611.119	596.706	583.658	644.126	607.373
Q9CWW7	Cxxc1	CXXC-type zinc finger protein 1 OS=Mus musculus GN=Cxxc1 PE=2 SV=1	NA	588.906	NA	586.691	NA	614.267	639.023	NA	NA	NA	699.67	668.991	NA	NA	550.137	NA	NA	887.155	605.065	631.308	NA	783.129	NA	NA
O70400	Pdlim1	PDZ and LIM domain protein 1 OS=Mus musculus GN=Pdlim1 PE=1 SV=4	640.106	599.297	511.144	558.026	518.025	600.711	633.908	630.428	689.694	642.262	637.919	666.243	614.678	663.588	608.307	597.346	692.661	697.944	694.489	605.948	616.222	703.526	650.265	619.479
D3Z4E2	Nrn1	Neuritin OS=Mus musculus GN=Nrn1 PE=1 SV=1	640.821	541.984	551.448	642.55	608.155	679.406	558.575	580.411	635.533	614.371	590.324	582.325	694.883	635.303	699.587	636.335	672.483	707.321	614.841	555.498	606.872	584.864	551.076	527.153
Q3TZ02	Cyth1	Cytohesin-1 OS=Mus musculus GN=Cyth1 PE=1 SV=1	623.736	575.328	631.328	565.146	608.687	615.134	618.338	618.74	671.417	642.218	609.024	623.469	691.969	650.118	633.597	676.374	645.756	660.37	643.13	619.869	648.759	620.358	592.038	617.475
V9GWW6	Mlip	Muscular LMNA-interacting protein OS=Mus musculus GN=Mlip PE=1 SV=1	596.261	525.074	631.059	598.263	629.61	679.882	676.867	616.689	652.36	660.982	650.318	777.717	631.886	675.669	691.48	681.361	601.038	639.821	601.876	604.203	630.312	585.019	667.215	564.322
Q8VI24	Satb2	DNA-binding protein SATB2 OS=Mus musculus GN=Satb2 PE=1 SV=1	NA	582.17	NA	662.195	NA	493.593	687.945	NA	573.599	NA	504.455	169.402	NA	567.804	304.952	NA	NA	552.833	521.715	628.621	NA	729.021	575.897	NA
Q9R1L5	Mast1	Microtubule-associated serine/threonine-protein kinase 1 OS=Mus musculus GN=Mast1 PE=1 SV=3	581.347	565.843	626.34	602.022	628.953	608.444	697.691	631.386	626.948	663.431	683.691	612.023	654.667	603.946	626.063	619.679	649.198	678.57	560.564	612.024	588.801	583.643	616.366	545.9
Q9Z2P8	Vamp5	Vesicle-associated membrane protein 5 OS=Mus musculus GN=Vamp5 PE=1 SV=1	707.971	561.544	568.147	NA	579.844	NA	480.89	601.168	NA	535.773	NA	NA	844.485	NA	NA	583.588	692.256	589.057	675.815	NA	646.924	688.78	NA	672.459
P09671	Sod2	Superoxide dismutase [Mn], mitochondrial OS=Mus musculus GN=Sod2 PE=1 SV=3	570.561	561.24	579.521	578.743	635.62	562.082	603.219	620.237	643.081	603.06	610.07	602.118	569.862	609.199	571.105	570.747	554.998	603.79	627.074	609.783	574.319	584.039	612.294	537.177
E9Q652	Rgs12	Regulator of G-protein-signaling 12 OS=Mus musculus GN=Rgs12 PE=1 SV=1	572.375	603.193	613.54	557.679	610.308	617.718	603.316	595.682	652.557	613.25	662.583	596.889	749.713	683.177	635.92	629.987	684.914	628.919	609.102	655.058	594.607	628.908	603.366	655.965
Q8VCW8	Acsf2	Acyl-CoA synthetase family member 2, mitochondrial OS=Mus musculus GN=Acsf2 PE=1 SV=1	599.616	603.803	642.683	624.705	609.115	613.723	605.839	561.881	606.058	601.961	612.99	634.353	661.204	631.327	633.978	626.112	650.364	685.662	551.41	585.15	620.942	667.543	577.118	624.871
Q8K124	Plekho2	Pleckstrin homology domain-containing family O member 2 OS=Mus musculus GN=Plekho2 PE=1 SV=1	538.17	NA	NA	883.867	NA	598.067	NA	681.477	NA	NA	1156.52	692.411	808.393	NA	702.649	NA	634.608	NA	NA	602.804	NA	NA	NA	629.643
P14685	Psmd3	26S proteasome non-ATPase regulatory subunit 3 OS=Mus musculus GN=Psmd3 PE=1 SV=3	602.531	639	609.01	651.384	617.6	611.273	591.168	620.259	566.888	612.007	587.831	614.697	583.034	565.534	564.282	613.433	578.207	515.419	589.225	600.603	591.476	530.98	626.555	651.46
Q3TC46	Patl1	Protein PAT1 homolog 1 OS=Mus musculus GN=Patl1 PE=1 SV=2	NA	NA	NA	NA	NA	534.419	NA	NA	665.881	NA	NA	711.814	NA	716.137	672.08	NA	NA	NA	NA	NA	NA	NA	583.938	NA
Q8BUM6	Fam163b	Protein FAM163B OS=Mus musculus GN=Fam163b PE=1 SV=1	718.534	682.612	619.718	548.064	597.842	564.331	593.409	614.276	716.231	631.809	581.541	691.01	792.662	708.067	603.626	601.843	705.512	744.387	726.033	552.5	580.644	661.643	635.146	725.224
Q9WV85	Nme3	Nucleoside diphosphate kinase 3 OS=Mus musculus GN=Nme3 PE=1 SV=3	572.406	554.71	584.345	618.359	641.095	543.77	681.52	627.921	667.506	637.546	664.131	655.262	610.039	602.009	605.371	638.998	588.746	670.483	569.762	623.639	624.997	662.733	624.08	534.802
Q9ERR1	Ndel1	Nuclear distribution protein nudE-like 1 OS=Mus musculus GN=Ndel1 PE=1 SV=2	654.352	640.698	588.792	751.662	655.005	799.556	666.037	554.43	636.55	591.828	511.278	397.503	459.588	581.529	549.128	649.408	542.534	663.908	659.078	630.729	621.902	581.739	600.105	716.597
Q9JLI8	Sart3	Squamous cell carcinoma antigen recognized by T-cells 3 OS=Mus musculus GN=Sart3 PE=1 SV=1	619.299	579.011	496.737	544.809	459.18	594.002	571.682	618.516	644.956	549.171	605.632	600.159	687.619	650.88	605.732	547.141	645.762	649.571	578.606	553.369	493.72	615.046	594.327	596.438
P97370	Atp1b3	Sodium/potassium-transporting ATPase subunit beta-3 OS=Mus musculus GN=Atp1b3 PE=1 SV=1	633.323	623.782	609.411	620.754	598.672	620.802	649.738	569.696	609.773	595.079	535.227	519.231	566.761	615.519	587.186	636.934	581.775	613.937	641.998	642.74	640.604	654.845	607.167	579.641
Q80XQ2	Tbc1d5	TBC1 domain family member 5 OS=Mus musculus GN=Tbc1d5 PE=1 SV=2	529.507	561.951	581.496	577.409	562.383	570.058	652.303	574.513	658.012	615.091	630.892	478.764	686.973	766.07	605.509	671.77	656.411	615.572	571.349	589.632	601.628	575.953	596.45	578.086
Q6NS52-2	Dgkb	Isoform 2 of Diacylglycerol kinase beta OS=Mus musculus GN=Dgkb	631.209	607.199	621.253	677.502	629.877	630.708	581.555	631.103	614.151	643.695	659.06	671.903	605.46	646.611	642.738	645.95	635.881	638.501	596.824	573.473	600.797	555.184	644.326	594.52
Q3ZB57	Gab2	GRB2-associated-binding protein 2 OS=Mus musculus GN=Gab2 PE=1 SV=1	NA	NA	971.413	NA	646.667	NA	NA	NA	502.06	690.811	NA	NA	NA	372.832	NA	524.85	NA	NA	NA	NA	647.256	NA	653.844	NA
Q91ZP9	Necab2	N-terminal EF-hand calcium-binding protein 2 OS=Mus musculus GN=Necab2 PE=1 SV=1	609.477	606.173	575.037	629.335	583.853	659.991	605.99	636.868	654.42	632.242	600.507	594.288	622.642	631.958	574.492	651.826	613.942	645.496	614.035	592.249	586.822	613.676	589.85	558.787
Q9D6F9	Tubb4a	Tubulin beta-4A chain OS=Mus musculus GN=Tubb4a PE=1 SV=3	602.429	604.582	609.203	609.759	613.092	610.233	607.429	606.839	624.428	604.214	615.805	649.531	663.459	682.649	626.469	624.887	624.339	650.542	657.318	626.777	628.447	636.517	611.349	646.39
Q8BKE9	Ift74	Intraflagellar transport protein 74 homolog OS=Mus musculus GN=Ift74 PE=1 SV=2	557.788	586.147	538.821	612.348	575.018	660.828	857.409	640.392	703.912	514.841	643.325	430.48	233.484	523.678	704.22	509.111	457.9	639.387	618.792	616.482	554.246	567.523	783.621	447.839
Q8C163	Exog	Nuclease EXOG, mitochondrial OS=Mus musculus GN=Exog PE=1 SV=1	616.543	654.41	623.728	627.411	607.116	613.514	667.737	615.079	626.292	632.057	635.181	683.583	611.767	655.334	601.378	569.014	592.626	651.767	690.634	657.081	630.235	626.176	629.428	670.873
Q9D9I4	Tbc1d20	TBC1 domain family member 20 OS=Mus musculus GN=Tbc1d20 PE=1 SV=1	660.659	670.517	624.754	591.337	591.005	NA	675.849	697.581	729.968	600.14	733.994	NA	689.385	576.879	NA	639.135	566.981	819.792	523.119	619.362	575.416	666.969	622.102	549.931
Q9R022	Dnajc12	DnaJ homolog subfamily C member 12 OS=Mus musculus GN=Dnajc12 PE=1 SV=1	NA	NA	NA	668.482	NA	738.385	NA	NA	NA	NA	512.115	294.75	NA	NA	609.087	NA	NA	NA	NA	701.637	NA	NA	NA	NA
P28867	Prkcd	Protein kinase C delta type OS=Mus musculus GN=Prkcd PE=1 SV=3	614.991	588.296	596.521	613.905	608.228	613.722	628.94	599.464	554.848	588.598	556.405	582.219	604.571	593.664	619.011	651.47	606.988	598.936	637.467	575.91	597.095	582.922	646.849	643.774
A0A0R4J083	Acadl	Long-chain-specific acyl-CoA dehydrogenase, mitochondrial OS=Mus musculus GN=Acadl PE=1 SV=1	599.175	648.847	686.581	626.976	690.648	634.2	667.422	639.205	643.002	598.11	655.634	580.289	572.473	649.525	655.964	648.315	628.417	629.228	572.152	612.245	653.77	671.204	669.762	591.975
Q6ZWM4	Lsm8	U6 snRNA-associated Sm-like protein LSm8 OS=Mus musculus GN=Lsm8 PE=1 SV=3	679.846	705.518	658.033	717.273	656.708	669.719	580.528	621.192	536.288	530.037	543.43	492.898	444.508	534.179	555.705	629.652	540.755	464.965	536.76	585.585	545.668	534.229	592.889	615.667
P84091	Ap2m1	AP-2 complex subunit mu OS=Mus musculus GN=Ap2m1 PE=1 SV=1	616.58	706.236	592.423	648.162	616.169	598.713	611.027	621.396	543.378	592.5	534.631	661.086	610.981	588.968	594.594	594.577	590.54	562.705	647.786	600.949	580.181	566.903	618.282	698.438
P97355	Sms	Spermine synthase OS=Mus musculus GN=Sms PE=1 SV=1	606.72	632.993	664.188	595.607	646.448	630.197	575.87	545.482	505.325	627.432	532.982	601.524	576.168	538.961	559.688	581.348	550.512	601.192	606.036	603.238	602.543	570.986	622.228	585.275
A0A0G2JFT8	Rufy3	Protein RUFY3 OS=Mus musculus GN=Rufy3 PE=1 SV=1	612.574	611.47	635.389	632.96	633.281	636.337	614.857	606.313	569.506	581.507	585.937	509.041	509.037	516.421	570.542	552.559	529.061	564.324	588.318	658.179	604.742	611.588	648.558	636.178
Q9Z2I0	Letm1	LETM1 and EF-hand domain-containing protein 1, mitochondrial OS=Mus musculus GN=Letm1 PE=1 SV=1	565.897	583.03	587.711	583.594	600.355	582.112	627.751	624.533	644.574	646.286	663.777	710.004	682.341	665.629	639.273	617.3	633.558	658.938	622.984	594.871	643.163	606.822	612.564	603.737
Q80UJ7	Rab3gap1	Rab3 GTPase-activating protein catalytic subunit OS=Mus musculus GN=Rab3gap1 PE=1 SV=4	620.764	619.761	637.472	600.052	614.724	596.034	628.055	611.567	615.806	631.331	629.09	624.843	563.855	636.928	631.977	608.07	573.813	593.271	600.052	627.887	616.419	616.799	647.592	647.746
P08775	Polr2a	DNA-directed RNA polymerase II subunit RPB1 OS=Mus musculus GN=Polr2a PE=1 SV=3	538.371	584.48	584.678	567.249	547.965	645.019	622.804	589.405	652.336	640.023	699.317	743.093	601.006	739.684	736.526	650.851	573.561	699.714	634.732	569.307	616.458	643.116	743.384	524.289
Q61206	Pafah1b2	Platelet-activating factor acetylhydrolase IB subunit beta OS=Mus musculus GN=Pafah1b2 PE=1 SV=2	678.977	718.712	719.785	761.327	703.302	717.039	756.242	655.396	528.385	600.684	725.695	498.103	435.501	470.122	637.228	616.667	567.434	543.053	679.062	740.151	640.42	606.859	693.407	565.666
Q9CQN7	Mrpl41	39S ribosomal protein L41, mitochondrial OS=Mus musculus GN=Mrpl41 PE=1 SV=1	607.873	536.555	627.081	555.406	586.106	598.19	651.036	633.365	644.57	598.072	650.626	606.986	701.758	708.442	667.451	641.099	634.36	671.715	608.345	663.511	655.416	639.164	618.523	572.599
P41234	Abca2	ATP-binding cassette sub-family A member 2 OS=Mus musculus GN=Abca2 PE=1 SV=4	617.854	605.154	575.672	584.116	664.92	587.029	702.538	642.165	668.123	676.126	673.329	639.272	752.781	656.159	595.858	722.839	650.085	725.556	650.489	592.491	648.529	798.776	636.477	623.89
P0C0A3	Chmp6	Charged multivesicular body protein 6 OS=Mus musculus GN=Chmp6 PE=1 SV=2	591.572	581.659	590.942	572.169	589.847	542.378	619.954	631.788	653.616	601.558	617.083	678.714	667.94	657.415	583.207	670.908	646.212	660.674	619.087	572.217	653.832	615.665	604.292	511.976
Q9D850	Tmem68	Transmembrane protein 68 OS=Mus musculus GN=Tmem68 PE=2 SV=1	NA	538.524	600.804	545.59	494.897	570.23	557.227	NA	NA	600.627	665.508	659.517	NA	NA	585.489	573.345	NA	844.031	767.207	600.032	632.127	821.534	NA	NA
A2ALS5-2	Rap1gap	Isoform 2 of Rap1 GTPase-activating protein 1 OS=Mus musculus GN=Rap1gap	636.707	648.113	591.832	637.471	630.366	633.494	679.508	655.734	668.476	636.996	659.949	599.076	620.222	648.996	615.381	628.858	606.982	654.834	659.542	631.75	633.396	639.426	658.791	622.008
Q9CQI7	Snrpb2	U2 small nuclear ribonucleoprotein B'' OS=Mus musculus GN=Snrpb2 PE=1 SV=1	655.963	601.251	670.678	646.934	703.268	641.981	591.681	623.434	494.364	618.598	621.233	594.763	449.656	507.564	578.193	597.485	547.549	514.343	514.052	646.281	581.221	560.251	559.349	602.213
P28334	Htr1b	5-hydroxytryptamine receptor 1B OS=Mus musculus GN=Htr1b PE=2 SV=1	NA	NA	NA	564.016	NA	NA	NA	NA	662.309	NA	706.946	NA	NA	638.481	NA	NA	NA	NA	NA	620.635	NA	NA	566.391	NA
Q6ZWV7	Rpl35	60S ribosomal protein L35 OS=Mus musculus GN=Rpl35 PE=1 SV=1	604.303	599.001	619.353	625.256	578.529	630.982	638.655	637.257	591.243	620.273	631.465	564.71	446.94	553.162	632.627	595.468	550.358	556.044	594.417	637.387	621.602	581.338	633.261	558.318
Q60864	Stip1	Stress-induced-phosphoprotein 1 OS=Mus musculus GN=Stip1 PE=1 SV=1	603.794	585.335	592.476	584.649	609.236	612.934	657.399	634.71	619.501	652.388	688.749	601.908	579.383	616.276	586.824	553.486	561.836	641.475	677.705	657.502	630.869	646.921	626.841	590.861
Q3TYH2	Rab15	Putative uncharacterized protein OS=Mus musculus GN=Rab15 PE=1 SV=1	614.937	645.905	632.355	676.542	613.285	608.12	560.99	631.064	579.475	563.634	596.074	602.431	610.425	605.983	598.091	554.607	604.359	534.99	614.882	603.617	591.443	545.128	607.348	600.694
E9PZF0	Gm20390	Nucleoside diphosphate kinase OS=Mus musculus GN=Gm20390 PE=3 SV=1	597.16	609.718	623.474	651.071	633.893	604.947	678.602	650.223	611.716	638.627	621.163	628.284	587.015	584.542	635.918	631.768	617.017	602.314	599.502	572.11	610.383	588.959	631.544	569.043
O55125	Nipsnap1	Protein NipSnap homolog 1 OS=Mus musculus GN=Nipsnap1 PE=1 SV=1	579.392	535.301	585.717	579.138	548.91	569.93	595.431	613.866	640.036	630.455	609.73	675.469	653.949	686.754	594.628	590.652	608.447	648.715	634.583	601.506	641.137	616.259	597.948	608.194
Q9Z307	Kcnj16	Inward rectifier potassium channel 16 OS=Mus musculus GN=Kcnj16 PE=1 SV=2	555.157	540.113	NA	494.343	NA	518.539	598.413	560.939	789.6	NA	698.241	719.335	755.195	727.516	745.934	NA	590.155	730.931	538.368	597.185	NA	761.793	577.659	420.925
Q5RJI5	Brsk1	Serine/threonine-protein kinase BRSK1 OS=Mus musculus GN=Brsk1 PE=1 SV=1	636.444	632.605	611.526	619.844	631.744	587.756	633.439	645.707	704.585	648.43	613.062	591.396	644.844	637.3	606.299	630.595	601.974	642.235	608.714	637.635	590.941	607.719	622.088	566.564
Q9QYY8	Spast	Spastin OS=Mus musculus GN=Spast PE=1 SV=3	557.879	597.448	596.859	642.675	552.26	611.365	647.324	627.179	546.886	621.459	677.462	634.695	699.051	633.78	666.026	602.657	650.809	641.575	683.965	630.793	606.545	644.256	575.711	584.498
G5E895	Akr1b10	Aldo-keto reductase family 1, member B10 (aldose reductase) OS=Mus musculus GN=Akr1b10 PE=1 SV=1	621.497	650.972	631.716	680.007	612.095	629.832	602.173	627.539	608.272	606.979	662	589.716	552.601	614.204	614.915	625.304	596.607	530.875	613.289	656.862	613.535	589.23	629.7	570.381
D3YXH0	Igsf5	Immunoglobulin superfamily member 5 OS=Mus musculus GN=Igsf5 PE=4 SV=1	648.151	566.932	599.903	611.194	642.313	648.553	613.796	585.61	663.061	627.747	715.864	589.998	504.928	569.263	613.122	600.555	526.45	648.579	594.287	662.871	594.58	653.735	612.814	609.93
Q8VD73	Kcnab3	Potassium voltage-gated channel, shaker-related subfamily, beta member 3 OS=Mus musculus GN=Kcnab3 PE=1 SV=1	613.429	595.424	609.78	488.03	578.094	494.744	607.689	613.066	629.983	583.172	673.029	686.772	608.058	617.802	596.633	674.455	608.784	537.024	630.566	583.799	636.657	640.831	604.729	488.727
E9Q035	Gm20425	Uncharacterized protein OS=Mus musculus GN=Gm20425 PE=4 SV=1	578.521	631.195	638.588	564.89	608.391	622.484	592.868	615.482	665.352	597.02	666.536	547.422	612.346	644.379	679.361	576.243	629.027	645.241	643.35	719.859	692.741	687.76	642.198	602.085
P62843	Rps15	40S ribosomal protein S15 OS=Mus musculus GN=Rps15 PE=1 SV=2	661.948	604.231	723.425	686.898	639.506	744.617	661.427	636.923	495.947	574.815	494.767	198.419	207.34	274.359	560.843	493.652	355.326	408.879	449.982	747.683	522.074	469.432	686.296	589.66
Q61937	Npm1	Nucleophosmin OS=Mus musculus GN=Npm1 PE=1 SV=1	673.6	667.555	695.885	617.735	684.999	707.177	588.701	585.696	536.755	602.46	593.376	525.15	549.004	517.131	543.808	570.51	551.066	537.172	566.815	641.336	592.706	561.401	579.253	628.201
P97376	Frg1	Protein FRG1 OS=Mus musculus GN=Frg1 PE=1 SV=2	NA	1686.9	NA	NA	NA	549.479	1223.99	NA	NA	NA	NA	586.757	NA	NA	510.07	NA	NA	1095.1	1637.94	NA	NA	1826.28	NA	NA
A2A690-2	Tanc2	Isoform 2 of Protein TANC2 OS=Mus musculus GN=Tanc2	604.611	625.151	638.425	619.147	651.01	645.611	632.713	590.338	603.863	635.813	568.753	562.087	572.274	577.951	629.016	629.655	553.803	608.784	614.488	603.259	625.226	600.563	603.384	571.581
Q8K330-2	Ssh3	Isoform 2 of Protein phosphatase Slingshot homolog 3 OS=Mus musculus GN=Ssh3	NA	NA	NA	655.494	NA	NA	NA	NA	541.921	NA	675.353	NA	NA	458.295	NA	NA	NA	NA	NA	721.093	NA	NA	669.802	NA
Q6P069	Sri	Sorcin OS=Mus musculus GN=Sri PE=1 SV=1	692.202	580.062	596.442	666.992	554.336	636.31	567.406	572.927	549.29	554.888	514.855	518.185	504.138	569.187	551.23	540.374	567.388	582.025	549.112	634.351	566.13	565.873	611.303	638.085
Q9JL61	Rfx5	DNA-binding protein Rfx5 OS=Mus musculus GN=Rfx5 PE=1 SV=2	NA	741.015	NA	600.973	NA	577.538	736.268	NA	NA	NA	815.953	781.097	NA	NA	821.741	NA	NA	815.959	633.584	588.345	NA	696.43	NA	NA
Q8BH59	Slc25a12	Calcium-binding mitochondrial carrier protein Aralar1 OS=Mus musculus GN=Slc25a12 PE=1 SV=1	613.292	619.726	607.122	609.528	597.11	594.173	598.68	631.079	591.424	596.067	591.599	577.611	579.733	573.1	605.7	594.165	592.167	570.706	608.553	624.311	615.355	583.579	597.979	622.917
Q99KR3	Lactb2	Endoribonuclease LACTB2 OS=Mus musculus GN=Lactb2 PE=1 SV=1	551.536	567.745	469.502	586.381	516.558	596.823	609.93	646.516	560.346	704.831	678.521	697.031	604.934	553.388	664.134	705.341	641.528	637.801	614.937	734.952	640.48	625.789	764.814	574.261
E9Q0N0	Itsn1	Intersectin-1 OS=Mus musculus GN=Itsn1 PE=1 SV=1	597.336	612.09	620.639	576.805	607.811	604.088	635.316	630.64	642.454	651.608	632.6	614.949	652.06	610.646	638.51	628.98	617.934	623.162	582.55	611.479	632.625	625.478	630.143	581.293
Q66JS6	Eif3j2	Eukaryotic translation initiation factor 3 subunit J-B OS=Mus musculus GN=Eif3j2 PE=1 SV=1	688.147	609.115	658.649	628.669	608.774	615.353	543.959	589.676	536.283	555.284	533.363	645.271	622.806	512.939	552.29	503.562	628.467	567.558	584.132	612.008	559.776	587.916	586.46	642.237
P16054	Prkce	Protein kinase C epsilon type OS=Mus musculus GN=Prkce PE=1 SV=1	647.237	634.757	632.177	676.209	637.364	621.225	615.829	611.838	563.111	612.734	572.262	582.289	576.223	545.784	595.693	596.889	603.314	571.929	635.213	600.045	620.752	586.998	621.202	663.888
P63216	Gng3	Guanine nucleotide-binding protein G(I)/G(S)/G(O) subunit gamma-3 OS=Mus musculus GN=Gng3 PE=1 SV=1	632.294	636.482	603.713	703.734	619.777	661.078	641.027	600.147	549.295	589.35	569.15	521.64	434.937	507.838	575.47	562.004	504.771	518.083	570.325	652.165	568.94	525.566	630.721	647.206
Q62167	Ddx3x	ATP-dependent RNA helicase DDX3X OS=Mus musculus GN=Ddx3x PE=1 SV=3	637.638	623.603	660.255	639.916	640.521	620.655	597.605	605.558	600.487	588.361	594.399	559.118	560.175	558.852	589.365	537.587	581.445	580.677	600.389	652.989	615.478	612.983	623.529	616.614
Q9Z1Q9	Vars	Valine--tRNA ligase OS=Mus musculus GN=Vars PE=1 SV=1	592.97	600.684	618.663	585.917	594.706	584.803	639.463	615.335	635.143	609.668	638.843	637.403	607.839	624.071	616.922	581.41	607.899	624.204	586.183	612.087	592.671	615.14	628.817	599.947
Q9D4C9	Clvs1	Clavesin-1 OS=Mus musculus GN=Clvs1 PE=1 SV=1	594.076	548.529	613.364	638.86	616.705	554.898	580.41	656.829	638.409	617.77	523.313	585.673	576.106	617.458	584.826	566.283	592.672	525.462	555.887	639.694	615.603	583.174	614.556	651.644
P53994	Rab2a	Ras-related protein Rab-2A OS=Mus musculus GN=Rab2a PE=1 SV=1	635.476	689.577	605.389	669.533	604.18	618.279	554.292	620.051	537.543	571.593	508.619	619.479	578.149	554.258	560.645	585.876	590.466	541.919	596.851	566.202	558.718	543.139	588.088	649.435
A0A0N4SUH8	Nfu1	NFU1 iron-sulfur cluster scaffold homolog, mitochondrial OS=Mus musculus GN=Nfu1 PE=1 SV=1	588.157	552.406	560.109	542.61	571.649	566.446	618.563	624.559	641.495	685.266	680.383	671.194	661.738	672.268	621.004	646.797	613.113	642.907	679.635	608.091	640.214	565.921	626.403	583.215
B9EKN8	Tnik	TRAF2 and NCK interacting kinase OS=Mus musculus GN=Tnik PE=1 SV=1	629.363	645.924	583.562	611.822	617.662	619.235	619.14	630.096	570.968	624.951	630.588	576.947	546.925	544.904	568.529	583.316	546.897	604.175	622.704	609.801	547.191	585.555	624.745	614.644
A0A0R4J1N7	Ank1	Ankyrin-1 OS=Mus musculus GN=Ank1 PE=1 SV=1	596.583	651.394	592.205	552.394	616.545	589.292	675.038	623.307	659.99	622.008	666.594	679.186	662.844	682.97	652.55	659.729	623.757	657.034	644.172	631.068	662.07	676.03	615.22	545.339
Q91WK1	Spryd4	SPRY domain-containing protein 4 OS=Mus musculus GN=Spryd4 PE=1 SV=1	NA	517.106	NA	656.013	NA	NA	626.004	NA	369.564	NA	643.493	NA	NA	353.697	NA	NA	NA	625.015	616.445	706.259	NA	654.088	558.488	NA
Q8C9B9	Dido1	Death-inducer obliterator 1 OS=Mus musculus GN=Dido1 PE=1 SV=4	NA	801.148	678.93	572.797	578.18	671.543	816.648	NA	754.106	459.448	659.812	472.905	NA	459.291	678.304	417.737	NA	397.583	440.038	748.573	496.254	457.446	683.239	NA
Q9WV18	Gabbr1	Gamma-aminobutyric acid type B receptor subunit 1 OS=Mus musculus GN=Gabbr1 PE=1 SV=1	634.812	680.383	646.15	652.25	622.522	669.193	606.829	621.865	563.601	611.977	573.444	564.806	610.548	591.439	664.704	634.235	638.24	557.114	623.934	601.682	596.627	535.415	563.666	596.224
Q9CX34	Sugt1	Protein SGT1 homolog OS=Mus musculus GN=Sugt1 PE=1 SV=3	632.782	599.24	619.095	615.335	636.065	646.342	591.13	624.769	612.722	632.735	591.672	615.856	604.172	625.247	588.801	620.771	602.434	578.199	628.614	630.776	621.095	597.39	622.743	600.873
Q60668	Hnrnpd	Heterogeneous nuclear ribonucleoprotein D0 OS=Mus musculus GN=Hnrnpd PE=1 SV=2	658.543	618.945	650.02	560.499	607.362	613.327	548.392	594.318	580.14	572.158	576.077	631.76	627.007	596.241	579.676	551.278	585.554	604.272	594.149	586.142	596.735	576.905	577.347	644.372
Q9JHS4	Clpx	ATP-dependent Clp protease ATP-binding subunit clpX-like, mitochondrial OS=Mus musculus GN=Clpx PE=1 SV=2	557.348	587.113	617.693	590.927	629.256	558.619	648.043	624.132	664.624	673.233	661.775	608.87	658.499	661.956	608.644	673.385	630.902	640.984	615.459	629.104	662.141	660.558	652.196	551.021
Q8CG76	Akr7a2	Aflatoxin B1 aldehyde reductase member 2 OS=Mus musculus GN=Akr7a2 PE=1 SV=3	663.626	633.85	673.979	664.462	696.838	687.067	603.571	603.862	557.344	579.368	599.116	518.435	540.297	492.82	578.669	586.859	564.799	560.78	626.098	665.106	631.502	587.906	681.525	617.248
O35474	Edil3	EGF-like repeat and discoidin I-like domain-containing protein 3 OS=Mus musculus GN=Edil3 PE=1 SV=2	583.041	657.922	581.663	677.691	607.816	634.195	670.764	597.673	658.627	634.775	647.736	620.952	597.846	638.485	590.518	711.174	603.561	695.208	663.621	684.339	626.936	731.439	676.612	543.476
O09114	Ptgds	Prostaglandin-H2 D-isomerase OS=Mus musculus GN=Ptgds PE=1 SV=1	655.004	713.353	650.412	577.461	653.735	615.611	602.24	545.314	618.296	540.444	481.594	545.841	608.19	638.228	596.6	554.74	614.469	619.237	549.199	598.671	592.18	609.086	626.577	753.137
Q9DC63	Fbxo3	F-box only protein 3 OS=Mus musculus GN=Fbxo3 PE=1 SV=1	534.733	493.012	524.42	558.894	519.431	632.898	526.755	600.979	621.568	560.212	572.011	560.936	641.78	643.203	611.347	674.205	598.195	584.527	527.909	569.312	570.035	571.971	562.81	521.595
Q62159	Rhoc	Rho-related GTP-binding protein RhoC OS=Mus musculus GN=Rhoc PE=1 SV=2	607.997	578.576	565.491	644.132	552.236	585.97	499.754	578.574	565.058	586.157	592.809	605.624	598.869	650.095	573.55	589.686	606.977	558.115	560.044	578.621	572.663	525.383	575.223	580.682
P22599	Serpina1b	Alpha-1-antitrypsin 1-2 OS=Mus musculus GN=Serpina1b PE=1 SV=2	603.164	666.963	588.669	592.753	661.583	579.671	792.569	709.683	846.712	652.728	653.505	477.851	528.372	715.638	705.836	541.256	647.902	668.456	631.012	762.926	738.682	722.477	601.478	651.411
P16460	Ass1	Argininosuccinate synthase OS=Mus musculus GN=Ass1 PE=1 SV=1	602.536	568.498	604.964	615.732	572.543	583.135	553.113	592.713	605.244	577.043	606.58	514.231	574.956	599.656	581.934	611.146	597.209	552.504	549.801	635.416	602.975	569.501	638.152	613.779
P10107	Anxa1	Annexin A1 OS=Mus musculus GN=Anxa1 PE=1 SV=2	675.46	NA	769.196	651.556	746.732	NA	NA	614.81	476.195	542.582	578.169	NA	518.749	677.807	NA	520.83	644.305	NA	NA	580.076	677.675	NA	645.913	631.653
B1AUH5	Cask	Peripheral plasma membrane protein CASK (Fragment) OS=Mus musculus GN=Cask PE=1 SV=1	735.828	680.226	720.121	758.083	716.224	852.809	638.577	499.559	506.781	550.971	413.669	471.099	279.649	455.81	670.673	620.591	375.63	483.827	576.957	600.034	594.525	533.62	664.062	678.052
Q8BHZ0	Fam49a	Protein FAM49A OS=Mus musculus GN=Fam49a PE=1 SV=1	652.602	611.937	662.375	612.822	657.675	638.076	544.272	616.505	615.744	617.725	603.573	695.337	677.21	663.988	626.35	594.913	642.299	627.127	643.526	570.974	611.267	560.257	609.307	633.098
Q91X52	Dcxr	L-xylulose reductase OS=Mus musculus GN=Dcxr PE=1 SV=2	783.671	1200.13	796.038	500.564	567.361	569.16	577.21	529.261	678.995	540.164	634.434	549.787	877.344	648.249	591.744	514.407	611.048	682.005	914.517	586.279	527.777	615.479	607.715	565.294
P12658	Calb1	Calbindin OS=Mus musculus GN=Calb1 PE=1 SV=2	652.592	622.61	563.581	702.243	620.147	618.813	559.628	608.15	525.479	595.075	567.837	605.457	513.996	513.428	535.789	500.482	606.611	518.704	571.724	557.789	491.455	533.398	558.447	672.727
P01901	H2-K1	H-2 class I histocompatibility antigen, K-B alpha chain OS=Mus musculus GN=H2-K1 PE=1 SV=1	604.417	486.162	788.976	509.084	485.788	579.771	662.652	724.64	647.337	507.978	607.995	413.825	619.833	651.992	733.745	600.397	617.412	655.485	540.433	699.685	683.771	674.878	634.059	612.999
E9Q540	Hrh3	Histamine H3 receptor OS=Mus musculus GN=Hrh3 PE=3 SV=1	NA	NA	NA	743.663	NA	759.939	NA	NA	NA	NA	385.849	283.087	NA	NA	407.233	NA	NA	NA	NA	505.409	NA	NA	NA	NA
P22682	Cbl	E3 ubiquitin-protein ligase CBL OS=Mus musculus GN=Cbl PE=1 SV=3	593.489	579.707	589.08	624.804	581.942	589.708	592.665	629.504	610.1	657.113	720.022	697.837	571.89	577.973	634.607	611.96	569.631	615.961	572.961	654.677	617.918	615.176	630.225	564.688
Q9JJA9	Grasp	General receptor for phosphoinositides 1-associated scaffold protein OS=Mus musculus GN=Grasp PE=1 SV=2	650.422	629.034	545.064	729.79	613.263	704.211	714.918	697.327	630.024	717.645	669.896	623.198	553.37	548.761	521.812	651.711	673.8	749.491	661.998	621.002	607.139	713.621	591.434	546.423
Q80TA9	Epg5	Ectopic P granules protein 5 homolog OS=Mus musculus GN=Epg5 PE=1 SV=2	565.748	535.177	662.117	570.089	580.298	607.189	606.007	604.029	711.784	618.018	557.311	587.707	701.039	721.554	693.91	658.438	679.263	669.943	615.455	653.626	699.727	630.382	652.077	561.65
Q8BGZ1	Hpcal4	Hippocalcin-like protein 4 OS=Mus musculus GN=Hpcal4 PE=1 SV=3	637.713	620.602	556.861	668.971	575.151	609.037	581.36	628.234	515.591	558.858	551.36	683.735	520.816	529.71	541.68	550.625	561.486	510.542	582.514	578.64	503.066	517.67	561.776	624.643
B5B2N2	Nfatc1	Nuclear factor of activated T-cells c1 isoform IA-IXL OS=Mus musculus GN=Nfatc1 PE=1 SV=1	NA	673.781	NA	566.259	NA	519.868	671.529	NA	NA	NA	590.128	538.662	NA	NA	549.365	NA	NA	679.562	664.298	598.125	NA	716.681	NA	NA
Q8CDM8	Fam160b1	Protein FAM160B1 OS=Mus musculus GN=Fam160b1 PE=1 SV=2	706.271	632.526	642.835	593.247	597.566	575.301	526.829	594.561	581.865	554.61	512.362	605.767	663.364	648.161	556.299	568.589	721.135	611.244	654.967	556.45	604.305	590.804	577.912	756.497
Q99N93	Mrpl16	39S ribosomal protein L16, mitochondrial OS=Mus musculus GN=Mrpl16 PE=1 SV=1	566.354	591.411	594.007	528.469	553.373	561.915	615.885	554.923	607.412	592.571	623.789	668.666	781.65	587.291	640.272	643.571	678.32	662.446	625.55	574.675	591.002	639.324	548.659	605.106
Q8K3B1	Fbxo45	F-box/SPRY domain-containing protein 1 OS=Mus musculus GN=Fbxo45 PE=1 SV=2	688.904	721.305	667.171	848.682	604.01	870.335	715.299	622.211	510.89	479.637	435.36	294.443	297.759	357.965	553.512	666.578	404.106	815.941	776.604	763.812	565.313	725.183	513.2	547.009
Q8BUY8	Gprasp2	G-protein coupled receptor-associated sorting protein 2 OS=Mus musculus GN=Gprasp2 PE=1 SV=2	640.427	611.481	599.001	652.669	630.771	645.01	567.333	684.636	536.937	608.252	709.139	482.74	462.544	415.709	574.553	589.248	571.064	525.209	585.513	724.092	590.383	603.59	648.837	636.641
P01899	H2-D1	H-2 class I histocompatibility antigen, D-B alpha chain OS=Mus musculus GN=H2-D1 PE=1 SV=2	604.417	486.162	788.976	509.084	485.788	579.246	662.652	724.64	647.337	507.978	607.995	432.132	619.833	651.992	785.964	600.397	617.412	655.485	540.433	699.685	683.771	674.878	634.059	612.999
Q8BUV3	Gphn	Gephyrin OS=Mus musculus GN=Gphn PE=1 SV=2	585.755	561.958	608.615	561.216	591.298	586.16	601.755	615.561	642.696	628.122	614.245	613.479	636.07	646.522	610.149	617.528	635.447	609.246	613.958	606.813	646.864	619.914	603.313	589.208
A0A0N4SW28	Gng12	Guanine nucleotide-binding protein subunit gamma OS=Mus musculus GN=Gng12 PE=1 SV=1	642.569	631.332	639.726	618.845	623.138	585.613	593.771	565.494	571.263	539.646	576.584	658.832	724.335	621.302	597.495	590.566	666.749	540.789	634.663	596.064	614.269	633.66	635.373	613.185
Q80U63	Mfn2	Mitofusin-2 OS=Mus musculus GN=Mfn2 PE=1 SV=3	577.773	587.307	617.967	633.344	590.209	630.966	608.552	598.872	602.854	665.388	663.281	628.991	522.863	591.595	616.15	647.605	569.339	602.943	636.181	636.916	638.238	610.521	582.265	635.213
Q8BPN8	Dmxl2	DmX-like protein 2 OS=Mus musculus GN=Dmxl2 PE=1 SV=3	623.793	622.262	614.774	643.285	613.623	620.079	604.49	627.217	588.823	588.256	575.345	623.621	610.034	606.893	597.231	615.142	610.203	601.209	617.172	598.794	602.036	571.961	606.989	629.433
Q8BGW1	Fto	Alpha-ketoglutarate-dependent dioxygenase FTO OS=Mus musculus GN=Fto PE=1 SV=1	626.61	594.072	617.225	576.715	607.146	622.101	600.024	590.325	588.572	656.521	619.923	613.709	642.602	659.67	634.048	669.376	679.478	619.714	598.659	579.651	620.85	602.743	555.147	572.648
E9QK48	Eml2	Echinoderm microtubule-associated protein-like 2 OS=Mus musculus GN=Eml2 PE=1 SV=1	603.267	612.942	662.474	606.176	632.524	606.363	605.582	586.158	663.402	592.57	586.626	603.192	600.782	638.805	519.977	637.173	607.1	636.319	547.968	612.692	696.975	611.941	644.01	602.238
O08989	Mras	Ras-related protein M-Ras OS=Mus musculus GN=Mras PE=1 SV=1	621.577	621.524	620.125	602.911	621.487	600.658	568.161	578.196	573.713	568.296	568.365	618.286	685.488	609.018	586.655	535.385	623.467	628.683	611.968	592.901	565.957	611.992	584.149	664.847
E9Q1G8	2019-09-07	Septin-7 OS=Mus musculus GN=Sept7 PE=1 SV=2	616.217	588.231	615.388	606.933	622.216	669.153	581.186	600.426	546.482	596.734	588.013	545.495	551.763	539.984	554.914	566.7	531.194	572.477	628.091	656.948	586.332	568.111	617.925	617.173
A0A0R4J2B2	Kctd12	BTB/POZ domain-containing protein KCTD12 OS=Mus musculus GN=Kctd12 PE=1 SV=1	647.58	679.802	646.792	681.775	695.275	643.262	615.714	614.46	570.798	643.008	583.019	614.387	622.97	589.124	599.976	604.27	611.017	569.554	616.301	564.187	575.002	584.036	586.92	724.075
Q60766	Irgm1	Immunity-related GTPase family M protein 1 OS=Mus musculus GN=Irgm1 PE=1 SV=1	634.091	685.225	687.988	696.664	651.117	681.838	603.029	409.792	NA	503.728	624.511	456.736	154.071	NA	618.281	544.211	330.004	350.389	522.689	615.913	507.089	563.428	NA	553.071
Q7TMK9-2	Syncrip	Isoform 2 of Heterogeneous nuclear ribonucleoprotein Q OS=Mus musculus GN=Syncrip	646.084	618.91	639.38	639.04	600.895	596.674	563.578	611.752	604.491	600.358	616.169	617.581	618.224	581.114	576.943	579.639	615.045	565.174	606.259	587.483	587.183	572.621	597.846	663.269
Q61941	Nnt	NAD(P) transhydrogenase, mitochondrial OS=Mus musculus GN=Nnt PE=1 SV=2	602.722	588.078	618.322	592.645	615.786	598.63	648.54	646.313	615.698	625.52	647.923	578.764	573.683	638.262	616.037	614.303	593.322	617.685	631.043	601.214	647.075	535.64	653.36	617.094
Q99KW9	Itfg1	T-cell immunomodulatory protein OS=Mus musculus GN=Itfg1 PE=1 SV=2	728.062	676.04	693.108	694.997	698.438	656.114	681.893	672.844	685.679	637.482	674.471	764.292	807.478	753.987	681.009	670.424	761.19	717.488	633.725	668.174	650.88	686.961	623.755	676.607
Q8C7H1	Mmaa	Methylmalonic aciduria type A homolog, mitochondrial OS=Mus musculus GN=Mmaa PE=1 SV=1	495.45	569.117	628.704	599.623	656.493	558.968	600.952	579.157	600.617	653.032	709.949	629.88	599.722	605.993	695.315	782.906	634.701	690.177	585.899	646.316	639.704	603.455	634.449	526.041
Q99JR5	Tinagl1	Tubulointerstitial nephritis antigen-like OS=Mus musculus GN=Tinagl1 PE=1 SV=1	548.344	NA	570.279	663.71	618.637	699.534	NA	534.911	638.203	727.023	588.015	525.232	605.917	858.483	812.03	821.907	605.045	NA	NA	655.082	782.882	NA	511.479	604.473
F6ZSG0	Mtdh	Protein LYRIC (Fragment) OS=Mus musculus GN=Mtdh PE=1 SV=1	566.011	600.764	562.97	603.592	562.755	624.414	647.753	593.364	655.197	594.839	558.505	584.444	525.209	657.88	614.34	617.61	506.538	647.904	600.769	681.275	645.018	659.9	584.922	650.947
Q8BWF0	Aldh5a1	Succinate-semialdehyde dehydrogenase, mitochondrial OS=Mus musculus GN=Aldh5a1 PE=1 SV=1	590.055	607.249	602.864	626.582	584.208	598.806	622.497	621.997	624.013	605.282	617.033	554.689	623.179	638.958	621.328	594.257	606.144	650.288	618.404	624.61	643.737	635.821	629.377	615.671
P10922	H1f0	Histone H1.0 OS=Mus musculus GN=H1f0 PE=2 SV=4	631.721	539.268	701.766	532.095	633.18	647.266	558.272	557.027	584.19	491.33	540.963	473.548	654.335	671.219	534.741	475.92	604.27	710.597	671.999	619.663	608.711	670.902	606.189	553.857
Q8CGF6	Wdr47	WD repeat-containing protein 47 OS=Mus musculus GN=Wdr47 PE=1 SV=2	629.497	633.871	601.914	670.224	630.049	663.315	602.122	612.059	557.198	594.631	583.116	610.214	629.383	514.788	582.914	593.554	584.848	593.18	614.54	618.745	586.687	620.866	622.404	630.6
Q3ULJ0	Gpd1l	Glycerol-3-phosphate dehydrogenase 1-like protein OS=Mus musculus GN=Gpd1l PE=1 SV=2	590.674	560.964	604.11	614.735	634.752	610.434	590.887	592.182	574.963	611.055	579.769	643.482	696.465	709.664	636.552	572.443	637.672	657.074	653.038	588.381	573.752	615.297	589.562	618.241
Q80X85	Mrps7	28S ribosomal protein S7, mitochondrial OS=Mus musculus GN=Mrps7 PE=1 SV=1	626.862	575.334	576.367	566.875	507.089	555.177	625.304	627.18	777.42	557.217	588.291	671.712	797.092	866.882	556.943	621.619	640.018	654.007	637.703	558.423	582.968	674.233	739.569	657.691
Q9CZP5	Bcs1l	Mitochondrial chaperone BCS1 OS=Mus musculus GN=Bcs1l PE=1 SV=1	623.184	626.513	671.873	633.166	621.344	623.536	591.325	638.256	658.967	663.706	666.355	623.751	645.681	639.734	577.501	653.524	651.942	598.127	646.316	664.377	650.346	616.977	627.129	635.218
Q9DC33-2	Hmg20a	Isoform 2 of High mobility group protein 20A OS=Mus musculus GN=Hmg20a	NA	687.324	NA	673.208	NA	675.396	736.616	NA	728.631	NA	802.342	836.656	NA	714.974	732.058	NA	NA	789.769	763.854	633.77	NA	743.038	681.379	NA
A0A0R4IZZ1	Aplp1	Amyloid beta (A4)-like protein 1 OS=Mus musculus GN=Aplp1 PE=1 SV=1	735.44	660.935	629.496	651.834	580.764	736.614	654.053	640.891	570.186	571.386	611.668	475.283	310.498	434.62	614.875	592.936	461.911	528.005	559.987	672.04	550.11	561.822	684.804	591.03
P28740-2	Kif2a	Isoform 2 of Kinesin-like protein KIF2A OS=Mus musculus GN=Kif2a	638.949	612.863	617.915	629.067	597.254	636.703	588.753	615.401	604.178	594.321	561.034	610.632	561.683	561.369	569.557	564.847	571.596	547.387	604.452	623.321	616.703	579.449	621.6	629.246
Q8VHM5	Hnrnpr	Heterogeneous nuclear ribonucleoprotein R OS=Mus musculus GN=Hnrnpr PE=1 SV=1	630.7	657.982	645.784	590.405	593.369	622.139	548.548	613.152	616.568	580.387	628.036	606.559	642.387	627.824	623.605	599.52	621.223	572.268	600.825	616.589	583.543	572.326	605.503	635.956
Q64471	Gstt1	Glutathione S-transferase theta-1 OS=Mus musculus GN=Gstt1 PE=1 SV=4	654.884	546.137	558.271	615.863	598.696	651.457	607.267	609.929	764.791	561.846	702.964	664.124	683.096	832.27	711.02	650.573	695.307	777.051	597.35	651.176	594.754	673.645	651.59	563.572
Q69ZS7	Hbs1l	HBS1-like protein OS=Mus musculus GN=Hbs1l PE=1 SV=2	654.455	589.508	575.67	571.633	561.704	595.481	743.616	595.002	624.19	616.628	692.186	674.692	607.589	602.359	610.786	598.764	601.042	703.716	591.026	698.545	580.673	668.024	640.381	598.032
Q8BVN4	Mterf4	Transcription termination factor 4, mitochondrial OS=Mus musculus GN=Mterf4 PE=2 SV=1	NA	528.775	NA	NA	NA	586.36	668.855	NA	685.833	NA	NA	316.217	NA	724.739	734.393	NA	NA	649.902	570.447	NA	NA	660.011	673.09	NA
Q8BK03	Miga2	Mitoguardin 2 OS=Mus musculus GN=Miga2 PE=1 SV=1	664.503	579.217	603.271	531.598	526.58	576.344	594.173	639.225	677.6	595.13	671.911	653.368	655.832	695.421	608.619	566.984	600.684	581.133	615.454	660.818	606.052	622.175	584.647	623.036
P55088-3	Aqp4	Isoform 3 of Aquaporin-4 OS=Mus musculus GN=Aqp4	458.306	366.868	585.651	509.547	787.792	597.11	459.947	447.592	336.701	359.143	369.031	237.975	190.676	300.048	273.574	293.148	235.239	221.493	340.937	680.418	398.89	358.29	529.119	391.861
Q9R112	Sqrdl	Sulfide:quinone oxidoreductase, mitochondrial OS=Mus musculus GN=Sqrdl PE=1 SV=3	634.107	529.928	602.438	658.354	598.865	566.327	584.916	529.266	619.527	591.31	649.489	560.054	617.094	696.124	614.137	652.199	665.415	763.117	529.468	631.136	676.644	729.391	616.88	594.509
F7B0R9	2010300C02Rik	RIKEN cDNA 2010300C02 gene (Fragment) OS=Mus musculus GN=2010300C02Rik PE=1 SV=1	530.035	621.718	623.64	632.872	632.206	606.624	662.797	657.201	609.006	699.31	711.836	702.549	685.788	620.741	661.998	651.788	661.968	730.057	580.518	564.189	596.687	629.521	618.409	577.149
P62996	Tra2b	Transformer-2 protein homolog beta OS=Mus musculus GN=Tra2b PE=1 SV=1	704.032	770.075	730.857	651.181	653.973	629.344	606.505	670.381	538.073	499.794	524.709	660.617	623.779	568.843	563.088	502.94	612.427	503.874	640.998	637.451	490.933	589.068	595.588	759.031
O89020-3	Afm	Isoform 3 of Afamin OS=Mus musculus GN=Afm	632.653	668.914	NA	885.215	NA	738.025	755.283	745.107	NA	NA	399.498	417.005	834.833	NA	672.23	NA	796.639	886.882	736.75	841.317	NA	683.333	NA	736.365
Q9EPU4	Cpsf1	Cleavage and polyadenylation specificity factor subunit 1 OS=Mus musculus GN=Cpsf1 PE=1 SV=1	588.859	600.917	647.136	581.386	543.031	669.026	591.97	583.411	704.389	642.757	577.958	724.975	846.881	637.007	674.427	557.788	662.86	567.092	432.278	590.243	664.997	449.253	537.881	548.171
Q07113	Igf2r	Cation-independent mannose-6-phosphate receptor OS=Mus musculus GN=Igf2r PE=1 SV=1	558.432	NA	815.28	651.551	759.388	804.054	NA	634.937	437.07	727.096	609.407	688.984	611.95	334.188	611.829	625.487	609.456	NA	NA	634.593	623.704	NA	718.128	588.823
E9QB02	Mars	Methionine--tRNA ligase, cytoplasmic OS=Mus musculus GN=Mars PE=1 SV=1	582.229	573.399	592.407	620.641	591.657	602.089	652.329	622.371	643.395	640.885	697.786	665.388	628.834	614.707	663.849	629.391	599.534	653.064	632.547	641.27	640.761	637.666	619.91	554.267
Q8BN59	Larp6	La-related protein 6 OS=Mus musculus GN=Larp6 PE=1 SV=1	596.96	583.594	599.066	581.862	702.282	551.294	672.933	640.57	662.264	582.416	616.695	710.645	671.528	647.778	592.235	691.503	652.474	714.539	602.323	602.892	609.74	543.894	587.458	549.803
Q9EPL9	Acox3	Peroxisomal acyl-coenzyme A oxidase 3 OS=Mus musculus GN=Acox3 PE=1 SV=2	617.006	613.614	714.726	542.947	671.234	524.842	571.461	592.466	747.703	544.494	540.961	620.002	746.626	764.781	620.928	651.632	694.759	634.122	601.955	598.49	648.188	671.916	721.405	660.111
Q9QXK3	Copg2	Coatomer subunit gamma-2 OS=Mus musculus GN=Copg2 PE=1 SV=1	589.985	606.489	602.9	594.108	598.632	592.631	638.274	630.336	640.937	664.279	656.199	671.878	641.589	615.22	652.955	647.414	636.607	655.26	647.6	631.138	679.371	652.548	590.774	582.372
Q80U19	Daam2	Disheveled-associated activator of morphogenesis 2 OS=Mus musculus GN=Daam2 PE=1 SV=4	668.032	647.921	674.158	577.448	663.066	614.85	581.188	570.468	554.587	625.125	608.571	619.759	610.228	652.046	569.443	615.173	660.621	642.994	687.079	580.13	643.24	681.289	596.397	605.15
Q8R3P0	Aspa	Aspartoacylase OS=Mus musculus GN=Aspa PE=1 SV=2	676.995	621.358	617.146	586.218	572.115	588.947	614.905	521.089	669.468	538.082	579.548	632.774	694.503	724.818	660.337	684.21	692.9	706.681	614.605	671.102	659.062	784.829	591.007	587.25
Q9Z1S3	Rasgrp1	RAS guanyl-releasing protein 1 OS=Mus musculus GN=Rasgrp1 PE=1 SV=1	629.091	607.789	624.444	684.304	619.686	714.128	522.886	583.555	576.342	583.176	586.705	673.893	615.896	608.115	644.559	627.293	727.883	629.719	671.574	583.241	588.027	611.761	628.649	715.217
Q8BWS5	Gprin3	G protein-regulated inducer of neurite outgrowth 3 OS=Mus musculus GN=Gprin3 PE=1 SV=1	599.283	578.331	567.274	629.731	637.667	621.872	637.491	623.175	670.154	659.352	675.768	582.023	564.355	692.794	555.527	590.976	586.409	601.18	577.356	621.982	600.316	605.062	635.818	595.995
Q7TNC4	Luc7l2	Putative RNA-binding protein Luc7-like 2 OS=Mus musculus GN=Luc7l2 PE=1 SV=1	611.854	628.335	585.284	647.071	595.777	739.237	622.161	515.994	547.044	613.845	506.573	332.508	440.06	464.636	501.611	648.137	493.973	574.128	507.821	594.019	575.479	553.349	597.898	518.173
Q60967	Papss1	Bifunctional 3'-phosphoadenosine 5'-phosphosulfate synthase 1 OS=Mus musculus GN=Papss1 PE=1 SV=1	613.86	616.442	589.957	572.404	580.14	609.632	647.834	609.651	677.962	609.578	556.275	644.521	595.48	589.31	656.662	602.249	623.776	589.812	580.862	615.452	551.028	660.715	654.045	655.29
Q3TIU4	Pde12	2',5'-phosphodiesterase 12 OS=Mus musculus GN=Pde12 PE=1 SV=2	576.201	557.474	638.892	553.945	600.211	597.029	624.215	592.53	633.408	627.87	626.911	647.803	649.282	592.828	680.03	618.649	610.615	671.19	609.17	630.747	652.085	684.87	607.009	613.023
Q9EST3	Eif4enif1	Eukaryotic translation initiation factor 4E transporter OS=Mus musculus GN=Eif4enif1 PE=1 SV=2	673.959	653.427	608.027	550.774	574.403	634.732	604.317	602.847	634.392	623.32	646.875	591.923	748.865	680.172	695.842	548.612	637.627	658.91	671.526	616.259	638.755	657.23	564.143	683.701
Q64314	Cd34	Hematopoietic progenitor cell antigen CD34 OS=Mus musculus GN=Cd34 PE=1 SV=1	640.678	561.575	622.579	597.563	645.48	689.307	607.481	641.772	611.144	614.935	590.182	520.137	380.334	550.133	657.635	611.435	541.31	570.172	529.031	619.842	574.91	540.544	652.046	538.981
E9PXF0	Pcdh17	Protocadherin 17 OS=Mus musculus GN=Pcdh17 PE=1 SV=1	660.094	575.578	549.281	619.193	511.443	627.746	631.964	657.932	760.343	714.299	609.224	581.029	521.657	513.075	612.242	614.604	619.402	650.221	521.867	670.268	591.83	641.333	603.915	586.309
B1AR17	Chd3	Chromodomain helicase DNA-binding protein 3 OS=Mus musculus GN=Chd3 PE=1 SV=1	567.724	698.658	609.698	662.209	595.137	638.701	598.116	626.785	675.886	607.344	575.097	521.432	475.522	587.779	590.518	646.196	638.498	587.102	641.042	626.123	606.047	605.59	574.877	587.317
Q6PDS3-3	Sarm1	Isoform 3 of Sterile alpha and TIR motif-containing protein 1 OS=Mus musculus GN=Sarm1	684.81	649.176	694.194	623.544	651.634	654.076	571.464	642.377	620.955	625.795	581.427	587.735	610.521	633.744	623.111	613.59	638.761	575.606	628.309	625.288	660.484	607.728	645.928	675.053
Q9Z188-3	Dyrk1b	Isoform 3 of Dual specificity tyrosine-phosphorylation-regulated kinase 1B OS=Mus musculus GN=Dyrk1b	641.365	756.415	622.4	644.618	631.982	664.518	564.713	592.237	388.792	570.267	527.515	755.85	479.945	255.679	628.525	630.729	543.453	654.147	635.607	677.878	578.609	647.038	608.469	564.728
F7BLT7	Gnao1	Guanine nucleotide-binding protein G(o) subunit alpha (Fragment) OS=Mus musculus GN=Gnao1 PE=1 SV=1	669.204	654.458	707.179	663.97	663.573	644.072	587.694	571.148	529.554	527.824	584.629	564.471	579.959	564.416	571.884	542.835	579.964	610.837	606.785	590.262	549.979	572.795	618.521	668.332
Q5SUS9	Ewsr1	RNA-binding protein EWS OS=Mus musculus GN=Ewsr1 PE=1 SV=1	565.093	574.757	626.921	570.953	599.044	624.035	596.816	608.311	646.067	625.573	708.443	787.924	713.867	800.854	609.867	582.456	630.728	685.989	564.393	599.803	627.203	632.742	549.283	601.088
Q61553	Fscn1	Fascin OS=Mus musculus GN=Fscn1 PE=1 SV=4	653.318	707.225	595.942	706.251	607.421	649.369	575.662	605.602	483.455	525.172	565.072	454.366	467.917	435.809	581.112	540.987	536.3	460.478	583.974	619.042	547.694	477.633	617.652	663.239
Q8K3H0	Appl1	DCC-interacting protein 13-alpha OS=Mus musculus GN=Appl1 PE=1 SV=1	645.001	623.044	629.886	595.965	632.81	668.163	589.336	618.587	573.452	608.156	627.9	663.16	566.208	599.905	611.553	598.297	584.956	597.359	631.575	624.22	576.202	576.793	618.981	597.506
Q6P5U7	Nwd2	NACHT and WD repeat domain-containing protein 2 OS=Mus musculus GN=Nwd2 PE=1 SV=2	611.688	578.934	601.344	602.513	594.183	650.224	582.326	619.561	631.16	638.005	585.169	618.13	620.233	611.973	580.517	591.569	606.692	582.729	613.53	572.202	592.981	599.257	602.245	592.505
P26369	U2af2	Splicing factor U2AF 65 kDa subunit OS=Mus musculus GN=U2af2 PE=1 SV=3	695.025	663.45	635.863	604.398	639.681	608.522	593.68	623.127	591.106	577.664	531.994	604.42	644.671	613.798	620.591	561.823	675.612	584.104	607.31	551.287	606.664	581.011	580.353	685.493
Q9JII6	Akr1a1	Alcohol dehydrogenase [NADP(+)] OS=Mus musculus GN=Akr1a1 PE=1 SV=3	616.298	655.594	677.362	589.382	692.652	653.971	645.793	587.046	602.338	610.864	550.837	590.909	672.421	633.747	626.367	629.279	659.856	648.687	623.14	594.875	636.503	632.928	655.834	631.761
Q921F2	Tardbp	TAR DNA-binding protein 43 OS=Mus musculus GN=Tardbp PE=1 SV=1	695.118	760.191	674.218	640.041	603.931	636.406	551.347	568.458	477.912	523.655	547.426	476.901	443.171	384.525	582.155	516.142	529.242	427.768	560.066	580.572	524.491	528.971	645.836	700.658
P23818	Gria1	Glutamate receptor 1 OS=Mus musculus GN=Gria1 PE=1 SV=1	634.548	616.537	629.029	640.66	649.03	666.469	593.62	627.556	543.671	587.199	576.624	604.954	566.567	527.341	590.905	586.489	592.958	557.811	609.075	590.145	582.61	548.242	600.83	655.439
O54879	Hmgb3	High mobility group protein B3 OS=Mus musculus GN=Hmgb3 PE=1 SV=3	585.786	704.66	622.207	562.426	547.897	582.333	729.344	646.02	705.035	636.764	717.567	624.842	621.36	653.16	641.606	606.03	560.371	782.942	691.391	565.704	589.479	657.935	699.669	607.575
Q8BWJ3	Phka2	Phosphorylase b kinase regulatory subunit alpha, liver isoform OS=Mus musculus GN=Phka2 PE=1 SV=1	NA	696.611	NA	568.146	NA	574.848	590.71	NA	567.796	NA	617.399	650.323	NA	713.196	682.857	NA	NA	723.055	696.208	576.79	NA	699.428	611.576	NA
Q9JJU8	Sh3bgrl	SH3 domain-binding glutamic acid-rich-like protein OS=Mus musculus GN=Sh3bgrl PE=1 SV=1	676.576	687.91	659.291	625.391	635.759	619.386	564.696	629.373	620.58	539.494	540.317	551.161	650.432	664.087	597.052	584.829	682.577	599.371	580.028	586.201	600.358	555.426	677.304	777.636
P50544	Acadvl	Very long-chain specific acyl-CoA dehydrogenase, mitochondrial OS=Mus musculus GN=Acadvl PE=1 SV=3	655.302	633.338	618.605	612.677	601.648	608.719	585.142	592.048	583.897	555.129	530.798	612.522	624.512	629.293	557.477	596.8	637.313	625.225	575.511	565.951	611.412	593.006	601.042	669.029
Q8VCR3	Tmem242	Transmembrane protein 242 OS=Mus musculus GN=Tmem242 PE=2 SV=1	643.888	634.525	650.597	NA	656.217	NA	675.875	665.559	NA	744.396	NA	NA	694.273	NA	NA	560.505	666.685	565.657	632.666	NA	709.395	643.594	NA	637.494
Q61024	Asns	Asparagine synthetase [glutamine-hydrolyzing] OS=Mus musculus GN=Asns PE=1 SV=3	585.254	593.619	602.663	626.243	602.231	605.053	624.269	595.7	655.362	635.54	648.955	657.005	706.335	692.184	607.811	555.466	634.841	628.345	640.906	639.256	607.267	665.682	634.343	655.271
P15209	Ntrk2	BDNF/NT-3 growth factors receptor OS=Mus musculus GN=Ntrk2 PE=1 SV=1	605.542	606.876	579.469	600.503	597.524	604.812	661.201	595.056	607.021	626.1	635.946	663.177	626.505	587.392	609.153	608.427	627.923	653.235	664.132	642.7	629.399	647.193	617.798	632.72
Q9JL56	Gde1	Glycerophosphodiester phosphodiesterase 1 OS=Mus musculus GN=Gde1 PE=1 SV=1	583.15	576.088	590.577	702.366	610.65	690.571	631.429	637.998	698.602	590.43	619.157	563.163	665.383	671.703	667.827	761.949	633.454	598.427	585.139	637.952	632.816	592.932	638.206	559.365
Q99MR0	Actl6b	Actin-like protein 6B OS=Mus musculus GN=Actl6b PE=1 SV=1	635.943	691.469	658.362	626.243	677.744	728.319	629.542	626.149	628.429	615.201	550.296	455.938	602.323	651.47	665.295	634.369	610.439	588.554	604.186	621.618	637.53	663.215	625.406	611.646
Q6PER3	Mapre3	Microtubule-associated protein RP/EB family member 3 OS=Mus musculus GN=Mapre3 PE=1 SV=1	586.964	571.895	597.361	569.922	641.168	594.436	617.479	628.776	631.681	618.093	592.864	545.31	560.778	600.091	612.341	625.912	573.243	603.97	610.14	624.005	639.682	606.136	631.505	561.077
P17427	Ap2a2	AP-2 complex subunit alpha-2 OS=Mus musculus GN=Ap2a2 PE=1 SV=2	633.165	627.769	625.615	656.741	622.431	622.773	584.364	613.905	577.354	581.672	548.063	611.8	598.058	590.451	592.547	573.459	601.547	554.185	627.407	601.916	585.147	544.445	618.001	638.346
Q9Z1X2	Ptdss2	Phosphatidylserine synthase 2 OS=Mus musculus GN=Ptdss2 PE=1 SV=2	NA	NA	NA	645.67	NA	782.429	NA	NA	608.14	NA	524.869	464.882	NA	677.351	601.087	NA	NA	NA	NA	747.089	NA	NA	546.776	NA
Q8CD76	Klc1	Kinesin light chain 1 OS=Mus musculus GN=Klc1 PE=1 SV=1	605.753	590.231	595.57	594.522	596.756	627.603	619.097	604.816	594.938	592.563	630.044	525.918	523.888	517.273	594.164	565.103	577.574	543.44	579.608	613.725	611.645	565.987	624.467	591.171
P62137	Ppp1ca	Serine/threonine-protein phosphatase PP1-alpha catalytic subunit OS=Mus musculus GN=Ppp1ca PE=1 SV=1	636.627	643.405	630.645	640.202	637.189	631.871	586.411	611.554	589.26	611.658	614.414	636.318	596.42	612.469	620.816	635.301	633.234	589.396	631.486	604.846	615.777	571.908	605.199	609.684
Q63943	Mef2d	Myocyte-specific enhancer factor 2D OS=Mus musculus GN=Mef2d PE=1 SV=2	561.649	NA	681.831	629.731	685.362	563.485	NA	606.013	493.892	817.665	743.262	706.281	714.316	529.359	652.226	932.063	662.648	NA	NA	634.053	591.965	NA	509.386	658.267
A2A543	Cacnb1	Voltage-dependent L-type calcium channel subunit beta-1 OS=Mus musculus GN=Cacnb1 PE=1 SV=1	621.744	622.069	628.265	612.16	628.354	628.026	594.674	624.328	563.414	586.044	559.196	591.555	612.565	554.384	574.111	604.743	620.237	584.93	610.16	588.702	598.031	575.577	590.54	607.957
Q8VDP4	Ccar2	Cell cycle and apoptosis regulator protein 2 OS=Mus musculus GN=Ccar2 PE=1 SV=2	587.728	593.926	636.824	611.67	616.991	603.773	635.122	642.213	668.326	653.91	642.623	672.245	645.366	667.891	674.926	712.226	640.285	628.677	602.77	629.147	647.325	644.268	627.192	537.747
E9PW07	Cbarp	Voltage-dependent calcium channel beta subunit-associated regulatory protein OS=Mus musculus GN=Cbarp PE=1 SV=2	669.068	660.903	635.717	626.705	660.615	658.129	665.135	611.491	643.255	578.891	597.403	620.819	625.665	709.265	628.64	612.244	656.313	701.876	646.247	611.816	654.405	641.323	637.236	636.434
P67778	Phb	Prohibitin OS=Mus musculus GN=Phb PE=1 SV=1	614.374	609.749	630.634	598.011	574.631	645.572	576.728	622.497	584.045	556.389	564.312	504.675	540.3	512.538	567.254	524.3	536.525	551.61	602.404	641.182	619.018	616.135	610.687	683.479
Q4G5Y1	Klhdc2	Kelch domain-containing protein 2 OS=Mus musculus GN=Klhdc2 PE=2 SV=3	694.538	675.252	NA	423.431	NA	693.046	478.453	525.918	NA	NA	312.252	237.023	284.65	NA	638.732	NA	374.817	307.676	574.933	689.402	NA	593.243	NA	827.724
P54726	Rad23a	UV excision repair protein RAD23 homolog A OS=Mus musculus GN=Rad23a PE=1 SV=2	715.955	719.55	707.337	681.422	701.668	793.419	615.649	546.396	364.854	437.891	463.373	285.873	256.266	243.817	534.621	410.317	392.565	374.066	507.101	615.327	429.553	458.94	595.304	607.115
P58252	Eef2	Elongation factor 2 OS=Mus musculus GN=Eef2 PE=1 SV=2	608.493	614.684	610.861	642.979	596.743	614.847	609.845	613.944	591.392	617.456	605.979	647.227	573.205	586.573	599.823	581.753	588.424	577.251	646.161	616.833	602.45	609.536	600.505	622.269
P52795	Efnb1	Ephrin-B1 OS=Mus musculus GN=Efnb1 PE=1 SV=1	634.204	643.797	718.986	687.934	667.065	660.773	668.84	514.58	623.314	599.614	689.15	608.906	246.668	574.479	688.598	553.322	416.301	567.563	585.088	584.124	596.943	543.324	602.925	532.068
Q8C9H6	Strip2	Striatin-interacting proteins 2 OS=Mus musculus GN=Strip2 PE=1 SV=1	627.381	618.332	574.681	621.427	637.368	590.886	645.879	640.956	590.168	649.602	549.01	557.228	533.718	582.838	585.142	614.504	580.136	555.003	595.035	588.378	578.535	551.181	620.809	548.485
E9Q634	Myo1e	Unconventional myosin-Ie OS=Mus musculus GN=Myo1e PE=1 SV=1	NA	699.292	536.519	542.291	547.263	526.017	860.17	NA	824.784	637.114	632.528	560.748	NA	862.501	624.124	682.614	NA	913.104	832.119	545.127	863.382	820.814	647.947	NA
A0A0R4IZW7	Trmt1	tRNA (guanine(26)-N(2))-dimethyltransferase OS=Mus musculus GN=Trmt1 PE=1 SV=1	NA	619.669	667.691	508.136	636.987	499.488	696.791	NA	NA	689.022	756.605	669.678	NA	NA	537.923	736.631	NA	646.458	577.146	568.714	670.305	755.276	NA	NA
Q3U9D6	Exoc6	Exocyst complex component OS=Mus musculus GN=Exoc6 PE=1 SV=1	618.917	592.434	605.468	633.342	618.99	632.577	602.234	625.742	651.147	685.762	603.522	658.545	697.419	662.212	653.647	682.739	695.251	640.486	661.1	560.109	614.625	618.306	574.786	620.013
P30681	Hmgb2	High mobility group protein B2 OS=Mus musculus GN=Hmgb2 PE=1 SV=3	508.023	518.93	567.367	603.009	541.801	625.802	669.448	624.298	730.024	639.795	590.048	731.623	646.05	784.322	734.74	724.416	630.509	697.196	639.44	603.095	646.657	612.411	664.403	502.759
P46460	Nsf	Vesicle-fusing ATPase OS=Mus musculus GN=Nsf PE=1 SV=2	622.598	603.963	641.83	649.639	637.338	642.094	615.316	612.299	594.556	592.88	627.762	635.538	638.495	641.343	624.562	608.186	616.985	634.399	641.584	625.351	612.852	601.003	625.253	595.698
P56399	Usp5	Ubiquitin carboxyl-terminal hydrolase 5 OS=Mus musculus GN=Usp5 PE=1 SV=1	615.022	622.585	621.024	621.85	628.241	630.125	638.297	592.393	614.94	621.507	640.129	624.418	569.495	580.304	608.837	600.383	575.835	624.436	624.363	627.77	613.844	600.439	632.075	634.824
A7TU71	Shroom2	Protein Shroom2 OS=Mus musculus GN=Shroom2 PE=1 SV=1	646.383	623.3	620.338	667.362	654.609	612.838	641.887	621.203	676.688	606.672	643.572	680.052	656.852	665.629	640.959	639.46	630.733	654.145	619.361	597.4	618.338	634.791	635.384	612.674
O88967	Yme1l1	ATP-dependent zinc metalloprotease YME1L1 OS=Mus musculus GN=Yme1l1 PE=1 SV=1	583.496	548.553	567.926	582.948	559.682	597.161	586.216	645.922	698.824	666.043	680.942	617.304	643.173	715.304	700.968	706.968	599.744	551.956	580.254	608.356	619.46	590.476	606.947	557.254
Q9R226	Khdrbs3	KH domain-containing, RNA-binding, signal transduction-associated protein 3 OS=Mus musculus GN=Khdrbs3 PE=1 SV=1	631.165	630.293	638.373	645.84	623.956	624.618	638.803	628.229	644.179	612.571	676.338	635.065	631.53	591.111	691.321	630.188	638.345	650.233	592.675	606.073	633.435	612.849	632.246	537.821
B1ATI0	Aldh3a2	Aldehyde dehydrogenase OS=Mus musculus GN=Aldh3a2 PE=1 SV=1	583.501	572.701	583.615	570.889	592.938	566.518	578.091	605.413	662.132	640.248	630.642	672.843	705.566	733.823	610.112	611.198	637.609	662.35	618.521	599.951	612.811	654.524	605.916	591.889
Q3UER8	Fgg	Fibrinogen gamma chain OS=Mus musculus GN=Fgg PE=1 SV=1	573.6	619.087	512.016	589.011	681.33	608.51	756.316	593.973	773.031	650.762	619.538	606.684	581.323	559.68	634.903	525.64	597.145	580.887	563.686	697.665	775.597	632.56	614.332	592.761
B2RXQ9	Sorbs2	Sorbin and SH3 domain-containing protein 2 OS=Mus musculus GN=Sorbs2 PE=1 SV=1	568.225	565.38	563.68	574.845	567.116	620.718	651.68	631.539	673.4	636.067	678.046	604.559	594.495	632.772	633.944	595.285	579.858	668.509	610.106	630.906	639.044	662.962	634.714	592.931
P56387	Dynlt3	Dynein light chain Tctex-type 3 OS=Mus musculus GN=Dynlt3 PE=1 SV=1	542.6	NA	589.19	564.063	634.262	586.055	NA	609.598	NA	642.423	452.198	526.603	484.997	NA	672.511	702.419	605.911	NA	NA	589.741	595.783	NA	NA	694.616
A0A0R4J0S4	Llgl1	Lethal(2) giant larvae protein homolog 1 OS=Mus musculus GN=Llgl1 PE=1 SV=1	626.4	594.963	559.23	586.327	574.667	616.153	607.405	556.561	652.788	608.519	606.496	653.746	744.172	701.248	614.739	655.167	661.584	680.705	581.577	618.722	586.611	697.53	635.269	621.799
Q8VD24	Zcchc18	Zinc finger CCHC domain-containing protein 18 OS=Mus musculus GN=Zcchc18 PE=2 SV=1	764.194	NA	NA	602.941	NA	NA	NA	671.98	NA	NA	579.935	NA	695.198	NA	NA	NA	541.73	NA	NA	630.654	NA	NA	NA	561.021
F8WIV2	Serpinb6a	Serine (or cysteine) peptidase inhibitor, clade B, member 6a OS=Mus musculus GN=Serpinb6a PE=1 SV=1	633.063	589.823	646.37	639.879	609.931	633.763	553.673	616.717	592.451	572.16	542.52	507.243	505.587	563.998	569.15	559.057	579.054	542.129	573.297	605.798	618.872	565.59	615.597	680.634
Q9WV27	Atp1a4	Sodium/potassium-transporting ATPase subunit alpha-4 OS=Mus musculus GN=Atp1a4 PE=1 SV=3	610.141	585.142	592.165	599.035	606.058	581.59	653.152	642.315	614.263	597.737	663.242	593.13	553.421	574.957	631.745	611.512	582.961	584.45	606.049	656.05	627.044	591.086	631.191	555.073
Q921I1	Tf	Serotransferrin OS=Mus musculus GN=Tf PE=1 SV=1	580.983	632.885	639.228	557.854	608.903	620.811	588.431	613.947	666.545	599.462	657.357	544.76	618.456	653.119	678.547	575.544	634.117	655.083	650.353	712.316	699.362	693.371	642.135	601.516
O89086	Rbm3	RNA-binding protein 3 OS=Mus musculus GN=Rbm3 PE=1 SV=1	670.122	698.983	741.289	589.483	635.636	724.8	682.594	546.855	436.129	465.538	390.453	337.111	327.645	367.157	650.052	588.912	453.15	590.893	545.74	560.575	565.705	522.976	753.431	699.695
Q61586	Gpam	Glycerol-3-phosphate acyltransferase 1, mitochondrial OS=Mus musculus GN=Gpam PE=1 SV=2	544.468	561.052	721.629	665.304	715.904	630.972	496.576	597.389	476.849	605.464	596.784	573.05	543.15	691.771	628.246	600.34	556.253	522.141	581.536	581.394	745.964	561.08	574.907	524.401
Q6P4T0	Atg2a	Autophagy-related protein 2 homolog A OS=Mus musculus GN=Atg2a PE=1 SV=2	586.273	699.212	NA	536.18	NA	694.868	648.332	659.752	703.775	NA	642.984	679.059	635.187	675.889	615.163	NA	597.028	586.341	644.275	566.98	NA	649.592	671.65	664.268
Q08642	Padi2	Protein-arginine deiminase type-2 OS=Mus musculus GN=Padi2 PE=1 SV=2	695.638	574.022	537.453	517.657	635.401	513.316	614.17	703.282	767.926	563.07	615.291	859.036	613.95	603.888	523.93	607.307	603.044	565.159	548.407	753.591	606.907	728.208	711.821	606.73
E9PVN6	Gm20498	Uncharacterized protein OS=Mus musculus GN=Gm20498 PE=1 SV=1	529.436	515.109	613.225	524.703	551.197	615.394	600.947	557.37	664.476	675.492	548.325	735.562	693.047	673.421	765.431	640.669	632.349	633.847	617.056	638.973	656.335	614.536	538.939	642.056
Q9D024	Ccdc47	Coiled-coil domain-containing protein 47 OS=Mus musculus GN=Ccdc47 PE=1 SV=2	606.229	553.599	586.948	613.422	582.284	607.476	594.785	644.95	642.926	669.989	729.584	628.814	631.646	603.061	628.063	678.041	599.633	640.341	564.624	626.461	653.031	615.114	617.899	597.883
E0CZ72	Kif2a	Kinesin-like protein OS=Mus musculus GN=Kif2a PE=1 SV=1	638.949	612.233	617.915	629.067	597.254	635.356	589.635	615.401	605.406	594.321	561.034	609.437	561.683	561.985	571.266	564.847	571.596	548.55	604.442	623.321	616.703	580.006	621.954	629.246
Q9QZX7	Srr	Serine racemase OS=Mus musculus GN=Srr PE=1 SV=1	572.14	601.049	554.14	689.383	573.573	595.439	633.425	631.798	560.496	650.143	697.676	707.22	675.709	622.962	680.066	665.588	663.365	669.258	607.063	637.128	581.426	562.219	580.802	583.436
Q505B7	Zbtb8os	Protein archease OS=Mus musculus GN=Zbtb8os PE=1 SV=2	721.038	699.242	851.81	699.709	683.362	687.516	544.369	679.073	498.449	545.266	448.498	574.455	521.245	475.728	562.251	632.587	499.449	461.294	538.344	628.273	658.987	494.138	656.523	751.516
P62242	Rps8	40S ribosomal protein S8 OS=Mus musculus GN=Rps8 PE=1 SV=2	657.808	681.339	645.463	635.93	640.759	615.675	569.524	589.914	524.544	567.56	485.087	587.051	547.317	494.685	530.394	615.355	530.748	480.416	603.007	593.088	543.767	544.354	604.985	718.864
P47809	Map2k4	Dual specificity mitogen-activated protein kinase kinase 4 OS=Mus musculus GN=Map2k4 PE=1 SV=2	649.79	669.032	637.42	636.566	636.281	635.511	635.603	609.179	594.513	617.974	598.58	587.908	631.762	613.273	654.312	640.342	623.776	640.178	662.895	624.03	622.164	612.045	592.02	598.637
Q8CJ61	Cmtm4	CKLF-like MARVEL transmembrane domain-containing protein 4 OS=Mus musculus GN=Cmtm4 PE=1 SV=1	793.15	781.264	895.185	702.055	903.41	911.021	392.434	372.371	269.1	215.561	145.62	131.158	90.5362	284.923	262.582	466.261	212.342	210.846	430.977	572.715	392.057	314.122	599.3	679.708
Q8R151	Znfx1	NFX1-type zinc finger-containing protein 1 OS=Mus musculus GN=Znfx1 PE=1 SV=3	662.52	674.822	686.934	645.999	672.398	610.877	680.877	628.836	560.935	630.381	593.255	624.623	329.485	531.374	609.863	598.138	389.3	548.785	616.481	651.704	548.979	521.829	636.181	607.914
Q6ZQ38	Cand1	Cullin-associated NEDD8-dissociated protein 1 OS=Mus musculus GN=Cand1 PE=1 SV=2	650.198	630.757	634.683	635.351	625.693	600.764	627.745	631.644	584.577	600.405	612.759	615.115	608.387	607.575	587.817	596.992	629.973	604.913	622.357	620.635	633.625	604.43	596.049	606.819
Q62414	Neurod2	Neurogenic differentiation factor 2 OS=Mus musculus GN=Neurod2 PE=1 SV=3	NA	682.36	NA	NA	NA	681.761	685.766	NA	NA	NA	NA	779.35	NA	NA	670.641	NA	NA	665.545	928.055	NA	NA	887.274	NA	NA
Q61425	Hadh	Hydroxyacyl-coenzyme A dehydrogenase, mitochondrial OS=Mus musculus GN=Hadh PE=1 SV=2	578.727	549.963	674.002	544.668	589.28	598.985	580.009	605.227	622.091	542.043	589.695	523.133	673.234	731.775	633.996	598.375	660.443	619.876	587.129	579.424	633.704	620.211	579.915	622.179
Q8K370	Acad10	Acyl-CoA dehydrogenase family member 10 OS=Mus musculus GN=Acad10 PE=1 SV=1	670.303	498.351	629.434	500.401	591.965	604.159	552.887	592.187	640.723	646.152	617.118	594.127	695.225	681.812	669.817	625.897	680.562	659.258	631.925	595.194	649.983	574.029	610.576	603.588
A2AQ87	Shf	SH2 domain-containing adapter protein F (Fragment) OS=Mus musculus GN=Shf PE=1 SV=1	NA	NA	NA	548.488	NA	532.067	NA	NA	NA	NA	654.954	779.023	NA	NA	550.095	NA	NA	NA	NA	511.325	NA	NA	NA	NA
P62281	Rps11	40S ribosomal protein S11 OS=Mus musculus GN=Rps11 PE=1 SV=3	598.216	625.633	610.935	626.087	600.139	646.189	577.757	570.529	489.476	579.134	539.276	493.454	428.786	428.861	580.306	541.666	480.666	450.333	572.191	633.06	536.183	532.15	622.29	592.393
O88851	Rbbp9	Putative hydrolase RBBP9 OS=Mus musculus GN=Rbbp9 PE=1 SV=2	630.405	633.195	605.196	611.06	607.721	610.659	593.882	592.555	622.665	615.787	635.661	591.009	671.296	710.266	631.314	594.305	681.373	736.002	632.996	633.441	628.975	655.436	602.506	629.205
Q80TM6	R3hdm2	R3H domain-containing protein 2 OS=Mus musculus GN=R3hdm2 PE=1 SV=2	592.624	563.419	639.457	571.925	611.668	536.076	563.224	644.699	627.017	672.62	606.929	656.361	704.125	663.073	604.663	682.224	679.233	664.928	630.346	571.069	647.251	619.024	566.157	600.129
Q6PAM0	Prkab2	5'-AMP-activated protein kinase subunit beta-2 OS=Mus musculus GN=Prkab2 PE=1 SV=1	622.584	559.822	550.489	646.433	602.993	611.242	567.786	590.423	525.391	629.859	600.902	686.223	631.583	539.656	594.006	730.436	595.698	618.006	545.874	565.188	571.997	600.629	562.372	651.498
Q91YS4	Klc2	Kinesin light chain 2 OS=Mus musculus GN=Klc2 PE=1 SV=1	604.203	577.927	601.196	564.849	600.386	609.631	649.739	607.351	612.797	604.159	648.806	581.797	543.823	567.075	597.71	596.202	582.105	582.949	599.048	624.402	612.936	587.128	627.069	580.439
Q3UZR5	Atp2c1	Calcium-transporting ATPase OS=Mus musculus GN=Atp2c1 PE=1 SV=1	614.452	608.426	641.912	662.907	669.24	586.65	608.546	497.47	496.666	605.897	592.086	609.223	304.213	446.489	588.333	603.385	408.198	489.845	552.829	603.895	579.281	559.474	669.791	534.897
K3W4M4	Naxd	ATP-dependent (S)-NAD(P)H-hydrate dehydratase OS=Mus musculus GN=Naxd PE=1 SV=1	599.901	617.351	632.114	592.604	610.98	605.133	604.027	619.073	635.256	609.374	625.116	604.497	571.854	601.184	594.357	583.604	605.537	615.192	618.207	626.727	598.634	613.485	638.748	640.195
Q9Z2Z6	Slc25a20	Mitochondrial carnitine/acylcarnitine carrier protein OS=Mus musculus GN=Slc25a20 PE=1 SV=1	578.651	609.596	616.816	612.666	592.965	602.745	641.816	596.91	694.533	718.041	651.135	672.944	680.415	762.204	622.586	680.189	645.717	775.082	658.117	602.62	672.63	718.461	601.48	576.008
A2A7F6	Clcn6	Chloride channel protein OS=Mus musculus GN=Clcn6 PE=1 SV=1	632.628	715.105	573.643	561.221	705.234	584.253	758.697	667.651	665.721	685.126	553.027	744.39	511.993	542.387	553.893	640.061	556.657	587.754	679.848	673.954	658.118	695.029	677.592	526.668
Q9D3L3	Snap23	Synaptosomal-associated protein OS=Mus musculus GN=Snap23 PE=1 SV=1	670.187	685.472	716.649	638.018	581.302	717.897	644.358	630.35	364.67	396.652	472.131	321.767	275.372	201.799	499.462	383.501	393.19	275.282	423.796	641.248	505.148	393.113	730.804	719.626
G5E896	Edc4	Enhancer of mRNA decapping 4, isoform CRA_b OS=Mus musculus GN=Edc4 PE=1 SV=1	653.166	630.429	623.425	611.578	618.229	616.695	610.004	613.87	664.558	602.644	657.12	690.608	718.712	716.412	671.505	595.147	659.074	664.273	617.808	615.909	629.047	652.853	612.555	634.107
Q3UGY8	Arfgef3	Brefeldin A-inhibited guanine nucleotide-exchange protein 3 OS=Mus musculus GN=Arfgef3 PE=1 SV=1	691.189	669.953	626.793	663.213	653.863	641.925	621.875	606.073	578.473	644.341	597.143	595.001	648.416	562.38	589.429	589.824	615.788	595.737	630.968	593.223	607.201	623.51	589.85	671.758
P36552	Cpox	Oxygen-dependent coproporphyrinogen-III oxidase, mitochondrial OS=Mus musculus GN=Cpox PE=1 SV=2	651.771	673.899	660.211	520.142	672.169	596.657	647.26	609.377	591.726	600.558	657.968	648.724	662.177	668.204	659.785	653.107	653.584	636.324	665.508	522.873	563.489	578.662	600.981	683.739
Q61102	Abcb7	ATP-binding cassette sub-family B member 7, mitochondrial OS=Mus musculus GN=Abcb7 PE=1 SV=3	606.116	678.711	614.743	649.457	608.629	585.082	634.078	627.396	565.385	633.843	624.058	557.872	556.469	522.577	597.553	608.102	569.305	562.809	622.676	654.391	594.887	595.287	653.81	641.882
Q9EQS3	Mycbp	C-Myc-binding protein OS=Mus musculus GN=Mycbp PE=1 SV=5	563.33	NA	564.087	NA	650.554	NA	NA	707.736	696.734	678.585	NA	NA	639.777	761.558	NA	679.57	627.793	NA	NA	NA	760.093	NA	605.821	560.361
A0A087WSP5	Stat1	Signal transducer and activator of transcription OS=Mus musculus GN=Stat1 PE=1 SV=1	624.674	599.059	670.347	588.501	632.044	610.657	680.244	612.022	681.582	608.736	763.947	654.778	742.626	780.427	653.819	653.785	623.925	684.652	599.811	656.05	677.807	683.591	642.913	680.617
Q52KG3	Magee2	Melanoma antigen, family E, 2 OS=Mus musculus GN=Magee2 PE=1 SV=1	NA	NA	NA	617.297	NA	649.095	NA	NA	443.82	NA	713.504	661.207	NA	674.442	608.547	NA	NA	NA	NA	714.625	NA	NA	760.528	NA
P62821	Rab1A	Ras-related protein Rab-1A OS=Mus musculus GN=Rab1A PE=1 SV=3	640.221	648.53	642.54	650.315	633.12	652.436	547.418	577.706	478.347	534.094	535.708	554.167	535.706	505.931	550.692	527.591	539.451	496.231	597.527	583.574	548.517	525.132	565.632	634.831
Q8VE22	Mrps23	28S ribosomal protein S23, mitochondrial OS=Mus musculus GN=Mrps23 PE=1 SV=1	642.869	622.77	623.611	601.66	589.309	607.889	622.27	634.949	622.508	565.736	609.215	625.638	655.397	688.972	638.315	574.51	640.942	600.701	659.771	548.985	594.959	641.3	569.853	605.813
Q8BLY3	Lrfn3	Leucine-rich repeat and fibronectin type-III domain-containing protein 3 OS=Mus musculus GN=Lrfn3 PE=1 SV=1	747.645	NA	650.936	641.557	611.904	NA	NA	695.748	NA	628.945	575.417	NA	483.413	NA	NA	782.239	724.018	NA	NA	676.027	478.015	NA	NA	640.342
Q64687	St8sia1	Alpha-N-acetylneuraminide alpha-2,8-sialyltransferase OS=Mus musculus GN=St8sia1 PE=1 SV=2	NA	NA	528.476	NA	490.885	660.575	NA	NA	624.128	454.817	NA	582.831	NA	806.852	666.535	651.399	NA	NA	NA	NA	507.765	NA	633.863	NA
Q9JKN6	Nova1	RNA-binding protein Nova-1 OS=Mus musculus GN=Nova1 PE=1 SV=2	643.318	664.979	622.972	509.611	615.296	619.301	602.899	636.889	611.054	562.988	597.869	581.999	661.846	677.493	626.936	598.738	624.28	597.577	598.839	603.507	644.259	658.281	604.769	587.258
Q7TMI3	Uhrf2	E3 ubiquitin-protein ligase UHRF2 OS=Mus musculus GN=Uhrf2 PE=1 SV=1	NA	NA	729.966	NA	651.54	NA	NA	NA	607.447	550.565	NA	NA	NA	511.331	NA	506.741	NA	NA	NA	NA	481.015	NA	640.388	NA
Q5M8N0	Cnrip1	CB1 cannabinoid receptor-interacting protein 1 OS=Mus musculus GN=Cnrip1 PE=1 SV=1	572.594	602.835	615.998	574.86	629.043	602.511	573.752	568.032	619.626	606.593	561.798	743.156	818.939	779.682	617.051	616.008	637.631	659.728	688.808	623.368	584.383	638.449	559.375	617.693
P49817	Cav1	Caveolin-1 OS=Mus musculus GN=Cav1 PE=1 SV=1	814.548	795.223	750.876	NA	845.413	NA	568.981	662.91	575.707	492.627	NA	NA	648.207	639.418	NA	655.321	748.499	423.195	609.927	NA	647.256	537.38	581.134	792.845
P97412	Lyst	Lysosomal-trafficking regulator OS=Mus musculus GN=Lyst PE=1 SV=1	557.451	NA	551.163	620.027	594.353	585.022	NA	672.222	648.019	744.493	559.423	595.7	654.838	587.84	633.515	855.128	677.225	NA	NA	600.796	612.843	NA	616.749	523.605
Q8K3J1	Ndufs8	NADH dehydrogenase [ubiquinone] iron-sulfur protein 8, mitochondrial OS=Mus musculus GN=Ndufs8 PE=1 SV=1	634.936	622.687	580.072	592.414	604.395	655.423	605.794	601.278	562.332	614.16	582.285	461.885	487.416	547.962	565.678	592.977	525.542	519.577	640.065	646.573	639.03	553.013	625.959	599.463
Q63850	Nup62	Nuclear pore glycoprotein p62 OS=Mus musculus GN=Nup62 PE=1 SV=2	931.625	824.637	784.281	630.763	829.86	629.403	688.196	662.416	608.831	597.906	610.159	702.506	734.643	612.999	561.751	721.395	803.668	617.633	739.808	577.449	676.096	679.479	630	700.855
P70399	Tp53bp1	TP53-binding protein 1 OS=Mus musculus GN=Tp53bp1 PE=1 SV=3	640.525	674.01	598.882	591.859	602.911	600.468	640.57	593.986	657.952	623.736	641.576	601.947	582.177	633.707	598.976	551.812	598.299	588.514	549.333	583.9	576.586	608.707	637.813	630.144
O09126	Sema4d	Semaphorin-4D OS=Mus musculus GN=Sema4d PE=1 SV=2	619.686	652.246	637.038	662.499	633.411	683.572	656.27	593.474	667.771	648.141	700.388	545.443	594.279	628.18	710.435	705.152	611.753	704.699	633.645	622.544	607.84	654.164	706.406	574.035
O70166	Stmn3	Stathmin-3 OS=Mus musculus GN=Stmn3 PE=1 SV=1	557.709	593.419	580.576	614.526	613.629	NA	644.465	393.457	477.815	698.993	649.494	NA	122.235	371.375	NA	644.532	217.899	535.295	560.169	592.419	623.073	529.484	651.259	712.778
G3X9K3	Arfgef1	Brefeldin A-inhibited guanine nucleotide-exchange protein 1 OS=Mus musculus GN=Arfgef1 PE=1 SV=1	638.031	605.291	626.431	650.592	583.089	633.35	580.127	574.422	609.464	587.428	549.949	546.697	582.255	578.509	581.932	596.284	594.161	583.882	593.939	563.43	627.631	579.919	615.427	654.07
Q8R3C6	Rbm19	Probable RNA-binding protein 19 OS=Mus musculus GN=Rbm19 PE=1 SV=1	597.755	NA	NA	NA	NA	686.069	NA	632.214	NA	NA	NA	537.717	651.925	NA	644.289	NA	713.596	NA	NA	NA	NA	NA	NA	712.766
F6Q8A4	Rps6ka1	Ribosomal protein S6 kinase alpha-1 (Fragment) OS=Mus musculus GN=Rps6ka1 PE=1 SV=1	599.858	572.687	603.088	579.54	625.75	601.554	591.004	607.011	655.426	618.349	654.995	689.386	631.807	637.606	650.064	622.999	636.986	644.927	554.137	639.041	621.048	601.758	600.466	584.82
Q8CBB7	Ap1g1	AP-1 complex subunit gamma-1 OS=Mus musculus GN=Ap1g1 PE=1 SV=1	673.356	658.836	624.677	629.126	609.541	590.033	669.885	626.859	587.622	590.816	563.996	664.287	529.387	518.968	578.553	600.232	613.416	539.792	585.929	602.164	633.628	577.085	625.511	626.994
Q9CR16	Ppid	Peptidyl-prolyl cis-trans isomerase D OS=Mus musculus GN=Ppid PE=1 SV=3	621.939	612.561	645.249	629.711	641.788	646.52	622.709	617.005	576.957	618.509	585.461	489.359	506.607	517.94	590.526	570.832	552.796	553.769	630.797	626.782	615.293	605.142	623.146	591.07
Q6NXH9	Krt73	Keratin, type II cytoskeletal 73 OS=Mus musculus GN=Krt73 PE=1 SV=1	683.085	616.36	697.678	693.863	677.764	719.195	465.761	535.059	463.282	427.709	522.932	364.372	327.542	353.725	488.764	458.504	401.692	310.912	551.575	735.034	520.216	560.551	697.762	661.777
P35285	Rab22a	Ras-related protein Rab-22A OS=Mus musculus GN=Rab22a PE=1 SV=2	671.845	619.925	664.561	643.828	628.609	676.916	540.265	569.978	591.551	585.075	612.879	559.51	577.653	591.48	540.389	574.574	576.305	519.07	612.56	623.637	602.101	549.705	634.781	585.737
Q80V26	Impad1	Inositol monophosphatase 3 OS=Mus musculus GN=Impad1 PE=1 SV=1	563.277	537.888	600.276	594.431	618.204	569.801	603.356	597.341	628.307	625.679	836.457	618.824	617.129	666.131	621.108	613.218	584.869	484.577	609.339	683.523	634.338	608.024	579.247	539.027
O09167	Rpl21	60S ribosomal protein L21 OS=Mus musculus GN=Rpl21 PE=1 SV=3	596.647	619.037	597.233	637.585	599.462	614.598	567.545	588.087	568.677	625.493	557.757	523.346	592.084	579.608	581.541	564.008	550.853	562.728	621.921	626.514	583.664	633.867	619.32	710.955
Q811P8	Arhgap32	Rho GTPase-activating protein 32 OS=Mus musculus GN=Arhgap32 PE=1 SV=2	628.682	599.706	610.909	638.413	630.554	651.654	643.927	624.629	633.819	627.931	618.614	584.52	631.584	670.976	624.762	627.53	614.726	631.465	619.652	588.483	625.547	590.753	598.677	601.486
Q9CQ79	Txndc9	Thioredoxin domain-containing protein 9 OS=Mus musculus GN=Txndc9 PE=1 SV=1	612.109	664.263	736.583	553.121	686.408	650.701	589.476	550.519	584.248	570.132	637.19	737.649	460.685	557.687	678.87	542.466	411.27	481.181	635.174	609.507	570.601	567.653	538.98	594.828
P35235	Ptpn11	Tyrosine-protein phosphatase non-receptor type 11 OS=Mus musculus GN=Ptpn11 PE=1 SV=2	639.042	595.299	627.12	638.551	596.846	601.106	616.298	648.455	635.346	591.815	660.237	596.835	583.279	603.115	594.997	576.558	604.17	570.122	593.634	679.254	604.787	631.106	644.569	637.134
Q8R164	Bphl	Valacyclovir hydrolase OS=Mus musculus GN=Bphl PE=1 SV=1	602.298	553.133	577.463	574.417	554.771	580.893	582.622	597.381	625.672	620.087	570.995	624.562	632.691	619.386	616.943	596.98	604.737	619.658	612.511	575.611	625.899	606.135	597.638	577.783
E9PV24	Fga	Fibrinogen alpha chain OS=Mus musculus GN=Fga PE=1 SV=1	541.979	617.159	558.087	543.174	721.658	575.673	775.639	602.972	684.032	622.373	587.246	656.723	645.207	610.114	686.212	483.46	618.076	642.212	585.163	704.225	913.754	682.207	596.569	571.29
Q91V14	Slc12a5	Solute carrier family 12 member 5 OS=Mus musculus GN=Slc12a5 PE=1 SV=2	684.229	710.99	632.691	630.965	658.567	653.673	621.939	611.745	569.672	583.927	568.314	613.687	553.859	566.102	585.952	571.294	583.332	522.006	597.937	624.297	597.361	583.248	630.539	667.473
Q8BGD9	Eif4b	Eukaryotic translation initiation factor 4B OS=Mus musculus GN=Eif4b PE=1 SV=1	625.875	559.936	598.558	596.644	595.129	688.814	711.669	624.643	648.837	667.518	601.295	367.18	499.077	506.323	643.232	643.326	546.009	639.82	566.116	676.32	670.956	686.318	678.422	628.86
Q9D1B9	Mrpl28	39S ribosomal protein L28, mitochondrial OS=Mus musculus GN=Mrpl28 PE=1 SV=3	569.844	615.031	610.258	607.664	587.205	573.621	657.461	628.588	607.543	601.202	653.917	617.899	651.486	656.144	689.018	670.973	624.914	688.462	663.655	619.153	653.468	646.592	563.628	541.921
Q8C080	Snx16	Sorting nexin-16 OS=Mus musculus GN=Snx16 PE=1 SV=2	600.383	598.832	576.617	571.35	553.647	613.24	615.509	636.241	608.257	603.424	589.202	526.253	557.936	543.213	513.958	533.524	514.607	566.761	599.922	618.921	577.782	613.584	633.842	611.182
A0A1L1ST33	Uncharacterized protein OS=Mus musculus	Uncharacterized protein OS=Mus musculus PE=4 SV=1	661.202	586.9	553.362	561.916	496.865	623.095	625.441	682.568	631.603	626.129	817.599	639.195	615.972	592.007	717.891	711.661	619.297	622.095	603.06	622.413	593.229	583.231	617.036	559.001
P26645	Marcks	Myristoylated alanine-rich C-kinase substrate OS=Mus musculus GN=Marcks PE=1 SV=2	668.55	616.305	774.507	673.484	685.365	591.935	583.179	569.249	503.763	543.007	536.035	558.831	493.24	363.932	553.42	475.578	405.703	529.731	485.524	629.041	421.123	541.107	594.679	578
A0A0R4J117	Igsf8	Immunoglobulin superfamily member 8 OS=Mus musculus GN=Igsf8 PE=1 SV=1	644.441	700.121	650.686	705.358	676.728	679.614	614.188	565.595	547.071	535.192	544.354	579.185	574.592	648.95	597.555	594.063	593.751	567.643	606.99	647.771	562.517	570.993	652.624	650.715
Q80WM4	Hapln4	Hyaluronan and proteoglycan link protein 4 OS=Mus musculus GN=Hapln4 PE=2 SV=2	617.085	660.034	666.395	613.86	695.936	613.761	649.591	619.542	688.808	489.95	626.752	578.648	708.485	750.877	642.33	654.69	550.793	513.562	642.831	688.727	609.759	683.502	711.145	558.19
O88545	Cops6	COP9 signalosome complex subunit 6 OS=Mus musculus GN=Cops6 PE=1 SV=1	620.486	612.617	623.64	614.126	626.739	597.654	609.959	600.497	606.948	623.397	648.788	663.574	656.125	652.53	612.365	615.293	629.752	640.444	657.557	637.772	624.728	628.574	605.576	607.088
Q61578	Fdxr	NADPH:adrenodoxin oxidoreductase, mitochondrial OS=Mus musculus GN=Fdxr PE=1 SV=1	635.012	553.096	606.099	565.747	581.107	585.658	610.986	644.59	681.597	631.855	619.925	602.295	675.686	661.567	647.18	654.92	646.615	655.275	618.863	566.726	604.362	633.138	579.373	589.894
A0A0R4J0B6	Abcg2	ATP-binding cassette sub-family G member 2 OS=Mus musculus GN=Abcg2 PE=1 SV=1	621.678	630.777	655.987	658.406	655.13	609.998	597.659	565.096	573.508	592.537	632.671	615.947	715.351	671.579	600.493	579.56	668.827	629.083	593.96	583.705	575.57	635.685	597.149	596.855
Q8VHN8	Nudt16l1	Tudor-interacting repair regulator protein OS=Mus musculus GN=Nudt16l1 PE=1 SV=2	610.225	NA	638.307	NA	694.939	638.761	NA	647.394	NA	538.725	NA	555.275	583.781	NA	534.611	600.512	620.465	NA	NA	NA	623.746	NA	NA	749.939
Q9D1K2	Atp6v1f	V-type proton ATPase subunit F OS=Mus musculus GN=Atp6v1f PE=1 SV=2	600.536	652.342	654.718	644.739	610.933	594.607	703.731	656.84	682.79	649.427	706.792	680.177	649.435	690.341	682.495	713.416	654.834	698.857	685.625	673.647	704.629	638.991	659.386	551.608
Q91W29	Cox4i2	Cytochrome c oxidase subunit 4 isoform 2, mitochondrial OS=Mus musculus GN=Cox4i2 PE=1 SV=1	NA	604.867	NA	596.156	NA	564.628	781.312	NA	637.728	NA	692.686	657.766	NA	566.042	671.51	NA	NA	533.132	565.844	682.216	NA	656.596	702.225	NA
Q9CQU3	Rer1	Protein RER1 OS=Mus musculus GN=Rer1 PE=1 SV=1	550.341	576.098	614.16	617.986	628.883	618.926	601.675	613.475	621.73	638.915	620.933	723.671	612.112	672.68	647.849	621.05	631.326	544.033	603.898	615.042	594.637	607.28	559.665	570.695
Q3UH60	Dip2b	Disco-interacting protein 2 homolog B OS=Mus musculus GN=Dip2b PE=1 SV=1	606.448	634.469	617.856	616.029	648.167	597.084	701.78	618.471	631.31	621.874	637.828	616.717	627.715	631.262	623.338	654.126	631.132	652.109	642.966	634.721	644.434	633.602	627.827	573.578
Q9DB16	Cab39l	Calcium-binding protein 39-like OS=Mus musculus GN=Cab39l PE=1 SV=3	686.156	730.147	623.007	749.485	682.645	826.736	621.855	666.289	572.547	581.67	562.576	317.552	590.774	562.337	502.204	610.231	671.513	438.744	537.706	706.976	604.641	508.457	656.947	651.756
Q9JJK2	Lancl2	LanC-like protein 2 OS=Mus musculus GN=Lancl2 PE=1 SV=1	616.614	592.001	600.15	645.753	604.038	610.917	582.125	612.869	572.503	598.374	569.721	632.16	613.385	560.746	583.185	610.517	635.126	569.594	588.029	584.084	608.044	548.33	598.337	632.556
Q64362	Aktip	AKT-interacting protein OS=Mus musculus GN=Aktip PE=1 SV=1	NA	641.788	737.816	674.773	693.204	600.011	522.706	NA	NA	695.122	544.494	656.61	NA	NA	629.594	582.991	NA	478.502	556.341	714.106	603.66	495.87	NA	NA
Q9QYB5-2	Add3	Isoform 1 of Gamma-adducin OS=Mus musculus GN=Add3	608.964	652.863	580.143	657.931	570.314	590.402	646.608	611.445	617.893	636.503	660.426	680.106	691.286	657.195	632.533	655.76	637.401	661.076	619.574	643.062	600.14	620.131	629.701	636.818
Q8C5N9	Hsd17b7	3-keto-steroid reductase OS=Mus musculus GN=Hsd17b7 PE=1 SV=1	629.826	646.183	NA	NA	NA	532.734	589.389	603.955	NA	NA	NA	818.69	641.298	NA	685.211	NA	598.213	611.686	678.393	NA	NA	649.75	NA	611.815
P62631	Eef1a2	Elongation factor 1-alpha 2 OS=Mus musculus GN=Eef1a2 PE=1 SV=1	606.835	635.861	597.038	623.971	616.422	598.146	622.562	615.025	568.847	578.756	584.106	658.941	606.103	565.846	584.166	549.301	574.781	585.862	632.566	646.338	603.865	613.579	632.599	639.494
Q9WVA4	Tagln2	Transgelin-2 OS=Mus musculus GN=Tagln2 PE=1 SV=4	602.345	590.027	599.557	582.467	591.777	636.444	624.328	601.751	593.151	624.102	569.974	558.119	442.791	485.61	607.057	589.032	533.213	590.668	565.8	613.76	626.015	622.157	595.548	561.437
Q3TCN2	Plbd2	Putative phospholipase B-like 2 OS=Mus musculus GN=Plbd2 PE=1 SV=2	620.715	625.687	585.127	703.945	647.566	668.321	635.842	622.528	636.879	596.275	693.584	697.368	667.811	685.358	666.628	582.835	639.183	597.906	675.199	649.846	647.323	627.665	567.167	596.029
Q6NXL5	Acap3	ArfGAP with coiled-coil, ankyrin repeat and PH domains 3 OS=Mus musculus GN=Acap3 PE=1 SV=1	652.316	556.373	606.239	666.108	575.919	669.152	467.555	583.699	529.089	647.08	635.281	549.495	684.379	623.982	548.749	617.317	637.353	570.574	644.304	589.844	615.155	521.429	593.337	691.672
G3X9V4	Grin2b	Glutamate receptor ionotropic, NMDA 2B OS=Mus musculus GN=Grin2b PE=1 SV=1	630.694	636.49	638.729	621.485	650.506	643.728	674.067	643.168	607.696	658.109	632.021	667.164	592.422	562.975	668.745	615.106	577.594	637.486	665.554	597.665	627.687	643.107	627.852	596.209
Q91VR7	Map1lc3a	Microtubule-associated proteins 1A/1B light chain 3A OS=Mus musculus GN=Map1lc3a PE=1 SV=1	601.359	601.386	637.349	595.562	617.864	584.978	627.128	623.51	561.118	564.772	630.999	693.03	606.696	627.419	598.758	562.834	592.305	609.83	658.258	655.211	587.742	584.661	584.569	575.815
P13439	Umps	Uridine 5'-monophosphate synthase OS=Mus musculus GN=Umps PE=1 SV=3	599.447	665.461	605.39	597.406	564.794	550.058	653.467	606.471	702.279	587.533	603.841	624.019	615.415	695.559	614.413	567.2	611.726	690.309	667.857	576.361	633.478	724.277	696.799	606.728
E9Q3M9	2010300C02Rik	RIKEN cDNA 2010300C02 gene OS=Mus musculus GN=2010300C02Rik PE=1 SV=1	535.319	600.048	627.275	619.76	641.249	620.473	651.066	646.332	620.388	702.398	728.429	690.179	687.502	652.79	681.253	655.931	664.432	742.042	587.982	567.882	617.978	639.946	627.415	573.891
E9QKD1	Nol8	Nucleolar protein 8 OS=Mus musculus GN=Nol8 PE=1 SV=1	NA	NA	NA	712.784	NA	812.789	NA	NA	NA	NA	671.953	679.195	NA	NA	663.485	NA	NA	NA	NA	643.323	NA	NA	NA	NA
A0A0R3P9D0	Plppr3	Phospholipid phosphatase-related protein type 3 OS=Mus musculus GN=Plppr3 PE=1 SV=1	596.686	690.819	667.474	586.796	681.838	688.04	769.816	539.52	636.577	578.821	583.548	567.911	671.708	659.96	652.59	633.558	635.967	753.69	572.75	605.462	564.9	670.558	553.443	517.351
Q8BHS6	Armcx3	Armadillo repeat-containing X-linked protein 3 OS=Mus musculus GN=Armcx3 PE=1 SV=1	573.55	603.728	578.371	610.241	605.403	599.527	650.965	593.729	548.702	645.668	630.529	645.56	616.049	644.906	646.329	689.778	635.178	631.402	669.852	663.889	625.089	647.93	572.35	564.812
Q8C878	Uba3	NEDD8-activating enzyme E1 catalytic subunit OS=Mus musculus GN=Uba3 PE=1 SV=2	604.343	575.281	595.362	592.487	631.715	575.317	636.053	617.317	669.044	676.938	642.112	656.868	598.727	674.789	606.536	639.163	647.88	673.434	608.474	613.176	655.252	652.914	649.431	636.331
P16014	Chgb	Secretogranin-1 OS=Mus musculus GN=Chgb PE=1 SV=2	635.953	765.621	835.954	NA	815.996	NA	630.122	565.206	612.893	726.892	NA	NA	302.711	596.042	NA	676.984	399.076	469.293	495.947	NA	702.021	583.284	880.425	606.658
O35075	Dscr3	Down syndrome critical region protein 3 homolog OS=Mus musculus GN=Dscr3 PE=1 SV=1	613.297	582.344	634.601	598.998	571.573	642.344	618.025	645.737	577.471	638.505	608.495	574.433	586.712	583.523	606.066	652.125	604.512	623.273	640.881	724.887	658.455	606.397	584.749	608.701
A0A1B0GSX0	Ldha	L-lactate dehydrogenase OS=Mus musculus GN=Ldha PE=1 SV=1	598.394	593.337	607.477	686.438	649.988	649.213	626.261	632.97	550.563	641.425	629.801	603.524	542.759	546.044	622.285	596.431	581.691	557.439	617.685	643.157	590.733	540.755	636.298	565.362
Q9Z2U0	Psma7	Proteasome subunit alpha type-7 OS=Mus musculus GN=Psma7 PE=1 SV=1	621.613	639.13	638.562	648.266	638.397	638.44	657.982	647.619	633.902	623.827	690.343	680.871	592.939	595.966	611.626	661.18	623.297	655.833	622.738	621.22	643.602	619.298	656.378	588.785
F6ZGR6	D430041D05Rik	RIKEN cDNA D430041D05 gene (Fragment) OS=Mus musculus GN=D430041D05Rik PE=1 SV=1	606.124	668.134	613.874	679.041	688.8	669.737	676.932	612.233	540.115	601.457	616.748	590.031	604.87	544.98	636.698	664.688	633.828	636.149	618.046	640.677	598.248	567.083	569.764	617.16
P62075	Timm13	Mitochondrial import inner membrane translocase subunit Tim13 OS=Mus musculus GN=Timm13 PE=1 SV=1	637.915	578.098	610.578	577.268	552.775	631.01	580.289	633.638	588.975	601.042	506.077	536.329	528.483	567.897	526.771	560.339	554.622	532.091	590.547	583.073	598.761	519.676	584.884	592.984
Q9CQJ4	Rnf2	E3 ubiquitin-protein ligase RING2 OS=Mus musculus GN=Rnf2 PE=1 SV=1	NA	595.972	NA	537.207	NA	627.692	506.333	NA	466.181	NA	529.005	621.924	NA	392.982	556	NA	NA	334.202	450.043	585.859	NA	497.44	668.403	NA
O88544	Cops4	COP9 signalosome complex subunit 4 OS=Mus musculus GN=Cops4 PE=1 SV=1	649.405	635.952	642.601	629.145	658.707	632.896	629.266	616.274	624.605	618.701	601.669	645.994	618.274	639.051	612.243	592.467	644.393	623.419	644.852	619.479	632.297	642.92	631.817	657.207
A0A140LIJ1	Fam168a	Protein FAM168A OS=Mus musculus GN=Fam168a PE=1 SV=1	NA	NA	NA	717.036	NA	675.19	NA	NA	NA	NA	402.944	195.886	NA	NA	475.55	NA	NA	NA	NA	604.376	NA	NA	NA	NA
Q8BIV3	Ranbp6	Ran-binding protein 6 OS=Mus musculus GN=Ranbp6 PE=1 SV=3	625.829	619.148	636.526	619.571	598.539	650.297	574.012	593.152	610.338	552.485	546.641	659.858	663.278	691.755	672.732	603.084	645.599	579.423	563.943	557.659	575.769	604.832	591.27	603.609
P15532	Nme1	Nucleoside diphosphate kinase A OS=Mus musculus GN=Nme1 PE=1 SV=1	622.564	631.326	634.681	691.355	655.013	634.234	692.222	664.385	609.901	648.861	648.677	626.48	557.245	582.886	648.825	646.825	611.85	597.704	617.079	605.993	606.762	578.974	623.371	552.616
Q9QUM9	Psma6	Proteasome subunit alpha type-6 OS=Mus musculus GN=Psma6 PE=1 SV=1	659.285	688.767	666.987	699.704	667.54	660.376	633.878	645.693	576.475	607.504	584.102	519.792	561.981	557.451	575.977	622.536	622.601	563.379	646.764	638.173	621.495	576.022	660.704	626.992
Q9CRB9	Chchd3	MICOS complex subunit Mic19 OS=Mus musculus GN=Chchd3 PE=1 SV=1	565.425	554.239	582.725	591.866	592.52	572.914	635.126	605.758	630.964	677.406	641.329	661.796	532.081	579.824	632.753	668.089	555.185	653.997	642.099	644.252	647.489	613.941	617.648	559.815
E9QL53	Cit	Citron Rho-interacting kinase OS=Mus musculus GN=Cit PE=1 SV=1	651.608	646.693	638.01	647.076	662.86	638.18	606.57	636.994	640.527	614.026	650.807	585.47	613.949	639.793	616.775	630.452	627.757	620.031	618.712	652.295	633.628	639.076	602.582	595.115
Q0VGY8	Tanc1	Protein TANC1 OS=Mus musculus GN=Tanc1 PE=1 SV=2	630.842	485.207	609.663	659.026	650.402	626.801	637.535	597.607	664.114	701.921	668.825	616.006	595.22	669.926	646.934	699.81	604.338	662.79	625.147	653.268	661.786	629.834	644.033	643.636
Q9R0Q7	Ptges3	Prostaglandin E synthase 3 OS=Mus musculus GN=Ptges3 PE=1 SV=1	658.772	607.766	639.018	613.75	573.455	633.91	529.539	572.844	560.283	587.019	559.069	582.119	522.137	563.272	559.697	562.563	603.885	588.993	627.893	572.601	541.988	594.218	610.548	594.795
P58389	Ptpa	Serine/threonine-protein phosphatase 2A activator OS=Mus musculus GN=Ptpa PE=1 SV=1	682.39	725.915	644.812	723.001	658.607	683.283	652.145	627.236	565.649	572.219	531.238	567.541	522.651	561.214	630.427	610.012	580.858	514.368	571.988	652.375	588.597	545.611	632.386	673.287
Q9WU79	Prodh	Proline dehydrogenase 1, mitochondrial OS=Mus musculus GN=Prodh PE=1 SV=2	616.904	588.854	635.07	579.489	617.458	616.594	598.393	633.432	594.653	580.242	610.355	480.822	597.546	631.811	641.783	663.729	644.213	649.161	531.454	588.861	607.571	614.435	639.569	630.011
Q80Y14	Glrx5	Glutaredoxin-related protein 5, mitochondrial OS=Mus musculus GN=Glrx5 PE=1 SV=2	624.693	607.191	634.133	547.628	621.981	586.598	580.125	614.7	575.718	595.267	663.851	704.953	588.749	630.699	494.663	594.134	675.231	613.469	621.205	556.386	597.505	603.462	550.59	782.905
P21661	Pcsk2	Neuroendocrine convertase 2 OS=Mus musculus GN=Pcsk2 PE=1 SV=1	672.1	635.561	672.288	709.952	654.368	811.048	535.654	531.312	576.68	528.766	591.539	292.123	479.197	599.025	497.064	595.52	512.503	622.726	551.79	667.811	563.387	641.743	618.798	616.309
Q99KQ4	Nampt	Nicotinamide phosphoribosyltransferase OS=Mus musculus GN=Nampt PE=1 SV=1	600.585	612.641	608.984	605.003	610.19	587.021	614.355	629.583	617.844	602.83	553.144	607.455	647.018	597.949	600.741	585.788	624.337	611.244	655.534	607.819	639.102	624.187	598.427	634.97
P97438	Kcnk2	Potassium channel subfamily K member 2 OS=Mus musculus GN=Kcnk2 PE=1 SV=3	NA	NA	571.779	624.917	775.497	NA	NA	NA	758.307	491.428	656.855	NA	NA	509.886	NA	470.115	NA	NA	NA	807.571	717.89	NA	754.162	NA
P14069	S100a6	Protein S100-A6 OS=Mus musculus GN=S100a6 PE=1 SV=3	588.936	595.756	753.029	832.919	779.111	751.212	529.923	457.849	418.225	321.153	386.592	321.006	235.553	287.263	544.667	364.014	383.639	250.397	479.143	647.896	376.906	366.708	595.868	655.278
Q9CWZ3	Rbm8a	RNA-binding protein 8A OS=Mus musculus GN=Rbm8a PE=1 SV=4	439.254	568.382	NA	631.047	NA	709.739	685.96	796.132	NA	NA	621	529.923	327.822	NA	537.193	NA	344.308	427.453	466.101	561.358	NA	562.745	NA	910.233
O35226-2	Psmd4	Isoform Rpn10B of 26S proteasome non-ATPase regulatory subunit 4 OS=Mus musculus GN=Psmd4	578.781	592.498	597.034	582.354	588.236	569.946	611.791	621.169	645.593	620.917	630.179	703.681	685.866	653.463	608.262	618.028	618.607	639.478	655.865	613.802	621.787	621.58	595.715	576.269
Q8CBX0	Tmem63c	Calcium permeable stress-gated cation channel 1 OS=Mus musculus GN=Tmem63c PE=1 SV=1	612.014	634.092	682.228	698.135	651.727	714.26	643.728	559.858	507.683	465.897	411.054	170.784	277.03	342.257	483.392	499.732	349.581	550.073	516.658	608.136	585.689	540.563	682.519	604.769
P35802	Gpm6a	Neuronal membrane glycoprotein M6-a OS=Mus musculus GN=Gpm6a PE=1 SV=1	684.736	657.082	698.194	709.346	665.278	688.766	556.793	616.569	460.066	495.9	542.58	460.391	457.911	475.798	555.436	535.743	587.717	472.715	555.324	579.23	491.359	451.55	600.293	616.034
Q564G0	Guk1	Guanylate kinase OS=Mus musculus GN=Guk1 PE=1 SV=1	642.016	629.09	643.709	629.51	601.838	664.188	569.653	637.434	529.953	595.111	564.435	491.538	578.805	510.296	541.238	575.631	598.356	589.527	640.741	632.513	573.217	581.045	655.869	658.762
P47757-4	Capzb	Isoform 3 of F-actin-capping protein subunit beta OS=Mus musculus GN=Capzb	582.214	570.337	625.862	593.296	613.55	633.439	633.57	624.554	623.222	654.337	634.916	629.06	629.135	650.069	591.024	654.98	615.086	681.374	654.503	597.393	621.754	587.174	585.965	562.079
Q61330	Cntn2	Contactin-2 OS=Mus musculus GN=Cntn2 PE=1 SV=2	621.568	637.423	610.4	625.461	622.487	585.622	665.844	608.172	635.217	631.668	651.284	651.738	620.076	707.384	597.043	649.58	611.616	668.083	708.855	685.454	641.603	700.001	628.487	563.053
Q8VDK1	Nit1	Nitrilase homolog 1 OS=Mus musculus GN=Nit1 PE=1 SV=2	553.667	616.009	648.922	641.415	629.163	542.932	649.503	646.125	604.268	591.64	649.808	524.825	488.933	554.385	675.306	613.043	611.376	579.275	631.163	655.249	655.643	554.813	627.048	568.494
S4R189	Arhgef40	Rho guanine nucleotide exchange factor 40 OS=Mus musculus GN=Arhgef40 PE=1 SV=1	NA	NA	NA	589.244	NA	658.61	NA	NA	NA	NA	742.548	673.616	NA	NA	905.201	NA	NA	NA	NA	682.692	NA	NA	NA	NA
E9Q1V2	Cpne5	Copine-5 (Fragment) OS=Mus musculus GN=Cpne5 PE=1 SV=1	600.186	681.483	569.551	663.335	682.662	655.125	626.624	604.204	593.77	626.995	579.506	666.908	709.509	656.608	607.147	655.071	660.78	524.225	596.974	588.185	568.549	569.416	583.729	622.758
Q9D8E6	Rpl4	60S ribosomal protein L4 OS=Mus musculus GN=Rpl4 PE=1 SV=3	593.328	600.156	621.611	568.217	610.147	605.061	613.476	615.306	605.535	607.006	570.128	599.564	597.864	603.973	591.582	590.608	572.704	575.636	600.072	596.56	618.688	581.145	600.318	583.927
P62827	Ran	GTP-binding nuclear protein Ran OS=Mus musculus GN=Ran PE=1 SV=3	587.165	585.819	572.964	574.725	564.378	562.58	567.942	603.336	585.927	624.952	603.89	634.65	575.219	640.638	580.808	596.735	579.989	596.784	636.071	619.059	603.509	584.71	583.284	564.091
P43276	Hist1h1b	Histone H1.5 OS=Mus musculus GN=Hist1h1b PE=1 SV=2	602.569	533.019	667.496	496.179	591.265	659.847	683.665	626.626	545.888	602.317	652.683	440.201	442.914	384.284	539.572	501.404	515.792	669.75	526.745	536.378	536.628	575.995	476.133	537.559
Q52KI8	Srrm1	Serine/arginine repetitive matrix protein 1 OS=Mus musculus GN=Srrm1 PE=1 SV=2	597.438	658.936	535.181	552.582	558.909	569.822	620.251	551.809	636.03	619.479	628.863	769.816	777.734	679.28	680.812	585.503	702.013	772.3	556.722	570.875	551.142	664.154	644.498	664.213
Q62318	Trim28	Transcription intermediary factor 1-beta OS=Mus musculus GN=Trim28 PE=1 SV=3	641.356	675.565	625.645	582.509	606.459	618.237	600.519	599.973	594.402	579.675	590.442	630.054	663.882	659.819	596.42	568.896	628.854	611.617	590.84	601.953	604.261	613.843	581.049	631.25
Q9EPC1	Parva	Alpha-parvin OS=Mus musculus GN=Parva PE=1 SV=1	639.418	628.619	682.558	645.759	621.878	661.54	629.326	611.269	615.952	568.381	547.404	581.295	658.052	608.713	602.982	607.605	626.705	572.224	630.565	555.142	588.493	589.804	639.325	689.792
Q9WU01	Khdrbs2	KH domain-containing, RNA-binding, signal transduction-associated protein 2 OS=Mus musculus GN=Khdrbs2 PE=1 SV=1	613.543	551.191	621.104	557.358	579.087	587.601	585.242	626.86	654.053	591.953	644.982	620.34	577.846	522.503	652.965	647.183	623.949	672.329	594.204	565.454	640.981	603.085	630.957	500.708
P35436	Grin2a	Glutamate receptor ionotropic, NMDA 2A OS=Mus musculus GN=Grin2a PE=1 SV=2	599.922	588.772	604.818	650.99	607.716	636.765	617.133	619.8	597.769	633.057	618.94	676.015	585.852	576.133	599.27	632.973	604.305	588.965	640.33	610.115	609.532	606.039	601.313	628.158
B1AX58	Pls3	Plastin-3 OS=Mus musculus GN=Pls3 PE=1 SV=1	613.661	578.105	602.583	580.618	572.875	578.195	633.583	633.863	614.086	601.348	625.291	609.935	591.05	589.409	576.126	598.445	618.05	605.486	615.867	645.684	652.511	617.461	642.876	606.982
Q9EQH3	Vps35	Vacuolar protein sorting-associated protein 35 OS=Mus musculus GN=Vps35 PE=1 SV=1	642.555	680.885	654.289	660.643	607.989	629.394	642.467	643.057	583.582	587.491	597.879	564.969	543.194	529.035	597.958	619.293	606.48	568.857	611.108	604.559	647.074	583.706	641.822	638.37
P62852	Rps25	40S ribosomal protein S25 OS=Mus musculus GN=Rps25 PE=1 SV=1	593.467	616.798	628.278	571.469	582.913	584.335	603.735	600.051	652.037	595.473	622.105	687.773	670.313	705.653	634.8	596.303	611.357	650.088	630.568	604.566	634.774	634.618	572.867	574.379
Q9EQZ6-3	Rapgef4	Isoform 3 of Rap guanine nucleotide exchange factor 4 OS=Mus musculus GN=Rapgef4	676.012	603.645	658.227	613.766	613.151	622.89	581.275	608.154	591.979	567.815	538.081	604.066	619.064	573.932	562.139	570.899	627.515	594.83	624.526	587.754	562.991	593.03	608.345	718.926
Q8BY89	Slc44a2	Choline transporter-like protein 2 OS=Mus musculus GN=Slc44a2 PE=1 SV=2	536.249	562.471	503.573	559.44	523.305	592.737	715.25	694.951	642.461	611.458	594.675	802.261	557.059	578.171	652.431	707.944	651.772	550.703	492.783	571.655	549.193	577.033	653.381	634.206
D3YZC9	Sf1	Splicing factor 1 OS=Mus musculus GN=Sf1 PE=1 SV=1	650.174	560.884	594.354	577.842	605.404	694.34	557.562	604.322	599.578	619.502	550.532	477.687	663.61	620.553	577.96	628.443	636.834	566.017	598.743	668.003	667.5	595.872	606.729	617.248
Q8K0D5	Gfm1	Elongation factor G, mitochondrial OS=Mus musculus GN=Gfm1 PE=1 SV=1	630.767	612.605	569.823	569.373	572.381	565.692	672.682	631.85	623.767	607.67	646.762	604.533	599.107	602.117	619.698	566.629	601.877	642.52	650.179	605.452	642.476	633.889	600.934	597.863
Q8BL86	Mblac2	Metallo-beta-lactamase domain-containing protein 2 OS=Mus musculus GN=Mblac2 PE=1 SV=2	671.607	648.863	619.562	638.763	626.938	660.571	565.926	594.794	583.613	578.268	503.785	630.39	627.826	635.792	569.558	562.8	635.339	631.927	604.732	554.778	559.399	646.865	615.869	654.676
Q3UNZ8	Quinone oxidoreductase-like protein 2 OS=Mus musculus	Quinone oxidoreductase-like protein 2 OS=Mus musculus PE=1 SV=1	572.416	605.171	586.687	600.345	620.822	598.803	564.278	565.719	539.99	680.654	592.618	706.447	730.355	659.562	612.85	788.609	625.884	676.686	597.046	542.366	618.577	630.073	615.269	618.159
P46978	Stt3a	Dolichyl-diphosphooligosaccharide--protein glycosyltransferase subunit STT3A OS=Mus musculus GN=Stt3a PE=1 SV=1	604.019	594.566	627.785	651.145	619.389	567.803	599.671	650.918	565.896	630.026	569.742	598.392	626.74	550.025	560.846	598.344	604.506	520.647	602.304	588.203	643.699	588.568	540.892	646.004
Q9D0Q7	Mrpl45	39S ribosomal protein L45, mitochondrial OS=Mus musculus GN=Mrpl45 PE=1 SV=1	602.317	558.185	586.879	495.315	609.902	566.407	659.104	591.264	686.112	554.513	638.767	760.34	591.6	662.984	620.767	627.645	564.82	633.852	605.918	634.173	555.585	608.598	659.857	551.801
Q9D711	Pir	Pirin OS=Mus musculus GN=Pir PE=1 SV=1	654.511	536.202	689.384	790.247	745.414	NA	601.302	634.451	629.497	682.445	705.13	NA	624.342	573.53	NA	659.588	647.501	576.293	570.112	731.569	684.059	564.723	657.344	500.601
P97494	Gclc	Glutamate--cysteine ligase catalytic subunit OS=Mus musculus GN=Gclc PE=1 SV=4	592.624	606.285	625.341	617.608	586.818	552.615	609.546	616.397	669.965	606.352	659.604	664.275	623.8	651.869	608.089	618.063	626.171	649.355	638.444	626.959	645.576	663.183	624.663	573.277
A0A0U1RP50	Iglon5	IgLON family member 5 (Fragment) OS=Mus musculus GN=Iglon5 PE=1 SV=1	NA	624.892	NA	603.522	NA	630.549	680.62	NA	545.978	NA	613.663	318.612	NA	626.537	689.038	NA	NA	662.198	547.019	792.535	NA	586.566	549.731	NA
Q8BYP3	Rhof	Rho-related GTP-binding protein RhoF OS=Mus musculus GN=Rhof PE=1 SV=1	581.848	632.4	660.316	594.772	659.507	602.342	546.302	581.281	578.363	632.364	532.109	603.676	525.295	549.937	585.725	651.34	599.846	623.406	624.048	596.493	662.725	553.391	618.549	651.414
O70443	Gnaz	Guanine nucleotide-binding protein G(z) subunit alpha OS=Mus musculus GN=Gnaz PE=1 SV=4	642.193	696.852	641.364	691.879	636.435	600.061	582.609	618.364	562.993	599.416	577.57	642.862	615.697	604.229	601.296	593.443	658.583	542.977	601.111	598.283	604.764	540.749	593.249	612.698
V9GWY0	Gm15013	40S ribosomal protein S4 OS=Mus musculus GN=Gm15013 PE=3 SV=1	646.348	658.759	671.83	589.625	630.728	630.638	596.564	572.313	507.188	544.446	548.783	558.751	486.797	508.233	622.974	541.378	522.493	461.705	608.721	568.48	517.904	523.094	610.878	581.245
B8JJ69	2310061I04Rik	RIKEN cDNA 2310061I04 gene OS=Mus musculus GN=2310061I04Rik PE=1 SV=1	618.311	702.812	576.208	523.851	574.438	579.452	632.756	686.902	686.96	666.303	611.294	710.219	558.371	728.591	623.67	654.552	586.014	571.514	623.069	677.648	581.75	580.072	687.795	619.227
Q6ZQ58	Larp1	La-related protein 1 OS=Mus musculus GN=Larp1 PE=1 SV=3	587.854	571.824	595.993	604.464	613.002	608.284	680.001	604.323	638.519	658.678	647.397	506.696	545.388	499.743	603.495	648.959	562.007	683.084	575.464	647.761	651.735	648.814	643.568	570.566
A0A0N4SVL0	Eif4g3	Eukaryotic translation initiation factor 4 gamma 3 OS=Mus musculus GN=Eif4g3 PE=1 SV=1	648.39	654.753	669.234	676.849	645.021	657.562	609.726	635.427	600.091	502.475	436.473	625.881	641.724	596.811	638.839	629.406	650.379	398.794	611.519	592.084	644.319	557.313	616.761	656.101
P32883-2	Kras	Isoform 2B of GTPase KRas OS=Mus musculus GN=Kras	593.193	590.611	587.794	576.308	579.007	573.62	591.001	604.266	615.217	605.158	636.004	641.991	665.765	645.157	607.418	604.842	632.565	659.909	590.542	594.893	617.932	613.138	598.132	618.41
Q08943-2	Ssrp1	Isoform 2 of FACT complex subunit SSRP1 OS=Mus musculus GN=Ssrp1	664.666	681.024	688.965	725.872	667.665	671.064	669.564	657.848	629.205	606.556	566.755	541.111	578.689	632.989	629.894	599.288	645.035	520.738	625.233	517.59	596.008	594.319	619.365	586.919
Q91Z38	Ttc1	Tetratricopeptide repeat protein 1 OS=Mus musculus GN=Ttc1 PE=1 SV=1	588.604	570.655	573.69	577.291	577.557	522.434	597.768	647.561	688.131	599.559	570.838	686.789	546.259	613.435	536.066	610.299	589.749	646.874	579.803	542.313	631.367	650.466	633.642	609.127
Q9CQ54	Ndufc2	NADH dehydrogenase [ubiquinone] 1 subunit C2 OS=Mus musculus GN=Ndufc2 PE=1 SV=1	595.282	589.032	607.015	589.238	611.797	597.67	670.88	658.242	629.647	627.194	680.568	572.472	569.778	567.79	610.636	602.441	586.878	614.191	654.089	669.028	615.273	619.285	645.696	548.149
Q9D3D0	Ttpal	Alpha-tocopherol transfer protein-like OS=Mus musculus GN=Ttpal PE=1 SV=3	679.491	652.674	642.39	677.242	651.206	618.086	653.6	610.743	576.71	664.981	625.638	630.548	626.067	575.417	656.447	681.693	612.488	612.465	647.772	614.762	635.189	581.979	631.848	641.409
Q9CR09	Ufc1	Ubiquitin-fold modifier-conjugating enzyme 1 OS=Mus musculus GN=Ufc1 PE=1 SV=1	519.989	605.161	600.976	602.203	643.352	535.557	641.527	637.056	666.815	631.387	657.469	624.429	628.034	706.235	627.532	695.703	650.945	740.746	654.775	594.659	645.595	579.001	633.586	532.5
O89116	Vti1a	Vesicle transport through interaction with t-SNAREs homolog 1A OS=Mus musculus GN=Vti1a PE=1 SV=1	664.402	744.48	NA	998.206	NA	797.85	647.824	731.77	493.385	NA	411.278	470.287	740.851	411.324	490.537	NA	651.806	623.019	682.205	777.479	NA	774.573	616.54	714.398
A2AQJ8	Ganc	Neutral alpha-glucosidase C OS=Mus musculus GN=Ganc PE=1 SV=1	774.916	687.261	645.412	736.395	915.128	514.909	405.84	572.868	NA	585.953	504.781	512.868	650.292	NA	615.262	638.19	646.892	340.893	730.981	693.808	624.898	599.769	NA	619.086
Q3TDD9	Ppp1r21	Protein phosphatase 1 regulatory subunit 21 OS=Mus musculus GN=Ppp1r21 PE=1 SV=2	599.266	611.309	580.575	611.838	590.816	625.21	636.764	602.743	649.1	616.962	585.795	569.46	578.037	624.44	599.526	631.483	595.884	653.495	606.298	634.142	589.224	642.561	606.48	587.779
A2CG49	Kalrn	Kalirin OS=Mus musculus GN=Kalrn PE=1 SV=1	620.608	655.168	623.963	648.384	628.262	636.805	660.568	626.109	619.927	650.666	649.524	653.837	630.339	586.308	660.393	622.88	637.508	616.577	658.23	605.402	633.025	604.762	630.417	624.882
E9Q0A7	Oxr1	Oxidation resistance protein 1 OS=Mus musculus GN=Oxr1 PE=1 SV=1	655.452	652.089	630.017	622.57	626.206	605.656	623.784	660.222	595.43	620.372	605.6	659.313	626.045	620.122	575.292	591.103	626.012	584.706	656.101	613.983	617.857	592.795	647.806	691.557
F6ZRK3	Slc1a2	Amino acid transporter (Fragment) OS=Mus musculus GN=Slc1a2 PE=1 SV=1	710.666	848.808	880.381	893.337	931.769	942.514	846.123	707.71	594.118	563.365	661.275	438.745	392.119	443.443	739.865	564.078	513.271	609.648	747.985	789.763	751.346	659.422	861.092	588.41
F8VPQ1	Dock3	Dedicator of cytokinesis protein 3 OS=Mus musculus GN=Dock3 PE=1 SV=1	612.481	622.257	642.39	661	628.743	612.463	628.298	634.38	638.226	607.482	642.865	668.695	694.844	671.572	639.565	618.786	680.862	647.726	601.213	605.854	606.497	605.378	611.53	649.161
Q6P5B5	Fxr2	Fragile X mental retardation syndrome-related protein 2 OS=Mus musculus GN=Fxr2 PE=1 SV=1	625.465	635.202	639.146	587.096	617.459	683.041	605.757	641.58	598.307	632.622	588.209	534.773	586.443	591.078	485.629	623.003	606.758	604.591	634.804	640.726	634.863	622.271	592.772	649.957
Q9CRB2	Nhp2	H/ACA ribonucleoprotein complex subunit 2 OS=Mus musculus GN=Nhp2 PE=1 SV=1	657.428	600.22	614.671	545.977	627.641	592.629	626.48	642.062	662.342	577.542	576.855	650.778	730.795	778.42	615.449	545.185	687.335	682.746	612.56	571.589	649.423	706.689	631.974	696.721
Q60973	Rbbp7	Histone-binding protein RBBP7 OS=Mus musculus GN=Rbbp7 PE=1 SV=1	609.311	623.759	617.816	589.21	586.388	610.717	625.816	624.3	636.758	613.929	645.732	625.108	621.353	613.083	634.627	611.573	606.822	644.064	623.542	626.792	603.009	622.913	641.048	570.758
G3X9A7	Plcxd3	MCG49978 OS=Mus musculus GN=Plcxd3 PE=1 SV=1	671.336	739.913	638.646	697.494	644.104	631.675	627.657	642.431	576.362	621.093	560.944	603.057	576.966	599.44	520.551	518.963	628.325	483.119	598.384	606.159	550.272	556.316	599.713	712.586
F6WMJ3	Arhgef6	Rho guanine nucleotide exchange factor 6 OS=Mus musculus GN=Arhgef6 PE=1 SV=1	654.501	648.937	606.002	552.524	600.6	587.148	622.029	645.259	572.93	615.056	578.665	616.946	549.587	579.965	573.59	634.695	582.392	588.433	647.87	606.406	603.055	639.817	662.025	614.07
Q9QYB1	Clic4	Chloride intracellular channel protein 4 OS=Mus musculus GN=Clic4 PE=1 SV=3	694.921	617.112	675.022	623.786	600.072	578.776	597.874	553.967	629.57	578.06	674.797	683.214	650.886	704.777	580.762	579.801	648.427	684.42	651.321	694.631	626.729	740.582	679.199	686.666
Q8R242	Ctbs	Di-N-acetylchitobiase OS=Mus musculus GN=Ctbs PE=1 SV=2	511.663	NA	NA	593.379	NA	611.492	NA	634.964	NA	NA	731.163	692.269	598.107	NA	734.95	NA	547.688	NA	NA	550.745	NA	NA	NA	535.634
D3YV13	Dtx3	Probable E3 ubiquitin-protein ligase DTX3 OS=Mus musculus GN=Dtx3 PE=1 SV=1	573.988	620.297	634.906	563.766	572.017	583.368	629.664	559.913	596.281	579.932	555.747	607.948	732.367	672.849	614.069	661.334	637.581	636.837	579.034	611.287	659.219	603.855	580.004	599.205
P40142	Tkt	Transketolase OS=Mus musculus GN=Tkt PE=1 SV=1	624.498	616.859	634.976	588.903	617.49	601.985	630.07	600.32	626.312	595.662	621.736	597.301	612.01	645.206	622.573	615.298	619.17	634.642	614.906	644.507	638.37	634.497	660.014	587.055
P63242	Eif5a	Eukaryotic translation initiation factor 5A-1 OS=Mus musculus GN=Eif5a PE=1 SV=2	653.901	673.906	647.315	655.924	612.925	618.219	607.197	607.141	556.777	576.663	580.091	597.348	575.912	573.068	593.514	575.848	584.272	546.77	627.541	645.647	564.017	549.102	604.719	621.359
Q3UHF7	Hivep2	Transcription factor HIVEP2 OS=Mus musculus GN=Hivep2 PE=1 SV=1	673.165	NA	NA	810.023	NA	642.221	NA	603.964	NA	NA	707.054	640.203	694.592	NA	681.505	NA	819.67	NA	NA	695.204	NA	NA	NA	699.63
P51175	Ppox	Protoporphyrinogen oxidase OS=Mus musculus GN=Ppox PE=1 SV=1	593.013	669.342	670.758	680.529	621.531	616.881	805.181	709.16	632.17	581.239	634.187	639.078	448.881	552.426	655.521	626.998	598.324	633.4	609.124	644.409	646.509	650.934	700.091	623.325
G3X9K4	Ppp6r2	SAPS domain family, member 2, isoform CRA_a OS=Mus musculus GN=Ppp6r2 PE=1 SV=1	598.1	584.647	570.067	614.805	583.836	559.366	607.674	588.135	628.892	665.589	651.196	705.068	685.951	666.866	577.575	699.888	657.028	638.289	600.317	646.322	619.872	620.371	593.226	639.57
Q99PL5	Rrbp1	Ribosome-binding protein 1 OS=Mus musculus GN=Rrbp1 PE=1 SV=2	623.865	606.495	628.523	639.263	604.345	659.302	653.233	606.04	644.283	594.513	651.31	589.392	578.072	588.961	642.988	603.149	574.587	689.847	674.672	668.043	654.478	714.953	632.595	626.464
Q8C052	Map1s	Microtubule-associated protein 1S OS=Mus musculus GN=Map1s PE=1 SV=2	604.684	617.149	598.727	620.818	605.665	593.181	609.616	614.273	616.727	640.102	627.537	612.397	588.178	571.509	592.035	678.928	585.917	596.566	586.156	619.008	600.082	576.73	623.076	591.608
E9Q9H0	Dlg1	Disks large homolog 1 OS=Mus musculus GN=Dlg1 PE=1 SV=1	611.889	615.357	633.952	630.858	642.96	631.612	644.376	643.068	662.251	640.897	646.303	690.789	642.629	652.304	654.684	644.501	624.58	674.779	673.242	650.012	664.532	645.713	667.479	616.336
G3X914	Cul5	Cullin 5 OS=Mus musculus GN=Cul5 PE=1 SV=1	628.553	635.218	624.651	633.818	620.087	620.019	604.64	616.604	603.536	607	606.125	569.46	582.386	581.937	600.327	609.904	605.093	570.368	632.053	586.052	605.186	580.491	593.633	602.327
Q8CGA0	Ppm1f	Protein phosphatase 1F OS=Mus musculus GN=Ppm1f PE=1 SV=1	625.353	613.266	622.492	608.683	647.412	602.624	668.204	632.765	615.424	594.84	635.566	670.133	666.217	659.897	590.28	625.793	684.502	625.282	595.083	630.844	624.605	634.053	594.588	630.253
Q924Z4	Cers2	Ceramide synthase 2 OS=Mus musculus GN=Cers2 PE=1 SV=1	NA	636.493	NA	592.244	NA	547.396	755.55	NA	NA	NA	800.669	662.4	NA	NA	697.781	NA	NA	872.692	673.573	693.557	NA	754.731	NA	NA
P21126	Ubl4a	Ubiquitin-like protein 4A OS=Mus musculus GN=Ubl4a PE=1 SV=1	606.924	576.233	616.026	599.567	603.599	618.635	642.614	606.635	609.441	617.934	534.743	539.315	624.641	618.747	617.77	616.475	585.502	672.423	654.072	636.562	623.933	638.656	615.874	557.011
A6ZI46	Aldoart1	Fructose-bisphosphate aldolase OS=Mus musculus GN=Aldoart1 PE=1 SV=1	651.006	630.793	662.939	677.995	662.669	681.2	588.268	598.309	508.015	551.862	542.166	486.164	450.731	475.01	580.792	539.526	505.494	481.623	569.208	618.329	551.331	520.075	616.227	627.818
Q8BGV8	Mief1	Mitochondrial dynamics protein MID51 OS=Mus musculus GN=Mief1 PE=1 SV=1	604.828	540.547	469.54	NA	482.67	503.259	668.466	603.453	NA	793.411	NA	815.642	620.997	NA	602.119	587.606	568.465	710.819	634.567	NA	514.572	613.329	NA	495.667
P48774	Gstm5	Glutathione S-transferase Mu 5 OS=Mus musculus GN=Gstm5 PE=1 SV=1	666.038	625.079	622.764	647.925	616.565	623.752	579.822	625.623	522.113	566.24	516.535	556.631	575.658	553.036	579.803	635.747	621.532	522.849	549.632	575.343	563.886	507.881	584.347	610.604
P59017	Bcl2l13	Bcl-2-like protein 13 OS=Mus musculus GN=Bcl2l13 PE=1 SV=2	578.597	578.457	618.788	637.032	604.573	714.664	589.271	650.577	623.739	647.413	572.423	401.227	609.66	530.858	573.008	612.968	623.937	527.489	497.812	637.291	626.236	527.902	648.444	649.003
A0A0G2JEC4	Sh3glb1	Endophilin-B1 OS=Mus musculus GN=Sh3glb1 PE=1 SV=1	596.446	596.067	589.735	559.85	592.125	665.683	602.316	577.317	553.369	614.645	557.722	570.322	530.947	434.12	601.423	605.747	543.741	579.761	614.539	570.98	624.52	613.092	601.394	628.397
A0A1B0GS08	Stum	Protein stum homolog OS=Mus musculus GN=Stum PE=1 SV=1	663.666	625.394	621.006	746.731	760.531	780.404	640.718	626.652	567.115	581.057	656.249	695.059	565.401	517.237	498.794	609.194	642.063	622.407	636.32	707.627	613.005	609.053	613.16	706.453
Q8BGK9	Uncharacterized protein C3orf18 homolog OS=Mus musculus	Uncharacterized protein C3orf18 homolog OS=Mus musculus PE=2 SV=1	564.742	NA	NA	535.546	NA	504.279	NA	646.296	NA	NA	626.606	517.609	623.554	NA	524.818	NA	635.637	NA	NA	613.948	NA	NA	NA	657.238
Q921S7	Mrpl37	39S ribosomal protein L37, mitochondrial OS=Mus musculus GN=Mrpl37 PE=1 SV=1	638.993	595.023	622.444	581.99	581.163	545.56	695.784	609.672	598.443	588.269	681.809	655.999	647.388	580.366	604.957	635.629	621.929	631.785	592.264	594.716	609.51	644.485	583.712	556.146
P48320	Gad2	Glutamate decarboxylase 2 OS=Mus musculus GN=Gad2 PE=1 SV=1	654.356	647.318	653.497	628.738	660.171	675.958	537.233	557.644	576.026	561.143	582.022	577.553	555.804	593.53	545.102	554.879	551.615	572.674	588.413	612.055	561.316	602.423	601.768	597.962
Q9JJV5	Cacng3	Voltage-dependent calcium channel gamma-3 subunit OS=Mus musculus GN=Cacng3 PE=2 SV=2	584.183	621.193	717.177	674.987	712.582	728.275	615.898	656.155	688.117	592.32	663.527	534.415	517.707	663.395	636.555	628.153	601.924	589.441	611.343	631.043	584.602	540.936	620.318	523.183
A0A140T8M7	Rpl23a-ps3	Uncharacterized protein OS=Mus musculus GN=Rpl23a-ps3 PE=3 SV=1	601.518	625.097	639.452	624.879	611.828	639.327	632.175	636.433	625.359	604.726	606.544	513.57	518.625	565.084	620.122	595.22	555.104	545.775	588.688	630.633	609.866	562.921	610.131	546.896
Q3UMA3	Hgs	Hepatocyte growth factor-regulated tyrosine kinase substrate OS=Mus musculus GN=Hgs PE=1 SV=1	588.074	602.664	637.552	610.839	614.072	613.057	665.719	632.38	598.475	590.398	576.748	524.597	520.494	488.28	605.448	583.542	573.459	529.302	588.025	661.416	614.011	587.654	664.277	558.008
Q8BMB0	Emsy	BRCA2-interacting transcriptional repressor EMSY OS=Mus musculus GN=Emsy PE=1 SV=2	650.526	NA	NA	575.701	NA	551.779	NA	707.063	659.782	NA	688.789	693.014	654.045	714.515	687.169	NA	752.049	NA	NA	847.452	NA	NA	538.838	653.168
Q9CQI6	Cotl1	Coactosin-like protein OS=Mus musculus GN=Cotl1 PE=1 SV=3	654.288	634.877	666.315	676.749	701.362	723.511	529.808	580.03	503.381	610.687	420.463	476.81	521.697	457.521	530.549	652.207	572.089	501.38	521.268	621.206	600.596	502.151	590.043	694.148
B2RUG9	Apc	Adenomatosis polyposis coli OS=Mus musculus GN=Apc PE=1 SV=1	600.323	636.988	545.637	625.539	592.572	633.034	743.818	656.202	657.888	684.051	655.52	627.378	517.56	665.543	661.457	683.087	568.934	750.252	666.409	614.135	624.195	679.268	630.833	573.605
Q9WVJ2	Psmd13	26S proteasome non-ATPase regulatory subunit 13 OS=Mus musculus GN=Psmd13 PE=1 SV=1	620.613	617.6	606.369	606.957	606.964	595.949	596.673	631.178	578.88	607.781	600.901	601.206	574.122	611.121	578.945	598.813	606.414	564.015	602.959	617.717	624.841	579.108	600.696	613.296
A0A0R4J112	Eif4g3	Eukaryotic translation initiation factor 4 gamma 3 OS=Mus musculus GN=Eif4g3 PE=1 SV=1	651.319	656.619	669.234	677.604	645.021	662.244	609.127	634.534	598.625	502.475	435.042	623.127	639.93	590.033	640.092	629.406	650.722	396.311	611.268	586.965	644.319	553.803	617.957	656.993
Q91VK1	Bzw2	Basic leucine zipper and W2 domain-containing protein 2 OS=Mus musculus GN=Bzw2 PE=1 SV=1	623.238	647.817	661.755	675.664	646.098	682.597	627.032	614.315	559.48	622.474	634.963	601.972	800.31	760.478	590.112	695.007	759.702	581.394	659	578.064	629.334	587.896	569.437	705.979
Q8BMA6	Srp68	Signal recognition particle subunit SRP68 OS=Mus musculus GN=Srp68 PE=1 SV=2	634.559	601.745	628.717	609.563	685.807	594.749	569.276	567.437	622.838	598.382	573.366	597.274	555.028	603.857	567.638	537.41	588.641	594.664	602.147	600.535	628.542	622.015	604.404	614.556
Q60803	Traf3	TNF receptor-associated factor 3 OS=Mus musculus GN=Traf3 PE=1 SV=2	620.097	688.541	668.045	613.774	692.852	654.681	705.565	670.536	718.461	622.086	804.378	548.486	531.173	593.482	701.651	668.281	594.9	628.447	587.859	776.241	680.903	689.038	697.897	528.427
Q8K0T0	Rtn1	Reticulon-1 OS=Mus musculus GN=Rtn1 PE=1 SV=1	609.887	599.857	603.369	639.14	620.667	618.74	633.608	629.59	588.265	622.165	633.168	642.435	562.066	536.984	591.441	581.77	598.458	636.64	625.322	632.24	601.698	596.252	620.983	566.464
Q8BG30	Nelfa	Negative elongation factor A OS=Mus musculus GN=Nelfa PE=1 SV=1	557.179	477.962	655.19	573.924	622.177	566.342	633.829	636.996	706.214	530.063	737.14	588.056	736.08	726.902	705.752	565.281	713.352	813.566	619.049	628.213	713.032	588.804	609.642	664.754
Q99PV0	Prpf8	Pre-mRNA-processing-splicing factor 8 OS=Mus musculus GN=Prpf8 PE=1 SV=2	611.633	607.001	642.434	630.87	647.91	625.559	625.988	621.506	616.653	609.449	591.099	631.806	637.94	628.377	636.856	608.641	635.525	638.771	594.616	586.663	620.772	617.687	588.87	598.541
Q3UHD1	Bai1	Brain-specific angiogenesis inhibitor 1 OS=Mus musculus GN=Bai1 PE=1 SV=1	568.426	583.543	594.9	611.133	599.938	600.204	627.471	600.579	662.828	638.575	680.849	617.074	612.089	603.075	630.945	624.701	626.143	658.024	674.83	653.35	646.156	647.779	622.677	581.678
Q8BVQ9	Psmc2	26S protease regulatory subunit 7 OS=Mus musculus GN=Psmc2 PE=1 SV=1	598.591	605.594	618.486	588.185	605.276	588.616	621.923	624.931	637.583	621.303	631.66	673.156	647.595	630.818	627.65	609.315	616.842	645.921	631.409	607.633	638.201	629.806	616.578	605.525
Q8C079	Strip1	Striatin-interacting protein 1 OS=Mus musculus GN=Strip1 PE=1 SV=2	616.991	612.847	603.232	581.847	612.787	627.267	638.179	613.737	613.311	624.651	566.136	550.599	527.866	585.753	601.709	591.872	550.059	565.584	603.172	590.373	599.158	558.365	619.727	559.366
B1AZF3	Aatk	Serine/threonine-protein kinase LMTK1 OS=Mus musculus GN=Aatk PE=1 SV=1	669.328	588.571	697.695	660.468	668.817	712.246	657.459	650.083	656.214	793.517	529.685	583.362	640.724	610.155	634.216	747.367	649.54	651.549	600.056	629.889	681.613	678.282	651.284	687.184
Q9JMA1	Usp14	Ubiquitin carboxyl-terminal hydrolase 14 OS=Mus musculus GN=Usp14 PE=1 SV=3	633.627	626.913	620.781	619.23	603.525	631.54	640.942	610.977	607.545	599.452	598.051	637.479	629.45	643.661	616.204	621.616	663.26	633.332	597.633	589.601	620.021	627.191	617.68	703.902
Q9R0Y5-2	Ak1	Isoform 2 of Adenylate kinase isoenzyme 1 OS=Mus musculus GN=Ak1	605.333	626.555	621	579.204	622.028	590.205	602.673	600.457	590.817	611.037	557.344	666.654	651.825	650.425	609.079	614.253	632.483	643.997	633.695	592.365	612.447	599.207	592.673	615.378
Q8BJU9	Mtrf1l	Peptide chain release factor 1-like, mitochondrial OS=Mus musculus GN=Mtrf1l PE=2 SV=1	NA	583.308	907.22	509.561	648.561	NA	541.534	NA	514.662	512.282	631.584	NA	NA	298.265	NA	439.665	NA	318.989	373.664	563.512	699.097	336.94	661.423	NA
O88811	Stam2	Signal transducing adapter molecule 2 OS=Mus musculus GN=Stam2 PE=1 SV=1	605.786	600.415	619.048	605.591	616.464	585.822	660.178	603.324	667.564	625.361	640.3	592.977	682.568	672.155	658.743	614.215	658.59	668.345	662.199	624.042	613.374	667.394	654.134	640.398
Q99LF4	Rtcb	tRNA-splicing ligase RtcB homolog OS=Mus musculus GN=Rtcb PE=1 SV=1	614.767	628.936	644.878	600.292	591.32	595.283	650.204	615.304	620.316	619.05	632.176	573.959	569.942	552.163	637.285	626.506	611.962	644.741	593.156	600.285	649.635	651.013	633.885	592.19
Q61271	Acvr1b	Activin receptor type-1B OS=Mus musculus GN=Acvr1b PE=1 SV=1	651.059	651.488	482.134	703.892	578.325	653.392	617.309	534.404	583.574	589.663	552.4	610.116	790.341	841.276	626.511	543.799	805.537	718.82	594.545	559.343	627.445	598.771	518.732	583.534
P12382	Pfkl	ATP-dependent 6-phosphofructokinase, liver type OS=Mus musculus GN=Pfkl PE=1 SV=4	599.185	608.755	587.851	667.763	620.828	631.343	606.089	633.846	590.735	623.559	615.837	662.222	611.113	615.246	639.083	631.754	612.525	585.35	632.568	610.228	613.448	565.213	612.095	607.144
Q9JMF3	Gng13	Guanine nucleotide-binding protein G(I)/G(S)/G(O) subunit gamma-13 OS=Mus musculus GN=Gng13 PE=1 SV=1	610.208	631.946	564.819	592.365	599.978	574.287	661.102	613.688	540.129	564.405	574.98	580.473	633.25	529.024	609.728	586.77	553.457	628.288	641.607	561.088	578.633	531.94	580.374	622.245
Q8BFR4	Gns	N-acetylglucosamine-6-sulfatase OS=Mus musculus GN=Gns PE=1 SV=1	584.531	603.436	636.762	601.641	665.521	565.999	713.41	618.267	630.924	637.486	655.008	614.95	674.572	684.407	642.101	633.601	674.148	666.142	673.55	645.278	694.754	694.496	579.088	599.525
Q9JIX8	Acin1	Apoptotic chromatin condensation inducer in the nucleus OS=Mus musculus GN=Acin1 PE=1 SV=3	565.607	572.667	627.857	604.732	596.783	615.944	638.402	634.936	664.095	662.127	678.461	552.001	579.277	625.755	694.719	645.221	568.309	666.74	573.384	671.556	605.026	576.093	634.229	551.774
G5E870	Trip12	E3 ubiquitin-protein ligase TRIP12 OS=Mus musculus GN=Trip12 PE=1 SV=1	550.98	567.647	567.94	582.697	571.849	583.096	595.136	600.402	687.015	647.771	626.227	682.768	736.237	671.003	624.644	637.472	684.049	674.571	603.738	588.722	631.098	607.659	618.344	517.856
Q810C1	Slitrk1	SLIT and NTRK-like protein 1 OS=Mus musculus GN=Slitrk1 PE=2 SV=1	731.137	743.43	564.356	537.586	493.706	642.804	612.724	617.388	692.254	605.629	557.09	647.238	716.186	652.174	658.772	491.974	619.014	557.516	668.428	508.691	570.495	598.54	638.615	663.037
Q9D281	Fam114a1	Protein Noxp20 OS=Mus musculus GN=Fam114a1 PE=1 SV=1	532.835	NA	NA	861.458	NA	770.879	NA	572.437	NA	NA	603.363	354.688	706.536	NA	686.893	NA	684.095	NA	NA	699.148	NA	NA	NA	781.809
Q80UW2	Fbxo2	F-box only protein 2 OS=Mus musculus GN=Fbxo2 PE=1 SV=1	607.541	589.908	688.633	592.185	621.721	562.862	642.763	613.1	611.864	605.145	611.289	637.057	631.179	678.739	561.522	620.97	629.165	571.86	664.49	642.191	665.432	659.34	617.754	625.562
Q9WVS7	Map2k5	Dual specificity mitogen-activated protein kinase kinase 5 OS=Mus musculus GN=Map2k5 PE=1 SV=1	586.107	623.905	NA	591.126	NA	706.095	575.619	538.335	544.171	NA	638.923	474.169	693	524.787	581.594	NA	625.974	526.98	563.249	679.737	NA	526.93	644.707	617.357
P57746	Atp6v1d	V-type proton ATPase subunit D OS=Mus musculus GN=Atp6v1d PE=1 SV=1	641.818	619.322	661.433	600.281	645.735	614.588	596.284	605.726	563.603	574.798	522.075	598.476	588.989	613.324	548.9	553.001	612.334	546.529	605.735	602.952	572.701	547.44	590.825	673.385
B7ZNU9	Sntb2	Beta-2-syntrophin OS=Mus musculus GN=Sntb2 PE=1 SV=1	584.744	580.824	635.732	655.065	597.658	656.02	561.725	611.473	615.038	572.681	627.898	636.67	667.582	582.393	668.48	623.59	628.52	549.49	568.768	648.159	614.909	599.847	592.468	573.679
Q8K356	Ly6h	Lymphocyte antigen 6 complex, locus H OS=Mus musculus GN=Ly6h PE=1 SV=1	714.156	623.058	645.232	684.811	542.268	732.371	562.286	584.731	515.414	525.121	470.057	237.073	290.635	329.64	668.388	490.165	470.216	479.669	527.364	645.313	633.024	499.882	676.836	542.517
O55143	Atp2a2	Sarcoplasmic/endoplasmic reticulum calcium ATPase 2 OS=Mus musculus GN=Atp2a2 PE=1 SV=2	620.323	600.996	592.777	639.256	614.6	638.502	567.617	587.355	556.558	588.875	571.557	581.634	575.145	575.982	574.916	575.944	580.719	568.786	589.876	604.774	585.864	556.39	591.352	628.418
E9PVP0	Stard10	PCTP-like protein OS=Mus musculus GN=Stard10 PE=1 SV=1	688.481	666.034	808.166	570.326	658.565	679.334	537.268	501.077	593.469	647.536	464.123	440.634	621.317	587.124	470.454	728.558	568.387	536.266	593.12	540.935	577.783	561.05	603.31	882.975
Q91WK2	Eif3h	Eukaryotic translation initiation factor 3 subunit H OS=Mus musculus GN=Eif3h PE=1 SV=1	689.408	652.156	657.239	739.871	584.315	666.404	619.767	596.376	478.846	527.373	503.898	359.718	477.136	456.437	648.608	513.208	558.378	533.977	640.647	681.264	563.288	615.997	620.46	689.997
Q6PAV2	Herc4	Probable E3 ubiquitin-protein ligase HERC4 OS=Mus musculus GN=Herc4 PE=1 SV=2	607.652	612.335	601.471	580.684	620.909	644.875	571.362	598	553.336	615.149	570.636	593.75	687.823	546.53	587.255	595.249	656.666	595.112	628.652	579.893	554.891	580.448	613.343	690.768
Q91YT7	Ythdf2	YTH domain-containing family protein 2 OS=Mus musculus GN=Ythdf2 PE=1 SV=1	NA	695.904	NA	622.226	NA	623.312	563.043	NA	676.047	NA	653.09	537.5	NA	617.237	649.787	NA	NA	610.594	633.198	573.388	NA	595.227	502.094	NA
Q8C1E7	Tmem120a	Transmembrane protein 120A OS=Mus musculus GN=Tmem120a PE=1 SV=1	563.882	526.718	491.417	571.295	589.153	552.584	545.81	617.309	612.696	566.315	583.191	693.946	670.155	581.999	607.177	478.478	582.448	521.059	541.797	613.649	592.329	589.227	578.745	590.417
G3XA57-2	Rab11fip2	Isoform 2 of Rab11 family-interacting protein 2 OS=Mus musculus GN=Rab11fip2	583.269	589.006	602.63	632.772	617.195	629.654	648.462	616.612	675.977	696.031	689.869	767.494	670.168	705.621	749.571	704.516	704.197	701.651	622.354	590.893	647.11	626.622	571.488	541.442
Q9Z1T1	Ap3b1	AP-3 complex subunit beta-1 OS=Mus musculus GN=Ap3b1 PE=1 SV=2	628.391	610.768	669.494	675.114	631.149	651.826	591.567	559.93	554.262	576.823	560.577	507.977	430.464	614.889	595.33	568.296	490.216	556.827	563.087	620.539	590.095	543.438	552.03	604.234
Q6PDI6	Mindy2	Ubiquitin carboxyl-terminal hydrolase MINDY-2 OS=Mus musculus GN=Mindy2 PE=1 SV=1	524.987	619.191	566.423	661.632	542.439	550.849	676.927	645.363	625.885	669.185	672.325	632.61	648.784	578.921	620.184	743.628	638.393	734.061	563.921	571.686	675.131	642.654	576.078	520.556
P19246	Nefh	Neurofilament heavy polypeptide OS=Mus musculus GN=Nefh PE=1 SV=3	650.982	592.151	599.582	594.548	620.608	597.171	632.342	603.177	623.806	576.986	614.358	641.624	548.887	580.91	569.518	634.722	554.769	549.617	651.843	657.091	646.807	664.06	639.055	572.32
Q9QXL2-3	Kif21a	Isoform 3 of Kinesin-like protein KIF21A OS=Mus musculus GN=Kif21a	611.734	629.497	637.711	631.324	604.011	623.993	646.621	629.763	659.021	638.137	620.298	585.955	574.925	603.771	630.629	652.294	616.119	643.961	619.249	621.631	650.908	620.614	672.273	586.421
[truncated: 6,373 more rows]

## Sheet: Phosphoproteomics
Identifier	Protein	Gene	Description	#_Phos_Sites	PhosphoRS: Best Site Probabilities	PepLocs	ProtLocs	Flank_Seq	ANOVA_p	Kmeans_Cluster	4.5month_WT_WT_Rep1	4.5month_WT_WT_Rep2	4.5month_WT_WT_Rep3	4.5month_HOM_WT_Rep1	4.5month_HOM_WT_Rep2	4.5month_HOM_WT_Rep3	4.5month_WT_APP_Rep1	4.5month_WT_APP_Rep2	4.5month_WT_APP_Rep3	4.5month_HOM_APP_Rep1	4.5month_HOM_APP_Rep2	4.5month_HOM_APP_Rep3	6month_WT_WT_Rep1	6month_WT_WT_Rep2	6month_WT_WT_Rep3	6month_HOM_WT_Rep1	6month_HOM_WT_Rep2	6month_HOM_WT_Rep3	6month_WT_APP_Rep1	6month_WT_APP_Rep2	6month_WT_APP_Rep3	6month_HOM_APP_Rep1	6month_HOM_APP_Rep2	6month_HOM_APP_Rep3
[truncated: 28,084 more rows]
